# Supplementary material for: CRISPR-Cas9 Editing in Maize: Systematic Evaluation of Off-target Activity and Its Relevance in Crop Improvement
Source: PubMed Central journal article supplement (PMC6491584; doi:10.1038/s41598-019-43141-6), 2019-04-30
Supplement: 41598_2019_43141_MOESM1_ESM.pdf [file 41598_2019_43141_MOESM1_ESM.pdf]

**Supplementary Table 1.** A shortlist of computationally predicted M1 sites. On-target site is shown on the top. DNA and RNA Bulges are shown as gray and black boxes, respectively. Mismatches are shown in color boxes.

| Site | Computational prediction |       | Sequence |    |    |    |    |    |    |    |    |    |    |    |   |   |   |   |   |   |   | Genomic Location | Avg CLEAVE-Seq Reads |   |   |   |                           |        |
|------|--------------------------|-------|----------|----|----|----|----|----|----|----|----|----|----|----|---|---|---|---|---|---|---|------------------|----------------------|---|---|---|---------------------------|--------|
|      | Mismatch                 | Bulge | 21       | 20 | 19 | 18 | 17 | 16 | 15 | 14 | 13 | 12 | 11 | 10 | 9 | 8 | 7 | 6 | 5 | 4 | 3 |                  |                      | 2 | 1 | 0 | -1                        | -2     |
|      | 0                        | 0     | G        | C  | A  | C  | G  | T  | A  | C  | G  | T  | C  | A  | C | C | A | T | C | C | C | G                | C                    | C | G | G | Chr1:14702765-14702788    | 200.78 |
| 1    | 2                        | 1     |          |    |    |    |    |    |    |    |    |    |    |    |   |   |   |   |   |   |   |                  |                      |   |   |   | Chr7:16502824-16502847    | 0.78   |
| 2    | 2                        | 1     |          |    |    |    |    |    |    |    |    |    |    |    |   |   |   |   |   |   |   |                  |                      |   |   |   | Chr3:12444708-12444731    | 0.00   |
| 3    | 2                        | 1     |          |    |    |    |    |    |    |    |    |    |    |    |   |   |   |   |   |   |   |                  |                      |   |   |   | Chr1:54992863-54992886    | 0.00   |
| 4    | 2                        | 1     |          |    |    |    |    |    |    |    |    |    |    |    |   |   |   |   |   |   |   |                  |                      |   |   |   | Chr8:38361070-38361093    | 1.41   |
| 5    | 2                        | 1     |          |    |    |    |    |    |    |    |    |    |    |    |   |   |   |   |   |   |   |                  |                      |   |   |   | Chr8:73407823-73407846    | 0.00   |
| 6    | 2                        | 1     |          |    |    |    |    |    |    |    |    |    |    |    |   |   |   |   |   |   |   |                  |                      |   |   |   | Chr10:26835370-26835393   | 1.46   |
| 7    | 2                        | 1     |          |    |    |    |    |    |    |    |    |    |    |    |   |   |   |   |   |   |   |                  |                      |   |   |   | Chr10:26867320-26867343   | 0.00   |
| 8    | 2                        | 1     |          |    |    |    |    |    |    |    |    |    |    |    |   |   |   |   |   |   |   |                  |                      |   |   |   | Chr10:142898890-142898913 | 0.21   |
| 9    | 2                        | 1     |          |    |    |    |    |    |    |    |    |    |    |    |   |   |   |   |   |   |   |                  |                      |   |   |   | Chr7:5753958-5753981      | 3.02   |
| 10   | 2                        | 1     |          |    |    |    |    |    |    |    |    |    |    |    |   |   |   |   |   |   |   |                  |                      |   |   |   | Chr7:156486399-156486422  | 3.02   |
| 11   | 2                        | 1     |          |    |    |    |    |    |    |    |    |    |    |    |   |   |   |   |   |   |   |                  |                      |   |   |   | Chr5:182622499-182622522  | 0.00   |
| 12   | 2                        | 1     |          |    |    |    |    |    |    |    |    |    |    |    |   |   |   |   |   |   |   |                  |                      |   |   |   | Chr1:77630220-77630243    | 0.00   |
| 13   | 2                        | 1     |          |    |    |    |    |    |    |    |    |    |    |    |   |   |   |   |   |   |   |                  |                      |   |   |   | Chr1:84645608-84645631    | 0.00   |
| 14   | 2                        | 1     |          |    |    |    |    |    |    |    |    |    |    |    |   |   |   |   |   |   |   |                  |                      |   |   |   | Chr3:56838689-56838712    | 0.00   |
| 15   | 2                        | 1     |          |    |    |    |    |    |    |    |    |    |    |    |   |   |   |   |   |   |   |                  |                      |   |   |   | Chr2:29281983-29282006    | 0.63   |

**Supplementary Table 2.** CLEAVE-seq data and A shortlist of computationally predicted M3 sites. On-target site is shown on the top. DNA and RNA Bulges are shown as gray and black boxes, respectively. Mismatches are shown in color boxes.

| Site | Computational prediction |       | Sequence |    |    |    |    |    |    |    |    |    |    |   |   |   | Genomic Location | Avg CLEAVE-Seq Reads |   |   |   |   |   |   |                          |                      |        |
|------|--------------------------|-------|----------|----|----|----|----|----|----|----|----|----|----|---|---|---|------------------|----------------------|---|---|---|---|---|---|--------------------------|----------------------|--------|
|      | Mismatch                 | Bulge | 20       | 19 | 18 | 17 | 16 | 15 | 14 | 13 | 12 | 11 | 10 | 9 | 8 | 7 |                  |                      | 6 | 5 | 4 | 3 | 2 | 1 | 0                        | -1                   | -2     |
|      | 0                        | 0     | G        | C  | G  | G  | A  | G  | A  | C  | T  | A  | A  | G | T | G | G                | C                    | T | G | T | A | G | G | G                        | Chr2:4233941-4233964 | 164.19 |
| 1    | 2                        | 1     |          |    |    |    |    |    |    |    | A  |    |    |   |   |   |                  |                      |   |   |   | G | T |   | Chr2:172786227-172786250 | 0.00                 |        |
| 2    | 2                        | 1     |          |    |    |    |    |    |    |    |    |    |    |   |   |   | T                | A                    |   |   |   |   | A |   | Chr7:43812401-43812424   | 2.46                 |        |
| 3    | 2                        | 1     |          |    |    |    |    |    |    | C  |    |    |    |   |   |   |                  |                      |   |   |   | G | A |   | Chr2:120060642-120060665 | 0.00                 |        |
| 4    | 2                        | 1     |          |    |    |    |    |    |    |    | G  |    |    |   | c |   |                  |                      |   |   | A | G | A |   | Chr5:93791118-93791140   | 0.00                 |        |
| 5    | 2                        | 1     |          |    |    |    |    |    |    |    | G  |    |    |   | c |   |                  |                      |   |   | A | G | A |   | Chr3:196197068-196197090 | 0.00                 |        |
| 6    | 2                        | 1     |          |    |    |    |    |    |    | G  |    |    |    |   |   |   |                  |                      |   |   |   |   | G | A | Chr5:168532712-168532734 | 0.00                 |        |
| 7    | 2                        | 1     |          |    |    |    |    |    |    |    | G  |    |    |   | c |   |                  |                      |   |   | A | G | A |   | Chr7:115695254-115695276 | 0.00                 |        |
| 8    | 2                        | 1     |          |    |    |    |    |    |    |    | G  |    |    |   | c |   |                  |                      |   |   | A | G | A |   | Chr7:62777273-62777295   | 0.00                 |        |
| 9    | 2                        | 1     |          |    |    |    |    |    |    |    | G  | C  |    |   |   |   |                  |                      |   |   |   |   | G | A | Chr1:147217001-147217023 | 0.00                 |        |
| 10   | 2                        | 1     |          |    |    |    |    |    |    |    |    |    |    |   |   |   |                  |                      |   |   |   |   | T | G | Chr1:286055591-286055613 | 0.00                 |        |
| 11   | 2                        | 1     |          |    |    |    |    |    |    |    | G  |    |    |   | c |   |                  |                      |   |   | A | G | A |   | Chr8:86546577-86546599   | 0.00                 |        |
| 12   | 2                        | 1     |          |    |    |    |    |    |    |    | G  |    |    |   | c |   |                  |                      |   |   | A | G | A |   | Chr1:76398359-76398381   | 0.00                 |        |
| 13   | 2                        | 1     |          |    |    |    |    |    |    |    | G  |    |    |   | c |   | A                |                      |   |   |   | G | A |   | Chr10:64318847-64318869  | 0.00                 |        |
| 14   | 2                        | 1     |          |    |    |    |    |    |    |    | G  |    |    |   | c |   |                  |                      |   |   | A | G | A |   | Chr8:86529185-86529207   | 0.00                 |        |
| 15   | 2                        | 1     |          |    |    |    |    |    |    |    | G  |    |    |   | c |   |                  |                      |   |   | A | G | A |   | Chr5:93800999-93801021   | 0.00                 |        |

**Supplementary Table 3.** CLEAVE-seq data and a shortlist of computationally predicted M2 sites. On-target site is shown on the top. DNA and RNA Bulges are shown as gray and black boxes, respectively. Mismatches are shown in color boxes.

| Site | Computational prediction |       | Sequence |    |    |    |    |    |    |    |    |    |    |   |   |   |   |   |   |   |   |   | Genomic Location | Avg CLEAVE-Seq Reads |   |                           |        |
|------|--------------------------|-------|----------|----|----|----|----|----|----|----|----|----|----|---|---|---|---|---|---|---|---|---|------------------|----------------------|---|---------------------------|--------|
|      | Mismatch                 | Bulge | 20       | 19 | 18 | 17 | 16 | 15 | 14 | 13 | 12 | 11 | 10 | 9 | 8 | 7 | 6 | 5 | 4 | 3 | 2 | 1 |                  |                      | 0 | -1                        | -2     |
| 1    | 0                        | 0     | G        | G  | C  | C  | G  | A  | G  | G  | T  | C  | G  | A | C | T | A | C | C | G | G | C | C                | G                    | G | Chr9:143631773-143631796  | 227.16 |
| 2    | 2                        | 1     |          |    | c  |    | C  |    | T  |    |    |    |    |   |   |   |   |   |   |   |   |   |                  | A                    |   | Chr2:37363776-37363799    | 14.68  |
| 3    | 1                        | 1     |          |    |    |    |    |    |    |    | G  |    |    |   |   |   |   |   |   |   |   |   |                  | A                    |   | Chr3:200475375-200475398  | 48.43  |
| 4    | 2                        | 1     |          |    |    |    | C  |    |    |    | G  |    |    |   |   |   |   |   |   |   |   |   |                  | A                    |   | Chr10:5286571-5286594     | 111.10 |
| 5    | 2                        | 1     |          |    | G  |    |    |    |    |    | G  |    |    |   |   | g |   |   |   |   |   |   |                  | C                    |   | Chr5:139807793-139807816  | 3.50   |
| 6    | 2                        | 1     |          |    |    |    |    |    |    |    | G  |    |    |   | G |   |   |   |   |   |   |   |                  | A                    |   | Chr5:196093089-196093112  | 0.00   |
| 7    | 1                        | 1     |          |    |    | A  |    |    |    |    |    |    |    |   |   |   |   |   |   |   |   |   |                  | G                    |   | Chr6:166308906-166308929  | 12.21  |
| 8    | 2                        | 1     |          |    | A  |    |    |    |    |    |    |    |    |   |   | T |   |   |   |   |   |   |                  | G                    |   | Chr5:219494224-219494247  | 0.00   |
| 9    | 2                        | 1     |          |    | T  |    |    |    |    |    |    |    |    |   |   |   |   |   |   |   |   |   |                  | A                    |   | Chr6:157449386-157449409  | 1.00   |
| 10   | 1                        | 1     |          |    |    |    |    |    |    |    |    |    |    |   |   |   |   |   |   |   |   |   |                  | C                    |   | Chr3:214572069-214572092  | 0.00   |
| 11   | 2                        | 1     |          |    |    |    |    |    |    |    |    |    |    |   | T |   |   |   |   |   |   |   |                  | G                    |   | Chr6:9938751-993874       | 0.00   |
| 12   | 2                        | 1     |          |    |    |    |    |    |    |    |    |    |    |   | T |   |   |   |   |   |   |   |                  | G                    |   | Chr9:3475286-3475309      | 0.00   |
| 13   | 2                        | 1     |          |    |    |    |    |    |    |    |    |    |    |   | T |   |   |   |   |   |   |   |                  | G                    |   | Chr3:218090730-218090753  | 0.00   |
| 14   | 2                        | 1     |          |    |    |    |    |    |    |    |    |    |    |   | T |   |   |   |   |   |   |   |                  | G                    |   | Chr8:80758362-80758385    | 0.00   |
| 15   | 2                        | 1     |          |    |    |    |    |    |    |    |    |    |    |   | T |   |   |   |   |   |   |   |                  | G                    |   | Chr5:16787335-16787358    | 0.00   |
| 16   | 2                        | 1     |          |    |    |    |    |    |    |    |    |    |    |   | T |   |   |   |   |   |   |   |                  | G                    |   | Chr5:174188899-174188922  | 0.00   |
| 17   | 2                        | 1     |          |    |    |    |    |    |    |    |    |    |    |   | T |   |   |   |   |   |   |   |                  | G                    |   | Chr4:17679359-17679382    | 0.00   |
| 18   | 2                        | 1     |          |    |    |    |    |    |    |    |    |    |    |   | T |   |   |   |   |   |   |   |                  | G                    |   | Chr3:174183068-174183091  | 0.00   |
| 19   | 2                        | 1     |          |    |    |    |    |    |    |    |    |    |    |   | T |   |   |   |   |   |   |   |                  | G                    |   | Chr9:16372961-16372984    | 0.00   |
| 20   | 2                        | 1     |          |    |    | G  |    |    |    |    |    |    |    |   | T |   |   |   |   |   |   |   |                  | T                    |   | Chr6:35449294-35449317    | 0.00   |
| 21   | 2                        | 1     | C        |    |    |    |    |    |    |    |    |    |    |   | g |   |   |   |   |   |   |   |                  | C                    |   | Chr2:48116260-48116283    | 0.00   |
| 22   | 2                        | 1     | C        |    |    |    |    |    |    |    |    |    |    |   | g |   | T |   |   |   |   |   |                  | C                    |   | Chr10:120428313-120428336 | 0.00   |
| 23   | 2                        | 1     |          |    |    |    |    |    |    |    |    |    |    |   | T |   |   |   |   |   |   |   |                  | G                    |   | Chr9:78374914-78374937    | 0.00   |
| 24   | 2                        | 1     |          |    |    |    |    |    |    |    |    |    |    |   | T |   |   |   |   |   |   |   |                  | G                    |   | Chr6:40580933-40580956    | 0.00   |
| 25   | 2                        | 1     |          |    |    |    |    |    |    |    |    |    |    |   | T |   |   |   |   |   |   |   |                  | G                    |   | Chr1:57503045-57503068    | 0.00   |
| 26   | 2                        | 1     |          |    |    |    |    |    |    |    |    |    |    |   | T |   |   |   |   |   |   |   |                  | G                    |   | Chr3:216792332-216792355  | 0.00   |
| 27   | 2                        | 1     |          |    |    |    |    |    |    |    |    |    |    |   | T |   |   |   |   |   |   |   |                  | G                    |   | Chr8:138192658-138192681  | 0.00   |
| 28   | 2                        | 1     |          |    |    |    |    |    |    |    |    |    |    |   | T |   |   |   |   |   |   |   |                  | G                    |   | Chr10:117146380-117146403 | 0.00   |
| 29   | 2                        | 1     |          |    |    |    |    |    |    |    |    |    |    |   |   |   |   |   |   |   |   |   |                  | A                    |   | Chr4:184633059-184633082  | 0.00   |
| 30   | 2                        | 1     |          |    |    |    |    |    |    |    |    |    |    |   |   |   |   |   |   |   |   |   |                  | G                    |   | Chr8:123353866-123353889  | 0.00   |
| 31   | 2                        | 1     |          |    |    |    |    |    |    |    |    |    |    |   |   |   |   |   |   |   |   |   |                  | G                    |   | Chr4:46962972-46962995    | 0.00   |
| 32   | 2                        | 1     |          |    |    |    |    |    |    |    |    |    |    |   |   |   |   |   |   |   |   |   |                  | G                    |   | Chr4:46981868-46981891    | 0.00   |
| 33   | 2                        | 1     |          |    |    |    |    |    |    |    |    |    |    |   |   |   |   |   |   |   |   |   |                  | G                    |   | Chr1:130948589-130948612  | 0.00   |
| 34   | 2                        | 1     |          |    |    |    |    |    |    |    |    |    |    |   |   |   |   |   |   |   |   |   |                  | G                    |   | Chr8:101460540-101460563  | 0.00   |
| 35   | 2                        | 1     |          |    |    |    |    |    |    |    |    |    |    |   |   |   |   |   |   |   |   |   |                  | G                    |   | Chr10:38760703-38760726   | 0.00   |
| 36   | 2                        | 1     |          |    |    |    |    |    |    |    |    |    |    |   |   |   |   |   |   |   |   |   |                  | G                    |   | Chr10:38770324-38770347   | 0.00   |
| 37   | 2                        | 1     |          |    |    |    |    |    |    |    |    |    |    |   |   |   |   |   |   |   |   |   |                  | A                    |   | Chr5:218532749-218532772  | 0.00   |
| 38   | 2                        | 1     |          |    |    |    |    |    |    |    |    |    |    |   |   |   |   |   |   |   |   |   |                  | A                    |   | Chr5:218542334-218542357  | 0.00   |
| 39   | 2                        | 1     |          |    |    |    |    |    |    |    |    |    |    |   |   |   |   |   |   |   |   |   |                  | G                    |   | Chr10:83019302-83019325   | 0.00   |
| 40   | 2                        | 1     |          |    |    |    |    |    |    |    |    |    |    |   |   |   |   |   |   |   |   |   |                  | T                    |   | Chr3:5743937-5743960      | 0.00   |
| 41   | 2                        | 1     |          |    |    |    |    |    |    |    |    |    |    |   |   |   |   |   |   |   |   |   |                  | G                    |   | Chr9:63992902-63992925    | 0.00   |
| 42   | 2                        | 1     |          |    |    |    |    |    |    |    |    |    |    |   |   |   |   |   |   |   |   |   |                  | G                    |   | Chr9:57340264-57340287    | 0.00   |
| 43   | 2                        | 1     |          |    |    |    |    |    |    |    |    |    |    |   |   |   |   |   |   |   |   |   |                  | T                    |   | Chr4:146163129-146163152  | 0.00   |
| 44   | 2                        | 1     |          |    |    |    |    |    |    |    |    |    |    |   |   |   |   |   |   |   |   |   |                  | T                    |   | Chr2:213478153-213478176  | 0.00   |
| 45   | 2                        | 1     |          |    |    |    |    |    |    |    |    |    |    |   |   |   |   |   |   |   |   |   |                  | A                    |   | Chr5:223273918-223273940  | 2.38   |
| 46   | 2                        | 1     |          |    |    |    |    |    |    |    |    |    |    |   |   |   |   |   |   |   |   |   |                  | C                    | A | Chr1:137725782-137725804  | 0.00   |
| 47   | 2                        | 1     |          |    |    |    |    |    |    |    |    |    |    |   |   |   |   |   |   |   |   |   |                  | G                    | A | Chr1:159151911-159151933  | 0.00   |
| 48   | 2                        | 1     |          |    |    |    |    |    |    |    |    |    |    |   |   |   |   |   |   |   |   |   |                  | G                    | A | Chr1:199634954-199634976  | 0.00   |
| 49   | 2                        | 1     |          |    |    |    |    |    |    |    |    |    |    |   |   |   |   |   |   |   |   |   |                  | G                    | A | Chr1:232879291-232879313  | 0.00   |
| 50   | 2                        | 0     |          |    |    |    |    |    |    |    |    |    |    |   |   |   |   |   |   |   |   |   |                  | G                    | A | Chr1:304501362-304501384  | 0.00   |
| 51   | 2                        | 0     |          |    |    |    |    |    |    |    |    |    |    |   |   |   |   |   |   |   |   |   |                  | A                    | C | Chr2:75055786-75055808    | 0.00   |
| 52   | 2                        | 0     |          |    |    |    |    |    |    |    |    |    |    |   |   |   |   |   |   |   |   |   |                  | G                    | A | Chr3:145198993-145199015  | 0.00   |
| 53   | 2                        | 1     |          |    |    | G  |    |    |    |    |    |    |    |   | c |   |   |   |   |   |   |   |                  | G                    | A | Chr4:79878295-79878317    | 0.00   |
| 54   | 2                        | 1     |          |    |    |    |    |    |    |    |    |    |    |   |   |   |   |   |   |   |   |   |                  | A                    |   | Chr5:2689067-2689089      | 0.00   |
| 55   | 2                        | 1     |          |    |    | G  |    |    |    |    |    |    |    |   |   |   |   |   |   |   |   |   |                  | G                    | A | Chr5:110101791-110101813  | 0.00   |
| 56   | 2                        | 1     |          |    |    | G  |    |    |    |    |    |    |    |   |   |   |   |   |   |   |   |   |                  | G                    | A | Chr5:110111414-110111436  | 0.00   |
| 57   | 2                        | 1     |          |    |    |    |    |    |    |    |    |    |    |   |   |   |   |   |   |   |   |   |                  | T                    | A | Chr5:126305549-126305571  | 0.00   |
| 58   | 2                        | 0     |          |    |    |    |    |    |    |    |    |    |    |   |   |   |   |   |   |   |   |   |                  | G                    | A | Chr6:125674373-125674395  | 0.00   |
| 59   | 2                        | 1     |          |    |    |    |    |    |    |    |    |    |    |   |   |   |   |   |   |   |   |   |                  | G                    | A | Chr7:124810038-124810060  | 39.49  |
| 60   | 2                        | 1     |          |    |    | G  |    |    |    |    |    |    |    |   |   |   |   |   |   |   |   |   |                  | G                    | A | Chr8:15761268-15761290    | 0.00   |
| 61   | 2                        | 1     |          |    |    | G  |    |    |    |    |    |    |    |   |   |   |   |   |   |   |   |   |                  | G                    | A | Chr8:15770931-15770953    | 0.00   |
| 62   | 2                        | 1     |          |    |    |    |    |    |    |    |    |    |    |   |   |   |   |   |   |   |   |   |                  | T                    | A | Chr8:50000473-50000495    | 0.00   |
| 63   | 2                        | 1     |          |    |    |    |    |    |    |    |    |    |    |   |   |   |   |   |   |   |   |   |                  | A                    | A | Chr8:139620037-139620059  | 0.00   |
| 64   | 2                        | 1     |          |    |    |    |    |    |    |    |    |    |    |   |   |   |   |   |   |   |   |   |                  | A                    | A | Chr9:22064095-22064117    | 0.00   |
| 65   | 2                        | 1     |          |    |    | T  |    |    |    |    |    |    |    |   |   |   |   |   |   |   |   |   |                  | T                    | A | Chr9:59915238-59915260    | 0.00   |
| 66   | 2                        | 0     |          |    |    |    |    |    |    |    |    |    |    |   |   |   |   |   |   |   |   |   |                  | G                    | A | Chr9:159463178-159463200  | 0.00   |

**Supplementary Table 5.** CLEAVE-seq data and a shortlist of computationally predicted high ranked M2 sites with low number of mismatches and bulges. On-target site is shown on the top. RNA Bulges are shown as boxes, respectively. Mismatches are shown in color boxes.

| Site | Computational prediction |       | CLEAVE-Seq<br>reads<br>100nM | Sequence |    |    |    |    |    |    |    |    |    |    |   |   |   |   |   |   |   |   |   | Genomic Location |   |    |                          |
|------|--------------------------|-------|------------------------------|----------|----|----|----|----|----|----|----|----|----|----|---|---|---|---|---|---|---|---|---|------------------|---|----|--------------------------|
|      | Mismatch                 | Bulge |                              | 20       | 19 | 18 | 17 | 16 | 15 | 14 | 13 | 12 | 11 | 10 | 9 | 8 | 7 | 6 | 5 | 4 | 3 | 2 | 1 |                  | 0 | -1 | -2                       |
| 1    | 0                        | 0     | 227                          | G        | G  | C  | C  | G  | A  | G  | G  | T  | C  | G  | A | C | T | A | C | C | G | G | C | C                | G | G  | Chr9:143631773-143631795 |
| 2    | 1                        | 1     | 0                            |          |    |    |    |    |    |    |    |    |    |    |   |   |   |   |   |   |   |   |   |                  |   |    | Chr3:214572069-214572090 |
| 3    | 2                        | 1     | 0                            |          |    |    |    |    |    |    |    |    |    |    |   |   |   |   |   |   |   |   |   |                  |   |    | Chr3:216792332-216792353 |
| 4    | 2                        | 1     | 0                            |          |    |    |    |    |    |    |    |    |    |    |   |   |   |   |   |   |   |   |   |                  |   |    | Chr5:196093089-196093111 |
| 5    | 2                        | 1     | 0                            |          |    |    |    |    |    |    |    |    |    |    |   |   |   |   |   |   |   |   |   |                  |   |    | Chr5:219494224-219494245 |
| 6    | 2                        | 2     | 0                            |          |    |    |    |    |    |    |    |    |    |    |   |   |   |   |   |   |   |   |   |                  |   |    | Chr7:116040382-116040402 |
| 7    | 3                        | 0     | 0                            |          |    |    |    |    |    |    |    |    |    |    |   |   |   |   |   |   |   |   |   |                  |   |    | Chr4:173200547-173200569 |

Supplementary Table 6. CLEAVE-seq data and a shortlist of M2 sites validated using MPIS. On-target site is shown on the top. DNA and RNA bulges are shown as gray and black boxes, respectively. Mismatches are shown in color boxes.

| Site     | Computational prediction | Sequence                                                   | Genomic Location          | Predicted by Cas-Offinder | Identified in CLEAVE-Seq | Avg Normalized CLEAVE-Seq Read Count |
|----------|--------------------------|------------------------------------------------------------|---------------------------|---------------------------|--------------------------|--------------------------------------|
| Mismatch | Bulge                    | 20 19 18 17 16 15 14 13 12 11 10 9 8 7 6 5 4 3 2 1 0 -1 -2 |                           |                           |                          |                                      |
| 1        | 0                        | G G C C G A G G T C G A C T A C C G G C C G G              | Chr5:143631773-143631795  | Yes                       | Yes                      | 227.16                               |
| 2        | 1                        | A                                                          | Chr3:200475375-200475397  | Yes                       | Yes                      | 48.43                                |
| 3        | 1                        | A                                                          | Chr16:160308066-160308077 | Yes                       | Yes                      | 12.21                                |
| 4        | 1                        | A                                                          | Chr5:214572069-214572090  | Yes                       | No                       | 0.00                                 |
| 5        | 2                        | C G                                                        | Chr10:5286571-5286593     | Yes                       | Yes                      | 111.10                               |
| 6        | 2                        | T                                                          | Chr6:157449386-157449407  | Yes                       | Yes                      | 1.00                                 |
| 7        | 2                        | T                                                          | Chr3:216792332-216792353  | Yes                       | No                       | 0.00                                 |
| 8        | 2                        | A                                                          | Chr5:1960309-19603111     | Yes                       | No                       | 0.00                                 |
| 9        | 2                        | A                                                          | Chr5:219494224-219494245  | Yes                       | No                       | 0.00                                 |
| 10       | 2                        | T                                                          | Chr5:37860732-37860754    | Yes                       | Yes                      | 529.17                               |
| 11       | 2                        | T                                                          | Chr7:116040382-116040402  | Yes                       | No                       | 0.00                                 |
| 12       | 3                        | C                                                          | Chr5:173205547-173205569  | Yes                       | No                       | 0.00                                 |
| 13       | 3                        | G                                                          | Chr1:5942859-5942881      | Yes                       | Yes                      | 4.41                                 |
| 14       | 3                        | A                                                          | Chr10:39633639-39633661   | Yes                       | Yes                      | 1.00                                 |
| 15       | 3                        | A                                                          | Chr2:103727824-103727845  | Yes                       | No                       | 0.00                                 |
| 16       | 3                        | A                                                          | Chr3:54133373-54133396    | Yes                       | No                       | 0.00                                 |
| 17       | 3                        | A                                                          | Chr6:2837389-28373921     | Yes                       | No                       | 0.00                                 |
| 18       | 3                        | A                                                          | Chr7:17322468-17322490    | Yes                       | Yes                      | 11.29                                |
| 19       | 4                        | C                                                          | Chr3:54313532-54313554    | Yes                       | No                       | 0.00                                 |
| 20       | 4                        | A                                                          | Chr1:168558804-168558826  | Yes                       | Yes                      | 3.31                                 |
| 21       | 4                        | A                                                          | Chr10:84440789-84440811   | Yes                       | Yes                      | 16.42                                |
| 22       | 4                        | A                                                          | Chr4:23308295-23308317    | Yes                       | Yes                      | 1.00                                 |
| 23       | 4                        | T                                                          | Chr5:6293703-6293726      | Yes                       | Yes                      | 1.55                                 |
| 24       | 4                        | T                                                          | Chr5:82350877-82350899    | Yes                       | Yes                      | 2.93                                 |
| 25       | 4                        | C                                                          | Chr1:141609726-141609748  | Yes                       | No                       | 0.00                                 |
| 26       | 4                        | A                                                          | Chr3:141619342-141619364  | Yes                       | No                       | 0.00                                 |
| 27       | 4                        | A                                                          | Chr1:89052551-89052573    | Yes                       | No                       | 0.00                                 |
| 28       | 4                        | A                                                          | Chr10:51974012-51974034   | Yes                       | No                       | 0.00                                 |
| 29       | 4                        | A                                                          | Chr2:19426157-19426179    | Yes                       | No                       | 0.00                                 |
| 30       | 4                        | A                                                          | Chr2:36174928-36174950    | Yes                       | No                       | 0.00                                 |
| 31       | 4                        | A                                                          | Chr2:81561640-81561662    | Yes                       | No                       | 0.00                                 |
| 32       | 4                        | A                                                          | Chr3:199671651-199671673  | Yes                       | No                       | 0.00                                 |
| 33       | 4                        | A                                                          | Chr3:222638047-222638069  | Yes                       | No                       | 0.00                                 |
| 34       | 4                        | A                                                          | Chr5:40664611-40664633    | Yes                       | No                       | 0.00                                 |
| 35       | 4                        | A                                                          | Chr6:14459472-14459495    | Yes                       | No                       | 0.00                                 |
| 36       | 4                        | A                                                          | Chr7:15742994-15743016    | Yes                       | No                       | 0.00                                 |
| 37       | 4                        | A                                                          | Chr7:159564951-159564973  | Yes                       | No                       | 0.00                                 |
| 38       | 4                        | A                                                          | Chr3:168788394-168788416  | Yes                       | Yes                      | 2.48                                 |
| 39       | 4                        | A                                                          | Chr7:79262098-79262121    | Yes                       | No                       | 0.00                                 |
| 40       | 5                        | A                                                          | Chr2:80849503-80849526    | Yes                       | Yes                      | 10.71                                |
| 41       | 5                        | A                                                          | Chr2:197687616-197687638  | Yes                       | Yes                      | 8.58                                 |
| 42       | 5                        | A                                                          | Chr1:124111388-124111410  | Yes                       | Yes                      | 2.48                                 |
| 43       | 5                        | A                                                          | Chr0:4325171-4325193      | Yes                       | Yes                      | 2.48                                 |
| 44       | 5                        | A                                                          | Chr1:101163004-101163026  | Yes                       | No                       | 0.00                                 |
| 45       | 5                        | A                                                          | Chr1:104009578-104001000  | Yes                       | No                       | 0.00                                 |
| 46       | 5                        | A                                                          | Chr1:116342621-116342683  | Yes                       | No                       | 0.00                                 |
| 47       | 5                        | A                                                          | Chr1:203782886-203782908  | Yes                       | No                       | 0.00                                 |
| 48       | 5                        | A                                                          | Chr1:92500285-92500287    | Yes                       | No                       | 0.00                                 |
| 49       | 5                        | A                                                          | Chr10:4860235-4860237     | Yes                       | No                       | 0.00                                 |
| 50       | 5                        | A                                                          | Chr10:88386224-88386246   | Yes                       | No                       | 0.00                                 |
| 51       | 5                        | A                                                          | Chr2:23987967-23987969    | Yes                       | No                       | 0.00                                 |
| 52       | 5                        | A                                                          | Chr2:38715655-38715677    | Yes                       | No                       | 0.00                                 |
| 53       | 5                        | A                                                          | Chr2:75127387-75127419    | Yes                       | No                       | 0.00                                 |
| 54       | 5                        | A                                                          | Chr3:107702653-107702675  | Yes                       | No                       | 0.00                                 |
| 55       | 5                        | A                                                          | Chr3:111193547-111193569  | Yes                       | No                       | 0.00                                 |
| 56       | 5                        | A                                                          | Chr4:131687629-131687651  | Yes                       | No                       | 0.00                                 |
| 57       | 5                        | A                                                          | Chr4:9693284-96932066     | Yes                       | No                       | 0.00                                 |
| 58       | 5                        | A                                                          | Chr5:29439883-29439905    | Yes                       | No                       | 0.00                                 |
| 59       | 5                        | A                                                          | Chr5:39014962-39014984    | Yes                       | No                       | 0.00                                 |
| 60       | 5                        | A                                                          | Chr5:47203908-47203930    | Yes                       | No                       | 0.00                                 |
| 61       | 5                        | A                                                          | Chr5:60919606-60919628    | Yes                       | No                       | 0.00                                 |
| 62       | 5                        | A                                                          | Chr5:75784576-75784598    | Yes                       | No                       | 0.00                                 |
| 63       | 5                        | A                                                          | Chr7:24866766-24866788    | Yes                       | No                       | 0.00                                 |
| 64       | 5                        | A                                                          | Chr7:8090624-8090646      | Yes                       | No                       | 0.00                                 |
| 65       | 5                        | A                                                          | Chr8:160311153-160311175  | Yes                       | No                       | 0.00                                 |
| 66       | 5                        | A                                                          | Chr8:25573743-25573765    | Yes                       | No                       | 0.00                                 |
| 67       | 5                        | A                                                          | Chr8:56849565-56849587    | Yes                       | No                       | 0.00                                 |
| 68       | 5                        | A                                                          | Chr2:4533382-4533404      | Yes                       | Yes                      | 0.00                                 |
| 69       | 5                        | A                                                          | Chr1:247722181-247722203  | Yes                       | Yes                      | 4.68                                 |
| 70       | 5                        | A                                                          | Chr8:78781894-78781916    | Yes                       | Yes                      | 1.33                                 |
| 71       | 5                        | A                                                          | Chr1:124001644-124001671  | Yes                       | No                       | 0.00                                 |
| 72       | 5                        | A                                                          | Chr3:175146550-175146572  | Yes                       | No                       | 0.00                                 |
| 73       | 5                        | A                                                          | Chr1:180655201-180655223  | Yes                       | No                       | 0.00                                 |
| 74       | 5                        | A                                                          | Chr1:21083695-21083717    | Yes                       | No                       | 0.00                                 |
| 75       | 5                        | A                                                          | Chr1:5273647-5273669      | Yes                       | No                       | 0.00                                 |
| 76       | 5                        | A                                                          | Chr1:7359301-7359323      | Yes                       | No                       | 0.00                                 |
| 77       | 5                        | A                                                          | Chr10:37395498-37395520   | Yes                       | No                       | 0.00                                 |
| 78       | 5                        | A                                                          | Chr10:75750456-75750478   | Yes                       | No                       | 0.00                                 |
| 79       | 5                        | A                                                          | Chr2:8117011-81171033     | Yes                       | No                       | 0.00                                 |
| 80       | 5                        | A                                                          | Chr2:82344809-82344831    | Yes                       | No                       | 0.00                                 |
| 81       | 5                        | A                                                          | Chr2:84402863-84402885    | Yes                       | No                       | 0.00                                 |
| 82       | 5                        | A                                                          | Chr3:16052720-16052742    | Yes                       | No                       | 0.00                                 |
| 83       | 5                        | A                                                          | Chr4:26448021-26448043    | Yes                       | No                       | 0.00                                 |
| 84       | 5                        | A                                                          | Chr4:35475536-35475558    | Yes                       | No                       | 0.00                                 |
| 85       | 5                        | A                                                          | Chr4:72754228-72754250    | Yes                       | No                       | 0.00                                 |
| 86       | 5                        | A                                                          | Chr5:112910662-112910684  | Yes                       | No                       | 0.00                                 |
| 87       | 5                        | A                                                          | Chr5:141546929-141546951  | Yes                       | No                       | 0.00                                 |
| 88       | 5                        | A                                                          | Chr5:189221660-189221682  | Yes                       | No                       | 0.00                                 |
| 89       | 5                        | A                                                          | Chr5:205487171-205487193  | Yes                       | No                       | 0.00                                 |
| 90       | 5                        | A                                                          | Chr5:41228760-41228782    | Yes                       | No                       | 0.00                                 |
| 91       | 5                        | A                                                          | Chr6:167702031-167702053  | Yes                       | No                       | 0.00                                 |
| 92       | 5                        | A                                                          | Chr6:82650049-82650071    | Yes                       | No                       | 0.00                                 |
| 93       | 5                        | A                                                          | Chr8:146121378-146121400  | Yes                       | No                       | 0.00                                 |
| 94       | 5                        | A                                                          | Chr8:157442865-157442887  | Yes                       | No                       | 0.00                                 |
| 95       | 5                        | A                                                          | Chr8:79384412-79384434    | Yes                       | No                       | 0.00                                 |
| 96       | 5                        | A                                                          | Chr7:124810037-124810059  | Yes                       | No                       | 0.00                                 |

**Supplementary Table 7.** MIPS genotyping of 390 T<sub>0</sub> maize plants generated from three different target sites and delivery methods. Any allele, mutant or WT represent >5% of total reads to be called an allele. Percent mutant alleles indicate total mutant alleles/total alleles from plants analyzed. Mosaic plants contain >2 alleles. Homozygous mutant plants contain single mutant allele with >90% reads

| Target Site | Transformation Method | Number of Plants Analyzed | Percent Mutant Alleles | Mosaic Plants | Homozygous WT Plants | Homozygous Mutant Plants | Heterozygous Mut/Mut Plants | Heterozygous WT/Mut Plants |
|-------------|-----------------------|---------------------------|------------------------|---------------|----------------------|--------------------------|-----------------------------|----------------------------|
| M1          | Agro                  | 26                        | 61.30%                 | 0.00%         | 46.20%               | 34.60%                   | 19.20%                      | 0.00%                      |
| M2          | DNA-particle gun      | 112                       | 95.90%                 | 8.10%         | 5.20%                | 34.90%                   | 45.90%                      | 5.80%                      |
|             | Agro                  | 117                       | 99.00%                 | 9.30%         | 0.00%                | 49.20%                   | 39.80%                      | 1.70%                      |
|             | RNP-particle gun      | 94                        | 33.30%                 | 0.00%         | 61.50%               | 15.40%                   | 15.40%                      | 7.70%                      |
| M3          | Agro                  | 41                        | 94.30%                 | 5.60%         | 8.30%                | 55.60%                   | 30.60%                      | 0.00%                      |
