# Supplementary material for: CRISPR-Cas9 Editing in Maize: Systematic Evaluation of Off-target Activity and Its Relevance in Crop Improvement
Source: PubMed Central journal article supplement (PMC6491584; doi:10.1038/s41598-019-43141-6), 2019-04-30
Supplement: 41598_2019_43141_MOESM4_ESM.pdf [file 41598_2019_43141_MOESM4_ESM.pdf]

## Supplementary information

### CRISPR-Cas9 Editing in Maize: Systematic Evaluation of Off-target Activity and Its Relevance in Crop Improvement

Joshua Young<sup>1†</sup>, Gina Zastrow-Hayes<sup>1†</sup>, Stéphane Deschamps<sup>1†</sup>, Sergei Svitashv<sup>1</sup>, Mindaugas Zaremba<sup>2</sup>, Ananta Acharya<sup>1</sup>, Sushmitha Paulraj<sup>1</sup>, Brooke Peterson-Burch<sup>1</sup>, Chris Schwartz<sup>1</sup>, Vesna Djukanovic<sup>1</sup>, Brian Lenderts<sup>1</sup>, Lanie Feigenbutz<sup>1</sup>, Lijuan Wang<sup>1</sup>, Clara Alarcon<sup>1</sup>, Virginijus Siksnys<sup>2</sup>, Gregory May<sup>1</sup>, Doane Chilcoat<sup>1</sup>, Sandeep Kumar<sup>1\*</sup>

<sup>1</sup>Corteva Agriscience™, Agriculture Division of DowDuPont™, Johnston, IA 50131, USA

<sup>2</sup>Institute of Biotechnology, Vilnius University, Vilnius, LT-10257, Lithuania

\*Corresponding author [sandeep.kumar@corteva.com](mailto:sandeep.kumar@corteva.com)

†These authors contributed equally to this work

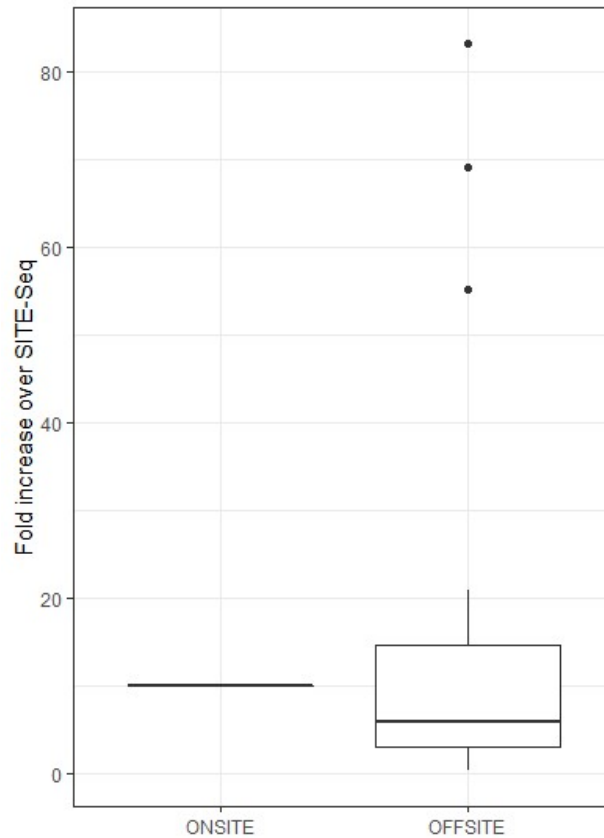

**Supplementary Figure 1.** Comparison between CLEAVE-Seq and SITE-seq. Box and whisker plot of the fold difference in read coverage between the collection of on- and off-target sites recovered using CLEAVE-Seq and SITE-Seq. The M4 target site, GGCGGCGGCGAGGTAGTGCGAGG (PAM in blue font), located within the *liguleless 1* gene (Chr2:4233973-4233995 (AGPv4)) was used in the comparison. Two CLEAVE-Seq technical replicates and one control SITE-Seq replicate were processed, using protocols described here for CLEAVE-Seq (see Materials & Methods), and as previously described for SITE-Seq by Cameron *et al.* 2017<sup>28</sup>. Following library construction, sequencing was performed for all three samples on an Illumina HiSeq2500, and data were analyzed using the CLEAVE-Seq analytical approach described in the Materials & Methods. Results demonstrate that CLEAVE-Seq libraries provide an enhanced recovery at on- and off-sites relative to SITE-Seq, ~10-fold for the on-target and ~7-fold for the off-targets.

**A**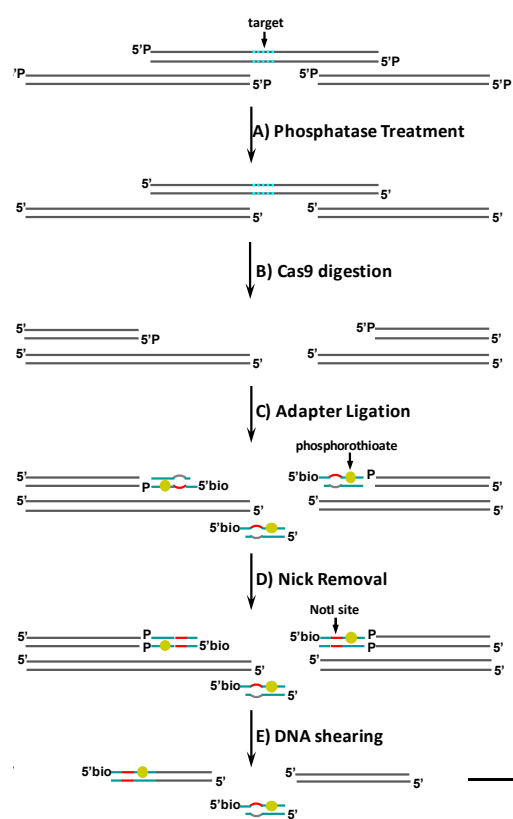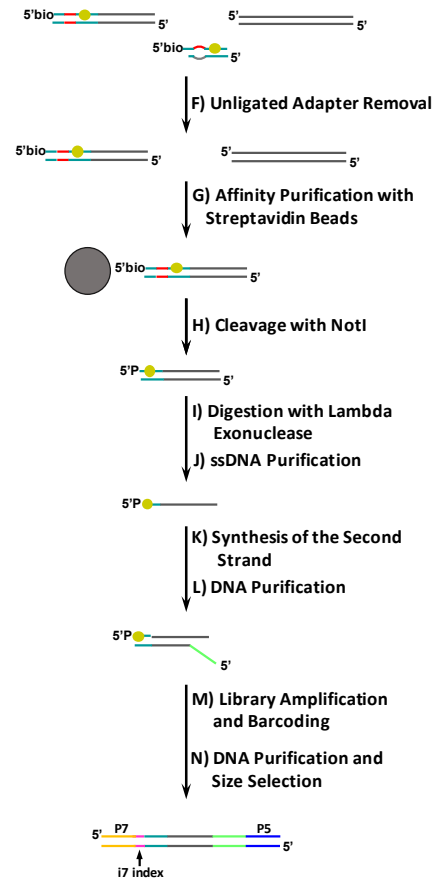**B**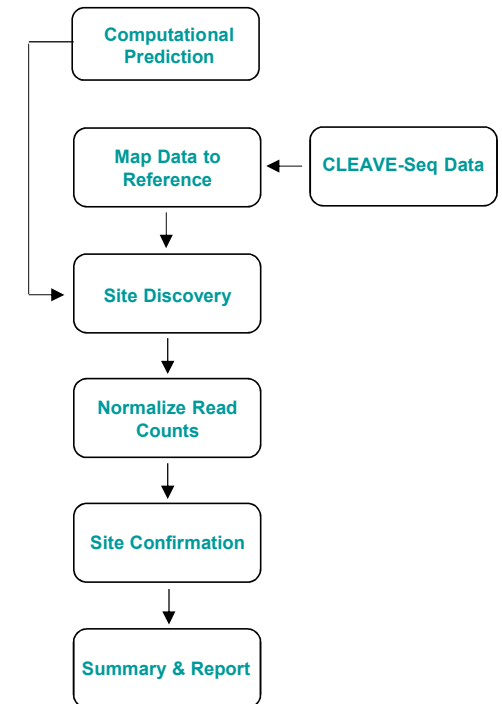

**Supplementary Figure 2. A)** Schematic of CLEAVE-Seq method. First, purified genomic DNA is dephosphorylated to reduce the number of free genomic DNA ends not generated by Cas9. Then, unphosphorylated adapters conjugated to biotin are used to capture Cas9 cleavage sites. Next, DNA fragment length is reduced and Cas9 cleaved fragments are enriched for by Streptavidin affinity purification. Finally, indexed libraries are generated for deep sequencing. **B)** Flow chart of target discovery informatics. First, computational prediction (e.g. Cas-OFFinder (Bae, Park et al. 2014) is used to identify putative genomic target sites. Next, CLEAVE-Seq data is combined with computation predictions to identify biochemically cleaved on- and off-target sites. The read count for each site is then normalized based on total read depth and confirmed as being unique to the Cas9 treated sample by comparisons to the control (reactions assembled in the absence of a guide RNA).

**Supplementary Table 1.** A shortlist of computationally predicted M1 sites. On-target site is shown on the top. DNA and RNA Bulges are shown as gray and black boxes, respectively. Mismatches are shown in color boxes.

| Site | Computational prediction |       | Sequence |    |    |    |    |    |    |    |    |    |    |    |   |   |   |   |   |   |   | Genomic Location | Avg CLEAVE-Seq Reads |   |   |   |                           |        |
|------|--------------------------|-------|----------|----|----|----|----|----|----|----|----|----|----|----|---|---|---|---|---|---|---|------------------|----------------------|---|---|---|---------------------------|--------|
|      | Mismatch                 | Bulge | 21       | 20 | 19 | 18 | 17 | 16 | 15 | 14 | 13 | 12 | 11 | 10 | 9 | 8 | 7 | 6 | 5 | 4 | 3 |                  |                      | 2 | 1 | 0 | -1                        | -2     |
|      | 0                        | 0     | G        | C  | A  | C  | G  | T  | A  | C  | G  | T  | C  | A  | C | C | A | T | C | C | C | G                | C                    | C | G | G | Chr1:14702765-14702788    | 200.78 |
| 1    | 2                        | 1     |          |    |    |    |    |    |    |    |    |    |    |    |   |   |   |   |   |   |   |                  |                      |   |   |   | Chr7:16502824-16502847    | 0.78   |
| 2    | 2                        | 1     |          |    |    |    |    |    |    |    |    |    |    |    |   |   |   |   |   |   |   |                  |                      |   |   |   | Chr3:12444708-12444731    | 0.00   |
| 3    | 2                        | 1     |          |    |    |    |    |    |    |    |    |    |    |    |   |   |   |   |   |   |   |                  |                      |   |   |   | Chr1:54992863-54992886    | 0.00   |
| 4    | 2                        | 1     |          |    |    |    |    |    |    |    |    |    |    |    |   |   |   |   |   |   |   |                  |                      |   |   |   | Chr8:38361070-38361093    | 1.41   |
| 5    | 2                        | 1     |          |    |    |    |    |    |    |    |    |    |    |    |   |   |   |   |   |   |   |                  |                      |   |   |   | Chr8:73407823-73407846    | 0.00   |
| 6    | 2                        | 1     |          |    |    |    |    |    |    |    |    |    |    |    |   |   |   |   |   |   |   |                  |                      |   |   |   | Chr10:26835370-26835393   | 1.46   |
| 7    | 2                        | 1     |          |    |    |    |    |    |    |    |    |    |    |    |   |   |   |   |   |   |   |                  |                      |   |   |   | Chr10:26867320-26867343   | 0.00   |
| 8    | 2                        | 1     |          |    |    |    |    |    |    |    |    |    |    |    |   |   |   |   |   |   |   |                  |                      |   |   |   | Chr10:142898890-142898913 | 0.21   |
| 9    | 2                        | 1     |          |    |    |    |    |    |    |    |    |    |    |    |   |   |   |   |   |   |   |                  |                      |   |   |   | Chr7:5753958-5753981      | 3.02   |
| 10   | 2                        | 1     |          |    |    |    |    |    |    |    |    |    |    |    |   |   |   |   |   |   |   |                  |                      |   |   |   | Chr7:156486399-156486422  | 3.02   |
| 11   | 2                        | 1     |          |    |    |    |    |    |    |    |    |    |    |    |   |   |   |   |   |   |   |                  |                      |   |   |   | Chr5:182622499-182622522  | 0.00   |
| 12   | 2                        | 1     |          |    |    |    |    |    |    |    |    |    |    |    |   |   |   |   |   |   |   |                  |                      |   |   |   | Chr1:77630220-77630243    | 0.00   |
| 13   | 2                        | 1     |          |    |    |    |    |    |    |    |    |    |    |    |   |   |   |   |   |   |   |                  |                      |   |   |   | Chr1:84645608-84645631    | 0.00   |
| 14   | 2                        | 1     |          |    |    |    |    |    |    |    |    |    |    |    |   |   |   |   |   |   |   |                  |                      |   |   |   | Chr3:56838689-56838712    | 0.00   |
| 15   | 2                        | 1     |          |    |    |    |    |    |    |    |    |    |    |    |   |   |   |   |   |   |   |                  |                      |   |   |   | Chr2:29281983-29282006    | 0.63   |

**Supplementary Table 2.** CLEAVE-seq data and A shortlist of computationally predicted M3 sites. On-target site is shown on the top. DNA and RNA Bulges are shown as gray and black boxes, respectively. Mismatches are shown in color boxes.

| Site | Computational prediction |       | Sequence |    |    |    |    |    |    |    |    |    |    |   |   |   | Genomic Location | Avg CLEAVE-Seq Reads |   |   |   |   |   |   |                          |                      |        |
|------|--------------------------|-------|----------|----|----|----|----|----|----|----|----|----|----|---|---|---|------------------|----------------------|---|---|---|---|---|---|--------------------------|----------------------|--------|
|      | Mismatch                 | Bulge | 20       | 19 | 18 | 17 | 16 | 15 | 14 | 13 | 12 | 11 | 10 | 9 | 8 | 7 |                  |                      | 6 | 5 | 4 | 3 | 2 | 1 | 0                        | -1                   | -2     |
|      | 0                        | 0     | G        | C  | G  | G  | A  | G  | A  | C  | T  | A  | A  | G | T | G | G                | C                    | T | G | T | A | G | G | G                        | Chr2:4233941-4233964 | 164.19 |
| 1    | 2                        | 1     |          |    |    |    |    |    |    |    | A  |    |    |   |   |   |                  |                      |   |   |   | G | T |   | Chr2:172786227-172786250 | 0.00                 |        |
| 2    | 2                        | 1     |          |    |    |    |    |    |    |    |    |    |    |   |   |   | T                | A                    |   |   |   |   | A |   | Chr7:43812401-43812424   | 2.46                 |        |
| 3    | 2                        | 1     |          |    |    |    |    |    |    | C  |    |    |    |   |   |   |                  |                      |   |   |   | G | A |   | Chr2:120060642-120060665 | 0.00                 |        |
| 4    | 2                        | 1     |          |    |    |    |    |    |    |    | G  |    |    |   | c |   |                  |                      |   |   | A | G | A |   | Chr5:93791118-93791140   | 0.00                 |        |
| 5    | 2                        | 1     |          |    |    |    |    |    |    |    | G  |    |    |   | c |   |                  |                      |   |   | A | G | A |   | Chr3:196197068-196197090 | 0.00                 |        |
| 6    | 2                        | 1     |          |    |    |    |    |    |    | G  |    |    |    |   |   |   |                  |                      |   |   |   |   | G | A | Chr5:168532712-168532734 | 0.00                 |        |
| 7    | 2                        | 1     |          |    |    |    |    |    |    |    | G  |    |    |   | c |   |                  |                      |   |   | A | G | A |   | Chr7:115695254-115695276 | 0.00                 |        |
| 8    | 2                        | 1     |          |    |    |    |    |    |    |    | G  |    |    |   | c |   |                  |                      |   |   | A | G | A |   | Chr7:62777273-62777295   | 0.00                 |        |
| 9    | 2                        | 1     |          |    |    |    |    |    |    |    | G  | C  |    |   |   |   |                  |                      |   |   |   |   | G | A | Chr1:147217001-147217023 | 0.00                 |        |
| 10   | 2                        | 1     |          |    |    |    |    |    |    |    |    |    |    |   |   |   |                  |                      |   |   |   |   | T | G | Chr1:286055591-286055613 | 0.00                 |        |
| 11   | 2                        | 1     |          |    |    |    |    |    |    |    | G  |    |    |   | c |   |                  |                      |   |   |   | A | G | A | Chr8:86546577-86546599   | 0.00                 |        |
| 12   | 2                        | 1     |          |    |    |    |    |    |    |    | G  |    |    |   | c |   |                  |                      |   |   |   | A | G | A | Chr1:76398359-76398381   | 0.00                 |        |
| 13   | 2                        | 1     |          |    |    |    |    |    |    |    | G  |    |    |   | c |   |                  |                      |   |   | A | G | A |   | Chr10:64318847-64318869  | 0.00                 |        |
| 14   | 2                        | 1     |          |    |    |    |    |    |    |    | G  |    |    |   | c |   |                  |                      |   |   |   | A | G | A | Chr8:86529185-86529207   | 0.00                 |        |
| 15   | 2                        | 1     |          |    |    |    |    |    |    |    | G  |    |    |   | c |   |                  |                      |   |   |   | A | G | A | Chr5:93800999-93801021   | 0.00                 |        |

**Supplementary Table 3.** CLEAVE-seq data and a shortlist of computationally predicted M2 sites. On-target site is shown on the top. DNA and RNA Bulges are shown as gray and black boxes, respectively. Mismatches are shown in color boxes.

| Site | Computational prediction |       | Sequence |    |    |    |    |    |    |    |    |    |    |   |   |   |   |   |   |   |   |   | Genomic Location | Avg CLEAVE-Seq Reads |                           |                          |        |
|------|--------------------------|-------|----------|----|----|----|----|----|----|----|----|----|----|---|---|---|---|---|---|---|---|---|------------------|----------------------|---------------------------|--------------------------|--------|
|      | Mismatch                 | Bulge | 20       | 19 | 18 | 17 | 16 | 15 | 14 | 13 | 12 | 11 | 10 | 9 | 8 | 7 | 6 | 5 | 4 | 3 | 2 | 1 |                  |                      | 0                         | -1                       | -2     |
| 1    | 0                        | 0     | G        | G  | C  | C  | G  | A  | G  | G  | T  | C  | G  | A | C | T | A | C | C | G | G | C | C                | G                    | G                         | Chr9:143631773-143631796 | 227.16 |
| 2    | 2                        | 1     |          |    | c  |    | C  |    | T  |    |    |    |    |   |   |   |   |   |   |   |   |   | A                |                      | Chr2:37363776-37363799    | 14.68                    |        |
| 3    | 1                        | 1     |          |    |    |    |    |    |    |    | G  |    |    |   |   |   |   |   |   |   |   |   | A                |                      | Chr3:200475375-200475398  | 48.43                    |        |
| 4    | 2                        | 1     |          |    |    |    | C  |    |    |    | G  |    |    |   |   |   |   |   |   |   |   |   | A                |                      | Chr10:5286571-5286594     | 111.10                   |        |
| 5    | 2                        | 1     |          |    | G  |    |    |    |    |    | G  |    |    |   |   | g |   |   |   |   |   |   | C                |                      | Chr5:139807793-139807816  | 3.50                     |        |
| 6    | 2                        | 1     |          |    |    |    |    |    |    |    | G  |    |    |   |   | G |   |   |   |   |   |   | A                |                      | Chr5:196093089-196093112  | 0.00                     |        |
| 7    | 1                        | 1     |          |    |    |    |    |    |    |    |    |    |    |   |   |   |   |   |   |   |   |   | G                |                      | Chr6:166308906-166308929  | 12.21                    |        |
| 8    | 2                        | 1     |          |    | A  |    |    |    |    |    |    |    |    |   |   | T |   |   |   |   |   |   | G                |                      | Chr5:219494224-219494247  | 0.00                     |        |
| 9    | 2                        | 1     |          |    | T  |    |    |    |    |    |    |    |    |   |   |   |   |   |   |   |   |   | A                |                      | Chr6:157449386-157449409  | 1.00                     |        |
| 10   | 1                        | 1     |          |    |    |    |    |    |    |    |    |    |    |   |   |   |   |   |   |   |   |   | C                |                      | Chr3:214572069-214572092  | 0.00                     |        |
| 11   | 2                        | 1     |          |    |    |    |    |    |    |    |    |    |    |   |   | T |   |   |   |   |   |   | G                |                      | Chr6:9938751-9938774      | 0.00                     |        |
| 12   | 2                        | 1     |          |    |    |    |    |    |    |    |    |    |    |   |   | T |   |   |   |   |   |   | G                |                      | Chr9:3475286-3475309      | 0.00                     |        |
| 13   | 2                        | 1     |          |    |    |    |    |    |    |    |    |    |    |   |   | T |   |   |   |   |   |   | G                |                      | Chr3:218090730-218090753  | 0.00                     |        |
| 14   | 2                        | 1     |          |    |    |    |    |    |    |    |    |    |    |   |   | T |   |   |   |   |   |   | G                |                      | Chr8:80758362-80758385    | 0.00                     |        |
| 15   | 2                        | 1     |          |    |    |    |    |    |    |    |    |    |    |   |   | T |   |   |   |   |   |   | G                |                      | Chr5:16787335-16787358    | 0.00                     |        |
| 16   | 2                        | 1     |          |    |    |    |    |    |    |    |    |    |    |   |   | T |   |   |   |   |   |   | G                |                      | Chr5:174188899-174188922  | 0.00                     |        |
| 17   | 2                        | 1     |          |    |    |    |    |    |    |    |    |    |    |   |   | T |   |   |   |   |   |   | G                |                      | Chr4:17679359-17679382    | 0.00                     |        |
| 18   | 2                        | 1     |          |    |    |    |    |    |    |    |    |    |    |   |   | T |   |   |   |   |   |   | G                |                      | Chr3:174183068-174183091  | 0.00                     |        |
| 19   | 2                        | 1     |          |    |    |    |    |    |    |    |    |    |    |   |   | T |   |   |   |   |   |   | G                |                      | Chr9:16372961-16372984    | 0.00                     |        |
| 20   | 2                        | 1     |          |    |    |    | G  |    |    |    |    |    |    |   |   | T |   |   |   |   |   |   | T                |                      | Chr6:35449294-35449317    | 0.00                     |        |
| 21   | 2                        | 1     | C        |    |    |    |    |    |    |    |    |    |    |   |   | g |   |   |   |   |   |   | C                |                      | Chr2:48116260-48116283    | 0.00                     |        |
| 22   | 2                        | 1     | C        |    |    |    |    |    |    |    |    |    |    |   |   | g |   |   |   |   |   |   | C                |                      | Chr10:120428313-120428336 | 0.00                     |        |
| 23   | 2                        | 1     |          |    |    |    |    |    |    |    |    |    |    |   |   | T |   |   |   |   |   |   | G                |                      | Chr9:78374914-78374937    | 0.00                     |        |
| 24   | 2                        | 1     |          |    |    |    |    |    |    |    |    |    |    |   |   | T |   |   |   |   |   |   | G                |                      | Chr6:40580933-40580956    | 0.00                     |        |
| 25   | 2                        | 1     |          |    |    |    |    |    |    |    |    |    |    |   |   | T |   |   |   |   |   |   | G                |                      | Chr1:57503045-57503068    | 0.00                     |        |
| 26   | 2                        | 1     |          |    |    |    |    |    |    |    |    |    |    |   |   | T |   |   |   |   |   |   | G                |                      | Chr3:216792332-216792355  | 0.00                     |        |
| 27   | 2                        | 1     |          |    |    |    |    |    |    |    |    |    |    |   |   | T |   |   |   |   |   |   | G                |                      | Chr8:138192658-138192681  | 0.00                     |        |
| 28   | 2                        | 1     |          |    |    |    |    |    |    |    |    |    |    |   |   | T |   |   |   |   |   |   | G                |                      | Chr10:117146380-117146403 | 0.00                     |        |
| 29   | 2                        | 1     |          |    |    |    |    |    |    |    |    |    |    |   |   |   |   |   |   |   |   |   | A                |                      | Chr4:184633059-184633082  | 0.00                     |        |
| 30   | 2                        | 1     |          |    |    |    |    |    |    |    |    |    |    |   |   |   |   |   |   |   |   |   | G                |                      | Chr8:123353866-123353889  | 0.00                     |        |
| 31   | 2                        | 1     |          |    |    |    |    |    |    |    |    |    |    |   |   |   |   |   |   |   |   |   | G                |                      | Chr4:46962972-46962995    | 0.00                     |        |
| 32   | 2                        | 1     |          |    |    |    |    |    |    |    |    |    |    |   |   |   |   |   |   |   |   |   | G                |                      | Chr4:46981868-46981891    | 0.00                     |        |
| 33   | 2                        | 1     |          |    |    |    |    |    |    |    |    |    |    |   |   |   |   |   |   |   |   |   | G                |                      | Chr1:130948589-130948612  | 0.00                     |        |
| 34   | 2                        | 1     |          |    |    |    |    |    |    |    |    |    |    |   |   |   |   |   |   |   |   |   | G                |                      | Chr8:101460540-101460563  | 0.00                     |        |
| 35   | 2                        | 1     |          |    |    |    |    |    |    |    |    |    |    |   |   |   |   |   |   |   |   |   | G                |                      | Chr10:38760703-38760726   | 0.00                     |        |
| 36   | 2                        | 1     |          |    |    |    |    |    |    |    |    |    |    |   |   |   |   |   |   |   |   |   | G                |                      | Chr10:38770324-38770347   | 0.00                     |        |
| 37   | 2                        | 1     |          |    |    |    |    |    |    |    |    |    |    |   |   |   |   |   |   |   |   |   | A                |                      | Chr5:218532749-218532772  | 0.00                     |        |
| 38   | 2                        | 1     |          |    |    |    |    |    |    |    |    |    |    |   |   |   |   |   |   |   |   |   | A                |                      | Chr5:218542334-218542357  | 0.00                     |        |
| 39   | 2                        | 1     |          |    |    |    |    |    |    |    |    |    |    |   |   |   |   |   |   |   |   |   | G                |                      | Chr10:83019302-83019325   | 0.00                     |        |
| 40   | 2                        | 1     |          |    |    |    |    |    |    |    |    |    |    |   |   |   |   |   |   |   |   |   | T                |                      | Chr3:5743937-5743960      | 0.00                     |        |
| 41   | 2                        | 1     |          |    |    |    |    |    |    |    |    |    |    |   |   |   |   |   |   |   |   |   | G                |                      | Chr9:63992902-63992925    | 0.00                     |        |
| 42   | 2                        | 1     |          |    |    |    |    |    |    |    |    |    |    |   |   |   |   |   |   |   |   |   | G                |                      | Chr9:57340264-57340287    | 0.00                     |        |
| 43   | 2                        | 1     |          |    |    |    |    |    |    |    |    |    |    |   |   |   |   |   |   |   |   |   | T                |                      | Chr4:146163129-146163152  | 0.00                     |        |
| 44   | 2                        | 1     |          |    |    |    |    |    |    |    |    |    |    |   |   |   |   |   |   |   |   |   | T                |                      | Chr2:213478153-213478176  | 0.00                     |        |
| 45   | 2                        | 1     |          |    |    |    |    |    |    |    |    |    |    |   |   |   |   |   |   |   |   |   | A                |                      | Chr5:223273918-223273940  | 2.38                     |        |
| 46   | 2                        | 1     |          |    |    |    |    |    |    |    |    |    |    |   |   |   |   |   |   |   |   |   | A                |                      | Chr1:137725782-137725804  | 0.00                     |        |
| 47   | 2                        | 1     |          |    |    |    |    |    |    |    |    |    |    |   |   |   |   |   |   |   |   |   | A                |                      | Chr1:159151911-159151933  | 0.00                     |        |
| 48   | 2                        | 1     |          |    |    |    |    |    |    |    |    |    |    |   |   |   |   |   |   |   |   |   | A                |                      | Chr1:199634954-199634976  | 0.00                     |        |
| 49   | 2                        | 1     |          |    |    |    |    |    |    |    |    |    |    |   |   |   |   |   |   |   |   |   | A                |                      | Chr1:232879291-232879313  | 0.00                     |        |
| 50   | 2                        | 0     |          |    |    |    |    |    |    |    |    |    |    |   |   |   |   |   |   |   |   |   | A                |                      | Chr1:304501362-304501384  | 0.00                     |        |
| 51   | 2                        | 0     |          |    |    |    |    |    |    |    |    |    |    |   |   |   |   |   |   |   |   |   | A                |                      | Chr2:75055786-75055808    | 0.00                     |        |
| 52   | 2                        | 0     |          |    |    |    |    |    |    |    |    |    |    |   |   |   |   |   |   |   |   |   | A                |                      | Chr3:145198993-145199015  | 0.00                     |        |
| 53   | 2                        | 1     |          |    |    |    |    |    |    |    |    |    |    |   |   |   |   |   |   |   |   |   | A                |                      | Chr4:79878295-79878317    | 0.00                     |        |
| 54   | 2                        | 1     |          |    |    |    |    |    |    |    |    |    |    |   |   |   |   |   |   |   |   |   | A                |                      | Chr5:2689067-2689089      | 0.00                     |        |
| 55   | 2                        | 1     |          |    |    |    |    |    |    |    |    |    |    |   |   |   |   |   |   |   |   |   | A                |                      | Chr5:110101791-110101813  | 0.00                     |        |
| 56   | 2                        | 1     |          |    |    |    |    |    |    |    |    |    |    |   |   |   |   |   |   |   |   |   | A                |                      | Chr5:110111414-110111436  | 0.00                     |        |
| 57   | 2                        | 1     |          |    |    |    |    |    |    |    |    |    |    |   |   |   |   |   |   |   |   |   | A                |                      | Chr5:126305549-126305571  | 0.00                     |        |
| 58   | 2                        | 0     |          |    |    |    |    |    |    |    |    |    |    |   |   |   |   |   |   |   |   |   | A                |                      | Chr6:125674373-125674395  | 0.00                     |        |
| 59   | 2                        | 1     |          |    |    |    |    |    |    |    |    |    |    |   |   |   |   |   |   |   |   |   | A                |                      | Chr7:124810038-124810060  | 39.49                    |        |
| 60   | 2                        | 1     |          |    |    |    |    |    |    |    |    |    |    |   |   |   |   |   |   |   |   |   | A                |                      | Chr8:15761268-15761290    | 0.00                     |        |
| 61   | 2                        | 1     |          |    |    |    |    |    |    |    |    |    |    |   |   |   |   |   |   |   |   |   | A                |                      | Chr8:15770931-15770953    | 0.00                     |        |
| 62   | 2                        | 1     |          |    |    |    |    |    |    |    |    |    |    |   |   |   |   |   |   |   |   |   | A                |                      | Chr8:50000473-50000495    | 0.00                     |        |
| 63   | 2                        | 1     |          |    |    |    |    |    |    |    |    |    |    |   |   |   |   |   |   |   |   |   | A                |                      | Chr8:139620037-139620059  | 0.00                     |        |
| 64   | 2                        | 1     |          |    |    |    |    |    |    |    |    |    |    |   |   |   |   |   |   |   |   |   | A                |                      | Chr9:22064095-22064117    | 0.00                     |        |
| 65   | 2                        | 1     |          |    |    |    |    |    |    |    |    |    |    |   |   |   |   |   |   |   |   |   | A                |                      | Chr9:59915238-59915260    | 0.00                     |        |
| 66   | 2                        | 0     |          |    |    |    |    |    |    |    |    |    |    |   |   |   |   |   |   |   |   |   | A                |                      | Chr9:159463178-159463200  | 0.00                     |        |

Supplementary Table 4. Comprehensive list of cleaved genomic repeat sites detected from M2 guide RNA using CLEAVE-Seq

| Location                  | Cut Site  | CutSite_WRT_Target | MM_Type | DNA_Sequence               | RNA_Sequence              | Strand | Mismatches | Bulge Size | Normalized Read Count Rep 1 | Normalized Read Count Rep 2 | Avg CLEAVE-Seq Reads |
|---------------------------|-----------|--------------------|---------|----------------------------|---------------------------|--------|------------|------------|-----------------------------|-----------------------------|----------------------|
| Chr5:37860732-37860754    | 37860737  | 3                  | RNA     | GGCCGAGGTGCACTACCGGCGNRG   | tG-GggGTGACTACCGGCGAGG    | -      | 2          | 2          | 469                         | 589.33                      | 529.17               |
| Chr9:14363173-14363175    | 14363170  | 3                  | X       | GGCCGAGGTGCACTACCGGCGNRG   | GGCCGAGGTGCACTACCGGCGCGG  | +      | 0          | 0          | 234                         | 220.31                      | 227.16               |
| Chr10:5286571-5286593     | 5286586   | 5                  | RNA     | GGCCGAGGTGCACTACCGGCGNRG   | G-CCGCGGCGACTACCGGCGAGG   | +      | 2          | 1          | 79                          | 143.20                      | 111.10               |
| Chr3:200475375-20047539   | 20047540  | 5                  | RNA     | GGCCGAGGTGCACTACCGGCGNRG   | GGCCGAGGTGCACTACCGGCGG    | +      | 1          | 1          | 25                          | 68.85                       | 48.43                |
| Chr7:124810038-124810060  | 124810053 | 5                  | RNA     | GGCCGAGGTGCACTACCGGCGNRG   | GGC-GAGGcCAcTACCGGCGAG    | +      | 2          | 1          | 25                          | 53.98                       | 39.49                |
| Chr5:62435814-62435836    | 62435830  | 4                  | RNA     | GGCCGAGGTGCACTACCGGCGNRG   | a-CAGAGTcCGAcCaacCGGCGG   | +      | 5          | 1          | 21                          | 31.94                       | 26.47                |
| Chr5:144051759-144051781  | 144051776 | 3                  | DNA     | GGCC-GAGGTGCACTACCGGCGNRG  | GGcCTGAaGgGaaTACCGGCTGG   | +      | 5          | 1          | 26                          | 12.67                       | 19.34                |
| Chr7:61544299-61544321    | 61544305  | 4                  | DNA     | GGC-CGAGGTGCACTACCGGCGNRG  | GcCTcGAGGcCAcTACCGGCGG    | +      | 4          | 1          | 13                          | 24.78                       | 18.89                |
| Chr2:152062830-152062852  | 152062846 | 4                  | RNA     | GGCCGAGGTGCACTACCGGCGNRG   | GaC-a-GTcCGTcCAaCcaCGGCGG | +      | 5          | 1          | 1                           | 31.94                       | 16.47                |
| Chr10:84440789-84440811   | 84440794  | 3                  | RNA     | GGCCGAGGTGCACTACCGGCGNRG   | G-aCGAGGTGCAcCaCGGCGG     | -      | 4          | 1          | 13                          | 19.83                       | 16.42                |
| Chr10:106127836-106127858 | 106127852 | 4                  | RNA     | GGCCGAGGTGCACTACCGGCGNRG   | GaCa-GcGTGCAcCaCGGCGG     | +      | 5          | 1          | 3                           | 29.19                       | 16.10                |
| Chr2:37363776-37363798    | 37363794  | 2                  | DNA     | GGCC-GAGGTGCACTACCGGCGNRG  | GGCCcATGTCGACTACCGGCGAGG  | +      | 2          | 1          | 20                          | 9.36                        | 14.68                |
| Chr5:69134156-69134178    | 69134163  | 5                  | RNA     | GGCCGAGGTGCACTACCGGCGNRG   | GG-gagcGcCTACCGGCGGG      | -      | 5          | 2          | 26                          | 0.00                        | 13.00                |
| Chr7:5864100-5864122      | 5864116   | 4                  | RNA     | GGCCGAGGTGCACTACCGGCGNRG   | GGCCGAGGTG-GgTACCGGCGG    | +      | 4          | 1          | 10                          | 14.87                       | 12.44                |
| Chr6:16630906-16630928    | 16630922  | 4                  | RNA     | GGCCGAGGTGCACTACCGGCGNRG   | GcCaCGGTGCGA-TACCGGCGGG   | +      | 1          | 1          | 20                          | 4.41                        | 12.21                |
| Chr3:33020604-33020626    | 33020609  | 3                  | RNA     | GGCCGAGGTGCACTACCGGCGNRG   | HsGc-GGTGCAcCaCGGCGG      | -      | 5          | 1          | 2                           | 22.03                       | 12.02                |
| Chr1:259957715-25995773   | 25995772  | 3                  | X       | GGCCGAGGTGCACTACCGGCGNRG   | GGGCGAGTcTCAcCaCGGCGGG    | +      | 4          | 0          | 21                          | 2.00                        | 11.60                |
| Chr7:173232468-173232490  | 173232473 | 3                  | RNA     | GGCCGAGGTGCACTACCGGCGNRG   | G-aCtAGTcGACTACCGGCGGG    | +      | 3          | 1          | 11                          | 11.57                       | 11.29                |
| Chr2:80845034-80845056    | 80845049  | 5                  | RNA     | GGCCGAGGTGCACTACCGGCGNRG   | G-CGAGcCGACTACCGGCGG      | +      | 3          | 2          | 17                          | 4.41                        | 10.71                |
| Chr10:101131469-101131491 | 101131487 | 2                  | RNA     | GGCCGAGGTGCACTACCGGCGNRG   | GgCGcAG-CcTgCaCGGCGG      | +      | 5          | 2          | 3                           | 18.18                       | 10.59                |
| Chr7:119054025-119054047  | 119054032 | 5                  | RNA     | GGCCGAGGTGCACTACCGGCGNRG   | GgCGcAGcCaT-CcCGGCGG      | -      | 5          | 1          | 7                           | 13.77                       | 10.39                |
| Chr3:232791371-232791393  | 232791387 | 4                  | RNA     | GGCCGAGGTGCACTACCGGCGNRG   | G-aCGGcGTGCAcCaCGGCGG     | +      | 4          | 1          | 16                          | 16.52                       | 10.26                |
| Chr5:102819446-102819468  | 102819453 | 5                  | RNA     | GGCCGAGGTGCACTACCGGCGNRG   | GGC-CGAGTcCGaactCCGCGAG   | -      | 5          | 1          | 2                           | 17.62                       | 9.81                 |
| Chr1:17486818-17486840    | 17486825  | 5                  | DNA     | GGC-CGAGTcCGACTACCGGCGNRG  | GcCTCGAGGcCTcCGGCTGG      | +      | 4          | 1          | 19                          | 0.00                        | 9.50                 |
| Chr4:245455294-245455316  | 245455298 | 2                  | DNA     | GGCCGAGGTGCACTACCGGCGNRG   | GGCCGAGGgGaaTcCGGCGGG     | -      | 5          | 1          | 0                           | 18.73                       | 9.37                 |
| Chr4:240239220-240239242  | 240239225 | 3                  | RNA     | GGCCGAGGTGCACTACCGGCGNRG   | G-cGGGTGCTGcAaCGGCGG      | -      | 5          | 1          | 11                          | 7.71                        | 9.36                 |
| Chr2:44981747-44981769    | 44981754  | 5                  | RNA     | GGCCGAGGTGCACTACCGGCGNRG   | aCGcATaTCAcTACC-gAG       | -      | 5          | 2          | 18                          | 0.00                        | 9.00                 |
| Chr1:53187763-53187785    | 53187770  | 5                  | RNA     | GGCCGAGGTGCACTACCGGCGNRG   | GcCaATcTgGcCTA-gGcAG      | +      | 5          | 2          | 18                          | 0.00                        | 9.00                 |
| Chr7:82662153-82662175    | 82662160  | 5                  | RNA     | GGCCGAGGTGCACTACCGGCGNRG   | GtTCGcGAGcCT-CcCGGCGAG    | -      | 5          | 1          | 18                          | 0.00                        | 9.00                 |
| Chr7:102664667-102664689  | 102664684 | 3                  | RNA     | GGCCGAGGTGCACTACCGGCGNRG   | GaCCGAGT-GcAGcCaCGaAGG    | +      | 5          | 1          | 18                          | 0.00                        | 9.00                 |
| Chr9:54983896-54983918    | 54983902  | 4                  | RNA     | GGCCGAGGTGCACTACCGGCGNRG   | GGC-gAGGcCAcTCCCGCGG      | +      | 4          | 2          | 0                           | 17.62                       | 8.81                 |
| Chr3:152958354-152958376  | 152958369 | 5                  | RNA     | GGCCGAGGTGCACTACCGGCGNRG   | cGgCGAaTtG-gTACCcCGCGG    | +      | 5          | 2          | 0                           | 17.62                       | 8.81                 |
| Chr9:70745680-70745702    | 70745697  | 3                  | DNA     | GGC-CGAGTcCGACTACCGGCGNRG  | GcTCGAGGcGcTCCCGGCTGG     | +      | 4          | 1          | 2                           | 15.42                       | 8.71                 |
| Chr2:19786781-19786803    | 19786783  | 3                  | RNA     | GGCCGAGGTGCACTACCGGCGNRG   | G-aCGAGTcCGACTACCGGCGG    | +      | 4          | 1          | 10                          | 7.16                        | 8.58                 |
| Chr5:134414881-134414903  | 134414887 | 4                  | RNA     | GGCCGAGGTGCACTACCGGCGNRG   | GgCaCGAGTcCGCAaAt-CCGCGG  | +      | 5          | 1          | 0                           | 17.07                       | 8.54                 |
| Chr1:25488084-25488106    | 25488101  | 3                  | DNA     | GGC-CCGAGTcCGACTACCGGCGNRG | GTCCTCGAGTcCaAGcCaCGAGG   | +      | 5          | 1          | 0                           | 17.07                       | 8.54                 |
| Chr4:100282684-100282706  | 100282690 | 4                  | X       | GGCCGAGGTGCACTACCGGCGNRG   | GgaaGAGTgTgCtAGcGGCTGG    | -      | 5          | 0          | 0                           | 17.07                       | 8.54                 |
| Chr5:99134781-99134803    | 99134798  | 3                  | RNA     | GGCCGAGGTGCACTACCGGCGNRG   | GcCGcAGTcCaA-ACCcGcAG     | +      | 5          | 2          | 17                          | 0.00                        | 8.50                 |
| Chr4:220583733-220583755  | 220583749 | 4                  | X       | GGCCGAGGTGCACTACCGGCGNRG   | GGCCGAGTcCGACTACCGGCGG    | +      | 4          | 0          | 3                           | 13.77                       | 8.39                 |
| Chr2:56588382-56588404    | 56588398  | 4                  | RNA     | GGCCGAGGTGCACTACCGGCGNRG   | G-aCGGcGTGCAcCaCGGCGG     | +      | 5          | 1          | 0                           | 16.52                       | 8.26                 |
| Chr1:22858453-22858475    | 22858459  | 4                  | RNA     | GGCCGAGGTGCACTACCGGCGNRG   | G-aCGGcGTGCAcCaCGGCGG     | +      | 5          | 1          | 5                           | 11.02                       | 8.01                 |
| Chr2:59843341-59843363    | 59843348  | 5                  | DNA     | GGC-CGAGTcCGACTACCGGCGNRG  | GGCTGCGAGcCaTcTcCGGCGG    | -      | 5          | 2          | 16                          | 0.00                        | 8.00                 |
| Chr5:90344751-90344773    | 90344768  | 3                  | DNA     | GGCCGAGGTGCACTACCGGCGNRG   | GGCCGAGTcCGACTACCGGCGG    | +      | 5          | 1          | 16                          | 0.00                        | 8.00                 |
| Chr2:146608744-146608766  | 146608760 | 4                  | RNA     | GGCCGAGGTGCACTACCGGCGNRG   | GGCCGAGTcCGACTACCGGCGG    | +      | 5          | 1          | 0                           | 15.97                       | 7.99                 |
| Chr2:5242323-5242325      | 5242320   | 5                  | RNA     | GGCCGAGGTGCACTACCGGCGNRG   | GgGcGAGcCaACTCCCGCGG      | +      | 5          | 1          | 0                           | 15.97                       | 7.99                 |
| Chr7:19666173-19666195    | 19666188  | 5                  | RNA     | GGCCGAGGTGCACTACCGGCGNRG   | GGC-HGgAGTACCGGCTGG       | +      | 5          | 2          | 6                           | 9.91                        | 7.96                 |
| Chr2:187376830-187376852  | 187376848 | 2                  | RNA     | GGCCGAGGTGCACTACCGGCGNRG   | G-CacGgCGAGaCCCGCGAG      | +      | 5          | 2          | 8                           | 7.71                        | 7.86                 |
| Chr6:42796472-42796494    | 42796478  | 4                  | RNA     | GGCCGAGGTGCACTACCGGCGNRG   | G-CcCAAGTcCAcTcCGCTGG     | +      | 5          | 1          | 9                           | 6.61                        | 7.81                 |
| Chr4:132703610-132703632  | 132703628 | 2                  | RNA     | GGCCGAGGTGCACTACCGGCGNRG   | cGgAGAGTgGA-aCGGcAGG      | +      | 5          | 2          | 0                           | 15.42                       | 7.71                 |
| Chr6:82325146-82325168    | 82325152  | 4                  | RNA     | GGCCGAGGTGCACTACCGGCGNRG   | GGC-tcGgAGTcCGACTCGGCGG   | +      | 5          | 2          | 0                           | 15.42                       | 7.71                 |
| Chr2:5765992-5765614      | 5765610   | 2                  | RNA     | GGCCGAGGTGCACTACCGGCGNRG   | GGC-aGgGtAGTgGgCGGCGG     | +      | 5          | 2          | 0                           | 15.42                       | 7.71                 |
| Chr8:102976801-102976823  | 102976819 | 2                  | RNA     | GGCCGAGGTGCACTACCGGCGNRG   | GGCGGAGTcCGAC-gGaaAGG     | +      | 5          | 2          | 0                           | 15.42                       | 7.71                 |
| Chr8:9026657-9026679      | 9026675   | 5                  | DNA     | GGC-CGAGTcCGACTACCGGCGNRG  | GGCTCtGgGgCAcCaCGGCGG     | +      | 5          | 2          | 0                           | 15.42                       | 7.71                 |
| Chr1:29132869-29132891    | 29132874  | 3                  | RNA     | GGCCGAGGTGCACTACCGGCGNRG   | GCaG-gGTGAGcCaCGGCGG      | +      | 5          | 1          | 0                           | 15.42                       | 7.71                 |
| Chr3:147799367-147799389  | 147799362 | 3                  | RNA     | GGCCGAGGTGCACTACCGGCGNRG   | GGCCGAGTcCGACTACCGGCGG    | +      | 4          | 1          | 0                           | 15.42                       | 7.71                 |
| Chr6:133774274-133774296  | 133774291 | 3                  | DNA     | GGC-CGAGTcCGACTACCGGCGNRG  | GcTCGAGGcGcTCCCGGCTGG     | +      | 4          | 1          | 11                          | 4.41                        | 7.71                 |
| Chr7:101947601-101947623  | 101947608 | 5                  | DNA     | GGC-CGAGTcCGACTACCGGCGNRG  | GGCGGgGcTcGCAcTcCGGCGAG   | -      | 5          | 1          | 0                           | 15.42                       | 7.50                 |
| Chr5:190861491-190861513  | 190861498 | 5                  | RNA     | GGCCGAGGTGCACTACCGGCGNRG   | GcTcGtGtTcGACT-CCGGCTGG   | -      | 5          | 1          | 15                          | 0.00                        | 7.50                 |
| Chr8:137765681-137765703  | 137765688 | 5                  | RNA     | GGCCGAGGTGCACTACCGGCGNRG   | GTCcCAaAaT-aATACCGGaaAG   | +      | 5          | 2          | 15                          | 0.00                        | 7.50                 |
| Chr7:108353924-108353946  | 108353941 | 3                  | RNA     | GGCCGAGGTGCACTACCGGCGNRG   | tGCCAGcCaGcCAcTcCGG       | +      | 5          | 2          | 15                          | 0.00                        | 7.50                 |
| Chr3:2742482-2742504      | 2742489   | 5                  | DNA     | GGCCGAGGTGCACTACCGGCGNRG   | aGCaGAGTgGACTCGAaCGGCGAG  | -      | 4          | 2          | 0                           | 15.42                       | 7.50                 |
| Chr2:22811375-22811397    | 22811382  | 5                  | RNA     | GGCCGAGGTGCACTACCGGCGNRG   | GaCCGAGGtGtCG-cGGGCTGG    | -      | 5          | 1          | 15                          | 0.00                        | 7.50                 |
| Chr2:139725408-139725430  | 139725425 | 3                  | RNA     | GGCCGAGGTGCACTACCGGCGNRG   | GGCCaTgGTGCACTAttc-CCAG   | +      | 5          | 1          | 0                           | 14.87                       | 7.44                 |
| Chr7:42529888-42529910    | 42529903  | 3                  | RNA     | GGCCGAGGTGCACTACCGGCGNRG   | aGc-HSTgAGTcCGACTCGG      | +      | 5          | 2          | 0                           | 14.87                       | 7.44                 |
| Chr5:183185433-183185455  | 183185438 | 3                  | RNA     | GGCCGAGGTGCACTACCGGCGNRG   | GGCCGAGTcCGACTACCGGCGG    | +      | 3          | 1          | 0                           | 14.87                       | 7.44                 |
| Chr4:202796965-202796987  | 202796980 | 5                  | RNA     | GGCCGAGGTGCACTACCGGCGNRG   | HCCc-GTcCAcTACCGGCGGG     | +      | 4          | 2          | 1                           | 13.77                       | 7.39                 |
| Chr4:142294326-142294348  | 142294343 | 3                  | DNA     | GGC-CGAGTcCGACTACCGGCGNRG  | GcTCGAGGcGcTCCCGGCTGG     | +      | 4          | 1          | 4                           | 10.46                       | 7.23                 |
| Chr5:167972398-167972420  | 167972402 | 2                  | RNA     | GGCCGAGGTGCACTACCGGCGNRG   | GgGCGA-TcGAGAcCaTcCGGCGG  | +      | 5          | 2          | 0                           | 14.32                       | 7.16                 |
| Chr2:23885968-23885990    | 23885984  | 4                  | RNA     | GGCCGAGGTGCACTACCGGCGNRG   | GcCaGAGGcGaaT-CCGGCGGG    | +      | 3          | 1          | 0                           | 14.32                       | 7.16                 |
| Chr8:167939418-167939440  | 167939422 | 4                  | RNA     | GGCCGAGGTGCACTACCGGCGNRG   | GG-gAGATgACTCCGAGCGG      | -      | 5          | 2          | 0                           | 14.32                       | 7.16                 |
| Chr4:178023389-178023411  | 178023407 | 2                  | RNA     | GGCCGAGGTGCACTACCGGCGNRG   | t-CGcGTCGcTAAcCGGCGG      | -      | 5          | 2          | 0                           | 14.32                       | 7.16                 |
| Chr2:85683422-85683444    | 85683428  | 4                  | RNA     | GGCCGAGGTGCACTACCGGCGNRG   | GcTcAGG-CGAGTACCGGCGG     | -      | 5          | 1          | 0                           | 14.32                       | 7.16                 |
| Chr1:189492830-189492852  | 189492835 | 3                  | RNA     | GGCCGAGGTGCACTACCGGCGNRG   | GcTcGgGTgGAT-aCCGCGAGG    | -      | 5          | 2          | 0                           | 14.32                       | 7.16                 |
| Chr5:20973451-20973473    | 20973468  | 3                  | RNA     | GGCCGAGGTGCACTACCGGCGNRG   | GGC-CaAGTcCGACTACCGGCGG   | +      | 5          | 2          | 0                           | 14.32                       | 7.16                 |
| Chr10:14295448-142954470  | 142954465 | 3                  | RNA     | GGCCGAGGTGCACTACCGGCGNRG   | GGCCGAGTcCGACTACCGGCGG    | +      | 5          | 2          | 14                          | 0.00                        | 7.00                 |
| Chr7:165223993-165224015  | 165224010 | 3                  | DNA     | G-GCCAGGTGCACTACCGGCGNRG   | GTACCAGGcCGcGAGcTcGGCGAG  | +      | 5          | 2          | 14                          | 0.00                        | 7.00                 |
| Chr4:220064080-22006402   | 220064097 | 3                  | RNA     | GGCCGAGGTGCACTACCGGCGNRG   | tGCCAGTcTgTcTCCCGCGG      | +      | 5          | 1          | 14                          | 0.00                        | 7.00                 |
| Chr8:93987706-93987728    | 93987723  | 3                  | RNA     | GGCCGAGGTGCACTACCGGCGNRG   | GGCCcGcAGcGgCGcACC-CGGG   | +      | 5          | 2          | 14                          | 0.00                        | 7.00                 |
| Chr7:125135211-125135233  | 125135216 | 3                  | DNA     | GGCCGAGGTGCACTACCGGCGNRG   | GGCCaAGTcCGACTACCGGCGG    | +      | 5          | 1          | 5                           | 8.81                        | 6.91                 |
| Chr6:77861766-77861788    | 77861782  | 4                  | RNA     | GGCCGAGGTGCACTACCGGCGNRG   | GGC-tcGgACTACCGGCGG       | +      | 5          | 2          | 0                           | 13.77                       | 6.89                 |
| Chr2:18015029-18015051    | 18015033  | 3                  | RNA     | GGCCGAGGTGCACTACCGGCGNRG   | GGCCAGcTgAGTAAcCGGCGG     | +      | 4          | 1          | 0                           | 13.7                        |                      |

|                           |   |     |                           |                          |   |   |   |    |       |      |
|---------------------------|---|-----|---------------------------|--------------------------|---|---|---|----|-------|------|
| Chr6:47560230-47560252    | 4 | RNA | GGCCGAGGTGCACTACCGGCGNRG  | G-aCGAGtTCaCaCgaGCGGG    | + | 5 | 1 | 0  | 12.12 | 6.06 |
| Chr1:113110081-113110103  | 5 | DNA | GGCCGAGGTGCACT-ACCGGCGNRG | GGCTCGGAGCACTCaCaGtGGG   | - | 5 | 1 | 0  | 12.12 | 6.06 |
| Chr8:56668510-56668528    | 2 | RNA | GGCCGAGGTGCACTACCGGCGNRG  | aGGCCAG-G-CACTcGtCGTGG   | + | 5 | 2 | 0  | 12.12 | 6.06 |
| Chr3:158346111-158346133  | 3 | RNA | GGCCGAGGTGCACTACCGGCGNRG  | GGCCGCGtGtGc-CgGGCGGG    | + | 5 | 2 | 0  | 12.12 | 6.06 |
| Chr6:160184621-160184643  | 2 | RNA | GGCCGAGGTGCACTACCGGCGNRG  | GaCC-AGGTCTtCTTcCaGcAGG  | + | 5 | 1 | 0  | 12.12 | 6.06 |
| Chr9:10953816-10953818    | 5 | RNA | GGCCGAGGTGCACTACCGGCGNRG  | G-aGAGGtGtGtGtGtGGGGGG   | + | 4 | 1 | 0  | 12.12 | 6.06 |
| Chr5:17487623-17487645    | 3 | RNA | GGCCGAGGTGCACTACCGGCGNRG  | G-aCGAGTGCaCaCgGcGGG     | + | 4 | 1 | 0  | 12.12 | 6.06 |
| Chr6:101731284-101731306  | 4 | DNA | GCC-CCGAGTGCAGTACCGGCGNRG | GcCTCGAGGtGcTCTCCGGCGGG  | - | 5 | 1 | 0  | 12.12 | 6.06 |
| Chr8:153226687-153226709  | 5 | RNA | GGCCGAGGTGCACTACCGGCGNRG  | tTCcGAGTCTGATtG-GGGCGG   | - | 5 | 2 | 0  | 12.12 | 6.06 |
| Chr3:42113853-42113875    | 4 | RNA | GGCCGAGGTGCACTACCGGCGNRG  | GGCCAGcGcGAGtA-GaCGAG    | + | 5 | 2 | 0  | 12.12 | 6.06 |
| Chr1:164563816-164563838  | 5 | RNA | GGCCGAGGTGCACTACCGGCGNRG  | GCCaAGAGT-GaCgCGGgaGAG   | + | 4 | 1 | 0  | 12.12 | 6.06 |
| Chr6:67380621-67380643    | 3 | RNA | GGCCGAGGTGCACTACCGGCGNRG  | GGCCGAGGTGCACT-CCGGCGAG  | + | 3 | 1 | 12 | 0.00  | 6.00 |
| Chr9:79804613-79804635    | 3 | RNA | GGCCGAGGTGCACTACCGGCGNRG  | cGaGAGtGCa-TACCGCGGG     | + | 4 | 2 | 12 | 0.00  | 6.00 |
| Chr2:57971352-57971374    | 3 | RNA | GGCCGAGGTGCACTACCGGCGNRG  | GGaGAG-GcGtACaGgCGGG     | + | 5 | 2 | 12 | 0.00  | 6.00 |
| Chr6:75926787-75926809    | 3 | DNA | G-CCCGAGTGCAGTACCGGCGNRG  | GTCTCGAGtCGcTAgCTGGCGG   | + | 5 | 1 | 12 | 0.00  | 6.00 |
| Chr9:105659733-105659755  | 5 | DNA | GGCCGAGGTGCACTACCGGCGNRG  | GGCCGAGGTGCACTAcGtGGGG   | - | 4 | 2 | 12 | 0.00  | 6.00 |
| Chr5:24959542-24959564    | 5 | RNA | GGCCGAGGTGCACTACCGGCGNRG  | GG-CGAGGtGtGtGtGGGGGG    | - | 4 | 2 | 12 | 0.00  | 6.00 |
| Chr1:163300941-163300963  | 3 | RNA | GGCCGAGGTGCACTACCGGCGNRG  | GtGcCGcGAG-C-CTACGGCAGG  | + | 5 | 1 | 12 | 0.00  | 6.00 |
| Chr7:152918617-15291889   | 5 | DNA | GGCCGAGGTGCACTACCGGCGNRG  | cGcCaAGTGCAGCaCGcCGG     | + | 5 | 1 | 12 | 0.00  | 6.00 |
| Chr9:133680153-133680175  | 3 | RNA | GGCCGAGGTGCACTACCGGCGNRG  | GCCaAGGTGCG-TcCaGtTGG    | + | 5 | 2 | 12 | 0.00  | 6.00 |
| Chr6:66171617-66171639    | 3 | RNA | GGCCGAGGTGCACTACCGGCGNRG  | G-aCGGtGTCAGCaCgGcGGG    | + | 5 | 1 | 12 | 0.00  | 6.00 |
| Chr6:93690437-93690459    | 5 | RNA | GGCCGAGGTGCACTACCGGCGNRG  | ITCCGAGCaG-ACtTcGtGgAG   | + | 5 | 1 | 12 | 0.00  | 6.00 |
| Chr1:122673697-122673719  | 5 | RNA | GGCCGAGGTGCACTACCGGCGNRG  | GGCCAGaGc-ACtTcCaGtAG    | - | 5 | 2 | 12 | 0.00  | 6.00 |
| Chr4:80762391-80762413    | 3 | RNA | GGCCGAGGTGCACTACCGGCGNRG  | G-aCGGtGTCAGCaCgGcGGG    | + | 5 | 1 | 12 | 0.00  | 6.00 |
| Chr3:4545233-4545255      | 5 | RNA | GGCCGAGGTGCACTACCGGCGNRG  | G-aCgGGTGCAGCaCgGcGGG    | - | 5 | 1 | 12 | 0.00  | 6.00 |
| Chr4:108794616-108794638  | 3 | RNA | GGCCGAGGTGCACTACCGGCGNRG  | IGtGt-tTgTACTAGcTGGGG    | + | 5 | 1 | 12 | 0.00  | 6.00 |
| Chr7:12807244-12807266    | 3 | RNA | GGCCGAGGTGCACTACCGGCGNRG  | G-aCGAGTGCaCaCgGcGGG     | + | 5 | 1 | 12 | 0.00  | 6.00 |
| Chr2:51154691-51154713    | 5 | RNA | GGCCGAGGTGCACTACCGGCGNRG  | GCCG-GGTGTCAGcAGGtGGG    | - | 4 | 1 | 12 | 0.00  | 6.00 |
| Chr4:11615160-11615182    | 3 | RNA | GGCCGAGGTGCACTACCGGCGNRG  | GGGGAGGTgGtGcG-A-GGCTGG  | + | 5 | 2 | 12 | 0.00  | 6.00 |
| Chr2:6101136-6101158      | 5 | RNA | GGCCGAGGTGCACTACCGGCGNRG  | cGcCaAGTGCAGgA-GHcAG     | + | 5 | 2 | 12 | 0.00  | 6.00 |
| Chr4:114880759-114880781  | 3 | RNA | GGCCGAGGTGCACTACCGGCGNRG  | GCCa-AGGTGCAGcGtGtGAG    | + | 5 | 1 | 12 | 0.00  | 6.00 |
| Chr8:27801455-27801477    | 5 | RNA | GGCCGAGGTGCACTACCGGCGNRG  | G-aCGAGTGCAGtCaCgGcGGG   | - | 5 | 1 | 12 | 0.00  | 6.00 |
| Chr5:120860746-120860768  | 2 | DNA | GGCCGAGGTGCACT-CCGGCGNRG  | GtGcAGGtGcGtTcACGCGGGG   | + | 5 | 1 | 5  | 6.61  | 5.81 |
| Chr2:154881381-154881403  | 4 | RNA | GGCCGAGGTGCACTACCGGCGNRG  | aGcAGtGCTCCAGT-GGCCGG    | + | 4 | 1 | 11 | 5.79  | 5.79 |
| Chr3:199019683-199019705  | 3 | RNA | GGCCGAGGTGCACTACCGGCGNRG  | GGC-tcGgTGCAGCaGtGGG     | - | 5 | 2 | 0  | 11.57 | 5.79 |
| Chr4:113372151-113372173  | 5 | RNA | GGCCGAGGTGCACTACCGGCGNRG  | GGCCGAGGTGCACTACCGGCGNRG | + | 5 | 1 | 12 | 0.00  | 6.00 |
| Chr6:154812669-154812691  | 5 | RNA | GGCCGAGGTGCACTACCGGCGNRG  | GCCaAGTGCAGCaCgGcGGG     | + | 5 | 1 | 12 | 0.00  | 6.00 |
| Chr4:159335495-159335517  | 3 | RNA | GGCCGAGGTGCACTACCGGCGNRG  | GCCcAGc-GACTACGtCTGG     | - | 5 | 2 | 0  | 11.57 | 5.79 |
| Chr8:93012665-93012687    | 4 | RNA | GGCCGAGGTGCACTACCGGCGNRG  | G-aCGGGTGCAGCaCgGcGGG    | + | 5 | 1 | 0  | 11.57 | 5.79 |
| Chr4:140692052-140692074  | 5 | RNA | GGCCGAGGTGCACTACCGGCGNRG  | GCC-AGGTGCAGTcAGgAGG     | + | 5 | 1 | 0  | 11.57 | 5.79 |
| Chr3:232121528-232121550  | 2 | RNA | GGCCGAGGTGCACTACCGGCGNRG  | TG-GAGGagAGCaCCGGCTAG    | + | 5 | 2 | 0  | 11.57 | 5.79 |
| Chr1:180423414-180423436  | 5 | RNA | GGCCGAGGTGCACTACCGGCGNRG  | GCC-HGcGtTACCGGCTGG      | + | 5 | 2 | 0  | 11.57 | 5.79 |
| Chr5:208880944-208880966  | 4 | RNA | GGCCGAGGTGCACTACCGGCGNRG  | GGcGgGtAGtGcCT-CCGcAG    | + | 5 | 2 | 0  | 11.57 | 5.79 |
| Chr7:2295613-2295615      | 5 | DNA | GGCCGAGGTGCACT-CCGGCGNRG  | GGcGgGtTgTACTACTCCGGCGAG | - | 5 | 2 | 11 | 0.55  | 5.78 |
| Chr8:161124161-161124183  | 4 | DNA | GCC-CCGAGTGCAGTACCGGCGNRG | GcCTCGAGGtGtTCTCCGGCTGG  | - | 4 | 1 | 6  | 5.51  | 5.76 |
| Chr4:3340700-3340722      | 2 | DNA | GGCCGAGGTGCACTACCGGCGNRG  | GGCCGAGGTGCACTACCGGCGNRG | + | 5 | 1 | 2  | 5.51  | 5.76 |
| Chr2:145249710-145249732  | 4 | RNA | GGCCGAGGTGCACTACCGGCGNRG  | GtGcGcAGCaGcGc-AgCGcAG   | + | 5 | 1 | 6  | 9.36  | 5.68 |
| Chr4:154376219-154376241  | 3 | RNA | GGCCGAGGTGCACTACCGGCGNRG  | GCCGAGtTCG-cAGCaCAAG     | - | 5 | 2 | 8  | 3.30  | 5.65 |
| Chr6:144813984-144814006  | 5 | RNA | GGCCGAGGTGCACTACCGGCGNRG  | GcTcGAGTGACTTc-GGAtGG    | + | 5 | 2 | 10 | 1.10  | 5.55 |
| Chr2:169106015-169106037  | 5 | RNA | GGCCGAGGTGCACTACCGGCGNRG  | G-IGAGGtAaTcAaCCGGCAGG   | + | 5 | 2 | 5  | 6.06  | 5.53 |
| Chr1:80652535-80652557    | 2 | RNA | GGCCGAGGTGCACTACCGGCGNRG  | GGCCa-GctcAGCaCgGtGG     | - | 5 | 2 | 0  | 11.02 | 5.51 |
| Chr4:130428771-130428793  | 3 | DNA | GCC-CCGAGTGCAGTACCGGCGNRG | GcCTCGAGGtGtTCTCCGGCTGG  | + | 4 | 1 | 0  | 11.02 | 5.51 |
| Chr5:197998205-197998227  | 3 | RNA | GGCCGAGGTGCACTACCGGCGNRG  | GGcGgGtGcGtAGtGc-GaAGG   | + | 5 | 2 | 0  | 11.02 | 5.51 |
| Chr7:105179774-105179796  | 3 | RNA | GGCCGAGGTGCACTACCGGCGNRG  | GGCCGAGGTGCACTACCGGCGNRG | + | 5 | 2 | 0  | 11.02 | 5.51 |
| Chr10:12176696-12176718   | 2 | RNA | GGCCGAGGTGCACTACCGGCGNRG  | GGCTCGgGcGAGg-CCGcGAG    | + | 5 | 2 | 0  | 11.02 | 5.51 |
| Chr9:10406323-10406345    | 5 | RNA | GGCCGAGGTGCACTACCGGCGNRG  | GgG-AGGcAGTGCAGcGGG      | + | 5 | 2 | 0  | 11.02 | 5.51 |
| Chr8:127021243-127021265  | 3 | RNA | GGCCGAGGTGCACTACCGGCGNRG  | G-aCGGGTGCAGCaCgGcGGG    | + | 5 | 2 | 0  | 11.02 | 5.51 |
| Chr4:177107054-177107076  | 4 | DNA | GCC-CCGAGTGCAGTACCGGCGNRG | GGTCCAGGtGcAGtGcAGcGGAG  | + | 4 | 1 | 0  | 11.02 | 5.51 |
| Chr9:82008064-82008086    | 3 | RNA | GGCCGAGGTGCACTACCGGCGNRG  | GGaGAGGtGCG-cAGgGcAGG    | + | 5 | 2 | 0  | 11.02 | 5.51 |
| Chr2:118622125-118622147  | 2 | RNA | GGCCGAGGTGCACTACCGGCGNRG  | GGCCAGtTCG-cAtCaCAAG     | - | 5 | 2 | 0  | 11.02 | 5.51 |
| Chr10:150131590-150131612 | 4 | RNA | GGCCGAGGTGCACTACCGGCGNRG  | GGC-AGcCGcAGCaCgGcGGG    | - | 5 | 2 | 0  | 11.02 | 5.51 |
| Chr10:27044129-27044151   | 4 | RNA | GGCCGAGGTGCACTACCGGCGNRG  | GGCCGcGtGcGcGtGc-CCAG    | + | 5 | 2 | 0  | 11.02 | 5.51 |
| Chr5:75886405-75886427    | 5 | RNA | GGCCGAGGTGCACTACCGGCGNRG  | GGC-tcGgGtACTCGGCTGG     | + | 5 | 2 | 0  | 11.02 | 5.51 |
| Chr4:215783270-215783292  | 2 | RNA | GGCCGAGGTGCACTACCGGCGNRG  | GGCCGgGtGcAGC-CgGGCGGG   | - | 4 | 2 | 0  | 11.02 | 5.51 |
| Chr10:93909137-93909159   | 3 | RNA | GGCCGAGGTGCACTACCGGCGNRG  | GaC-AGTTCGAGTACTCtGtGG   | + | 5 | 1 | 0  | 11.02 | 5.51 |
| Chr10:70309314-70309336   | 3 | RNA | GGCCGAGGTGCACTACCGGCGNRG  | GGCCGAGGTGCACTACCGGCGNRG | + | 5 | 1 | 0  | 11.02 | 5.51 |
| Chr1:30966896-30966918    | 4 | DNA | GGCCGA-GGTGCACTACCGGCGNRG | GCaAGTGGcCGcAGCaGGAAG    | + | 5 | 1 | 0  | 11.02 | 5.51 |
| Chr8:154260387-154260409  | 5 | RNA | GGCCGAGGTGCACTACCGGCGNRG  | aJCCGtGHTCGACTACC-CCGG   | - | 3 | 2 | 11 | 0.00  | 5.50 |
| Chr4:210393287-210393309  | 2 | RNA | GGCCGAGGTGCACTACCGGCGNRG  | GCCaGAGGcGc-ActATCtGCTGG | - | 3 | 1 | 11 | 0.00  | 5.50 |
| Chr4:82363661-82363683    | 5 | RNA | GGCCGAGGTGCACTACCGGCGNRG  | cGcAGAGTGA-CTcCGGtGAG    | + | 5 | 1 | 11 | 0.00  | 5.50 |
| Chr8:152619574-152619596  | 5 | RNA | GGCCGAGGTGCACTACCGGCGNRG  | GaCCAGGc-GaCgCaCaGgAGG   | + | 5 | 1 | 11 | 0.00  | 5.50 |
| Chr10:40287830-40287852   | 5 | RNA | GGCCGAGGTGCACTACCGGCGNRG  | caCCGAGTtGgAGtA-GaAGG    | + | 5 | 2 | 11 | 0.00  | 5.50 |
| Chr4:46003613-46003635    | 5 | RNA | GGCCGAGGTGCACTACCGGCGNRG  | GaGcAG-TGtCaCaCgGcCAG    | - | 5 | 1 | 11 | 0.00  | 5.50 |
| Chr5:49117147-49117169    | 4 | RNA | GGCCGAGGTGCACTACCGGCGNRG  | GGCCGAGGCaCgAggACC-CAAG  | + | 4 | 2 | 11 | 0.00  | 5.50 |
| Chr1:121497457-121497479  | 3 | RNA | GGCCGAGGTGCACTACCGGCGNRG  | GtGcG-GtTCGcAGCTCGCGG    | + | 5 | 2 | 11 | 0.00  | 5.50 |
| Chr2:224654159-22465481   | 5 | DNA | GGCCGAGGTGCACTACCGGCGNRG  | aGcGAGGtGcAGT-TCAGCGGG   | + | 5 | 2 | 11 | 0.00  | 5.50 |
| Chr8:162432545-162432567  | 3 | RNA | GGCCGAGGTGCACTACCGGCGNRG  | tCGcTCCAG-CCGAGCaCtGcAGG | + | 5 | 2 | 11 | 0.00  | 5.50 |
| Chr6:161132228-161132250  | 5 | RNA | GGCCGAGGTGCACTACCGGCGNRG  | IgGcGtGCTCTTACC-CCAGG    | - | 5 | 2 | 0  | 0.00  | 5.50 |
| Chr5:178967961-178967983  | 3 | DNA | GGCCG-AGTGCAGTACCGGCGNRG  | ITGCGAAGTAgGtTCCGGCTAG   | + | 5 | 2 | 0  | 0.00  | 5.50 |
| Chr1:71210030-71210052    | 5 | RNA | GGCCGAGGTGCACTACCGGCGNRG  | GCCaGcGtGcAGC-AGcGgGcGG  | + | 4 | 1 | 11 | 0.00  | 5.50 |
| Chr9:65874133-65874155    | 5 | RNA | GGCCGAGGTGCACTACCGGCGNRG  | GGC-AGGTGtGgGcActcCGCGG  | - | 5 | 2 | 11 | 0.00  | 5.50 |
| Chr8:52557746-52557768    | 5 | RNA | GGCCGAGGTGCACTACCGGCGNRG  | cCGCCAGG-GAGtTcCaGcAGG   | + | 4 | 2 | 11 | 0.00  | 5.50 |
| Chr7:145657742-145657764  | 5 | RNA | GGCCGAGGTGCACTACCGGCGNRG  | GtTcGtGtTGAcCaCCGGCGGG   | - | 5 | 1 | 11 | 0.00  | 5.50 |
| Chr6:71767056-71767078    | 3 | RNA | GGCCGAGGTGCACTACCGGCGNRG  | GGcAGtGc-GACTACaGcAGG    | + | 4 | 1 | 11 | 0.00  | 5.50 |
| Chr6:97576679-97576701    | 3 | RNA | GGCCGAGGTGCACTACCGGCGNRG  | GCC-tcGgGtGAGACTCtGtGG   | + | 5 | 2 | 11 | 0.00  | 5.50 |
| Chr1:217388216-217388238  | 3 | RNA | GGCCGAGGTGCACTACCGGCGNRG  | GGCCGAGGTGCACTACCGGCGNRG | + | 5 | 2 | 11 | 0.00  | 5.50 |
| Chr1:85262125-85262147    | 3 | RNA | GGCCGAGGTGCACTACCGGCGNRG  | GCCcAGGtGcGA-ACtGgTGG    | + | 5 | 2 | 11 | 0.00  | 5.50 |
| Chr7:77522872-77522894    | 3 | RNA | GGCCGAGGTGCACTACCGGCGNRG  | GaGcTl-TCAAGtAGcGGCAGG   | - | 5 | 2 | 3  | 7.71  | 5.36 |
| Chr6:49789848-49789870    | 3 | RNA | GGCCGAGGTGCACTACCGGCGNRG  | GCCcAGGtGcCaACcAC-rtGG   | - | 5 | 2 | 4  | 6.61  | 5.31 |
| Chr9:58610543-58610565    | 4 | RNA | GGCCGAGGTGCACTACCGGCGNRG  | GGCCGAGGtGcGCT-CAgGCGG   | + | 4 | 2 | 10 | 5.28  | 5.28 |
| Chr10:64036763-64036785   | 3 | RNA | GGCCGAGGTGCACTACCGGCGNRG  | GGC-AGGcCGAGcActcCGCGG   | + | 5 | 2 | 0  | 10.46 | 5.23 |
| Chr8:11633727-11633749    | 5 | RNA | GGCCGAGGTGCACTACCGGCGNRG  | GGC-tcGgGtACTACCGGCGG    | - | 5 | 2 | 0  | 10.46 | 5.23 |
| Chr2:194946823-194946845  | 5 | RNA | GGCCGAGGTGCACTACCGGCGNRG  | GGC-AGGcCGAGcActcCGCGG   | - | 5 | 2 | 0  | 10.46 | 5.23 |
| Chr10:5403108-5403130     | 3 | RNA | GGCCGAGGTGCACTACCGGCGNRG  | GCCGAGGtGcGATcTcCGGCTGG  | + | 4 | 1 | 0  | 10.46 | 5.23 |
| Chr9:52767017-52767039    | 4 | RNA | GGCCGAGGTGCACTACCGGCGNRG  | GcCCGAGTCTGtGtT-CCGGCG   | - | 5 | 2 | 0  | 10.46 | 5.23 |
| Chr10:99887435-99887457   | 2 | RNA | GGCCGAGGTGCACTACCGGCGNRG  | G-CCAGTtGtGtGtGtGcAGG    | + | 5 | 1 | 0  | 10.46 | 5.23 |
| Chr4:35078794-35078816    | 3 | RNA | GGCCGAGGTGCACTACCGGCGNRG  | GGcGc-GGcCaActcCGCGGG    | + | 5 | 1 | 0  | 10.46 | 5.23 |
| Chr4:42312088-42312110    | 4 | RNA | GGCCGAGGTGCACTACCGGCGNRG  | GCCaAGGc-CACTAcCaGcAGG   | + | 5 | 1 | 0  | 10.46 | 5.23 |
| Chr9:15636985-156369707   | 4 | RNA | GGCCGAGGTGCACTACCGGCGNRG  | GgGcG-GGcCaActcCGCGGG    | + | 5 | 1 | 0  | 10.46 | 5.23 |
| Chr2:152782016-152782038  | 5 | RNA | GGCCGAGGTGCACTACCGGCGNRG  | a-CGcAGcGAGCaCCGGCAG     | + | 4 | 2 | 0  | 10.46 | 5.23 |
| Chr6:125744945-125744967  | 5 | RNA | GGCC                      |                          |   |   |   |    |       |      |



|                           |   |     |                         |                           |   |   |   |    |      |      |
|---------------------------|---|-----|-------------------------|---------------------------|---|---|---|----|------|------|
| Chr1:117864051-117864073  | 3 | RNA | GGCCGAGGTGCACTACCGGCRNG | GGCCGAGTcAgC-GgGGCCGG     | + | 4 | 2 | 10 | 0.00 | 5.00 |
| Chr1:106937550-106937572  | 3 | RNA | GGCCGAGGTGCACTACCGGCRNG | GGCCGAGGgCaACcACC-gTGG    | + | 5 | 2 | 10 | 0.00 | 5.00 |
| Chr7:178519715-178519737  | 5 | RNA | GGCCGAGGTGCACTACCGGCRNG | GTCCG-GaaAaTACCGGAG       | - | 5 | 2 | 10 | 0.00 | 5.00 |
| Chr3:98731345-98731357    | 5 | RNA | GGCCGAGGTGCACTACCGGCRNG | GTCCG-gTgCACCAGGCaAG      | - | 5 | 2 | 10 | 0.00 | 5.00 |
| Chr1:286311129-286311151  | 3 | RNA | GGCCGAGGTGCACTACCGGCRNG | GgCGaAGGTtGaaA-GGCGAG     | + | 5 | 2 | 10 | 0.00 | 5.00 |
| Chr8:157911346-157911368  | 3 | RNA | GGCCGAGGTGCACTACCGGCRNG | G-CcCGGAGGTgAGTACCGAG     | + | 5 | 1 | 10 | 0.00 | 5.00 |
| Chr6:53635479-53635501    | 3 | RNA | GGCCGAGGTGCACTACCGGCRNG | G-CGAGGtCGAGgAGgCTGG      | + | 5 | 2 | 10 | 0.00 | 5.00 |
| Chr6:123490784-123490806  | 5 | RNA | GGCCGAGGTGCACTACCGGCRNG | gCaCaAG-GCaaAgcCCGCTGG    | - | 5 | 2 | 10 | 0.00 | 5.00 |
| Chr10:13540353-13540375   | 3 | RNA | GGCCGAGGTGCACTACCGGCRNG | GHtCGGtGT-AGtTACCGCTGG    | + | 5 | 1 | 10 | 0.00 | 5.00 |
| Chr1:195438829-195438851  | 3 | RNA | GGCCGAGGTGCACTACCGGCRNG | aaCCGAGGCaAG-AcCCGCTAG    | + | 5 | 2 | 10 | 0.00 | 5.00 |
| Chr10:39102347-39102369   | 5 | RNA | GGCCGAGGTGCACTACCGGCRNG | GHtCGGtTCGAC-AGgAGCTGG    | - | 5 | 1 | 10 | 0.00 | 5.00 |
| Chr2:164611581-164611603  | 5 | RNA | GGCCGAGGTGCACTACCGGCRNG | atTCGtGGT-GCaACCGCGGG     | - | 5 | 1 | 10 | 0.00 | 5.00 |
| Chr4:45652247-45652269    | 5 | RNA | GGCCGAGGTGCACTACCGGCRNG | GGC-AGGcCGaCACCGCGGG      | - | 3 | 2 | 10 | 0.00 | 5.00 |
| Chr6:97520676-97520698    | 3 | RNA | GGCCGAGGTGCACTACCGGCRNG | GGCCG-gGcGtCCaACCGCGGG    | + | 4 | 1 | 10 | 0.00 | 5.00 |
| Chr7:147283183-147283205  | 3 | RNA | GGCCGAGGTGCACTACCGGCRNG | GGC-tcGGtGATtACCGCTGG     | + | 5 | 2 | 10 | 0.00 | 5.00 |
| Chr1:439322-439324        | 5 | DNA | GGCCGAGGTGCACTACCGGCRNG | GGCCGAGGtGcAGTcCGCGAG     | + | 5 | 1 | 10 | 0.00 | 5.00 |
| Chr1:103542857-103542879  | 3 | DNA | GGCCGAGGTGCACTACCGGCRNG | GGCCGAGGtGcAGtCCCGGAG     | + | 5 | 2 | 10 | 0.00 | 5.00 |
| Chr6:140378297-140378319  | 4 | RNA | GGCCGAGGTGCACTACCGGCRNG | caCCAGtGCAGTc-GGCGGG      | - | 5 | 2 | 10 | 0.91 | 4.96 |
| Chr4:138289321-138289343  | 5 | DNA | GGCCGAGGTGCACTACCGGCRNG | GGCCGAGtTcTctcAGAGCGCG    | + | 5 | 2 | 10 | 0.91 | 4.96 |
| Chr4:158402256-158402278  | 2 | RNA | GGCCGAGGTGCACTACCGGCRNG | GaGcG-GTcCaACCGtGAG       | - | 5 | 2 | 10 | 0.91 | 4.96 |
| Chr2:204784597-204784619  | 5 | RNA | GGCCGAGGTGCACTACCGGCRNG | GcGAGAcctGAC-CCGtCAAG     | + | 5 | 2 | 10 | 0.91 | 4.96 |
| Chr9:124699320-124699342  | 4 | DNA | GGCCGAGGTGCACTACCGGCRNG | GGCtAGGtGACTGtCCGGCTGG    | - | 5 | 2 | 10 | 0.91 | 4.96 |
| Chr4:73619090-73619112    | 4 | RNA | GGCCGAGGTGCACTACCGGCRNG | G-aCGGtGTCaCaAGgCGGG      | + | 5 | 1 | 10 | 0.91 | 4.96 |
| Chr3:174099641-174099663  | 4 | DNA | GGCCGAGGTGCACTACCGGCRNG | GtCGAGGtGtGACTaCGGCTAG    | + | 5 | 1 | 10 | 0.91 | 4.96 |
| Chr3:9653646-9653668      | 2 | RNA | GGCCGAGGTGCACTACCGGCRNG | GGCCGAGG-gGtAGtGACTGG     | - | 5 | 2 | 10 | 0.91 | 4.96 |
| Chr4:130192593-130192615  | 5 | RNA | GGCCGAGGTGCACTACCGGCRNG | GGC-GtGtGACTGtAGtGAG      | + | 5 | 2 | 10 | 0.91 | 4.96 |
| Chr5:93537567-93537589    | 3 | RNA | GGCCGAGGTGCACTACCGGCRNG | GGCCGAGGtTcTcTcCGGCTGG    | + | 4 | 1 | 10 | 0.91 | 4.96 |
| Chr9:128563722-128563744  | 4 | RNA | GGCCGAGGTGCACTACCGGCRNG | GgGtGAGGtTCCGACTcTcTcCGAG | - | 5 | 2 | 10 | 0.91 | 4.96 |
| Chr3:170087571-170087593  | 4 | RNA | GGCCGAGGTGCACTACCGGCRNG | GaCGAGG-GCaAGCaAGG        | - | 5 | 1 | 10 | 0.91 | 4.96 |
| Chr4:144380215-144380237  | 2 | RNA | GGCCGAGGTGCACTACCGGCRNG | GGCCGAGGtGgTtGc-IGAG      | + | 5 | 2 | 10 | 0.91 | 4.96 |
| Chr10:150293314-150293336 | 3 | DNA | GGCCGAGGTGCACTACCGGCRNG | aaCaAGGtTCCAGCaAGgCAGG    | + | 5 | 2 | 10 | 0.91 | 4.96 |
| Chr7:152524654-152524676  | 5 | RNA | GGCCGAGGTGCACTACCGGCRNG | GGCaGtGGTGG-TCCGaAGGG     | + | 5 | 2 | 10 | 0.91 | 4.96 |
| Chr5:115554458-115554480  | 4 | RNA | GGCCGAGGTGCACTACCGGCRNG | GtCGtAGTtCGA-ACcTgGGG     | + | 5 | 2 | 10 | 0.91 | 4.96 |
| Chr6:150089663-150089685  | 4 | RNA | GGCCGAGGTGCACTACCGGCRNG | GaCC-AGTtCGAGgtCGCGGG     | - | 5 | 1 | 10 | 0.91 | 4.96 |
| Chr5:60029242-60029264    | 3 | RNA | GGCCGAGGTGCACTACCGGCRNG | GGCCAGtGtGtGAA-ACcGtCTAG  | + | 5 | 2 | 10 | 0.91 | 4.96 |
| Chr7:17938984-17938986    | 2 | RNA | GGCCGAGGTGCACTACCGGCRNG | GtCGAGGtGcAGtCaAGCGGG     | + | 4 | 2 | 10 | 0.91 | 4.96 |
| Chr5:205219580-20521962   | 2 | RNA | GGCCGAGGTGCACTACCGGCRNG | GGC-GAAGtCGAGtCCCGGG      | + | 4 | 2 | 10 | 0.91 | 4.96 |
| Chr4:27992760-27992782    | 4 | RNA | GGCCGAGGTGCACTACCGGCRNG | G-aCGGtGTCaCaAGgCGGG      | + | 5 | 1 | 10 | 0.91 | 4.96 |
| Chr1:216532936-216532958  | 2 | RNA | GGCCGAGGTGCACTACCGGCRNG | GGCCAGtGtGtGtA-TcCGTGG    | + | 5 | 2 | 10 | 0.91 | 4.96 |
| Chr9:36909819-36909841    | 2 | RNA | GGCCGAGGTGCACTACCGGCRNG | GgAGtAGGtCaAC-ACcCaAGG    | + | 5 | 1 | 10 | 0.91 | 4.96 |
| Chr5:67199808-67199830    | 3 | DNA | GGCCGAGGTGCACTACCGGCRNG | GgCGAGGtCGtCGCaAGGCGGG    | + | 5 | 2 | 1  | 8.81 | 4.91 |
| Chr4:68033576-68033598    | 3 | RNA | GGCCGAGGTGCACTACCGGCRNG | tGtCaAGG-GACTACCGGCTGG    | - | 4 | 1 | 7  | 2.75 | 4.88 |
| Chr1:247722181-247722203  | 4 | RNA | GGCCGAGGTGCACTACCGGCRNG | a-CCGAGtGACTACcTCTGG      | - | 5 | 1 | 10 | 0.91 | 4.68 |
| Chr10:88759429-88759451   | 2 | DNA | GGCCGAGGTGCACTACCGGCRNG | GGCCGAGtCGAAcGtCGGCTGG    | + | 4 | 1 | 10 | 0.91 | 4.68 |
| Chr5:213831551-213831573  | 4 | RNA | GGCCGAGGTGCACTACCGGCRNG | GGC-AGGtGtGtGtGtGtCGCGGG  | + | 5 | 2 | 10 | 0.91 | 4.68 |
| Chr1:521369710-521369732  | 4 | RNA | GGCCGAGGTGCACTACCGGCRNG | GtCG-GAGtGtGtGtGtGtGtGtG  | + | 4 | 2 | 10 | 0.91 | 4.68 |
| Chr1:84496767-84496789    | 5 | RNA | GGCCGAGGTGCACTACCGGCRNG | GTCCG-gTgCaACCGGCaAG      | + | 5 | 2 | 10 | 0.91 | 4.68 |
| Chr1:228514745-228514767  | 4 | RNA | GGCCGAGGTGCACTACCGGCRNG | GGCCGAGGtGtGtA-TcTcCGAG   | - | 5 | 1 | 10 | 0.91 | 4.68 |
| Chr1:2293685-2293707      | 3 | RNA | GGCCGAGGTGCACTACCGGCRNG | G-CcAGGtGtGtGtGtGtGtGtG   | + | 5 | 1 | 10 | 0.91 | 4.68 |
| Chr10:16554047-16554069   | 4 | RNA | GGCCGAGGTGCACTACCGGCRNG | G-aCGGtGTCaCaAGgCGGG      | + | 5 | 1 | 10 | 0.91 | 4.68 |
| Chr9:14349986-14350008    | 2 | RNA | GGCCGAGGTGCACTACCGGCRNG | GG-AcTgCGAGtGtGtCGCaGAG   | + | 5 | 2 | 10 | 0.91 | 4.68 |
| Chr1:158090635-158090657  | 2 | RNA | GGCCGAGGTGCACTACCGGCRNG | GgCGAGGtGtGtGtGtGtGtGtG   | + | 5 | 1 | 10 | 0.91 | 4.68 |
| Chr1:154432586-154432608  | 2 | RNA | GGCCGAGGTGCACTACCGGCRNG | GGCCAG-GCtGtCaAGgCGGG     | + | 4 | 2 | 10 | 0.91 | 4.68 |
| Chr2:161607900-161607922  | 3 | RNA | GGCCGAGGTGCACTACCGGCRNG | GGCCAGGtGtGtGtGtGtGtGtG   | - | 5 | 2 | 10 | 0.91 | 4.68 |
| Chr4:64043402-64043424    | 4 | RNA | GGCCGAGGTGCACTACCGGCRNG | GtGtCGGtGtGtGtGtGtGtGtG   | - | 5 | 2 | 10 | 0.91 | 4.68 |
| Chr1:146058732-146058754  | 4 | RNA | GGCCGAGGTGCACTACCGGCRNG | G-aCtGtGtGtGtGtGtGtGtG    | + | 4 | 2 | 10 | 0.91 | 4.68 |
| Chr8:22695348-22695370    | 4 | RNA | GGCCGAGGTGCACTACCGGCRNG | GGCCAGAGtGtGtGtGtGtGtGtG  | + | 5 | 2 | 10 | 0.91 | 4.68 |
| Chr1:3849157-3849179      | 5 | RNA | GGCCGAGGTGCACTACCGGCRNG | GtAGtGtGtGtGtGtGtGtGtG    | + | 4 | 2 | 10 | 0.91 | 4.68 |
| Chr4:238876534-238876556  | 3 | RNA | GGCCGAGGTGCACTACCGGCRNG | GGCCAGtGtGtGtGtGtGtGtG    | + | 5 | 2 | 10 | 0.91 | 4.68 |
| Chr8:78722620-78722642    | 2 | RNA | GGCCGAGGTGCACTACCGGCRNG | tCCGAG-CaGtTaaCGCGAG      | + | 5 | 2 | 10 | 0.91 | 4.68 |
| Chr4:144606847-144606869  | 2 | RNA | GGCCGAGGTGCACTACCGGCRNG | GaCCAGG-GCaAGCaAGG        | + | 5 | 1 | 10 | 0.91 | 4.68 |
| Chr5:78742960-78742982    | 3 | RNA | GGCCGAGGTGCACTACCGGCRNG | c-CGAGtGtGtGtGtGtGtGtG    | + | 5 | 2 | 10 | 0.91 | 4.68 |
| Chr8:96590069-96590091    | 3 | X   | GGCCGAGGTGCACTACCGGCRNG | GtCCaAGGCaAGtCaCGCGGG     | - | 5 | 0 | 10 | 0.91 | 4.68 |
| Chr1:163321856-163321878  | 2 | RNA | GGCCGAGGTGCACTACCGGCRNG | tGtCGAGtGtGtGtGtGtGtGtG   | + | 5 | 2 | 10 | 0.91 | 4.68 |
| Chr2:99680837-99680859    | 3 | RNA | GGCCGAGGTGCACTACCGGCRNG | GGC-TCaCCaACCGGCaAG       | + | 5 | 1 | 10 | 0.91 | 4.68 |
| Chr2:23191085-23191107    | 4 | RNA | GGCCGAGGTGCACTACCGGCRNG | tCCCGAGGtGtGtGtGtGtGtGtG  | + | 5 | 2 | 10 | 0.91 | 4.68 |
| Chr5:61784087-61784109    | 4 | RNA | GGCCGAGGTGCACTACCGGCRNG | G-aCGGtGTCaCaAGgCGGG      | + | 5 | 1 | 10 | 0.91 | 4.68 |
| Chr1:246411365-246411387  | 3 | RNA | GGCCGAGGTGCACTACCGGCRNG | GtCGAHTGtGtGtGtGtGtGtG    | - | 5 | 2 | 10 | 0.91 | 4.68 |
| Chr9:87557604-87557626    | 2 | DNA | GGCCGAGGTGCACTACCGGCRNG | GHtCGAGTtGtGtGtGtGtGtGtG  | - | 5 | 1 | 10 | 0.91 | 4.68 |
| Chr7:138229160-138229182  | 3 | RNA | GGCCGAGGTGCACTACCGGCRNG | tcCGGtGtGtGtGtGtGtGtG     | + | 5 | 2 | 10 | 0.91 | 4.68 |
| Chr4:139245577-139245599  | 3 | RNA | GGCCGAGGTGCACTACCGGCRNG | GaGCGAG-gCaACCGGCTGG      | + | 4 | 2 | 10 | 0.91 | 4.68 |
| Chr3:98763891-98763913    | 3 | RNA | GGCCGAGGTGCACTACCGGCRNG | cGaCGGtGtGtGtGtGtGtGtG    | + | 4 | 2 | 10 | 0.91 | 4.68 |
| Chr8:69628163-69628185    | 2 | DNA | GGCCGAGGTGCACTACCGGCRNG | GtCGtCaTtGtGtTtCCCGGAGG   | + | 5 | 2 | 10 | 0.91 | 4.68 |
| Chr7:11948366-11948388    | 3 | RNA | GGCCGAGGTGCACTACCGGCRNG | GTCCG-gTgCaACCGGAGT       | + | 5 | 2 | 10 | 0.91 | 4.68 |
| Chr7:180826397-180826419  | 4 | DNA | GGCCGAGGTGCACTACCGGCRNG | GGCaAGGtGtGtGtGtGtGtGtG   | - | 5 | 1 | 10 | 0.91 | 4.68 |
| Chr7:14948844-14948866    | 4 | RNA | GGCCGAGGTGCACTACCGGCRNG | GtCGAGTtGtGtGtGtGtGtGtG   | + | 5 | 2 | 10 | 0.91 | 4.68 |
| Chr1:74178877417909       | 2 | RNA | GGCCGAGGTGCACTACCGGCRNG | GGC-gGtGtGtGtGtGtGtGtG    | + | 5 | 2 | 10 | 0.91 | 4.68 |
| Chr6:118300599-118300621  | 4 | RNA | GGCCGAGGTGCACTACCGGCRNG | GGC-tGtGtGtGtGtGtGtGtG    | - | 5 | 2 | 10 | 0.91 | 4.68 |
| Chr3:77262867-77262889    | 4 | RNA | GGCCGAGGTGCACTACCGGCRNG | G-aCGGtGTCaCaAGgCGGG      | + | 5 | 1 | 10 | 0.91 | 4.68 |
| Chr9:27097749-27097771    | 3 | X   | GGCCGAGGTGCACTACCGGCRNG | GaCGAGtGtGtGtGtGtGtGtG    | + | 5 | 0 | 10 | 0.91 | 4.68 |
| Chr4:151090887-151090909  | 2 | RNA | GGCCGAGGTGCACTACCGGCRNG | GGCCAGGCaCaAGCaAGG        | + | 4 | 2 | 10 | 0.91 | 4.68 |
| Chr4:141042986-141043008  | 4 | RNA | GGCCGAGGTGCACTACCGGCRNG | G-aCGGtGTCaCaAGgCGGG      | + | 5 | 1 | 1  | 8.26 | 4.63 |
| Chr2:40890230-40890252    | 2 | DNA | GGCCGAGGTGCACTACCGGCRNG | GtCCCGAGtCaACTACCGCGGG    | + | 4 | 1 | 3  | 6.06 | 4.53 |
| Chr3:22778973-22778995    | 3 | RNA | GGCCGAGGTGCACTACCGGCRNG | GGCaAGGtGtGtGtGtGtGtGtG   | - | 5 | 1 | 3  | 6.06 | 4.53 |
| Chr1:20944079-20944101    | 3 | RNA | GGCCGAGGTGCACTACCGGCRNG | GgGtCGAG-CtCGtCCCGGG      | + | 5 | 2 | 9  | 6.00 | 4.50 |
| Chr1:103537851-10353803   | 3 | RNA | GGCCGAGGTGCACTACCGGCRNG | GGCCGAGGTGCACTACCGGCRNG   | + | 5 | 2 | 9  | 6.00 | 4.50 |
| Chr7:69146911-69146933    | 5 | RNA | GGCCGAGGTGCACTACCGGCRNG | GtCGtGtGtGtGtGtGtGtG      | + | 4 | 2 | 9  | 0.00 | 4.50 |
| Chr3:57766932-57766954    | 3 | RNA | GGCCGAGGTGCACTACCGGCRNG | cGtCaAGGtGtGtGtGtGtGtG    | + | 5 | 1 | 9  | 0.00 | 4.50 |
| Chr7:58504461-58504483    | 3 | RNA | GGCCGAGGTGCACTACCGGCRNG | GGCCAGTtGtGtGtGtGtGtGtG   | + | 5 | 2 | 9  | 0.00 | 4.50 |
| Chr7:113839294-113839316  | 3 | RNA | GGCCGAGGTGCACTACCGGCRNG | aaCCGAGGtGtGtGtGtGtGtG    | + | 5 | 2 | 9  | 0.00 | 4.50 |
| Chr2:79782349-79782371    | 3 | RNA | GGCCGAGGTGCACTACCGGCRNG | GtGcG-GGCaCCcCGCGGG       | + | 5 | 1 | 9  | 0.00 | 4.50 |
| Chr9:149956927-149956949  | 3 | RNA | GGCCGAGGTGCACTACCGGCRNG | GGtCGGtGtGtGtGtGtGtG      | + | 5 | 2 | 9  | 0.00 | 4.50 |
| Chr6:40897005-40897027    | 5 | RNA | GGCCGAGGTGCACTACCGGCRNG | t-CGAGTtCaACTCaAGCGGG     | + | 5 | 2 | 9  | 0.00 | 4.50 |
| Chr6:98810749-98810771    | 5 | RNA | GGCCGAGGTGCACTACCGGCRNG | GtCGAGTtGtGtGtGtGtGtG     | - | 3 | 1 | 9  | 0.00 | 4.50 |
| Chr10:73879415-73879437   | 3 | RNA | GGCCGAGGTGCACTACCGGCRNG | GGCCGtGtGtGtGtGtGtGtG     | + | 5 | 2 | 9  | 0.00 | 4.50 |
| Chr4:65946711-65946733    | 5 | RNA | GGCCGAGGTGCACTACCGGCRNG | GtCGtGtGtGtGtGtGtGtG      | + | 4 | 2 | 9  | 0.00 | 4.50 |
| Chr8:132746557-132746679  | 5 | RNA | GGCCGAGGTGCACTACCGGCRNG | GGC-AGtGtGtGtGtGtGtGtG    | - | 4 | 2 | 9  | 0.00 | 4.50 |
| Chr5:16072605-16072627    | 3 | RNA | GGCCGAGGTGCACTACCGGCRNG | tGC-AaGtTaaCaACCGCGGG     | + | 5 | 2 | 9  | 0.00 | 4.50 |
| Chr2:216933376-216933398  | 3 | RNA | GGCCGAGGTGCACTACCGGCRNG | GGCCAGGtGtGtGtGtGtGtG     | + | 5 | 2 | 9  | 0.00 | 4.50 |
| Chr1:3030226-3030248      | 5 | RNA | GGCCGAGGTGCACTACCGGCRNG | GaCaAGTtGtGtGtGtGtGtG     | - | 5 | 2 | 9  | 0.00 | 4.50 |
| Chr3:162654656-162654678  | 3 | DNA | GGCCGAGGTGCACTACCGGCRNG | tGCAG                     |   |   |   |    |      |      |

|                           |   |     |                         |                          |   |   |   |   |      |      |
|---------------------------|---|-----|-------------------------|--------------------------|---|---|---|---|------|------|
| Chr2:202024331-202024353  | 3 | RNA | GGCCGAGGTGCACTACCGGNGR  | GGC-tcGgGACTACCGTGG      | + | 5 | 2 | 9 | 0.00 | 4.50 |
| Chr5:209656316-209656338  | 4 | RNA | GGCCGAGGTGCACTACCGGNGR  | GGCCtctGCTGCTT-GGCCAG    | - | 5 | 2 | 0 | 8.81 | 4.41 |
| Chr7:73014290-73014321    | 3 | RNA | GGCCGAGGTGCACTACCGGNGR  | aGCCAGGgG-CgCaACtCGTGG   | - | 4 | 1 | 0 | 8.81 | 4.41 |
| Chr10:83133264-83133286   | 3 | RNA | GGCCGAGGTGCACTACCGGNGR  | G-CIAGTTCGgACCGTCCGG     | + | 5 | 2 | 0 | 8.81 | 4.41 |
| Chr5:188279279-188279301  | 3 | DNA | GGCCGAGGTGCACTACCGGNGR  | gSctCGgGcGCACACCGCCGG    | - | 5 | 1 | 0 | 8.81 | 4.41 |
| Chr10:11351315-11351337   | 3 | RNA | GGCCGAGGTGCACTACCGGNGR  | GGC-tcGgGACTACCGTGG      | - | 4 | 1 | 0 | 8.81 | 4.41 |
| Chr8:107236058-107236080  | 3 | RNA | GGCCGAGGTGCACTACCGGNGR  | GGC-tcGgGACTACCGTGG      | - | 4 | 2 | 0 | 8.81 | 4.41 |
| Chr7:92808129-92808147    | 2 | RNA | GGCCGAGGTGCACTACCGGNGR  | GCCaHgcCACTACCC-CAGG     | + | 5 | 2 | 0 | 8.81 | 4.41 |
| Chr6:112250306-112250328  | 2 | RNA | GGCCGAGGTGCACTACCGGNGR  | GGCC-gTgCAcACCGGcAG      | + | 5 | 2 | 0 | 8.81 | 4.41 |
| Chr5:147641274-147641296  | 3 | X   | GGCCGAGGTGCACTACCGGNGR  | GGaCAGGTG-GaCAcAgCaGAG   | + | 5 | 0 | 0 | 8.81 | 4.41 |
| Chr4:176279491-176279513  | 5 | RNA | GGCCGAGGTGCACTACCGGNGR  | GGCC-gTgCAcACCGGcAG      | - | 5 | 2 | 0 | 8.81 | 4.41 |
| Chr8:78639353-78639375    | 3 | RNA | GGCCGAGGTGCACTACCGGNGR  | G-aCGgGTGcGcAGcAgCGGG    | - | 5 | 1 | 0 | 8.81 | 4.41 |
| Chr1:5942859-5942881      | 4 | RNA | GGCCGAGGTGCACTACCGGNGR  | G-CGcAGGTGcGcTACCGGAGG   | - | 3 | 1 | 0 | 8.81 | 4.41 |
| Chr1:231826861-231826883  | 4 | RNA | GGCCGAGGTGCACTACCGGNGR  | tCCGtACTCGACTA-IGCTGG    | + | 5 | 2 | 0 | 8.81 | 4.41 |
| Chr1:16074689-16074711    | 5 | RNA | GGCCGAGGTGCACTACCGGNGR  | cCCCGcGTGcGtTA-GTCTGG    | + | 5 | 2 | 0 | 8.81 | 4.41 |
| Chr5:85731455-85731477    | 4 | RNA | GGCCGAGGTGCACTACCGGNGR  | G-aCGgGTGcGcAGcAgCGGG    | + | 5 | 1 | 0 | 8.81 | 4.41 |
| Chr2:193924808-193924830  | 4 | RNA | GGCCGAGGTGCACTACCGGNGR  | GGCCG-GGcCAcCAcCGCCGG    | + | 5 | 1 | 0 | 8.81 | 4.41 |
| Chr8:134545370-134545392  | 5 | RNA | GGCCGAGGTGCACTACCGGNGR  | GGCCAGGgGcCT-CgGcTGG     | - | 4 | 1 | 0 | 8.81 | 4.41 |
| Chr4:109407677-109407699  | 4 | RNA | GGCCGAGGTGCACTACCGGNGR  | GGCCaTcTG-G-TAgCaCAAG    | - | 5 | 2 | 0 | 8.81 | 4.41 |
| Chr7:54629060-54629082    | 4 | RNA | GGCCGAGGTGCACTACCGGNGR  | GGC-GAGGTGcGcCAcCaGgAG   | + | 4 | 1 | 0 | 8.81 | 4.41 |
| Chr4:101066696-101066718  | 3 | RNA | GGCCGAGGTGCACTACCGGNGR  | GGCCAGGcGCA-ActGtGGG     | + | 5 | 2 | 0 | 8.81 | 4.41 |
| Chr7:100980934-100980956  | 3 | RNA | GGCCGAGGTGCACTACCGGNGR  | aaCaAGGT-ACTACGgAGAG     | + | 5 | 2 | 0 | 8.81 | 4.41 |
| Chr2:205897453-205897475  | 2 | RNA | GGCCGAGGTGCACTACCGGNGR  | GaCCAGG-CGcAgCaGgAGG     | + | 5 | 1 | 0 | 8.81 | 4.41 |
| Chr3:83773525-83773547    | 5 | RNA | GGCCGAGGTGCACTACCGGNGR  | IGcGGG-GAgTAgcGcCGAG     | - | 5 | 2 | 0 | 8.81 | 4.41 |
| Chr7:5414793-5414815      | 5 | RNA | GGCCGAGGTGCACTACCGGNGR  | GaC-HGtGtACTACCGGcAGG    | + | 5 | 2 | 0 | 8.81 | 4.41 |
| Chr1:82848845-182848867   | 5 | RNA | GGCCGAGGTGCACTACCGGNGR  | aaCaAGGTGcGcCAcCaGgAGG   | + | 5 | 1 | 0 | 8.81 | 4.41 |
| Chr1:26682847-26682869    | 3 | RNA | GGCCGAGGTGCACTACCGGNGR  | GgCAGGTGcGcAg-GcTGG      | + | 4 | 2 | 0 | 8.81 | 4.41 |
| Chr8:165249561-165249583  | 3 | RNA | GGCCGAGGTGCACTACCGGNGR  | GGCCa-GTCCAGTAgGtGGTGG   | + | 4 | 2 | 0 | 8.81 | 4.41 |
| Chr2:143611350-143611372  | 5 | RNA | GGCCGAGGTGCACTACCGGNGR  | GGCC-gTgCAcACCGGcAG      | + | 5 | 2 | 0 | 8.81 | 4.41 |
| Chr1:17167918-17167940    | 5 | DNA | G-GCCGAGGTGCACTACCGGNGR | GGCCcAGGTGcGgGgACCGcCGG  | + | 5 | 1 | 0 | 8.81 | 4.41 |
| Chr3:141127837-141127859  | 3 | RNA | GGCCGAGGTGCACTACCGGNGR  | GGCCGAGtG-G-TgCgCAGG     | - | 5 | 2 | 0 | 8.81 | 4.41 |
| Chr1:121275645-121275667  | 5 | RNA | GGCCGAGGTGCACTACCGGNGR  | GGG-GAGcAGaActCCGCGAG    | - | 5 | 2 | 7 | 1.65 | 4.33 |
| Chr1:27905964-27905986    | 4 | RNA | GGCCGAGGTGCACTACCGGNGR  | G-aCGgGTGcGcAGcAgCGGG    | + | 5 | 1 | 8 | 0.55 | 4.28 |
| Chr4:67266523-67266545    | 2 | DNA | GGCCGAGGTGCACTACCGGNGR  | cGcCGAGTACGaaActCCGCGAG  | + | 5 | 1 | 8 | 0.55 | 4.28 |
| Chr9:96888831-96888853    | 3 | RNA | GGCCGAGGTGCACTACCGGNGR  | cCCTAGGTGcGtTg-CGAG      | + | 4 | 2 | 3 | 5.51 | 4.26 |
| Chr2:93712420-93712442    | 3 | DNA | GGCCGAGGTGCACTACCGGNGR  | cCCAGGTGcGcCAcCaGgAGG    | + | 5 | 1 | 3 | 5.51 | 4.26 |
| Chr3:176910066-176910088  | 3 | RNA | GGCCGAGGTGCACTACCGGNGR  | GgCAGGcAGTCACTAG-CAGG    | - | 3 | 1 | 5 | 3.30 | 4.15 |
| Chr10:96088780-96088802   | 4 | X   | GGCCGAGGTGCACTACCGGNGR  | GaCCAGGgGgAaTAcCGcTGG    | - | 5 | 0 | 5 | 3.30 | 4.15 |
| Chr6:83243418-83243440    | 5 | DNA | GGCCGAGGTGCACTACCGGNGR  | GGCgGgTgTgAaTACTCGcTAG   | + | 5 | 2 | 0 | 3.30 | 4.13 |
| Chr8:126721138-126721160  | 4 | DNA | GGCCGAGGTGCACTACCGGNGR  | GGCCAGTGTGcGcAGcAgGAG    | + | 5 | 1 | 0 | 8.26 | 4.13 |
| Chr8:78342334-78342356    | 3 | RNA | GGCCGAGGTGCACTACCGGNGR  | G-aCGgGTGcGcAGcAgCGGG    | - | 5 | 1 | 0 | 8.26 | 4.13 |
| Chr10:23777922-23777944   | 4 | RNA | GGCCGAGGTGCACTACCGGNGR  | GGCAGGTGcGc-CaGtTGG      | + | 5 | 2 | 0 | 8.26 | 4.13 |
| Chr8:84425660-84425682    | 5 | RNA | GGCCGAGGTGCACTACCGGNGR  | G-aGgGTGcGcAGcAgCGGG     | + | 5 | 2 | 0 | 8.26 | 4.13 |
| Chr5:121247559-121247581  | 5 | RNA | GGCCGAGGTGCACTACCGGNGR  | IGaCGAGGtGg-TAgCGGcAGG   | + | 5 | 2 | 0 | 8.26 | 4.13 |
| Chr10:56056617-56056639   | 3 | RNA | GGCCGAGGTGCACTACCGGNGR  | GaCCGgGTGcGCa-CGcGTGG    | + | 5 | 2 | 0 | 8.26 | 4.13 |
| Chr10:9235059-92350611    | 3 | RNA | GGCCGAGGTGCACTACCGGNGR  | GGC-AGcGAGTgGcCAcCGCGAG  | + | 5 | 2 | 0 | 8.26 | 4.13 |
| Chr7:160511260-160511282  | 3 | RNA | GGCCGAGGTGCACTACCGGNGR  | GaCCAGGgGgAGTAcC-CAGG    | + | 5 | 2 | 0 | 8.26 | 4.13 |
| Chr1:126987078-126987100  | 2 | RNA | GGCCGAGGTGCACTACCGGNGR  | GGC-AGGcTCAcCAcCGGcGG    | + | 5 | 2 | 0 | 8.26 | 4.13 |
| Chr2:3657200-3657222      | 4 | RNA | GGCCGAGGTGCACTACCGGNGR  | G-CGcAGGcCAcCTcGgCGGG    | + | 5 | 1 | 0 | 8.26 | 4.13 |
| Chr4:81670489-81670511    | 2 | RNA | GGCCGAGGTGCACTACCGGNGR  | GGCaAGGTG-GAGcAaCGgGAG   | + | 5 | 1 | 0 | 8.26 | 4.13 |
| Chr7:83863920-83863942    | 2 | RNA | GGCCGAGGTGCACTACCGGNGR  | GcCC-gTCCAGcTCCGCGAG     | - | 5 | 2 | 0 | 8.26 | 4.13 |
| Chr1:8847411-8847433      | 4 | RNA | GGCCGAGGTGCACTACCGGNGR  | GaCAGGAGTcGcAGcAgCGGG    | + | 5 | 2 | 0 | 8.26 | 4.13 |
| Chr1:168799184-168799206  | 3 | DNA | GGCCGAGGTGCACTACCGGNGR  | GcTCAAGGtGcGtTCCGCTGG    | + | 4 | 1 | 0 | 8.26 | 4.13 |
| Chr3:28133551-28133573    | 4 | RNA | GGCCGAGGTGCACTACCGGNGR  | GGaCGAGGTGcGcCAcCGCGGG   | + | 4 | 2 | 0 | 8.26 | 4.13 |
| Chr10:85106064-85106086   | 5 | RNA | GGCCGAGGTGCACTACCGGNGR  | GGC-AGcctCAcCTCCGCGGG    | + | 4 | 2 | 0 | 8.26 | 4.13 |
| Chr1:9346070-9346092      | 3 | RNA | GGCCGAGGTGCACTACCGGNGR  | GgCAGGcAGTCAcCGCGAG      | + | 5 | 2 | 0 | 8.26 | 4.13 |
| Chr10:87882332-87882354   | 5 | RNA | GGCCGAGGTGCACTACCGGNGR  | GcCAGcAGc-GACTACCGTGG    | + | 4 | 2 | 0 | 8.26 | 4.13 |
| Chr4:22819996-22820018    | 5 | RNA | GGCCGAGGTGCACTACCGGNGR  | GgCAGGAGTcGcTtCC-CAGG    | + | 5 | 2 | 0 | 8.26 | 4.13 |
| Chr5:148957471-148957493  | 4 | RNA | GGCCGAGGTGCACTACCGGNGR  | GtGtAGTcGcGcCTGcCC-CGGG  | + | 5 | 2 | 0 | 8.26 | 4.13 |
| Chr6:96825790-96825812    | 5 | DNA | GGC-CGAGGTGCACTACCGGNGR | GcCTGgGgAGTcTCCGCTGG     | + | 5 | 1 | 0 | 8.26 | 4.13 |
| Chr9:25819071-25819093    | 5 | RNA | GGCCGAGGTGCACTACCGGNGR  | GGC-HtGgGACTACCGTGG      | + | 5 | 2 | 0 | 8.26 | 4.13 |
| Chr1:28667288-28667310    | 4 | RNA | GGCCGAGGTGCACTACCGGNGR  | cCCCGAGG-cAACTAgTgCCAG   | + | 5 | 1 | 0 | 8.26 | 4.13 |
| Chr5:190521127-190521149  | 5 | RNA | GGCCGAGGTGCACTACCGGNGR  | GcCAGGcAGcAGC-CGcTAGG    | - | 5 | 2 | 0 | 8.26 | 4.13 |
| Chr5:86294324-86294346    | 5 | RNA | GGCCGAGGTGCACTACCGGNGR  | IgCt-cTtGACTACCGGCTGG    | + | 5 | 1 | 0 | 8.26 | 4.13 |
| Chr6:130743476-130743498  | 3 | RNA | GGCCGAGGTGCACTACCGGNGR  | G-CcGgGTGcGCa-CcGgGTGG   | + | 5 | 1 | 0 | 8.26 | 4.13 |
| Chr1:12846165-12846187    | 2 | RNA | GGCCGAGGTGCACTACCGGNGR  | GGaCAGGAGT-GACTACCGGAG   | + | 5 | 2 | 0 | 8.26 | 4.13 |
| Chr5:129459716-129459738  | 4 | RNA | GGCCGAGGTGCACTACCGGNGR  | G-aCGgGTGcGcAGcAgCGGG    | + | 5 | 1 | 0 | 8.26 | 4.13 |
| Chr1:274397528-274397550  | 2 | RNA | GGCCGAGGTGCACTACCGGNGR  | GGCC-AGGcGcGcGgCCGCGGG   | - | 4 | 1 | 0 | 8.26 | 4.13 |
| Chr10:3723842-3723864     | 5 | RNA | GGCCGAGGTGCACTACCGGNGR  | GGCgGcGcGcG-C-aCCCGTGG   | + | 5 | 2 | 0 | 8.26 | 4.13 |
| Chr9:12599199-12599221    | 5 | RNA | GGCCGAGGTGCACTACCGGNGR  | GGCCcGcGT-GAGTCAcGgGAG   | + | 5 | 1 | 0 | 8.26 | 4.13 |
| Chr7:80448651-80448673    | 2 | DNA | GGC-CGAGGTGCACTACCGGNGR | GaCAACGgGTGcAGcAgCGGG    | + | 5 | 0 | 0 | 8.26 | 4.13 |
| Chr8:95012880-95012902    | 4 | RNA | GGCCGAGGTGCACTACCGGNGR  | GtCCcGG-GaTaaCCCGCGAG    | - | 5 | 2 | 0 | 8.26 | 4.13 |
| Chr8:142802791-142802813  | 3 | RNA | GGCCGAGGTGCACTACCGGNGR  | G-aCAGGTCAcCAcCGGcGGG    | + | 5 | 1 | 0 | 8.26 | 4.13 |
| Chr3:28930689-28930711    | 2 | RNA | GGCCGAGGTGCACTACCGGNGR  | GGCC-gTgCAcACCGGAGT      | + | 5 | 2 | 0 | 8.26 | 4.13 |
| Chr3:89804446-89804468    | 4 | RNA | GGCCGAGGTGCACTACCGGNGR  | GCC-HtGgGACTACCGGCTGG    | - | 3 | 2 | 0 | 8.26 | 4.13 |
| Chr2:60165521-60165543    | 3 | DNA | GGC-CGAGGTGCACTACCGGNGR | GaCaCGgGTGcGcAGcAgCGGG   | + | 5 | 2 | 0 | 8.26 | 4.13 |
| Chr4:23772825-23772847    | 4 | RNA | GGCCGAGGTGCACTACCGGNGR  | GGC-CAGGcGcT-TgCCGAGG    | + | 5 | 2 | 0 | 8.26 | 4.13 |
| Chr6:162934695-162934717  | 4 | DNA | GGC-CGAGGTGCACTACCGGNGR | GcCTGAGGcATtTCCGCTGG     | - | 5 | 1 | 0 | 8.26 | 4.13 |
| Chr1:223867058-223867080  | 5 | DNA | GGC-CGAGGTGCACTACCGGNGR | GGCCTGgGgGtCAcCCCGGAG    | + | 5 | 2 | 0 | 8.26 | 4.13 |
| Chr9:147054948-147054970  | 4 | RNA | GGCCGAGGTGCACTACCGGNGR  | G-aCGgGTGcGcAGcAgCGGG    | + | 5 | 1 | 0 | 8.26 | 4.13 |
| Chr7:111060700-111060722  | 3 | RNA | GGCCGAGGTGCACTACCGGNGR  | GGCC-gTgCAcACCGGcAG      | + | 5 | 2 | 0 | 8.26 | 4.13 |
| Chr6:163883708-163883730  | 2 | RNA | GGCCGAGGTGCACTACCGGNGR  | GaCaAGGAGcGc-G-aCCGGAAG  | + | 5 | 2 | 0 | 8.26 | 4.13 |
| Chr8:104410705-104410727  | 4 | RNA | GGCCGAGGTGCACTACCGGNGR  | GcCAGGcAGcAGC-CGcTAGG    | - | 5 | 2 | 0 | 8.26 | 4.13 |
| Chr5:205212791-205212813  | 4 | RNA | GGCCGAGGTGCACTACCGGNGR  | G-CcCaAGTAcCAcCTCGCTGG   | + | 5 | 1 | 0 | 8.26 | 4.13 |
| Chr10:15875069-15875091   | 3 | RNA | GGCCGAGGTGCACTACCGGNGR  | GaCaAGGTGcGcAGcAgCGGG    | + | 5 | 1 | 0 | 8.26 | 4.13 |
| Chr7:43839142-43839164    | 4 | RNA | GGCCGAGGTGCACTACCGGNGR  | GGCCGAGGcAGTAcCGGAG      | + | 5 | 2 | 0 | 8.26 | 4.13 |
| Chr6:138881986-138882008  | 5 | DNA | GGCCGAGGTGCACTACCGGNGR  | GgCgAGGgGcCTTAgGcGCGGG   | + | 5 | 1 | 8 | 0.00 | 4.00 |
| Chr1:137743674-137743696  | 3 | RNA | GGCCGAGGTGCACTACCGGNGR  | GGCCGAGG-GgagTTCGcGCTGG  | + | 4 | 2 | 8 | 0.00 | 4.00 |
| Chr5:54424582-54424604    | 5 | RNA | GGCCGAGGTGCACTACCGGNGR  | cCCCGAGG-AcCAcGgCGGG     | - | 5 | 2 | 8 | 0.00 | 4.00 |
| Chr7:25947108-25947130    | 5 | RNA | GGCCGAGGTGCACTACCGGNGR  | GGCCAGGTGcGcT-CgGcTAG    | + | 5 | 1 | 8 | 0.00 | 4.00 |
| Chr2:205493225-205493247  | 3 | RNA | GGCCGAGGTGCACTACCGGNGR  | GtCtGgGT-GaCAcCCGCGAG    | + | 5 | 1 | 8 | 0.00 | 4.00 |
| Chr6:135951500-135951522  | 5 | RNA | GGCCGAGGTGCACTACCGGNGR  | GaCAAGG-GACTAggAGTAG     | + | 5 | 2 | 8 | 0.00 | 4.00 |
| Chr10:52256073-52256095   | 5 | RNA | GGCCGAGGTGCACTACCGGNGR  | GGCCgGc-GCACTgGcGgAAGG   | - | 5 | 2 | 8 | 0.00 | 4.00 |
| Chr8:20984843-20984865    | 5 | RNA | GGCCGAGGTGCACTACCGGNGR  | GtCtGgGT-GaCAcCCGCGGG    | - | 5 | 1 | 8 | 0.00 | 4.00 |
| Chr10:122462295-122462317 | 3 | RNA | GGCCGAGGTGCACTACCGGNGR  | Gg-GaCgGTAGcAGcAgCGGG    | + | 5 | 2 | 8 | 0.00 | 4.00 |
| Chr3:12624066-12624088    | 3 | RNA | GGCCGAGGTGCACTACCGGNGR  | a-CGgGTGcGcAGcAgCGGG     | + | 5 | 2 | 8 | 0.00 | 4.00 |
| Chr3:76958153-76958175    | 5 | RNA | GGCCGAGGTGCACTACCGGNGR  | GGCCGAGGcAGC-TgCgGAGG    | + | 5 | 2 | 8 | 0.00 | 4.00 |
| Chr9:65249312-65249334    | 3 | RNA | GGCCGAGGTGCACTACCGGNGR  | G-CAGGtGcAGGgGcGgTGG     | + | 5 | 2 | 8 | 0.00 | 4.00 |
| Chr1:205586244-205586266  | 5 | RNA | GGCCGAGGTGCACTACCGGNGR  | GgC-GgGcGTGcAGcAgCGGG    | - | 4 | 1 | 8 | 0.00 | 4.00 |
| Chr1:27030293-27030315    | 3 | RNA | GGCCGAGGTGCACTACCGGNGR  | G-GAGGAGcAGgAGcGgAGAG    | + | 5 | 2 | 8 | 0.00 | 4.00 |
| Chr4:179369305-179369327  | 5 | DNA | GGCCGAGGTGCACTACCGGNGR  | aGCCAGGTGcGcT-AGcTAgCGGG | + | 5 | 2 | 8 | 0.00 | 4.00 |
| Chr2:97653979-97654001    | 3 | DNA | GGCCGAGGTGCACTACCGGNGR  | GcCCAGcTGCcTACCCCGTAG    | + | 5 | 2 | 8 | 0.00 | 4.00 |
| Chr1:254800155-254800177  | 5 | RNA | GGCCGAGGTGCACTACCGGNGR  | G-CGtGcGcGc              |   |   |   |   |      |      |

|                           |   |     |                         |                          |   |   |   |   |      |      |
|---------------------------|---|-----|-------------------------|--------------------------|---|---|---|---|------|------|
| Chr8:18781622-18781644    | 5 | RNA | GGCCAGAGTGCATACCGGCRNG  | GGCCaAGCGGCG-gACCGCGGG   | - | 5 | 2 | 8 | 0.00 | 4.00 |
| Chr10:110702323-110702345 | 3 | DNA | GGCCAGAGTGCATACCGGCRNG  | GcTCCAGAGGCAcCccGGCGGG   | + | 5 | 1 | 8 | 0.00 | 4.00 |
| Chr5:161945647-161945669  | 5 | DNA | GGCCAGAGTGCATACCGGCRNG  | GCCCGAGGTGCcTtCCaGCGAG   | - | 5 | 1 | 8 | 0.00 | 4.00 |
| Chr1:194552141-194552163  | 3 | RNA | GGCCAGAGTGCATACCGGCRNG  | GG-GAGAGGgATaCgGGCAAG    | + | 5 | 2 | 8 | 0.00 | 4.00 |
| Chr5:4113674-4113696      | 5 | RNA | GGCCAGAGTGCATACCGGCRNG  | GGCCCGAGgAtAcAG-GCAGG    | - | 5 | 2 | 8 | 0.00 | 4.00 |
| Chr8:14179679-14179686    | 5 | RNA | GGCCAGAGTGCATACCGGCRNG  | GGCCAGAGTGCATACCGGCRNG   | + | 5 | 2 | 8 | 0.00 | 4.00 |
| Chr10:91548575-91548597   | 3 | RNA | GGCCAGAGTGCATACCGGCRNG  | GGCC-gcGGGACTACCGGCTGG   | + | 4 | 2 | 8 | 0.00 | 4.00 |
| Chr5:11905700-11905722    | 5 | DNA | GGCCAGAGTGCATACCGGCRNG  | cGCGCGAGTGCATACCGGCAAG   | - | 5 | 1 | 8 | 0.00 | 4.00 |
| Chr6:3324436-3324458      | 3 | DNA | GGCCAGAGTGCATACCGGCRNG  | GGCCAGAGTGCATACCGGCTGG   | - | 3 | 1 | 8 | 0.00 | 4.00 |
| Chr5:102936921-102936943  | 3 | RNA | GGCCAGAGTGCATACCGGCRNG  | GGCCGgG-TgPaACT-CCGaCTAG | + | 5 | 1 | 0 | 7.71 | 3.86 |
| Chr10:59019062-59019084   | 3 | DNA | GGC-GAGGTTGCATACCGGCRNG | GaCAAGCGGTGCAGcAgaCGGGG  | - | 5 | 2 | 0 | 7.71 | 3.86 |
| Chr5:22797751-22797773    | 5 | DNA | GGCCAGAGTGCATACCGGCRNG  | GgHgAGGTTGCTCTCCGGCAGG   | - | 5 | 2 | 0 | 7.71 | 3.86 |
| Chr2:209209610-209209632  | 2 | RNA | GGCCAGAGTGCATACCGGCRNG  | aGCGGgGG-GAaTcCTGGCGGG   | + | 5 | 2 | 0 | 7.71 | 3.86 |
| Chr2:42120543-42120565    | 4 | RNA | GGCCAGAGTGCATACCGGCRNG  | GGaCGAGTGG-TTcGGGCGGAG   | + | 5 | 2 | 0 | 7.71 | 3.86 |
| Chr10:150122156-150122178 | 2 | RNA | GGCCAGAGTGCATACCGGCRNG  | aGCCAGAGTGCATGgGgGgG     | - | 4 | 1 | 0 | 7.71 | 3.86 |
| Chr10:63152603-63152625   | 4 | RNA | GGCCAGAGTGCATACCGGCRNG  | GGC-tGcGGACTACCGGCTGG    | - | 4 | 2 | 0 | 7.71 | 3.86 |
| Chr3:188615147-188615169  | 3 | RNA | GGCCAGAGTGCATACCGGCRNG  | yGCCGAGTgAG-CACGCGGAG    | + | 5 | 2 | 0 | 7.71 | 3.86 |
| Chr5:11129257-111129279   | 3 | DNA | GGC-GAGGTTGCATACCGGCRNG | GcCTCGGgGgCaACcCGGGCGGG  | - | 5 | 2 | 0 | 7.71 | 3.86 |
| Chr3:147343929-147343951  | 3 | RNA | GGCCAGAGTGCATACCGGCRNG  | eGAcGGGTGCAGCaC-GaGAG    | + | 5 | 2 | 0 | 7.71 | 3.86 |
| Chr5:205698867-205698889  | 3 | RNA | GGCCAGAGTGCATACCGGCRNG  | GaCa-GGTGCAGCaCgAGGGG    | - | 5 | 1 | 0 | 7.71 | 3.86 |
| Chr4:171574757-171574779  | 3 | RNA | GGCCAGAGTGCATACCGGCRNG  | G-aCGGGTGCAGCaCgAGGGG    | - | 5 | 1 | 0 | 7.71 | 3.86 |
| Chr10:97282160-97282182   | 2 | RNA | GGCCAGAGTGCATACCGGCRNG  | Gg-GAGGTGGTgTgGgAGG      | + | 5 | 2 | 0 | 7.71 | 3.86 |
| Chr7:10258808-10258830    | 5 | RNA | GGCCAGAGTGCATACCGGCRNG  | tGCTGAGTgGATtACC-tGAG    | + | 5 | 2 | 0 | 7.71 | 3.86 |
| Chr10:129800836-129800858 | 3 | RNA | GGCCAGAGTGCATACCGGCRNG  | GGC-tcGGGACTACCGGCTGG    | - | 4 | 2 | 0 | 7.71 | 3.86 |
| Chr10:147635855-147635877 | 5 | RNA | GGCCAGAGTGCATACCGGCRNG  | GGC-tcGGGACTACCGGCTGG    | + | 5 | 2 | 0 | 7.71 | 3.86 |
| Chr1:10098373-10098395    | 2 | RNA | GGCCAGAGTGCATACCGGCRNG  | GGCCAGAGTGCATACCGGCRNG   | + | 5 | 2 | 0 | 7.71 | 3.86 |
| Chr10:139168803-139168825 | 2 | DNA | GGCCAGAGTGCATACCGGCRNG  | GGCCAGAGTGCAGgGgGgCCTCGG | - | 5 | 2 | 0 | 7.71 | 3.86 |
| Chr2:66966821-66966843    | 2 | RNA | GGCCAGAGTGCATACCGGCRNG  | GGC-AGTCGAGgAaCgAGCTGG   | - | 5 | 2 | 0 | 7.71 | 3.86 |
| Chr3:212883751-212883773  | 2 | RNA | GGCCAGAGTGCATACCGGCRNG  | GGCCAGC-gACTACCGGCTGG    | + | 3 | 2 | 0 | 7.71 | 3.86 |
| Chr5:93592105-93592127    | 3 | RNA | GGCCAGAGTGCATACCGGCRNG  | GGCCAGCgG-CtTgCCcCGG     | - | 5 | 2 | 0 | 7.71 | 3.86 |
| Chr5:148721181-148721203  | 3 | RNA | GGCCAGAGTGCATACCGGCRNG  | GGCCGtGGTgAG-AaCgGCGG    | - | 5 | 2 | 0 | 7.71 | 3.86 |
| Chr2:35713287-35713309    | 5 | RNA | GGCCAGAGTGCATACCGGCRNG  | GgCtGgGgA-gACTACCGGgAGG  | + | 5 | 2 | 0 | 7.71 | 3.86 |
| Chr5:123207231-123207253  | 2 | RNA | GGCCAGAGTGCATACCGGCRNG  | GgCtGgGtCA-gACTACCGGgAGG | - | 5 | 2 | 0 | 7.71 | 3.86 |
| Chr2:78413225-78413247    | 4 | DNA | GGC-GAGGTTGCATACCGGCRNG | GgCCTCGGgGgCaACcCGGGCGGG | - | 5 | 2 | 0 | 7.71 | 3.86 |
| Chr3:39499815-39499837    | 3 | RNA | GGCCAGAGTGCATACCGGCRNG  | GgCaAGTGG-ACTTcGtGCGAG   | - | 5 | 2 | 0 | 7.71 | 3.86 |
| Chr1:15122793-15122815    | 3 | DNA | GGC-GAGGTTGCATACCGGCRNG | GCTCGgGtGGTcTCCGCTGGTGG  | + | 5 | 1 | 0 | 7.71 | 3.86 |
| Chr10:128767734-128767756 | 5 | RNA | GGCCAGAGTGCATACCGGCRNG  | GgGcCG-GCaCAGcTCCCGGGGG  | + | 5 | 1 | 0 | 7.71 | 3.86 |
| Chr2:182828126-182828148  | 3 | RNA | GGCCAGAGTGCATACCGGCRNG  | GTCGc-gTgCaACCGGAGAG     | - | 5 | 2 | 0 | 7.71 | 3.86 |
| Chr2:126913098-126913120  | 3 | RNA | GGCCAGAGTGCATACCGGCRNG  | eGCCGAG-gTACCaACCGGATGG  | - | 5 | 1 | 0 | 7.71 | 3.86 |
| Chr3:209871649-209871671  | 4 | DNA | GGCCAGAGTGCATACCGGCRNG  | GgGcCGGgTGGcGAGCaGGCGAG  | - | 5 | 2 | 0 | 7.71 | 3.86 |
| Chr3:57466224-57466246    | 4 | RNA | GGCCAGAGTGCATACCGGCRNG  | GaCCAAGTCAACTACT-CAGG    | + | 5 | 2 | 0 | 7.71 | 3.86 |
| Chr1:102297391-102297413  | 4 | RNA | GGCCAGAGTGCATACCGGCRNG  | GaCCAGGAGcTtTACC-aTGG    | + | 5 | 2 | 0 | 7.71 | 3.86 |
| Chr1:129682246-129682268  | 3 | RNA | GGCCAGAGTGCATACCGGCRNG  | GGCCGgGgGATACT-cGGGAGG   | - | 5 | 1 | 0 | 7.71 | 3.86 |
| Chr7:52124860-52124882    | 5 | RNA | GGCCAGAGTGCATACCGGCRNG  | GgCGGgGgTGG-TgCGGGGGG    | + | 5 | 2 | 0 | 7.71 | 3.86 |
| Chr10:53136815-53136837   | 5 | RNA | GGCCAGAGTGCATACCGGCRNG  | CaCAAGTCTGGcT-CGGCTAG    | + | 5 | 1 | 0 | 7.71 | 3.86 |
| Chr3:8327638-83276406     | 4 | RNA | GGCCAGAGTGCATACCGGCRNG  | GGCCAGAGTGCATACCGGCRNG   | + | 5 | 2 | 0 | 7.71 | 3.86 |
| Chr2:145347124-145347146  | 5 | RNA | GGCCAGAGTGCATACCGGCRNG  | GgCAGTCTGCaCaC-gCGGG     | + | 5 | 2 | 0 | 7.71 | 3.86 |
| Chr7:167250194-167250216  | 3 | RNA | GGCCAGAGTGCATACCGGCRNG  | GgGAGGgGg-GAGCgTGGCGGG   | - | 5 | 2 | 0 | 7.71 | 3.86 |
| Chr5:201556778-201556800  | 5 | RNA | GGCCAGAGTGCATACCGGCRNG  | GgGCaAGGCGAGCgTCC-CGGG   | - | 5 | 2 | 0 | 7.71 | 3.86 |
| Chr6:159401411-159401433  | 3 | RNA | GGCCAGAGTGCATACCGGCRNG  | G-aCGGGTGCAGCaCgAGGGG    | - | 5 | 1 | 0 | 7.71 | 3.86 |
| Chr10:41545147-41545169   | 3 | DNA | GGCCAGAGTGCATACCGGCRNG  | GcCGAGgCaCaCAGcGCTGGCAG  | - | 5 | 2 | 0 | 7.71 | 3.86 |
| Chr8:21977857-21977879    | 2 | DNA | GGCCAGAGTGCATACCGGCRNG  | GaCCAGGgTGCATACCGGCTGG   | + | 5 | 1 | 0 | 7.71 | 3.86 |
| Chr7:41944476-41944498    | 3 | RNA | GGCCAGAGTGCATACCGGCRNG  | GtAcG-gTGAATACGGCGGG     | - | 5 | 2 | 0 | 7.71 | 3.86 |
| Chr4:79739608-79739630    | 5 | RNA | GGCCAGAGTGCATACCGGCRNG  | GgGcCGGgTGGTCT-CGGGAGG   | + | 5 | 2 | 0 | 7.71 | 3.86 |
| Chr7:20017349-20017371    | 4 | RNA | GGCCAGAGTGCATACCGGCRNG  | GtCaAGTTCGACaC-gCAGG     | + | 5 | 2 | 0 | 7.71 | 3.86 |
| Chr5:13228441-13228463    | 3 | DNA | GGC-GAGGTTGCATACCGGCRNG | GTCAGAGTCTGGTCA-gCTCGG   | + | 5 | 1 | 0 | 7.71 | 3.86 |
| Chr6:83985168-83985190    | 2 | RNA | GGCCAGAGTGCATACCGGCRNG  | GaCAAGG-gGcGgCCGGAGG     | + | 4 | 2 | 0 | 7.71 | 3.86 |
| Chr6:86858920-86858942    | 3 | DNA | GGC-GAGGTTGCATACCGGCRNG | GgCTCGAHTTCAcACCGGCTGG   | + | 4 | 2 | 0 | 7.71 | 3.86 |
| Chr10:28362556-28362578   | 4 | RNA | GGCCAGAGTGCATACCGGCRNG  | aGCTcGGGCGACTACT-CTAG    | - | 5 | 2 | 0 | 7.71 | 3.86 |
| Chr2:39860358-39860380    | 3 | RNA | GGCCAGAGTGCATACCGGCRNG  | GgTcAGGcG-CtTCCCGGGG     | - | 5 | 2 | 0 | 7.71 | 3.86 |
| Chr4:244201160-244201182  | 4 | RNA | GGCCAGAGTGCATACCGGCRNG  | G-aCGGGTGCAGCaCgAGGGG    | - | 5 | 1 | 0 | 7.71 | 3.86 |
| Chr1:259160861-259160883  | 5 | RNA | GGCCAGAGTGCATACCGGCRNG  | GGC-tGcAGACTACCGGCTGG    | - | 5 | 2 | 0 | 7.71 | 3.86 |
| Chr9:156236554-156236576  | 4 | RNA | GGCCAGAGTGCATACCGGCRNG  | aGCCGAGGgTGG-CcCaAGGCTGG | + | 5 | 1 | 0 | 7.71 | 3.86 |
| Chr10:132199051-132199073 | 5 | RNA | GGCCAGAGTGCATACCGGCRNG  | G-CAGAGTCTGGcGgCGgAGG    | - | 5 | 2 | 0 | 7.71 | 3.86 |
| Chr6:146032127-146032149  | 3 | RNA | GGCCAGAGTGCATACCGGCRNG  | G-aCGGGTGCAGCaCgAGGGG    | - | 5 | 1 | 0 | 7.71 | 3.86 |
| Chr3:17401958-17401980    | 2 | DNA | GGC-GAGGTTGCATACCGGCRNG | GgCTCGAGGCaCAGTGGGGG     | + | 4 | 2 | 0 | 7.71 | 3.86 |
| Chr9:119038444-119038466  | 2 | DNA | GGCCAGAGTGCATACCGGCRNG  | eGCGAGTCTACTACCGGCGGG    | - | 5 | 2 | 0 | 7.71 | 3.86 |
| Chr4:21100458-21100480    | 2 | RNA | GGCCAGAGTGCATACCGGCRNG  | GGCCAGAGTgTAC-AaHGCGGG   | - | 5 | 1 | 0 | 7.71 | 3.86 |
| Chr6:165163533-165163555  | 2 | DNA | G-GCCAGAGTGCATACCGGCRNG | GGCCcTcGGGCGAGTACCGGCGAG | + | 5 | 1 | 0 | 7.71 | 3.86 |
| Chr9:133600039-133600061  | 5 | RNA | GGCCAGAGTGCATACCGGCRNG  | GGC-HtGGGACTACCGGCTGG    | + | 4 | 2 | 6 | 1.65 | 3.83 |
| Chr3:216843243-216843265  | 2 | RNA | GGCCAGAGTGCATACCGGCRNG  | GGC-gGgTgAGCaCgAGGAG     | + | 5 | 2 | 1 | 6.61 | 3.81 |
| Chr4:142295394-142295416  | 4 | RNA | GGCCAGAGTGCATACCGGCRNG  | GGC-AgGcCGAGCaACCGGCGGG  | - | 3 | 2 | 7 | 0.55 | 3.78 |
| Chr6:71670360-71670382    | 3 | RNA | GGCCAGAGTGCATACCGGCRNG  | G-CGGAGTGCATCTGGGGAGG    | - | 4 | 1 | 7 | 0.55 | 3.78 |
| Chr10:123030488-123030510 | 4 | RNA | GGCCAGAGTGCATACCGGCRNG  | Tg-GAcCTGTCaACCGGATGG    | - | 5 | 2 | 2 | 5.51 | 3.76 |
| Chr2:129356996-12936018   | 5 | RNA | GGCCAGAGTGCATACCGGCRNG  | GgGcAGGcTGCAGCaCgAGGGG   | + | 4 | 1 | 0 | 7.16 | 3.58 |
| Chr7:2230373-2230395      | 4 | RNA | GGCCAGAGTGCATACCGGCRNG  | a-CGGGCGAGGCaCAGGGGG     | + | 5 | 2 | 0 | 7.16 | 3.58 |
| Chr9:91636078-91636100    | 4 | RNA | GGCCAGAGTGCATACCGGCRNG  | G-aCGGGTGCAGCaCgAGGGG    | + | 5 | 1 | 0 | 7.16 | 3.58 |
| Chr2:8288552-8288574      | 2 | RNA | GGCCAGAGTGCATACCGGCRNG  | GaCCAGGCG-CAGCaCaGAGG    | + | 5 | 2 | 0 | 7.16 | 3.58 |
| Chr6:349520-349542        | 5 | RNA | GGCCAGAGTGCATACCGGCRNG  | GcCCAGGgGCaCaCC-gTGG     | - | 5 | 2 | 0 | 7.16 | 3.58 |
| Chr7:70339169-70339191    | 3 | RNA | GGCCAGAGTGCATACCGGCRNG  | G-aCGGGTGCAGCaCgAGGGG    | + | 5 | 1 | 0 | 7.16 | 3.58 |
| Chr6:144446673-144446695  | 3 | RNA | GGCCAGAGTGCATACCGGCRNG  | aGt-tGGTgGATACCGGCAAG    | + | 5 | 2 | 0 | 7.16 | 3.58 |
| Chr7:133222422-133222444  | 4 | RNA | GGCCAGAGTGCATACCGGCRNG  | GgGcGGcCaCaCAGCGGGGG     | - | 4 | 1 | 0 | 7.16 | 3.58 |
| Chr2:216374341-216374363  | 4 | RNA | GGCCAGAGTGCATACCGGCRNG  | GgCGGgGCTGCAG-AtcTCCGG   | - | 4 | 1 | 0 | 7.16 | 3.58 |
| Chr3:163017842-163017864  | 3 | RNA | GGCCAGAGTGCATACCGGCRNG  | G-aCGGGTGCAGCaCgAGGGG    | + | 5 | 1 | 0 | 7.16 | 3.58 |
| Chr4:28897450-28897472    | 4 | RNA | GGCCAGAGTGCATACCGGCRNG  | TGCCAGGCTG-TAGGGAGG      | - | 5 | 2 | 0 | 7.16 | 3.58 |
| Chr7:12051656-12051678    | 3 | RNA | GGCCAGAGTGCATACCGGCRNG  | GGCCAGAGTGCATACCGGCRNG   | + | 5 | 2 | 0 | 7.16 | 3.58 |
| Chr4:70715583-70715605    | 2 | RNA | GGCCAGAGTGCATACCGGCRNG  | GgCGAGAGTCTGtTGGC-CGAG   | + | 5 | 2 | 0 | 7.16 | 3.58 |
| Chr10:9074274-9074296     | 4 | RNA | GGCCAGAGTGCATACCGGCRNG  | GaCaG-GGTGCAGCaCgAGGGG   | + | 5 | 1 | 0 | 7.16 | 3.58 |
| Chr1:87264724-87264746    | 3 | RNA | GGCCAGAGTGCATACCGGCRNG  | GaCCAGGAGgGCT-CtGGCGAG   | + | 5 | 1 | 0 | 7.16 | 3.58 |
| Chr7:149461770-149461792  | 3 | RNA | GGCCAGAGTGCATACCGGCRNG  | eGCCGAG-TGATTCGGGAGG     | - | 3 | 2 | 0 | 7.16 | 3.58 |
| Chr10:67516012-67516034   | 4 | RNA | GGCCAGAGTGCATACCGGCRNG  | GTCGc-gTgCaACCGGAGAG     | - | 5 | 2 | 0 | 7.16 | 3.58 |
| Chr5:172175136-172175158  | 3 | RNA | GGCCAGAGTGCATACCGGCRNG  | GGC-tcGGGACTACCGGCTGG    | - | 5 | 2 | 0 | 7.16 | 3.58 |
| Chr7:30880933-30880955    | 3 | RNA | GGCCAGAGTGCATACCGGCRNG  | GaCaG-GTTCAGCaCgAGGGG    | + | 5 | 1 | 0 | 7.16 | 3.58 |
| Chr6:158971260-158971282  | 4 | RNA | GGCCAGAGTGCATACCGGCRNG  | GgA-aAGTGCATACTtCAAG     | + | 5 | 2 | 0 | 7.16 | 3.58 |
| Chr3:182081075-182081097  | 3 | RNA | GGCCAGAGTGCATACCGGCRNG  | GaCgGgGgGCaC-gACCGGCGG   | - | 4 | 2 | 0 | 7.16 | 3.58 |
| Chr7:34243873-34243895    | 4 | RNA | GGCCAGAGTGCATACCGGCRNG  | GaCAAGGgG-ACTACGGCGAG    | + | 4 | 1 | 0 | 7.16 | 3.58 |
| Chr7:50901975-50901997    | 2 | RNA | GGCCAGAGTGCATACCGGCRNG  | GGC-AaGTTGACTACCaGAGG    | + | 5 | 1 | 0 | 7.16 | 3.58 |
| Chr5:153506362-153506384  | 4 | RNA | GGCCAGAGTGCATACCGGCRNG  | GgCaCaG-TGACTACTtGCTGG   | + | 5 | 2 | 0 | 7.16 | 3.58 |
| Chr4:123030529-123030551  | 4 | RNA | GGCCAGAGTGCATACCGGCRNG  | Tg-GAcCTGAGgAAGCaGGCGGG  | + | 5 | 2 | 0 | 7.16 | 3.58 |
| Chr7:67571569-67571591    | 4 | DNA | GGCCAGAGTGCATACCGGCRNG  | GgGCaAGGgGtCAcAAGCGGCGAG | + | 5 | 2 | 0 | 7.16 | 3.58 |
| Chr10:33397048-33397070   | 4 | RNA | GGCCAGAGTGCATACCGGCRNG  | G-aCGAGTGCAGCaCgAGGGG    | + | 5 | 1 | 0 | 7.16 | 3.58 |
| Chr4:6330673-6330695      | 4 | RNA | GGCCAGAGTGCATACCGGCRNG  | GgCGAGgGg-GAGCaAGTGTAG   | + | 5 | 1 | 0 | 7.16 | 3.58 |
| Chr4:226502511-226502533  | 5 | RNA | GGCCAGAGTGCATACCGGCRNG  | GcCCAGAGgGCaCaCC-aTGG    | - | 5 | 2 | 0 | 7.16 | 3.58 |
| Chr4:59004096-59004118    | 5 | RNA | GGCCAGAGTGCATACCGGCRNG  | GGCCAGAGCGCaG-AggGGGAGG  | + | 5 | 2 | 0 |      |      |

|                           |           |   |     |                           |                           |   |   |   |   |      |      |
|---------------------------|-----------|---|-----|---------------------------|---------------------------|---|---|---|---|------|------|
| Chr7:22832794-22832816    | 22832799  | 3 | RNA | GGCCGAGGTGCACTACCGGNNRG   | GGCAAG--GACTACCGTGG       | - | 4 | 2 | 0 | 7.16 | 3.58 |
| Chr10:148732123-148732145 | 148732138 | 5 | RNA | GGCCGAGGTGCACTACCGGNNRG   | GGCCGAGGT-AAAAGGGaTGG     | + | 5 | 2 | 0 | 7.16 | 3.58 |
| Chr7:5877505-5877527      | 5877510   | 3 | DNA | GGCCGAGGTGCACTACCGGNNRG   | GGCCGAGTcCGCAcGaaCGCGGAG  | - | 5 | 1 | 0 | 7.16 | 3.58 |
| Chr2:17707135-17707157    | 17707141  | 4 | RNA | GGCCGAGGTGCACTACCGGNNRG   | caCAAGTGGcCT-CCGCCAG      | - | 5 | 1 | 0 | 7.16 | 3.58 |
| Chr2:55203621-55203643    | 55203628  | 5 | RNA | GGCCGAGGTGCACTACCGGNNRG   | GGaGAGGagGACT-CGaaCGG     | - | 5 | 2 | 0 | 7.16 | 3.58 |
| Chr7:2933854-2933876      | 2933870   | 4 | RNA | GGCCGAGGTGCACTACCGGNNRG   | G-aCGGAGTcGACaGaaGGGG     | + | 5 | 1 | 0 | 7.16 | 3.58 |
| Chr5:203929589-203929611  | 20392967  | 4 | RNA | GGCCGAGGTGCACTACCGGNNRG   | cGGcTcGcG--TACCGCCGG      | + | 4 | 2 | 0 | 7.16 | 3.58 |
| Chr4:220932677-220932699  | 220932605 | 2 | DNA | GGCCGAGGTGCACTACCGGNNRG   | GgGcMAGGaaGcCTACCGGCTGG   | + | 5 | 1 | 0 | 7.16 | 3.58 |
| Chr6:96275518-96275540    | 96275534  | 4 | RNA | GGCCGAGGTGCACTACCGGNNRG   | GGC-AAGcCGAggACcCGCGG     | + | 5 | 1 | 0 | 7.16 | 3.58 |
| Chr1:298705082-298705104  | 298705087 | 3 | RNA | GGCCGAGGTGCACTACCGGNNRG   | GaCCGAGGcAGcCaCa--GCAAG   | - | 5 | 2 | 0 | 7.16 | 3.58 |
| Chr4:11090905-11090927    | 11090922  | 3 | RNA | GGCCGAGGTGCACTACCGGNNRG   | GcCGAGTcGCTT--GGCAAG      | + | 5 | 2 | 0 | 7.16 | 3.58 |
| Chr3:106976798-106976820  | 106976816 | 2 | DNA | GGCCGAGGTGCACTACCGGNNRG   | cGgGgGTcCGACTACaCGCGGG    | + | 5 | 1 | 0 | 7.16 | 3.58 |
| Chr10:128414405-128414427 | 128414423 | 2 | DNA | GGCCGAGGTGCACTACCGGNNRG   | GgGtGAGGtTaATGAGCCGGCGGG  | + | 5 | 2 | 0 | 7.16 | 3.58 |
| Chr1:129829565-129829587  | 129829582 | 3 | RNA | GGCCGAGGTGCACTACCGGNNRG   | GgGcGAGGTcGcCTgT--GGCGAG  | + | 4 | 2 | 0 | 7.16 | 3.58 |
| Chr3:59076867-59076889    | 59076872  | 3 | RNA | GGCCGAGGTGCACTACCGGNNRG   | Gg--GcGgGcGACTcCGCGGG     | - | 5 | 2 | 0 | 7.16 | 3.58 |
| Chr4:151232361-151232383  | 151232377 | 4 | RNA | GGCCGAGGTGCACTACCGGNNRG   | G-aCGGAGTcCGCAcGaaCGCGG   | + | 5 | 1 | 0 | 7.16 | 3.58 |
| Chr8:79028944-79028966    | 79028949  | 4 | RNA | GGCCGAGGTGCACTACCGGNNRG   | G-CcCAAGTcGAGaACTcCGCGG   | + | 5 | 1 | 0 | 7.16 | 3.58 |
| Chr4:22645704-22645726    | 22645708  | 2 | RNA | GGCCGAGGTGCACTACCGGNNRG   | GaaAGAGTcGAC-AaCGGcCGG    | - | 4 | 1 | 6 | 1.10 | 3.55 |
| Chr6:153135198-153135220  | 153135215 | 3 | RNA | GGCCGAGGTGCACTACCGGNNRG   | GtTCaAaGcGA--ACCGCGGG     | + | 5 | 2 | 7 | 0.00 | 3.50 |
| Chr2:203927648-203927670  | 203927665 | 3 | DNA | G--GCCGAGGTcGACTACCGGNNRG | GATGaCGgGTcGACaCaaGcCGGG  | + | 5 | 2 | 7 | 0.00 | 3.50 |
| Chr5:43118194-43118216    | 43118211  | 3 | RNA | GGCCGAGGTGCACTACCGGNNRG   | GtCCc--GtTcAcACCGGcCAG    | + | 5 | 2 | 7 | 0.00 | 3.50 |
| Chr5:34213261-34213283    | 34213278  | 3 | RNA | GGCCGAGGTGCACTACCGGNNRG   | G-aCGGgGTcGACaCaaGcCGGG   | + | 5 | 1 | 7 | 0.00 | 3.50 |
| Chr1:118890949-118890971  | 118890956 | 3 | RNA | GGCCGAGGTGCACTACCGGNNRG   | GGCCGcGcGcGACTg--GGCTGG   | - | 5 | 2 | 7 | 0.00 | 3.50 |
| Chr10:50507707-50507729   | 50507714  | 5 | RNA | GGCCGAGGTGCACTACCGGNNRG   | GtCCc--GtTcAcACCGGcCAG    | + | 5 | 2 | 7 | 0.00 | 3.50 |
| Chr5:184500071-184500093  | 184500078 | 5 | RNA | GGCCGAGGTGCACTACCGGNNRG   | GtCtGgGcTgGgTcTA--GcCTGG  | - | 5 | 2 | 7 | 0.00 | 3.50 |
| Chr8:10137451-10137473    | 10137458  | 3 | RNA | GGCCGAGGTGCACTACCGGNNRG   | G-aCGGAGTcGACaCaaGcCGGG   | + | 5 | 1 | 7 | 0.00 | 3.50 |
| Chr3:12257540-12257562    | 12257557  | 3 | RNA | GGCCGAGGTGCACTACCGGNNRG   | GcCGcGgGcTcA--AaCGCGAG    | + | 5 | 2 | 7 | 0.00 | 3.50 |
| Chr5:139807793-139807815  | 139807810 | 3 | DNA | GGCCGAGGTGCACTACCGGNNRG   | GgGtGAGGtTgGACTGACcCGGCGG | + | 2 | 1 | 0 | 0.00 | 3.50 |
| Chr1:132397497-132397519  | 132397514 | 3 | RNA | GGCCGAGGTGCACTACCGGNNRG   | GcCaTAgGcA--ACTAcAGcAGG   | + | 4 | 1 | 7 | 0.00 | 3.50 |
| Chr10:75544386-75544408   | 75544403  | 3 | X   | GGCCGAGGTGCACTACCGGNNRG   | GGCCGAGGTcCGAggtGgCGAG    | + | 5 | 0 | 7 | 0.00 | 3.50 |
| Chr1:82565696-82565718    | 82565713  | 3 | RNA | GGCCGAGGTGCACTACCGGNNRG   | ctCCGtGTcA--ACCGCGAA      | + | 5 | 2 | 7 | 0.00 | 3.50 |
| Chr4:94360303-94360325    | 94360310  | 5 | DNA | GGCCGAGGTGCACTACCGGNNRG   | GtAcGAGgGaaCTcTACCGCGAG   | + | 5 | 2 | 7 | 0.00 | 3.50 |
| Chr6:6243148-6243170      | 6243155   | 5 | RNA | GGCCGAGGTGCACTACCGGNNRG   | GGCCGAGGtGgCTg--GGTGG     | - | 5 | 2 | 7 | 0.00 | 3.50 |
| Chr3:147242959-147242981  | 147242976 | 3 | RNA | GGCCGAGGTGCACTACCGGNNRG   | GGC--tGtTgATtACCGGCTGG    | + | 4 | 2 | 7 | 0.00 | 3.50 |
| Chr4:79771225-79771247    | 79771242  | 3 | RNA | GGCCGAGGTGCACTACCGGNNRG   | cCGc--GTCgGgACCGCGGG      | + | 5 | 2 | 7 | 0.00 | 3.50 |
| Chr2:21040077-21040099    | 21040084  | 3 | RNA | GGCCGAGGTGCACTACCGGNNRG   | aGcCaGg--CGAaGgGcGAGG     | + | 5 | 2 | 7 | 0.00 | 3.50 |
| Chr8:27891127-27891149    | 27891144  | 3 | RNA | GGCCGAGGTGCACTACCGGNNRG   | GGC--tcGgGcGACTcCGCTGG    | + | 5 | 2 | 7 | 0.00 | 3.50 |
| Chr9:114322401-114322423  | 114322418 | 3 | RNA | GGCCGAGGTGCACTACCGGNNRG   | GGC--AtGTCaATcHCAAG       | + | 5 | 2 | 7 | 0.00 | 3.50 |
| Chr1:96423243-96423265    | 96423250  | 5 | RNA | GGCCGAGGTGCACTACCGGNNRG   | GgGcG-GGcCaCctCGCGCGG     | + | 5 | 1 | 7 | 0.00 | 3.50 |
| Chr6:126437749-126437771  | 126437766 | 3 | RNA | GGCCGAGGTGCACTACCGGNNRG   | GGCCGAGTcG--TtGcCGAGG     | + | 5 | 2 | 7 | 0.00 | 3.50 |
| Chr4:82973383-82973405    | 82973390  | 5 | RNA | GGCCGAGGTGCACTACCGGNNRG   | Tg--GAGGaaGcAaCtCGCGAG    | + | 5 | 2 | 7 | 0.00 | 3.50 |
| Chr1:83586315-83586337    | 83586322  | 3 | RNA | GGCCGAGGTGCACTACCGGNNRG   | GaaCa-GcGTGcAaCaaGcCGGG   | - | 5 | 1 | 7 | 0.00 | 3.50 |
| Chr9:81332157-81332179    | 81332174  | 3 | RNA | GGCCGAGGTGCACTACCGGNNRG   | G-aCGGgTcGcCaCaGaaGcCGGG  | + | 5 | 1 | 7 | 0.00 | 3.50 |
| Chr2:123904469-123904491  | 123904486 | 3 | RNA | GGCCGAGGTGCACTACCGGNNRG   | G-CcGAGGcGcGcGcGcGACTGG   | + | 5 | 1 | 7 | 0.00 | 3.50 |
| Chr7:72615303-72615325    | 72615310  | 5 | RNA | GGCCGAGGTGCACTACCGGNNRG   | GGC--GAGTcGACaCaaGcGaaTAG | + | 5 | 1 | 7 | 0.00 | 3.50 |
| Chr7:89813178-89813199    | 89813195  | 3 | RNA | GGCCGAGGTGCACTACCGGNNRG   | GcCGcGAGGcGc--GACTAcCGCGG | + | 5 | 2 | 7 | 0.00 | 3.50 |
| Chr9:18535881-18535903    | 18535888  | 5 | DNA | GGCCGAGGTGCACTACCGGNNRG   | GgCaaAGTcGaaGaaAGcCGGcCGG | + | 5 | 2 | 7 | 0.00 | 3.50 |
| Chr5:98526228-98526250    | 98526245  | 3 | RNA | GGCCGAGGTGCACTACCGGNNRG   | GgGcGAG--CGACTAaagcCAGG   | + | 5 | 2 | 7 | 0.00 | 3.50 |
| Chr4:44065607-44065629    | 44065614  | 5 | DNA | GGC-CGAGGTcGACTACCGGNNRG  | GtCTGAGGcGcTcTCCGCTGG     | - | 4 | 1 | 7 | 0.00 | 3.50 |
| Chr2:14961540-14961562    | 14961557  | 3 | RNA | GGCCGAGGTGCACTACCGGNNRG   | GtGcAATcGACaCaA--GcGCGG   | + | 5 | 2 | 7 | 0.00 | 3.50 |
| Chr7:129103879-129103901  | 129103886 | 5 | RNA | GGCCGAGGTGCACTACCGGNNRG   | GGC--tcGgGACTACCGCTGG     | - | 4 | 2 | 7 | 0.00 | 3.50 |
| Chr6:154784775-154784797  | 154784782 | 5 | RNA | GGCCGAGGTGCACTACCGGNNRG   | G-CaGAGgagcACTACCGCGAG    | - | 5 | 2 | 7 | 0.00 | 3.50 |
| Chr3:171376425-171376447  | 171376442 | 3 | RNA | GGCCGAGGTGCACTACCGGNNRG   | GGcGAGGcTG--TtGaaCaGAG    | + | 5 | 2 | 7 | 0.00 | 3.50 |
| Chr7:73073809-73073831    | 73073816  | 5 | RNA | GGCCGAGGTGCACTACCGGNNRG   | cCGcG--GtCtCaTcCGCGCGG    | - | 5 | 2 | 7 | 0.00 | 3.50 |
| Chr4:7786921-7786943      | 7786938   | 3 | DNA | GGC-CGAGGTcGACTACCGGNNRG  | GtCAcGgGcCAcTcCGGCTGG     | + | 5 | 2 | 7 | 0.00 | 3.50 |
| Chr4:17065740-17065762    | 17065747  | 5 | RNA | GGCCGAGGTGCACTACCGGNNRG   | GGCCGAGGTcGAGTcCGCGGG     | + | 5 | 2 | 7 | 0.00 | 3.50 |
| Chr2:7857794-7857796      | 7857791   | 5 | DNA | GGCCGAGGTGCACTACCGGNNRG   | GcCaAAGcCaCaCctCGCGCGG    | + | 5 | 2 | 7 | 0.00 | 3.50 |
| Chr8:46329914-46329936    | 46329931  | 3 | RNA | GGCCGAGGTGCACTACCGGNNRG   | GtCCGtHtGAGTaa--GaCGCG    | + | 5 | 2 | 7 | 0.00 | 3.50 |
| Chr8:162864120-162864142  | 162864137 | 3 | DNA | GGC-CGAGGTcGACTACCGGNNRG  | GtCTGAGGcGcGcTcTCCGCTGG   | + | 4 | 1 | 7 | 0.00 | 3.50 |
| Chr5:136819775-136819797  | 136819782 | 5 | RNA | GGCCGAGGTGCACTACCGGNNRG   | GGCCG--GcaAcACTCaGaaAG    | + | 5 | 2 | 7 | 0.00 | 3.50 |
| Chr5:17629262-17629284    | 17629269  | 5 | RNA | GGCCGAGGTGCACTACCGGNNRG   | GaCCGAGGT-GcGaaCaAaGAG    | - | 5 | 1 | 7 | 0.00 | 3.50 |
| Chr1:208079284-208079306  | 208079291 | 5 | RNA | GGCCGAGGTGCACTACCGGNNRG   | GtCAAGGtCt--TACCgGaaAG    | - | 5 | 2 | 7 | 0.00 | 3.50 |
| Chr10:87020568-87020590   | 87020585  | 3 | RNA | GGCCGAGGTGCACTACCGGNNRG   | G-aCGGgTcGcCaCaGaaGcCGGG  | + | 5 | 1 | 7 | 0.00 | 3.50 |
| Chr2:132714464-132714486  | 132714481 | 3 | RNA | GGCCGAGGTGCACTACCGGNNRG   | a--CgGgTcGcAaCaaGcCGGG    | + | 5 | 2 | 7 | 0.00 | 3.50 |
| Chr2:19622822-19622844    | 19622839  | 3 | DNA | GGCCGAGGTGCACTACCGGNNRG   | GtCAAGGTcGACTACCGGNNRG    | + | 5 | 2 | 7 | 0.00 | 3.50 |
| Chr8:11570311-11570313    | 11570318  | 3 | RNA | GGCCGAGGTGCACTACCGGNNRG   | GtGcGAGGcGcGcGACTAcCGCGG  | + | 5 | 2 | 7 | 0.00 | 3.50 |
| Chr1:182096085-182096107  | 182096092 | 5 | RNA | GGCCGAGGTGCACTACCGGNNRG   | G-CGAGGTcGcGcTcCGCGAG     | + | 5 | 2 | 7 | 0.00 | 3.50 |
| Chr1:58868607-58868629    | 58868624  | 3 | RNA | GGCCGAGGTGCACTACCGGNNRG   | G-CtAGGcGcGACTCaGaaCAG    | + | 5 | 1 | 7 | 0.00 | 3.50 |
| Chr10:73019873-73019895   | 73019880  | 5 | RNA | GGCCGAGGTGCACTACCGGNNRG   | G-CtAGGtTcGcTAgcTcCGCGG   | + | 5 | 1 | 7 | 0.00 | 3.50 |
| Chr2:188582221-188582243  | 188582238 | 3 | RNA | GGCCGAGGTGCACTACCGGNNRG   | GGC--tcGcAaACTACCGCTGG    | + | 5 | 2 | 7 | 0.00 | 3.50 |
| Chr10:39089907-39089929   | 39089914  | 5 | RNA | GGCCGAGGTGCACTACCGGNNRG   | GG--GAGGgGtATcGgGcAAG     | - | 5 | 2 | 7 | 0.00 | 3.50 |
| Chr1:101069060-101069082  | 101069067 | 5 | DNA | GGCCGAGGTGCACTACCGGNNRG   | GGcGAGGcGAGTgGcTcCGCTCAG  | + | 5 | 2 | 7 | 0.00 | 3.50 |
| Chr8:155249330-155249352  | 155249337 | 5 | RNA | GGCCGAGGTGCACTACCGGNNRG   | TcCGcAGT-GACTgTcGaaGAG    | - | 5 | 1 | 7 | 0.00 | 3.50 |
| Chr4:60783612-60783634    | 60783619  | 5 | DNA | GGC--CGAGGTcGACTACCGGNNRG | GGCTcGgGgGcTcAaCctCGCGCGG | + | 5 | 2 | 7 | 0.00 | 3.50 |
| Chr2:183742862-183742884  | 183742869 | 5 | RNA | GGCCGAGGTGCACTACCGGNNRG   | GGC--tGcAaACTACCGCTGG     | - | 5 | 2 | 7 | 0.00 | 3.50 |
| Chr1:194026935-194026957  | 194026942 | 5 | RNA | GGCCGAGGTGCACTACCGGNNRG   | GtCAcGgGcACTAcGgGtAG      | + | 5 | 1 | 7 | 0.00 | 3.50 |
| Chr10:20678206-20678228   | 20678223  | 3 | RNA | GGCCGAGGTGCACTACCGGNNRG   | GcCG-GaaGcAaACTcCGCGAG    | + | 5 | 1 | 7 | 0.00 | 3.50 |
| Chr4:176549488-176549510  | 176549495 | 3 | RNA | GGCCGAGGTGCACTACCGGNNRG   | caCC-AGGTcGcTcAaCtGgAGG   | + | 5 | 2 | 7 | 0.00 | 3.50 |
| Chr8:70163945-70163967    | 70163952  | 5 | RNA | GGCCGAGGTGCACTACCGGNNRG   | GcGcGgGaa--ACTACCGGaaAGG  | - | 5 | 2 | 7 | 0.00 | 3.50 |
| Chr5:218107646-218107668  | 218107653 | 5 | DNA | GGCCGAGGTGCACTACCGGNNRG   | aGcCAAGTcCACTAcCGGcTgAG   | + | 5 | 1 | 7 | 0.00 | 3.50 |
| Chr5:128710966-128710988  | 128710983 | 3 | RNA | GGCCGAGGTGCACTACCGGNNRG   | GaaCa-GGTcGcGACaAaGcCGGG  | + | 5 | 1 | 7 | 0.00 | 3.50 |
| Chr3:78246029-78246051    | 78246036  | 3 | RNA | GGCCGAGGTGCACTACCGGNNRG   | GGCCGAGGtGgAg--CtGgGaaAG  | - | 5 | 2 | 7 | 0.00 | 3.50 |
| Chr1:69482345-69482367    | 69482362  | 3 | RNA | GGCCGAGGTGCACTACCGGNNRG   | GGC-GAaCaCtGACTACCGCGGG   | + | 5 | 1 | 7 | 0.00 | 3.50 |
| Chr7:104890395-104890417  | 104890402 | 5 | RNA | GGCCGAGGTGCACTACCGGNNRG   | GGCCGgGcTgGcTg--GGCTGG    | - | 5 | 2 | 7 | 0.00 | 3.50 |
| Chr2:290345962-290345984  | 290345979 | 3 | RNA | GGCCGAGGTGCACTACCGGNNRG   | GcCAAGGcGcGcGACTAcCGCGG   | + | 5 | 1 | 7 | 0.00 | 3.50 |
| Chr3:59473846-59473868    | 59473850  | 5 | RNA | GGCCGAGGTGCACTACCGGNNRG   | GgGcG-GGcCaCctCGCGCGG     | + | 5 | 2 | 7 | 0.00 | 3.50 |
| Chr5:117397363-117397385  | 117397380 | 3 | RNA | GGCCGAGGTGCACTACCGGNNRG   | GgGcG-GGcCaCctCGCGCGG     | + | 5 | 1 | 7 | 0.00 | 3.50 |
| Chr8:59232310-59232332    | 59232317  | 3 | RNA | GGCCGAGGTGCACTACCGGNNRG   | GtCAAGT--ACTcGCGCGAG      | + | 5 | 2 | 7 | 0.00 | 3.50 |
| Chr6:119742892-119742914  | 119742909 | 3 | RNA | GGCCGAGGTGCACTACCGGNNRG   | GtCtGgGT-GaCaCtCGCGCGG    | + | 5 | 1 | 7 | 0.00 | 3.50 |
| Chr1:252608099-252608121  | 252608106 | 5 | RNA | GGCCGAGGTGCACTACCGGNNRG   | caCAAGTcGcT-CCGCGAG       | + | 5 | 1 | 7 | 0.00 | 3.50 |
| Chr6:142107425-142107447  | 142107442 | 3 | RNA | GGCCGAGGTGCACTACCGGNNRG   | GGC-AaactGACACCGCGGG      | + | 5 | 2 | 7 | 0.00 | 3.50 |
| Chr2:83285025-83285047    | 83285042  | 3 | RNA | GGCCGAGGTGCACTACCGGNNRG   | GGCCAG--CGAaACcGgG        |   |   |   |   |      |      |

|                           |   |     |                           |                           |   |   |   |      |      |      |
|---------------------------|---|-----|---------------------------|---------------------------|---|---|---|------|------|------|
| Chr10:101058734-101058756 | 5 | RNA | GGCCGAGGTGCACTACCGGCRNG   | GTCCGAGTAgCT-CGaaCGG      | - | 5 | 2 | 7    | 0.00 | 3.50 |
| Chr3:76087062-76087084    | 3 | RNA | GGCCGAGGTGCACTACCGGCRNG   | GgGcGcGCTGcGcG-CGagGAG    | + | 5 | 2 | 7    | 0.00 | 3.50 |
| Chr2:109836979-10983701   | 3 | RNA | GGCCGAGGTGCACTACCGGCRNG   | GGCCAGGTGcGcCT-CGCGGAG    | + | 5 | 1 | 7    | 0.00 | 3.50 |
| Chr9:17097128-17097130    | 3 | RNA | GGCCGAGGTGCACTACCGGCRNG   | GGC-tcGcGACTACCGCTGG      | - | 4 | 2 | 2    | 4.96 | 3.48 |
| Chr2:118375013-118375035  | 3 | RNA | GGCCGAGGTGCACTACCGGCRNG   | G-aGcGgGgGAGcAGCCGCTGG    | - | 5 | 2 | 3    | 3.86 | 3.43 |
| Chr7:12722144-12722146    | 2 | RNA | GGCCGAGGTGCACTACCGGCRNG   | GcCCGAGGTGCACTACCGGCRNG   | - | 5 | 2 | 3    | 2.75 | 3.38 |
| Chr2:22063800-22063822    | 3 | RNA | GGCCGAGGTGCACTACCGGCRNG   | YG-GAGGTGCACTGcGgGAGCG    | + | 5 | 2 | 4    | 2.75 | 3.38 |
| Chr5:50331645-50331667    | 2 | RNA | GGCCGAGGTGCACTACCGGCRNG   | GcCAHGTGTGAGTTC-GCCAG     | + | 5 | 2 | 5    | 1.65 | 3.33 |
| Chr7:132883954-132883976  | 3 | RNA | GGCCGAGGTGCACTACCGGCRNG   | G-aCGcGGTGCACaCgagCGGG    | - | 5 | 1 | 5    | 1.65 | 3.33 |
| Chr5:132656602-132656624  | 5 | RNA | GGCCGAGGTGCACTACCGGCRNG   | GcTgGcTGTGACTA-GGTGG      | + | 5 | 2 | 0    | 6.61 | 3.31 |
| Chr2:191357245-191357267  | 3 | RNA | GGCCGAGGTGCACTACCGGCRNG   | GGC-AGGCAGGcAGcCGCGGG     | - | 5 | 2 | 0    | 6.61 | 3.31 |
| Chr7:112767413-112767435  | 5 | RNA | GGCCGAGGTGCACTACCGGCRNG   | GHCCGtGT-ACCAcCGGAGC      | - | 5 | 2 | 0    | 6.61 | 3.31 |
| Chr4:209877700-209877722  | 3 | RNA | GGCCGAGGTGCACTACCGGCRNG   | GGCCAGGAGgAagggC-CGGGG    | - | 5 | 2 | 0    | 6.61 | 3.31 |
| Chr1:148914618-148914640  | 5 | RNA | GGCCGAGGTGCACTACCGGCRNG   | ag-GAcCGAGCTAGCaGcAGG     | + | 5 | 2 | 0    | 6.61 | 3.31 |
| Chr5:141994705-141994727  | 4 | RNA | GGCCGAGGTGCACTACCGGCRNG   | cGcCGAGTTCGA-AGcTCTCTGG   | + | 5 | 2 | 0    | 6.61 | 3.31 |
| Chr1:628122157-628122179  | 2 | RNA | GGCCGAGGTGCACTACCGGCRNG   | GcCGAGGTGCACTACCGGCRNG    | + | 5 | 2 | 0    | 6.61 | 3.31 |
| Chr7:150943166-150943188  | 3 | RNA | GGCCGAGGTGCACTACCGGCRNG   | G-aCGGAGGTGCACTACCGGCRNG  | - | 5 | 1 | 0    | 6.61 | 3.31 |
| Chr4:436501-436523        | 5 | RNA | GGCCGAGGTGCACTACCGGCRNG   | cg-GHGTGTGAGcAGcTCTGG     | - | 5 | 2 | 0    | 6.61 | 3.31 |
| Chr9:62104788-62104810    | 2 | DNA | GGCCGAGGTGCACTACCGGCRNG   | GGCAGATATTCggtTACCGTTCAGG | - | 5 | 2 | 0    | 6.61 | 3.31 |
| Chr8:126611744-126611766  | 2 | RNA | GGCCGAGGTGCACTACCGGCRNG   | GGcCTcGGT-CACcCGCAGG      | + | 4 | 2 | 0    | 6.61 | 3.31 |
| Chr7:154322906-154322928  | 5 | RNA | GGCCGAGGTGCACTACCGGCRNG   | GGCCAGGAGgGcCT-CGcGCTGG   | + | 4 | 1 | 0    | 6.61 | 3.31 |
| Chr8:104798108-104798130  | 3 | RNA | GGCCGAGGTGCACTACCGGCRNG   | caCAAGTTCGCT-CCGCGCAG     | + | 5 | 1 | 0    | 6.61 | 3.31 |
| Chr3:210542609-210542631  | 3 | DNA | GGCCGAGGTGCACTACCGGCRNG   | ctCCAGGcGcCAACTCCGGCAGG   | - | 5 | 2 | 0    | 6.61 | 3.31 |
| Chr2:13460991-13461013    | 3 | RNA | GGCCGAGGTGCACTACCGGCRNG   | GcGcG-GGcCAcCctCGCGCGG    | - | 5 | 1 | 0    | 6.61 | 3.31 |
| Chr2:11865339-11865361    | 2 | RNA | GGCCGAGGTGCACTACCGGCRNG   | GGTCCAGGAGa-ACaGcCAAG     | - | 5 | 2 | 0    | 6.61 | 3.31 |
| Chr1:706593-706615        | 2 | DNA | GGCCGAGGTGCACTACCGGCRNG   | GcCGAGGTGCACTACCGGCRNG    | + | 5 | 2 | 0    | 6.61 | 3.31 |
| Chr2:170420095-170420117  | 3 | DNA | GGCCGAGGTGCACTACCGGCRNG   | ctCCAGGcGcCAACTCCGGCAGG   | - | 5 | 2 | 0    | 6.61 | 3.31 |
| Chr8:154675293-154675315  | 3 | DNA | G-CGCCGAGGTGCACTACCGGCRNG | GGCCCTGcGgCGAGTACCGCAGG   | - | 5 | 1 | 0    | 6.61 | 3.31 |
| Chr4:140230920-140230942  | 2 | RNA | GGCCGAGGTGCACTACCGGCRNG   | G-aCGGCTGCACaCgagCGGG     | + | 5 | 2 | 0    | 6.61 | 3.31 |
| Chr4:93762624-93762646    | 5 | RNA | GGCCGAGGTGCACTACCGGCRNG   | cGgCGAGGTGCACTACCGGCRNG   | - | 5 | 2 | 0    | 6.61 | 3.31 |
| Chr7:110131344-110131366  | 4 | RNA | GGCCGAGGTGCACTACCGGCRNG   | cg-GAGGGAGTACCTGCTGG      | - | 5 | 2 | 0    | 6.61 | 3.31 |
| Chr7:117228090-117228112  | 2 | RNA | GGCCGAGGTGCACTACCGGCRNG   | cGAGAGTGTGAGcCAc-IGAG     | - | 5 | 2 | 0    | 6.61 | 3.31 |
| Chr5:72879057-72879079    | 5 | RNA | GGCCGAGGTGCACTACCGGCRNG   | GGCCGAAATCCctCC-CTGG      | + | 5 | 2 | 0    | 6.61 | 3.31 |
| Chr7:113449336-113449358  | 5 | RNA | GGCCGAGGTGCACTACCGGCRNG   | GGC-tcGTgACTACCGCTGG      | + | 3 | 2 | 0    | 6.61 | 3.31 |
| Chr2:132941984-132942006  | 3 | RNA | GGCCGAGGTGCACTACCGGCRNG   | TCGCCAGGT-GACAAgGcCAAG    | - | 5 | 1 | 0    | 6.61 | 3.31 |
| Chr1:286460736-28646095   | 4 | RNA | GGCCGAGGTGCACTACCGGCRNG   | GcCGAGGTGCACTACCGGCRNG    | + | 5 | 2 | 0    | 6.61 | 3.31 |
| Chr1:36204131-36204153    | 2 | RNA | GGCCGAGGTGCACTACCGGCRNG   | GcCGAGGTGCACTACCGGCRNG    | - | 5 | 1 | 0    | 6.61 | 3.31 |
| Chr3:134841581-134841603  | 5 | RNA | GGCCGAGGTGCACTACCGGCRNG   | GGC-GGcCAcCctCGCGCGG      | + | 5 | 1 | 0    | 6.61 | 3.31 |
| Chr7:107967449-107967471  | 5 | RNA | GGCCGAGGTGCACTACCGGCRNG   | GGCCAGGcGcCA-AGgGgGAG     | + | 5 | 2 | 0    | 6.61 | 3.31 |
| Chr1:246890071-246890093  | 3 | RNA | GGCCGAGGTGCACTACCGGCRNG   | G-aCGGCTGCACaCgagCGGG     | - | 5 | 1 | 0    | 6.61 | 3.31 |
| Chr1:134587246-134587268  | 3 | RNA | GGCCGAGGTGCACTACCGGCRNG   | acCCAGcTcGAGTTC-CCGGC     | - | 5 | 2 | 0    | 6.61 | 3.31 |
| Chr8:76911959-76911981    | 7 | DNA | GGCCGAGGTGCACTACCGGCRNG   | tGcGAGGcGcGcCAcCGCGcCAAG  | - | 5 | 2 | 0    | 6.61 | 3.31 |
| Chr5:223334173-223334195  | 5 | RNA | GGCCGAGGTGCACTACCGGCRNG   | Gga-AGAGGAGcAGcAGcCGCGGG  | + | 5 | 2 | 0    | 6.61 | 3.31 |
| Chr5:31582421-31582443    | 3 | DNA | GGC-CGAGGTGCACTACCGGCRNG  | GGCCTCGGgGcCAcCctCGCGCGG  | - | 5 | 1 | 0    | 6.61 | 3.31 |
| Chr1:62811450-62811452    | 6 | RNA | GGCCGAGGTGCACTACCGGCRNG   | G-aCGGCTGCACaCgagCGGG     | - | 5 | 2 | 0    | 6.61 | 3.31 |
| Chr8:2695303-2695305      | 4 | RNA | GGCCGAGGTGCACTACCGGCRNG   | G-aCGGCTGCACaCgagCGGG     | - | 5 | 2 | 0    | 6.61 | 3.31 |
| Chr2:158280105-158280127  | 2 | RNA | GGCCGAGGTGCACTACCGGCRNG   | GGCCcA-CcAGTTCGgCGGG      | - | 5 | 2 | 0    | 6.61 | 3.31 |
| Chr2:167850650-167850672  | 5 | RNA | GGCCGAGGTGCACTACCGGCRNG   | GHCCAGTCTCG-TACHGACAG     | - | 5 | 2 | 0    | 6.61 | 3.31 |
| Chr4:222910238-222910260  | 2 | RNA | GGCCGAGGTGCACTACCGGCRNG   | GTCCG-GaaGAGTACCGGAG      | + | 5 | 2 | 0    | 6.61 | 3.31 |
| Chr10:42821618-42821640   | 4 | RNA | GGCCGAGGTGCACTACCGGCRNG   | G-CGIGGAGTACTCGcTGG       | - | 5 | 2 | 0    | 6.61 | 3.31 |
| Chr2:26710193-26710215    | 2 | RNA | GGCCGAGGTGCACTACCGGCRNG   | GgCGGCTGCAGcAG-CgagAG     | - | 5 | 1 | 0    | 6.61 | 3.31 |
| Chr4:39844606-39844628    | 5 | RNA | GGCCGAGGTGCACTACCGGCRNG   | GGC-tcGagGACTACCGCTGG     | + | 4 | 2 | 0    | 6.61 | 3.31 |
| Chr1:242800982-242801004  | 3 | RNA | GGCCGAGGTGCACTACCGGCRNG   | G-tGAGGcTAgcACCGCCAG      | + | 5 | 2 | 0    | 6.61 | 3.31 |
| Chr1:119652003-119652025  | 4 | DNA | GGC-CGAGGTGCACTACCGGCRNG  | GcCTCGAGGAGcGCTcCAcGCTGG  | - | 5 | 1 | 0    | 6.61 | 3.31 |
| Chr1:19521284-19521306    | 3 | RNA | GGCCGAGGTGCACTACCGGCRNG   | GcCTcA-aGACTACCGCTGG      | - | 4 | 2 | 0    | 6.61 | 3.31 |
| Chr10:3651947-3651969     | 3 | RNA | GGCCGAGGTGCACTACCGGCRNG   | G-cGgAGGTGCACTACCGGCRNG   | - | 5 | 2 | 0    | 6.61 | 3.31 |
| Chr3:26127355-26127377    | 2 | RNA | GGCCGAGGTGCACTACCGGCRNG   | aaCGGcGTGCTGACTA-GGgAG    | + | 5 | 2 | 0    | 6.61 | 3.31 |
| Chr1:29483704-29483726    | 2 | DNA | GGC-CGAGGTGCACTACCGGCRNG  | GcCTGAGGTGCaCctCGCGGAG    | - | 4 | 1 | 0    | 6.61 | 3.31 |
| Chr9:58043514-58043536    | 5 | RNA | GGCCGAGGTGCACTACCGGCRNG   | GGCCAGTcT-CcCctCGCCAG     | - | 4 | 1 | 0    | 6.61 | 3.31 |
| Chr3:23257372-23257394    | 2 | RNA | GGCCGAGGTGCACTACCGGCRNG   | TGcGAGGTGCAGc-CcCGAG      | + | 5 | 2 | 0    | 6.61 | 3.31 |
| Chr2:4237640-4237662      | 2 | DNA | GGCCGAGGTGCACTACCGGCRNG   | GcCTCAGAGcGcCAcCaacCGCCGG | - | 5 | 1 | 0    | 6.61 | 3.31 |
| Chr3:226146250-226146272  | 2 | RNA | GGCCGAGGTGCACTACCGGCRNG   | GcCCAGGcGcCA-ActcGcTGG    | - | 5 | 2 | 0    | 6.61 | 3.31 |
| Chr2:228863194-228863216  | 2 | RNA | GGCCGAGGTGCACTACCGGCRNG   | GcCGAGGTGCACTACCGGCRNG    | + | 5 | 2 | 0    | 6.61 | 3.31 |
| Chr8:160556769-160556791  | 3 | RNA | GGCCGAGGTGCACTACCGGCRNG   | G-aCGGCTGCACaCgagCGGG     | - | 5 | 1 | 0    | 6.61 | 3.31 |
| Chr9:7818710-78187132     | 4 | RNA | GGCCGAGGTGCACTACCGGCRNG   | cCCCGGTGCTGcGcG-CGcAGG    | - | 4 | 2 | 0    | 6.61 | 3.31 |
| Chr5:17994095-17994117    | 2 | RNA | GGCCGAGGTGCACTACCGGCRNG   | GcCGAGGTGCACTACCGGCRNG    | + | 5 | 2 | 0    | 6.61 | 3.31 |
| Chr1:262657980-262658002  | 2 | RNA | GGCCGAGGTGCACTACCGGCRNG   | GGCCAGGcGcCA-gCCcGcGG     | - | 5 | 1 | 0    | 6.61 | 3.31 |
| Chr6:48834209-48834231    | 2 | DNA | GGCCGAGGTGCACTACCGGCRNG   | GGCCAGGTGcTgGcTgGCGCTAG   | + | 5 | 1 | 0    | 6.61 | 3.31 |
| Chr1:173662124-173662146  | 3 | RNA | GGCCGAGGTGCACTACCGGCRNG   | GGC-AGGcCAcCctCGCTGG      | + | 4 | 2 | 0    | 6.61 | 3.31 |
| Chr2:129399458-129399480  | 4 | DNA | GGCCGAGGTGCACTACCGGCRNG   | GcGcCAcTCGACTCTACCGCGAG   | - | 5 | 2 | 0    | 6.61 | 3.31 |
| Chr9:76346098-76346120    | 5 | RNA | GGCCGAGGTGCACTACCGGCRNG   | GaCgAGGAGTGCAGT-GTCAGG    | + | 5 | 2 | 0    | 6.61 | 3.31 |
| Chr7:56579233-56579255    | 5 | RNA | GGCCGAGGTGCACTACCGGCRNG   | GGCCAGTCTCG-tAtCaCAAG     | - | 5 | 2 | 0    | 6.61 | 3.31 |
| Chr8:59924109-59924131    | 5 | DNA | GGCCGAGGTGCACTACCGGCRNG   | GcTCGAGGcGgGAGcAGcCGGCTGG | + | 5 | 2 | 0    | 6.61 | 3.31 |
| Chr8:126646991-126647013  | 5 | RNA | GGCCGAGGTGCACTACCGGCRNG   | GGCCGAGGTGcGg-aggGcGgCGG  | - | 5 | 2 | 0    | 6.61 | 3.31 |
| Chr3:152155382-152155404  | 4 | DNA | GGC-CGAGGTGCACTACCGGCRNG  | GGCTCAGGAGcGCTTCGCGCAGG   | - | 5 | 2 | 0    | 6.61 | 3.31 |
| Chr1:3203881-3203903      | 3 | RNA | GGCCGAGGTGCACTACCGGCRNG   | G-aCGGCTGCACaCgagCGGG     | - | 5 | 2 | 0    | 6.61 | 3.31 |
| Chr5:9260675-9260697      | 5 | RNA | GGCCGAGGTGCACTACCGGCRNG   | GGCCAGGTGCACTACCGGCRNG    | + | 4 | 2 | 0    | 6.61 | 3.31 |
| Chr6:84303473-84303495    | 2 | RNA | GGCCGAGGTGCACTACCGGCRNG   | GcCCAGGcTcGAGT-CGcIAGG    | - | 5 | 2 | 0    | 6.61 | 3.31 |
| Chr2:22314149-22314171    | 3 | RNA | GGCCGAGGTGCACTACCGGCRNG   | eTcGAGGTGCAGcAGcGCGGAG    | - | 5 | 1 | 0    | 6.61 | 3.31 |
| Chr1:20374787-20374809    | 5 | RNA | GGCCGAGGTGCACTACCGGCRNG   | GGC-AGGcAGcAGcTcCGCGG     | - | 5 | 2 | 0    | 6.61 | 3.31 |
| Chr2:190325651-190325673  | 4 | RNA | GGCCGAGGTGCACTACCGGCRNG   | tGtaAGIT-GaATACCGCTGG     | - | 5 | 1 | 0    | 6.61 | 3.31 |
| Chr4:62678695-62678717    | 4 | DNA | GGC-CGAGGTGCACTACCGGCRNG  | GcCTGcGgAGcGCTcCGGCTGG    | - | 5 | 1 | 0    | 6.61 | 3.31 |
| Chr1:116873093-116873115  | 2 | RNA | GGCCGAGGTGCACTACCGGCRNG   | GG-tAhtGcAGcAGcCGTgAG     | + | 5 | 2 | 0    | 6.61 | 3.31 |
| Chr3:26264873-26264895    | 3 | RNA | GGCCGAGGTGCACTACCGGCRNG   | G-aCGGCTGCACaCgagCGGG     | - | 5 | 1 | 0    | 6.61 | 3.31 |
| Chr2:149630338-149630360  | 2 | RNA | GGCCGAGGTGCACTACCGGCRNG   | GGC-AGGcCAcCctCGCGCGG     | - | 4 | 2 | 0    | 6.61 | 3.31 |
| Chr1:11732166-11732188    | 4 | RNA | GGCCGAGGTGCACTACCGGCRNG   | GGC-AGGcCAcCctCGCGCGG     | - | 5 | 2 | 0    | 6.61 | 3.31 |
| Chr2:17698302-17698324    | 3 | RNA | GGCCGAGGTGCACTACCGGCRNG   | GgGcCGcGcGcCA-ACcCAcAGG   | + | 5 | 2 | 0    | 6.61 | 3.31 |
| Chr3:16982243-16982265    | 5 | RNA | GGCCGAGGTGCACTACCGGCRNG   | GGC-tGcAGACTACCGCTGG      | - | 5 | 2 | 0    | 6.61 | 3.31 |
| Chr2:162923118-162923140  | 5 | RNA | GGCCGAGGTGCACTACCGGCRNG   | GGCCAGGcGcCA-gAGTGGCAG    | + | 5 | 1 | 0    | 6.61 | 3.31 |
| Chr1:101470370-101470392  | 3 | DNA | GGCCGAGGTGCACTACCGGCRNG   | GcTcGAGGTGCAGcAGcGCGAGG   | - | 5 | 1 | 0    | 6.61 | 3.31 |
| Chr9:15776841-15776863    | 2 | DNA | GGCCGAGGTGCACTACCGGCRNG   | GcGcGAGGTGCTGcGAGAGGcCAG  | + | 4 | 2 | 0    | 6.61 | 3.31 |
| Chr4:200141171-200141193  | 3 | DNA | GGCCGAGGTGCACTACCGGCRNG   | ctGaaAGGTGCAGcAATCCGGCAGG | - | 5 | 2 | 0    | 6.61 | 3.31 |
| Chr1:168558804-168558826  | 3 | RNA | GGCCGAGGTGCACTACCGGCRNG   | G-aCGAGGTGCACaCgagCGGG    | - | 4 | 1 | 0    | 6.61 | 3.31 |
| Chr2:20643290-20643312    | 4 | RNA | GGCCGAGGTGCACTACCGGCRNG   | G-CtCGGcGcCAcTACCGCGG     | - | 5 | 1 | 0    | 6.61 | 3.31 |
| Chr1:68850688-68850710    | 5 | RNA | GGCCGAGGTGCACTACCGGCRNG   | GGC-AGGcCAcCctCGCGCGG     | - | 4 | 2 | 0    | 6.61 | 3.31 |
| Chr5:28838900-28838922    | 5 | RNA | GGCCGAGGTGCACTACCGGCRNG   | GcCGGcGcGAGT-TcCGCGGG     | + | 4 | 2 | 0    | 6.61 | 3.31 |
| Chr3:73329873-73329895    | 4 | DNA | GGCCGAGGTGCACTACCGGCRNG   | GgGcGcGcGcTgGcCAcTCCCGGAG | - | 2 | 6 | 0.55 | 3.28 | 3.28 |
| Chr1:129429467-129429489  | 4 | DNA | GGCCGAGGTGCACTACCGGCRNG   | GcTCAGAGcCAcCACCATGGCCAG  | + | 5 | 2 | 0    | 6.61 | 3.31 |
| Chr4:83512534-83512556    | 2 | DNA | GGCCGAGGTGCACTACCGGCRNG   | GaCtAGTTCAGTTCgGcCGGG     | + | 5 | 1 | 0    | 6.61 | 3.31 |
| Chr1:183244851-183244873  | 3 | RNA | GGCCGAGGTGCACTACCGGCRNG   | G-aCGGCTGCACaCgagCGGG     | - | 5 | 1 | 0    | 6.61 | 3.31 |
| Chr6:113403735-113403757  | 3 | RNA | GGCCGAGGTGCACTACCGGCRNG   | GGC-tHcGAGTACCGCTGG       | - | 4 | 2 | 0    | 6.61 | 3.31 |
| Chr5:65009067-65009089    | 4 | RNA | GGCCGAGGTGCACTACCGGCRNG   | G-aCGGcTGCACaCgagCGGG     | + | 5 | 1 | 2    | 4.41 | 3.21 |
| Chr7:43329720-43329742    | 3 | RNA | GGCCGAGGTGCACTACCGGCRNG   | T-CtctGTGAGcACTCCGG       |   |   |   |      |      |      |

|                          |   |     |                     |                         |   |   |   |   |      |      |
|--------------------------|---|-----|---------------------|-------------------------|---|---|---|---|------|------|
| Chr5:4772759-47727581    | 5 | DNA | GGCCGAGGTCGACT-ACC  | GGCCAGGTAATGAAACGGCCAG  | - | 5 | 2 | 0 | 6.06 | 3.03 |
| Chr9:94051057-94051079   | 4 | RNA | GGCCGAGGTCGACTACCGG | GGCCGAGGTCG-eggGagCGG   | + | 5 | 2 | 0 | 6.06 | 3.03 |
| Chr1:290316383-290316405 | 2 | RNA | GGCCGAGGTCGACTACCGG | GGCCGAGGTCG-eggGagCGG   | + | 5 | 2 | 0 | 6.06 | 3.03 |
| Chr4:180668802-180668824 | 2 | RNA | GGCCGAGGTCGACTACCGG | G-aCGGTCGACAGCaCGCGGG   | + | 5 | 1 | 0 | 6.06 | 3.03 |
| Chr1:39102091-39102113   | 4 | RNA | GGCCGAGGTCGACTACCGG | c-CAGGTCGACCaCacCAAG    | + | 5 | 2 | 0 | 6.06 | 3.03 |
| Chr2:14921552-14921574   | 2 | RNA | GGCCGAGGTCGACTACCGG | GcCTCGAGGTCGCTCCGCGCG   | + | 5 | 2 | 0 | 6.06 | 3.03 |
| Chr10:4946382-49463504   | 4 | RNA | GGCCGAGGTCGACTACCGG | cACCAAGG-GACTTCCGCGAG   | + | 5 | 2 | 0 | 6.06 | 3.03 |
| Chr5:119153448-119153470 | 2 | RNA | GGCCGAGGTCGACTACCGG | GGCCGAGGTCgTgTCC-HGAG   | + | 5 | 2 | 0 | 6.06 | 3.03 |
| Chr7:57999897-57999002   | 5 | RNA | GGCCGAGGTCGACTACCGG | GGC-tcGgGACTACCGCTGG    | + | 5 | 2 | 0 | 6.06 | 3.03 |
| Chr1:257619477-257619499 | 3 | RNA | GGCCGAGGTCGACTACCGG | GGCCAGCaGagT-gACCGCTGG  | + | 5 | 2 | 0 | 6.06 | 3.03 |
| Chr9:59711973-59711995   | 5 | RNA | GGCCGAGGTCGACTACCGG | GGC-tctTGACTACCGCGCG    | + | 5 | 2 | 0 | 6.06 | 3.03 |
| Chr5:735500-735522       | 4 | RNA | GGCCGAGGTCGACTACCGG | GGC-GAGGTCGAGgACTCgG    | + | 5 | 1 | 0 | 6.06 | 3.03 |
| Chr3:7908094-79081016    | 4 | RNA | GGCCGAGGTCGACTACCGG | GGCGGTCGAC-CGgAaGAG     | + | 5 | 2 | 0 | 6.06 | 3.03 |
| Chr5:182735082-182735104 | 2 | RNA | GGCCGAGGTCGACTACCGG | GG-GAGGgagGgACTCGGAG    | + | 5 | 2 | 0 | 6.06 | 3.03 |
| Chr9:132573667-132573689 | 3 | RNA | GGCCGAGGTCGACTACCGG | G-aCGGTCGACaCaGgCGG     | + | 5 | 1 | 0 | 6.06 | 3.03 |
| Chr5:61844852-61844874   | 2 | RNA | GGCCGAGGTCGACTACCGG | GGCCGAGGTCGCTCC-aggG    | + | 5 | 2 | 0 | 6.06 | 3.03 |
| Chr3:199670664-199670686 | 5 | RNA | GGCCGAGGTCGACTACCGG | cCG-tcTGTGACTACCGCTGG   | + | 4 | 2 | 0 | 6.06 | 3.03 |
| Chr10:73463374-73463396  | 3 | RNA | GGCCGAGGTCGACTACCGG | GGI-GHGTGAGgACGCGGAG    | + | 5 | 1 | 0 | 6.06 | 3.03 |
| Chr3:45464703-45464725   | 5 | DNA | GGCCGAGGTCGACTACCGG | GGTCGAGGTCGAGTcGgCGCTGG | + | 5 | 2 | 0 | 6.06 | 3.03 |
| Chr1:109199431-109199453 | 3 | RNA | GGCCGAGGTCGACTACCGG | G-CAGAGTCGACTCgCaTGG    | + | 5 | 2 | 0 | 6.06 | 3.03 |
| Chr2:106623030-106623052 | 2 | RNA | GGCCGAGGTCGACTACCGG | GGCCGAGG-CGgTggGCGGG    | + | 5 | 2 | 0 | 6.06 | 3.03 |
| Chr5:55733352-55733374   | 3 | RNA | GGCCGAGGTCGACTACCGG | GgTgTgGgCGa-ACC         | + | 4 | 2 | 0 | 6.06 | 3.03 |
| Chr7:52762499-52762521   | 2 | DNA | GGCCGAGGTCGACTACCGG | GGCCAGGgGgGACTACGCGGG   | + | 4 | 1 | 0 | 6.06 | 3.03 |
| Chr2:40021028-40021050   | 4 | RNA | GGCCGAGGTCGACTACCGG | T-CGAGGTCaCacCGCGGG     | + | 5 | 2 | 0 | 6.06 | 3.03 |
| Chr8:33512836-33512858   | 3 | DNA | GGCCGAGGTCGACTACCGG | GtGAGAGTgTgTGGAGGCGGG   | + | 5 | 2 | 0 | 6.06 | 3.03 |
| Chr5:180616727-180616749 | 2 | RNA | GGCCGAGGTCGACTACCGG | cAcGAGGTCGACTCAGCGAG    | + | 5 | 1 | 0 | 6.06 | 3.03 |
| Chr8:45366222-45366244   | 5 | RNA | GGCCGAGGTCGACTACCGG | GgGc-AGGcCaCctCCGCGCG   | + | 5 | 1 | 0 | 6.06 | 3.03 |
| Chr9:97776243-97776265   | 5 | RNA | GGCCGAGGTCGACTACCGG | GGCCGAGTTCaACT-CGgAGG   | + | 5 | 1 | 0 | 6.06 | 3.03 |
| Chr2:204428188-204428210 | 2 | RNA | GGCCGAGGTCGACTACCGG | GGC-AGGcCagCTCGCGCG     | + | 5 | 2 | 0 | 6.06 | 3.03 |
| Chr9:4324450-4324472     | 3 | DNA | GGCCGAGGTCGACTACCGG | GGATCaGAGTcACTCaGCGAAG  | + | 5 | 2 | 0 | 6.06 | 3.03 |
| Chr6:61842309-61842331   | 3 | RNA | GGCCGAGGTCGACTACCGG | GGCGGTCGAC-ACgAGCTGG    | + | 5 | 1 | 0 | 6.06 | 3.03 |
| Chr8:51395291-51395313   | 2 | RNA | GGCCGAGGTCGACTACCGG | GGC-AGcTgGCTcCGCTGG     | + | 4 | 2 | 0 | 6.06 | 3.03 |
| Chr2:192273889-192273911 | 2 | RNA | GGCCGAGGTCGACTACCGG | GG-GAGTcACTgCGCGGG      | + | 5 | 2 | 0 | 6.06 | 3.03 |
| Chr2:31312277-31312299   | 3 | RNA | GGCCGAGGTCGACTACCGG | GGC-tcTGTGACTACCGCTGG   | + | 4 | 2 | 0 | 6.06 | 3.03 |
| Chr10:21375920-21375942  | 2 | RNA | GGCCGAGGTCGACTACCGG | GgTgGAGGTCACACTCC-aggAG | + | 4 | 2 | 0 | 6.06 | 3.03 |
| Chr6:7725701-7725723     | 5 | DNA | GGCCGAGGTCGACTACCGG | GGCCGAGGTCGACTACCGG     | + | 5 | 2 | 0 | 6.06 | 3.03 |
| Chr8:59936404-59936426   | 2 | DNA | GGCCGAGGTCGACTACCGG | GgGcGAGTTCaACTCCGCGGAG  | + | 5 | 2 | 0 | 6.06 | 3.03 |
| Chr2:84193865-84193887   | 4 | RNA | GGCCGAGGTCGACTACCGG | GGCCGAGTTCaACTCCGCGG    | + | 5 | 2 | 0 | 6.06 | 3.03 |
| Chr4:151080712-151080734 | 5 | RNA | GGCCGAGGTCGACTACCGG | GGCCGAGTTCaACTCCGCGG    | + | 5 | 2 | 0 | 6.06 | 3.03 |
| Chr2:20305841-20305863   | 4 | RNA | GGCCGAGGTCGACTACCGG | GgCtGAGG-GgTcACTGCGGG   | + | 5 | 2 | 0 | 6.06 | 3.03 |
| Chr2:151877121-151877143 | 3 | DNA | GGCCGAGGTCGACTACCGG | GATGcAGGgTGCAGCaGCGGG   | + | 5 | 2 | 0 | 6.06 | 3.03 |
| Chr4:33372328-33372350   | 4 | RNA | GGCCGAGGTCGACTACCGG | aGcAGGAGGTCGAC-CGgGAG   | + | 5 | 2 | 0 | 6.06 | 3.03 |
| Chr8:100193135-100193157 | 3 | RNA | GGCCGAGGTCGACTACCGG | G-aCGGTCGACgACTCgGCGG   | + | 5 | 1 | 0 | 6.06 | 3.03 |
| Chr4:16146845-16146867   | 4 | RNA | GGCCGAGGTCGACTACCGG | TG-GAGGgAGcACTCgCGGG    | + | 5 | 2 | 0 | 6.06 | 3.03 |
| Chr4:18107698-18107720   | 2 | RNA | GGCCGAGGTCGACTACCGG | agAcAGGTCGACTACCGG      | + | 5 | 2 | 0 | 6.06 | 3.03 |
| Chr1:17007626-17007648   | 2 | RNA | GGCCGAGGTCGACTACCGG | GGC-CGAGGTCGACTACCGG    | + | 5 | 2 | 0 | 6.06 | 3.03 |
| Chr5:166179889-166179911 | 3 | RNA | GGCCGAGGTCGACTACCGG | GGC-AGGcCaCctCCGCGCG    | + | 5 | 1 | 0 | 6.06 | 3.03 |
| Chr3:68259948-68259970   | 4 | RNA | GGCCGAGGTCGACTACCGG | G-aCGGTCGACgCaCaGCGGG   | + | 5 | 2 | 0 | 6.06 | 3.03 |
| Chr5:20291371-20291393   | 4 | RNA | GGCCGAGGTCGACTACCGG | GgGcAGGcGCa-ACCgAGG     | + | 5 | 2 | 0 | 6.06 | 3.03 |
| Chr1:52972018-52972040   | 4 | RNA | GGCCGAGGTCGACTACCGG | GTCGG-GTgTcACACCGGAG    | + | 5 | 2 | 0 | 6.06 | 3.03 |
| Chr4:234537134-234537156 | 4 | DNA | GGCCGAGGTCGACTACCGG | GGCaGAGGTCGcGAGGCGGAG   | + | 5 | 2 | 0 | 6.06 | 3.03 |
| Chr3:106063514-106063536 | 5 | RNA | GGCCGAGGTCGACTACCGG | GTCGG-GTgTcACACCGGAG    | + | 5 | 2 | 0 | 6.06 | 3.03 |
| Chr1:117362439-117362461 | 2 | RNA | GGCCGAGGTCGACTACCGG | a-CGAGTCGACCaCaGAGG     | + | 4 | 2 | 0 | 6.06 | 3.03 |
| Chr7:95664010-95664032   | 2 | RNA | GGCCGAGGTCGACTACCGG | GGTCGAGGTCGAGT-CGCGGG   | + | 4 | 2 | 0 | 6.06 | 3.03 |
| Chr8:78627447-78627469   | 5 | RNA | GGCCGAGGTCGACTACCGG | G-CaAGGTCGAGTCGCGGAG    | + | 5 | 2 | 0 | 6.06 | 3.03 |
| Chr1:27107305-27107327   | 2 | RNA | GGCCGAGGTCGACTACCGG | GgGcGAGGTCG-TGgGAGG     | + | 5 | 2 | 0 | 6.06 | 3.03 |
| Chr8:163063070-163063092 | 2 | RNA | GGCCGAGGTCGACTACCGG | GGCCGAGGTCaACTCgGCGGG   | + | 5 | 1 | 0 | 6.06 | 3.03 |
| Chr1:230928743-230928765 | 4 | RNA | GGCCGAGGTCGACTACCGG | GcCaAGTTCGCTCCGCGAG     | + | 5 | 1 | 0 | 6.06 | 3.03 |
| Chr1:162962298-162962320 | 3 | RNA | GGCCGAGGTCGACTACCGG | GGCCACTcTgACTA-GRTTG    | + | 5 | 2 | 0 | 6.06 | 3.03 |
| Chr8:130470592-130470614 | 4 | RNA | GGCCGAGGTCGACTACCGG | G-aCGGTCGACCaGgCGGG     | + | 5 | 1 | 0 | 6.06 | 3.03 |
| Chr5:141155973-141155995 | 5 | RNA | GGCCGAGGTCGACTACCGG | GACCGAGTTCAGCaACCG-CCAG | + | 5 | 1 | 0 | 6.06 | 3.03 |
| Chr4:155949350-155949372 | 2 | RNA | GGCCGAGGTCGACTACCGG | GGCCAGTTCGACaA-IGCAAG   | + | 4 | 2 | 0 | 6.06 | 3.03 |
| Chr5:15533161-15533183   | 2 | RNA | GGCCGAGGTCGACTACCGG | GGH-GAGGTCGAGTTCGCGGG   | + | 5 | 1 | 0 | 6.06 | 3.03 |
| Chr1:268746054-268746076 | 2 | RNA | GGCCGAGGTCGACTACCGG | GTCGG-GTgTcACACCGGAG    | + | 5 | 2 | 0 | 6.06 | 3.03 |
| Chr5:196271711-196271733 | 4 | RNA | GGCCGAGGTCGACTACCGG | TGaaAGGc-ACACTCgCGGG    | + | 5 | 2 | 0 | 6.06 | 3.03 |
| Chr3:23432595-23432617   | 2 | RNA | GGCCGAGGTCGACTACCGG | GGCCGAGGTCGACTACCGG     | + | 5 | 2 | 0 | 6.06 | 3.03 |
| Chr4:49010447-49010469   | 4 | RNA | GGCCGAGGTCGACTACCGG | G-CAGGTCGcTcTgTCCGAG    | + | 5 | 2 | 0 | 6.06 | 3.03 |
| Chr10:29619551-29619573  | 5 | RNA | GGCCGAGGTCGACTACCGG | GG-CaCTGgTgGACTCCGCGG   | + | 5 | 2 | 0 | 6.06 | 3.03 |
| Chr3:211952508-211952530 | 4 | RNA | GGCCGAGGTCGACTACCGG | G-aCGGTCGACgCaGgCGGG    | + | 5 | 1 | 0 | 6.06 | 3.03 |
| Chr8:39542492-39542514   | 2 | RNA | GGCCGAGGTCGACTACCGG | GTCgAGGTCGAG-aCGCaCGG   | + | 5 | 1 | 0 | 6.06 | 3.03 |
| Chr10:6663614-6663636    | 3 | DNA | GGCCGAGGTCGACTACCGG | GCTCGGTCGcTCCGCTGG      | + | 5 | 1 | 0 | 6.06 | 3.03 |
| Chr6:81702532-81702554   | 2 | RNA | GGCCGAGGTCGACTACCGG | GTCGCaA-aAGTACCGGaaG    | + | 5 | 2 | 0 | 6.06 | 3.03 |
| Chr4:40538516-40538538   | 4 | DNA | GGCCGAGGTCGACTACCGG | GcCCaCaTGCCTACCGCGCCAG  | + | 5 | 2 | 0 | 6.06 | 3.03 |
| Chr6:83379081-83379103   | 5 | RNA | GGCCGAGGTCGACTACCGG | G-aCTAGGgGAGCACCgCGGG   | + | 5 | 1 | 0 | 6.06 | 3.03 |
| Chr9:143900795-143900817 | 3 | RNA | GGCCGAGGTCGACTACCGG | GCCAGGTCGCA-ATGtTGG     | + | 5 | 2 | 0 | 6.06 | 3.03 |
| Chr2:52432759-52432781   | 2 | RNA | GGCCGAGGTCGACTACCGG | GaaHAGGTCGACTACCGG      | + | 5 | 2 | 0 | 6.06 | 3.03 |
| Chr1:239824175-239824197 | 2 | RNA | GGCCGAGGTCGACTACCGG | GcCCGAGGTCGCA-ACtCGCGG  | + | 5 | 2 | 0 | 6.06 | 3.03 |
| Chr2:183812566-183812588 | 5 | DNA | GGCCGAGGTCGACTACCGG | GcCCGAGGTCGAGCaCCGCGGG  | + | 5 | 1 | 0 | 6.06 | 3.03 |
| Chr4:44956370-44956392   | 3 | RNA | GGCCGAGGTCGACTACCGG | TGc-AGGTCgTcAGgCGCGAG   | + | 5 | 2 | 0 | 6.06 | 3.03 |
| Chr4:201718685-201718707 | 2 | RNA | GGCCGAGGTCGACTACCGG | GTCGAGGTCG-CgCGGAG      | + | 5 | 1 | 0 | 6.06 | 3.03 |
| Chr3:13342931-13342953   | 3 | RNA | GGCCGAGGTCGACTACCGG | GGC-AGGcAGcACTCCGCGG    | + | 4 | 2 | 0 | 6.06 | 3.03 |
| Chr1:267072992-267073014 | 5 | DNA | GGCCGAGGTCGACTACCGG | GGCTCgGgGcTcCaCgCGCGGG  | + | 5 | 2 | 0 | 6.06 | 3.03 |
| Chr2:117524235-117524257 | 3 | RNA | GGCCGAGGTCGACTACCGG | cCG-CaCaGACTACCGCGGG    | + | 5 | 2 | 0 | 6.06 | 3.03 |
| Chr5:138036569-138036591 | 3 | RNA | GGCCGAGGTCGACTACCGG | GGC-AGGcCaCACCgCGGG     | + | 3 | 2 | 0 | 6.06 | 3.03 |
| Chr9:17768554-17768576   | 3 | RNA | GGCCGAGGTCGACTACCGG | GGC-AGGcCGgCACCgCGGG    | + | 5 | 2 | 0 | 6.06 | 3.03 |
| Chr2:20801575-20801597   | 5 | RNA | GGCCGAGGTCGACTACCGG | GGCCGAGTTCaACTCCGCGG    | + | 5 | 1 | 0 | 6.06 | 3.03 |
| Chr6:159629597-159629599 | 3 | DNA | GGCCGAGGTCGACTACCGG | GaCGGTCGAGGcCGgGCGGAG   | + | 5 | 2 | 0 | 6.06 | 3.03 |
| Chr5:24489734-24489756   | 3 | RNA | GGCCGAGGTCGACTACCGG | GCCGAGGTC-CTaCTCgCGAG   | + | 4 | 2 | 0 | 6.06 | 3.03 |
| Chr4:927905-927927       | 3 | RNA | GGCCGAGGTCGACTACCGG | GGCCGcG-GCaCaAaCgAAG    | + | 5 | 1 | 0 | 6.06 | 3.03 |
| Chr5:18605364-18605386   | 3 | RNA | GGCCGAGGTCGACTACCGG | GGCCGAGTcG-TgTcCGAGG    | + | 5 | 2 | 0 | 6.06 | 3.03 |
| Chr6:10600754-10600776   | 5 | RNA | GGCCGAGGTCGACTACCGG | GaCCAGGTCcTcGCa-GaCG    | + | 5 | 2 | 0 | 6.06 | 3.03 |
| Chr3:179281155-179281177 | 2 | RNA | GGCCGAGGTCGACTACCGG | GGCCGAGTTCgTCTC-GCGGG   | + | 3 | 2 | 0 | 6.06 | 3.03 |
| Chr1:89413185-89413207   | 3 | RNA | GGCCGAGGTCGACTACCGG | aGCCAGGcG-CaCtGgCGAG    | + | 5 | 1 | 0 | 6.06 | 3.03 |
| Chr8:37497992-37498014   | 3 | RNA | GGCCGAGGTCGACTACCGG | GgGTCGAGGcGCa-aaHAGGAGG | + | 5 | 1 | 0 | 6.06 | 3.03 |
| Chr8:83380376-83380398   | 3 | RNA | GGCCGAGGTCGACTACCGG | GGCCGTCGAGgAGCaACAG     | + | 5 | 1 | 0 | 6.06 | 3.03 |
| Chr4:85007047-85007069   | 5 | DNA | GGCCGAGGTCGACTACCGG | GcCCAGGTCGCTTgTACcCTGG  | + | 5 | 2 | 0 | 6.06 | 3.03 |
| Chr4:91487901-91487923   | 3 | RNA | GGCCGAGGTCGACTACCGG | GGCCGAGTTCcTCTC-GCCAG   | + | 5 | 1 | 0 | 6.06 | 3.03 |
| Chr8:134314717-134314739 | 5 | DNA | GGCCGAGGTCGACTACCGG | GGCCGAGGTCGcTcAGgCtCGGG | + | 5 | 1 | 0 | 6.06 | 3.03 |
| Chr1:17752534-17752556   | 3 | DNA | GGCCGAGGTCGACTACCGG | GaCaAGGTCaACTgTCTGCaTGG | + | 5 | 1 | 0 | 6.06 | 3.03 |
| Chr1:248317774-248317796 | 2 | RNA | GGCCGAGGTCGACTACCGG | GgHAG-CaACTAaCgTCAAG    | + | 5 | 2 | 0 | 6.06 | 3.03 |
| Chr2:33213866-33213888   | 3 | RNA | GGCCGAGGTCGACTACCGG | GgCaAGTcGAGg-CGCGAG     | + | 5 | 2 | 0 | 6.06 | 3.03 |
| Chr8:75568215-75568237   | 3 | RNA | GGCCGAGGTCGACTACCGG | GagCGA-TGcTcCaCCGCGAG   | + | 5 | 1 | 0 | 6.06 | 3.03 |
| Chr8:58903585-58903607   | 5 | X   | GGCCGAGGTCGACTACCGG | GGCCCaAGcGAGCaCaCGCGG   | + | 5 | 0 | 0 | 6.06 | 3.03 |
| Chr2:147395006-147395028 | 3 | DNA | GGCCGAGGTCGACTACCGG | GGCCAGGTCGAGgTgGCGGG    | + | 5 | 2 | 0 | 6.06 | 3.03 |
| Chr2:104049539-104049561 | 5 | RNA | GGCCGAGGTCGACTACCGG | ttCCAGGTCGCA-ACCgGCGAG  | + | 5 | 2 | 0 | 6.06 | 3.03 |
| Chr8:12098300-12098322   | 3 | RNA | GGCCGAG             |                         |   |   |   |   |      |      |

|                          |   |     |                           |                           |   |   |   |   |      |      |
|--------------------------|---|-----|---------------------------|---------------------------|---|---|---|---|------|------|
| Chr1:67539943-67539965   | 5 | RNA | GGCCGAGGTGCACTACCGGCRNG   | GcCCAGGcCGAgT-CGGIAGG     | - | 5 | 2 | 6 | 0.00 | 3.00 |
| Chr5:216890104-216890126 | 2 | RNA | GGCCGAGGTGCACTACCGGCRNG   | GG-GaAGTGAACtCAcCAAG      | + | 4 | 2 | 6 | 0.00 | 3.00 |
| Chr4:65705658-65705680   | 6 | RNA | GGCCGAGGTGCACTACCGGCRNG   | GGcCGAGG-GtTtCAcCaGgAGG   | + | 5 | 1 | 6 | 0.00 | 3.00 |
| Chr8:95257752-95257774   | 3 | RNA | GGCCGAGGTGCACTACCGGCRNG   | GACCGAGG-GGACaCaGgAGG     | + | 5 | 1 | 6 | 0.00 | 3.00 |
| Chr6:159611040-159611062 | 3 | RNA | GGCCGAGGTGCACTACCGGCRNG   | cTtCCAGgTAG               | + | 5 | 2 | 6 | 0.00 | 3.00 |
| Chr7:106612436-10661458  | 5 | RNA | GGCCGAGGTGCACTACCGGCRNG   | GcCGAGGTGCAcCaGgAGG       | - | 4 | 1 | 6 | 0.00 | 3.00 |
| Chr2:131651307-131651329 | 5 | RNA | GGCCGAGGTGCACTACCGGCRNG   | GgGcGAG-GcGcCaGCGCGGG     | - | 4 | 2 | 6 | 0.00 | 3.00 |
| Chr2:63726311-63726333   | 3 | RNA | GGCCGAGGTGCACTACCGGCRNG   | gCCtAGTGAACtCAcCAAG       | - | 4 | 2 | 6 | 0.00 | 3.00 |
| Chr3:132856517-132856539 | 3 | DNA | GGC-CGAGGTGCACTACCGGCRNG  | GGCTCGAGGTCAcCaGgCGGcCGG  | + | 4 | 2 | 6 | 0.00 | 3.00 |
| Chr5:211208289-211208311 | 5 | RNA | GGCCGAGGTGCACTACCGGCRNG   | GcCCAGTcT-CtCCAGgTGG      | - | 5 | 2 | 6 | 0.00 | 3.00 |
| Chr5:99721071-99721093   | 5 | RNA | GGCCGAGGTGCACTACCGGCRNG   | GgGcGgG-GcACcCAcCGCGGG    | - | 5 | 1 | 6 | 0.00 | 3.00 |
| Chr2:191038543-191038565 | 5 | RNA | GGCCGAGGTGCACTACCGGCRNG   | cCGCGGTGCAc-CtGgTATG      | - | 5 | 2 | 6 | 0.00 | 3.00 |
| Chr9:20794407-20794429   | 5 | RNA | GGCCGAGGTGCACTACCGGCRNG   | G-CtCGGgGcGAGtACCGGcAGG   | - | 5 | 1 | 6 | 0.00 | 3.00 |
| Chr3:12643969-12643991   | 5 | DNA | GGCCGAGGTGCACTACCGGCRNG   | GgAcCGAGTCTGcTACCGGcTGG   | - | 5 | 1 | 6 | 0.00 | 3.00 |
| Chr1:146155367-146155389 | 3 | RNA | GGCCGAGGTGCACTACCGGCRNG   | G-CtCGGgGcGAGtACCGGcAGG   | + | 5 | 1 | 6 | 0.00 | 3.00 |
| Chr2:72470284-72470306   | 3 | DNA | GGCCGAGGTGCACTACCGGCRNG   | GgGgACCGAGGcGAGcCGGcAAG   | + | 5 | 2 | 6 | 0.00 | 3.00 |
| Chr1:190346228-190346250 | 3 | RNA | GGCCGAGGTGCACTACCGGCRNG   | GcGcACAGTCC-GtTcCaGtTGG   | + | 5 | 2 | 6 | 0.00 | 3.00 |
| Chr3:70899041-70899063   | 5 | RNA | GGCCGAGGTGCACTACCGGCRNG   | GAcCGAGGcGtCHTCAcCG-CGGG  | - | 4 | 1 | 6 | 0.00 | 3.00 |
| Chr9:77411136-77411158   | 5 | RNA | GGCCGAGGTGCACTACCGGCRNG   | G-CcCGAGTgGcGctCGGcGAG    | - | 5 | 1 | 6 | 0.00 | 3.00 |
| Chr1:108825688-108825710 | 3 | RNA | GGCCGAGGTGCACTACCGGCRNG   | G-CcCAAGtAaCAcCAcCGTCTGG  | + | 5 | 1 | 6 | 0.00 | 3.00 |
| Chr2:225361920-225361942 | 5 | RNA | GGCCGAGGTGCACTACCGGCRNG   | actgGCGTCCACT-CCGCGCGG    | - | 5 | 1 | 6 | 0.00 | 3.00 |
| Chr5:71895882-71895904   | 5 | RNA | GGCCGAGGTGCACTACCGGCRNG   | GCGCGAGGTGcGcCAcC-ITGG    | - | 4 | 2 | 6 | 0.00 | 3.00 |
| Chr10:93666644-93666666  | 5 | RNA | GGCCGAGGTGCACTACCGGCRNG   | GctCAAGcC-TAaCGCGcAGG     | - | 5 | 2 | 6 | 0.00 | 3.00 |
| Chr3:34385661-34385683   | 3 | RNA | GGCCGAGGTGCACTACCGGCRNG   | G-CGAGTCTAGcCGCGCGGG      | - | 5 | 2 | 6 | 0.00 | 3.00 |
| Chr6:113142918-113142940 | 3 | RNA | GGCCGAGGTGCACTACCGGCRNG   | atTCGgGT-GtCCACCGCGCGGG   | + | 5 | 1 | 6 | 0.00 | 3.00 |
| Chr1:141654652-141654674 | 3 | RNA | GGCCGAGGTGCACTACCGGCRNG   | GcCGAGGTGCAcCaGgAGG       | - | 5 | 1 | 6 | 0.00 | 3.00 |
| Chr1:132746271-132746293 | 3 | RNA | GGCCGAGGTGCACTACCGGCRNG   | GcGcGtGCTGCAcCGCGCGGG     | - | 5 | 1 | 6 | 0.00 | 3.00 |
| Chr3:59560648-59560670   | 3 | RNA | GGCCGAGGTGCACTACCGGCRNG   | GgAcGgTCTGACT-CCGtTGG     | + | 5 | 1 | 6 | 0.00 | 3.00 |
| Chr9:118995348-118995370 | 3 | DNA | GGCCGAGGTGCACTACCGGCRNG   | GGCCGAGGTGCAcCaGgCGCGG    | + | 5 | 1 | 6 | 0.00 | 3.00 |
| Chr1:35071769-35071791   | 5 | X   | GGCCGAGGTGCACTACCGGCRNG   | GgCGGgGtGcGcAgCGCGCGG     | - | 5 | 0 | 6 | 0.00 | 3.00 |
| Chr10:99023149-99023171  | 5 | RNA | GGCCGAGGTGCACTACCGGCRNG   | GGC-tcGAGTCAcCAcCGTCTGG   | - | 4 | 2 | 6 | 0.00 | 3.00 |
| Chr6:43494395-43494417   | 5 | DNA | GGCCGAGGTGCACTACCGGCRNG   | GgGcGAGGTGCACTACCGGcTAG   | - | 5 | 1 | 6 | 0.00 | 3.00 |
| Chr5:18520067-18520089   | 5 | RNA | GGCCGAGGTGCACTACCGGCRNG   | cCGcAGTCTGACT-CCGG        | + | 5 | 2 | 6 | 0.00 | 3.00 |
| Chr10:142691979-14269201 | 5 | DNA | GGC-CGAGGTGCACTACCGGCRNG  | GGCTCGGgGcTCAcCaCGCGCGGG  | - | 5 | 2 | 6 | 0.00 | 3.00 |
| Chr4:225409632-225409654 | 3 | RNA | GGCCGAGGTGCACTACCGGCRNG   | GCCCGAGTcGcGcCaGgTAG      | + | 5 | 1 | 6 | 0.00 | 3.00 |
| Chr1:123923346-123923368 | 5 | RNA | GGCCGAGGTGCACTACCGGCRNG   | GCCcAGTCTGTA-TGGCTGG      | - | 5 | 2 | 6 | 0.00 | 3.00 |
| Chr2:124762213-124762235 | 3 | DNA | GGC-CGAGGTGCACTACCGGCRNG  | GCGCGGtGcGCTCGAcGgCGCAAG  | + | 5 | 1 | 6 | 0.00 | 3.00 |
| Chr5:178180723-178180745 | 3 | RNA | GGCCGAGGTGCACTACCGGCRNG   | t-CGgGcGtCHTCTCGCTGG      | + | 5 | 2 | 6 | 0.00 | 3.00 |
| Chr8:10689847-10689869   | 3 | RNA | GGCCGAGGTGCACTACCGGCRNG   | G-cGCGGTCTGCAcCaGgCGGG    | - | 5 | 1 | 6 | 0.00 | 3.00 |
| Chr7:46237825-46237847   | 3 | RNA | GGCCGAGGTGCACTACCGGCRNG   | Gg-AGTCTCAcCaGgCGAGG      | + | 5 | 2 | 6 | 0.00 | 3.00 |
| Chr2:157494426-157494448 | 5 | RNA | GGCCGAGGTGCACTACCGGCRNG   | GgGcGtGAGcGAGcCaGgAGG     | - | 5 | 2 | 6 | 0.00 | 3.00 |
| Chr9:14443523-14443545   | 3 | DNA | GGCCGAGGTGCACTACCGGCRNG   | GtTCAGATGTGAGTAgCGCGGAG   | + | 5 | 2 | 6 | 0.00 | 3.00 |
| Chr8:9467677-9467699     | 5 | RNA | GGCCGAGGTGCACTACCGGCRNG   | GGC-tcGAGTCAcCAcCGTCTGG   | - | 4 | 2 | 6 | 0.00 | 3.00 |
| Chr2:118140559-118140581 | 5 | RNA | GGCCGAGGTGCACTACCGGCRNG   | cCGcAaGAGTCTGc-GCGGG      | - | 5 | 2 | 6 | 0.00 | 3.00 |
| Chr9:8176195-8176217     | 3 | RNA | GGCCGAGGTGCACTACCGGCRNG   | GgTCcGtCCAGcCtCCCGCGGG    | + | 5 | 1 | 6 | 0.00 | 3.00 |
| Chr1:15512967-15512989   | 3 | RNA | GGCCGAGGTGCACTACCGGCRNG   | GcCGAGGTGCAcCaGgAGG       | - | 5 | 1 | 6 | 0.00 | 3.00 |
| Chr2:40746979-40747001   | 5 | RNA | GGCCGAGGTGCACTACCGGCRNG   | GcCCAGGcCGCA-ACtCGgTGG    | - | 5 | 2 | 6 | 0.00 | 3.00 |
| Chr5:38850092-38850114   | 5 | RNA | GGCCGAGGTGCACTACCGGCRNG   | tg-GAGTtGcCaACCGgTAG      | - | 5 | 2 | 6 | 0.00 | 3.00 |
| Chr2:199881248-199881270 | 5 | RNA | GGCCGAGGTGCACTACCGGCRNG   | t-CGgGcGtCHTCTCGCTGG      | - | 5 | 2 | 6 | 0.00 | 3.00 |
| Chr9:52723075-52723097   | 3 | RNA | GGCCGAGGTGCACTACCGGCRNG   | GcCAAG-CAcGATAggAGTAG     | + | 5 | 2 | 6 | 0.00 | 3.00 |
| Chr6:135676726-135676748 | 3 | RNA | GGCCGAGGTGCACTACCGGCRNG   | aaCCAGcTCG-gAaCGCGGG      | + | 5 | 2 | 6 | 0.00 | 3.00 |
| Chr2:149630337-149630359 | 3 | RNA | GGCCGAGGTGCACTACCGGCRNG   | GgGc-AGTcCAcCtCCCGCGGG    | + | 5 | 1 | 6 | 0.00 | 3.00 |
| Chr8:120335079-120335101 | 5 | RNA | GGCCGAGGTGCACTACCGGCRNG   | GgGc-HtGcGACTACCGTCTGG    | + | 4 | 2 | 6 | 0.00 | 3.00 |
| Chr5:8878585-88785307    | 3 | RNA | GGCCGAGGTGCACTACCGGCRNG   | GgAcAGTCTGACTA-agtCAAG    | + | 5 | 2 | 6 | 0.00 | 3.00 |
| Chr5:211083589-211083611 | 3 | RNA | GGCCGAGGTGCACTACCGGCRNG   | GcCGAGGcCGCAc-CcGtCAAG    | + | 5 | 2 | 6 | 0.00 | 3.00 |
| Chr8:60853116-60853138   | 5 | RNA | GGCCGAGGTGCACTACCGGCRNG   | GcGc-HtGcGACTACCGTCTGG    | + | 5 | 2 | 6 | 0.00 | 3.00 |
| Chr4:38855771-38855799   | 3 | RNA | GGCCGAGGTGCACTACCGGCRNG   | GgGc-AGGcAGcCAcCGCGCGGG   | + | 5 | 2 | 6 | 0.00 | 3.00 |
| Chr2:103752146-103752168 | 3 | DNA | GGCCGAGGTGCACTACCGGCRNG   | GcCGCGTtGACTAaCtCGcGAGG   | + | 5 | 2 | 6 | 0.00 | 3.00 |
| Chr4:22135726-22135748   | 3 | RNA | GGCCGAGGTGCACTACCGGCRNG   | cTtCCAGTcGcCT-CCGCGGG     | - | 5 | 1 | 6 | 0.00 | 3.00 |
| Chr1:281412146-281412168 | 5 | DNA | GGC-CGAGGTGCACTACCGGCRNG  | GCGCTCGGgGcTCAcCaCGCGCGGG | - | 5 | 2 | 6 | 0.00 | 3.00 |
| Chr9:55197101-55197123   | 5 | RNA | GGCCGAGGTGCACTACCGGCRNG   | GGC-AaCTCGcTCTCGCTGG      | - | 5 | 1 | 6 | 0.00 | 3.00 |
| Chr2:119960514-119960536 | 3 | DNA | G-CGCCGAGGTGCACTACCGGCRNG | GcCGAGGcCAcGcCAcCGCGCGGG  | + | 5 | 2 | 6 | 0.00 | 3.00 |
| Chr10:76266404-76266426  | 5 | RNA | GGCCGAGGTGCACTACCGGCRNG   | GcCGAGGcCGCAc-CcGtCAAG    | - | 5 | 2 | 6 | 0.00 | 3.00 |
| Chr4:69757015-69757037   | 5 | RNA | GGCCGAGGTGCACTACCGGCRNG   | G-cCGAGGTGCAcCaGgCGCGGG   | - | 4 | 1 | 6 | 0.00 | 3.00 |
| Chr2:29891318-29891340   | 5 | RNA | GGCCGAGGTGCACTACCGGCRNG   | Gg-GAGcTCAcCT-CCGCGAGG    | - | 4 | 2 | 6 | 0.00 | 3.00 |
| Chr8:38341080-38341102   | 5 | DNA | GGCCGAGGTGCACTACCGGCRNG   | GgGcCGAGGTGCAcCaGgAGG     | - | 5 | 2 | 6 | 0.00 | 3.00 |
| Chr3:23193788-23193810   | 5 | RNA | GGCCGAGGTGCACTACCGGCRNG   | G-HCGcCTCGcCAcCGCGCGGG    | - | 5 | 1 | 6 | 0.00 | 3.00 |
| Chr2:116690125-116690147 | 5 | RNA | GGCCGAGGTGCACTACCGGCRNG   | GcGcHtGCTGAGgACCGCGGG     | - | 5 | 1 | 6 | 0.00 | 3.00 |
| Chr2:5869429-5869451     | 5 | RNA | GGCCGAGGTGCACTACCGGCRNG   | GCGCGAGGcCAcCaGtCGCGGG    | - | 5 | 1 | 6 | 0.00 | 3.00 |
| Chr6:9777564-9777586     | 3 | RNA | GGCCGAGGTGCACTACCGGCRNG   | agCCAGTcT-CtCCGgGAG       | + | 5 | 2 | 6 | 0.00 | 3.00 |
| Chr9:61102069-61102091   | 5 | RNA | GGCCGAGGTGCACTACCGGCRNG   | tg-GAGgAGcAGcCAcCGTCTGG   | - | 5 | 2 | 6 | 0.00 | 3.00 |
| Chr1:27660438-27660460   | 3 | RNA | GGCCGAGGTGCACTACCGGCRNG   | GgAG-GAGTCAcAGcACCGCGAG   | - | 5 | 1 | 6 | 0.00 | 3.00 |
| Chr5:6822139-6822261     | 5 | RNA | GGCCGAGGTGCACTACCGGCRNG   | GGC-tcGgGACTACCGTCTGG     | - | 5 | 2 | 6 | 0.00 | 3.00 |
| Chr10:50542966-50542988  | 5 | RNA | GGCCGAGGTGCACTACCGGCRNG   | Gc-AGGcAGcAGcCAcCGCGGG    | + | 5 | 2 | 6 | 0.00 | 3.00 |
| Chr7:1563558-1563580     | 5 | RNA | GGCCGAGGTGCACTACCGGCRNG   | agCCAGGAGcAGcCAcCGCGAG    | - | 5 | 1 | 6 | 0.00 | 3.00 |
| Chr5:218328654-21832887  | 5 | RNA | GGCCGAGGTGCACTACCGGCRNG   | GcCGAGGTGCAcCaGgAGG       | - | 5 | 1 | 6 | 0.00 | 3.00 |
| Chr3:210170747-21017096  | 3 | RNA | GGCCGAGGTGCACTACCGGCRNG   | GCGCGcGcTtGc-TcCGCGAGGG   | + | 5 | 2 | 6 | 0.00 | 3.00 |
| Chr9:65079073-65079095   | 3 | RNA | GGCCGAGGTGCACTACCGGCRNG   | GCGc-AGGcCAcCtCCCGCGGG    | + | 4 | 2 | 6 | 0.00 | 3.00 |
| Chr6:72911352-72911374   | 4 | RNA | GGCCGAGGTGCACTACCGGCRNG   | G-cCGGgGCTGCAcCaGgCGGG    | - | 5 | 1 | 1 | 4.96 | 2.98 |
| Chr3:62192763-62192785   | 4 | RNA | GGCCGAGGTGCACTACCGGCRNG   | cCGCGAGTcCAaTATC-CTAG     | + | 5 | 2 | 1 | 4.96 | 2.98 |
| Chr2:33514086-33514108   | 3 | RNA | GGCCGAGGTGCACTACCGGCRNG   | GGC-AGGtCAcCtCCCGCGGG     | - | 5 | 2 | 2 | 3.86 | 2.93 |
| Chr4:191426183-191426205 | 4 | RNA | GGCCGAGGTGCACTACCGGCRNG   | caCAAGTCTGcCT-CCGCGCAG    | - | 5 | 1 | 2 | 3.86 | 2.93 |
| Chr5:82350877-82350899   | 3 | RNA | GGCCGAGGTGCACTACCGGCRNG   | GcCGAGGcCAcCtCAcCGCGGG    | - | 4 | 1 | 2 | 3.86 | 2.93 |
| Chr1:73313951-73313973   | 4 | RNA | GGCCGAGGTGCACTACCGGCRNG   | GGC-GAGGTGAGgGgGgGAG      | - | 5 | 1 | 3 | 2.75 | 2.88 |
| Chr10:6061312-6061334    | 5 | RNA | GGCCGAGGTGCACTACCGGCRNG   | GgGcAGTCTCAcCT-CCGCGAGG   | - | 4 | 1 | 4 | 1.65 | 2.83 |
| Chr10:10319082-10319104  | 5 | RNA | GGCCGAGGTGCACTACCGGCRNG   | Gg-GcCGAGGTGCAcCaGgAGG    | - | 5 | 2 | 4 | 1.65 | 2.76 |
| Chr3:12360771-12360793   | 3 | RNA | GGCCGAGGTGCACTACCGGCRNG   | atCCAGGcTCAc-CCGCGCAG     | - | 5 | 2 | 5 | 0.55 | 2.78 |
| Chr3:27939723-27939745   | 3 | DNA | GGCCGAGGTGCACTACCGGCRNG   | caGcAGGTGCAcCAcCGCGCGGG   | - | 4 | 1 | 0 | 5.51 | 2.76 |
| Chr4:32708440-32708462   | 3 | RNA | GGCCGAGGTGCACTACCGGCRNG   | cGgGAGGcGSA-ACaGgGAG      | + | 5 | 2 | 0 | 5.51 | 2.76 |
| Chr10:24810560-24810582  | 3 | RNA | GGCCGAGGTGCACTACCGGCRNG   | Gg-gcGtCAcCTGcTCAcGAGG    | + | 5 | 2 | 0 | 5.51 | 2.76 |
| Chr2:161671483-161671505 | 3 | RNA | GGCCGAGGTGCACTACCGGCRNG   | GCGCGAGGTAgcCAaT-CTGG     | + | 4 | 2 | 0 | 5.51 | 2.76 |
| Chr8:131056168-131056190 | 4 | RNA | GGCCGAGGTGCACTACCGGCRNG   | GGC-tcGgGACTACCGTCTGG     | + | 4 | 2 | 0 | 5.51 | 2.76 |
| Chr5:39204058-39204080   | 3 | RNA | GGCCGAGGTGCACTACCGGCRNG   | GgAcAAGTCTGc-TcCaGtTGG    | + | 5 | 2 | 0 | 5.51 | 2.76 |
| Chr5:114002789-114002811 | 3 | DNA | GGC-CGAGGTGCACTACCGGCRNG  | GaCAAGGtGCTGcAGcAGcCGGG   | - | 5 | 2 | 0 | 5.51 | 2.76 |
| Chr4:12783698-12783720   | 2 | DNA | GGCCGAGGTGCACTACCGGCRNG   | GgGcAGGcGCTGCAcCaGgCGAG   | + | 5 | 1 | 0 | 5.51 | 2.76 |
| Chr8:94701654-94701676   | 3 | RNA | GGCCGAGGTGCACTACCGGCRNG   | GaCCAGGcGSAcCaGgAGG       | - | 5 | 1 | 0 | 5.51 | 2.76 |
| Chr4:160175695-160175717 | 3 | RNA | GGCCGAGGTGCACTACCGGCRNG   | GGC-tcGcAGTCAcCGTCTGG     | + | 4 | 2 | 0 | 5.51 | 2.76 |
| Chr9:51972710-51972732   | 2 | DNA | GGCCGAGGTGCACTACCGGCRNG   | GcCGAGcAGcCAcCAGTGGCAG    | + | 4 | 2 | 0 | 5.51 | 2.76 |
| Chr2:24626185-24626207   | 2 | RNA | GGCCGAGGTGCACTACCGGCRNG   | GGC-tcGgGACTACCGTCTGG     | + | 4 | 2 | 0 | 5.51 | 2.76 |
| Chr8:136445037-136445059 | 2 | RNA | GGCCGAGGTGCACTACCGGCRNG   | GGCGc-GTCTGcAGcGgAGG      | + | 5 | 2 | 0 | 5.51 | 2.76 |
| Chr8:124912135-124912157 | 2 | DNA | GGCCGAGGTGCACTACCGGCRNG   | GGCCGAGGTGcCAcCGCGcAAG    | - | 5 | 1 | 0 | 5.51 | 2.76 |
| Chr6:91836601-91836623   | 2 | RNA | GGCCGAGGTGCACTACCGGCRNG   | GCGcAGTCTCAcCAcCGCGGG     | - | 5 | 1 | 0 | 5.51 | 2.76 |
| Chr8:143752936-143752958 | 4 | RNA | GGCCGAGGTGCACTACCGGCRNG   | Gg-AGG                    |   |   |   |   |      |      |

|                           |   |     |                           |                            |   |   |   |   |      |      |
|---------------------------|---|-----|---------------------------|----------------------------|---|---|---|---|------|------|
| Chr5:76511711-76511729    | 2 | RNA | GGCCGAGGTGCACTACCGGCGNRG  | GaCCGAGG-CGACgAcaGAGG      | + | 5 | 1 | 0 | 5.51 | 2.76 |
| Chr8:65327322-65327344    | 2 | RNA | GGCCGAGGTGCACTACCGGCGNRG  | gCCCGAGGTGAACTCCG-AGAG     | - | 5 | 1 | 0 | 5.51 | 2.76 |
| Chr10:64853316-64853338   | 2 | RNA | GGCCGAGGTGCACTACCGGCGNRG  | GgCGAGGcGACT-CGcCAAG       | + | 5 | 2 | 0 | 5.51 | 2.76 |
| Chr4:50989463-50989485    | 2 | RNA | GGCCGAGGTGCACTACCGGCGNRG  | GagaGgGTGCTGcT-CGGCCGG     | - | 5 | 2 | 0 | 5.51 | 2.76 |
| Chr5:138899230-138899252  | 2 | RNA | GGCCGAGGTGCACTACCGGCGNRG  | tCCGAGTGCATTA-AGcAGG       | + | 5 | 2 | 0 | 5.51 | 2.76 |
| Chr2:1889307-1889311      | 2 | RNA | GGCCGAGGTGCACTACCGGCGNRG  | GgCGAGGTGcG-AGGAGTGGG      | + | 5 | 2 | 0 | 5.51 | 2.76 |
| Chr4:45282082-45282104    | 4 | RNA | GGCCGAGGTGCACTACCGGCGNRG  | G-cCGGTGTGCAcAaGgCGGG      | + | 5 | 1 | 0 | 5.51 | 2.76 |
| Chr7:10962590-10962612    | 5 | RNA | GGCCGAGGTGCACTACCGGCGNRG  | GgACGAGcTCCGCT-GGCTGG      | - | 5 | 1 | 0 | 5.51 | 2.76 |
| Chr4:204318800-204318822  | 2 | RNA | GGCCGAGGTGCACTACCGGCGNRG  | G-CGGGTGATgACtGAGCGG       | - | 5 | 2 | 0 | 5.51 | 2.76 |
| Chr4:20023417-20023439    | 2 | RNA | GGCCGAGGTGCACTACCGGCGNRG  | GGCCAGGTGCAgAg-CGtGGG      | + | 5 | 2 | 0 | 5.51 | 2.76 |
| Chr3:152334774-152334796  | 4 | RNA | GGCCGAGGTGCACTACCGGCGNRG  | GGC-AGGcCGAGcActaCGCGG     | - | 5 | 2 | 0 | 5.51 | 2.76 |
| Chr1:111975100-111975118  | 3 | DNA | GGC-CGAGGTGCACTACCGGCGNRG | GaCAACGgGTGCGAGcAgaCGGG    | - | 5 | 2 | 0 | 5.51 | 2.76 |
| Chr4:173332208-173332230  | 2 | RNA | GGCCGAGGTGCACTACCGGCGNRG  | TGgCGAGGTGgAgg-CGGGAGG     | + | 5 | 2 | 0 | 5.51 | 2.76 |
| Chr2:194479906-194479928  | 2 | RNA | GGCCGAGGTGCACTACCGGCGNRG  | TGtaGAGT-GaATACCGCTGG      | - | 5 | 1 | 0 | 5.51 | 2.76 |
| Chr5:7230321-7230343      | 2 | RNA | GGCCGAGGTGCACTACCGGCGNRG  | GGCCGcGTGcGCT-CGCTGG       | + | 5 | 2 | 0 | 5.51 | 2.76 |
| Chr5:112241586-112241608  | 4 | RNA | GGCCGAGGTGCACTACCGGCGNRG  | GGCCGAGGTGCAcAgCGCGG       | + | 4 | 1 | 0 | 5.51 | 2.76 |
| Chr2:122542398-122542420  | 5 | RNA | GGCCGAGGTGCACTACCGGCGNRG  | GGCAGcTCACT-CGCGCGAG       | - | 5 | 2 | 0 | 5.51 | 2.76 |
| Chr8:75250363-75250385    | 5 | RNA | GGCCGAGGTGCACTACCGGCGNRG  | GGCCGAGGcGCTg-CGGCTG       | - | 5 | 1 | 0 | 5.51 | 2.76 |
| Chr4:8562958-8562980      | 4 | DNA | GGCCGAGGTGCACTACCGGCGNRG  | agCCGAGcTcGACTCCGcCAAG     | - | 4 | 1 | 0 | 5.51 | 2.76 |
| Chr5:145171136-145171158  | 5 | RNA | GGCCGAGGTGCACTACCGGCGNRG  | G-CcAGATgACTCGcCTGG        | + | 5 | 1 | 0 | 5.51 | 2.76 |
| Chr2:108353742-108353764  | 4 | RNA | GGCCGAGGTGCACTACCGGCGNRG  | GaC-AGGTGCAcCaAGtGAG       | + | 5 | 2 | 0 | 5.51 | 2.76 |
| Chr6:139324076-139324098  | 3 | RNA | GGCCGAGGTGCACTACCGGCGNRG  | GcCGAGcTcGAC-CGcCAAG       | + | 5 | 2 | 0 | 5.51 | 2.76 |
| Chr1:95966370-95966392    | 3 | DNA | GGCCGAGGTGCACTACCGGCGNRG  | GGCCGAGGcCGAcCaGtAGAGG     | - | 5 | 1 | 0 | 5.51 | 2.76 |
| Chr7:116767343-116767365  | 2 | DNA | GGCCGAGGTGCACTACCGGCGNRG  | GGCCGAGGcCGAggCTCGCGGG     | - | 5 | 1 | 0 | 5.51 | 2.76 |
| Chr8:102046492-102046514  | 2 | RNA | GGCCGAGGTGCACTACCGGCGNRG  | GGCC-AGGTGCTcACTCGCGGG     | + | 3 | 1 | 0 | 5.51 | 2.76 |
| Chr10:105155678-105155700 | 3 | DNA | GGCCGAGGTGCACTACCGGCGNRG  | GcCGGAGcGgG-TAGCGCGGG      | + | 5 | 2 | 0 | 5.51 | 2.76 |
| Chr4:85296426-85296448    | 5 | DNA | GGCCGAGGTGCACTACCGGCGNRG  | GaCTCGAGGTGcTcACTCCGcCAAG  | + | 5 | 2 | 0 | 5.51 | 2.76 |
| Chr7:9670804-9670806      | 4 | RNA | GGCCGAGGTGCACTACCGGCGNRG  | GgACAGGTGCAgAg-CGGCGG      | + | 4 | 1 | 0 | 5.51 | 2.76 |
| Chr8:106926614-106926636  | 3 | DNA | GGCCGAGGTGCACTACCGGCGNRG  | GGCCCCGgTcGACTcCGGAGG      | + | 5 | 2 | 0 | 5.51 | 2.76 |
| Chr8:22618385-22618389    | 2 | DNA | GGCCGAGGTGCACTACCGGCGNRG  | GGCCAGGTGCACTACCGGCGNRG    | + | 5 | 1 | 0 | 5.51 | 2.76 |
| Chr9:100306060-100306082  | 5 | RNA | GGCCGAGGTGCACTACCGGCGNRG  | GGAGAGcGcTAC-CcCGCGG       | + | 5 | 2 | 0 | 5.51 | 2.76 |
| Chr1:218649619-218649641  | 4 | RNA | GGCCGAGGTGCACTACCGGCGNRG  | tCCGAG-CagCTAcCGCGAG       | - | 5 | 2 | 0 | 5.51 | 2.76 |
| Chr4:35292644-35292666    | 2 | RNA | GGCCGAGGTGCACTACCGGCGNRG  | agCaAGGTGCT-CtACAGCGAG     | + | 4 | 2 | 0 | 5.51 | 2.76 |
| Chr2:214053615-214053637  | 3 | RNA | GGCCGAGGTGCACTACCGGCGNRG  | G-cCGGgTCCGAcCaGgCGGG      | - | 5 | 1 | 0 | 5.51 | 2.76 |
| Chr8:47814225-47814247    | 4 | RNA | GGCCGAGGTGCACTACCGGCGNRG  | Gg-GGcGcTGGACCGCGAG        | - | 5 | 2 | 0 | 5.51 | 2.76 |
| Chr3:158011792-158011814  | 4 | RNA | GGCCGAGGTGCACTACCGGCGNRG  | G-cGgGTGCTGcTcAGTGGAG      | + | 5 | 1 | 0 | 5.51 | 2.76 |
| Chr9:76069600-76069622    | 2 | DNA | GGCCGAGGTGCACTACCGGCGNRG  | GGCCGAGGTGCACTACCGGCGNRG   | + | 5 | 2 | 0 | 5.51 | 2.76 |
| Chr5:5049058-5049080      | 5 | RNA | GGCCGAGGTGCACTACCGGCGNRG  | TCGcGgTcTcTACC-CTGG        | - | 5 | 2 | 0 | 5.51 | 2.76 |
| Chr4:117007892-117007914  | 4 | RNA | GGCCGAGGTGCACTACCGGCGNRG  | GGCCGAGGTGCACTACCGGCGNRG   | + | 3 | 1 | 0 | 5.51 | 2.76 |
| Chr8:118315427-118315449  | 4 | X   | GGCCGAGGTGCACTACCGGCGNRG  | GgCaAGcGACTAgCaGcAGG       | + | 5 | 0 | 0 | 5.51 | 2.76 |
| Chr3:64552259-64552281    | 2 | DNA | GGCCGAGGTGCACTACCGGCGNRG  | GggGAGGAgACTACCGCGGG       | + | 5 | 1 | 0 | 5.51 | 2.76 |
| Chr5:111781100-111781122  | 5 | RNA | GGCCGAGGTGCACTACCGGCGNRG  | GgCCAGcTCACT-CGCGCGAG      | - | 5 | 1 | 0 | 5.51 | 2.76 |
| Chr4:11473236-11473258    | 2 | RNA | GGCCGAGGTGCACTACCGGCGNRG  | agGtTAGTGCaCa-GGCCGG       | - | 5 | 2 | 0 | 5.51 | 2.76 |
| Chr7:12938860-12938882    | 3 | RNA | GGCCGAGGTGCACTACCGGCGNRG  | G-cAGAGTGCACAGgCGGG        | - | 4 | 1 | 1 | 4.41 | 2.71 |
| Chr3:130431026-130431048  | 3 | RNA | GGCCGAGGTGCACTACCGGCGNRG  | GG-CAGcTcGACTCCGCGNRG      | - | 5 | 1 | 2 | 3.30 | 2.65 |
| Chr7:74528155-74528177    | 3 | DNA | GGCCGAGGTGCACTACCGGCGNRG  | GACTCGAGGTGcTcAGTGGAG      | + | 4 | 2 | 3 | 3.30 | 2.65 |
| Chr1:183300743-183300765  | 4 | RNA | GGCCGAGGTGCACTACCGGCGNRG  | G-CcMGcGcGACTAGCGGAGG      | + | 5 | 1 | 3 | 2.20 | 2.60 |
| Chr2:151640455-151640477  | 3 | RNA | GGCCGAGGTGCACTACCGGCGNRG  | G-cCGGgTCCGAGcAGgCGGG      | - | 5 | 1 | 4 | 1.10 | 2.55 |
| Chr5:218406195-218406217  | 3 | RNA | GGCCGAGGTGCACTACCGGCGNRG  | cG-GAGGgGAAcTcCGcTGG       | + | 5 | 2 | 4 | 1.10 | 2.55 |
| Chr7:172676964-172676986  | 3 | RNA | GGCCGAGGTGCACTACCGGCGNRG  | tGGCAGTGG-TcCGCTGG         | + | 5 | 2 | 5 | 0.00 | 2.50 |
| Chr9:7785646-7785668      | 5 | DNA | GGCCGAGGTGCACTACCGGCGNRG  | cGgCAGGcTcGACTCCGCGNRG     | - | 5 | 2 | 5 | 0.00 | 2.50 |
| Chr3:41459758-41459780    | 3 | RNA | GGCCGAGGTGCACTACCGGCGNRG  | caCCGAGGTGAG-CCGAGG        | + | 5 | 2 | 5 | 0.00 | 2.50 |
| Chr2:127323580-127323602  | 5 | RNA | GGCCGAGGTGCACTACCGGCGNRG  | agHcAGTCTGACTC-ICGAG       | - | 5 | 2 | 5 | 0.00 | 2.50 |
| Chr8:58388506-58388528    | 5 | RNA | GGCCGAGGTGCACTACCGGCGNRG  | GGTcGAG-TcTACTAcctAAG      | - | 5 | 1 | 5 | 0.00 | 2.50 |
| Chr7:55023024-55023046    | 5 | RNA | GGCCGAGGTGCACTACCGGCGNRG  | agCCAGGcTgTcGCT-CGgCTGG    | - | 5 | 1 | 5 | 0.00 | 2.50 |
| Chr3:12078784-12078796    | 3 | RNA | GGCCGAGGTGCACTACCGGCGNRG  | Gg-AGGcTcGCTGcTGGAG        | + | 5 | 1 | 0 | 0.00 | 2.50 |
| Chr5:45619841-45619863    | 3 | RNA | GGCCGAGGTGCACTACCGGCGNRG  | G-CGAGGTGCACTACCGGCGNRG    | + | 3 | 2 | 5 | 0.00 | 2.50 |
| Chr3:17913195-17913217    | 5 | RNA | GGCCGAGGTGCACTACCGGCGNRG  | cGCaACTGACTACCa-CGAG       | - | 5 | 1 | 5 | 0.00 | 2.50 |
| Chr4:133565679-133565701  | 5 | RNA | GGCCGAGGTGCACTACCGGCGNRG  | GgGcTcGCT-CtGgGcGAGG       | - | 5 | 2 | 5 | 0.00 | 2.50 |
| Chr9:154291337-154291359  | 5 | RNA | GGCCGAGGTGCACTACCGGCGNRG  | agCaAG-CaCaACTCCGAG        | + | 5 | 2 | 5 | 0.00 | 2.50 |
| Chr10:65936308-65936330   | 5 | RNA | GGCCGAGGTGCACTACCGGCGNRG  | GTCcG-GTgCaACTCCGAG        | - | 5 | 2 | 5 | 0.00 | 2.50 |
| Chr2:231454238-231454260  | 3 | RNA | GGCCGAGGTGCACTACCGGCGNRG  | GGCCAGcGAcCaGcAG-CGAG      | + | 5 | 2 | 5 | 0.00 | 2.50 |
| Chr7:120068997-120069019  | 3 | RNA | GGCCGAGGTGCACTACCGGCGNRG  | GgTcAGGTGcTcTc-GGCGAG      | + | 5 | 1 | 5 | 0.00 | 2.50 |
| Chr1:192787286-192787308  | 3 | DNA | GGCCGAGGTGCACTACCGGCGNRG  | GggCGAGGTGCACTcGgGAGG      | + | 5 | 1 | 5 | 0.00 | 2.50 |
| Chr5:103391091-103391113  | 5 | RNA | GGCCGAGGTGCACTACCGGCGNRG  | Gg-GAaGcTcGAAcTCCGCGAG     | - | 5 | 2 | 5 | 0.00 | 2.50 |
| Chr10:3803698-3803699     | 5 | RNA | GGCCGAGGTGCACTACCGGCGNRG  | GaggGAGTGCATG-TcGGAGG      | + | 5 | 2 | 5 | 0.00 | 2.50 |
| Chr8:171311548-171311570  | 5 | DNA | GGCCGAGGTGCACTACCGGCGNRG  | cGCTGAGGTGCACTAGCGGAG      | - | 5 | 1 | 5 | 0.00 | 2.50 |
| Chr1:97695165-97695187    | 3 | RNA | GGCCGAGGTGCACTACCGGCGNRG  | GG-GAGATgACTcCGGAGG        | + | 5 | 2 | 5 | 0.00 | 2.50 |
| Chr8:144061144-144061166  | 5 | RNA | GGCCGAGGTGCACTACCGGCGNRG  | GgGcG-GGcCaCTcCGCTGG       | - | 5 | 1 | 5 | 0.00 | 2.50 |
| Chr5:223785019-223785041  | 5 | RNA | GGCCGAGGTGCACTACCGGCGNRG  | GGCCGgGcCaCaCa-CGCTGG      | - | 5 | 2 | 5 | 0.00 | 2.50 |
| Chr1:217765429-217765451  | 5 | DNA | GGCCGAGGTGCACTACCGGCGNRG  | GCaTcAGTcGACTCAcCGGATGG    | - | 5 | 2 | 5 | 0.00 | 2.50 |
| Chr8:85459239-85459261    | 3 | RNA | GGCCGAGGTGCACTACCGGCGNRG  | GgACAGGATg-ggCGCGGG        | + | 4 | 2 | 5 | 0.00 | 2.50 |
| Chr7:1512817-1512839      | 5 | RNA | GGCCGAGGTGCACTACCGGCGNRG  | GTCAGcGgCGGT-CtGgGgG       | - | 5 | 2 | 5 | 0.00 | 2.50 |
| Chr1:211205132-211205154  | 5 | RNA | GGCCGAGGTGCACTACCGGCGNRG  | G-cCGGgTCCGAcCaGgCGGG      | - | 5 | 1 | 5 | 0.00 | 2.50 |
| Chr6:159078741-159078763  | 3 | RNA | GGCCGAGGTGCACTACCGGCGNRG  | GcTgAGcTcGCA-CGtCAGG       | + | 5 | 2 | 5 | 0.00 | 2.50 |
| Chr1:13041725-13041747    | 3 | RNA | GGCCGAGGTGCACTACCGGCGNRG  | GcCGAGGTGCACTACCGGCGNRG    | + | 5 | 2 | 5 | 0.00 | 2.50 |
| Chr1:162784612-162784634  | 5 | RNA | GGCCGAGGTGCACTACCGGCGNRG  | GGCCGACTcGc-ActcAGCAG      | - | 5 | 2 | 5 | 0.00 | 2.50 |
| Chr6:144539158-144539180  | 3 | DNA | GGCCGAGGTGCACTACCGGCGNRG  | GaCAACGgGTGCGAGcAgaGCGGG   | + | 5 | 2 | 5 | 0.00 | 2.50 |
| Chr2:65855349-65855371    | 5 | DNA | GGCCGAGGTGCACTACCGGCGNRG  | GgCGAGGTGCACTcCaGCGCGG     | - | 5 | 2 | 5 | 0.00 | 2.50 |
| Chr10:86321315-86321337   | 3 | RNA | GGCCGAGGTGCACTACCGGCGNRG  | agCCGAGGcTcGCT-CGcGCTGG    | - | 5 | 1 | 5 | 0.00 | 2.50 |
| Chr4:46369098-46369120    | 3 | RNA | GGCCGAGGTGCACTACCGGCGNRG  | GaCCcATgGcAGgAg-CGCGG      | + | 5 | 2 | 5 | 0.00 | 2.50 |
| Chr7:66541582-66541604    | 3 | RNA | GGCCGAGGTGCACTACCGGCGNRG  | GgCaAGcAGgCaCaG-CGCGAG     | + | 5 | 2 | 5 | 0.00 | 2.50 |
| Chr10:136500128-136500150 | 3 | RNA | GGCCGAGGTGCACTACCGGCGNRG  | GgGcCAcGT-ActcAGGgGgG      | - | 4 | 2 | 5 | 0.00 | 2.50 |
| Chr10:9711459-9711481     | 3 | RNA | GGCCGAGGTGCACTACCGGCGNRG  | TgGagAGGgC-CTAcTcCAGG      | - | 5 | 2 | 5 | 0.00 | 2.50 |
| Chr10:77052172-77052194   | 3 | RNA | GGCCGAGGTGCACTACCGGCGNRG  | GGCCGAGGTGCACTCCGCTGG      | - | 4 | 2 | 5 | 0.00 | 2.50 |
| Chr9:6047959-6047981      | 3 | RNA | GGCCGAGGTGCACTACCGGCGNRG  | GgCGAGG-AGGcTcGACTCCGCGNRG | + | 5 | 2 | 5 | 0.00 | 2.50 |
| Chr10:135176533-135176555 | 3 | DNA | GGCCGAGGTGCACTACCGGCGNRG  | GgCtCGgGTCCGAcTcCGCGCGGG   | + | 5 | 2 | 5 | 0.00 | 2.50 |
| Chr1:208246274-208246296  | 3 | RNA | GGCCGAGGTGCACTACCGGCGNRG  | GtCaAGcAG-CAc-CGCGAGG      | + | 5 | 2 | 5 | 0.00 | 2.50 |
| Chr6:33387550-33387572    | 3 | RNA | GGCCGAGGTGCACTACCGGCGNRG  | eCCGAGGTG-TcCaGgAGAG       | + | 5 | 2 | 5 | 0.00 | 2.50 |
| Chr3:211293273-211293295  | 5 | RNA | GGCCGAGGTGCACTACCGGCGNRG  | agC-AGgGcGcTcCGCGAGG       | + | 5 | 2 | 5 | 0.00 | 2.50 |
| Chr7:66242738-66242760    | 5 | RNA | GGCCGAGGTGCACTACCGGCGNRG  | GGCCG-GTcCaCTcGcAGAGG      | - | 5 | 2 | 5 | 0.00 | 2.50 |
| Chr10:111236500-111236522 | 5 | RNA | GGCCGAGGTGCACTACCGGCGNRG  | cGAc-GTcGCaACTCCGCGAG      | - | 5 | 2 | 5 | 0.00 | 2.50 |
| Chr10:124294629-124294651 | 3 | RNA | GGCCGAGGTGCACTACCGGCGNRG  | G-cAGGgTCCGAcCaGgCGGG      | + | 5 | 1 | 5 | 0.00 | 2.50 |
| Chr4:123728515-123728537  | 3 | DNA | GGCCGAGGTGCACTACCGGCGNRG  | GcCCGAGGTGcCaACTCCGCGAG    | + | 4 | 2 | 5 | 0.00 | 2.50 |
| Chr1:292730640-292730662  | 5 | DNA | GGCCGAGGTGCACTACCGGCGNRG  | GgCGAGGTGCTGGACTcATcCGG    | - | 5 | 2 | 5 | 0.00 | 2.50 |
| Chr4:180225805-180225827  | 3 | RNA | GGCCGAGGTGCACTACCGGCGNRG  | G-cGgGTCCGAcCaGcCGG        | + | 5 | 1 | 5 | 0.00 | 2.50 |
| Chr2:169572671-169572693  | 3 | DNA | GGCCGAGGTGCACTACCGGCGNRG  | GgCcaAGgGgAAACTCCGCGAG     | + | 5 | 2 | 5 | 0.00 | 2.50 |
| Chr10:98651813-98651835   | 5 | DNA | GGCCGAGGTGCACTACCGGCGNRG  | GgCGAGGTGCTcGcTCCGCGAG     | - | 4 | 1 | 5 | 0.00 | 2.50 |
| Chr5:109297039-109297061  | 5 | RNA | GGCCGAGGTGCACTACCGGCGNRG  | GgTcGATcTcG-TATcCaCAAG     | - | 4 | 1 | 5 | 0.00 | 2.50 |
| Chr2:16319893-16319915    | 5 | RNA | GGCCGAGGTGCACTACCGGCGNRG  | GTCcAGG-CaCaCaGcCGGG       | - | 5 | 1 | 5 | 0.00 | 2.50 |
| Chr3:223007823-223007845  | 5 | RNA | GGCCGAGGTGCACTACCGGCGNRG  | GaCCGAGaaACT-CGCGCGAG      | - | 5 | 1 | 5 | 0.00 | 2.50 |
| Chr5:176728105-176728127  | 5 | RNA | GGCCGAGGTGCACTACCGGCGNRG  | GgC-AGGgTgAGgagCGCGAG      | - | 5 | 1 | 5 | 0.00 | 2.50 |



|                          |   |     |                           |                           |   |   |   |   |      |      |
|--------------------------|---|-----|---------------------------|---------------------------|---|---|---|---|------|------|
| Chr4:70087974-70087996   | 3 | RNA | GGCCGAGGTCGACTACCGGCRNG   | GcCCAGGacCaCaCC-ITGG      | + | 5 | 2 | 5 | 0.00 | 2.50 |
| Chr6:61773294-61773316   | 3 | DNA | GGCCGAGGTCG-ACCTACCGGCRNG | GGCCGAGTCGGAGCcaCaCGGG    | + | 5 | 1 | 5 | 0.00 | 2.50 |
| Chr3:9295106-9295128     | 3 | RNA | GGCCGAGGTCGACTACCGGCRNG   | GgGcG-GgcCaCctCCGGCCGG    | + | 5 | 1 | 5 | 0.00 | 2.50 |
| Chr7:101933327-101933349 | 5 | RNA | GGCCGAGGTCGACTACCGGCRNG   | GGCCAG-agaTtGcaGCGCCGG    | - | 5 | 2 | 5 | 0.00 | 2.50 |
| Chr3:129442814-129442836 | 5 | RNA | GGCCGAGGTCGACTACCGGCRNG   | GaCaG-IGTCGCaCaCgGCGGG    | - | 5 | 1 | 5 | 0.00 | 2.50 |
| Chr3:145021398-145021415 | 3 | RNA | GGCCGAGGTCGACTACCGGCRNG   | GGCCGAGGTCGACTACCGGCRNG   | + | 5 | 1 | 5 | 0.00 | 2.50 |
| Chr3:239838730-239838752 | 3 | RNA | GGCCGAGGTCGACTACCGGCRNG   | GCG-ITGGGACTACCGGCTGG     | + | 4 | 2 | 5 | 0.00 | 2.50 |
| Chr1:198971584-198971606 | 3 | DNA | GGCCGAGGTC-AG8TACCAGGCRNG | GcCCAGcTGGCGACTCcaGcCAAG  | + | 4 | 2 | 5 | 0.00 | 2.50 |
| Chr3:97830725-97830747   | 5 | DNA | GGCCGAGGTCGA-CTACCAGGCRNG | GGcGAGGtTgGAGGCTgtGGCAAG  | - | 5 | 2 | 5 | 0.00 | 2.50 |
| Chr1:194591431-194591453 | 5 | RNA | GGCCGAGGTCGACTACCGGCRNG   | GgaCAccGACT-CCGRTAG       | - | 5 | 1 | 5 | 0.00 | 2.50 |
| Chr10:81885111-81885133  | 3 | RNA | GGCCGAGGTCGACTACCGGCRNG   | GCCG-GTgCaACCgCaCAG       | + | 5 | 2 | 5 | 0.00 | 2.50 |
| Chr2:161400844-161400866 | 3 | RNA | GGCCGAGGTCGACTACCGGCRNG   | GGCCGAGGTCGCT-CgGCTGG     | + | 4 | 1 | 5 | 0.00 | 2.50 |
| Chr4:23415534-23415556   | 3 | RNA | GGCCGAGGTCGACTACCGGCRNG   | ITGCCAaGcGAC-AGCaCAGG     | + | 5 | 1 | 5 | 0.00 | 2.50 |
| Chr3:156398865-156398887 | 5 | RNA | GGCCGAGGTCGACTACCGGCRNG   | GCCG-ITGGGACTACCGGCTGG    | - | 5 | 2 | 5 | 0.00 | 2.50 |
| Chr2:4492552-4492574     | 3 | RNA | GGCCGAGGTCGACTACCGGCRNG   | G-ITCGAGcAGGACTCCGCGAGG   | + | 5 | 1 | 5 | 0.00 | 2.50 |
| Chr2:199451763-199451785 | 3 | RNA | GGCCGAGGTCGACTACCGGCRNG   | GGCCGAGGTCGACTACCGGCRNG   | + | 5 | 2 | 5 | 0.00 | 2.50 |
| Chr1:182580711-182580733 | 5 | RNA | GGCCGAGGTCGACTACCGGCRNG   | GGCCGACTCGcCa-AGCaAG      | + | 5 | 2 | 5 | 0.00 | 2.50 |
| Chr4:206598736-206598758 | 5 | RNA | GGCCGAGGTCGACTACCGGCRNG   | GgaCAAGCT-GaCAGcGcGAGG    | - | 5 | 1 | 5 | 0.00 | 2.50 |
| Chr3:100225721-100225738 | 3 | RNA | GGCCGAGGTCGACTACCGGCRNG   | GaCCAAGGTCaCTcG-CTGG      | + | 5 | 2 | 5 | 0.00 | 2.50 |
| Chr2:59873070-59873092   | 3 | RNA | GGCCGAGGTCGACTACCGGCRNG   | GCG-ITGGGACTACCGGCTGG     | + | 3 | 2 | 5 | 0.00 | 2.50 |
| Chr1:137635972-137635994 | 3 | RNA | GGCCGAGGTCGACTACCGGCRNG   | GGCCGACTCG-actCaCaAG      | + | 5 | 2 | 5 | 0.00 | 2.50 |
| Chr2:34031210-34031232   | 3 | RNA | GGCCGAGGTCGACTACCGGCRNG   | G-CAcAGcAGCccGcGcGAG      | + | 5 | 2 | 5 | 0.00 | 2.50 |
| Chr1:218040835-218040857 | 3 | RNA | GGCCGAGGTCGACTACCGGCRNG   | GGcGAGGTCG-ITgGtaAG       | + | 5 | 2 | 5 | 0.00 | 2.50 |
| Chr1:118689618-118689640 | 5 | RNA | GGCCGAGGTCGACTACCGGCRNG   | tagCGAGTgGcGtCAC-GGCGG    | - | 5 | 2 | 5 | 0.00 | 2.50 |
| Chr10:13736849-13736871  | 3 | RNA | GGCCGAGGTCGACTACCGGCRNG   | GTCrGAGG-actTcaaaCCGG     | + | 4 | 2 | 5 | 0.00 | 2.50 |
| Chr7:123278711-123278733 | 5 | RNA | GGCCGAGGTCGACTACCGGCRNG   | GGCCGAGGTCGACTACCGGCRNG   | + | 5 | 2 | 5 | 0.00 | 2.50 |
| Chr8:93717635-93717657   | 3 | RNA | GGCCGAGGTCGACTACCGGCRNG   | GGCCGAG-CAggaAGcCaAG      | - | 5 | 2 | 5 | 0.00 | 2.50 |
| Chr2:30605462-30605484   | 3 | RNA | GGCCGAGGTCGACTACCGGCRNG   | GggaAGGTCaCgAG-GGcGG      | + | 5 | 2 | 5 | 0.00 | 2.50 |
| Chr4:211794527-211794549 | 5 | X   | GGCCGAGGTCGACTACCGGCRNG   | GGCCGAGGTCGAGTcGgGcGAG    | - | 5 | 0 | 5 | 0.00 | 2.50 |
| Chr9:52942755-52942777   | 5 | RNA | GGCCGAGGTCGACTACCGGCRNG   | G-aCGGgTTCAGcAGcGgG       | - | 5 | 1 | 5 | 0.00 | 2.50 |
| Chr9:88453297-88453319   | 3 | RNA | GGCCGAGGTCGACTACCGGCRNG   | GG-AGAGTCACTAGcTgAGG      | + | 5 | 2 | 5 | 0.00 | 2.50 |
| Chr5:3147718-3147720     | 5 | RNA | GGCCGAGGTCGACTACCGGCRNG   | GGCCaAa-CAcCaactCGCTGG    | - | 5 | 2 | 5 | 0.00 | 2.50 |
| Chr4:239488684-239488706 | 3 | RNA | GGCCGAGGTCGACTACCGGCRNG   | GGCCGAGGTCGACT-CCGCGGG    | + | 3 | 2 | 5 | 0.00 | 2.50 |
| Chr2:72470288-72470310   | 3 | RNA | GGCCGAGGTCGACTACCGGCRNG   | GaCCaAa-CAcAGcCCGCGAG     | + | 3 | 2 | 5 | 0.00 | 2.50 |
| Chr1:26259085-26259107   | 3 | RNA | GGCCGAGGTCGACTACCGGCRNG   | GGCCGCTcGc-CgGCGCGAG      | + | 5 | 1 | 5 | 0.00 | 2.50 |
| Chr10:67750513-67750535  | 5 | RNA | GGCCGAGGTCGACTACCGGCRNG   | GTCaAGGTCGACT-CAcCaAG     | + | 5 | 1 | 5 | 0.00 | 2.50 |
| Chr2:53062851-53062873   | 5 | DNA | GGCCGAGGTCGACTACCGGCRNG   | ctCCaAGTTCaCaCACTCCGCGAGG | - | 4 | 2 | 5 | 0.00 | 2.50 |
| Chr9:7013318-7013340     | 5 | DNA | GGCCGAGGTCGACTACCGGCRNG   | GTCrGcGAGcGCTCCGCGCTGG    | - | 5 | 1 | 5 | 0.00 | 2.50 |
| Chr9:82081647-82081669   | 5 | DNA | GGCCGAGGTCGACTACCGGCRNG   | ctGcGAGGTCAGaactCCGCGGAG  | - | 5 | 1 | 5 | 0.00 | 2.50 |
| Chr5:151398762-151398784 | 3 | RNA | GGCCGAGGTCGACTACCGGCRNG   | Gg-AGaTgAaCTCCGAGG        | + | 5 | 2 | 5 | 0.00 | 2.50 |
| Chr1:304742668-304742690 | 3 | RNA | GGCCGAGGTCGACTACCGGCRNG   | agCCCGg-agaAaCTCCGCGG     | + | 5 | 2 | 5 | 0.00 | 2.50 |
| Chr2:17907161-17907183   | 3 | DNA | GGCCGAGGTCGACTACCGGCRNG   | ctCCAGGTCGCaCACTCCGCGAGG  | + | 5 | 2 | 5 | 0.00 | 2.50 |
| Chr1:92062580-92062602   | 3 | RNA | GGCCGAGGTCGACTACCGGCRNG   | GTCtTgCT-GaCCaCCGCGAG     | - | 5 | 1 | 5 | 0.00 | 2.50 |
| Chr2:133229184-133229206 | 3 | RNA | GGCCGAGGTCGACTACCGGCRNG   | G-CAAGGTCGCTACCGCGGG      | + | 3 | 2 | 5 | 0.00 | 2.50 |
| Chr4:44510781-44510803   | 3 | RNA | GGCCGAGGTCGACTACCGGCRNG   | cCCCGAGTtAGAGT-AGAGG      | + | 4 | 2 | 5 | 0.00 | 2.50 |
| Chr8:114282077-114282099 | 5 | DNA | GGCCGAGGTCGACTACCGGCRNG   | ITCGcAGGTCGACT-CAcCaAG    | + | 5 | 1 | 5 | 0.00 | 2.50 |
| Chr1:28292439-28292461   | 3 | RNA | GGCCGAGGTCGACTACCGGCRNG   | GGCCaAGcGc-agaCCGCGGG     | + | 5 | 2 | 5 | 0.00 | 2.50 |
| Chr7:182231025-182231047 | 3 | RNA | GGCCGAGGTCGACTACCGGCRNG   | GGC-ITGGGACTACCGGCTGG     | + | 4 | 2 | 5 | 0.00 | 2.50 |
| Chr2:5869796-5869818     | 5 | RNA | GGCCGAGGTCGACTACCGGCRNG   | Gg-AGaTgAaCTCCGAGG        | - | 5 | 2 | 5 | 0.00 | 2.50 |
| Chr8:25629545-25629567   | 3 | RNA | GGCCGAGGTCGACTACCGGCRNG   | G-aCGGgTTCAGcAGcGgG       | + | 5 | 1 | 5 | 0.00 | 2.50 |
| Chr7:146414653-146414675 | 3 | RNA | GGCCGAGGTCGACTACCGGCRNG   | GgGAGaAGTCAGTTC-ogTGG     | + | 5 | 2 | 5 | 0.00 | 2.50 |
| Chr3:138783219-138783241 | 3 | RNA | GGCCGAGGTCGACTACCGGCRNG   | GGC-ITGGGACTACCGGCTGG     | + | 5 | 2 | 5 | 0.00 | 2.50 |
| Chr3:128477406-128477428 | 5 | RNA | GGCCGAGGTCGACTACCGGCRNG   | ITG-AGGcGTCAGCaCaGCTAG    | - | 5 | 2 | 5 | 0.00 | 2.50 |
| Chr5:165674116-165674138 | 5 | RNA | GGCCGAGGTCGACTACCGGCRNG   | G-aCGGgTTCAGcAGcGgG       | - | 5 | 1 | 5 | 0.00 | 2.50 |
| Chr2:221870198-221870220 | 3 | RNA | GGCCGAGGTCGACTACCGGCRNG   | GgGcAGGTCGAGcAGc-aCGG     | + | 4 | 2 | 5 | 0.00 | 2.50 |
| Chr1:151859796-151859818 | 3 | RNA | GGCCGAGGTCGACTACCGGCRNG   | GGC-ITGGGACTACCGGCTGG     | + | 5 | 1 | 5 | 0.00 | 2.50 |
| Chr1:139517907-139517929 | 3 | RNA | GGCCGAGGTCGACTACCGGCRNG   | Gg-ITGTCGCaCaCaCGAGG      | + | 5 | 2 | 5 | 0.00 | 2.50 |
| Chr8:171457896-171457918 | 5 | RNA | GGCCGAGGTCGACTACCGGCRNG   | GGcGAGGTCG-ITgGcaAG       | - | 5 | 2 | 5 | 0.00 | 2.50 |
| Chr2:131249967-131249989 | 5 | DNA | GGCCGAGGTCGACTACCGGCRNG   | ctGCaAGcGcCaCAACTCCGCGAGG | - | 5 | 2 | 5 | 0.00 | 2.50 |
| Chr5:77159066-77159088   | 3 | RNA | GGCCGAGGTCGACTACCGGCRNG   | G-aCGGgTTCAGcAGcGgG       | + | 5 | 1 | 5 | 0.00 | 2.50 |
| Chr10:266540-266562      | 3 | DNA | GGCCGAGGTCGACTACCGGCRNG   | ctCTCGAGTTCGcCaCaCGCGAG   | + | 5 | 1 | 5 | 0.00 | 2.50 |
| Chr4:43887934-43887956   | 5 | RNA | GGCCGAGGTCGACTACCGGCRNG   | G-aCGGgTTCAGcAGcGgG       | - | 5 | 1 | 5 | 0.00 | 2.50 |
| Chr2:88096193-88096215   | 5 | X   | GGCCGAGGTCGACTACCGGCRNG   | GgaAGGTCGcCTAGCGGCTGG     | - | 5 | 0 | 5 | 0.00 | 2.50 |
| Chr6:19224183-19224205   | 5 | RNA | GGCCGAGGTCGACTACCGGCRNG   | GGC-ITGGGACTACCGGCTGG     | - | 4 | 2 | 5 | 0.00 | 2.50 |
| Chr3:15524289-15524311   | 5 | RNA | GGCCGAGGTCGACTACCGGCRNG   | GcCaAGGTCGACTACCGGCTGG    | - | 5 | 2 | 5 | 0.00 | 2.50 |
| Chr2:28078546-28078568   | 3 | RNA | GGCCGAGGTCGACTACCGGCRNG   | ITCGcAGGTCGACT-AGgAGCGGAG | + | 5 | 1 | 5 | 0.00 | 2.50 |
| Chr7:79915664-79915686   | 5 | RNA | GGCCGAGGTCGACTACCGGCRNG   | GCCaAGG-CACTGCTGCGCGG     | + | 5 | 1 | 5 | 0.00 | 2.50 |
| Chr7:74928865-74928887   | 5 | RNA | GGCCGAGGTCGACTACCGGCRNG   | GcGcAGGTCIACtTgCTG-CCGG   | - | 5 | 1 | 5 | 0.00 | 2.50 |
| Chr8:170611572-170611594 | 3 | RNA | GGCCGAGGTCGACTACCGGCRNG   | GGCCGAGGTCGCT-CgGCTGG     | + | 4 | 1 | 5 | 0.00 | 2.50 |
| Chr7:163533997-163534019 | 3 | RNA | GGCCGAGGTCGACTACCGGCRNG   | GGCCAG-CAcAGcGcGAGG       | + | 5 | 2 | 5 | 0.00 | 2.50 |
| Chr7:119842350-119842372 | 3 | DNA | GGCCGAGGTCGACTACCGGCRNG   | GgGcAGGTCGCaATgGAGCAGG    | + | 5 | 1 | 5 | 0.00 | 2.50 |
| Chr2:66148672-66148694   | 3 | RNA | GGCCGAGGTCGACTACCGGCRNG   | GGCCCa-TCGtCaCgGCGAG      | + | 5 | 2 | 5 | 0.00 | 2.50 |
| Chr2:22445536-22445558   | 3 | RNA | GGCCGAGGTCGACTACCGGCRNG   | G-CTcGgGTCAGTACCGCGAGG    | + | 5 | 1 | 5 | 0.00 | 2.50 |
| Chr4:53984293-53984315   | 3 | RNA | GGCCGAGGTCGACTACCGGCRNG   | GGCCGAGGTCGAGcCaGcGCGG    | + | 4 | 1 | 5 | 0.00 | 2.50 |
| Chr4:12529706-12529728   | 3 | DNA | GGCCGAGGTCGACTACCGGCRNG   | GGCTCTGgGTCaCaCCCGGCGGG   | + | 5 | 2 | 5 | 0.00 | 2.50 |
| Chr9:3647800-3647802     | 5 | RNA | GGCCGAGGTCGACTACCGGCRNG   | GGCCGAGGTCGACTACCGGCRNG   | + | 5 | 2 | 5 | 0.00 | 2.50 |
| Chr8:7139077-7139099     | 3 | RNA | GGCCGAGGTCGACTACCGGCRNG   | GTCcC-ITgGgTTCAGGCaAG     | + | 5 | 2 | 5 | 0.00 | 2.50 |
| Chr6:45157195-45157217   | 3 | RNA | GGCCGAGGTCGACTACCGGCRNG   | GcCaAaGTCaACT-CAAG        | + | 5 | 2 | 5 | 0.00 | 2.50 |
| Chr7:106275519-106275541 | 5 | RNA | GGCCGAGGTCGACTACCGGCRNG   | eCCAGcCTCGA-TACtCGtGG     | - | 5 | 2 | 5 | 0.00 | 2.50 |
| Chr5:136248185-136248207 | 5 | RNA | GGCCGAGGTCGACTACCGGCRNG   | GCGctaaTTCAGCT-CCGCGAG    | - | 5 | 1 | 5 | 0.00 | 2.50 |
| Chr4:160494645-160494667 | 5 | DNA | GGCCGAGGTCGACTACCGGCRNG   | ctCCaAGcGcCaCACTCCGCGAGG  | - | 5 | 2 | 5 | 0.00 | 2.50 |
| Chr4:156124844-156124866 | 5 | RNA | GGCCGAGGTCGACTACCGGCRNG   | GaGAGcAGTTCGAC-CCGAGG     | + | 5 | 2 | 5 | 0.00 | 2.50 |
| Chr10:36509790-36509812  | 5 | RNA | GGCCGAGGTCGACTACCGGCRNG   | GGC-AGGcGcCaCAGcGAG       | - | 5 | 1 | 5 | 0.00 | 2.50 |
| Chr10:78995573-78995595  | 5 | RNA | GGCCGAGGTCGACTACCGGCRNG   | GGC-AGAGTTCAGcAGcGAG      | - | 4 | 1 | 5 | 0.00 | 2.50 |
| Chr5:36540877-36540899   | 3 | RNA | GGCCGAGGTCGACTACCGGCRNG   | ITG-AGAGGTCAGcAGcCTCGCTGG | + | 5 | 2 | 5 | 0.00 | 2.50 |
| Chr6:4719614-4719636     | 3 | RNA | GGCCGAGGTCGACTACCGGCRNG   | GGCCGAGGTCGACTACCGGCRNG   | + | 5 | 2 | 5 | 0.00 | 2.50 |
| Chr7:77796091-77796113   | 3 | DNA | GGCCGAGGTCGACTACCGGCRNG   | GGCCcAGcGcGAGTACGCGAGG    | + | 5 | 1 | 5 | 0.00 | 2.50 |
| Chr3:96386434-96386456   | 3 | RNA | GGCCGAGGTCGACTACCGGCRNG   | GTCrGAGGTCaCT-CCGCTGG     | + | 4 | 2 | 5 | 0.00 | 2.50 |
| Chr4:67320914-67320936   | 5 | RNA | GGCCGAGGTCGACTACCGGCRNG   | GGCCGAGTcAGCTG-GGCTAG     | + | 4 | 2 | 5 | 0.00 | 2.50 |
| Chr1:109314742-109314764 | 5 | RNA | GGCCGAGGTCGACTACCGGCRNG   | GGCCAGAGcAGcCT-CgGCTGG    | - | 4 | 1 | 5 | 0.00 | 2.50 |
| Chr8:54564954-54564976   | 3 | DNA | GGCCGAGGTCGACTACCGGCRNG   | GaCaTAGGTCGAGcCaCaCGGCGG  | + | 5 | 1 | 5 | 0.00 | 2.50 |
| Chr8:127697101-127697123 | 3 | RNA | GGCCGAGGTCGACTACCGGCRNG   | G-aCGGgTTCAGcAGcGgG       | + | 5 | 2 | 5 | 0.00 | 2.50 |
| Chr5:192640023-192640045 | 5 | RNA | GGCCGAGGTCGACTACCGGCRNG   | agCC-ITGGGACTACCGGCTGG    | - | 5 | 2 | 5 | 0.00 | 2.50 |
| Chr4:93186487-93186509   | 3 | RNA | GGCCGAGGTCGACTACCGGCRNG   | agCCCGGTCGcGcG-AGCTAG     | - | 5 | 2 | 5 | 0.00 | 2.50 |
| Chr8:65248729-65248751   | 3 | RNA | GGCCGAGGTCGACTACCGGCRNG   | GgaCAGaATg-ITGCGCGGG      | + | 5 | 2 | 5 | 0.00 | 2.50 |
| Chr7:6842897-6842899     | 5 | RNA | GGCCGAGGTCGACTACCGGCRNG   | GG-AGGTCAGcAGcGgG         | + | 5 | 2 | 5 | 0.00 | 2.50 |
| Chr2:118505663-118505685 | 3 | RNA | GGCCGAGGTCGACTACCGGCRNG   | GggGAGGTCG-ITgAGGCTGG     | + | 5 | 2 | 5 | 0.00 | 2.50 |
| Chr8:5110933-5110955     | 5 | DNA | GGCCGAGGTCGACTACCGGCRNG   | ITCTCAGGTCGCaCACTCCGCGAGG | - | 5 | 2 | 5 | 0.00 | 2.50 |
| Chr10:48124588-48124610  | 3 | DNA | GGCCGAGGTCGACTACCGGCRNG   | GGCTCTGgGcTcAGcCaCCGCGGG  | + | 5 | 2 | 5 | 0.00 | 2.50 |
| Chr5:158087904-158087926 | 5 | RNA | GGCCGAGGTCGACTACCGGCRNG   | GaGagGcGAGCT-CCGCGAG      | - | 5 | 1 | 5 | 0.00 | 2.50 |
| Chr3:44342876-44342898   | 3 | RNA | GGCCGAGGTCGACTACCGGCRNG   | GgGcCGGT-GACTGCTGCGCGG    | - | 5 | 1 | 5 | 0.00 | 2.50 |
| Chr3:31201635-31201657   | 3 | RNA | GGCCGAGGTCGACTACCGGCRNG   | ITCCcAGG-AGcAGTgGCAAG     | + | 5 | 2 | 5 | 0.00 | 2.50 |
| Chr1:15490356-15490378   | 3 | RNA | GGCCGAGGTCGACTACCGGCRNG   | GaTCG-GTTCGAGcAGcGCGGG    | + | 5 | 1 | 5 | 0.00 | 2.50 |
|                          |   |     |                           |                           |   |   |   |   |      |      |

|                          |   |     |                         |                           |                     |   |   |   |      |      |      |
|--------------------------|---|-----|-------------------------|---------------------------|---------------------|---|---|---|------|------|------|
| Chr9:104833430-104833452 | 4 | 3   | RNA                     | GGCCGAGGTGCACTACCGGNNRG   | aGCCG-gcGACaACCaGAG | - | 5 | 2 | 0    | 4.96 | 2.48 |
| Chr10:78339100-78339122  | 2 | RNA | GGCCGAGGTGCACTACCGGNNRG | GcGcAGGTGG-TGcCGCAAG      | -                   | 5 | 2 | 0 | 4.96 | 2.48 |      |
| Chr3:67721785-67721807   | 3 | RNA | GGCCGAGGTGCACTACCGGNNRG | GGCCGAGGTGCACTACCGCACT    | -                   | 3 | 2 | 0 | 4.96 | 2.48 |      |
| Chr1:179482810-179482832 | 3 | DNA | GGCCGAGGTGCACTACCGGNNRG | GGaCGAGTTCGcGgCGCGCGTGG   | +                   | 5 | 2 | 0 | 4.96 | 2.48 |      |
| Chr5:155583529-155583551 | 2 | RNA | GGCCGAGGTGCACTACCGGNNRG | GbaCAGGTTC-TccCaGTGG      | +                   | 5 | 2 | 0 | 4.96 | 2.48 |      |
| Chr2:10991218-10991240   | 4 | RNA | GGCCGAGGTGCACTACCGGNNRG | cg-GAGGAGTACTACCGTGG      | +                   | 5 | 2 | 0 | 4.96 | 2.48 |      |
| Chr4:7064764-7064786     | 4 | RNA | GGCCGAGGTGCACTACCGGNNRG | GbaCAGGTTC-TccCaGTGG      | -                   | 5 | 2 | 0 | 4.96 | 2.48 |      |
| Chr7:26041820-26041842   | 4 | RNA | GGCCGAGGTGCACTACCGGNNRG | GGcGAGGTGG-TGcGbaAGG      | +                   | 5 | 2 | 0 | 4.96 | 2.48 |      |
| Chr9:14540222-14540244   | 3 | RNA | GGCCGAGGTGCACTACCGGNNRG | GgCGGTGatGcC-CGGCGAG      | -                   | 5 | 2 | 0 | 4.96 | 2.48 |      |
| Chr1:167309177-167309199 | 5 | RNA | GGCCGAGGTGCACTACCGGNNRG | acCGATGTGG-TAGaGCTAG      | +                   | 5 | 2 | 0 | 4.96 | 2.48 |      |
| Chr5:193726588-193726610 | 5 | RNA | GGCCGAGGTGCACTACCGGNNRG | GGcCAAGTTCGg-TcGtGCAAG    | -                   | 4 | 1 | 0 | 4.96 | 2.48 |      |
| Chr1:147651919-147651941 | 4 | DNA | GGCCGAGGTGCACTACCGGNNRG | GGcGAGGTTCGtTCgCaAGGCGCAG | -                   | 4 | 2 | 0 | 4.96 | 2.48 |      |
| Chr4:239022854-239022876 | 5 | RNA | GGCCGAGGTGCACTACCGGNNRG | GcCGAGTcGcAAC-CGGCAAG     | -                   | 5 | 2 | 0 | 4.96 | 2.48 |      |
| Chr4:206793171-206793193 | 5 | RNA | GGCCGAGGTGCACTACCGGNNRG | GGCCG-gcCAACTCCGCGAG      | +                   | 5 | 2 | 0 | 4.96 | 2.48 |      |
| Chr2:162983071-162983093 | 3 | RNA | GGCCGAGGTGCACTACCGGNNRG | GGTCGAGTTC-ACaTAgCaGG     | -                   | 5 | 1 | 0 | 4.96 | 2.48 |      |
| Chr8:96802599-96802621   | 4 | RNA | GGCCGAGGTGCACTACCGGNNRG | GGcCGAG-TcGCaGgAGGCGGG    | +                   | 4 | 1 | 0 | 4.96 | 2.48 |      |
| Chr2:134103104-134103126 | 3 | RNA | GGCCGAGGTGCACTACCGGNNRG | GGcCGAGCGcGagAa-GGGCGG    | +                   | 3 | 1 | 0 | 4.96 | 2.48 |      |
| Chr6:65982269-65982291   | 5 | RNA | GGCCGAGGTGCACTACCGGNNRG | agC-AGGTGCAgTaaGGCGCG     | +                   | 5 | 2 | 0 | 4.96 | 2.48 |      |
| Chr6:108385885-108385907 | 5 | RNA | GGCCGAGGTGCACTACCGGNNRG | GgCGAG-TcCAcCaCCaCTAG     | +                   | 5 | 2 | 0 | 4.96 | 2.48 |      |
| Chr10:7156174-7156196    | 5 | RNA | GGCCGAGGTGCACTACCGGNNRG | GGCGCAaTcccTccc-CTGG      | -                   | 5 | 2 | 0 | 4.96 | 2.48 |      |
| Chr4:107995249-107995271 | 3 | RNA | GGCCGAGGTGCACTACCGGNNRG | GGC-AGcTgAGTgTgCGCGAG     | -                   | 4 | 1 | 0 | 4.96 | 2.48 |      |
| Chr2:49221166-49221188   | 3 | DNA | GGCCGAGGTGCACTACCGGNNRG | GTCGAGGAGcGtCTCCGGTGG     | +                   | 4 | 1 | 0 | 4.96 | 2.48 |      |
| Chr9:16620561-16620583   | 3 | RNA | GGCCGAGGTGCACTACCGGNNRG | G-CTaGTCGgAgACCGTGG       | +                   | 5 | 2 | 0 | 4.96 | 2.48 |      |
| Chr5:96941919-96941941   | 4 | RNA | GGCCGAGGTGCACTACCGGNNRG | G-cGgGTCGCaCaGgAGCGGG     | +                   | 5 | 1 | 0 | 4.96 | 2.48 |      |
| Chr6:145848412-145848434 | 4 | RNA | GGCCGAGGTGCACTACCGGNNRG | GGTCGAGTTCG-CaCbaGAG      | -                   | 5 | 1 | 0 | 4.96 | 2.48 |      |
| Chr7:133210223-133210245 | 2 | RNA | GGCCGAGGTGCACTACCGGNNRG | cgCGAGGc-GAgGCGCGAG       | +                   | 5 | 2 | 0 | 4.96 | 2.48 |      |
| Chr4:14282192-14282214   | 4 | X   | GGCCGAGGTGCACTACCGGNNRG | GgCGAGTTCAGaAcGgCGCGG     | +                   | 5 | 0 | 0 | 4.96 | 2.48 |      |
| Chr8:22412025-22412047   | 2 | RNA | GGCCGAGGTGCACTACCGGNNRG | GGTGCGCGCaCccCGCGCGG      | +                   | 5 | 1 | 0 | 4.96 | 2.48 |      |
| Chr4:208161430-208161452 | 4 | RNA | GGCCGAGGTGCACTACCGGNNRG | GgAGGAGGCACT-CatCAAG      | -                   | 5 | 2 | 0 | 4.96 | 2.48 |      |
| Chr6:62578280-62578302   | 3 | RNA | GGCCGAGGTGCACTACCGGNNRG | agC-AGaTCACTaaGGCCGG      | +                   | 5 | 2 | 0 | 4.96 | 2.48 |      |
| Chr3:83892362-83892384   | 3 | RNA | GGCCGAGGTGCACTACCGGNNRG | Gg-GaATCaTACCgGCTAG       | +                   | 5 | 2 | 0 | 4.96 | 2.48 |      |
| Chr10:99222241-99222263  | 5 | RNA | GGCCGAGGTGCACTACCGGNNRG | GGcAAGTACTACAGGCGAG       | -                   | 5 | 1 | 0 | 4.96 | 2.48 |      |
| Chr2:75002590-75002612   | 4 | DNA | GGCCGAGGTGCACTACCGGNNRG | agCGAGGCGcGCaACCGCGGAG    | +                   | 5 | 1 | 0 | 4.96 | 2.48 |      |
| Chr7:43788995-43789017   | 3 | RNA | GGCCGAGGTGCACTACCGGNNRG | tgCGGcGTCgCT-CGgGCTG      | +                   | 5 | 2 | 0 | 4.96 | 2.48 |      |
| Chr2:111869271-111869293 | 2 | RNA | GGCCGAGGTGCACTACCGGNNRG | GGCCcGcT-AGTACTGgGAG      | +                   | 5 | 1 | 0 | 4.96 | 2.48 |      |
| Chr2:216523951-216523973 | 4 | RNA | GGCCGAGGTGCACTACCGGNNRG | GGCC-GHGAGTACTACCGCTGG    | +                   | 4 | 1 | 0 | 4.96 | 2.48 |      |
| Chr1:118097494-118097516 | 5 | RNA | GGCCGAGGTGCACTACCGGNNRG | GTCGTCGTCAGC-AGgGCTGG     | +                   | 5 | 1 | 0 | 4.96 | 2.48 |      |
| Chr2:182683714-182683936 | 4 | DNA | GGCCGAGGTGCACTACCGGNNRG | agCGAacGgCGACTgCaAGGCGGG  | +                   | 5 | 2 | 0 | 4.96 | 2.48 |      |
| Chr4:18892791-18892813   | 3 | RNA | GGCCGAGGTGCACTACCGGNNRG | G-CCGATTCaACCaCCGCGAG     | -                   | 5 | 1 | 0 | 4.96 | 2.48 |      |
| Chr8:14811737-14811759   | 4 | RNA | GGCCGAGGTGCACTACCGGNNRG | G-CCAGaGTAcCaCCGCTGG      | +                   | 5 | 1 | 0 | 4.96 | 2.48 |      |
| Chr8:34557825-34557847   | 3 | RNA | GGCCGAGGTGCACTACCGGNNRG | cgCGcGcCT-CTcCGTCAAG      | +                   | 5 | 2 | 0 | 4.96 | 2.48 |      |
| Chr2:1399700-1399722     | 4 | DNA | GGCCGAGGTGCACTACCGGNNRG | GcCGAGGTGCTgTACCCTGGG     | +                   | 5 | 2 | 0 | 4.96 | 2.48 |      |
| Chr7:134261506-134261528 | 4 | RNA | GGCCGAGGTGCACTACCGGNNRG | GGcCGAGa-CatCTCCGCTGG     | +                   | 5 | 1 | 0 | 4.96 | 2.48 |      |
| Chr10:18704782-18704804  | 5 | RNA | GGCCGAGGTGCACTACCGGNNRG | GTCGAGGTgACTAC-GgGATG     | -                   | 5 | 1 | 0 | 4.96 | 2.48 |      |
| Chr10:89301823-89301845  | 2 | RNA | GGCCGAGGTGCACTACCGGNNRG | GgAGGAGgGAGT-CGgaCGG      | +                   | 5 | 2 | 0 | 4.96 | 2.48 |      |
| Chr8:4299715-4299717     | 4 | RNA | GGCCGAGGTGCACTACCGGNNRG | GgCGAGGc-GAgGCGCGAG       | +                   | 5 | 2 | 0 | 4.96 | 2.48 |      |
| Chr8:7352361-7352383     | 3 | RNA | GGCCGAGGTGCACTACCGGNNRG | YGCCGTCGTCGcGg-CGGCGGG    | +                   | 4 | 2 | 0 | 4.96 | 2.48 |      |
| Chr2:666036-666058       | 4 | RNA | GGCCGAGGTGCACTACCGGNNRG | tcAaCACTcCT-CCGgAAG       | +                   | 4 | 2 | 0 | 4.96 | 2.48 |      |
| Chr9:117044286-117044308 | 3 | RNA | GGCCGAGGTGCACTACCGGNNRG | GcCCAGccCGaGT-CGgHGCG     | -                   | 4 | 2 | 0 | 4.96 | 2.48 |      |
| Chr2:98435223-98435245   | 3 | DNA | GGCCGAGGTGCACTACCGGNNRG | GcCCAGaCaCaCaCCaTGGCAG    | +                   | 5 | 2 | 0 | 4.96 | 2.48 |      |
| Chr2:103423915-103423937 | 2 | RNA | GGCCGAGGTGCACTACCGGNNRG | GGCaAaG-CACTcGgCGCCAG     | +                   | 4 | 2 | 0 | 4.96 | 2.48 |      |
| Chr3:131973043-131973065 | 5 | RNA | GGCCGAGGTGCACTACCGGNNRG | GgBaAAGTCACTAgCCGCTGG     | +                   | 4 | 2 | 0 | 4.96 | 2.48 |      |
| Chr6:152415481-152415503 | 2 | RNA | GGCCGAGGTGCACTACCGGNNRG | GaTAgG-aGCaACCGCGGAG      | +                   | 5 | 2 | 0 | 4.96 | 2.48 |      |
| Chr8:109840741-109840763 | 5 | RNA | GGCCGAGGTGCACTACCGGNNRG | GgTCG-GcCGCaACCGCGGAG     | +                   | 5 | 1 | 0 | 4.96 | 2.48 |      |
| Chr6:11350926-11350948   | 2 | RNA | GGCCGAGGTGCACTACCGGNNRG | GCGCaAgGcGcCT-CGgCGAG     | -                   | 4 | 1 | 0 | 4.96 | 2.48 |      |
| Chr4:6551562-65515644    | 4 | RNA | GGCCGAGGTGCACTACCGGNNRG | GCG-HHGAGTACTACCGCTGG     | +                   | 4 | 2 | 0 | 4.96 | 2.48 |      |
| Chr1:153168105-153168127 | 4 | RNA | GGCCGAGGTGCACTACCGGNNRG | GCG-GGcCAcCaCCcCGCGGG     | +                   | 4 | 2 | 0 | 4.96 | 2.48 |      |
| Chr3:179124793-179124815 | 3 | RNA | GGCCGAGGTGCACTACCGGNNRG | GCG-HtGCGACTACCGCTGG      | +                   | 4 | 2 | 0 | 4.96 | 2.48 |      |
| Chr1:304148669-304148691 | 5 | RNA | GGCCGAGGTGCACTACCGGNNRG | GTCtGgTGT-GaCaACCGCGAG    | +                   | 5 | 1 | 0 | 4.96 | 2.48 |      |
| Chr2:149089809-149089831 | 4 | RNA | GGCCGAGGTGCACTACCGGNNRG | GCG-AGGcCAcCTCCGCGGG      | +                   | 4 | 2 | 0 | 4.96 | 2.48 |      |
| Chr8:74798064-74798086   | 3 | RNA | GGCCGAGGTGCACTACCGGNNRG | GTCtGgGtGgT-acCGGgAAG     | +                   | 5 | 2 | 0 | 4.96 | 2.48 |      |
| Chr8:70236156-70236178   | 4 | RNA | GGCCGAGGTGCACTACCGGNNRG | a-CCGAGTTCAGctGgCGGAG     | +                   | 5 | 1 | 0 | 4.96 | 2.48 |      |
| Chr2:85574295-85574317   | 5 | RNA | GGCCGAGGTGCACTACCGGNNRG | G-cAGAGTTCAGcAgCGCGGG     | +                   | 4 | 1 | 0 | 4.96 | 2.48 |      |
| Chr7:34662937-34662959   | 3 | RNA | GGCCGAGGTGCACTACCGGNNRG | GCG-HtGCaAGTACTACCGCTGG   | +                   | 4 | 2 | 0 | 4.96 | 2.48 |      |
| Chr4:106462938-106462960 | 4 | DNA | GGCCGAGGTGCACTACCGGNNRG | agCTAAGTTCGCaAaCaGCTAG    | +                   | 5 | 1 | 0 | 4.96 | 2.48 |      |
| Chr1:53396316-53396338   | 3 | RNA | GGCCGAGGTGCACTACCGGNNRG | GCGCGAGGcGAGcAgGCGCTGG    | +                   | 4 | 2 | 0 | 4.96 | 2.48 |      |
| Chr7:180147340-180147362 | 4 | RNA | GGCCGAGGTGCACTACCGGNNRG | G-CCAGAGgAGgAGcCGGCTGG    | +                   | 4 | 1 | 0 | 4.96 | 2.48 |      |
| Chr4:145616709-145616731 | 5 | RNA | GGCCGAGGTGCACTACCGGNNRG | GgGTCAGGcGgC-g-AGCTGgAGG  | +                   | 5 | 2 | 0 | 4.96 | 2.48 |      |
| Chr5:116752231-116752253 | 3 | RNA | GGCCGAGGTGCACTACCGGNNRG | GcCCAGGgGCaCaCCc-gTGG     | -                   | 5 | 2 | 0 | 4.96 | 2.48 |      |
| Chr2:63483043-63483065   | 4 | RNA | GGCCGAGGTGCACTACCGGNNRG | GtGTCG-GCaCaCCGCGAGG      | -                   | 5 | 2 | 0 | 4.96 | 2.48 |      |
| Chr9:143141983-143142005 | 3 | RNA | GGCCGAGGTGCACTACCGGNNRG | GCGCaAGTtAgg-gCGCGGG      | -                   | 5 | 2 | 0 | 4.96 | 2.48 |      |
| Chr5:95635826-95635848   | 3 | RNA | GGCCGAGGTGCACTACCGGNNRG | GGCT-GGTCACTgTgCGCTGG     | +                   | 5 | 1 | 0 | 4.96 | 2.48 |      |
| Chr1:205664183-205664205 | 3 | DNA | GGCCGAGGTGCACTACCGGNNRG | GTCGTAAGGAGcGtCTCCGGTGG   | +                   | 4 | 1 | 0 | 4.96 | 2.48 |      |
| Chr3:16510324-16510346   | 2 | RNA | GGCCGAGGTGCACTACCGGNNRG | GGC-GAGGTCtctCTCCGCCAG    | +                   | 5 | 1 | 0 | 4.96 | 2.48 |      |
| Chr8:110049406-110049428 | 2 | RNA | GGCCGAGGTGCACTACCGGNNRG | tGaaAGTTCGACTCAg-CAGG     | -                   | 5 | 1 | 0 | 4.96 | 2.48 |      |
| Chr7:124425503-124425525 | 5 | RNA | GGCCGAGGTGCACTACCGGNNRG | HGCGAGTTCACTACCGCTGG      | +                   | 5 | 1 | 0 | 4.96 | 2.48 |      |
| Chr6:45977536-45977558   | 5 | RNA | GGCCGAGGTGCACTACCGGNNRG | agCGAAGC-CGAGTCCGCGAG     | +                   | 5 | 2 | 0 | 4.96 | 2.48 |      |
| Chr5:206529952-206529974 | 3 | RNA | GGCCGAGGTGCACTACCGGNNRG | GgCGGTGatGcC-CCGCGAG      | +                   | 5 | 2 | 0 | 4.96 | 2.48 |      |
| Chr1:94666673-94666695   | 3 | RNA | GGCCGAGGTGCACTACCGGNNRG | GCG-AGGcGtGcACCGCGGG      | -                   | 4 | 2 | 0 | 4.96 | 2.48 |      |
| Chr6:127441781-127441803 | 3 | RNA | GGCCGAGGTGCACTACCGGNNRG | GgCaAGG-GaCaACCTCGGG      | +                   | 4 | 2 | 0 | 4.96 | 2.48 |      |
| Chr2:164236196-164236218 | 5 | RNA | GGCCGAGGTGCACTACCGGNNRG | GaCC-GGTGTCtCACTGCGGG     | +                   | 4 | 1 | 0 | 4.96 | 2.48 |      |
| Chr1:149384055-149384077 | 5 | RNA | GGCCGAGGTGCACTACCGGNNRG | GgGCGAGGcGg-g-ACCTGgAGG   | +                   | 5 | 2 | 0 | 4.96 | 2.48 |      |
| Chr1:137801723-137801745 | 5 | RNA | GGCCGAGGTGCACTACCGGNNRG | GTCGtGT-T-ACCaCGGCaAG     | +                   | 5 | 2 | 0 | 4.96 | 2.48 |      |
| Chr8:151879708-151879730 | 2 | RNA | GGCCGAGGTGCACTACCGGNNRG | TG-GAGGgATgAGTgCGGAG      | +                   | 5 | 2 | 0 | 4.96 | 2.48 |      |
| Chr4:1517855-1517877     | 4 | RNA | GGCCGAGGTGCACTACCGGNNRG | tg-GAGGTCAGcACTCGCTGG     | +                   | 5 | 2 | 0 | 4.96 | 2.48 |      |
| Chr1:263810281-263810303 | 2 | RNA | GGCCGAGGTGCACTACCGGNNRG | GCGCGAGGcGAGcAGGAGGAG     | +                   | 5 | 1 | 0 | 4.96 | 2.48 |      |
| Chr9:21156229-21156251   | 4 | RNA | GGCCGAGGTGCACTACCGGNNRG | g-cGgGTCGCaCaAgGCGGG      | +                   | 5 | 1 | 0 | 4.96 | 2.48 |      |
| Chr7:31825811-31825833   | 5 | RNA | GGCCGAGGTGCACTACCGGNNRG | GgATgGTCGcG-g-cCGCGGG     | +                   | 5 | 1 | 0 | 4.96 | 2.48 |      |
| Chr7:165795458-165795480 | 2 | RNA | GGCCGAGGTGCACTACCGGNNRG | GcCGGTG-gGcTgTCGCGAG      | +                   | 5 | 2 | 0 | 4.96 | 2.48 |      |
| Chr5:33545793-33545815   | 5 | RNA | GGCCGAGGTGCACTACCGGNNRG | TgGtC-ctGTGACTACCGCTGG    | +                   | 5 | 1 | 0 | 4.96 | 2.48 |      |
| Chr9:74121535-74121557   | 2 | RNA | GGCCGAGGTGCACTACCGGNNRG | GCGaGtGT-ActCGtGCGAG      | -                   | 5 | 2 | 0 | 4.96 | 2.48 |      |
| Chr2:159436251-159436273 | 5 | RNA | GGCCGAGGTGCACTACCGGNNRG | GGCCaCa-CGCaACCTGgAG      | -                   | 5 | 2 | 0 | 4.96 | 2.48 |      |
| Chr4:165980880-165980902 | 4 | RNA | GGCCGAGGTGCACTACCGGNNRG | G-cAGGgTCCAGcAgCGCGGG     | +                   | 5 | 1 | 0 | 4.96 | 2.48 |      |
| Chr3:214260258-214260280 | 5 | RNA | GGCCGAGGTGCACTACCGGNNRG | GGC-HtGCGACTACCGCTGG      | +                   | 4 | 2 | 0 | 4.96 | 2.48 |      |
| Chr2:121783603-121783625 | 3 | RNA | GGCCGAGGTGCACTACCGGNNRG | GaC-AGGcTAgcTCCGCGAG      | -                   | 5 | 2 | 0 | 4.96 | 2.48 |      |
| Chr3:214892996-214893018 | 4 | RNA | GGCCGAGGTGCACTACCGGNNRG | G-CCGcGgTgGtACTHGGCAG     | -                   | 5 | 1 | 2 | 4.96 | 2.75 |      |
| Chr5:223279318-223279400 | 3 | RNA | GGCCGAGGTGCACTACCGGNNRG | GCG-AGAGTTCAGcCaCGAGAG    | -                   | 2 | 1 | 2 | 2.75 | 2.38 |      |
| Chr5:176274493-176274515 | 5 | RNA | GGCCGAGGTGCACTACCGGNNRG | GCGGAGGcGtGCT-cGgGATGG    | -                   | 5 | 1 | 2 | 2.75 | 2.38 |      |
| Chr5:173848653-173848675 | 4 | RNA | GGCCGAGGTGCACTACCGGNNRG | G-CCAGaGTCACTCTCGCTGG     | +                   | 4 | 1 | 3 | 1.65 | 2.33 |      |
| Chr2:179678271-179678293 | 3 | X   | GGCCGAGGTGCACTACCGGNNRG | GCGaAGcGcAGcACCGCGCG      | +                   | 5 | 0 | 3 | 1.65 | 2.33 |      |
| Chr4:121416807-121416829 | 3 | DNA | GGCCGAGGTGCACTACCGGNNRG | GaCaAGCAGcGAGcTCCAGCTGG   | -                   | 5 | 2 | 0 | 4.41 | 2.21 |      |
| Chr4:156821274-156821296 | 4 | RNA | GGCCGAGGTGCACTACCGGNNRG | G-cAGGgTCCAGcAgCGCGGG     | +                   | 5 | 1 | 0 | 4.41 | 2.21 |      |
| Chr5:160510373-160510395 | 3 | RNA | GGCCGAGGTGCACTACCGGNNRG | G-CCAGaGTAcCACTCGCTGG     | +                   | 5 | 1 | 0 | 4.41 | 2.21 |      |
| Chr2:120563297-120563319 | 2 |     |                         |                           |                     |   |   |   |      |      |      |

|                           |           |   |     |                          |                         |   |   |   |   |      |      |
|---------------------------|-----------|---|-----|--------------------------|-------------------------|---|---|---|---|------|------|
| Chr1:26437689-26437711    | 26437695  | 4 | RNA | GGCCGAGGTGCACTACCGGNNRG  | GtCgaAGgGg-TACCgGAG     | - | 5 | 2 | 0 | 4.41 | 2.21 |
| Chr6:169692089-169692111  | 169692104 | 5 | RNA | GGCCGAGGTGCACTACCGGNNRG  | GgGc-GaTcaACTCaGCTAG    | + | 5 | 1 | 0 | 4.41 | 2.21 |
| Chr8:20913523-20913545    | 20913540  | 3 | DNA | GGCCGAGGTGCACTACCGG-CNNR | GtGcGAGTGCATCTCCGCGG    | + | 5 | 1 | 0 | 4.41 | 2.21 |
| Chr10:23768318-23768340   | 23768324  | 4 | RNA | GGCCGAGGTGCACTACCGGNNRG  | GGCCGAGaGa-TACTCgAGG    | + | 5 | 2 | 0 | 4.41 | 2.21 |
| Chr2:90292371-90292393    | 90292376  | 3 | RNA | GGCCGAGGTGCACTACCGGNNRG  | GGCCG-GGTGTCACCGCGGG    | - | 4 | 1 | 0 | 4.41 | 2.21 |
| Chr6:71306205-71306227    | 71306211  | 4 | DNA | GGCCGAGGTGCACTACCGGNNRG  | GGCCGAGTTCATCCGCGAG     | - | 4 | 1 | 0 | 4.41 | 2.21 |
| Chr2:16285307-16285329    | 16285325  | 2 | RNA | GGCCGAGGTGCACTACCGGNNRG  | GcCCAGGccCGAT-CGGaAGG   | + | 5 | 2 | 0 | 4.41 | 2.21 |
| Chr5:36749334-36749356    | 36749338  | 2 | RNA | GGCCGAGGTGCACTACCGGNNRG  | GaCgGgGTGCTCT-CGgTAG    | - | 5 | 1 | 0 | 4.41 | 2.21 |
| Chr2:232550878-232550900  | 23255085  | 5 | RNA | GGCCGAGGTGCACTACCGGNNRG  | caCAGAGTGCCT-CCGCGAG    | - | 5 | 1 | 0 | 4.41 | 2.21 |
| Chr3:104176262-104176284  | 104176269 | 5 | RNA | GGCCGAGGTGCACTACCGGNNRG  | GGCCAGGcTccCT-CgGCTGG   | - | 4 | 1 | 0 | 4.41 | 2.21 |
| Chr2:210153486-210153508  | 210153493 | 5 | RNA | GGCCGAGGTGCACTACCGGNNRG  | GcCAGcaTcGcTAC-GCGGG    | - | 5 | 2 | 0 | 4.41 | 2.21 |
| Chr7:93462714-93462736    | 93462729  | 5 | RNA | GGCCGAGGTGCACTACCGGNNRG  | GGC-GaAGTcGaaGACtccCAG  | + | 5 | 1 | 0 | 4.41 | 2.21 |
| Chr2:188670649-188670671  | 188670667 | 2 | RNA | GGCCGAGGTGCACTACCGGNNRG  | GGCCG-GTtccACCGcAG      | + | 5 | 2 | 0 | 4.41 | 2.21 |
| Chr5:119886116-119886138  | 119886134 | 2 | DNA | GGCCGAGGTGCACTACCGGNNRG  | GcTCCGgGAGTCTCCGGCTGG   | + | 5 | 1 | 0 | 4.41 | 2.21 |
| Chr7:65064182-65064204    | 65064200  | 2 | RNA | GGCCGAGGTGCACTACCGGNNRG  | cCCGcGcTCT-CgACCGcGGG   | + | 5 | 2 | 0 | 4.41 | 2.21 |
| Chr7:94651792-94651814    | 94651810  | 2 | RNA | GGCCGAGGTGCACTACCGGNNRG  | GGCCGcTCCGTA-GaCCGG     | + | 5 | 2 | 0 | 4.41 | 2.21 |
| Chr7:101820957-101820979  | 101820963 | 4 | DNA | GGC-CGAGGTGCACTACCGGNNRG | GcTCCGgGcTCTCCGGCTGG    | - | 5 | 1 | 0 | 4.41 | 2.21 |
| Chr7:80303198-80303220    | 80303202  | 2 | RNA | GGCCGAGGTGCACTACCGGNNRG  | lGcAGGTGcAC-AcAGcGG     | - | 5 | 1 | 0 | 4.41 | 2.21 |
| Chr4:158415050-158415072  | 158415057 | 5 | RNA | GGCCGAGGTGCACTACCGGNNRG  | GA-C-AGTgTgCcaCCGcAG    | - | 5 | 2 | 0 | 4.41 | 2.21 |
| Chr10:26799035-26799057   | 26799042  | 5 | RNA | GGCCGAGGTGCACTACCGGNNRG  | cCCGcGataACT-CCGCGAG    | - | 5 | 1 | 0 | 4.41 | 2.21 |
| Chr4:222763126-222763148  | 222763131 | 3 | RNA | GGCCGAGGTGCACTACCGGNNRG  | G-aCGGGTCCAGcAGcGGG     | - | 5 | 1 | 0 | 4.41 | 2.21 |
| Chr1:3169837-3169859      | 3169855   | 2 | RNA | GGCCGAGGTGCACTACCGGNNRG  | GGa-AGGcACTACCaGCAAG    | + | 4 | 2 | 0 | 4.41 | 2.21 |
| Chr7:5224528-5224550      | 5224533   | 3 | X   | GGCCGAGGTGCACTACCGGNNRG  | GGCCGAGTGCAGcTCCGGCTGG  | - | 5 | 0 | 0 | 4.41 | 2.21 |
| Chr8:1338032-1338054      | 1338037   | 3 | RNA | GGCCGAGGTGCACTACCGGNNRG  | cGTCAGGTGAGcAGcACT-CCG  | - | 5 | 1 | 0 | 4.41 | 2.21 |
| Chr2:154847211-154847233  | 154847228 | 3 | RNA | GGCCGAGGTGCACTACCGGNNRG  | GGCCCAAGG-GACcACTCGG    | + | 5 | 2 | 0 | 4.41 | 2.21 |
| Chr5:117804758-117804780  | 117804762 | 2 | DNA | GGCCGAGGTGCACTACCGGNNRG  | GGCCGAGGTGCGAGcAGcGGaG  | - | 5 | 2 | 0 | 4.41 | 2.21 |
| Chr10:24024196-24024218   | 24024200  | 2 | RNA | GGCCGAGGTGCACTACCGGNNRG  | G-aCGGGTCCAGcAGcGGG     | - | 5 | 1 | 0 | 4.41 | 2.21 |
| Chr8:45808111-45808133    | 45808127  | 4 | RNA | GGCCGAGGTGCACTACCGGNNRG  | GGcGAAGTGC-THcGcCGAG    | + | 5 | 2 | 0 | 4.41 | 2.21 |
| Chr6:160577612-160577634  | 160577630 | 2 | RNA | GGCCGAGGTGCACTACCGGNNRG  | aGc-HGTCAGcACCGcCAAG    | + | 5 | 2 | 0 | 4.41 | 2.21 |
| Chr1:28144461-28144483    | 28144477  | 4 | RNA | GGCCGAGGTGCACTACCGGNNRG  | GgGAGGTCGcTc-CAcCGcAG   | + | 4 | 2 | 0 | 4.41 | 2.21 |
| Chr4:230159861-230159883  | 230159866 | 3 | RNA | GGCCGAGGTGCACTACCGGNNRG  | GGCC-AGGTGcTcACTCGGGGG  | + | 4 | 1 | 0 | 4.41 | 2.21 |
| Chr4:15656113-15656135    | 15656129  | 4 | RNA | GGCCGAGGTGCACTACCGGNNRG  | GGC-AGGcGAGcActaAGcAG   | + | 5 | 2 | 0 | 4.41 | 2.21 |
| Chr4:156382348-156382370  | 156382353 | 3 | DNA | GGCCGAGGTGCACTACCGGNNRG  | GGcGAGGTGcGcAGcAGcCAG   | - | 5 | 1 | 0 | 4.41 | 2.21 |
| Chr7:57927816-57927838    | 57927834  | 2 | RNA | GGCCGAGGTGCACTACCGGNNRG  | GgCAGGgTgGcAGcAaA-TCAG  | + | 5 | 2 | 0 | 4.41 | 2.21 |
| Chr2:243947671-243947693  | 243947693 | 2 | RNA | GGCCGAGGTGCACTACCGGNNRG  | t-CGGAGcGcTCTCCGGCTGG   | + | 5 | 2 | 0 | 4.41 | 2.21 |
| Chr1:151564214-151564236  | 151564220 | 4 | RNA | GGCCGAGGTGCACTACCGGNNRG  | cGgGAGG-GaAGaAGcGcAG    | - | 5 | 2 | 0 | 4.41 | 2.21 |
| Chr5:141834972-141834994  | 141834977 | 4 | RNA | GGCCGAGGTGCACTACCGGNNRG  | G-AGAGTGCAGcAGcGGG      | - | 5 | 2 | 0 | 4.41 | 2.21 |
| Chr3:22899129-22899151    | 22899145  | 4 | RNA | GGCCGAGGTGCACTACCGGNNRG  | GTCcG-GTgTcACcAGcGcAG   | + | 5 | 2 | 0 | 4.41 | 2.21 |
| Chr5:53466171-53466193    | 53466188  | 3 | RNA | GGCCGAGGTGCACTACCGGNNRG  | GcTcGAGTcTcTCTAG-CTGG   | + | 5 | 2 | 0 | 4.41 | 2.21 |
| Chr8:15070972-15070994    | 15070989  | 3 | RNA | GGCCGAGGTGCACTACCGGNNRG  | GcTcGAGGcCGAT-CcGgGGG   | + | 5 | 2 | 0 | 4.41 | 2.21 |
| Chr4:214932465-214932487  | 214932482 | 3 | RNA | GGCCGAGGTGCACTACCGGNNRG  | GgTgTGGTGCAGcA-GaAGG    | + | 5 | 2 | 0 | 4.41 | 2.21 |
| Chr1:107398153-107398175  | 107398158 | 3 | RNA | GGCCGAGGTGCACTACCGGNNRG  | GGCCGAGGT-CtTcTtCGG     | - | 5 | 2 | 0 | 4.41 | 2.21 |
| Chr4:18490741-18490763    | 18490745  | 2 | RNA | GGCCGAGGTGCACTACCGGNNRG  | GgACAGcAGcAGcAGcA-CTGG  | - | 5 | 2 | 0 | 4.41 | 2.21 |
| Chr4:181163887-181163909  | 181163892 | 3 | RNA | GGCCGAGGTGCACTACCGGNNRG  | aGc-tcGgGACTACCGCTGG    | - | 5 | 2 | 0 | 4.41 | 2.21 |
| Chr1:69266492-69266514    | 69266498  | 4 | RNA | GGCCGAGGTGCACTACCGGNNRG  | G-aCGGGTCCAGcAGcGGG     | + | 5 | 1 | 0 | 4.41 | 2.21 |
| Chr1:14211391-14211413    | 14211406  | 5 | RNA | GGCCGAGGTGCACTACCGGNNRG  | GGCCGAGGTGCGAGcAGcGGG   | - | 5 | 2 | 0 | 4.41 | 2.21 |
| Chr3:76297619-76297641    | 76297623  | 2 | RNA | GGCCGAGGTGCACTACCGGNNRG  | GgACAGTGCAGcA-GgTgTGG   | - | 4 | 1 | 0 | 4.41 | 2.21 |
| Chr1:60782069-60782091    | 60782074  | 3 | DNA | GGC-CGAGGTGCACTACCGGNNRG | GGCTcACTGCTACTCaCaCAGG  | - | 3 | 1 | 0 | 4.41 | 2.21 |
| Chr5:69002134-69002156    | 69002151  | 3 | RNA | GGCCGAGGTGCACTACCGGNNRG  | GcTcGAGGT-AactCCGCGAG   | + | 5 | 2 | 0 | 4.41 | 2.21 |
| Chr2:21783874-21783896    | 21783881  | 5 | RNA | GGCCGAGGTGCACTACCGGNNRG  | GaACAGTGCcTCCGgGAG      | - | 5 | 1 | 0 | 4.41 | 2.21 |
| Chr4:97278-97290          | 97283     | 3 | RNA | GGCCGAGGTGCACTACCGGNNRG  | GgACAGcAGcAGcAGcA-CCGGG | - | 5 | 2 | 0 | 4.41 | 2.21 |
| Chr2:133539387-133539409  | 133539402 | 5 | RNA | GGCCGAGGTGCACTACCGGNNRG  | caCAGTGCcT-CCGCGAG      | + | 5 | 2 | 0 | 4.41 | 2.21 |
| Chr2:77850122-77850144    | 77850137  | 5 | RNA | GGCCGAGGTGCACTACCGGNNRG  | GGC-AGGcAGcACTCCGCGG    | + | 5 | 2 | 0 | 4.41 | 2.21 |
| Chr5:108160504-108160526  | 108160522 | 2 | RNA | GGCCGAGGTGCACTACCGGNNRG  | G-CAGAGgTGCAGcCaGcAAG   | + | 5 | 2 | 0 | 4.41 | 2.21 |
| Chr1:199867954-199867976  | 199867961 | 5 | RNA | GGCCGAGGTGCACTACCGGNNRG  | GGC-GGcGcAGcACTCCGCGG   | - | 5 | 1 | 0 | 4.41 | 2.21 |
| Chr2:178852051-178852073  | 178852058 | 5 | RNA | GGCCGAGGTGCACTACCGGNNRG  | GGCCGAGGTGCGAGcAGcGGG   | - | 5 | 2 | 0 | 4.41 | 2.21 |
| Chr4:183543935-183543957  | 183543950 | 5 | RNA | GGCCGAGGTGCACTACCGGNNRG  | GGCCGAGGTGCG-aggGgTgGG  | + | 5 | 2 | 0 | 4.41 | 2.21 |
| Chr2:81903156-81903178    | 81903173  | 3 | RNA | GGCCGAGGTGCACTACCGGNNRG  | GgCAGAGTGC-THcGcAGAG    | + | 5 | 2 | 0 | 4.41 | 2.21 |
| Chr9:89455202-89455224    | 89455207  | 3 | RNA | GGCCGAGGTGCACTACCGGNNRG  | GgGgAGGTAAG-TACCgCGAG   | - | 5 | 2 | 0 | 4.41 | 2.21 |
| Chr8:121283895-121283917  | 121283903 | 3 | RNA | GGCCGAGGTGCACTACCGGNNRG  | G-AGAGTAAcCaAGcCAGG     | - | 5 | 2 | 0 | 4.41 | 2.21 |
| Chr4:82989186-82989208    | 82989204  | 2 | RNA | GGCCGAGGTGCACTACCGGNNRG  | GaCAAGTGC-TCCcAGTGG     | + | 5 | 2 | 0 | 4.41 | 2.21 |
| Chr1:4753025-4753047      | 4753030   | 3 | RNA | GGCCGAGGTGCACTACCGGNNRG  | GAca-GcTCCAGcAGcAGcGGG  | - | 5 | 1 | 0 | 4.41 | 2.21 |
| Chr1:127154321-127154343  | 127154337 | 4 | RNA | GGCCGAGGTGCACTACCGGNNRG  | GcCCAGcAGcAGcAGcA-AGAG  | + | 5 | 2 | 0 | 4.41 | 2.21 |
| Chr8:140452244-140452266  | 140452259 | 5 | RNA | GGCCGAGGTGCACTACCGGNNRG  | a-CGGGTCCAGcAGcAGcGGG   | + | 5 | 2 | 0 | 4.41 | 2.21 |
| Chr4:217051907-217051929  | 217051914 | 5 | RNA | GGCCGAGGTGCACTACCGGNNRG  | GgGcGAGTGCcGgTA-GgGAG   | - | 5 | 2 | 0 | 4.41 | 2.21 |
| Chr9:100659636-100659658  | 100659652 | 4 | RNA | GGCCGAGGTGCACTACCGGNNRG  | GGCCGAGGTGCGAGcAGcGGG   | - | 5 | 2 | 0 | 4.41 | 2.21 |
| Chr2:85713475-85713497    | 85713491  | 4 | RNA | GGCCGAGGTGCACTACCGGNNRG  | lG-GAGGAGcAGcAGcCTCGTGG | + | 5 | 2 | 0 | 4.41 | 2.21 |
| Chr8:60988167-60988189    | 60988173  | 4 | RNA | GGCCGAGGTGCACTACCGGNNRG  | T-CGGcGAGTCTCCGGCTGG    | - | 5 | 2 | 0 | 4.41 | 2.21 |
| Chr5:181078453-181078475  | 181078457 | 2 | RNA | GGCCGAGGTGCACTACCGGNNRG  | GgCAGAGTGC-THcGcAGAG    | - | 5 | 2 | 0 | 4.41 | 2.21 |
| Chr5:45229043-45229065    | 45229060  | 3 | RNA | GGCCGAGGTGCACTACCGGNNRG  | cGgGAGcT-AAcTACCGcCAG   | + | 5 | 2 | 0 | 4.41 | 2.21 |
| Chr3:229193108-229193130  | 229193113 | 3 | RNA | GGCCGAGGTGCACTACCGGNNRG  | GGC-tcGgGACTACCGCTGG    | - | 4 | 2 | 0 | 4.41 | 2.21 |
| Chr4:6514333-6514355      | 6514340   | 5 | RNA | GGCCGAGGTGCACTACCGGNNRG  | caCAGTGCcT-CCGCGAG      | - | 5 | 1 | 0 | 4.41 | 2.21 |
| Chr9:99959380-99959402    | 99959397  | 3 | RNA | GGCCGAGGTGCACTACCGGNNRG  | GgACAGcGGTGC-TCCcAGTGG  | + | 5 | 2 | 0 | 4.41 | 2.21 |
| Chr2:234019439-234019461  | 234019457 | 2 | RNA | GGCCGAGGTGCACTACCGGNNRG  | cGgCAGGTGCAG-CgGAGAG    | + | 5 | 2 | 0 | 4.41 | 2.21 |
| Chr10:147367339-147367361 | 147367354 | 5 | RNA | GGCCGAGGTGCACTACCGGNNRG  | G-CAGAGcAGcAGcAGcCGCG   | + | 5 | 2 | 0 | 4.41 | 2.21 |
| Chr5:10758350-10758372    | 10758368  | 2 | DNA | GGCCGAGGTGCACTACCGGNNRG  | GGCCGAGGTGCGAGcAGcGGG   | - | 5 | 2 | 0 | 4.41 | 2.21 |
| Chr1:236302922-236302944  | 236302938 | 4 | RNA | GGCCGAGGTGCACTACCGGNNRG  | G-aCGGGTCCAGcAGcGGG     | + | 5 | 1 | 0 | 4.41 | 2.21 |
| Chr5:138518702-138518724  | 138518717 | 2 | RNA | GGCCGAGGTGCACTACCGGNNRG  | GgTgTgGgTGA-ACCcCGCGG   | + | 5 | 2 | 0 | 4.41 | 2.21 |
| Chr9:58193135-58193157    | 58193153  | 2 | DNA | GGCCGAGGTGCACTACCGGNNRG  | GGCcaAGTGTAGAGcAGcAGG   | + | 5 | 2 | 0 | 4.41 | 2.21 |
| Chr1:33043023-33043045    | 33043040  | 3 | RNA | GGCCGAGGTGCACTACCGGNNRG  | GcTcGAGTCAAGcA-GGCTAG   | + | 5 | 2 | 0 | 4.41 | 2.21 |
| Chr8:100063800-100063822  | 100063815 | 5 | RNA | GGCCGAGGTGCACTACCGGNNRG  | caCAGTGCcT-CCGCGAG      | + | 5 | 1 | 0 | 4.41 | 2.21 |
| Chr7:66275684-66275706    | 66275689  | 3 | RNA | GGCCGAGGTGCACTACCGGNNRG  | GcCtactTCGACT-CCGCGAG   | + | 5 | 1 | 0 | 4.41 | 2.21 |
| Chr2:33024235-33024257    | 33024241  | 4 | RNA | GGCCGAGGTGCACTACCGGNNRG  | G-aCGGGTCCAGcAGcGGG     | - | 5 | 1 | 0 | 4.41 | 2.21 |
| Chr5:50647281-50647303    | 50647299  | 3 | RNA | GGCCGAGGTGCACTACCGGNNRG  | GgACAGcGgG-GaACTCGCTAG  | + | 5 | 2 | 0 | 4.41 | 2.21 |
| Chr4:74571845-74571867    | 74571862  | 2 | RNA | GGCCGAGGTGCACTACCGGNNRG  | GGC-tcGcAGcACTCCGGCTGG  | + | 5 | 2 | 0 | 4.41 | 2.21 |
| Chr9:100423307-100423329  | 100423314 | 5 | RNA | GGCCGAGGTGCACTACCGGNNRG  | GGCCGAGGTGCGAGcAGcGGG   | - | 5 | 2 | 0 | 4.41 | 2.21 |
| Chr8:2543199-2543221      | 25432217  | 2 | DNA | GGCCGAGGTGCACTACCGGNNRG  | cCCAGcTCCAGcAGcAGcCGCG  | - | 4 | 1 | 0 | 4.41 | 2.21 |
| Chr8:7676194-7676216      | 7676211   | 3 | RNA | GGCCGAGGTGCACTACCGGNNRG  | GaCAGGTGcAGC-CTAGcAG    | + | 5 | 2 | 0 | 4.41 | 2.21 |
| Chr4:174694702-174694724  | 174694718 | 4 | RNA | GGCCGAGGTGCACTACCGGNNRG  | G-CcGgGcTCCGcTCCgGcAG   | + | 5 | 1 | 0 | 4.41 | 2.21 |
| Chr8:14624935-14624957    | 14624951  | 4 | RNA | GGCCGAGGTGCACTACCGGNNRG  | G-aCGGGTCCAGcAGcGGG     | + | 5 | 1 | 0 | 4.41 | 2.21 |
| Chr10:146259686-146259708 | 146259691 | 3 | RNA | GGCCGAGGTGCACTACCGGNNRG  | GgGcAGcAGcAGcAGcAGcAG   | - | 4 | 2 | 0 | 4.41 | 2.21 |
| Chr2:126177717-126177739  | 126177735 | 2 | DNA | GGCCGAGGTGCACT-ACCcGNNRG | GgTGAAGcAGcAGcAGcAGcGGG | + | 5 | 1 | 0 | 4.41 | 2.21 |
| Chr7:16224428-16224450    | 16224432  | 2 | RNA | GGCCGAGGTGCACTACCGGNNRG  | aGCaAG-CaAGcCCGCGG      | + | 5 | 2 | 0 |      |      |

|                           |   |     |                        |                           |   |   |   |   |      |      |
|---------------------------|---|-----|------------------------|---------------------------|---|---|---|---|------|------|
| Chr5:10008881-10008903    | 3 | RNA | GGCCAGGTCGACTACCGGCRNG | GGCCacGtGg-cgCCGCGAG      | + | 5 | 2 | 4 | 0.00 | 2.00 |
| Chr6:124220122-124220144  | 2 | RNA | GGCCAGGTCGACTACCGGCRNG | GGC-HGcgGATACCGGCTGG      | - | 5 | 2 | 4 | 0.00 | 2.00 |
| Chr6:67659448-67659470    | 6 | RNA | GGCCAGGTCGACTACCGGCRNG | caCaAcTcGAC-gCCGCGAG      | + | 5 | 1 | 4 | 0.00 | 2.00 |
| Chr6:13467474-134674796   | 3 | DNA | GGCCAGGTCGACTACCGGCRNG | GGTCGGTTCGACTTggtGGCCGG   | + | 5 | 2 | 4 | 0.00 | 2.00 |
| Chr2:146280432-146280454  | 3 | RNA | GGCCAGGTCGACTACCGGCRNG | GgGc-AGdcCaCctcCGCCGG     | + | 5 | 1 | 4 | 0.00 | 2.00 |
| Chr6:52117489-52117511    | 3 | RNA | GGCCAGGTCGACTACCGGCRNG | GGCCAGGTCGACTACCGGCRNG    | + | 5 | 2 | 4 | 0.00 | 2.00 |
| Chr7:134571105-134571127  | 3 | RNA | GGCCAGGTCGACTACCGGCRNG | t-CGgGcGtCTCCGGCTGG       | + | 5 | 2 | 4 | 0.00 | 2.00 |
| Chr1:182262755-182262777  | 5 | RNA | GGCCAGGTCGACTACCGGCRNG | G-CGAAcCaCcaCtCCGAGG      | - | 5 | 2 | 4 | 0.00 | 2.00 |
| Chr8:91840490-91840512    | 3 | RNA | GGCCAGGTCGACTACCGGCRNG | G-cAGGTCGACaCgAgCGGG      | + | 5 | 1 | 4 | 0.00 | 2.00 |
| Chr2:160145330-160145352  | 3 | RNA | GGCCAGGTCGACTACCGGCRNG | GTCCG-GTgCaCcaCCGgaTAG    | + | 5 | 2 | 4 | 0.00 | 2.00 |
| Chr10:13123129-13123151   | 3 | RNA | GGCCAGGTCGACTACCGGCRNG | G-cAGGTCGACgAaCgCGGG      | - | 5 | 1 | 4 | 0.00 | 2.00 |
| Chr7:3261505-3261527      | 3 | RNA | GGCCAGGTCGACTACCGGCRNG | GGCCAGGTCGACTACCGGCRNG    | + | 5 | 2 | 4 | 0.00 | 2.00 |
| Chr1:273999940-273999962  | 3 | RNA | GGCCAGGTCGACTACCGGCRNG | GGC-tcGTGACTACCGHTGG      | - | 5 | 2 | 4 | 0.00 | 2.00 |
| Chr1:180020357-180020379  | 3 | RNA | GGCCAGGTCGACTACCGGCRNG | GaC-AGGcACTAgGGCCAG       | + | 5 | 2 | 4 | 0.00 | 2.00 |
| Chr1:129321538-129321560  | 3 | RNA | GGCCAGGTCGACTACCGGCRNG | GGTCGgGTgG-cgCCGCTGG      | - | 5 | 2 | 4 | 0.00 | 2.00 |
| Chr2:142398122-142398144  | 3 | RNA | GGCCAGGTCGACTACCGGCRNG | GGCCAGGTCGACTACCGGCRNG    | + | 5 | 2 | 4 | 0.00 | 2.00 |
| Chr5:101667792-101667814  | 3 | DNA | GGCCAGGTCGACTACCGGCRNG | GGCCGgGgGAgGgAaCCGGCCGG   | + | 5 | 2 | 4 | 0.00 | 2.00 |
| Chr10:100218755-100218777 | 3 | RNA | GGCCAGGTCGACTACCGGCRNG | Gg-AGGTCGtCtAggAgTGG      | - | 5 | 2 | 4 | 0.00 | 2.00 |
| Chr1:31114334-31114356    | 3 | RNA | GGCCAGGTCGACTACCGGCRNG | GGCCAGGTCGACTACCGGCRNG    | + | 5 | 2 | 4 | 0.00 | 2.00 |
| Chr6:46957466-46957488    | 5 | RNA | GGCCAGGTCGACTACCGGCRNG | GGCCGACTTCG-TgtgGGCAGG    | - | 5 | 2 | 4 | 0.00 | 2.00 |
| Chr1:124945096-124945118  | 3 | RNA | GGCCAGGTCGACTACCGGCRNG | GcGgAGGcGACT1-GGaAGG      | - | 5 | 2 | 4 | 0.00 | 2.00 |
| Chr1:21226460-21226482    | 3 | RNA | GGCCAGGTCGACTACCGGCRNG | GtCtGgGT-GaCaCCGGCCGG     | + | 5 | 1 | 4 | 0.00 | 2.00 |
| Chr1:195135647-195135669  | 3 | DNA | GGCCAGGTCGACTACCGGCRNG | cGCaAGGcGCaCAATCCGGCAGG   | - | 5 | 2 | 4 | 0.00 | 2.00 |
| Chr3:41464102-41464124    | 3 | RNA | GGCCAGGTCGACTACCGGCRNG | aGCaGg-CGAAgCCGGCTGG      | + | 5 | 2 | 4 | 0.00 | 2.00 |
| Chr7:155080042-155080064  | 3 | RNA | GGCCAGGTCGACTACCGGCRNG | G-cAGGTCGACaCgAgCGGG      | + | 5 | 1 | 4 | 0.00 | 2.00 |
| Chr4:51933306-51933328    | 3 | RNA | GGCCAGGTCGACTACCGGCRNG | GGCCAGGTCGACTACCGGCRNG    | + | 5 | 2 | 4 | 0.00 | 2.00 |
| Chr10:37362083-37362105   | 3 | RNA | GGCCAGGTCGACTACCGGCRNG | GaCCGgGTGcGc-ggAgCGAG     | - | 4 | 1 | 4 | 0.00 | 2.00 |
| Chr8:84846561-84846583    | 3 | RNA | GGCCAGGTCGACTACCGGCRNG | GgG-CGgCaCtCCGCGAG        | - | 5 | 1 | 4 | 0.00 | 2.00 |
| Chr10:136196658-136196680 | 3 | RNA | GGCCAGGTCGACTACCGGCRNG | GGC-AGGTCGAggACtggGGG     | - | 5 | 1 | 4 | 0.00 | 2.00 |
| Chr4:119702439-119702461  | 5 | DNA | GGCCAGGTCGACTACCGGCRNG | GgaAaGcGTGcGcCaCCGGCCGG   | - | 5 | 2 | 4 | 0.00 | 2.00 |
| Chr1:86560489-86560511    | 3 | RNA | GGCCAGGTCGACTACCGGCRNG | GTCCG-GTgCaCcaCCGgaAG     | + | 5 | 2 | 4 | 0.00 | 2.00 |
| Chr9:58389501-58389523    | 3 | RNA | GGCCAGGTCGACTACCGGCRNG | GgGcAGG-GcCTcAgGGCAGG     | - | 5 | 1 | 4 | 0.00 | 2.00 |
| Chr5:11844047-11844069    | 3 | RNA | GGCCAGGTCGACTACCGGCRNG | GgAtGAGGgGACT-CGGAAGG     | + | 5 | 2 | 4 | 0.00 | 2.00 |
| Chr3:124078529-124078551  | 3 | RNA | GGCCAGGTCGACTACCGGCRNG | GaCCGAGG-CGAGcAaCaAGG     | + | 5 | 1 | 4 | 0.00 | 2.00 |
| Chr3:205364199-205364221  | 3 | RNA | GGCCAGGTCGACTACCGGCRNG | GtaCRGTGtG-TgCCGCTAG      | - | 5 | 2 | 4 | 0.00 | 2.00 |
| Chr1:183235274-183235296  | 3 | RNA | GGCCAGGTCGACTACCGGCRNG | GtCCAGGTCGACTACCGGCRNG    | + | 5 | 2 | 4 | 0.00 | 2.00 |
| Chr1:16240986-16241008    | 3 | RNA | GGCCAGGTCGACTACCGGCRNG | G-CGgGTGcGagCCGGCAGG      | - | 5 | 2 | 4 | 0.00 | 2.00 |
| Chr1:262648365-262648387  | 3 | RNA | GGCCAGGTCGACTACCGGCRNG | GgGcGAGGCaAg-CCGcAAG      | + | 5 | 2 | 4 | 0.00 | 2.00 |
| Chr9:96047903-96047925    | 3 | RNA | GGCCAGGTCGACTACCGGCRNG | TgCaAGcTcGACTA-GHTGG      | + | 4 | 1 | 4 | 0.00 | 2.00 |
| Chr2:180716190-180716212  | 3 | X   | GGCCAGGTCGACTACCGGCRNG | GGCCAGGTCGACTACCGGCRNG    | + | 5 | 0 | 4 | 0.00 | 2.00 |
| Chr3:227746244-227746266  | 3 | DNA | GGCCAGGTCGACTACCGGCRNG | aGCaAGGtAgACTTAcCaCCGG    | + | 5 | 1 | 4 | 0.00 | 2.00 |
| Chr8:38451032-38451054    | 3 | DNA | GGCCAGGTCGACTACCGGCRNG | GgGcAGGgGTcCtACTAGGATAG   | + | 5 | 2 | 4 | 0.00 | 2.00 |
| Chr8:20852244-20852266    | 3 | RNA | GGCCAGGTCGACTACCGGCRNG | aGCCAGGtGgCT-cGgGGTGG     | + | 5 | 1 | 4 | 0.00 | 2.00 |
| Chr2:48116260-48116282    | 3 | DNA | GGCCAGGTCGACTACCGGCRNG | cGCCAGGTCGACTACCGGCRNG    | - | 2 | 1 | 4 | 0.00 | 2.00 |
| Chr1:125436389-125436411  | 3 | DNA | GGCCAGGTCGACTACCGGCRNG | G-cAGGTCGACTACCGGCRNG     | + | 5 | 2 | 4 | 0.00 | 2.00 |
| Chr9:132705053-132705075  | 3 | RNA | GGCCAGGTCGACTACCGGCRNG | G-cAGGTCGACTACCGGCRNG     | + | 5 | 2 | 4 | 0.00 | 2.00 |
| Chr7:85009248-85009270    | 3 | DNA | GGCCAGGTCGACTACCGGCRNG | GGCCAGGTCGACTACCGGCRNG    | + | 5 | 1 | 4 | 0.00 | 2.00 |
| Chr2:31242370-31242392    | 3 | RNA | GGCCAGGTCGACTACCGGCRNG | G-cAGGTCGACaCgAgCGGG      | - | 5 | 1 | 4 | 0.00 | 2.00 |
| Chr4:232476389-232476411  | 3 | RNA | GGCCAGGTCGACTACCGGCRNG | GcCtGgGTGcAGcA-GGGCGG     | - | 5 | 1 | 4 | 0.00 | 2.00 |
| Chr9:93973918-93973940    | 3 | RNA | GGCCAGGTCGACTACCGGCRNG | G-cAGGTCGACgAaCgAgCGGG    | + | 5 | 1 | 4 | 0.00 | 2.00 |
| Chr6:171250440-171250462  | 3 | RNA | GGCCAGGTCGACTACCGGCRNG | G-cAGGTCGACgAaCgAgCGGG    | + | 5 | 1 | 4 | 0.00 | 2.00 |
| Chr4:168158943-168158965  | 3 | RNA | GGCCAGGTCGACTACCGGCRNG | Gg-G-cAGGTCGTCGCGCTGG     | + | 5 | 2 | 4 | 0.00 | 2.00 |
| Chr7:19952895-19952917    | 3 | RNA | GGCCAGGTCGACTACCGGCRNG | cGAtGgGTCGACTCCGCGAG      | - | 5 | 1 | 4 | 0.00 | 2.00 |
| Chr8:97477095-97477117    | 3 | RNA | GGCCAGGTCGACTACCGGCRNG | G-cAGGTCGACaCgAgCGGG      | - | 5 | 1 | 4 | 0.00 | 2.00 |
| Chr5:26300924-26300946    | 3 | RNA | GGCCAGGTCGACTACCGGCRNG | cCCCAAGTCGATATC-CCGG      | + | 5 | 2 | 4 | 0.00 | 2.00 |
| Chr4:18115692-18115714    | 3 | RNA | GGCCAGGTCGACTACCGGCRNG | GTCC-GTAAAGGcAGcCAGG      | + | 5 | 1 | 4 | 0.00 | 2.00 |
| Chr2:129757375-129757397  | 3 | RNA | GGCCAGGTCGACTACCGGCRNG | GcGcAGGTCGACTACCGGCRNG    | + | 5 | 2 | 4 | 0.00 | 2.00 |
| Chr7:158315712-158315734  | 3 | RNA | GGCCAGGTCGACTACCGGCRNG | TGcGgGcGc-CTACCgCGGG      | - | 5 | 2 | 4 | 0.00 | 2.00 |
| Chr2:11761340-11761362    | 3 | RNA | GGCCAGGTCGACTACCGGCRNG | GgGcGAG-TcGcTgGcGgCGG     | + | 5 | 1 | 4 | 0.00 | 2.00 |
| Chr5:159362988-159363010  | 3 | RNA | GGCCAGGTCGACTACCGGCRNG | GgGgAGGTCG-TAgTGGCTAG     | + | 5 | 2 | 4 | 0.00 | 2.00 |
| Chr3:86696092-86696114    | 3 | RNA | GGCCAGGTCGACTACCGGCRNG | TgAAAGGc-ACTACCGCGGG      | + | 5 | 2 | 4 | 0.00 | 2.00 |
| Chr1:114353967-114353989  | 3 | RNA | GGCCAGGTCGACTACCGGCRNG | G-cAGGTCGACaCgAgCGGG      | + | 5 | 1 | 4 | 0.00 | 2.00 |
| Chr2:15249276-15249298    | 3 | RNA | GGCCAGGTCGACTACCGGCRNG | GGC-tcAGGTCGACTACCGGCRNG  | + | 5 | 2 | 4 | 0.00 | 2.00 |
| Chr2:206861186-206861208  | 3 | RNA | GGCCAGGTCGACTACCGGCRNG | G-cAGGTCGACaCgAgCGGG      | - | 5 | 1 | 4 | 0.00 | 2.00 |
| Chr7:10864793-10864815    | 3 | RNA | GGCCAGGTCGACTACCGGCRNG | G-cCCAAcTcGACTCCGGCGG     | + | 5 | 1 | 4 | 0.00 | 2.00 |
| Chr10:8411906-8411928     | 3 | RNA | GGCCAGGTCGACTACCGGCRNG | GGCCAGGTCGACTACCGGCRNG    | + | 5 | 2 | 4 | 0.00 | 2.00 |
| Chr3:175881186-175881208  | 3 | DNA | GGCCAGGTCGACTACCGGCRNG | cCCCAAGTCGATATC-CCGG      | + | 5 | 2 | 4 | 0.00 | 2.00 |
| Chr8:53735225-53735247    | 3 | RNA | GGCCAGGTCGACTACCGGCRNG | GGCCAGGTCGACTACCGGCRNG    | + | 4 | 1 | 4 | 0.00 | 2.00 |
| Chr2:4812860-4812882      | 3 | RNA | GGCCAGGTCGACTACCGGCRNG | GGC-AGGTCGACcAgGcCGGG     | - | 4 | 2 | 4 | 0.00 | 2.00 |
| Chr4:82988329-82988351    | 3 | RNA | GGCCAGGTCGACTACCGGCRNG | G-cAGGTCGACaCgAgCGGG      | + | 5 | 1 | 4 | 0.00 | 2.00 |
| Chr5:179004863-179004885  | 3 | RNA | GGCCAGGTCGACTACCGGCRNG | GGCCAGGTCGACTACCGGCRNG    | + | 5 | 1 | 4 | 0.00 | 2.00 |
| Chr5:214597217-214597239  | 3 | RNA | GGCCAGGTCGACTACCGGCRNG | G-cAGGTCGACgAaCgAgCGGG    | + | 5 | 1 | 4 | 0.00 | 2.00 |
| Chr4:85349755-85349777    | 3 | RNA | GGCCAGGTCGACTACCGGCRNG | GcCtGcAGGcGc-AcCaAgCGGG   | + | 5 | 2 | 4 | 0.00 | 2.00 |
| Chr5:33943533-33943555    | 3 | RNA | GGCCAGGTCGACTACCGGCRNG | aaCCAGGTCGc-gAaCCGCGGG    | + | 5 | 2 | 4 | 0.00 | 2.00 |
| Chr1:31715609-31715631    | 3 | DNA | GGCCAGGTCGACTACCGGCRNG | GGCCAGGTCGACTACCGGCRNG    | + | 4 | 1 | 4 | 0.00 | 2.00 |
| Chr1:1347414-1347436      | 3 | RNA | GGCCAGGTCGACTACCGGCRNG | GGCCAGGTCGACTACCGGCRNG    | + | 5 | 2 | 4 | 0.00 | 2.00 |
| Chr2:139524103-139524125  | 3 | RNA | GGCCAGGTCGACTACCGGCRNG | TgCaAGTTCGAA-AGGcCGAG     | + | 5 | 2 | 4 | 0.00 | 2.00 |
| Chr10:23197380-23197402   | 3 | RNA | GGCCAGGTCGACTACCGGCRNG | GtCtGgGTGcAGcAaCgAgCGGG   | - | 5 | 1 | 4 | 0.00 | 2.00 |
| Chr2:140990156-140990178  | 3 | RNA | GGCCAGGTCGACTACCGGCRNG | GgAgAGTTCGACaCCGgTAG      | + | 5 | 1 | 4 | 0.00 | 2.00 |
| Chr5:5911337-5911359      | 3 | RNA | GGCCAGGTCGACTACCGGCRNG | GgCgGcGc-CGAaTgCCGCGGG    | + | 5 | 2 | 4 | 0.00 | 2.00 |
| Chr2:46513443-46513465    | 3 | DNA | GGCCAGGTCGACTACCGGCRNG | aGcTcAGTGTGTCGACaCCGCGAGG | + | 5 | 2 | 4 | 0.00 | 2.00 |
| Chr10:131493815-131493837 | 3 | RNA | GGCCAGGTCGACTACCGGCRNG | cGgCGAGGTCaAc-CcaAGG      | - | 4 | 2 | 4 | 0.00 | 2.00 |
| Chr5:176620259-176620281  | 3 | X   | GGCCAGGTCGACTACCGGCRNG | GgaAaGgTgGcCTAgCGGCTGG    | + | 5 | 0 | 4 | 0.00 | 2.00 |
| Chr5:80606171-80606193    | 3 | DNA | GGCCAGGTCGACTACCGGCRNG | GGCCAGGTCGACTACCGGCRNG    | + | 5 | 1 | 4 | 0.00 | 2.00 |
| Chr7:130498762-130498784  | 3 | RNA | GGCCAGGTCGACTACCGGCRNG | GGCCAGGTCGACTACCGGCRNG    | + | 5 | 1 | 4 | 0.00 | 2.00 |
| Chr5:33255972-33256194    | 3 | RNA | GGCCAGGTCGACTACCGGCRNG | GgaAaGgTTCGACTACCGGCRNG   | + | 4 | 2 | 4 | 0.00 | 2.00 |
| Chr10:128991903-128991925 | 3 | RNA | GGCCAGGTCGACTACCGGCRNG | GGCCAGGTCGACTACCGGCRNG    | + | 5 | 2 | 4 | 0.00 | 2.00 |
| Chr2:34640592-34640614    | 3 | DNA | GGCCAGGTCGACTACCGGCRNG | GGCCAGGTCGACTACCGGCRNG    | + | 4 | 0 | 4 | 0.00 | 2.00 |
| Chr3:351798-351820        | 3 | RNA | GGCCAGGTCGACTACCGGCRNG | GtCtCtGc-AGCTACCGCTGG     | - | 4 | 2 | 4 | 0.00 | 2.00 |
| Chr1:162877173-162877195  | 3 | RNA | GGCCAGGTCGACTACCGGCRNG | GcCAAGcGcGACTTC-CCGG      | + | 5 | 2 | 4 | 0.00 | 2.00 |
| Chr1:201320643-201320665  | 3 | DNA | GGCCAGGTCGACTACCGGCRNG | GGCCAGGTCGACTACCGGCRNG    | + | 5 | 1 | 4 | 0.00 | 2.00 |
| Chr1:127874646-127874668  | 3 | RNA | GGCCAGGTCGACTACCGGCRNG | GgCaGcAGTgCT-CCGCTAG      | + | 5 | 2 | 4 | 0.00 | 2.00 |
| Chr6:129825767-129825789  | 3 | RNA | GGCCAGGTCGACTACCGGCRNG | GaCaG-GTTCGACaCaAgCGGG    | + | 5 | 1 | 4 | 0.00 | 2.00 |
| Chr6:75850568-75850590    | 3 | RNA | GGCCAGGTCGACTACCGGCRNG | GtCCAGGTC-1ACCgGgaAAG     | + | 5 | 2 | 4 | 0.00 | 2.00 |
| Chr2:17112862-17112884    | 3 | RNA | GGCCAGGTCGACTACCGGCRNG | GgaCGA-TCCGtATcGCTAG      | - | 5 | 2 | 4 | 0.00 | 2.00 |
| Chr8:10823740-10823762    | 3 | RNA | GGCCAGGTCGACTACCGGCRNG | GgCgGtGgGc-TgCCGCTGG      | + | 5 | 1 | 4 | 0.00 | 2.00 |
| Chr1:46853504-46853526    | 3 | RNA | GGCCAGGTCGACTACCGGCRNG | GcAGGTCGACcACTTCC-CCAG    | + | 5 | 2 | 4 | 0.00 | 2.00 |
| Chr3:221333190-221333212  | 3 | DNA | GGCCAGGTCGACTACCGGCRNG | GGCCAGGTCGACTACCGGCRNG    | + | 5 | 1 | 4 | 0.00 | 2.00 |
| Chr2:68901534-68901556    | 3 | RNA | GGCCAGGTCGACTACCGGCRNG | GTCCG-GTgCaCcaCCGgaAG     | - | 5 | 2 | 4 | 0.00 | 2.00 |
| Chr2:127858470-127858492  | 3 | RNA | GGCCAGGTCGACTACCGGCRNG | GcCtGgGgCGa-ACCgAgGGG     | + | 5 | 1 | 4 | 0.00 | 2.00 |
| Chr1:17372208-17372230    | 3 | RNA | GGCCAGGTCGACTACCGGCRNG | GGC-AGGTCGACgGgGgaGAG     | + | 5 | 1 | 4 | 0.00 | 2.00 |
| Chr6:3197598-3197620      | 3 | RNA | GGCCAGGTCGACTACCGGCRNG | GGC-AGGTCGAcCaCgAgCGGG    | + | 4 | 2 | 4 | 0.00 | 2.00 |
| Chr1:134626818-134626840  | 3 | RNA | GGCCAGGTCGACTACCGGCRNG | aGcGAGGTC-GtTcAGCGgAG     | + | 5 | 1 | 4 | 0.00 | 2.00 |
| Chr5:47099621-47099643    | 3 | DNA | GGCCAGGTCGACTACCGGCRNG | GtCCTGgGTGcGtCgGgCCAG     | + | 5 | 2 | 4 | 0.00 |      |

|                           |   |     |                           |                            |   |   |   |   |      |      |
|---------------------------|---|-----|---------------------------|----------------------------|---|---|---|---|------|------|
| Chr3:73246765-73246787    | 5 | DNA | GGCCGAGGTGCG-ACTACCGGCRNG | aGGCCAGTCTGGACACgGcCTGG    | - | 5 | 1 | 4 | 0.00 | 2.00 |
| Chr4:240094536-240094558  | 5 | RNA | GGCCGAGGTGCGACTACCGGCRNG  | GaGcGGGTGCT-CtGCGGCAAG     | - | 5 | 2 | 4 | 0.00 | 2.00 |
| Chr7:147092467-147092489  | 5 | RNA | GGCCGAGGTGCGACTACCGGCRNG  | GaGcAGT-GTGCACCGCCTCAG     | - | 5 | 1 | 4 | 0.00 | 2.00 |
| Chr2:123179232-123179254  | 5 | RNA | GGCCGAGGTGCGACTACCGGCRNG  | cGacCGGTGTGGT-CCGGCTG      | - | 5 | 2 | 4 | 0.00 | 2.00 |
| Chr4:67253674-67253696    | 3 | RNA | GGCCGAGGTGCGACTACCGGCRNG  | G-aCGGGTCTGAGcAGcGCGGG     | + | 5 | 2 | 4 | 0.00 | 2.00 |
| Chr8:56289293-56289315    | 5 | RNA | GGCCGAGGTGCGACTACCGGCRNG  | GGCCGAGTCTG-AGCAGCAAG      | + | 5 | 2 | 4 | 0.00 | 2.00 |
| Chr4:8852307-8852329      | 3 | RNA | GGCCGAGGTGCGACTACCGGCRNG  | GGCCGAGGcGcAG-gtCtGGCCGG   | + | 4 | 1 | 4 | 0.00 | 2.00 |
| Chr5:45238631-45238653    | 3 | RNA | GGCCGAGGTGCGACTACCGGCRNG  | cGgGAGTCT-AaTACGCTGG       | + | 5 | 2 | 4 | 0.00 | 2.00 |
| Chr4:245727074-245727096  | 3 | RNA | GGCCGAGGTGCGACTACCGGCRNG  | GaCGAGGcG-CAGcCaAGaGAG     | + | 5 | 1 | 4 | 0.00 | 2.00 |
| Chr8:47229298-47229320    | 3 | RNA | GGCCGAGGTGCGACTACCGGCRNG  | GaGcAGTCTGAGcAGcACCGCGAG   | + | 5 | 1 | 4 | 0.00 | 2.00 |
| Chr3:11648339-11648361    | 3 | RNA | GGCCGAGGTGCGACTACCGGCRNG  | GGCCG-GGTCTCTACcAGCGGG     | + | 3 | 1 | 4 | 0.00 | 2.00 |
| Chr2:230278562-230278584  | 3 | RNA | GGCCGAGGTGCGACTACCGGCRNG  | GGC-GAGGTGcGcCaCAGcGAG     | + | 4 | 1 | 4 | 0.00 | 2.00 |
| Chr3:138979077-138979099  | 5 | DNA | GGCCGAGGTGCGACTACCGGCRNG  | GcCaAGGTCTcAGcAGcAGcGCGGAG | + | 5 | 2 | 4 | 0.00 | 2.00 |
| Chr1:45965280-45965302    | 3 | RNA | GGCCGAGGTGCGACTACCGGCRNG  | G-aCGGGTCTGAGcCaAGcGCGGG   | + | 5 | 1 | 4 | 0.00 | 2.00 |
| Chr4:15893846-15893868    | 5 | RNA | GGCCGAGGTGCGACTACCGGCRNG  | GGCCGAGGcCaC-ctCGCGGG      | - | 5 | 1 | 4 | 0.00 | 2.00 |
| Chr6:47055610-47055632    | 5 | RNA | GGCCGAGGTGCGACTACCGGCRNG  | GGC-GAGGTGcAGgGTCGGCGGG    | + | 4 | 1 | 4 | 0.00 | 2.00 |
| Chr2:207164952-207164974  | 5 | DNA | GGCCGAGGTGCGACTACCGGCRNG  | GGCCGAGGcGAGTCTGAGcGCTAG   | + | 5 | 2 | 4 | 0.00 | 2.00 |
| Chr8:104457970-104457992  | 3 | RNA | GGCCGAGGTGCGACTACCGGCRNG  | GGCCAGGTCTGtT-CHCCAG       | + | 4 | 2 | 4 | 0.00 | 2.00 |
| Chr4:98753567-98753589    | 5 | RNA | GGCCGAGGTGCGACTACCGGCRNG  | GGcAGTcGACT-CCGAGAG        | - | 5 | 1 | 4 | 0.00 | 2.00 |
| Chr4:76254052-76254074    | 3 | RNA | GGCCGAGGTGCGACTACCGGCRNG  | aCaGcGcTCTGACT-GGaCGG      | + | 5 | 1 | 4 | 0.00 | 2.00 |
| Chr7:146006310-146006332  | 3 | RNA | GGCCGAGGTGCGACTACCGGCRNG  | GGC-tcGcTACCGCTGCTGG       | + | 5 | 2 | 4 | 0.00 | 2.00 |
| Chr9:158471032-158471054  | 5 | RNA | GGCCGAGGTGCGACTACCGGCRNG  | GGcAGGcCTGACT-CTGGTGG      | - | 5 | 1 | 4 | 0.00 | 2.00 |
| Chr10:41765069-41765091   | 3 | RNA | GGCCGAGGTGCGACTACCGGCRNG  | tGGCCAGGTGcATtGc-IGAG      | + | 5 | 2 | 4 | 0.00 | 2.00 |
| Chr4:173972750-173972772  | 5 | RNA | GGCCGAGGTGCGACTACCGGCRNG  | GGC-tcGGGACTACCGGCTGG      | - | 4 | 2 | 4 | 0.00 | 2.00 |
| Chr9:95151495-95151517    | 5 | RNA | GGCCGAGGTGCGACTACCGGCRNG  | G-CAGgTgTACTCTGGGCGAG      | - | 5 | 2 | 4 | 0.00 | 2.00 |
| Chr5:12137394-12137396    | 5 | DNA | GGC-CGAGGTCTGACTACCGGCRNG | GGCTCTGAGGcCaCAGcAGcAGG    | + | 4 | 2 | 4 | 0.00 | 2.00 |
| Chr3:135889118-13588920   | 3 | RNA | GGCCGAGGTGCGACTACCGGCRNG  | G-aCGGGTCTGAGcCaAGcGGG     | + | 5 | 1 | 4 | 0.00 | 2.00 |
| Chr7:74906280-74906302    | 3 | RNA | GGCCGAGGTGCGACTACCGGCRNG  | GGaCAAGTGG-TCcCAHTGG       | + | 5 | 2 | 4 | 0.00 | 2.00 |
| Chr5:5979307-5979329      | 3 | RNA | GGCCGAGGTGCGACTACCGGCRNG  | GGC-IGGtTgtTACCGGCTGG      | + | 5 | 2 | 4 | 0.00 | 2.00 |
| Chr10:48203183-48203205   | 5 | DNA | GGCCGAGGTGCGACTACCGGCRNG  | GGCCGAGGcGcTGGAGTGGCGGG    | + | 5 | 2 | 4 | 0.00 | 2.00 |
| Chr10:123821326-123821348 | 3 | DNA | GGC-CGAGGTCTGACTACCGGCRNG | GGCTGgGcGCTCTCCGGTGG       | + | 5 | 1 | 4 | 0.00 | 2.00 |
| Chr5:39492879-39492901    | 5 | RNA | GGCCGAGGTGCGACTACCGGCRNG  | GGcGAGGcGcGcGcCGGAG        | - | 5 | 1 | 4 | 0.00 | 2.00 |
| Chr10:73447433-73447455   | 3 | RNA | GGCCGAGGTGCGACTACCGGCRNG  | GGC-GHGCTGAGcAGcGCGGAG     | + | 4 | 1 | 4 | 0.00 | 2.00 |
| Chr8:47501040-47501062    | 5 | RNA | GGCCGAGGTGCGACTACCGGCRNG  | GGC-GHGCTGAGcAGcGCGGAG     | - | 5 | 1 | 4 | 0.00 | 2.00 |
| Chr1:306408702-306408724  | 5 | RNA | GGCCGAGGTGCGACTACCGGCRNG  | GGCCGAGGcGc-ActcCTGGCTGG   | - | 4 | 1 | 4 | 0.00 | 2.00 |
| Chr10:133023444-133023466 | 5 | RNA | GGCCGAGGTGCGACTACCGGCRNG  | GGCCGAGGTCTGCA-CTGGGAG     | + | 4 | 2 | 4 | 0.00 | 2.00 |
| Chr10:67597707-67597729   | 3 | RNA | GGCCGAGGTGCGACTACCGGCRNG  | GGaAGAGGTGGA-AGcGGCTGG     | + | 5 | 2 | 4 | 0.00 | 2.00 |
| Chr4:83768393-83768415    | 3 | RNA | GGCCGAGGTGCGACTACCGGCRNG  | G-CGcAGTCTGcTTCcCAHTGG     | + | 5 | 1 | 4 | 0.00 | 2.00 |
| Chr2:234081573-234081595  | 5 | RNA | GGCCGAGGTGCGACTACCGGCRNG  | GGGcGAG-CcctGCaAGcGCGGG    | + | 5 | 2 | 4 | 0.00 | 2.00 |
| Chr2:159986500-159986522  | 3 | RNA | GGCCGAGGTGCGACTACCGGCRNG  | a-CGGGTCTGAGcAGcAGcGCGG    | + | 5 | 2 | 4 | 0.00 | 2.00 |
| Chr5:202419688-202419710  | 5 | RNA | GGCCGAGGTGCGACTACCGGCRNG  | GGCCGAGGcGcGc-TgCaAGGAG    | - | 5 | 1 | 4 | 0.00 | 2.00 |
| Chr4:7796090-7796012      | 3 | RNA | GGCCGAGGTGCGACTACCGGCRNG  | G-aCGGGTCTGAGcCaAGcGCGGG   | + | 5 | 1 | 4 | 0.00 | 2.00 |
| Chr1:168924929-168924951  | 5 | RNA | GGCCGAGGTGCGACTACCGGCRNG  | GGCCGAGGcCaCAGcAGc-IGTGG   | - | 5 | 2 | 4 | 0.00 | 2.00 |
| Chr9:47542762-47542784    | 5 | RNA | GGCCGAGGTGCGACTACCGGCRNG  | GGaCAAGaCGA-ActaGcGGG      | + | 5 | 2 | 4 | 0.00 | 2.00 |
| Chr10:58657433-58657455   | 5 | RNA | GGCCGAGGTGCGACTACCGGCRNG  | GGcCAGcTCTcActT-CGGGcGAG   | - | 5 | 2 | 4 | 0.00 | 2.00 |
| Chr5:45429843-45429865    | 5 | DNA | GGCCGAGGTGCGACTACCGGCRNG  | GGCCGAGGTCTGACTACCGGCRNG   | + | 5 | 1 | 4 | 0.00 | 2.00 |
| Chr3:225236118-225236140  | 3 | RNA | GGCCGAGGTGCGACTACCGGCRNG  | GGcG-AGGcCaAGcCctCGGCTGG   | + | 5 | 1 | 4 | 0.00 | 2.00 |
| Chr6:82232717-82232739    | 5 | RNA | GGCCGAGGTGCGACTACCGGCRNG  | GGCCGAGG-GACTAHTGAG        | + | 5 | 2 | 4 | 0.00 | 2.00 |
| Chr8:149818340-149818362  | 5 | RNA | GGCCGAGGTGCGACTACCGGCRNG  | GGcTcGg-GaTAcCGGcAGG       | - | 5 | 2 | 4 | 0.00 | 2.00 |
| Chr6:98053960-98053982    | 5 | RNA | GGCCGAGGTGCGACTACCGGCRNG  | GGC-IGGGGACTACCGGCTGG      | + | 4 | 2 | 4 | 0.00 | 2.00 |
| Chr3:71561986-71562008    | 3 | RNA | GGCCGAGGTGCGACTACCGGCRNG  | GGcTgGcTgTACTA-GGTGG       | + | 5 | 2 | 4 | 0.00 | 2.00 |
| Chr1:76772416-76772438    | 3 | RNA | GGCCGAGGTGCGACTACCGGCRNG  | GGCCGAGGcGAGTCTGGCGGG      | + | 4 | 1 | 4 | 0.00 | 2.00 |
| Chr6:79695220-79695242    | 5 | RNA | GGCCGAGGTGCGACTACCGGCRNG  | cGacAGGCTGCAGc-CTGGTGG     | + | 5 | 2 | 4 | 0.00 | 2.00 |
| Chr4:18289866-18289888    | 3 | RNA | GGCCGAGGTGCGACTACCGGCRNG  | tcCGcGCTC-CTACGCTGAG       | + | 5 | 2 | 4 | 0.00 | 2.00 |
| Chr1:20534344-20534366    | 3 | RNA | GGCCGAGGTGCGACTACCGGCRNG  | GGCCGAGTCTGcTCTGG-CCAG     | + | 5 | 1 | 4 | 0.00 | 2.00 |
| Chr1:284438276-28443849   | 5 | RNA | GGCCGAGGTGCGACTACCGGCRNG  | GGCCGAGGTCTGCA-AGcAGGAG    | + | 4 | 2 | 4 | 0.00 | 2.00 |
| Chr8:27778827-27778849    | 5 | RNA | GGCCGAGGTGCGACTACCGGCRNG  | GCCaAGGAGTCTGACT-CCGCGGG   | + | 5 | 1 | 4 | 0.00 | 2.00 |
| Chr7:88047657-88047679    | 5 | RNA | GGCCGAGGTGCGACTACCGGCRNG  | GcCAGAGcCTGCAGc-CCGCAAG    | + | 5 | 2 | 4 | 0.00 | 2.00 |
| Chr5:34883315-34883337    | 3 | RNA | GGCCGAGGTGCGACTACCGGCRNG  | GGCCAGGTCTAC-AAGCGGGG      | + | 5 | 2 | 4 | 0.00 | 2.00 |
| Chr10:61211015-61211037   | 3 | RNA | GGCCGAGGTGCGACTACCGGCRNG  | GGc-GcGGTCTGAGcCaAGcGAG    | - | 5 | 1 | 4 | 0.00 | 2.00 |
| Chr7:48103098-48103120    | 3 | RNA | GGCCGAGGTGCGACTACCGGCRNG  | cGCTGtTcG-CTACCGCGGG       | + | 5 | 1 | 4 | 0.00 | 2.00 |
| Chr4:20039091-20039113    | 3 | RNA | GGCCGAGGTGCGACTACCGGCRNG  | GGCCGAGGcGcGc-TgGcGAGAG    | - | 5 | 1 | 4 | 0.00 | 2.00 |
| Chr8:56239433-56239455    | 5 | RNA | GGCCGAGGTGCGACTACCGGCRNG  | GGCTAATCTG-CaTCCGCAAG      | + | 5 | 2 | 4 | 0.00 | 2.00 |
| Chr4:167615394-167615416  | 5 | RNA | GGCCGAGGTGCGACTACCGGCRNG  | GcCaAGGcCa-ACTaGcCAGG      | + | 5 | 1 | 4 | 0.00 | 2.00 |
| Chr7:124047801-124047823  | 3 | RNA | GGCCGAGGTGCGACTACCGGCRNG  | G-aCGGGTCTGAGcCaAGcGCGGG   | + | 5 | 1 | 4 | 0.00 | 2.00 |
| Chr5:5112769-51127711     | 3 | RNA | GGCCGAGGTGCGACTACCGGCRNG  | GGCCGAGGTCTGACTACCGGCRNG   | + | 5 | 1 | 4 | 0.00 | 2.00 |
| Chr9:2720314-2720336      | 3 | RNA | GGCCGAGGTGCGACTACCGGCRNG  | GGc-AGGcCaAGcCctCGGCTGG    | + | 4 | 2 | 4 | 0.00 | 2.00 |
| Chr4:163688203-163688225  | 3 | RNA | GGCCGAGGTGCGACTACCGGCRNG  | aGCTGGGcGcTCTCCGGCTGG      | + | 5 | 1 | 4 | 0.00 | 2.00 |
| Chr2:58624502-58624524    | 3 | RNA | GGCCGAGGTGCGACTACCGGCRNG  | GGCCGAGGcGcGc-TgTcGcAGG    | + | 5 | 2 | 4 | 0.00 | 2.00 |
| Chr10:23982545-23982567   | 5 | RNA | GGCCGAGGTGCGACTACCGGCRNG  | GGcCaccGGTCTGcTTC-CCAG     | + | 5 | 2 | 4 | 0.00 | 2.00 |
| Chr10:36872891-36872913   | 3 | RNA | GGCCGAGGTGCGACTACCGGCRNG  | GGcAGGcGcGAGc-CCGAGG       | + | 5 | 2 | 4 | 0.00 | 2.00 |
| Chr4:102066013-102066035  | 5 | RNA | GGCCGAGGTGCGACTACCGGCRNG  | GGCTAHTGGTGA-ACCAGCGGG     | - | 4 | 2 | 4 | 0.00 | 2.00 |
| Chr5:37970769-37970791    | 5 | RNA | GGCCGAGGTGCGACTACCGGCRNG  | GGcGAGcTCTGcTGG-GGCTGG     | + | 4 | 1 | 4 | 0.00 | 2.00 |
| Chr10:3393507-3393529     | 3 | RNA | GGCCGAGGTGCGACTACCGGCRNG  | GGC-GGGTCTGAGcCaAGcGCGGG   | + | 5 | 1 | 4 | 0.00 | 2.00 |
| Chr1:43654628-43654650    | 5 | RNA | GGCCGAGGTGCGACTACCGGCRNG  | GGcGAGGcTCTGc-CTGGGAG      | - | 5 | 1 | 4 | 0.00 | 2.00 |
| Chr9:89774357-89774379    | 3 | RNA | GGCCGAGGTGCGACTACCGGCRNG  | GGCCGAGGTCTGCA-AGcAGGAG    | + | 5 | 2 | 4 | 0.00 | 2.00 |
| Chr5:70344497-70344519    | 5 | RNA | GGCCGAGGTGCGACTACCGGCRNG  | cCGCAAGGcGAGTACT-CCGCGG    | + | 5 | 2 | 4 | 0.00 | 2.00 |
| Chr4:132130720-132130742  | 5 | RNA | GGCCGAGGTGCGACTACCGGCRNG  | GGcGAGGTGCTTCC-AGGG        | - | 5 | 2 | 4 | 0.00 | 2.00 |
| Chr1:185121778-185121800  | 5 | RNA | GGCCGAGGTGCGACTACCGGCRNG  | tGcCAGGTGAT-CTGGCGGG       | + | 5 | 2 | 4 | 0.00 | 2.00 |
| Chr4:210483114-210483136  | 3 | RNA | GGCCGAGGTGCGACTACCGGCRNG  | cttCAGT-GAcACCcGGCGGG      | + | 5 | 1 | 4 | 0.00 | 2.00 |
| Chr8:23101791-23101813    | 3 | RNA | GGCCGAGGTGCGACTACCGGCRNG  | GGaCCGAGTCTGGgAG-CCGCGG    | + | 5 | 2 | 4 | 0.00 | 2.00 |
| Chr2:126141962-126141984  | 5 | RNA | GGCCGAGGTGCGACTACCGGCRNG  | GGCCG-GTCAAGgTgCGGGG       | - | 5 | 2 | 4 | 0.00 | 2.00 |
| Chr8:135158180-135158202  | 5 | RNA | GGCCGAGGTGCGACTACCGGCRNG  | GGcGAGGcGcGc-CTGGGAGG      | + | 5 | 2 | 4 | 0.00 | 2.00 |
| Chr7:148800280-148800302  | 5 | RNA | GGCCGAGGTGCGACTACCGGCRNG  | G-aCGAaGtGACTGcGCGGG       | - | 5 | 1 | 4 | 0.00 | 2.00 |
| Chr2:13203340-13203362    | 5 | RNA | GGCCGAGGTGCGACTACCGGCRNG  | GGcCGGTCTGAGcCaAGcGCGGG    | + | 5 | 2 | 4 | 0.00 | 2.00 |
| Chr9:112468027-112468049  | 5 | RNA | GGCCGAGGTGCGACTACCGGCRNG  | GGc-AGGcCaAGcCctCGGCTGG    | + | 4 | 2 | 4 | 0.00 | 2.00 |
| Chr10:85028172-85028194   | 5 | RNA | GGCCGAGGTGCGACTACCGGCRNG  | GGcGc-GcAGcCactCGGCGGG     | + | 5 | 1 | 4 | 0.00 | 2.00 |
| Chr8:53635449-53635471    | 5 | RNA | GGCCGAGGTGCGACTACCGGCRNG  | GGcGCGGcGcAGc-aggCTGcAGG   | + | 5 | 1 | 4 | 0.00 | 2.00 |
| Chr1:244737668-244737690  | 5 | RNA | GGCCGAGGTGCGACTACCGGCRNG  | tG-GAGGtGcTCTACCGATAG      | - | 5 | 2 | 4 | 0.00 | 2.00 |
| Chr5:140661156-140661178  | 3 | RNA | GGCCGAGGTGCGACTACCGGCRNG  | GCaAGAG-CGAGagGcGAG        | + | 5 | 2 | 4 | 0.00 | 2.00 |
| Chr2:46058366-46058388    | 5 | DNA | GGCCGAGGTGCGACTACCGGCRNG  | GgTcGtGCTGcTCCAGCGGgTGG    | + | 4 | 2 | 4 | 0.00 | 2.00 |
| Chr9:117900391-117900413  | 3 | RNA | GGCCGAGGTGCGACTACCGGCRNG  | GGaCAGa-aCGACTaAGcAGG      | + | 5 | 1 | 4 | 0.00 | 2.00 |
| Chr1:184583020-184583042  | 5 | RNA | GGCCGAGGTGCGACTACCGGCRNG  | G-aCGGGTCTGAGcCaAGcGCGGG   | + | 5 | 1 | 4 | 0.00 | 2.00 |
| Chr10:97034593-97034615   | 3 | RNA | GGCCGAGGTGCGACTACCGGCRNG  | GGCCGAGGcCaC-cCtGGCGGG     | + | 5 | 1 | 4 | 0.00 | 2.00 |
| Chr5:207541741-207541763  | 5 | RNA | GGCCGAGGTGCGACTACCGGCRNG  | GGC-AGGcTGAAGcCaAGcCGGG    | - | 4 | 2 | 4 | 0.00 | 2.00 |
| Chr9:14158180-14158202    | 5 | RNA | GGCCGAGGTGCGACTACCGGCRNG  | cGgGAGGcGcGcT-CCGCGGG      | + | 5 | 2 | 4 | 0.00 | 2.00 |
| Chr4:146716386-146716408  | 5 | DNA | GGC-CGAGGTCTGACTACCGGCRNG | GcTCTGGGAGTCTCTCCGGTGG     | + | 5 | 1 | 4 | 0.00 | 2.00 |
| Chr8:67100173-67100195    | 3 | DNA | GGCCGAGGTGCGACTACCGGCRNG  | GtAGcAGGAGaCHCTCCGCGAGG    | + | 5 | 2 | 4 | 0.00 | 2.00 |
| Chr10:69819188-69819210   | 4 | RNA | GGCCGAGGTGCGACTACCGGCRNG  | G-aCGGGTCTGAGcCaAGcGCGGG   | + | 5 | 2 | 4 | 3.86 | 1.93 |
| Chr2:228531948-228531970  | 3 | RNA | GGCCGAGGTGCGACTACCGGCRNG  | caCCAGcT-GATaCCCGCAAG      | + | 5 | 1 | 4 | 3.86 | 1.93 |
| Chr10:72184785-72184807   | 3 | RNA | GGCCGAGGTGCGACTACCGGCRNG  | cGACAGGcGcGAGcGAG-GaCAG    | + | 5 | 1 | 4 | 3.86 | 1.93 |
| Chr4:235263542-235263564  | 4 | RNA | GGCCGAGGTGCGACTACCGGCRNG  | GGCCGAG-CGGTcACCGCGAG      | - | 4 | 2 | 4 | 3.86 | 1.93 |
| Chr1:217753270-217753292  | 4 | D   |                           |                            |   |   |   |   |      |      |

|                           |   |     |                          |                          |   |   |   |   |      |      |
|---------------------------|---|-----|--------------------------|--------------------------|---|---|---|---|------|------|
| Chr8:44190575-44190597    | 4 | X   | GGCCGAGGTGCACTACCGGCGNRG | GGCCGAGGTGCACTACCGGCGNRG | - | 5 | 0 | 0 | 3.86 | 1.93 |
| Chr6:160678466-160678488  | 4 | RNA | GGCCGAGGTGCACTACCGGCGNRG | GGCCGAGGTGCACTACCGGCGNRG | - | 5 | 2 | 0 | 3.86 | 1.93 |
| Chr3:74291805-74291827    | 7 | RNA | GGCCGAGGTGCACTACCGGCGNRG | GGCCGAGGTGCACTACCGGCGNRG | + | 5 | 2 | 0 | 3.86 | 1.93 |
| Chr9:18823314-18823336    | 3 | DNA | GGCCGAGGTGCACTACCGGCGNRG | GGCCGAGGTGCACTACCGGCGNRG | - | 5 | 2 | 0 | 3.86 | 1.93 |
| Chr8:17798353-17798375    | 3 | DNA | GGCCGAGGTGCACTACCGGCGNRG | GGCCGAGGTGCACTACCGGCGNRG | + | 5 | 2 | 0 | 3.86 | 1.93 |
| Chr4:112747576-12747598   | 3 | RNA | GGCCGAGGTGCACTACCGGCGNRG | GGCCGAGGTGCACTACCGGCGNRG | + | 5 | 1 | 0 | 3.86 | 1.93 |
| Chr4:155736638-155736660  | 4 | RNA | GGCCGAGGTGCACTACCGGCGNRG | GGCCGAGGTGCACTACCGGCGNRG | + | 5 | 2 | 0 | 3.86 | 1.93 |
| Chr7:144874097-144874119  | 3 | RNA | GGCCGAGGTGCACTACCGGCGNRG | GGCCGAGGTGCACTACCGGCGNRG | - | 4 | 2 | 0 | 3.86 | 1.93 |
| Chr4:214892603-214892625  | 2 | RNA | GGCCGAGGTGCACTACCGGCGNRG | GGCCGAGGTGCACTACCGGCGNRG | - | 4 | 2 | 0 | 3.86 | 1.93 |
| Chr2:43582282-43582304    | 5 | RNA | GGCCGAGGTGCACTACCGGCGNRG | GGCCGAGGTGCACTACCGGCGNRG | - | 5 | 2 | 0 | 3.86 | 1.93 |
| Chr4:111778063-111778085  | 3 | DNA | GGCCGAGGTGCACTACCGGCGNRG | GGCCGAGGTGCACTACCGGCGNRG | + | 5 | 2 | 0 | 3.86 | 1.93 |
| Chr7:66574006-66574028    | 5 | RNA | GGCCGAGGTGCACTACCGGCGNRG | GGCCGAGGTGCACTACCGGCGNRG | + | 5 | 2 | 0 | 3.86 | 1.93 |
| Chr7:26177613-26177635    | 2 | RNA | GGCCGAGGTGCACTACCGGCGNRG | GGCCGAGGTGCACTACCGGCGNRG | + | 5 | 1 | 0 | 3.86 | 1.93 |
| Chr2:233522922-233522944  | 2 | DNA | GGCCGAGGTGCACTACCGGCGNRG | GGCCGAGGTGCACTACCGGCGNRG | - | 5 | 2 | 0 | 3.86 | 1.93 |
| Chr6:45111647-45111669    | 5 | RNA | GGCCGAGGTGCACTACCGGCGNRG | GGCCGAGGTGCACTACCGGCGNRG | + | 5 | 2 | 0 | 3.86 | 1.93 |
| Chr4:68139987-68140009    | 3 | DNA | GGCCGAGGTGCACTACCGGCGNRG | GGCCGAGGTGCACTACCGGCGNRG | + | 5 | 2 | 0 | 3.86 | 1.93 |
| Chr10:3395075-3395097     | 3 | RNA | GGCCGAGGTGCACTACCGGCGNRG | GGCCGAGGTGCACTACCGGCGNRG | + | 5 | 1 | 0 | 3.86 | 1.93 |
| Chr2:112130552-112130574  | 2 | RNA | GGCCGAGGTGCACTACCGGCGNRG | GGCCGAGGTGCACTACCGGCGNRG | + | 5 | 2 | 0 | 3.86 | 1.93 |
| Chr2:38389569-38389591    | 4 | RNA | GGCCGAGGTGCACTACCGGCGNRG | GGCCGAGGTGCACTACCGGCGNRG | + | 5 | 1 | 0 | 3.86 | 1.93 |
| Chr2:20603652-20603674    | 4 | RNA | GGCCGAGGTGCACTACCGGCGNRG | GGCCGAGGTGCACTACCGGCGNRG | + | 5 | 1 | 0 | 3.86 | 1.93 |
| Chr8:95939883-95939905    | 5 | RNA | GGCCGAGGTGCACTACCGGCGNRG | GGCCGAGGTGCACTACCGGCGNRG | + | 5 | 2 | 0 | 3.86 | 1.93 |
| Chr10:31129302-31129324   | 3 | RNA | GGCCGAGGTGCACTACCGGCGNRG | GGCCGAGGTGCACTACCGGCGNRG | - | 5 | 2 | 0 | 3.86 | 1.93 |
| Chr1:114440489-114440511  | 4 | RNA | GGCCGAGGTGCACTACCGGCGNRG | GGCCGAGGTGCACTACCGGCGNRG | + | 5 | 2 | 0 | 3.86 | 1.93 |
| Chr5:17147479-17147471    | 5 | RNA | GGCCGAGGTGCACTACCGGCGNRG | GGCCGAGGTGCACTACCGGCGNRG | + | 5 | 2 | 0 | 3.86 | 1.93 |
| Chr6:133846521-133846543  | 3 | RNA | GGCCGAGGTGCACTACCGGCGNRG | GGCCGAGGTGCACTACCGGCGNRG | + | 5 | 1 | 0 | 3.86 | 1.93 |
| Chr4:188949658-188949680  | 3 | RNA | GGCCGAGGTGCACTACCGGCGNRG | GGCCGAGGTGCACTACCGGCGNRG | + | 5 | 2 | 0 | 3.86 | 1.93 |
| Chr6:6386117-63861179     | 3 | RNA | GGCCGAGGTGCACTACCGGCGNRG | GGCCGAGGTGCACTACCGGCGNRG | + | 5 | 2 | 0 | 3.86 | 1.93 |
| Chr4:70742597-70742619    | 5 | DNA | GGCCGAGGTGCACTACCGGCGNRG | GGCCGAGGTGCACTACCGGCGNRG | + | 5 | 2 | 0 | 3.86 | 1.93 |
| Chr9:87693730-87693752    | 5 | RNA | GGCCGAGGTGCACTACCGGCGNRG | GGCCGAGGTGCACTACCGGCGNRG | - | 4 | 1 | 0 | 3.86 | 1.93 |
| Chr5:115279670-115279692  | 3 | RNA | GGCCGAGGTGCACTACCGGCGNRG | GGCCGAGGTGCACTACCGGCGNRG | - | 5 | 1 | 0 | 3.86 | 1.93 |
| Chr7:115193485-115193507  | 4 | DNA | GGCCGAGGTGCACTACCGGCGNRG | GGCCGAGGTGCACTACCGGCGNRG | + | 5 | 2 | 0 | 3.86 | 1.93 |
| Chr2:117480301-117480323  | 2 | RNA | GGCCGAGGTGCACTACCGGCGNRG | GGCCGAGGTGCACTACCGGCGNRG | + | 5 | 2 | 0 | 3.86 | 1.93 |
| Chr7:112568374-112568396  | 5 | DNA | GGCCGAGGTGCACTACCGGCGNRG | GGCCGAGGTGCACTACCGGCGNRG | + | 5 | 2 | 0 | 3.86 | 1.93 |
| Chr4:226154453-226154475  | 2 | RNA | GGCCGAGGTGCACTACCGGCGNRG | GGCCGAGGTGCACTACCGGCGNRG | + | 5 | 2 | 0 | 3.86 | 1.93 |
| Chr7:100627431-100627453  | 4 | RNA | GGCCGAGGTGCACTACCGGCGNRG | GGCCGAGGTGCACTACCGGCGNRG | + | 5 | 2 | 0 | 3.86 | 1.93 |
| Chr2:1219451341-121945136 | 4 | DNA | GGCCGAGGTGCACTACCGGCGNRG | GGCCGAGGTGCACTACCGGCGNRG | + | 5 | 2 | 0 | 3.86 | 1.93 |
| Chr5:101116620-101116620  | 4 | RNA | GGCCGAGGTGCACTACCGGCGNRG | GGCCGAGGTGCACTACCGGCGNRG | - | 5 | 2 | 0 | 3.86 | 1.93 |
| Chr6:100461764-100461786  | 5 | RNA | GGCCGAGGTGCACTACCGGCGNRG | GGCCGAGGTGCACTACCGGCGNRG | + | 5 | 2 | 0 | 3.86 | 1.93 |
| Chr10:59328656-59328678   | 5 | RNA | GGCCGAGGTGCACTACCGGCGNRG | GGCCGAGGTGCACTACCGGCGNRG | + | 5 | 2 | 0 | 3.86 | 1.93 |
| Chr6:40894804-40894826    | 4 | DNA | GGCCGAGGTGCACTACCGGCGNRG | GGCCGAGGTGCACTACCGGCGNRG | - | 5 | 2 | 0 | 3.86 | 1.93 |
| Chr2:130749520-130749542  | 3 | RNA | GGCCGAGGTGCACTACCGGCGNRG | GGCCGAGGTGCACTACCGGCGNRG | + | 5 | 2 | 0 | 3.86 | 1.93 |
| Chr8:148276540-148276562  | 5 | RNA | GGCCGAGGTGCACTACCGGCGNRG | GGCCGAGGTGCACTACCGGCGNRG | + | 5 | 2 | 0 | 3.86 | 1.93 |
| Chr3:214814567-214814589  | 2 | RNA | GGCCGAGGTGCACTACCGGCGNRG | GGCCGAGGTGCACTACCGGCGNRG | + | 5 | 2 | 0 | 3.86 | 1.93 |
| Chr9:8615474-8615496      | 4 | RNA | GGCCGAGGTGCACTACCGGCGNRG | GGCCGAGGTGCACTACCGGCGNRG | + | 5 | 2 | 0 | 3.86 | 1.93 |
| Chr10:5820897-5820899     | 5 | RNA | GGCCGAGGTGCACTACCGGCGNRG | GGCCGAGGTGCACTACCGGCGNRG | + | 5 | 2 | 0 | 3.86 | 1.93 |
| Chr7:86175542-86175544    | 2 | RNA | GGCCGAGGTGCACTACCGGCGNRG | GGCCGAGGTGCACTACCGGCGNRG | + | 5 | 2 | 0 | 3.86 | 1.93 |
| Chr2:68949268-68949290    | 4 | RNA | GGCCGAGGTGCACTACCGGCGNRG | GGCCGAGGTGCACTACCGGCGNRG | + | 5 | 1 | 0 | 3.86 | 1.93 |
| Chr2:173491681-173491703  | 3 | RNA | GGCCGAGGTGCACTACCGGCGNRG | GGCCGAGGTGCACTACCGGCGNRG | + | 5 | 2 | 0 | 3.86 | 1.93 |
| Chr3:52895550-52895572    | 5 | RNA | GGCCGAGGTGCACTACCGGCGNRG | GGCCGAGGTGCACTACCGGCGNRG | - | 5 | 2 | 0 | 3.86 | 1.93 |
| Chr1:98839477-98839499    | 3 | RNA | GGCCGAGGTGCACTACCGGCGNRG | GGCCGAGGTGCACTACCGGCGNRG | - | 5 | 2 | 0 | 3.86 | 1.93 |
| Chr1:182626386-182626408  | 5 | RNA | GGCCGAGGTGCACTACCGGCGNRG | GGCCGAGGTGCACTACCGGCGNRG | + | 5 | 2 | 0 | 3.86 | 1.93 |
| Chr2:146523658-146523680  | 2 | RNA | GGCCGAGGTGCACTACCGGCGNRG | GGCCGAGGTGCACTACCGGCGNRG | - | 5 | 2 | 0 | 3.86 | 1.93 |
| Chr2:172138984-172139006  | 2 | RNA | GGCCGAGGTGCACTACCGGCGNRG | GGCCGAGGTGCACTACCGGCGNRG | + | 5 | 1 | 0 | 3.86 | 1.93 |
| Chr2:126110818-126110840  | 5 | RNA | GGCCGAGGTGCACTACCGGCGNRG | GGCCGAGGTGCACTACCGGCGNRG | + | 5 | 2 | 0 | 3.86 | 1.93 |
| Chr4:243745475-243745497  | 3 | DNA | GGCCGAGGTGCACTACCGGCGNRG | GGCCGAGGTGCACTACCGGCGNRG | + | 5 | 2 | 0 | 3.86 | 1.93 |
| Chr1:173966036-173966058  | 4 | DNA | GGCCGAGGTGCACTACCGGCGNRG | GGCCGAGGTGCACTACCGGCGNRG | + | 5 | 2 | 0 | 3.86 | 1.93 |
| Chr10:82324963-82324985   | 2 | RNA | GGCCGAGGTGCACTACCGGCGNRG | GGCCGAGGTGCACTACCGGCGNRG | - | 4 | 1 | 0 | 3.86 | 1.93 |
| Chr2:227378348-227378370  | 2 | RNA | GGCCGAGGTGCACTACCGGCGNRG | GGCCGAGGTGCACTACCGGCGNRG | - | 5 | 2 | 0 | 3.86 | 1.93 |
| Chr4:118394836-118394858  | 5 | RNA | GGCCGAGGTGCACTACCGGCGNRG | GGCCGAGGTGCACTACCGGCGNRG | - | 5 | 2 | 0 | 3.86 | 1.93 |
| Chr1:120162202-120162224  | 5 | RNA | GGCCGAGGTGCACTACCGGCGNRG | GGCCGAGGTGCACTACCGGCGNRG | + | 5 | 1 | 0 | 3.86 | 1.93 |
| Chr10:98826797-98826819   | 3 | DNA | GGCCGAGGTGCACTACCGGCGNRG | GGCCGAGGTGCACTACCGGCGNRG | + | 5 | 2 | 0 | 3.86 | 1.93 |
| Chr1:30188569-30188591    | 5 | RNA | GGCCGAGGTGCACTACCGGCGNRG | GGCCGAGGTGCACTACCGGCGNRG | + | 4 | 2 | 0 | 3.86 | 1.93 |
| Chr2:88113739-88113761    | 2 | RNA | GGCCGAGGTGCACTACCGGCGNRG | GGCCGAGGTGCACTACCGGCGNRG | + | 5 | 2 | 0 | 3.86 | 1.93 |
| Chr7:72631088-72631110    | 5 | RNA | GGCCGAGGTGCACTACCGGCGNRG | GGCCGAGGTGCACTACCGGCGNRG | - | 5 | 1 | 0 | 3.86 | 1.93 |
| Chr7:166689941-166689963  | 4 | RNA | GGCCGAGGTGCACTACCGGCGNRG | GGCCGAGGTGCACTACCGGCGNRG | + | 5 | 2 | 0 | 3.86 | 1.93 |
| Chr3:70168578-70168600    | 3 | RNA | GGCCGAGGTGCACTACCGGCGNRG | GGCCGAGGTGCACTACCGGCGNRG | + | 5 | 2 | 0 | 3.86 | 1.93 |
| Chr5:211550440-211550462  | 3 | RNA | GGCCGAGGTGCACTACCGGCGNRG | GGCCGAGGTGCACTACCGGCGNRG | + | 5 | 1 | 0 | 3.86 | 1.93 |
| Chr2:84923420-84923442    | 5 | RNA | GGCCGAGGTGCACTACCGGCGNRG | GGCCGAGGTGCACTACCGGCGNRG | + | 3 | 1 | 0 | 3.86 | 1.93 |
| Chr3:145466295-145466317  | 5 | RNA | GGCCGAGGTGCACTACCGGCGNRG | GGCCGAGGTGCACTACCGGCGNRG | - | 5 | 1 | 0 | 3.86 | 1.93 |
| Chr1:234790404-234790426  | 4 | RNA | GGCCGAGGTGCACTACCGGCGNRG | GGCCGAGGTGCACTACCGGCGNRG | - | 5 | 2 | 0 | 3.86 | 1.93 |
| Chr10:109963533-109963555 | 2 | RNA | GGCCGAGGTGCACTACCGGCGNRG | GGCCGAGGTGCACTACCGGCGNRG | - | 5 | 2 | 0 | 3.86 | 1.93 |
| Chr7:18440241-18440263    | 5 | RNA | GGCCGAGGTGCACTACCGGCGNRG | GGCCGAGGTGCACTACCGGCGNRG | + | 5 | 1 | 0 | 3.86 | 1.93 |
| Chr1:22291976-22291998    | 4 | RNA | GGCCGAGGTGCACTACCGGCGNRG | GGCCGAGGTGCACTACCGGCGNRG | + | 4 | 1 | 0 | 3.86 | 1.93 |
| Chr9:43305404-43305426    | 5 | RNA | GGCCGAGGTGCACTACCGGCGNRG | GGCCGAGGTGCACTACCGGCGNRG | - | 5 | 2 | 0 | 3.86 | 1.93 |
| Chr2:206040861-206040883  | 4 | RNA | GGCCGAGGTGCACTACCGGCGNRG | GGCCGAGGTGCACTACCGGCGNRG | + | 5 | 1 | 0 | 3.86 | 1.93 |
| Chr2:1211243688-121124370 | 4 | RNA | GGCCGAGGTGCACTACCGGCGNRG | GGCCGAGGTGCACTACCGGCGNRG | + | 4 | 1 | 0 | 3.86 | 1.93 |
| Chr8:106126726-106126748  | 3 | RNA | GGCCGAGGTGCACTACCGGCGNRG | GGCCGAGGTGCACTACCGGCGNRG | + | 4 | 2 | 0 | 3.86 | 1.93 |
| Chr2:2036572-2036594      | 4 | RNA | GGCCGAGGTGCACTACCGGCGNRG | GGCCGAGGTGCACTACCGGCGNRG | - | 5 | 1 | 0 | 3.86 | 1.93 |
| Chr5:15367646-15367668    | 5 | RNA | GGCCGAGGTGCACTACCGGCGNRG | GGCCGAGGTGCACTACCGGCGNRG | + | 5 | 1 | 0 | 3.86 | 1.93 |
| Chr2:16626963-16626985    | 2 | RNA | GGCCGAGGTGCACTACCGGCGNRG | GGCCGAGGTGCACTACCGGCGNRG | + | 5 | 2 | 0 | 3.86 | 1.93 |
| Chr9:52520696-52520718    | 2 | DNA | GGCCGAGGTGCACTACCGGCGNRG | GGCCGAGGTGCACTACCGGCGNRG | + | 5 | 2 | 0 | 3.86 | 1.93 |
| Chr7:33158870-33158892    | 4 | X   | GGCCGAGGTGCACTACCGGCGNRG | GGCCGAGGTGCACTACCGGCGNRG | + | 5 | 0 | 0 | 3.86 | 1.93 |
| Chr9:37991745-37991767    | 5 | RNA | GGCCGAGGTGCACTACCGGCGNRG | GGCCGAGGTGCACTACCGGCGNRG | - | 5 | 2 | 0 | 3.86 | 1.93 |
| Chr7:97000429-97000451    | 4 | RNA | GGCCGAGGTGCACTACCGGCGNRG | GGCCGAGGTGCACTACCGGCGNRG | - | 5 | 2 | 0 | 3.86 | 1.93 |
| Chr7:8288060-8288082      | 5 | RNA | GGCCGAGGTGCACTACCGGCGNRG | GGCCGAGGTGCACTACCGGCGNRG | + | 5 | 2 | 0 | 3.86 | 1.93 |
| Chr3:153802895-153802917  | 3 | DNA | GGCCGAGGTGCACTACCGGCGNRG | GGCCGAGGTGCACTACCGGCGNRG | + | 5 | 2 | 0 | 3.86 | 1.93 |
| Chr1:107894824-107894846  | 3 | RNA | GGCCGAGGTGCACTACCGGCGNRG | GGCCGAGGTGCACTACCGGCGNRG | + | 5 | 2 | 0 | 3.86 | 1.93 |
| Chr9:155135-155157        | 5 | RNA | GGCCGAGGTGCACTACCGGCGNRG | GGCCGAGGTGCACTACCGGCGNRG | - | 5 | 2 | 0 | 3.86 | 1.93 |
| Chr10:101005287-101005309 | 2 | RNA | GGCCGAGGTGCACTACCGGCGNRG | GGCCGAGGTGCACTACCGGCGNRG | + | 5 | 2 | 0 | 3.86 | 1.93 |
| Chr5:122217141-122217163  | 3 | RNA | GGCCGAGGTGCACTACCGGCGNRG | GGCCGAGGTGCACTACCGGCGNRG | - | 4 | 1 | 0 | 3.86 | 1.93 |
| Chr5:79950097-79950119    | 4 | DNA | GGCCGAGGTGCACTACCGGCGNRG | GGCCGAGGTGCACTACCGGCGNRG | + | 5 | 2 | 0 | 3.86 | 1.93 |
| Chr2:134230735-134230757  | 4 | RNA | GGCCGAGGTGCACTACCGGCGNRG | GGCCGAGGTGCACTACCGGCGNRG | + | 5 | 2 | 0 | 3.86 | 1.93 |
| Chr2:87737890-87737912    | 2 | RNA | GGCCGAGGTGCACTACCGGCGNRG | GGCCGAGGTGCACTACCGGCGNRG | - | 5 | 2 | 0 | 3.86 | 1.93 |
| Chr10:53575327-53575349   | 4 | RNA | GGCCGAGGTGCACTACCGGCGNRG | GGCCGAGGTGCACTACCGGCGNRG | - | 5 | 1 | 0 | 3.86 | 1.93 |
| Chr3:81163555-81163577    | 3 | RNA | GGCCGAGGTGCACTACCGGCGNRG | GGCCGAGGTGCACTACCGGCGNRG | - | 5 | 2 | 0 | 3.86 | 1.93 |
| Chr1:20366793-20366815    | 4 | RNA | GGCCGAGGTGCACTACCGGCGNRG | GGCCGAGGTGCACTACCGGCGNRG | + | 5 | 1 | 0 | 3.86 | 1.93 |
| Chr2:11201974-11201996    | 3 | RNA | GGCCGAGGTGCACTACCGGCGNRG | GGCCGAGGTGCACTACCGGCGNRG | + | 5 | 2 | 0 | 3.86 | 1.93 |
| Chr2:51176098-51176120    | 2 | RNA | GGCCGAGGTGCACTACCGGCGNRG | GGCCGAGGTGCACTACCGGCGNRG | + | 5 | 2 | 0 | 3.86 | 1.93 |
| Chr8:17674943-17674965    | 2 | RNA | GGCCGAGGTGCACTACCGGCGNRG | GGCCGAGGTGCACTACCGGCGNRG | - | 5 | 2 | 0 | 3.86 | 1.93 |
| Chr8:78435436-78435458    | 4 | DNA | GGCCGAGGTGCACTACCGGCGNRG | GGCCGAGGTGCACTACCGGCGNRG | + | 5 | 1 | 0 | 3.86 | 1.93 |
| Chr8:28603190-28603212    | 2 | RNA | GGCCGAGGTGCACTACCGGCGNRG | GGCCGAGGTGCACTACCGGCGNRG | + | 5 | 2 | 0 | 3.86 | 1.93 |
| Chr5:30767483-30767505    | 2 | RNA |                          |                          |   |   |   |   |      |      |

|                           |           |   |     |                           |                              |   |   |   |   |      |      |
|---------------------------|-----------|---|-----|---------------------------|------------------------------|---|---|---|---|------|------|
| Chr2:122879933-122879955  | 122879937 | 2 | RNA | GGCCGAGGTGCACTACCGGCGNRG  | cGCC-AGGcGAgctCCGGCAGG       | - | 5 | 1 | 0 | 3.30 | 1.65 |
| Chr5:15899624-15899646    | 15899646  | 4 | RNA | GGCCGAGGTGCACTACCGGCGNRG  | GgAgGAgGgAgG-T-CGGCCAG       | + | 5 | 2 | 0 | 3.30 | 1.65 |
| Chr10:48356902-48356924   | 48356906  | 2 | DNA | GGCCGAGGTGCACTACCGGCGNRG  | GGGgAGGgGgTCTCaGAAGCCAG      | - | 3 | 2 | 0 | 3.30 | 1.65 |
| Chr7:135420232-135420254  | 135420237 | 4 | DNA | GGC-CGAGGTGCACTACCGGCGNRG | aGCTCGAGGcGgAGTgGgCGCGAG     | - | 5 | 1 | 0 | 3.30 | 1.65 |
| Chr7:31525853-31525875    | 31525859  | 4 | DNA | GGC-CGAGGTGCACTACCGGCGNRG | GGCCGAGGTGCACTACCGGCGNRG     | + | 5 | 2 | 0 | 3.30 | 1.65 |
| Chr2:24119474-24119496    | 24119492  | 2 | DNA | GGC-CGAGGTGCACTACCGGCGNRG | GG-CGAGGTGCACTACCGGCGNRG     | + | 5 | 1 | 0 | 3.30 | 1.65 |
| Chr5:91027512-9102774     | 9102758   | 4 | RNA | GGCCGAGGTGCACTACCGGCGNRG  | Gh-aAGGcGgTCTCGGCTGG         | + | 5 | 1 | 0 | 3.30 | 1.65 |
| Chr1:249986873-249986895  | 249986889 | 4 | RNA | GGCCGAGGTGCACTACCGGCGNRG  | GG-AGTCAaAaACCGGAgGG         | + | 5 | 2 | 0 | 3.30 | 1.65 |
| Chr2:79513821-79513843    | 79513838  | 3 | RNA | GGCCGAGGTGCACTACCGGCGNRG  | GGCCGAGGc-CaAcGATCGGAgGG     | + | 5 | 1 | 0 | 3.30 | 1.65 |
| Chr9:158828559-15882881   | 158828583 | 2 | RNA | GGCCGAGGTGCACTACCGGCGNRG  | Tg-AGGAaGAGCAcCTGCAAG        | + | 5 | 2 | 0 | 3.30 | 1.65 |
| Chr1:304064781-304064803  | 304064798 | 3 | RNA | GGCCGAGGTGCACTACCGGCGNRG  | cGcCAGGg-GaATcGgGAgGG        | + | 5 | 2 | 0 | 3.30 | 1.65 |
| Chr9:125811554-125811576  | 125811569 | 5 | RNA | GGCCGAGGTGCACTACCGGCGNRG  | GgCaGAGtGGAT-CGGCCAG         | + | 5 | 2 | 0 | 3.30 | 1.65 |
| Chr5:107175111-107175133  | 107175128 | 3 | RNA | GGCCGAGGTGCACTACCGGCGNRG  | GtCaAGcaCaACTACC-CGAG        | + | 5 | 2 | 0 | 3.30 | 1.65 |
| Chr8:38140537-38140559    | 38140542  | 3 | RNA | GGCCGAGGTGCACTACCGGCGNRG  | GGCCAGGTGCACTACCGGCGNRG      | - | 5 | 1 | 0 | 3.30 | 1.65 |
| Chr4:14402499-144024931   | 144024925 | 4 | RNA | GGCCGAGGTGCACTACCGGCGNRG  | GGCCAGGTGCACTACCGGCGNRG      | + | 5 | 1 | 0 | 3.30 | 1.65 |
| Chr7:93519602-93519624    | 93519607  | 3 | DNA | GGCCGAGGTGCACTACCGGCGNRG  | GGCCGAGGTGCACTACCGGCGNRG     | - | 4 | 2 | 0 | 3.30 | 1.65 |
| Chr5:192960636-192960658  | 192960654 | 2 | DNA | GGCCGAGGTGCACTACCGGCGNRG  | GtCCAGTGGGgAGCTCaCGGCGAG     | + | 5 | 2 | 0 | 3.30 | 1.65 |
| Chr7:16047436-16047458    | 16047443  | 5 | RNA | GGCCGAGGTGCACTACCGGCGNRG  | GgGCGAG-CGctgCaAGCGCGG       | - | 5 | 2 | 0 | 3.30 | 1.65 |
| Chr4:143196923-143196945  | 143196941 | 2 | DNA | GGCCGAGGTGCACTACCGGCGNRG  | GGTCAAGCTCGAGGcAGtGGCGGG     | + | 5 | 2 | 0 | 3.30 | 1.65 |
| Chr9:69062577-69062599    | 69062595  | 2 | RNA | GGCCGAGGTGCACTACCGGCGNRG  | GGC-AGGcGAGgAGCTGCGAG        | + | 5 | 1 | 0 | 3.30 | 1.65 |
| Chr3:7770701-7770723      | 7770718   | 3 | DNA | GGC-CGAGGTGCACTACCGGCGNRG | GGCTCaAcGcCaACTACCGGCGNRG    | + | 5 | 1 | 0 | 3.30 | 1.65 |
| Chr10:121024132-121024154 | 121024136 | 2 | RNA | GGCCGAGGTGCACTACCGGCGNRG  | GGCCGAGGTGCACTACCGGCGNRG     | - | 5 | 2 | 0 | 3.30 | 1.65 |
| Chr1:159291722-159291744  | 159291727 | 3 | DNA | GGCCGAGGTGCACTACCGGCGNRG  | GGCCGAGGTGCACTACCGGCGNRG     | + | 5 | 1 | 0 | 3.30 | 1.65 |
| Chr4:54536944-54536966    | 54536949  | 3 | DNA | GGCCGAGGTGCACTACCGGCGNRG  | GGHAGGAGGCTGAGCaGGGGG        | + | 5 | 1 | 0 | 3.30 | 1.65 |
| Chr2:105621831-105621853  | 105621836 | 3 | RNA | GGCCGAGGTGCACTACCGGCGNRG  | T-CGCAAGcGCTCAGcCGGCGAG      | + | 5 | 1 | 0 | 3.30 | 1.65 |
| Chr7:37989950-37989972    | 37989956  | 4 | RNA | GGCCGAGGTGCACTACCGGCGNRG  | GGCCGAGGTGCACTACCGGCGNRG     | + | 5 | 2 | 0 | 3.30 | 1.65 |
| Chr10:1696868-1696908     | 1696901   | 4 | RNA | GGCCGAGGTGCACTACCGGCGNRG  | GgCgGcGc-GgGgCGGCGAG         | + | 5 | 2 | 0 | 3.30 | 1.65 |
| Chr8:132268614-132268636  | 132268620 | 4 | RNA | GGCCGAGGTGCACTACCGGCGNRG  | GcCgGgGTgGg-CAcCGGAgGG       | + | 5 | 2 | 0 | 3.30 | 1.65 |
| Chr1:155052334-155052356  | 155052349 | 5 | RNA | GGCCGAGGTGCACTACCGGCGNRG  | GcCaGgGc-GcACaCaAGcGGG       | + | 5 | 1 | 0 | 3.30 | 1.65 |
| Chr4:10986142-10986164    | 10986149  | 5 | DNA | GGCCGAGGTGCACTACCGGCGNRG  | GGGCGAGGTGCTGcGAGGCGCAG      | + | 4 | 2 | 0 | 3.30 | 1.65 |
| Chr2:72771318-72771340    | 72771334  | 4 | RNA | GGCCGAGGTGCACTACCGGCGNRG  | GGC-tcGaaCTACCGGCTGG         | + | 4 | 2 | 0 | 3.30 | 1.65 |
| Chr10:129636421-129636443 | 129636437 | 4 | RNA | GGCCGAGGTGCACTACCGGCGNRG  | GcCCAGGcCGA-CAcctGgTGG       | + | 5 | 2 | 0 | 3.30 | 1.65 |
| Chr3:103618456-103618478  | 103618474 | 2 | DNA | GGCCGAGGTGCACTACCGGCGNRG  | GCCAGAGGCTGATCAcCaAG         | + | 5 | 1 | 0 | 3.30 | 1.65 |
| Chr2:18563696-18563718    | 18563701  | 3 | DNA | GGCCGAGGTGCACTACCGGCGNRG  | cGCaAGGTHcTGTAGCGGGTGG       | - | 5 | 1 | 0 | 3.30 | 1.65 |
| Chr7:8657947-8657969      | 8657952   | 3 | DNA | GGC-CGAGGTGCACTACCGGCGNRG | GcTCTGgGgGCTCTCGGCTGG        | - | 5 | 1 | 0 | 3.30 | 1.65 |
| Chr5:9761978-9761999      | 9761993   | 5 | RNA | GGCCGAGGTGCACTACCGGCGNRG  | GtCCc-CTgAGcAGCTAGCGGAGG     | + | 5 | 2 | 0 | 3.30 | 1.65 |
| Chr9:128092340-128092362  | 128092355 | 5 | RNA | GGCCGAGGTGCACTACCGGCGNRG  | GaaCAAGGTGG-TCcCaAGTGG       | + | 5 | 2 | 0 | 3.30 | 1.65 |
| Chr8:139942205-139942227  | 139942222 | 3 | DNA | GGCCGAGGTGCACTACCGGCGNRG  | GGGCGAGGTGCTGgAGGAGCGCAG     | + | 5 | 2 | 0 | 3.30 | 1.65 |
| Chr3:4825390-4825412      | 4825396   | 4 | RNA | GGCCGAGGTGCACTACCGGCGNRG  | GcCCAGGcCGAC-CCGCAAG         | + | 5 | 2 | 0 | 3.30 | 1.65 |
| Chr7:62390275-62390297    | 62390291  | 4 | RNA | GGCCGAGGTGCACTACCGGCGNRG  | GGGAGGcTCTGcGcAGG-GGCAAG     | + | 4 | 1 | 0 | 3.30 | 1.65 |
| Chr8:153505433-153505455  | 153505438 | 3 | RNA | GGCCGAGGTGCACTACCGGCGNRG  | GtCCAGcTCTcCCcCGCG           | - | 4 | 2 | 0 | 3.30 | 1.65 |
| Chr8:119767152-119767174  | 119767169 | 3 | RNA | GGCCGAGGTGCACTACCGGCGNRG  | GtGAGGtGgAGCa-GGGCGG         | + | 4 | 2 | 0 | 3.30 | 1.65 |
| Chr1:7338788-7338810      | 73387795  | 5 | RNA | GGCCGAGGTGCACTACCGGCGNRG  | G-aCGGCTGCaCaAGcGGCGG        | - | 5 | 1 | 0 | 3.30 | 1.65 |
| Chr7:48106004-48106026    | 48106020  | 4 | RNA | GGCCGAGGTGCACTACCGGCGNRG  | Gc-aCGGCTGCaCaAGcGGCGG       | + | 4 | 2 | 0 | 3.30 | 1.65 |
| Chr2:14499534-14499556    | 14499552  | 2 | RNA | GGCCGAGGTGCACTACCGGCGNRG  | GGCCCGA-1wccCaCCCGCGG        | + | 4 | 2 | 0 | 3.30 | 1.65 |
| Chr8:15801857-15801879    | 15801873  | 5 | RNA | GGCCGAGGTGCACTACCGGCGNRG  | GGC-AGGcGCTGAGCAcCGGCGG      | + | 3 | 2 | 0 | 3.30 | 1.65 |
| Chr2:115610922-115610944  | 115610927 | 3 | RNA | GGCCGAGGTGCACTACCGGCGNRG  | aGc-AGTGTGACTGCGGAgAG        | + | 5 | 2 | 0 | 3.30 | 1.65 |
| Chr5:159188090-159188112  | 159188097 | 5 | RNA | GGCCGAGGTGCACTACCGGCGNRG  | GGCCGAGGcCGG-TgCaAGGAgG      | + | 5 | 1 | 0 | 3.30 | 1.65 |
| Chr2:108882451-108882473  | 108882467 | 4 | DNA | GGCCGAGGTGCACTACCGGCGNRG  | TcCGAGGcCGACTCCCGGCGAG       | + | 5 | 2 | 0 | 3.30 | 1.65 |
| Chr4:120350896-120350918  | 120350914 | 4 | RNA | GGCCGAGGTGCACTACCGGCGNRG  | GGCCGAGGTGCACTACCGGCGNRG     | + | 5 | 2 | 0 | 3.30 | 1.65 |
| Chr3:39270810-39270832    | 39270815  | 3 | DNA | GGCCGAGGTGCACTACCGGCGNRG  | GgGtGAGaaGACTGACCcGGGG       | - | 5 | 1 | 0 | 3.30 | 1.65 |
| Chr6:29714832-29714854    | 29714850  | 2 | RNA | GGCCGAGGTGCACTACCGGCGNRG  | GgGgAGAGGcCG-TACaGAGCG       | + | 5 | 2 | 0 | 3.30 | 1.65 |
| Chr3:199787056-199787078  | 199787060 | 2 | RNA | GGCCGAGGTGCACTACCGGCGNRG  | GCCAGGcGcCG-TgCGGAgAG        | + | 5 | 1 | 0 | 3.30 | 1.65 |
| Chr8:139103175-139103197  | 139103182 | 5 | RNA | GGCCGAGGTGCACTACCGGCGNRG  | GGGcAGGCTG-1TcGCGCAGG        | - | 5 | 2 | 0 | 3.30 | 1.65 |
| Chr3:154781338-154781360  | 154781356 | 2 | RNA | GGCCGAGGTGCACTACCGGCGNRG  | G-CAGAGGcCGcCaCGcCGCG        | + | 5 | 2 | 0 | 3.30 | 1.65 |
| Chr1:18438664-18438686    | 18438670  | 4 | RNA | GGCCGAGGTGCACTACCGGCGNRG  | GgGcGAGGTGCG-TGcGgAGAG       | + | 5 | 2 | 0 | 3.30 | 1.65 |
| Chr8:153051902-153051924  | 153051918 | 4 | RNA | GGCCGAGGTGCACTACCGGCGNRG  | GGCCAGGcCGAG-CCGAgAGG        | + | 5 | 2 | 0 | 3.30 | 1.65 |
| Chr2:9239214-9239236      | 9239218   | 2 | RNA | GGCCGAGGTGCACTACCGGCGNRG  | GgGcGc-GGcCaACTCCGCGCG       | - | 5 | 1 | 0 | 3.30 | 1.65 |
| Chr7:135879138-135879160  | 135879144 | 4 | DNA | GGC-CGAGGTGCACTACCGGCGNRG | GtCCGAGGTGCTGCTCCGCTGG       | - | 5 | 1 | 0 | 3.30 | 1.65 |
| Chr9:15295368-15295390    | 15295374  | 4 | RNA | GGCCGAGGTGCACTACCGGCGNRG  | GCC-HGctGACTACCGGCTGG        | - | 4 | 2 | 0 | 3.30 | 1.65 |
| Chr5:168752859-168752881  | 168752865 | 4 | RNA | GGCCGAGGTGCACTACCGGCGNRG  | TgAGCAGGAGCaAGAG-GGCAAG      | - | 5 | 1 | 0 | 3.30 | 1.65 |
| Chr4:68993740-68993762    | 68993755  | 5 | RNA | GGCCGAGGTGCACTACCGGCGNRG  | aGcAGAGcCGA-AgCGCAAG         | + | 5 | 2 | 0 | 3.30 | 1.65 |
| Chr2:1392809-1392831      | 1392825   | 4 | RNA | GGCCGAGGTGCACTACCGGCGNRG  | G-aCGAGGTGAGcAGcAGCGGG       | + | 4 | 1 | 0 | 3.30 | 1.65 |
| Chr6:169119644-169119666  | 169119649 | 3 | RNA | GGCCGAGGTGCACTACCGGCGNRG  | GcCgAGGcCGAC-CCGTGAGG        | + | 5 | 2 | 0 | 3.30 | 1.65 |
| Chr2:90107750-90107772    | 90107756  | 4 | RNA | GGCCGAGGTGCACTACCGGCGNRG  | G-aCGGCTGCaGcAGcAGCGGG       | - | 5 | 1 | 0 | 3.30 | 1.65 |
| Chr6:9411871-9411893      | 9411877   | 2 | RNA | GGCCGAGGTGCACTACCGGCGNRG  | GGCCGAGGTGCACTACCGGCGNRG     | + | 5 | 2 | 0 | 3.30 | 1.65 |
| Chr1:259601813-259601835  | 259601829 | 4 | DNA | GGCCGAGGTGCACTACCGGCGNRG  | GcCGAGcCGAG-TCGACTACCGGCGNRG | + | 5 | 2 | 0 | 3.30 | 1.65 |
| Chr10:14976272-14976274   | 149762737 | 2 | DNA | GGCCGAGGTGCACTACCGGCGNRG  | GGCCGAGGTGCACTACCGGCGNRG     | + | 5 | 2 | 0 | 3.30 | 1.65 |
| Chr1:79911649-79911671    | 79911667  | 2 | RNA | GGCCGAGGTGCACTACCGGCGNRG  | GcCGGAGGcCaAaT-TGGCGAG       | + | 5 | 2 | 0 | 3.30 | 1.65 |
| Chr4:142083947-142083969  | 142083963 | 4 | RNA | GGCCGAGGTGCACTACCGGCGNRG  | GGGcAGGcCGACTACCGGCGNRG      | + | 5 | 2 | 0 | 3.30 | 1.65 |
| Chr2:112183309-112183331  | 112183315 | 4 | RNA | GGCCGAGGTGCACTACCGGCGNRG  | GGCCAGGTGgAGT-TAGAgAG        | + | 5 | 2 | 0 | 3.30 | 1.65 |
| Chr6:148381872-148381894  | 148381887 | 5 | RNA | GGCCGAGGTGCACTACCGGCGNRG  | GtC-tcctTGACTACCGGCGNRG      | + | 5 | 2 | 0 | 3.30 | 1.65 |
| Chr6:79844790-79844812    | 79844806  | 4 | DNA | GGCCGAGGTGCACTACCGGCGNRG  | GGCCGAGGTGAGTCTgagctCTGG     | + | 5 | 2 | 0 | 3.30 | 1.65 |
| Chr3:76184669-76184691    | 76184687  | 2 | RNA | GGCCGAGGTGCACTACCGGCGNRG  | GGGcGtGgGt-CTAaCGGCGAG       | + | 5 | 2 | 0 | 3.30 | 1.65 |
| Chr1:69014233-69014255    | 69014249  | 4 | RNA | GGCCGAGGTGCACTACCGGCGNRG  | aCCGAGGTGgGc-CCcCGAG         | + | 5 | 2 | 0 | 3.30 | 1.65 |
| Chr5:14896016-14896038    | 14896032  | 4 | X   | GGCCGAGGTGCACTACCGGCGNRG  | GcCCcGc-aGcAGTCTAG           | + | 5 | 2 | 0 | 3.30 | 1.65 |
| Chr4:34640935-34640957    | 34640950  | 5 | RNA | GGCCGAGGTGCACTACCGGCGNRG  | GgCGAGGcGcGCTCTCCTGAG        | + | 4 | 0 | 0 | 3.30 | 1.65 |
| Chr1:14600836-14600858    | 14600843  | 5 | DNA | GGCCGAGGTGCACTACCGGCGNRG  | GtCCAGGCTCaAGAGCGGAGG        | + | 5 | 1 | 0 | 3.30 | 1.65 |
| Chr5:150381051-150381073  | 150381057 | 4 | RNA | GGCCGAGGTGCACTACCGGCGNRG  | GGCCGAGGTGCACTACCGGCGNRG     | - | 5 | 2 | 0 | 3.30 | 1.65 |
| Chr8:59459813-59459835    | 59459817  | 2 | RNA | GGCCGAGGTGCACTACCGGCGNRG  | cCGCC-GTCACTCCGCGGG          | - | 5 | 2 | 0 | 3.30 | 1.65 |
| Chr5:81399374-81399396    | 81399391  | 3 | RNA | GGCCGAGGTGCACTACCGGCGNRG  | GcCCAGGcCGAGT-CCGAgAG        | + | 5 | 2 | 0 | 3.30 | 1.65 |
| Chr7:56199891-56199913    | 56199895  | 2 | RNA | GGCCGAGGTGCACTACCGGCGNRG  | GtCCAGGcGgG-gtGCGCGAG        | + | 5 | 2 | 0 | 3.30 | 1.65 |
| Chr8:27680198-27680220    | 27680215  | 3 | RNA | GGCCGAGGTGCACTACCGGCGNRG  | GGC-AGGcGAGcCTCGCGGG         | + | 5 | 2 | 0 | 3.30 | 1.65 |
| Chr7:60205438-60205460    | 60205442  | 2 | RNA | GGCCGAGGTGCACTACCGGCGNRG  | aGCTGcGgGACTACT-CTGG         | - | 5 | 2 | 0 | 3.30 | 1.65 |
| Chr2:46487787-46487809    | 46487804  | 3 | RNA | GGCCGAGGTGCACTACCGGCGNRG  | GaaCAAGGTGG-TCcCaGtTGG       | + | 5 | 2 | 0 | 3.30 | 1.65 |
| Chr1:122650852-122650874  | 122650860 | 2 | RNA | GGCCGAGGTGCACTACCGGCGNRG  | GGCCGAGGTGCACTACCGGCGNRG     | + | 5 | 2 | 0 | 3.30 | 1.65 |
| Chr9:121389305-121389327  | 121389320 | 2 | RNA | GGCCGAGGTGCACTACCGGCGNRG  | GtCCAGGc-GgCTACGCGGG         | + | 5 | 2 | 0 | 3.30 | 1.65 |
| Chr6:81106471-81106493    | 81106489  | 2 | RNA | GGCCGAGGTGCACTACCGGCGNRG  | GtCCAGGcGcGAG-CCGTCAGG       | + | 5 | 2 | 0 | 3.30 | 1.65 |
| Chr5:34015526-34015548    | 34015544  | 2 | RNA | GGCCGAGGTGCACTACCGGCGNRG  | TCCaAGGT-ACTACTGCTAG         | + | 5 | 2 | 0 | 3.30 | 1.65 |
| Chr8:113133356-113133378  | 113133360 | 2 | RNA | GGCCGAGGTGCACTACCGGCGNRG  | cCGCCGgGTCGACT-TGGAgAG       | + | 4 | 2 | 0 | 3.30 | 1.65 |
| Chr7:47143964-47143986    | 47143970  | 4 | RNA | GGCCGAGGTGCACTACCGGCGNRG  | GtCCAGGcCGAGG-CGGAGG         | + | 5 | 2 | 0 | 3.30 | 1.65 |
| Chr10:130917066-130917088 | 130917072 | 4 | RNA | GGCCGAGGTGCACTACCGGCGNRG  | cGcCGAGGcGAGCACTAC-CgAgAG    | - |   |   |   |      |      |

|                           |   |     |                           |                            |   |   |   |   |      |      |
|---------------------------|---|-----|---------------------------|----------------------------|---|---|---|---|------|------|
| Chr3:195863035-195863042  | 5 | DNA | GGCCGAGGTGACTA-CCGGCNRG   | cttCaAGGcGACAAATCCGGCAGG   | - | 5 | 2 | 3 | 0.00 | 1.50 |
| Chr9:9851479-9851501      | 3 | RNA | GGCCGAGGTGACTACCGGCGNRG   | GgtCaAGGcGAG-CtGGCCGG      | + | 5 | 2 | 3 | 0.00 | 1.50 |
| Chr9:22545982-22546004    | 2 | RNA | GGCCGAGGTGACTACCGGCGNRG   | GgtCaAGTcGgC-CCGCGAG       | + | 5 | 2 | 3 | 0.00 | 1.50 |
| Chr8:53892169-53892191    | 3 | RNA | GGCCGAGGTGACTACCGGCGNRG   | G-aCGGgTTCGACaAGcGGCGG     | + | 5 | 1 | 3 | 0.00 | 1.50 |
| Chr4:45405850-45405872    | 5 | RNA | GGCCGAGGTGACTACCGGCGNRG   | GgaCAAGTcG-CtCaAGaTGG      | - | 5 | 2 | 3 | 0.00 | 1.50 |
| Chr3:66790130-66790152    | 5 | RNA | GGCCGAGGTGACTACCGGCGNRG   | cttCaAGGcGACTA-CtGGaAG     | + | 5 | 2 | 3 | 0.00 | 1.50 |
| Chr2:58887090-58887112    | 3 | RNA | GGCCGAGGTGACTACCGGCGNRG   | GgGcCG-CtGcAGcCAcTCCGGCCGG | + | 5 | 1 | 3 | 0.00 | 1.50 |
| Chr3:193999605-193999627  | 3 | RNA | GGCCGAGGTGACTACCGGCGNRG   | GGCCGAGGcGCAC-CpGGAACAG    | + | 3 | 2 | 3 | 0.00 | 1.50 |
| Chr4:136515459-136515481  | 5 | RNA | GGCCGAGGTGACTACCGGCGNRG   | aGCCAGG-abAGtTcCtGGCGG     | + | 5 | 2 | 3 | 0.00 | 1.50 |
| Chr3:230050058-230050080  | 5 | RNA | GGCCGAGGTGACTACCGGCGNRG   | GtCCG-GTgCAcACCGGaTAG      | - | 5 | 2 | 3 | 0.00 | 1.50 |
| Chr6:55177304-55177326    | 3 | RNA | GGCCGAGGTGACTACCGGCGNRG   | GgtCGAGGtCgtTAC-GCCAG      | + | 5 | 2 | 3 | 0.00 | 1.50 |
| Chr10:100294613-100294635 | 3 | RNA | GGCCGAGGTGACTACCGGCGNRG   | t-CGAGGgCGACTCCGCGNRG      | + | 5 | 2 | 3 | 0.00 | 1.50 |
| Chr10:32442091-32442113   | 3 | RNA | GGCCGAGGTGACTACCGGCGNRG   | GgtCGcGtTGACTA-GGTtGG      | - | 5 | 2 | 3 | 0.00 | 1.50 |
| Chr8:64079907-64079929    | 3 | RNA | GGCCGAGGTGACTACCGGCGNRG   | GgaCAaGcGACTAC-GaTAG       | + | 5 | 2 | 3 | 0.00 | 1.50 |
| Chr9:7723232-7723254      | 5 | DNA | GGCCGAGGTGACTACCGGCGNRG   | GGCCGAGGcCGAGGtggGcCGAG    | - | 5 | 2 | 3 | 0.00 | 1.50 |
| Chr2:155189783-155189805  | 3 | RNA | GGCCGAGGTGACTACCGGCGNRG   | GtCCG-GTtCAcTCCGGaAG       | + | 5 | 2 | 3 | 0.00 | 1.50 |
| Chr4:33876484-33876506    | 3 | RNA | GGCCGAGGTGACTACCGGCGNRG   | YgCtG-GTgTACTCCGGCTGG      | + | 5 | 1 | 3 | 0.00 | 1.50 |
| Chr6:7358961-7358983      | 5 | DNA | GGCCGAGGTGACTACCGG-CNRG   | GGCCGAGGcGANTgCtCGCTCAG    | - | 5 | 2 | 3 | 0.00 | 1.50 |
| Chr8:40668907-40668929    | 5 | RNA | GGCCGAGGTGACTACCGGCGNRG   | GtCCGAGGT-GAGaAaCaCGCGG    | - | 5 | 1 | 3 | 0.00 | 1.50 |
| Chr2:12813627-12813649    | 3 | DNA | GGCCGAGGTGACTACCGG-CNRG   | cGCCAGTCACTcCaGCGCGG       | + | 5 | 1 | 3 | 0.00 | 1.50 |
| Chr4:228599171-228599193  | 3 | RNA | GGCCGAGGTGACTACCGGCGNRG   | aaCAAGTtGcCT-CCGCGAG       | - | 5 | 1 | 3 | 0.00 | 1.50 |
| Chr2:213719094-21371916   | 3 | RNA | GGCCGAGGTGACTACCGGCGNRG   | GtCCG-gcCAaCtCCGcCAGG      | - | 5 | 2 | 3 | 0.00 | 1.50 |
| Chr2:124931731-124931753  | 3 | RNA | GGCCGAGGTGACTACCGGCGNRG   | tGCCGGGTGcGg-CpGCGAGG      | + | 4 | 2 | 3 | 0.00 | 1.50 |
| Chr5:84770055-84770077    | 3 | RNA | GGCCGAGGTGACTACCGGCGNRG   | GGC-AGGcCGAcACCGCGCGG      | - | 3 | 2 | 3 | 0.00 | 1.50 |
| Chr4:63176355-63176377    | 3 | DNA | GGCCGAGGTGACTACCGGCGNRG   | GgcCActcTGATTCtACCGCGGAG   | + | 5 | 2 | 3 | 0.00 | 1.50 |
| Chr6:40009000-40009022    | 3 | RNA | GGCCGAGGTGACTACCGGCGNRG   | GtCCGAGGTGACTA-CtGATAG     | - | 5 | 2 | 3 | 0.00 | 1.50 |
| Chr4:11008653-11008675    | 5 | X   | GGCCGAGGTGACTACCGGCGNRG   | GgaagGAGTgGcCTAgCGGCTGG    | - | 5 | 0 | 3 | 0.00 | 1.50 |
| Chr4:188538030-188538052  | 5 | RNA | GGCCGAGGTGACTACCGGCGNRG   | G-aCGGCTGCAGcAGcGGCGG      | - | 5 | 0 | 3 | 0.00 | 1.50 |
| Chr3:77466751-77466773    | 3 | RNA | GGCCGAGGTGACTACCGGCGNRG   | tG-GAItGCTcAGtCGGcGGG      | + | 5 | 2 | 3 | 0.00 | 1.50 |
| Chr5:157330107-157330129  | 5 | DNA | GGC-CGAGGTGACTACCGGCGNRG  | GtCCGAGGcGAGcTtCCGGCTGG    | - | 5 | 1 | 3 | 0.00 | 1.50 |
| Chr5:11328005-11328027    | 5 | DNA | GGCCGAG-GTcGACTACCGGCGNRG | GtTCAGGCTCaCAgTCCGGCGG     | - | 5 | 1 | 3 | 0.00 | 1.50 |
| Chr10:39633639-39633661   | 3 | DNA | GGCCGAG-GTcGACTACCGGCGNRG | GGCCaCGACTCGACTCcaCGCGG    | + | 3 | 1 | 3 | 0.00 | 1.50 |
| Chr2:219570108-219570130  | 3 | RNA | GGCCGAGGTGACTACCGGCGNRG   | GGcGAGGTcGgTgGAGGCGAG      | + | 5 | 2 | 3 | 0.00 | 1.50 |
| Chr8:77297147-77297169    | 3 | DNA | GGCCGAGGTGACTACCGGCGNRG   | GgCAGtGTgGACTA-GaTAG       | + | 4 | 2 | 3 | 0.00 | 1.50 |
| Chr1:74967262-74967284    | 3 | RNA | GGCCGAGGTGACTACCGGCGNRG   | GaCaG-GTTCAGcACCaCGCGG     | + | 5 | 1 | 3 | 0.00 | 1.50 |
| Chr1:78346621-78346643    | 3 | RNA | GGCCGAGGTGACTACCGGCGNRG   | GtCCG-GTgCAcACCGGcAGG      | + | 5 | 2 | 3 | 0.00 | 1.50 |
| Chr4:91865786-91865808    | 5 | RNA | GGCCGAGGTGACTACCGGCGNRG   | GgCAAGTcCaACTC-CtGCGAG     | - | 5 | 1 | 3 | 0.00 | 1.50 |
| Chr6:80911482-80911504    | 3 | RNA | GGCCGAGGTGACTACCGGCGNRG   | GgtCGAGG-GtaTgCGCTGG       | + | 5 | 2 | 3 | 0.00 | 1.50 |
| Chr8:85467880-85467902    | 5 | DNA | GGCCGAGGTGACTACCGGCGNRG   | cGCCGAGGTGACTACCGGcTAG     | + | 5 | 1 | 3 | 0.00 | 1.50 |
| Chr5:11142263-11142285    | 3 | DNA | GGCCGAG-GTcGACTACCGGCGNRG | GtTCAGGCTCaCAgTCCGGCGG     | + | 5 | 1 | 3 | 0.00 | 1.50 |
| Chr4:42889199-42889221    | 5 | RNA | GGCCGAGGTGACTACCGGCGNRG   | GGC-tcGgGACTACCGCTGG       | - | 4 | 2 | 3 | 0.00 | 1.50 |
| Chr1:85673274-85673296    | 5 | RNA | GGCCGAGGTGACTACCGGCGNRG   | GGC-tcGgGACTACCGCTGG       | - | 5 | 2 | 3 | 0.00 | 1.50 |
| Chr2:206150669-206150691  | 5 | RNA | GGCCGAGGTGACTACCGGCGNRG   | caCAAGTtGCTcCT-CCGCGAG     | - | 5 | 1 | 3 | 0.00 | 1.50 |
| Chr1:286083702-286083724  | 3 | RNA | GGCCGAGGTGACTACCGGCGNRG   | GGCCGAGG-CGAgTgCtGtAGG     | + | 5 | 2 | 3 | 0.00 | 1.50 |
| Chr1:81781405-81781427    | 3 | RNA | GGCCGAGGTGACTACCGGCGNRG   | GGC-CGAGG-CtCpCAAGcCGCGG   | + | 5 | 2 | 3 | 0.00 | 1.50 |
| Chr8:69059183-69059205    | 3 | RNA | GGCCGAGGTGACTACCGGCGNRG   | GtCCGAGGTGACTA-CtGGaAG     | - | 5 | 1 | 3 | 0.00 | 1.50 |
| Chr7:43056476-43056498    | 3 | RNA | GGCCGAGGTGACTACCGGCGNRG   | GGCCcGgGATc-CTcCAcCGAG     | + | 5 | 2 | 3 | 0.00 | 1.50 |
| Chr7:85795292-85795314    | 3 | RNA | GGCCGAGGTGACTACCGGCGNRG   | GtCCAGGcCGAgT-GcCTAG       | - | 5 | 2 | 3 | 0.00 | 1.50 |
| Chr9:10786263-10786285    | 3 | RNA | GGCCGAGGTGACTACCGGCGNRG   | GGC-tcGgGACTACCGCTGG       | + | 4 | 2 | 3 | 0.00 | 1.50 |
| Chr2:188710859-188710881  | 3 | DNA | GGCCGAGG-TGcACTACCGGCGNRG | GGCCGAGAGcGcTcCCGCGGG      | + | 4 | 1 | 3 | 0.00 | 1.50 |
| Chr10:53404957-53404979   | 5 | RNA | GGCCGAGGTGACTACCGGCGNRG   | GgaAGAGGc-CTAcGCGCGG       | - | 5 | 2 | 3 | 0.00 | 1.50 |
| Chr3:202112108-202112130  | 3 | RNA | GGCCGAGGTGACTACCGGCGNRG   | GtTCAGTcGcCAcCaC-GaAG      | + | 5 | 2 | 3 | 0.00 | 1.50 |
| Chr1:223701304-223701326  | 3 | RNA | GGCCGAGGTGACTACCGGCGNRG   | GgtCGAGTcCaCAcACCGGAGG     | + | 5 | 1 | 3 | 0.00 | 1.50 |
| Chr1:244285271-244285293  | 3 | DNA | GGCCGAGGTGACTACCGGCGNRG   | GtCCAGGcGACaAGcGGCGGG      | + | 5 | 1 | 3 | 0.00 | 1.50 |
| Chr9:74069710-74069732    | 3 | RNA | GGCCGAGGTGACTACCGGCGNRG   | GgtCGAGTcCAcCT-CCGCGAG     | + | 4 | 1 | 3 | 0.00 | 1.50 |
| Chr7:14598944-14598966    | 5 | DNA | GGCCGAGGTGACTACCGG-CNRG   | GtCCGAGTcGcAGcCGGCTCGG     | + | 5 | 2 | 3 | 0.00 | 1.50 |
| Chr10:96085458-96085480   | 5 | RNA | GGCCGAGGTGACTACCGGCGNRG   | aCGcAGGcCGCA-AGcCAAGAG     | + | 4 | 2 | 3 | 0.00 | 1.50 |
| Chr3:71530987-71531009    | 3 | RNA | GGCCGAGGTGACTACCGGCGNRG   | GtCCGcGgGcGgCt-CpGCGCGG    | + | 5 | 2 | 3 | 0.00 | 1.50 |
| Chr1:134632198-134632220  | 3 | RNA | GGCCGAGGTGACTACCGGCGNRG   | cCGcGgGTC-CtAcAGcCGGAG     | + | 5 | 1 | 3 | 0.00 | 1.50 |
| Chr9:1353433-1353455      | 3 | RNA | GGCCGAGGTGACTACCGGCGNRG   | GG-ccCTGcAGcACcAGAG        | + | 5 | 2 | 3 | 0.00 | 1.50 |
| Chr7:8233790-8233812      | 3 | RNA | GGCCGAGGTGACTACCGGCGNRG   | GGCCGAGcGcCA-AGgGGGAG      | - | 5 | 2 | 3 | 0.00 | 1.50 |
| Chr4:243915434-243915456  | 5 | RNA | GGCCGAGGTGACTACCGGCGNRG   | a-cCGGcGTCAGcACcAGcGGG     | + | 5 | 1 | 3 | 0.00 | 1.50 |
| Chr6:36665946-36665968    | 5 | RNA | GGCCGAGGTGACTACCGGCGNRG   | GgaGcGg-CGAGcACCGCGAG      | - | 5 | 1 | 3 | 0.00 | 1.50 |
| Chr2:106984011-106984033  | 3 | RNA | GGCCGAGGTGACTACCGGCGNRG   | GG-GAGGTGACaAGgGAGAG       | - | 5 | 2 | 3 | 0.00 | 1.50 |
| Chr8:6373283-6373305      | 3 | RNA | GGCCGAGGTGACTACCGGCGNRG   | GGC-tcCaGACTACCGCTGG       | - | 5 | 2 | 3 | 0.00 | 1.50 |
| Chr8:98099744-98099766    | 3 | RNA | GGCCGAGGTGACTACCGGCGNRG   | GtCCGAGGTGACTA-CtGGaAG     | - | 5 | 1 | 3 | 0.00 | 1.50 |
| Chr2:49880304-49880326    | 5 | DNA | GGCCGAG-GTcGACTACCGGCGNRG | cGCCAGT-GTcGCTcACcCGcAG    | + | 5 | 2 | 3 | 0.00 | 1.50 |
| Chr8:94951551-94951573    | 3 | DNA | GGCCGAGGTGACTACCGGCGNRG   | aGcCAGAGcGAGTAgCGGCGG      | + | 5 | 1 | 3 | 0.00 | 1.50 |
| Chr4:282017-282039        | 3 | DNA | GGCCGAGGTGACTACCGGCGNRG   | GgcCAaTcGATTCtACCGCGAG     | + | 5 | 2 | 3 | 0.00 | 1.50 |
| Chr4:146362552-146362574  | 3 | RNA | GGCCGAGGTGACTACCGGCGNRG   | G-cCGGCTGcAGcACcAGcGAG     | + | 5 | 1 | 3 | 0.00 | 1.50 |
| Chr6:150702946-150702968  | 5 | RNA | GGCCGAGGTGACTACCGGCGNRG   | GgaCAcCccGACT-CCGGTGG      | - | 5 | 1 | 3 | 0.00 | 1.50 |
| Chr6:6554771-6554793      | 3 | RNA | GGCCGAGGTGACTACCGGCGNRG   | GcCCAGGcGcCA-ActGcTGG      | + | 5 | 2 | 3 | 0.00 | 1.50 |
| Chr8:139110353-139110375  | 3 | RNA | GGCCGAGGTGACTACCGGCGNRG   | cGCCAGTcGATcA-GtCCAG       | - | 5 | 2 | 3 | 0.00 | 1.50 |
| Chr4:246679674-246679696  | 5 | RNA | GGCCGAGGTGACTACCGGCGNRG   | GGCTc-GcCAcTCCGGCGAG       | - | 5 | 2 | 3 | 0.00 | 1.50 |
| Chr4:148403328-148403350  | 5 | RNA | GGCCGAGGTGACTACCGGCGNRG   | GgaCAcC-CGACTtCGCGGG       | + | 5 | 2 | 3 | 0.00 | 1.50 |
| Chr8:44405456-44405478    | 3 | RNA | GGCCGAGGTGACTACCGGCGNRG   | GtCCGAGGcGcA-TAcCGaAGG     | + | 5 | 2 | 3 | 0.00 | 1.50 |
| Chr7:137679183-137679205  | 3 | RNA | GGCCGAGGTGACTACCGGCGNRG   | GgaCAAGTGGG-TcCAaAGTGG     | + | 4 | 2 | 3 | 0.00 | 1.50 |
| Chr6:100859359-100859381  | 5 | RNA | GGCCGAGGTGACTACCGGCGNRG   | GGC-AGGcCAcCctCCGCGCGG     | - | 4 | 2 | 3 | 0.00 | 1.50 |
| Chr2:134158352-134158374  | 3 | RNA | GGCCGAGGTGACTACCGGCGNRG   | GGC-tcCaGACTACCGCTGG       | - | 4 | 2 | 3 | 0.00 | 1.50 |
| Chr6:172138342-172138364  | 3 | RNA | GGCCGAGGTGACTACCGGCGNRG   | t-CGGcGAGcTtCCGGCTGG       | + | 5 | 2 | 3 | 0.00 | 1.50 |
| Chr9:34716853-34716875    | 3 | RNA | GGCCGAGGTGACTACCGGCGNRG   | aGCCAGTtG-GTAcCaGcAG       | + | 5 | 2 | 3 | 0.00 | 1.50 |
| Chr2:58230730-58230752    | 3 | RNA | GGCCGAGGTGACTACCGGCGNRG   | CaCAgAGGTgGACTA-GtCAGG     | + | 5 | 2 | 3 | 0.00 | 1.50 |
| Chr7:66577596-66577618    | 3 | RNA | GGCCGAGGTGACTACCGGCGNRG   | GGCCAGcCtCG-CCtGgGAG       | - | 5 | 2 | 3 | 0.00 | 1.50 |
| Chr10:74059386-74059408   | 3 | RNA | GGCCGAGGTGACTACCGGCGNRG   | GtCG-GGcCAcCtCCGCGGG       | + | 5 | 1 | 3 | 0.00 | 1.50 |
| Chr1:258847360-258847382  | 5 | RNA | GGCCGAGGTGACTACCGGCGNRG   | GGC-AGGcCctcAGcGGcAGG      | - | 4 | 2 | 3 | 0.00 | 1.50 |
| Chr5:8787614-87876163     | 3 | DNA | GGCCGAGGTGACTACCGGCGNRG   | tGGcGAGGTGACTA-CtGGaAGG    | - | 5 | 1 | 3 | 0.00 | 1.50 |
| Chr10:22027543-22027565   | 3 | RNA | GGCCGAGGTGACTACCGGCGNRG   | G-cGCGAGcGAGcACCGCTGG      | + | 5 | 2 | 3 | 0.00 | 1.50 |
| Chr3:132257332-132257354  | 3 | DNA | GGCCGAGGTGACTACCGGCGNRG   | GtCTCGGAGcGtTtCCGGCTGG     | + | 5 | 1 | 3 | 0.00 | 1.50 |
| Chr4:138186651-138186673  | 3 | RNA | GGCCGAGGTGACTACCGGCGNRG   | GtCCGcGg-CGAGtCCGCGGG      | + | 5 | 1 | 3 | 0.00 | 1.50 |
| Chr2:26553003-26553025    | 5 | RNA | GGCCGAGGTGACTACCGGCGNRG   | GtCCGAGGTGcGcC-CcAGgGAG    | + | 5 | 2 | 3 | 0.00 | 1.50 |
| Chr3:205099959-205099981  | 5 | RNA | GGCCGAGGTGACTACCGGCGNRG   | tCCAGAGTGG-CtCCGAGTAG      | - | 5 | 2 | 3 | 0.00 | 1.50 |
| Chr3:12054105-12054127    | 3 | RNA | GGCCGAGGTGACTACCGGCGNRG   | tGgaAGGtGAGAcCA-GCTGG      | + | 5 | 2 | 3 | 0.00 | 1.50 |
| Chr4:9116443-9116465      | 3 | RNA | GGCCGAGGTGACTACCGGCGNRG   | cGAcGAGtTcGACcAc-CGCCAG    | + | 4 | 2 | 3 | 0.00 | 1.50 |
| Chr7:72561296-72561318    | 3 | RNA | GGCCGAGGTGACTACCGGCGNRG   | GgGcGAGcTtTt-AGcCGCGAG     | + | 5 | 1 | 3 | 0.00 | 1.50 |
| Chr7:45607765-45607787    | 3 | DNA | GGCCGAGGTGACTACCGG-CNRG   | cGCCGAGTtCGAGcCGGcAG       | + | 5 | 1 | 3 | 0.00 | 1.50 |
| Chr9:63648216-63648238    | 3 | RNA | GGCCGAGGTGACTACCGGCGNRG   | GtCCCaGAGTAT-CtCCAG        | + | 5 | 2 | 3 | 0.00 | 1.50 |
| Chr8:145308585-145308607  | 5 | DNA | GGCCGAGGTGACTACCGGCGNRG   | aGcCAGGTTCcGACaAGcGGcCAGG  | + | 5 | 2 | 3 | 0.00 | 1.50 |
| Chr6:90307141-90307163    | 3 | DNA | GGCCGAGGTGACTACCGGCGNRG   | GtCCcGAGcGACTGcCGCGCGG     | + | 5 | 1 | 3 | 0.00 | 1.50 |
| Chr4:85644323-85644345    | 3 | RNA | GGCCGAGGTGACTACCGGCGNRG   | GggGgGtTCAG-CgGCGAG        | + | 5 | 2 | 3 | 0.00 | 1.50 |
| Chr6:65905996-65906018    | 5 | RNA | GGCCGAGGTGACTACCGGCGNRG   | aGCCcCG-GGaTcCCGCGAG       | + | 5 | 2 | 3 | 0.00 | 1.50 |
| Chr5:62958383-62958405    | 3 | RNA | GGCCGAGGTGACTACCGGCGNRG   | GgGcCG-AGcCAcCtCCGCGGG     | + | 5 | 1 | 3 | 0.00 | 1.50 |
| Chr3:221386973-221386995  | 3 | RNA | GGCCGAGGTGACTACCGGCGNRG   | GtCCG-GTgCAcACCGcAG        | + | 5 | 2 | 3 | 0.00 | 1.50 |
| Chr9:107556476-107556498  | 3 | RNA | GGCCGAGGTGACTACCGGCGNRG   | GtCCG-GTgCAcACCGcAG        | - | 5 | 2 | 3 | 0.00 | 1    |



|                           |   |     |                          |                           |   |   |   |   |      |      |
|---------------------------|---|-----|--------------------------|---------------------------|---|---|---|---|------|------|
| Chr10:78654684-78654706   | 5 | RNA | GGCCGAGGTGCACTACCGGCRNG  | GGC-GAGGTGAGgACtCGGGGG    | - | 5 | 1 | 3 | 0.00 | 1.50 |
| Chr1:267012530-267012552  | 5 | RNA | GGCCGAGGTGCACTACCGGCRNG  | G-aCGGGTGCACaCgAGCGGG     | - | 5 | 1 | 3 | 0.00 | 1.50 |
| Chr10:125820073-125820095 | 5 | DNA | GGCCGAGGTGCACTACCCGCRNG  | GGGGAAGTTCgCgCaGAGCGCAG   | - | 5 | 2 | 3 | 0.00 | 1.50 |
| Chr4:94800265-94800287    | 5 | RNA | GGCCGAGGTGCACTACCGGCRNG  | tGCGgGtGCTGACTAC-GGAAG    | - | 5 | 1 | 3 | 0.00 | 1.50 |
| Chr4:10013239-10013261    | 3 | RNA | GGCCGAGGTGCACTACCGGCRNG  | tTCCGAGtCCGATTA-GGCAAG    | + | 5 | 2 | 3 | 0.00 | 1.50 |
| Chr9:120983383-120983400  | 3 | DNA | GGCCGAGGTGCACTACCGGCRNG  | GGGCGAGGTGATTA-GAGCGAG    | + | 5 | 2 | 3 | 0.00 | 1.50 |
| Chr4:13009066-13009068    | 3 | RNA | GGCCGAGGTGCACTACCGGCRNG  | GgGcGAGGTc-ACgagCGGcAG    | + | 5 | 2 | 3 | 0.00 | 1.50 |
| Chr4:6496967-6496989      | 3 | RNA | GGCCGAGGTGCACTACCGGCRNG  | GgGcGcGgGcGg-gACaGCGGGG   | + | 5 | 2 | 3 | 0.00 | 1.50 |
| Chr6:36624904-36624926    | 5 | RNA | GGCCGAGGTGCACTACCGGCRNG  | tGCCGAGGTGc-TAItGcGGG     | + | 5 | 2 | 3 | 0.00 | 1.50 |
| Chr5:101643973-101643995  | 5 | RNA | GGCCGAGGTGCACTACCGGCRNG  | GGC-HtGgGACTACtGGCTAG     | - | 5 | 2 | 3 | 0.00 | 1.50 |
| Chr2:222670902-222670924  | 3 | RNA | GGCCGAGGTGCACTACCGGCRNG  | G-HtGcGcGAGtTCCGGCGGG     | + | 5 | 2 | 3 | 0.00 | 1.50 |
| Chr7:21137739-21137761    | 3 | DNA | GGCCGAGGTGCACTACCGGCRNG  | GGtCGAGGtCGACTACtCGaAGGG  | + | 4 | 1 | 3 | 0.00 | 1.50 |
| Chr8:172012767-172012789  | 3 | RNA | GGCCGAGGTGCACTACCGGCRNG  | caC-AGGTcGCTACtCGgAGG     | + | 5 | 1 | 3 | 0.00 | 1.50 |
| Chr3:54020223-54020245    | 5 | RNA | GGCCGAGGTGCACTACCGGCRNG  | tGtCG-gaCGAaTACgGGGCAAG   | - | 5 | 2 | 3 | 0.00 | 1.50 |
| Chr4:12147030-12147052    | 5 | RNA | GGCCGAGGTGCACTACCGGCRNG  | G-CtCGtGcGgTACtCGCAGG     | - | 5 | 1 | 3 | 0.00 | 1.50 |
| Chr5:168809714-168809736  | 5 | RNA | GGCCGAGGTGCACTACCGGCRNG  | GtGcGAGGc-CgGtTAItGcACTGG | + | 5 | 1 | 3 | 0.00 | 1.50 |
| Chr1:42321946-42321968    | 3 | RNA | GGCCGAGGTGCACTACCGGCRNG  | tGCCGAGGTgG-tTgCtACTGG    | + | 5 | 2 | 3 | 0.00 | 1.50 |
| Chr7:26196527-26196549    | 3 | RNA | GGCCGAGGTGCACTACCGGCRNG  | GAcaG-GtTCACaCgAGcGGG     | + | 5 | 1 | 3 | 0.00 | 1.50 |
| Chr3:183744311-183744333  | 3 | RNA | GGCCGAGGTGCACTACCGGCRNG  | GtCCGAGGgGgGc-gcGcGGG     | + | 5 | 2 | 3 | 0.00 | 1.50 |
| Chr1:2335196-2335218      | 3 | RNA | GGCCGAGGTGCACTACCGGCRNG  | G-aCGGGTGCAGcAAGcGGG      | + | 5 | 1 | 3 | 0.00 | 1.50 |
| Chr9:8133146-8133168      | 5 | RNA | GGCCGAGGTGCACTACCGGCRNG  | GGC-tcGgGACTACCGCTGG      | - | 4 | 2 | 3 | 0.00 | 1.50 |
| Chr1:61110248-61110270    | 3 | RNA | GGCCGAGGTGCACTACCGGCRNG  | GgGc-gGcCAcTCCGGCCGG      | + | 5 | 2 | 3 | 0.00 | 1.50 |
| Chr5:11950623-11950645    | 5 | DNA | GG-CCGAGGTGCACTACCGGCRNG | GGTACGAAGgGcCAcCaCGAAG    | + | 5 | 1 | 3 | 0.00 | 1.50 |
| Chr2:51023454-51023476    | 5 | RNA | GGCCGAGGTGCACTACCGGCRNG  | G-CtCGGGcGAGtACtGGCAGG    | - | 5 | 1 | 3 | 0.00 | 1.50 |
| Chr6:70088222-70088244    | 5 | RNA | GGCCGAGGTGCACTACCGGCRNG  | GtCaCAAG-gACtTcGcCGGG     | + | 4 | 2 | 3 | 0.00 | 1.50 |
| Chr1:43873663-43873685    | 3 | RNA | GGCCGAGGTGCACTACCGGCRNG  | tGgCGAGGTGCAGcAGc-TtGCG   | + | 5 | 2 | 3 | 0.00 | 1.50 |
| Chr1:165740390-16570412   | 3 | RNA | GGCCGAGGTGCACTACCGGCRNG  | G-CtCGGGTGCAGcAAGcGGG     | + | 5 | 1 | 3 | 0.00 | 1.50 |
| Chr5:122722957-122722979  | 3 | DNA | GGCCGAGGTGCACTACCGGCRNG  | GGtCGgTgTtGtTACTACtGGCTAG | + | 5 | 2 | 3 | 0.00 | 1.50 |
| Chr1:150154701-150154723  | 3 | RNA | GGCCGAGGTGCACTACCGGCRNG  | tCaGcGGTGCCTAC-GGtTGG     | + | 5 | 2 | 3 | 0.00 | 1.50 |
| Chr4:9539893-9539915      | 5 | RNA | GGCCGAGGTGCACTACCGGCRNG  | GgGcGGTGCAGTcCGAGAGG      | - | 5 | 1 | 3 | 0.00 | 1.50 |
| Chr5:115739814-115739836  | 5 | RNA | GGCCGAGGTGCACTACCGGCRNG  | GtCGtGgTGCCTAC-GGtTGG     | - | 5 | 2 | 3 | 0.00 | 1.50 |
| Chr2:164461449-164461471  | 5 | RNA | GGCCGAGGTGCACTACCGGCRNG  | GgGcGAGGcGGA-AggGgGAG     | - | 5 | 2 | 3 | 0.00 | 1.50 |
| Chr2:16008853-16008875    | 5 | RNA | GGCCGAGGTGCACTACCGGCRNG  | GGgGAGGTgG-TAItGcGCTGG    | + | 5 | 2 | 3 | 0.00 | 1.50 |
| Chr5:22807892-22807914    | 5 | RNA | GGCCGAGGTGCACTACCGGCRNG  | GGtCAaTcTG-CtACtCGGGAG    | - | 5 | 1 | 3 | 0.00 | 1.50 |
| Chr9:35485798-35485820    | 5 | RNA | GGCCGAGGTGCACTACCGGCRNG  | GtCCGtTtTCAGtTA-GtCCGG    | - | 5 | 2 | 3 | 0.00 | 1.50 |
| Chr2:1775457-1775459      | 3 | RNA | GGCCGAGGTGCACTACCGGCRNG  | GtCaGAGTGC-CtTAcCGAG      | + | 5 | 1 | 3 | 0.00 | 1.50 |
| Chr9:7548854-7548876      | 5 | RNA | GGCCGAGGTGCACTACCGGCRNG  | GtCGAGGtGcTcTcGgGCTGG     | + | 5 | 1 | 3 | 0.00 | 1.50 |
| Chr5:8595965-8595987      | 5 | RNA | GGCCGAGGTGCACTACCGGCRNG  | GtCaGAGcTGCAC-CtCGCAAG    | - | 5 | 2 | 3 | 0.00 | 1.50 |
| Chr1:119836610-119836632  | 5 | RNA | GGCCGAGGTGCACTACCGGCRNG  | GGC-GAGGTGCAGcAGcGAGTAG   | - | 4 | 1 | 3 | 0.00 | 1.50 |
| Chr2:5972866-5972888      | 3 | RNA | GGCCGAGGTGCACTACCGGCRNG  | tGCCGtGcCt-TcCCGGCCGG     | + | 5 | 2 | 3 | 0.00 | 1.50 |
| Chr3:38682391-38682413    | 3 | RNA | GGCCGAGGTGCACTACCGGCRNG  | aGcCAcGTCACTAGc-CAGG      | - | 5 | 2 | 3 | 0.00 | 1.50 |
| Chr6:135776647-135776669  | 5 | DNA | GGC-CGAGGTGCACTACCGGCRNG | GGCTCtGgGgTcCaCAGcCGGCGGG | + | 5 | 2 | 3 | 0.00 | 1.50 |
| Chr6:170124276-170124298  | 3 | RNA | GGCCGAGGTGCACTACCGGCRNG  | GtGcAGcTcGtTCTc-GtCGAG    | - | 5 | 1 | 3 | 0.00 | 1.50 |
| Chr1:18355817-18355839    | 3 | RNA | GGCCGAGGTGCACTACCGGCRNG  | cGcCa-gTcGtTACCGGAGGA     | - | 5 | 2 | 3 | 0.00 | 1.50 |
| Chr9:194442821-194442843  | 5 | RNA | GGCCGAGGTGCACTACCGGCRNG  | tTCCCGtGcCt-TcCCGGCCGG    | - | 5 | 2 | 3 | 0.00 | 1.50 |
| Chr7:174852216-174852238  | 3 | RNA | GGCCGAGGTGCACTACCGGCRNG  | tGcG-HtGgGAGTACtACTGAG    | + | 5 | 2 | 3 | 0.00 | 1.50 |
| Chr8:14945620-14945642    | 3 | RNA | GGCCGAGGTGCACTACCGGCRNG  | Gg-GAGGTGCAGaCcaGAGAG     | - | 4 | 2 | 3 | 0.00 | 1.50 |
| Chr5:2510066-2510088      | 3 | RNA | GGCCGAGGTGCACTACCGGCRNG  | GGC-HtGgGACTACCGCTGG      | + | 4 | 2 | 3 | 0.00 | 1.50 |
| Chr3:5740871-5740893      | 3 | RNA | GGCCGAGGTGCACTACCGGCRNG  | caCAAGTtGcTc-CtCGCCAG     | + | 5 | 1 | 3 | 0.00 | 1.50 |
| Chr9:113641452-113641474  | 5 | RNA | GGCCGAGG-TGACTACCGGCRNG  | GtCCtTtTTCACTACCGGCTGG    | - | 5 | 1 | 3 | 0.00 | 1.50 |
| Chr4:176923490-176923512  | 5 | RNA | GGCCGAGGTGCACTACCGGCRNG  | GGC-AGGcCAcTCCGGCCGG      | - | 4 | 2 | 3 | 0.00 | 1.50 |
| Chr4:211891563-211891585  | 3 | DNA | GGCCGAGGTGCACTACCGGCRNG  | GgaAGAGTtCtCtCAAGaAGG     | + | 5 | 1 | 3 | 0.00 | 1.50 |
| Chr2:124461429-124461451  | 3 | RNA | GGCCGAGGTGCACTACCGGCRNG  | GtGtGA-TCACTcTcGgAGAG     | + | 5 | 2 | 3 | 0.00 | 1.50 |
| Chr2:54091487-54091509    | 3 | RNA | GGCCGAGGTGCACTACCGGCRNG  | cGCCAaAGTGCatAa-GtCGAG    | + | 5 | 2 | 3 | 0.00 | 1.50 |
| Chr1:147825700-147825722  | 3 | RNA | GGCCGAGGTGCACTACCGGCRNG  | GtgggGgGcGGA-ACCgGtCGG    | + | 5 | 2 | 3 | 0.00 | 1.50 |
| Chr10:12874537-12874549   | 3 | RNA | GGCCGAGGTGCACTACCGGCRNG  | GtCaGAGTGC-GACTACCGAG     | + | 5 | 2 | 3 | 0.00 | 1.50 |
| Chr4:29567025-29567047    | 3 | DNA | GGCCGAGGTGCACTACCGGCRNG  | GGcGAGGTTCGtCGaGAGCGCAG   | + | 5 | 2 | 3 | 0.00 | 1.50 |
| Chr6:132897142-132897164  | 3 | RNA | GGCCGAGGTGCACTACCGGCRNG  | GAca-GtTCAGcAcaCGcGGG     | + | 5 | 1 | 3 | 0.00 | 1.50 |
| Chr7:81881669-81881691    | 5 | DNA | GGCCGAGGTGCACTACCGGCRNG  | GgGcGAGtGtGtGTA-CtCGCCGG  | - | 5 | 1 | 3 | 0.00 | 1.50 |
| Chr2:60223890-60223912    | 3 | RNA | GGCCGAGGTGCACTACCGGCRNG  | GGCCG-GTCAcAGcGAGAGG      | - | 5 | 2 | 3 | 0.00 | 1.50 |
| Chr10:112183284-112183306 | 5 | RNA | GGCCGAGGTGCACTACCGGCRNG  | aGcCAAG-gAaAGcCGCGGG      | - | 5 | 2 | 3 | 0.00 | 1.50 |
| Chr9:32186804-32186826    | 5 | DNA | GGCCGAGGTGCACTACCGGCRNG  | cGCCGAGcAtCTCAcCGGCGGG    | + | 5 | 1 | 3 | 0.00 | 1.50 |
| Chr10:88430537-88430559   | 5 | RNA | GGCCGAGGTGCACTACCGGCRNG  | GGC-AGGcCGAGcAcaCGAGAG    | - | 4 | 2 | 3 | 0.00 | 1.50 |
| Chr5:195505904-195505926  | 5 | RNA | GGCCGAGGTGCACTACCGGCRNG  | GaCtCGcGcGCTc-CGGCTGG     | - | 5 | 2 | 3 | 0.00 | 1.50 |
| Chr8:18632562-18632584    | 5 | RNA | GGCCGAGGTGCACTACCGGCRNG  | GtCCtCGcGc-ACTAGcGAGAG    | - | 5 | 2 | 3 | 0.00 | 1.50 |
| Chr7:71727341-17727343    | 3 | RNA | GGCCGAGGTGCACTACCGGCRNG  | cGCCGAGGTGgGgA-TcCGCGGG   | + | 5 | 2 | 3 | 0.00 | 1.50 |
| Chr5:201524946-201524968  | 3 | RNA | GGCCGAGGTGCACTACCGGCRNG  | atCCGtGt-GACTACCGCGGG     | + | 5 | 2 | 3 | 0.00 | 1.50 |
| Chr5:27832865-27832887    | 3 | RNA | GGCCGAGGTGCACTACCGGCRNG  | GGC-AGGcCAcTcCGCCGG       | - | 4 | 2 | 3 | 0.00 | 1.50 |
| Chr1:181021666-181021688  | 3 | RNA | GGCCGAGGTGCACTACCGGCRNG  | GGC-HtGgGACTACCGCTGG      | - | 4 | 2 | 3 | 0.00 | 1.50 |
| Chr8:15550544-15550566    | 3 | RNA | GGCCGAGGTGCACTACCGGCRNG  | G-CGAGGTGCAGgtGgGCGAG     | + | 4 | 1 | 3 | 0.00 | 1.50 |
| Chr4:204248123-204248145  | 3 | RNA | GGCCGAGGTGCACTACCGGCRNG  | cGCCGAGTGCAGc-CGGCTAG     | + | 5 | 2 | 3 | 0.00 | 1.50 |
| Chr1:28789432-28789454    | 5 | RNA | GGCCGAGGTGCACTACCGGCRNG  | GtCCAGGcC-CcACCGCAG       | - | 5 | 2 | 3 | 0.00 | 1.50 |
| Chr8:148618540-148618562  | 3 | RNA | GGCCGAGGTGCACTACCGGCRNG  | GtCCG-gTgCAcCAcCGAGAG     | + | 5 | 2 | 3 | 0.00 | 1.50 |
| Chr1:93501870-93501892    | 3 | RNA | GGCCGAGGTGCACTACCGGCRNG  | GGC-AGGcTGCAGcACtCGCGGG   | - | 4 | 2 | 3 | 0.00 | 1.50 |
| Chr1:10255097-10255119    | 3 | RNA | GGCCGAGGTGCACTACCGGCRNG  | GtCCc-ctGcCAcCGAGAG       | + | 5 | 2 | 3 | 0.00 | 1.50 |
| Chr6:19409954-19409976    | 5 | RNA | GGCCGAGGTGCACTACCGGCRNG  | GGCCGAGGTGCAGcCACTAGAG    | + | 5 | 2 | 3 | 0.00 | 1.50 |
| Chr1:4946356-4946378      | 3 | RNA | GGCCGAGGTGCACTACCGGCRNG  | GAcCGAGcCGAGcCaAGAG       | + | 5 | 1 | 3 | 0.00 | 1.50 |
| Chr8:135074276-135074298  | 3 | RNA | GGCCGAGGTGCACTACCGGCRNG  | GAcCGAGGT-GAGcAcaAGAG     | + | 5 | 1 | 3 | 0.00 | 1.50 |
| Chr6:36494689-36494711    | 3 | RNA | GGCCGAGGTGCACTACCGGCRNG  | GGcAGtGTG-TCTcGcCAGG      | - | 5 | 2 | 3 | 0.00 | 1.50 |
| Chr8:103269032-103269054  | 3 | RNA | GGCCGAGGTGCACTACCGGCRNG  | GcCaGcGGTGA-AagGcGGG      | + | 5 | 1 | 3 | 0.00 | 1.50 |
| Chr8:53054923-53054945    | 3 | RNA | GGCCGAGGTGCACTACCGGCRNG  | G-aCGGGTGCAGcAAGcGGG      | + | 5 | 1 | 3 | 0.00 | 1.50 |
| Chr5:42636727-42636749    | 3 | RNA | GGCCGAGGTGCACTACCGGCRNG  | ctCAAGGTGcGc-gCCGCGAG     | + | 5 | 1 | 3 | 0.00 | 1.50 |
| Chr1:190416490-190416512  | 3 | RNA | GGCCGAGGTGCACTACCGGCRNG  | GGC-tcGgGACTACCGACTGG     | - | 5 | 2 | 3 | 0.00 | 1.50 |
| Chr7:6570760-6570782      | 3 | RNA | GGCCGAGGTGCACTACCGGCRNG  | GGC-tcGtGACTACCGCTGG      | - | 5 | 2 | 3 | 0.00 | 1.50 |
| Chr8:8285005-8285027      | 3 | RNA | GGCCGAGGTGCACTACCGGCRNG  | cGcCGAGGTg-TggCGCTGG      | + | 5 | 2 | 3 | 0.00 | 1.50 |
| Chr1:114525209-114525231  | 3 | RNA | GGCCGAGGTGCACTACCGGCRNG  | GGCCGAGGTGACTACCGGCRNG    | + | 5 | 2 | 3 | 0.00 | 1.50 |
| Chr8:84291806-84291828    | 3 | RNA | GGCCGAGGTGCACTACCGGCRNG  | GtCGcAaTCACTcCGGCTAG      | + | 5 | 1 | 3 | 0.00 | 1.50 |
| Chr1:5666526-5666548      | 5 | DNA | GGC-CGAGGTGCACTACCGGCRNG | GtCTCGgGAGcTcTCCGtTGG     | - | 5 | 1 | 3 | 0.00 | 1.50 |
| Chr5:6292596-6292598      | 3 | X   | GGCCGAGGTGCACTACCGGCRNG  | GtCCGAGGTGCAGcTcGcGGG     | + | 5 | 0 | 3 | 0.00 | 1.50 |
| Chr2:12763024-12763046    | 3 | RNA | GGCCGAGGTGCACTACCGGCRNG  | GtGtCAAGcC-TCTcGcCAG      | + | 5 | 2 | 3 | 0.00 | 1.50 |
| Chr6:172063662-172063684  | 3 | DNA | GGC-CGAGGTGCACTACCGGCRNG | GtCGcGAGcGtTCTCGGCTGG     | - | 5 | 1 | 3 | 0.00 | 1.50 |
| Chr1:190593432-190593454  | 3 | RNA | GGCCGAGGTGCACTACCGGCRNG  | tTCCAGTGCAGTA-IGCCGG      | + | 5 | 2 | 3 | 0.00 | 1.50 |
| Chr2:54183719-54183741    | 3 | DNA | GGC-GAGGTGCACTACCGGCRNG  | GtCTCGgGAGcGtTCTCGGCTGG   | + | 5 | 1 | 3 | 0.00 | 1.50 |
| Chr1:266876252-266876274  | 3 | RNA | GGCCGAGGTGCACTACCGGCRNG  | G-aCGGGTGCAGcAAGcGGGAG    | + | 5 | 1 | 3 | 0.00 | 1.50 |
| Chr5:162335113-162335135  | 5 | DNA | GGCCGAGGTGCACTACCGGCRNG  | GtGtCGAGTTCAGtTcGgCtCCGG  | - | 5 | 2 | 3 | 0.00 | 1.50 |
| Chr4:9694999-9695021      | 3 | RNA | GGCCGAGGTGCACTACCGGCRNG  | tGcGAGTGCAGTcC-TTGG       | + | 5 | 2 | 3 | 0.00 | 1.50 |
| Chr2:11257790-11257812    | 3 | RNA | GGCCGAGGTGCACTACCGGCRNG  | GtCCGAGGcGCA-AcTtGtTGG    | + | 5 | 2 | 3 | 0.00 | 1.50 |
| Chr5:188062070-188062092  | 3 | RNA | GGCCGAGGTGCACTACCGGCRNG  | GGAIAAGTGG-TcTcCAgTGG     | + | 5 | 2 | 3 | 0.00 | 1.50 |
| Chr5:27782968-27782990    | 3 | RNA | GGCCGAGGTGCACTACCGGCRNG  | GgGcGGcCAcCtCCGGCCGG      | - | 5 | 1 | 3 | 0.00 | 1.50 |
| Chr2:124722901-124722923  | 3 | RNA | GGCCGAGGTGCACTACCGGCRNG  | aGcCAcTcCAc-CaCGAG        | + | 5 | 2 | 3 | 0.00 | 1.50 |
| Chr9:105929883-105929905  | 3 | RNA | GGCCGAGGTGCACTACCGGCRNG  | GGAIAAGTGG-TcTcCAgTGG     | + | 5 | 2 | 3 | 0.00 | 1.50 |
| Chr8:42910028-42910050    | 3 | RNA | GGCCGAGGTGCACTACCGGCRNG  | ctG-HtGcGACTcTGGCTGG      | + | 5 | 2 | 3 | 0.00 | 1.50 |
| Chr2:75928676-75928698    | 3 | RNA | GGCCGAGGTGCACTACCGGCRNG  | GtCCAGTGC-CTtAgCAAG       | + | 5 | 2 | 3 | 0.   |      |

|                           |   |     |                           |                          |   |   |   |   |      |      |
|---------------------------|---|-----|---------------------------|--------------------------|---|---|---|---|------|------|
| Chr1:101957580-101957602  | 5 | RNA | GGCCGAGGTGCACTACCGGCRNG   | GgCCGAGGgGACaCC-gTGG     | - | 5 | 2 | 3 | 0.00 | 1.50 |
| Chr10:5790685-5790700     | 3 | RNA | GGCCGAGGTGCACTACCGGCRNG   | GgCCcCGaGgCGaC-CGAGG     | + | 5 | 2 | 3 | 0.00 | 1.50 |
| Chr2:197149932-197149954  | 3 | RNA | GGCCGAGGTGCACTACCGGCRNG   | GGC-tcGGACTACCGCTCG      | + | 4 | 2 | 3 | 0.00 | 1.50 |
| Chr1:214293557-214293579  | 5 | DNA | GG-CCGAGGTGCACTACCGGCRNG  | GGTAcGAGGgCGAgtCCGCAAG   | - | 5 | 1 | 3 | 0.00 | 1.50 |
| Chr4:7797161-7797183      | 3 | RNA | GGCCGAGGTGCACTACCGGCRNG   | GgGgAGG-gAGTAACGGCTGG    | + | 5 | 2 | 3 | 0.00 | 1.50 |
| Chr3:215419943-215419959  | 5 | RNA | GGCCGAGGTGCACTACCGGCRNG   | GGCCGAGGAGTCAcCGCAAG     | + | 5 | 1 | 3 | 0.00 | 1.50 |
| Chr1:99480813-99480835    | 5 | RNA | GGCCGAGGTGCACTACCGGCRNG   | GgCCGtGtCAtTgCC-CAAG     | + | 5 | 2 | 3 | 0.00 | 1.50 |
| Chr5:214299556-214299578  | 5 | RNA | GGCCGAGGTGCACTACCGGCRNG   | GaaAGAGGTGtGCT-CCGGAAG   | - | 5 | 1 | 3 | 0.00 | 1.50 |
| Chr7:13713100-13713122    | 5 | RNA | GGCCGAGGTGCACTACCGGCRNG   | aaCCAGGT-ACcACCaGCCAG    | - | 5 | 2 | 3 | 0.00 | 1.50 |
| Chr1:214344093-214344115  | 5 | RNA | GGCCGAGGTGCACTACCGGCRNG   | tG-GGcGcCaCaCCcCCAG      | + | 5 | 2 | 0 | 2.75 | 1.50 |
| Chr3:150252466-150252488  | 5 | RNA | GGCCGAGGTGCACTACCGGCRNG   | tCCGCA-TacCAcCGCCCGG     | - | 5 | 2 | 0 | 2.75 | 1.38 |
| Chr8:151972397-151972419  | 5 | DNA | GGCCGAGGTGCACTACCGGCRNG   | GgGcAGAGcCGgGgCGGCGGG    | - | 5 | 1 | 0 | 2.75 | 1.38 |
| Chr3:102002994-102003016  | 4 | RNA | GGCCGAGGTGCACTACCGGCRNG   | g-cAGAGGTCAaCaCgGCGGG    | + | 5 | 1 | 0 | 2.75 | 1.38 |
| Chr10:105202045-105202067 | 2 | RNA | GGCCGAGGTGCACTACCGGCRNG   | GgCgCGG-gGcTgCCGCGCG     | + | 5 | 2 | 0 | 2.75 | 1.38 |
| Chr1:90735162-90735184    | 5 | RNA | GGCCGAGGTGCACTACCGGCRNG   | GgGcGAGTCTGc-gCGCGGAG    | - | 5 | 1 | 0 | 2.75 | 1.38 |
| Chr8:38653694-38653716    | 5 | RNA | GGCCGAGGTGCACTACCGGCRNG   | cCCCGGTGcGc-gCGCAAG      | + | 4 | 2 | 0 | 2.75 | 1.38 |
| Chr5:143935928-143935950  | 5 | RNA | GGCCGAGGTGCACTACCGGCRNG   | GGC-AGGcCaCgCtCGCCAG     | + | 4 | 2 | 0 | 2.75 | 1.38 |
| Chr6:124161874-124161896  | 2 | DNA | GCC-CCGAGGTGCACTACCGGCRNG | GtGtGAGGcGAGcTtCCAGAG    | + | 5 | 1 | 0 | 2.75 | 1.38 |
| Chr3:209532291-209532313  | 2 | X   | GGCCGAGGTGCACTACCGGCRNG   | GGCCAGcTCAcTcCtGCTAG     | + | 5 | 0 | 0 | 2.75 | 1.38 |
| Chr9:154883847-154883869  | 5 | RNA | GGCCGAGGTGCACTACCGGCRNG   | GgCCGAGGcGgCG-gCGgTGG    | - | 5 | 2 | 0 | 2.75 | 1.38 |
| Chr4:243949172-243949194  | 4 | RNA | GGCCGAGGTGCACTACCGGCRNG   | GGCC-GGcCtCaCtGCGCGG     | - | 5 | 1 | 0 | 2.75 | 1.38 |
| Chr7:70311146-70311168    | 2 | DNA | GGCCGAGGTGCACTACCGGCRNG   | GGCCGgGtAaTcACCGCGGAG    | + | 5 | 1 | 0 | 2.75 | 1.38 |
| Chr2:286583-286605        | 2 | RNA | GGCCGAGGTGCACTACCGGCRNG   | GGCCgagGtGACTc-GGCGAG    | - | 5 | 1 | 0 | 2.75 | 1.38 |
| Chr1:179744933-179744955  | 3 | DNA | GGCCGAGGTGCACTACCGGCRNG   | cGcCGAGGTGCAcCGGtACCGCGG | - | 5 | 2 | 0 | 2.75 | 1.38 |
| Chr7:9428957-9428989      | 2 | DNA | GGCCGAGGTGCACTACCGGCRNG   | GgGCGAGGcGAGtTcGCTCGTAG  | + | 5 | 2 | 0 | 2.75 | 1.38 |
| Chr2:28642775-28642797    | 2 | DNA | G-CCGAGGTGCACTACCGGCRNG   | G-CCGAGGTGCACTACCGGCRNG  | + | 5 | 2 | 0 | 2.75 | 1.38 |
| Chr5:206571495-206571517  | 4 | RNA | GGCCGAGGTGCACTACCGGCRNG   | GgCCGAGtGc-TtGcCGAGG     | - | 5 | 2 | 0 | 2.75 | 1.38 |
| Chr5:108783657-108783679  | 4 | RNA | GGCCGAGGTGCACTACCGGCRNG   | GtGtAHTGCATcT-GCTGG      | + | 5 | 2 | 0 | 2.75 | 1.38 |
| Chr7:133960443-133960465  | 2 | RNA | GGCCGAGGTGCACTACCGGCRNG   | GcCCGcGgGgCG-gCGCGCG     | + | 5 | 2 | 0 | 2.75 | 1.38 |
| Chr7:117839999-117840021  | 2 | DNA | GGCCGAGGTGCACTACCGGCRNG   | GgGgAGAGGtGAGtCaCCGCTAG  | + | 5 | 1 | 0 | 2.75 | 1.38 |
| Chr5:182293559-182293581  | 2 | RNA | GGCCGAGGTGCACTACCGGCRNG   | G-CAGtCTGCACTCAcCaAGG    | + | 4 | 2 | 0 | 2.75 | 1.38 |
| Chr4:78527600-78527622    | 2 | RNA | GGCCGAGGTGCACTACCGGCRNG   | cCaGAGTcT-CAcCGCGGAG     | + | 5 | 2 | 0 | 2.75 | 1.38 |
| Chr7:111091542-111091564  | 3 | RNA | GGCCGAGGTGCACTACCGGCRNG   | aaCCGAGGTGcTcT-CAGGCTGG  | + | 4 | 1 | 0 | 2.75 | 1.38 |
| Chr7:88825173-88825195    | 4 | RNA | GGCCGAGGTGCACTACCGGCRNG   | GtGatAGGtCGtTcCC-CTAG    | - | 5 | 2 | 0 | 2.75 | 1.38 |
| Chr9:2955821-2955843      | 5 | RNA | GGCCGAGGTGCACTACCGGCRNG   | GGCC-GtAcGAtTcCGCGAGG    | + | 5 | 1 | 0 | 2.75 | 1.38 |
| Chr1:15172759-15172781    | 2 | RNA | GGCCGAGGTGCACTACCGGCRNG   | GcCGAGGtGACT-CCGtGAG     | + | 5 | 1 | 0 | 2.75 | 1.38 |
| Chr4:2035971-2035993      | 2 | RNA | GGCCGAGGTGCACTACCGGCRNG   | GCC-gGcCaCCCGCGCGG       | + | 5 | 2 | 0 | 2.75 | 1.38 |
| Chr5:6589555-6589577      | 3 | RNA | GGCCGAGGTGCACTACCGGCRNG   | GtCCG-gTtGcACtCGCAAG     | - | 5 | 2 | 0 | 2.75 | 1.38 |
| Chr8:56771348-56771370    | 2 | RNA | GGCCGAGGTGCACTACCGGCRNG   | GGCtAGcGcCGAGTtC-GCCAG   | + | 5 | 2 | 0 | 2.75 | 1.38 |
| Chr8:151877558-15187780   | 2 | DNA | GGCCGAGGTGCACTACCGGCRNG   | GtGtGAGCGGgGAGcACCGGCTGG | + | 5 | 2 | 0 | 2.75 | 1.38 |
| Chr3:29061998-29062020    | 2 | RNA | GGCCGAGGTGCACTACCGGCRNG   | GgCGAHTTGCATcA-CGCGG     | + | 5 | 2 | 0 | 2.75 | 1.38 |
| Chr1:41943708-41943730    | 4 | RNA | GGCCGAGGTGCACTACCGGCRNG   | GgCCAAHTGcTtC-GCCGG      | + | 5 | 2 | 0 | 2.75 | 1.38 |
| Chr8:138785201-138785223  | 2 | RNA | GGCCGAGGTGCACTACCGGCRNG   | CaCaAGtTcTCAcCaCGGGAAG   | + | 5 | 1 | 0 | 2.75 | 1.38 |
| Chr5:20511163-20511185    | 2 | RNA | GGCCGAGGTGCACTACCGGCRNG   | GtGtGAtgGAGcAaCC-CCAG    | + | 5 | 2 | 0 | 2.75 | 1.38 |
| Chr6:12954278-12954290    | 5 | RNA | GGCCGAGGTGCACTACCGGCRNG   | GgGcGAGGcGAG-gAaGgCGAG   | + | 5 | 1 | 0 | 2.75 | 1.38 |
| Chr2:2183741875-183741997 | 2 | RNA | GGCCGAGGTGCACTACCGGCRNG   | A-CGgTCCAGTCAcTCAcCGG    | + | 5 | 2 | 0 | 2.75 | 1.38 |
| Chr6:10913184-10913206    | 5 | RNA | GGCCGAGGTGCACTACCGGCRNG   | GtGcGgGtTcGATCA-GtGtGG   | + | 5 | 2 | 0 | 2.75 | 1.38 |
| Chr7:53803649-53803671    | 5 | RNA | GGCCGAGGTGCACTACCGGCRNG   | GGC-HtGgGtACtCCGCTGG     | + | 5 | 2 | 0 | 2.75 | 1.38 |
| Chr4:127578360-127578382  | 3 | X   | GGCCGAGGTGCACTACCGGCRNG   | GaaGAGGTGcTAgCGGCTGG     | + | 5 | 0 | 0 | 2.75 | 1.38 |
| Chr6:157417855-157417877  | 4 | DNA | G-CCGAGGTGCACTACCGGCRNG   | CCCGCGtGtGCTcTcGcGCTGG   | + | 5 | 2 | 0 | 2.75 | 1.38 |
| Chr3:43512456-43512478    | 2 | RNA | GGCCGAGGTGCACTACCGGCRNG   | GG-GAaGgGcAGcAGCGGCTGG   | + | 5 | 2 | 0 | 2.75 | 1.38 |
| Chr2:186668118-186668140  | 2 | RNA | GGCCGAGGTGCACTACCGGCRNG   | GGC-tcGGACTACCGCTGG      | + | 5 | 2 | 0 | 2.75 | 1.38 |
| Chr1:166206945-166206967  | 3 | RNA | GGCCGAGGTGCACTACCGGCRNG   | G-cAGGgTCCGCaCaCgGCGGG   | - | 5 | 1 | 0 | 2.75 | 1.38 |
| Chr1:205588764-205588786  | 5 | RNA | GGCCGAGGTGCACTACCGGCRNG   | agCCGAGGtGcGtCGGCTGG     | - | 5 | 1 | 0 | 2.75 | 1.38 |
| Chr3:11593458-11593480    | 3 | RNA | GGCCGAGGTGCACTACCGGCRNG   | cCCG-GGcGAGtTcCGCGAG     | + | 5 | 1 | 0 | 2.75 | 1.38 |
| Chr1:19783666-19783688    | 3 | RNA | GGCCGAGGTGCACTACCGGCRNG   | GtC-tcTtGACTACCGGCRNG    | + | 5 | 1 | 0 | 2.75 | 1.38 |
| Chr6:170578096-170578118  | 4 | RNA | GGCCGAGGTGCACTACCGGCRNG   | G-cAGAGTCAcCaCgCGGGG     | + | 4 | 1 | 0 | 2.75 | 1.38 |
| Chr1:56665462-56665484    | 5 | RNA | GGCCGAGGTGCACTACCGGCRNG   | GgGc-AGGcCGAGcCaCGCGG    | + | 5 | 2 | 0 | 2.75 | 1.38 |
| Chr6:5030952-5030974      | 2 | RNA | GGCCGAGGTGCACTACCGGCRNG   | GaCCGAGGAGcAaAgg-GCCAG   | + | 5 | 2 | 0 | 2.75 | 1.38 |
| Chr8:133099564-133099586  | 3 | DNA | GGCCGAGGTGCACTACCGGCRNG   | GgGcAGAtTcTcTcCCAGGCGCGG | + | 5 | 2 | 0 | 2.75 | 1.38 |
| Chr5:24782159-24782181    | 3 | RNA | GGCCGAGGTGCACTACCGGCRNG   | GGC-tcGGACTACCGCTGG      | + | 5 | 2 | 0 | 2.75 | 1.38 |
| Chr2:152935761-152935783  | 3 | RNA | GGCCGAGGTGCACTACCGGCRNG   | agC-AGGcGACTCCGGAAGG     | - | 5 | 2 | 0 | 2.75 | 1.38 |
| Chr4:13285912-13285934    | 3 | RNA | GGCCGAGGTGCACTACCGGCRNG   | G-cAGGgTCCGCaCaCgGCGGG   | - | 5 | 1 | 0 | 2.75 | 1.38 |
| Chr7:171631366-171631388  | 3 | RNA | GGCCGAGGTGCACTACCGGCRNG   | GgGgAGGTGAT-CCGGAAT      | + | 5 | 2 | 0 | 2.75 | 1.38 |
| Chr5:12904522-12904544    | 4 | RNA | GGCCGAGGTGCACTACCGGCRNG   | GgGcGtGCTCGAGgAaCaC-CGGG | - | 5 | 1 | 0 | 2.75 | 1.38 |
| Chr8:99323920-99323942    | 4 | RNA | GGCCGAGGTGCACTACCGGCRNG   | aaCCGAGGAGGtTcAGGtGAGG   | + | 5 | 1 | 0 | 2.75 | 1.38 |
| Chr2:44189994-44190016    | 4 | RNA | GGCCGAGGTGCACTACCGGCRNG   | GgGcGgGtTcGcT-CCGGAAG    | + | 5 | 1 | 0 | 2.75 | 1.38 |
| Chr8:101358178-101358200  | 3 | RNA | GGCCGAGGTGCACTACCGGCRNG   | GcTcAGtGcGAC-CCGtGAG     | + | 5 | 1 | 0 | 2.75 | 1.38 |
| Chr6:44061726-44061748    | 3 | RNA | GGCCGAGGTGCACTACCGGCRNG   | GcG-GAGGTCAcCaCgGgTAG    | + | 5 | 1 | 0 | 2.75 | 1.38 |
| Chr8:140926581-140926603  | 3 | RNA | GGCCGAGGTGCACTACCGGCRNG   | GcCaAGAGcA-CTAgGgGgGAG   | + | 5 | 2 | 0 | 2.75 | 1.38 |
| Chr1:35686356-35686378    | 3 | RNA | GGCCGAGGTGCACTACCGGCRNG   | GCaGAGG-GcCtACCGcCGG     | + | 4 | 1 | 0 | 2.75 | 1.38 |
| Chr1:251452902-251452924  | 2 | DNA | GGCCGAGGTGCACTACCGGCRNG   | GGCCGAGGtCG-ACTACCGGCRNG | + | 5 | 1 | 0 | 2.75 | 1.38 |
| Chr5:153755342-153755364  | 2 | RNA | GGCCGAGGTGCACTACCGGCRNG   | GcCGAGGtGG-TtGcGAGAG     | + | 5 | 2 | 0 | 2.75 | 1.38 |
| Chr4:71622045-71622067    | 4 | RNA | GGCCGAGGTGCACTACCGGCRNG   | CaCCGAGG-cAGcAaCaagAGG   | - | 5 | 1 | 0 | 2.75 | 1.38 |
| Chr5:14166142-14166164    | 2 | RNA | GGCCGAGGTGCACTACCGGCRNG   | Gg-AGGTGcGcGAGGAGTAG     | + | 5 | 2 | 0 | 2.75 | 1.38 |
| Chr10:129635891-12963603  | 4 | RNA | GGCCGAGGTGCACTACCGGCRNG   | GcCGAGGTGCACTACCGGCRNG   | + | 5 | 2 | 0 | 2.75 | 1.38 |
| Chr7:26792873-26792895    | 3 | RNA | GGCCGAGGTGCACTACCGGCRNG   | GGC-AGGcGAGcAaCaGAGG     | + | 5 | 2 | 0 | 2.75 | 1.38 |
| Chr1:138278932-138278954  | 5 | RNA | GGCCGAGGTGCACTACCGGCRNG   | cCCCGcTcGcTcACCG-CCGG    | + | 5 | 1 | 0 | 2.75 | 1.38 |
| Chr2:22260813-22260835    | 5 | RNA | GGCCGAGGTGCACTACCGGCRNG   | GGC-tcGGACTACCGCTGG      | + | 4 | 2 | 0 | 2.75 | 1.38 |
| Chr2:182782102-182782124  | 5 | RNA | GGCCGAGGTGCACTACCGGCRNG   | GcGcGAGGcGACT-AGgAGG     | + | 5 | 2 | 0 | 2.75 | 1.38 |
| Chr2:149090399-149090421  | 2 | RNA | GGCCGAGGTGCACTACCGGCRNG   | GGC-tcGGACTACCGCTGG      | + | 5 | 2 | 0 | 2.75 | 1.38 |
| Chr3:810172-810194        | 3 | RNA | GGCCGAGGTGCACTACCGGCRNG   | cCtGCA-TCAcTcaGCGCAG     | + | 5 | 2 | 0 | 2.75 | 1.38 |
| Chr1:238778460-238778482  | 3 | RNA | GGCCGAGGTGCACTACCGGCRNG   | cCaGAGtTcTtATcC-CCAG     | - | 5 | 2 | 0 | 2.75 | 1.38 |
| Chr5:174122720-174122742  | 3 | RNA | GGCCGAGGTGCACTACCGGCRNG   | GcGcAGGtGG-TtGcGAGAG     | + | 5 | 2 | 0 | 2.75 | 1.38 |
| Chr6:4549881-4549903      | 5 | RNA | GGCCGAGGTGCACTACCGGCRNG   | GGC-AaAtTCAGcGcCGAGAG    | + | 5 | 1 | 0 | 2.75 | 1.38 |
| Chr8:11223615-11223637    | 5 | RNA | GGCCGAGGTGCACTACCGGCRNG   | GcCGAGGAGG-TcGATcCGAG    | + | 5 | 2 | 0 | 2.75 | 1.38 |
| Chr2:26206648-26206670    | 5 | RNA | GGCCGAGGTGCACTACCGGCRNG   | GtGcGgGtTcGcT-cCGCCGG    | + | 5 | 2 | 0 | 2.75 | 1.38 |
| Chr1:12003580-12003602    | 5 | RNA | GGCCGAGGTGCACTACCGGCRNG   | GtGtCG-GTCAcTcCGGAG      | + | 5 | 1 | 0 | 2.75 | 1.38 |
| Chr9:124681722-124681744  | 3 | RNA | GGCCGAGGTGCACTACCGGCRNG   | GcTcAGGtAgAaG-GGcAG      | - | 5 | 2 | 0 | 2.75 | 1.38 |
| Chr4:18429693-18429715    | 2 | RNA | GGCCGAGGTGCACTACCGGCRNG   | G-CaAGGTCAaTCAcGAGAG     | + | 5 | 1 | 0 | 2.75 | 1.38 |
| Chr1:254308288-254308300  | 5 | RNA | GGCCGAGGTGCACTACCGGCRNG   | GGCCtCaGcG-TtCCGCGG      | + | 5 | 2 | 0 | 2.75 | 1.38 |
| Chr6:171867766-171867788  | 5 | RNA | GGCCGAGGTGCACTACCGGCRNG   | GaC-AGGTGcAGgAaCgCGAG    | + | 5 | 1 | 0 | 2.75 | 1.38 |
| Chr2:51291025-51291047    | 3 | RNA | GGCCGAGGTGCACTACCGGCRNG   | G-cAGGgTCCGCaCaCgGCGGG   | - | 5 | 1 | 0 | 2.75 | 1.38 |
| Chr1:173336304-173336326  | 2 | RNA | GGCCGAGGTGCACTACCGGCRNG   | GgCgGAGGcCGAg-GCGAG      | + | 5 | 2 | 0 | 2.75 | 1.38 |
| Chr8:169979790-169979792  | 4 | RNA | GGCCGAGGTGCACTACCGGCRNG   | GGCt-GGtGgGAGcCGAGAG     | + | 5 | 1 | 0 | 2.75 | 1.38 |
| Chr1:234197394-234197416  | 3 | RNA | GGCCGAGGTGCACTACCGGCRNG   | G-cAGGgTCCGCaCaCgGCGGG   | - | 5 | 1 | 0 | 2.75 | 1.38 |
| Chr4:164613100-164613122  | 2 | RNA | GGCCGAGGTGCACTACCGGCRNG   | GtCCtGc-gAItaCCCGCAGG    | + | 5 | 2 | 0 | 2.75 | 1.38 |
| Chr2:64910493-64910515    | 5 | RNA | GGCCGAGGTGCACTACCGGCRNG   | GGCC-GTcGtCAcGCGGGG      | + | 5 | 1 | 0 | 2.75 | 1.38 |
| Chr10:114264179-114264201 | 5 | RNA | GGCCGAGGTGCACTACCGGCRNG   | GGC-tcGGACTACCGCTGG      | + | 4 | 2 | 0 | 2.75 | 1.38 |
| Chr10:65497996-65498018   | 5 | RNA | GGCCGAGGTGCACTACCGGCRNG   | GtCCG-gTtGcACCGcAAG      | + | 5 | 2 | 0 | 2.75 | 1.38 |
| Chr3:80245059-80245081    | 3 | RNA | GGCCGAGGTGCACTACCGGCRNG   | tCCAGGTc-ACTAaGtCAG      | - | 5 | 1 | 0 | 2.75 | 1.38 |
| Chr4:142823194-142823216  | 2 | RNA | GGCCGAGGTGCACTACCGGCRNG   | cG-AGGtTCCAGcAGcCGGG     | + | 5 | 2 | 0 | 2.75 | 1.38 |
| Chr1:182443334-182443356  | 3 | RNA | GGCCGAGGTGCACTACCGGCRNG   | G-CGAGGcGAGaAGcGAGAG     |   |   |   |   |      |      |

|                           |   |     |                           |                          |   |   |   |   |      |      |
|---------------------------|---|-----|---------------------------|--------------------------|---|---|---|---|------|------|
| Chr10:75795316-75795338   | 3 | RNA | GGCCGAGGTCGACTACCGGCGNRG  | GcCGAGccGAC-CCGCAAG      | + | 5 | 2 | 0 | 2.75 | 1.38 |
| Chr5:133413000-133413022  | 4 | RNA | GGCCGAGGTCGACTACCGGCGNRG  | GtgGAGGcGCACTAACC-CCGG   | - | 5 | 2 | 0 | 2.75 | 1.38 |
| Chr4:243565738-243565760  | 2 | RNA | GGCCGAGGTCGACTACCGGCGNRG  | GGCCGAGGTCGACTC-GGCGAG   | - | 5 | 1 | 0 | 2.75 | 1.38 |
| Chr8:38783048-38783070    | 4 | RNA | GGCCGAGGTCGACTACCGGCGNRG  | GtgCGAHC-CGcTgCCGCGCGG   | + | 5 | 1 | 0 | 2.75 | 1.38 |
| Chr9:133812211-133812233  | 4 | RNA | GGCCGAGGTCGACTACCGGCGNRG  | G-aCGcGGTCGCAaCaGpGCGGG  | + | 5 | 1 | 0 | 2.75 | 1.38 |
| Chr2:16595188-16595210    | 5 | RNA | GGCCGAGGTCGACTACCGGCGNRG  | GGcCAAGG-GACTAAGcTCTGG   | + | 5 | 2 | 0 | 2.75 | 1.38 |
| Chr7:64593047-64593069    | 3 | RNA | GGCCGAGGTCGACTACCGGCGNRG  | GCcCAAGccGCACTC-CCGAG    | + | 5 | 2 | 0 | 2.75 | 1.38 |
| Chr2:50610977-50610999    | 2 | RNA | GGCCGAGGTCGACTACCGGCGNRG  | GtCGCGAGGTC-TagcCcCGGG   | + | 4 | 2 | 0 | 2.75 | 1.38 |
| Chr5:171048843-171048865  | 3 | RNA | GGCCGAGGTCGACTACCGGCGNRG  | GcCGcAGG-GACTCAgTCTGG    | - | 5 | 2 | 0 | 2.75 | 1.38 |
| Chr3:129227775-129227797  | 5 | RNA | GGCCGAGGTCGACTACCGGCGNRG  | GAaCGAG-CGaATCaGgTAG     | - | 5 | 2 | 0 | 2.75 | 1.38 |
| Chr1:245550493-245550515  | 2 | RNA | GGCCGAGGTCGACTACCGGCGNRG  | GGC-AGGcCAAGcCCGCGGG     | + | 5 | 2 | 0 | 2.75 | 1.38 |
| Chr2:45460337-45460359    | 2 | RNA | GGCCGAGGTCGACTACCGGCGNRG  | GgGcGAGGc-CgAaGgGCGAG    | + | 5 | 2 | 0 | 2.75 | 1.38 |
| Chr5:222727445-222727467  | 2 | RNA | GGCCGAGGTCGACTACCGGCGNRG  | GGcAGcGGTCGAC-gcGgCGCG   | + | 5 | 1 | 0 | 2.75 | 1.38 |
| Chr4:188318694-188318716  | 3 | RNA | GGCCGAGGTCGACTACCGGCGNRG  | G-aCGcGGTCGCAaCaGpGCGGG  | - | 5 | 1 | 0 | 2.75 | 1.38 |
| Chr3:201853421-201853443  | 4 | RNA | GGCCGAGGTCGACTACCGGCGNRG  | aGCCcGTCGACT-CCGCTGG     | - | 5 | 2 | 0 | 2.75 | 1.38 |
| Chr8:78781894-78781916    | 4 | X   | GGCCGAGGTCGACTACCGGCGNRG  | GGAaGAGGTGcCTAGcGCTGG    | + | 5 | 0 | 1 | 1.65 | 1.33 |
| Chr5:28634198-28634220    | 5 | RNA | GGCCGAGGTCGACTACCGGCGNRG  | GGcCGcGTCAGcCT-CCGCGAG   | - | 5 | 1 | 1 | 1.65 | 1.33 |
| Chr3:198373903-198373925  | 4 | RNA | GGCCGAGGTCGACTACCGGCGNRG  | G-aCGcGGcAGGcGcACCGCGGG  | + | 5 | 1 | 1 | 1.65 | 1.33 |
| Chr3:211808730-211808752  | 2 | RNA | GGCCGAGGTCGACTACCGGCGNRG  | tGcCGAGTCa-1ACCGCGGG     | + | 4 | 2 | 1 | 1.65 | 1.33 |
| Chr1:122460244-122460266  | 2 | RNA | GGCCGAGGTCGACTACCGGCGNRG  | GAaCAAGGAAcCT-CCGCGAG    | - | 5 | 1 | 2 | 0.55 | 1.28 |
| Chr6:20347024-20347046    | 3 | DNA | GGC-CGAGGTCGACTACCGGCGNRG | GcCTCGGAGGTCCTCCGCTGG    | + | 5 | 1 | 2 | 0.55 | 1.28 |
| Chr5:11477335-11477357    | 4 | RNA | GGCCGAGGTCGACTACCGGCGNRG  | G-aCGcGGTCGACpGcGCGGG    | + | 5 | 1 | 2 | 0.55 | 1.28 |
| Chr1:91102570-91102592    | 4 | RNA | GGCCGAGGTCGACTACCGGCGNRG  | GGCCGAGGTCGACT-CCGCGGG   | - | 5 | 2 | 0 | 2.20 | 1.10 |
| Chr4:40308772-40308794    | 4 | RNA | GGCCGAGGTCGACTACCGGCGNRG  | GgGcGAAGGTCGACT-CCGCGGG  | - | 5 | 2 | 0 | 2.20 | 1.10 |
| Chr1:141832898-141832920  | 3 | RNA | GGCCGAGGTCGACTACCGGCGNRG  | GtCCCGAGT-CTTCCGCTGG     | + | 5 | 2 | 0 | 2.20 | 1.10 |
| Chr10:25201954-25201976   | 3 | RNA | GGCCGAGGTCGACTACCGGCGNRG  | G-aCGcGGTCGCAaCaGpGCGGG  | + | 5 | 1 | 0 | 2.20 | 1.10 |
| Chr7:70569246-70569268    | 3 | DNA | GGC-CGAGGTCGACTACCGGCGNRG | GGcCTCGGAGGTCaCaCGCGCGGG | - | 5 | 2 | 0 | 2.20 | 1.10 |
| Chr5:21690342-21690364    | 3 | RNA | GGCCGAGGTCGACTACCGGCGNRG  | GgGcCG-AGcCaCTCCGCGGG    | - | 5 | 1 | 0 | 2.20 | 1.10 |
| Chr5:84347854-84347876    | 3 | X   | GGCCGAGGTCGACTACCGGCGNRG  | GGAaGAGTCGcGcAGCGGAGG    | - | 5 | 0 | 0 | 2.20 | 1.10 |
| Chr1:11548034-11548056    | 4 | RNA | GGCCGAGGTCGACTACCGGCGNRG  | GgGcGAGG-GcTACCGCGGG     | + | 4 | 1 | 0 | 2.20 | 1.10 |
| Chr7:48721400-48721422    | 4 | RNA | GGCCGAGGTCGACTACCGGCGNRG  | cG-GAGGgAaTACcCGCTGG     | + | 5 | 2 | 0 | 2.20 | 1.10 |
| Chr8:23077540-23077562    | 5 | RNA | GGCCGAGGTCGACTACCGGCGNRG  | GGAaGATcTG-1AgaAGCGAG    | - | 5 | 2 | 0 | 2.20 | 1.10 |
| Chr7:114036794-114036816  | 3 | DNA | GGC-CGAGGTCGACTACCGGCGNRG | GcCGAGGAGGTCCTCCGCTGG    | + | 4 | 1 | 0 | 2.20 | 1.10 |
| Chr3:20538837-20538859    | 2 | RNA | GGCCGAGGTCGACTACCGGCGNRG  | GtCCG-GTgCAaCCGGAAG      | - | 5 | 2 | 0 | 2.20 | 1.10 |
| Chr4:202411281-202411303  | 3 | RNA | GGCCGAGGTCGACTACCGGCGNRG  | GtCCG-GTgCAaCCGGAAG      | + | 5 | 2 | 0 | 2.20 | 1.10 |
| Chr8:80753863-80753885    | 4 | RNA | GGCCGAGGTCGACTACCGGCGNRG  | GcC-aGCGcGACTCCGCGGG     | + | 4 | 2 | 0 | 2.20 | 1.10 |
| Chr5:203358148-203358170  | 2 | RNA | GGCCGAGGTCGACTACCGGCGNRG  | GGAaGAGTCG-TCaCGATGG     | - | 5 | 2 | 0 | 2.20 | 1.10 |
| Chr7:103576040-103576062  | 4 | RNA | GGCCGAGGTCGACTACCGGCGNRG  | aGcAGGTCCTT-CCGCGAG      | - | 4 | 2 | 0 | 2.20 | 1.10 |
| Chr6:139959918-139959940  | 5 | RNA | GGCCGAGGTCGACTACCGGCGNRG  | GGC-tcGcGACTCCGCTGG      | + | 5 | 2 | 0 | 2.20 | 1.10 |
| Chr7:62338175-62338197    | 5 | RNA | GGCCGAGGTCGACTACCGGCGNRG  | GcCGAGGATGAcCa-CCGG      | + | 5 | 2 | 0 | 2.20 | 1.10 |
| Chr1:121232818-121232840  | 5 | RNA | GGCCGAGGTCGACTACCGGCGNRG  | GtCGAG-CCaTgGCGCGGG      | - | 5 | 2 | 0 | 2.20 | 1.10 |
| Chr5:153362641-153362663  | 2 | RNA | GGCCGAGGTCGACTACCGGCGNRG  | GtCGAGGAGa-CAaAGcGCGAG   | + | 5 | 2 | 0 | 2.20 | 1.10 |
| Chr2:10589567-10589589    | 4 | RNA | GGCCGAGGTCGACTACCGGCGNRG  | cGgGAGGAGa-CAaCGcGCGGG   | + | 5 | 2 | 0 | 2.20 | 1.10 |
| Chr3:181915416-181915438  | 3 | RNA | GGCCGAGGTCGACTACCGGCGNRG  | GGC-tcGcGACTCCGCGGG      | - | 4 | 2 | 0 | 2.20 | 1.10 |
| Chr8:160902460-160902482  | 3 | RNA | GGCCGAGGTCGACTACCGGCGNRG  | GcCGAGGTCGcGpAGcGCGGG    | - | 5 | 1 | 0 | 2.20 | 1.10 |
| Chr2:82786509-82786531    | 3 | RNA | GGCCGAGGTCGACTACCGGCGNRG  | GcCGAGGTCGAGaAGGAGGAG    | + | 5 | 2 | 0 | 2.20 | 1.10 |
| Chr10:60737498-60737520   | 3 | RNA | GGCCGAGGTCGACTACCGGCGNRG  | caCCAGG-GAATCAcGCAAG     | + | 5 | 2 | 0 | 2.20 | 1.10 |
| Chr4:83929226-83929248    | 3 | RNA | GGCCGAGGTCGACTACCGGCGNRG  | HTCCGAGTCCGcCgC-CCGG     | - | 4 | 2 | 0 | 2.20 | 1.10 |
| Chr1:15964999-15965021    | 4 | RNA | GGCCGAGGTCGACTACCGGCGNRG  | GcCAaGAG-GcGgAGCGAAG     | - | 5 | 1 | 0 | 2.20 | 1.10 |
| Chr4:45643856-45643878    | 5 | RNA | GGCCGAGGTCGACTACCGGCGNRG  | GcGcGAGGcGCA-AGcGgCGGG   | + | 4 | 2 | 0 | 2.20 | 1.10 |
| Chr3:23439613-23439635    | 2 | RNA | GGCCGAGGTCGACTACCGGCGNRG  | GtCCG-GTgCAaCCGGAAG      | - | 5 | 2 | 0 | 2.20 | 1.10 |
| Chr2:146215252-146215274  | 4 | RNA | GGCCGAGGTCGACTACCGGCGNRG  | GAaCCAGTCaCaCCG-CCAG     | - | 5 | 1 | 0 | 2.20 | 1.10 |
| Chr2:15178958-15178980    | 5 | RNA | GGCCGAGGTCGACTACCGGCGNRG  | G-CCGcGGTCGcCTcGgGAGG    | + | 5 | 1 | 0 | 2.20 | 1.10 |
| Chr2:53620626-53620648    | 4 | DNA | GGCCGA-GGTGACTACCGGCGNRG  | GgCGAGGTCGcCTcGgGAGG     | - | 5 | 1 | 0 | 2.20 | 1.10 |
| Chr2:10155183-10155205    | 2 | DNA | GGCCGAGGTCGACTACCGGCGNRG  | GGcCGAGTCGcCTcGgGAGG     | - | 5 | 2 | 0 | 2.20 | 1.10 |
| Chr2:2162836192-216283624 | 5 | RNA | GGCCGAGGTCGACTACCGGCGNRG  | GGC-aGCGcGACTCCGCGGG     | + | 4 | 2 | 0 | 2.20 | 1.10 |
| Chr1:196702091-196702113  | 6 | DNA | GGC-CGAGGTCGACTACCGGCGNRG | cGcCAAGGTCGcCTcCaGcCAGG  | - | 5 | 2 | 0 | 2.20 | 1.10 |
| Chr3:206541231-206541253  | 4 | RNA | GGCCGAGGTCGACTACCGGCGNRG  | GGC-tcGcGACTCCGCGGG      | - | 5 | 2 | 0 | 2.20 | 1.10 |
| Chr6:17339644-17339666    | 2 | DNA | GGCCGAGGTCGACTACCGGCGNRG  | HTCCGAAGTCGACCGTCGcGgGAG | - | 5 | 2 | 0 | 2.20 | 1.10 |
| Chr1:116457339-116457361  | 4 | RNA | GGCCGAGGTCGACTACCGGCGNRG  | GcCAaGcATgCT-CCGCGGG     | - | 5 | 2 | 0 | 2.20 | 1.10 |
| Chr10:110164474-110164496 | 5 | RNA | GGCCGAGGTCGACTACCGGCGNRG  | GGCCAGGTCGAGgAG-ATGG     | - | 5 | 2 | 0 | 2.20 | 1.10 |
| Chr5:98942464-98942486    | 5 | RNA | GGCCGAGGTCGACTACCGGCGNRG  | GcCGAGGAGGcGT-CAaGAGG    | - | 5 | 2 | 0 | 2.20 | 1.10 |
| Chr8:64697155-64697177    | 5 | RNA | GGCCGAGGTCGACTACCGGCGNRG  | GgGcCGGTCGcCT-CCGGAAG    | - | 5 | 1 | 0 | 2.20 | 1.10 |
| Chr9:70823798-70823820    | 4 | RNA | GGCCGAGGTCGACTACCGGCGNRG  | GcCAaHG-CGcCAaCCGCGAAG   | + | 5 | 1 | 0 | 2.20 | 1.10 |
| Chr6:42712995-42713017    | 4 | RNA | GGCCGAGGTCGACTACCGGCGNRG  | GtCCGAGaccCTA-GCCAG      | - | 5 | 2 | 0 | 2.20 | 1.10 |
| Chr4:16863378-16863394    | 4 | RNA | GGCCGAGGTCGACTACCGGCGNRG  | GcCGAGGTCGAGaAGGAGGAG    | + | 5 | 2 | 0 | 2.20 | 1.10 |
| Chr2:166306364-166306386  | 3 | RNA | GGCCGAGGTCGACTACCGGCGNRG  | GgGcGcGTCGCACTc-CAaGAG   | + | 5 | 1 | 0 | 2.20 | 1.10 |
| Chr4:36465107-36465129    | 4 | RNA | GGCCGAGGTCGACTACCGGCGNRG  | GtCCGcGcT-GA1TCAAGGAG    | + | 5 | 1 | 0 | 2.20 | 1.10 |
| Chr3:19013786-19013808    | 2 | RNA | GGCCGAGGTCGACTACCGGCGNRG  | GcCGC-GGcCATcCGCGGG      | + | 5 | 2 | 0 | 2.20 | 1.10 |
| Chr8:17355957-17355979    | 4 | RNA | GGCCGAGGTCGACTACCGGCGNRG  | aGCCAGGAGGTC-CCGcAG      | + | 5 | 2 | 0 | 2.20 | 1.10 |
| Chr8:40897227-40897249    | 4 | RNA | GGCCGAGGTCGACTACCGGCGNRG  | cGCCAGATCG-1AgCGGGG      | + | 5 | 2 | 0 | 2.20 | 1.10 |
| Chr9:68573271-68573293    | 3 | RNA | GGCCGAGGTCGACTACCGGCGNRG  | GGAaCGAGTCG-TCaGATGG     | + | 5 | 2 | 0 | 2.20 | 1.10 |
| Chr2:3354111-3354133      | 3 | RNA | GGCCGAGGTCGACTACCGGCGNRG  | cGCCAGGgGAGaAGC-GCTGG    | + | 5 | 2 | 0 | 2.20 | 1.10 |
| Chr3:182620682-182620704  | 3 | RNA | GGCCGAGGTCGACTACCGGCGNRG  | GGC-tcGcGACTCCGCGGG      | + | 4 | 2 | 0 | 2.20 | 1.10 |
| Chr1:13638939-13638961    | 4 | RNA | GGCCGAGGTCGACTACCGGCGNRG  | GtCCcGATcACT-CCGCGAG     | - | 5 | 2 | 0 | 2.20 | 1.10 |
| Chr6:13318535-13318557    | 3 | RNA | GGCCGAGGTCGACTACCGGCGNRG  | GGCCGAGGTCGACTACCGGCGNRG | + | 5 | 1 | 0 | 2.20 | 1.10 |
| Chr7:7752969-7752991      | 5 | RNA | GGCCGAGGTCGACTACCGGCGNRG  | GcGcAGcCTcACT-CAaCGAG    | + | 5 | 1 | 0 | 2.20 | 1.10 |
| Chr6:78565157-78565179    | 5 | RNA | GGCCGAGGTCGACTACCGGCGNRG  | GtGHAAGT-1AaTACGCTGG     | + | 5 | 2 | 0 | 2.20 | 1.10 |
| Chr2:140635144-140635166  | 4 | RNA | GGCCGAGGTCGACTACCGGCGNRG  | GGAaCAaGcGACTA-tGATAG    | + | 5 | 2 | 0 | 2.20 | 1.10 |
| Chr2:68204360-68204382    | 2 | RNA | GGCCGAGGTCGACTACCGGCGNRG  | GAaCGAGGAGcGcCT-cGgGATGG | + | 5 | 1 | 0 | 2.20 | 1.10 |
| Chr9:134814353-134814375  | 4 | RNA | GGCCGAGGTCGACTACCGGCGNRG  | GtGtGgGTCGcCT-CCGgGAG    | + | 5 | 2 | 0 | 2.20 | 1.10 |
| Chr7:90520160-90520182    | 2 | RNA | GGCCGAGGTCGACTACCGGCGNRG  | accCGAGTCGAATAC-CCGG     | + | 5 | 2 | 0 | 2.20 | 1.10 |
| Chr10:9015298-90152620    | 5 | RNA | GGCCGAGGTCGACTACCGGCGNRG  | GgGgAGAGcGA-AGcGGCGGG    | - | 5 | 2 | 0 | 2.20 | 1.10 |
| Chr2:224205374-224205396  | 5 | RNA | GGCCGAGGTCGACTACCGGCGNRG  | GgGcG-GGcCAaCCcCGCGAG    | + | 5 | 1 | 0 | 2.20 | 1.10 |
| Chr2:169614276-169614298  | 4 | RNA | GGCCGAGGTCGACTACCGGCGNRG  | G-aCGcGGTCGCAaCaGpGCGGG  | + | 5 | 1 | 0 | 2.20 | 1.10 |
| Chr4:5975451-5975473      | 2 | RNA | GGCCGAGGTCGACTACCGGCGNRG  | G-aCGcGGTCGCAaCaGpGCGGG  | + | 5 | 1 | 0 | 2.20 | 1.10 |
| Chr8:36653470-36653492    | 3 | DNA | GGC-CGAGGTCGACTACCGGCGNRG | GtCCGAGGTCGCTcCaGCTGG    | - | 5 | 1 | 0 | 2.20 | 1.10 |
| Chr1:118844117-118844139  | 3 | DNA | GGCCGAGGTCGACTACCGGCGNRG  | GtGAGAGGTCGACTAGcCGGG    | + | 5 | 1 | 0 | 2.20 | 1.10 |
| Chr2:84659413-84659435    | 2 | RNA | GGCCGAGGTCGACTACCGGCGNRG  | GcCGGAGGcGA-AggGgGAG     | + | 5 | 2 | 0 | 2.20 | 1.10 |
| Chr6:71113471-71113493    | 4 | RNA | GGCCGAGGTCGACTACCGGCGNRG  | GGCCAGaTgGA-1AcTGAAG     | + | 5 | 2 | 0 | 2.20 | 1.10 |
| Chr4:38243720-38243742    | 2 | RNA | GGCCGAGGTCGACTACCGGCGNRG  | GGAaCAAGTCG-TCaGATGG     | + | 5 | 2 | 0 | 2.20 | 1.10 |
| Chr1:121532612-121532634  | 4 | RNA | GGCCGAGGTCGACTACCGGCGNRG  | GtCCAGGTCGAaCaCC-HGGI    | - | 5 | 2 | 0 | 2.20 | 1.10 |
| Chr9:81920425-81920447    | 2 | RNA | GGCCGAGGTCGACTACCGGCGNRG  | GtGtGTCGACTAC-GGGCAG     | + | 5 | 1 | 0 | 2.20 | 1.10 |
| Chr4:183774110-183774132  | 4 | RNA | GGCCGAGGTCGACTACCGGCGNRG  | GGCCGA-TAgcCgCgCCCGG     | + | 5 | 2 | 0 | 2.20 | 1.10 |
| Chr7:15634200-15634222    | 4 | RNA | GGCCGAGGTCGACTACCGGCGNRG  | GGAaCAaGcGACTAC-gATAG    | - | 4 | 2 | 0 | 2.20 | 1.10 |
| Chr1:42844399-42844411    | 4 | RNA | GGCCGAGGTCGACTACCGGCGNRG  | G-aCGAGGTCGAGaAGpGCGGG   | + | 4 | 1 | 0 | 2.20 | 1.10 |
| Chr5:50647306-50647328    | 3 | RNA | GGCCGAGGTCGACTACCGGCGNRG  | GGAaCAAGGgG-cAaCGCGAAG   | + | 5 | 2 | 0 | 2.20 | 1.10 |
| Chr4:219504700-219504722  | 4 | RNA | GGCCGAGGTCGACTACCGGCGNRG  | taCCG-GTCAaCaCaGcCAGG    | - | 4 | 2 | 0 | 2.20 | 1.10 |
| Chr9:138160150-138160172  | 5 | RNA | GGCCGAGGTCGACTACCGGCGNRG  | GAGGA-1TgACTAGCTGG       | + | 4 | 2 | 0 | 2.20 | 1.10 |
| Chr2:18023142-18023164    | 3 | RNA | GGCCGAGGTCGACTACCGGCGNRG  | GcCGcGTCGAcCTc-CCAG      | + | 5 | 2 | 0 | 2.20 | 1.10 |
| Chr2:4196458-4196480      | 3 | RNA | GGCCGAGGTCGACTACCGGCGNRG  | GgGcGcGTCGACGgGc-gaCGG   | + | 5 | 2 | 0 | 2.20 | 1.10 |
| Chr7:111740143-111740165  | 2 | DNA | GGCCGAGGTCGACTACCGGCGNRG  | GtGCAAGTCGAGTCgAGcCCCGG  | + | 5 | 2 | 0 | 2.20 | 1.10 |
| Chr6:5126873-5126895      |   |     |                           |                          |   |   |   |   |      |      |



|                           |           |     |                          |                           |                         |   |   |   |      |      |      |
|---------------------------|-----------|-----|--------------------------|---------------------------|-------------------------|---|---|---|------|------|------|
| Chr2:1074862-1074884      | 3         | DNA | GGCCGAGGTGCACTACCGGCGNRG | GGCCGAGGCGGcCtCGGCAAG     | +                       | 5 | 1 | 2 | 0.00 | 1.00 |      |
| Chr8:13708258-13708280    | 3         | RNA | GGCCGAGGTGCACTACCGGCGNRG | GGCCGAGGCGGAgT-CGAGGG     | +                       | 5 | 2 | 2 | 0.00 | 1.00 |      |
| Chr1:127278942-127278964  | 127278949 | 5   | RNA                      | GGCCGAGGTGCACTACCGGCGNRG  | GGCCGAGGCGG-THCGCCGG    | - | 5 | 2 | 0.00 | 1.00 |      |
| Chr7:182137973-182137995  | 182137980 | 5   | X                        | GGCCGAGGTGCACTACCGGCGNRG  | GGCCGAGGCGGACTCaGcCTGG  | - | 5 | 0 | 0.00 | 1.00 |      |
| Chr7:138466026-138466048  | 138466043 | 3   | RNA                      | GGCCGAGGTGCACTACCGGCGNRG  | G-tCCGGTCCGACaCgGCGGG   | + | 5 | 1 | 2    | 0.00 | 1.00 |
| Chr1:23314265-23314267    | 23314266  | 5   | RNA                      | GGCCGAGGTGCACTACCGGCGNRG  | GcGgGAGGCGA-CGAGCG      | - | 5 | 2 | 0.00 | 1.00 |      |
| Chr5:21058460-21058482    | 21058467  | 5   | DNA                      | GGCCGAGGTGCACTACCGGCGNRG  | GGCCGAGGCGACTAGgGCTGG   | - | 5 | 1 | 2    | 0.00 | 1.00 |
| Chr5:150123206-150123228  | 150123213 | 5   | RNA                      | GGCCGAGGTGCACTACCGGCGNRG  | GGCCGAGGctGCTA-CGgAGG   | - | 5 | 2 | 0.00 | 1.00 |      |
| Chr3:93193878-93193900    | 93193885  | 5   | RNA                      | GGCCGAGGTGCACTACCGGCGNRG  | GGCCGAGGCaCaCCaC-ATGG   | - | 5 | 2 | 0.00 | 1.00 |      |
| Chr2:189372054-189372076  | 189372071 | 3   | RNA                      | GGCCGAGGTGCACTACCGGCGNRG  | GGCCATgttggCTAC-CGGAGG  | + | 5 | 1 | 2    | 0.00 | 1.00 |
| Chr2:153252942-153252964  | 153252959 | 3   | RNA                      | GGCCGAGGTGCACTACCGGCGNRG  | GcCaGAGGTGGa-GcCGGAGG   | + | 5 | 1 | 2    | 0.00 | 1.00 |
| Chr2:42268940-42268962    | 42268957  | 3   | RNA                      | GGCCGAGGTGCACTACCGGCGNRG  | GGCAGAGGTGG-THCGGcaAG   | + | 5 | 2 | 0.00 | 1.00 |      |
| Chr1:10436165-10436187    | 10436172  | 5   | RNA                      | GGCCGAGGTGCACTACCGGCGNRG  | g-cAGGGTCCGCaCaCgGCGGG  | - | 5 | 1 | 2    | 0.00 | 1.00 |
| Chr7:135871758-135871780  | 135871765 | 5   | RNA                      | GGCCGAGGTGCACTACCGGCGNRG  | gctCGA-TCACCTACCGCGGG   | - | 4 | 1 | 2    | 0.00 | 1.00 |
| Chr5:195365636-195365658  | 195365643 | 5   | RNA                      | GGCCGAGGTGCACTACCGGCGNRG  | GcCaRGGTGAGCaBgG-GGCTGG | - | 5 | 1 | 2    | 0.00 | 1.00 |
| Chr3:196723239-196723251  | 196723236 | 5   | RNA                      | GGCCGAGGTGCACTACCGGCGNRG  | GGCCGAGGTTCGA-ACgtGAGAG | - | 5 | 2 | 0.00 | 1.00 |      |
| Chr5:189152310-189152332  | 189152317 | 5   | RNA                      | GGCCGAGGTGCACTACCGGCGNRG  | GGCCGAGGgGCaCaC-CGGCGG  | - | 4 | 2 | 0.00 | 1.00 |      |
| Chr1:75649191-75649213    | 75649198  | 5   | DNA                      | GGCCGAGGTGCACTACCGGCGNRG  | GGCAGAGTGCtTcGtGgTGG    | - | 5 | 2 | 0.00 | 1.00 |      |
| Chr7:115060114-115060136  | 115060131 | 3   | RNA                      | GGCCGAGGTGCACTACCGGCGNRG  | GgaGAGTGTGA-CCGGCGAG    | + | 5 | 2 | 0.00 | 1.00 |      |
| Chr7:9117462-9117484      | 9117469   | 5   | RNA                      | GGCCGAGGTGCACTACCGGCGNRG  | GcG-cGAGCaCaCgC-CGGCGG  | - | 5 | 1 | 2    | 0.00 | 1.00 |
| Chr1:79935085-79935107    | 79935092  | 5   | RNA                      | GGCCGAGGTGCACTACCGGCGNRG  | GgaCaAGTGGG-TcCaGtTGG   | - | 5 | 2 | 0.00 | 1.00 |      |
| Chr7:158525418-158525440  | 158525435 | 3   | RNA                      | GGCCGAGGTGCACTACCGGCGNRG  | CaCG-cCaACTCtGGCGGG     | + | 5 | 2 | 0.00 | 1.00 |      |
| Chr1:174887175-174887197  | 174887192 | 3   | RNA                      | GGCCGAGGTGCACTACCGGCGNRG  | aaG-GAGGTCCaCaCgGAGCG   | + | 5 | 2 | 0.00 | 1.00 |      |
| Chr8:19981006-19981028    | 19981023  | 3   | RNA                      | GGCCGAGGTGCACTACCGGCGNRG  | GgG-1AGGCGAgCaCGCGCGG   | + | 5 | 2 | 0.00 | 1.00 |      |
| Chr5:78952372-78952394    | 78952389  | 3   | RNA                      | GGCCGAGGTGCACTACCGGCGNRG  | GgGcG-GGcCaGctTCGGCGGG  | + | 5 | 1 | 2    | 0.00 | 1.00 |
| Chr1:2515702-2515704      | 25157029  | 3   | RNA                      | GGCCGAGGTGCACTACCGGCGNRG  | IGCCGCa-TaGAGGTCGGCGGG  | - | 5 | 2 | 0.00 | 1.00 |      |
| Chr5:5491921-5491943      | 5491926   | 5   | RNA                      | GGCCGAGGTGCACTACCGGCGNRG  | GcAGCGGgG-CGAGCaCaAGG   | - | 5 | 1 | 2    | 0.00 | 1.00 |
| Chr1:227453116-227453138  | 227453133 | 3   | RNA                      | GGCCGAGGTGCACTACCGGCGNRG  | GGCTc-TCGHTcTcGGCCAG    | + | 5 | 2 | 0.00 | 1.00 |      |
| Chr6:138003392-138003414  | 138003409 | 3   | RNA                      | GGCCGAGGTGCACTACCGGCGNRG  | GGCCc-gCaACTCtGGCGAG    | + | 5 | 2 | 0.00 | 1.00 |      |
| Chr6:125785691-125785713  | 125785708 | 3   | RNA                      | GGCCGAGGTGCACTACCGGCGNRG  | GGCC-ATGTCtCaAGCGCGG    | + | 4 | 1 | 2    | 0.00 | 1.00 |
| Chr7:123720490-123720512  | 123720507 | 3   | RNA                      | GGCCGAGGTGCACTACCGGCGNRG  | GcCtGGGTCCAGCa-GGGCGG   | + | 5 | 1 | 2    | 0.00 | 1.00 |
| Chr5:204222342-204222364  | 204222349 | 5   | RNA                      | GGCCGAGGTGCACTACCGGCGNRG  | GtCCcGG-GaTaACCGCGAG    | - | 5 | 2 | 0.00 | 1.00 |      |
| Chr1:58198497-58198519    | 58198504  | 5   | DNA                      | GGCCGAGGTGCACTACCGGCGNRG  | GGcAGGTGGcGcAGCAATCGAG  | - | 5 | 2 | 0.00 | 1.00 |      |
| Chr3:125996440-125996462  | 125996457 | 3   | RNA                      | GGCCGAGGTGCACTACCGGCGNRG  | GGCaAGGTGG-TcCaGtTGG    | + | 5 | 2 | 0.00 | 1.00 |      |
| Chr1:24117810-24117832    | 24117817  | 5   | RNA                      | GGCCGAGGTGCACTACCGGCGNRG  | GtCCa-THAgctCGGCGG      | - | 5 | 2 | 0.00 | 1.00 |      |
| Chr4:22179363-22179374    | 22179370  | 5   | RNA                      | GGCCGAGGTGCACTACCGGCGNRG  | GcCGGAGTTCGaCaAGGtTGG   | - | 5 | 2 | 0.00 | 1.00 |      |
| Chr4:234088684-234088706  | 234088701 | 3   | RNA                      | GGCCGAGGTGCACTACCGGCGNRG  | cCGCaACTGCTGG-CcCGAGG   | - | 4 | 2 | 0.00 | 1.00 |      |
| Chr10:6006147-6006169     | 6006154   | 5   | RNA                      | GGCCGAGGTGCACTACCGGCGNRG  | GagGTGGcCGAAT-CGGCGAG   | - | 5 | 2 | 0.00 | 1.00 |      |
| Chr4:233088295-233088317  | 233088302 | 5   | RNA                      | GGCCGAGGTGCACTACCGGCGNRG  | a-CCGGGTCCGCaCaCccCGGG  | - | 4 | 1 | 2    | 0.00 | 1.00 |
| Chr2:161210380-161210402  | 161210397 | 3   | RNA                      | GGCCGAGGTGCACTACCGGCGNRG  | T-CAGAGCaACTCtGGCGTGG   | + | 5 | 2 | 0.00 | 1.00 |      |
| Chr10:119832362-119832384 | 119832379 | 3   | RNA                      | GGCCGAGGTGCACTACCGGCGNRG  | GcCtGcGGTGCAT-CCGCGGG   | + | 5 | 1 | 2    | 0.00 | 1.00 |
| Chr10:39633642-39633664   | 39633659  | 3   | RNA                      | GGCCGAGGTGCACTACCGGCGNRG  | caaCG-GTCCACTCaCGGGG    | - | 5 | 2 | 0.00 | 1.00 |      |
| Chr10:120975499-120975521 | 120975506 | 5   | RNA                      | GGCCGAGGTGCACTACCGGCGNRG  | GtCCcGG-GaTaACCGCGAG    | - | 5 | 2 | 0.00 | 1.00 |      |
| Chr5:13762765-13762787    | 13762772  | 5   | DNA                      | GGCCGAGGTGCACTACCGGCGNRG  | GGTcAGGTTCGgTcGgAGCCCGG | - | 5 | 2 | 0.00 | 1.00 |      |
| Chr2:213131578-213131600  | 213131585 | 3   | RNA                      | GGCCGAGGTGCACTACCGGCGNRG  | GtCCAGGcGgGACT-CGCAAG   | + | 4 | 2 | 0.00 | 1.00 |      |
| Chr10:15008749-15008761   | 15008756  | 3   | DNA                      | GGCCGAGGTGCACTACCGGCGNRG  | GaGtGGGTGGGACT-TCGAGG   | + | 5 | 2 | 0.00 | 1.00 |      |
| Chr7:157084213-157084235  | 157084230 | 3   | DNA                      | GGC-CGAAGTGCCTACCGGCGNRG  | GGCTCCtGGGCaCaCGCGCGGG  | + | 5 | 2 | 0.00 | 1.00 |      |
| Chr9:129870864-129870886  | 129870881 | 3   | RNA                      | GGCCGAGGTGCACTACCGGCGNRG  | GGC-AGGcTGCACaAgGcCAAG  | + | 5 | 2 | 0.00 | 1.00 |      |
| Chr1:248328296-248328318  | 248328303 | 5   | RNA                      | GGCCGAGGTGCACTACCGGCGNRG  | GcGtAGGgGtGcCTC-GGGCAGG | - | 5 | 1 | 2    | 0.00 | 1.00 |
| Chr1:217174659-217174681  | 217174676 | 3   | RNA                      | GGCCGAGGTGCACTACCGGCGNRG  | GtGtAATcCTC-ATCCCGCTGG  | + | 4 | 1 | 2    | 0.00 | 1.00 |
| Chr3:146234967-146234989  | 146234984 | 3   | RNA                      | GGCCGAGGTGCACTACCGGCGNRG  | caCaAGTGCCT-CCGCGAG     | + | 5 | 1 | 2    | 0.00 | 1.00 |
| Chr5:20792377-20792399    | 20792394  | 3   | RNA                      | GGCCGAGGTGCACTACCGGCGNRG  | cg-GAGTTCGCaACCGGAGG    | + | 4 | 2 | 0.00 | 1.00 |      |
| Chr10:129515239-129515261 | 129515246 | 5   | RNA                      | GGCCGAGGTGCACTACCGGCGNRG  | GgCGAG-CcAaAGCGGAG      | - | 5 | 2 | 0.00 | 1.00 |      |
| Chr4:134692008-134692030  | 134692015 | 5   | RNA                      | GGCCGAGGTGCACTACCGGCGNRG  | aGggGAGTGCAT-GGCTAG     | - | 5 | 2 | 0.00 | 1.00 |      |
| Chr3:231653432-231653454  | 231653439 | 5   | RNA                      | GGCCGAGGTGCACTACCGGCGNRG  | GcCgAGGcGCAC-CGGTAAG    | - | 5 | 2 | 0.00 | 1.00 |      |
| Chr5:139056990-139056992  | 139056997 | 5   | RNA                      | GGCCGAGGTGCACTACCGGCGNRG  | GaCgGgG-TGCaCaAGGtTGG   | - | 4 | 2 | 0.00 | 1.00 |      |
| Chr2:36345316-36345338    | 36345323  | 5   | RNA                      | GGCCGAGGTGCACTACCGGCGNRG  | TCGGAGGCTGG-TCGtGAGT    | - | 4 | 2 | 0.00 | 1.00 |      |
| Chr6:159092141-159092163  | 159092148 | 5   | DNA                      | GGCCGAGGTGCACTACCGGCGNRG  | GGcGACGGTCCgCaCGGCGAG   | - | 5 | 1 | 2    | 0.00 | 1.00 |
| Chr6:48756286-48756308    | 48756303  | 3   | RNA                      | GGCCGAGGTGCACTACCGGCGNRG  | G-cAGGGTCCGCaCaAgGCGGG  | + | 5 | 1 | 2    | 0.00 | 1.00 |
| Chr1:203648489-203648511  | 203648496 | 5   | RNA                      | GGCCGAGGTGCACTACCGGCGNRG  | GGCC-GGTGtCCaACTGGCGGG  | - | 3 | 1 | 2    | 0.00 | 1.00 |
| Chr6:67437711-67437733    | 67437718  | 5   | RNA                      | GGCCGAGGTGCACTACCGGCGNRG  | GG-aaAGTGCATGtCCAAAG    | - | 5 | 2 | 0.00 | 1.00 |      |
| Chr3:120021351-120021373  | 120021358 | 5   | RNA                      | GGCCGAGGTGCACTACCGGCGNRG  | GGCC-gTGCAGCCGaTGG      | - | 5 | 2 | 0.00 | 1.00 |      |
| Chr8:135492607-135492629  | 135492624 | 3   | RNA                      | GGCCGAGGTGCACTACCGGCGNRG  | GGCCaAGGc-CtGgTGGAG     | + | 5 | 2 | 0.00 | 1.00 |      |
| Chr6:70495846-70495868    | 70495863  | 3   | RNA                      | GGCCGAGGTGCACTACCGGCGNRG  | GGCCGAGGCGCa-ActGcTGG   | - | 5 | 2 | 0.00 | 1.00 |      |
| Chr7:7638660-7638682      | 7638677   | 3   | RNA                      | GGCCGAGGTGCACTACCGGCGNRG  | GtCCAGTGTGAGTACT-CGAG   | + | 5 | 2 | 0.00 | 1.00 |      |
| Chr1:30120640-30120662    | 30120647  | 3   | RNA                      | GGCCGAGGTGCACTACCGGCGNRG  | GtGtGGGTGGGACT-TCGAGG   | + | 5 | 2 | 0.00 | 1.00 |      |
| Chr10:130123197-130123219 | 130123214 | 3   | RNA                      | GGCCGAGGTGCACTACCGGCGNRG  | GcCgGtG-CcCaACTCCGAGG   | - | 5 | 2 | 0.00 | 1.00 |      |
| Chr9:119632212-119632234  | 119632229 | 3   | RNA                      | GGCCGAGGTGCACTACCGGCGNRG  | GGcG-GGcGCaCtCCGGCGGG   | + | 4 | 1 | 2    | 0.00 | 1.00 |
| Chr7:16908060-16908082    | 16908077  | 3   | RNA                      | GGCCGAGGTGCACTACCGGCGNRG  | G-cAGGGTCCGCaCaAgGCGGG  | + | 5 | 1 | 2    | 0.00 | 1.00 |
| Chr5:158274315-158274337  | 158274322 | 3   | RNA                      | GGCCGAGGTGCACTACCGGCGNRG  | ccCGGgGTTCGA-AAcCGCGAG  | - | 5 | 2 | 0.00 | 1.00 |      |
| Chr8:164180904-164180926  | 164180921 | 3   | RNA                      | GGCCGAGGTGCACTACCGGCGNRG  | actCCATGCGA-ACgGGCAAG   | + | 5 | 2 | 0.00 | 1.00 |      |
| Chr5:12129976-12129998    | 12129983  | 5   | RNA                      | GGCCGAGGTGCACTACCGGCGNRG  | T-CGAGTCCGCaAGCGCGGG    | - | 5 | 2 | 0.00 | 1.00 |      |
| Chr1:27877816-27877838    | 27877833  | 3   | RNA                      | GGCCGAGGTGCACTACCGGCGNRG  | a-CGGGTTCCGCaCaCgGCGGG  | + | 5 | 2 | 0.00 | 1.00 |      |
| Chr7:148639167-148639189  | 148639184 | 3   | RNA                      | GGCCGAGGTGCACTACCGGCGNRG  | GGC-tGcGACTCCGCTGG      | + | 5 | 2 | 0.00 | 1.00 |      |
| Chr8:26367980-26368002    | 26367997  | 3   | RNA                      | GGCCGAGGTGCACTACCGGCGNRG  | tCCCAHTGCAATA-IGTCTG    | + | 5 | 2 | 0.00 | 1.00 |      |
| Chr8:15381925-15381947    | 15381932  | 3   | RNA                      | GGCCGAGGTGCACTACCGGCGNRG  | GtCCAGGgGtGgTg-GGCGAGG  | + | 5 | 2 | 0.00 | 1.00 |      |
| Chr1:102734820-102734842  | 102734827 | 3   | RNA                      | GGCCGAGGTGCACTACCGGCGNRG  | GGCCc-gTGCAGCCGCaAG     | + | 5 | 2 | 0.00 | 1.00 |      |
| Chr9:14878260-14878282    | 14878267  | 5   | DNA                      | GGCCGAGGTGCACTACCGGCGNRG  | GGCCGgGTGAGCaACTCCTGG   | - | 5 | 1 | 2    | 0.00 | 1.00 |
| Chr9:136164941-136164963  | 136164948 | 5   | RNA                      | GGCCGAGGTGCACTACCGGCGNRG  | GGCCaTG-GcCgTCCGGCGG    | - | 5 | 1 | 2    | 0.00 | 1.00 |
| Chr6:46578926-46578948    | 46578933  | 5   | RNA                      | GGCCGAGGTGCACTACCGGCGNRG  | tGGTAGGTGtCaA-GGGCAGG   | - | 5 | 2 | 0.00 | 1.00 |      |
| Chr2:166012334-166012356  | 166012351 | 5   | RNA                      | GGCCGAGGTGCACTACCGGCGNRG  | GG-aaAGgTaTAgGGCAGG     | + | 5 | 2 | 0.00 | 1.00 |      |
| Chr2:61178642-61178664    | 61178649  | 5   | RNA                      | GGCCGAGGTGCACTACCGGCGNRG  | acCCGgGCaCGaG-CcCaGAG   | - | 5 | 2 | 0.00 | 1.00 |      |
| Chr6:156689741-156689763  | 156689748 | 5   | RNA                      | GGCCGAGGTGCACTACCGGCGNRG  | GGCCc-gTGGAGTCCGCTGG    | - | 5 | 2 | 0.00 | 1.00 |      |
| Chr6:157449386-157449408  | 157449393 | 5   | RNA                      | GGCCGAGGTGCACTACCGGCGNRG  | GGCC-GGTCCGCaCCGGCGGG   | - | 5 | 2 | 0.00 | 1.00 |      |
| Chr2:119055300-119055322  | 119055307 | 5   | RNA                      | GGCCGAGGTGCACTACCGGCGNRG  | GtCCAGTGTGAGTACT-CGAG   | + | 4 | 2 | 0.00 | 1.00 |      |
| Chr7:2319479-2319481      | 2319479   | 5   | RNA                      | GGCCGAGGTGCACTACCGGCGNRG  | GGCCGAGGgGACT-TCGAGG    | - | 5 | 2 | 0.00 | 1.00 |      |
| Chr1:21128712-21128734    | 21128719  | 5   | RNA                      | GGCCGAGGTGCACTACCGGCGNRG  | GGCCc-gTGCAGCCGCGGG     | - | 4 | 1 | 2    | 0.00 | 1.00 |
| Chr4:65547281-65547303    | 65547288  | 5   | RNA                      | GGCCGAGGTGCACTACCGGCGNRG  | GGaCaACTGG-TcCaGtTGG    | - | 5 | 2 | 0.00 | 1.00 |      |
| Chr8:120328231-120328253  | 120328248 | 3   | DNA                      | G-GCCGAGGTGCACTACCGGCGNRG | GGCCGgGTGCATCCCGCGGG    | - | 5 | 2 | 0.00 | 1.00 |      |
| Chr8:174202228-174202050  | 174202045 | 3   | RNA                      | GGCCGAGGTGCACTACCGGCGNRG  | GGCCGgAGc-CtAACCcAG     | + | 5 | 2 | 0.00 | 1.00 |      |
| Chr2:103165038-103165060  | 103165045 | 5   | RNA                      | GGCCGAGGTGCACTACCGGCGNRG  | GgAGGAGTGG-TAGaGGCTAG   | - | 5 | 2 | 0.00 | 1.00 |      |
| Chr2:104196829-104196851  | 104196846 | 3   | RNA                      | GGCCGAGGTGCACTACCGGCGNRG  | GGaCaAGGgCaCaCa-CGCTAG  | + | 5 | 2 | 0.00 | 1.00 |      |
| Chr9:138983243-138983265  | 138983250 | 3   | RNA                      | GGCCGAGGTGCACTACCGGCGNRG  | GCaCaAGGcCTC-CCGCTGG    | - | 5 | 1 | 2    | 0.00 | 1.00 |
| Chr1:148312942-148312964  | 148312959 | 3   | RNA                      | GGCCGAGGTGCACTACCGGCGNRG  | GGCaAGG-gGCTCtGcGCGG    | + | 5 | 2 | 0.00 | 1.00 |      |
| Chr7:17801759-17801781    | 17801766  | 5   | RNA                      | GGCCGAGGTGCACTACCGGCGNRG  | GaTCAGCaCG-TACCaCTGG    | - | 5 | 2 | 0.00 | 1.00 |      |
| Chr1:146949056-146949078  | 1469490   |     |                          |                           |                         |   |   |   |      |      |      |

|                           |   |     |                          |                            |   |   |   |   |      |      |
|---------------------------|---|-----|--------------------------|----------------------------|---|---|---|---|------|------|
| Chr10:129019630-129019652 | 3 | RNA | GGCCGAGGTGCACTACCGGCRNG  | G-aCggGGTCCaCaCgagCGGG     | + | 5 | 1 | 2 | 0.00 | 1.00 |
| Chr10:12327514-12327536   | 3 | RNA | GGCCGAGGTGCACTACCGGCRNG  | GCCCGAGGTAGCaAa-GtaGAG     | + | 5 | 1 | 2 | 0.00 | 1.00 |
| Chr10:57278910-57278932   | 3 | RNA | GGCCGAGGTGCACTACCGGCRNG  | GGCCGAGGCGGCa-AggGGCCGG    | - | 5 | 2 | 2 | 0.00 | 1.00 |
| Chr2:160691875-160691897  | 3 | RNA | GGCCGAGGTGCACTACCGGCRNG  | Gg-GgGATCGACTCCGCGGG       | + | 5 | 2 | 2 | 0.00 | 1.00 |
| Chr4:139741790-139741812  | 3 | RNA | GGCCGAGGTGCACTACCGGCRNG  | aGacGAGCTCGACTCCGRTGG      | + | 5 | 1 | 2 | 0.00 | 1.00 |
| Chr1:141335412-141335434  | 5 | RNA | GGCCGAGGTGCACTACCGGCRNG  | GGCCGAGG-GAagGCGCGAG       | + | 5 | 2 | 2 | 0.00 | 1.00 |
| Chr5:19999870-19999892    | 3 | RNA | GGCCGAGGTGCACTACCGGCRNG  | G-aCgGCTGCGACaCgagCGGG     | + | 5 | 1 | 2 | 0.00 | 1.00 |
| Chr5:154323098-154323120  | 5 | RNA | GGCCGAGGTGCACTACCGGCRNG  | GGC-HGcGACTACAgGCTGG       | - | 5 | 2 | 2 | 0.00 | 1.00 |
| Chr2:115844734-115844756  | 5 | RNA | GGCCGAGGTGCACTACCGGCRNG  | GGCCAGGcGg-gACCCCGGG       | - | 5 | 2 | 2 | 0.00 | 1.00 |
| Chr4:165533463-165533485  | 5 | RNA | GGCCGAGGTGCACTACCGGCRNG  | GgGcAGG-gGcagCCGCGGG       | - | 4 | 2 | 2 | 0.00 | 1.00 |
| Chr2:4533383-4533405      | 3 | RNA | GGCCGAGGTGCACTACCGGCRNG  | G-aCAGGTCGACaCgagCGGG      | + | 4 | 1 | 2 | 0.00 | 1.00 |
| Chr1:265313976-265313998  | 3 | RNA | GGCCGAGGTGCACTACCGGCRNG  | aCCCGAGTCACTAC-GgaAG       | + | 4 | 1 | 2 | 0.00 | 1.00 |
| Chr9:26400028-26400050    | 3 | RNA | GGCCGAGGTGCACTACCGGCRNG  | GtCCG-gTgCaCCGGAATAG       | + | 5 | 2 | 2 | 0.00 | 1.00 |
| Chr7:8485288-84852510     | 3 | RNA | GGCCGAGGTGCACTACCGGCRNG  | GGCCAGAGGcG-GTgCGCAGG      | + | 5 | 2 | 2 | 0.00 | 1.00 |
| Chr10:9400556-94005578    | 3 | RNA | GGCCGAGGTGCACTACCGGCRNG  | GaCgAGGTgGACTA-GTCAAG      | + | 5 | 2 | 2 | 0.00 | 1.00 |
| Chr10:6150444-6150466     | 5 | RNA | GGCCGAGGTGCACTACCGGCRNG  | ttCCAGGTG-GaAGCGCCAG       | + | 5 | 2 | 2 | 0.00 | 1.00 |
| Chr1:117161254-117161276  | 5 | RNA | GGCCGAGGTGCACTACCGGCRNG  | GCCCGGcGg-cCaCAGcCGGAAG    | - | 5 | 2 | 2 | 0.00 | 1.00 |
| Chr2:86752278-86752300    | 3 | RNA | GGCCGAGGTGCACTACCGGCRNG  | Gg-gGcGTGgAGCCGCGAG        | + | 5 | 2 | 2 | 0.00 | 1.00 |
| Chr1:229450438-229450460  | 3 | DNA | GGCCGAGGT-GCACTACCGGCRNG | GgaCAGGTTCCGACaAagGGCGGG   | + | 4 | 2 | 2 | 0.00 | 1.00 |
| Chr3:93391071-93391093    | 5 | RNA | GGCCGAGGTGCACTACCGGCRNG  | GaCa-GGTCCAGcCaAGCGGG      | + | 5 | 1 | 2 | 0.00 | 1.00 |
| Chr2:138645561-138645583  | 3 | RNA | GGCCGAGGTGCACTACCGGCRNG  | GgGcGgG-gGgGgCCGCGAG       | + | 5 | 2 | 2 | 0.00 | 1.00 |
| Chr2:101562640-101562662  | 3 | RNA | GGCCGAGGTGCACTACCGGCRNG  | GCC-AGaGTgGCTACtGgAGG      | + | 5 | 1 | 2 | 0.00 | 1.00 |
| Chr8:15152296-15152318    | 5 | RNA | GGCCGAGGTGCACTACCGGCRNG  | GGaCaAGTGG-GTcCaGtTgG      | - | 5 | 2 | 2 | 0.00 | 1.00 |
| Chr3:178007838-178007860  | 3 | RNA | GGCCGAGGTGCACTACCGGCRNG  | GCC-GAGCaGtagACCGCGGAG     | + | 5 | 2 | 2 | 0.00 | 1.00 |
| Chr5:204965973-204965995  | 3 | RNA | GGCCGAGGTGCACTACCGGCRNG  | c-CAGAtaGACTAaCGAGT        | + | 5 | 1 | 2 | 0.00 | 1.00 |
| Chr2:25898957-25898979    | 5 | RNA | GGCCGAGGTGCACTACCGGCRNG  | aGCGAGGcGACTCCAGCGGG       | + | 5 | 1 | 2 | 0.00 | 1.00 |
| Chr9:142788515-142788537  | 5 | RNA | GGCCGAGGTGCACTACCGGCRNG  | GG-GAGATCGACTCCGCGGG       | - | 5 | 2 | 2 | 0.00 | 1.00 |
| Chr5:4062455-4062477      | 5 | RNA | GGCCGAGGTGCACTACCGGCRNG  | GcGcTA-TTgCTTcCGCGGG       | - | 5 | 2 | 2 | 0.00 | 1.00 |
| Chr1:5883919-5883941      | 5 | DNA | GGCCGAGG-TGCACTACCGGCRNG | ccCGCAGACTCCGCTgGCTAG      | - | 5 | 1 | 2 | 0.00 | 1.00 |
| Chr2:14263116-14263138    | 3 | RNA | GGCCGAGGTGCACTACCGGCRNG  | GtGcAAGTCC-GTgCaGcAGG      | + | 5 | 1 | 2 | 0.00 | 1.00 |
| Chr5:199934854-199934876  | 5 | RNA | GGCCGAGGTGCACTACCGGCRNG  | GtCCG-gTgCaCCGCGAG         | - | 5 | 2 | 2 | 0.00 | 1.00 |
| Chr1:197047925-197047947  | 3 | RNA | GGCCGAGGTGCACTACCGGCRNG  | G-aCAGCaGcAGCaACTCGAG      | + | 5 | 1 | 2 | 0.00 | 1.00 |
| Chr1:32192321-32192343    | 3 | RNA | GGCCGAGGTGCACTACCGGCRNG  | GaCCGgGgGgA-aCCGCGCGG      | + | 5 | 2 | 2 | 0.00 | 1.00 |
| Chr5:93937940-93937962    | 3 | RNA | GGCCGAGGTGCACTACCGGCRNG  | GgGtGgAGGcGACTA-GCCGG      | - | 4 | 2 | 2 | 0.00 | 1.00 |
| Chr6:107757665-107757687  | 3 | RNA | GGCCGAGGTGCACTACCGGCRNG  | GtCCCAAGTCGCA-AahtGCTAG    | + | 5 | 2 | 2 | 0.00 | 1.00 |
| Chr1:112271048-112271070  | 3 | RNA | GGCCGAGGTGCACTACCGGCRNG  | Gg-GAGGCaGAGaAGCGAGG       | + | 5 | 2 | 2 | 0.00 | 1.00 |
| Chr2:127387923-127387945  | 3 | RNA | GGCCGAGGTGCACTACCGGCRNG  | GgGcGgGTGcGCTCCGAGAG       | + | 5 | 1 | 2 | 0.00 | 1.00 |
| Chr9:7940908-7940930      | 3 | RNA | GGCCGAGGTGCACTACCGGCRNG  | GgGcGAGcTGA-AcGgGCTAG      | + | 3 | 2 | 2 | 0.00 | 1.00 |
| Chr1:38747461-38747483    | 5 | RNA | GGCCGAGGTGCACTACCGGCRNG  | GgGcAGGTGcAGTAg-GgGcCAG    | - | 4 | 1 | 2 | 0.00 | 1.00 |
| Chr9:152449405-152449427  | 3 | RNA | GGCCGAGGTGCACTACCGGCRNG  | GgGcAGG-gAGcAGTcCGGG       | + | 5 | 2 | 2 | 0.00 | 1.00 |
| Chr1:22495432-22495454    | 3 | RNA | GGCCGAGGTGCACTACCGGCRNG  | GcCCAGGcGCaCaCCc-gTGG      | + | 5 | 2 | 2 | 0.00 | 1.00 |
| Chr6:54009023-54009045    | 3 | RNA | GGCCGAGGTGCACTACCGGCRNG  | GGCCGgGtGGA-TcTcCGCGAG     | + | 5 | 1 | 2 | 0.00 | 1.00 |
| Chr7:137588483-137588505  | 5 | DNA | GGC-CGAGGTGCACTACCGGCRNG | GGCACCGTCCGATgAGCGCTGG     | - | 5 | 2 | 2 | 0.00 | 1.00 |
| Chr2:124122825-124122847  | 3 | RNA | GGCCGAGGTGCACTACCGGCRNG  | GgT-GAGGTGcAGCaCatGatAG    | + | 5 | 1 | 2 | 0.00 | 1.00 |
| Chr2:183194446-183194468  | 3 | RNA | GGCCGAGGTGCACTACCGGCRNG  | cCCCGAGTcGcGACT-cTgCScCAAG | + | 5 | 2 | 2 | 0.00 | 1.00 |
| Chr5:1351317-1351339      | 3 | RNA | GGCCGAGGTGCACTACCGGCRNG  | G-aCgGcTCCGACTCCAGCGGG     | + | 5 | 1 | 2 | 0.00 | 1.00 |
| Chr4:208437914-208437936  | 3 | RNA | GGCCGAGGTGCACTACCGGCRNG  | GahtAGGAGcAGT-CGCaGcG      | + | 5 | 2 | 2 | 0.00 | 1.00 |
| Chr3:232570199-232570221  | 3 | RNA | GGCCGAGGTGCACTACCGGCRNG  | GaA-GAGGAGcAGCaAGCGCTGG    | + | 5 | 1 | 2 | 0.00 | 1.00 |
| Chr4:173354999-173355021  | 3 | RNA | GGCCGAGGTGCACTACCGGCRNG  | GtCCG-gTgCaCCGCGAG         | + | 5 | 2 | 2 | 0.00 | 1.00 |
| Chr5:2760202-2760224      | 3 | RNA | GGCCGAGGTGCACTACCGGCRNG  | GGCCAGAGc-CcACcCGCGG       | - | 5 | 2 | 2 | 0.00 | 1.00 |
| Chr3:214825383-214825405  | 3 | RNA | GGCCGAGGTGCACTACCGGCRNG  | GtCCG-gGTgCaCTcCCcAGG      | + | 5 | 1 | 2 | 0.00 | 1.00 |
| Chr9:77697514-77697536    | 3 | RNA | GGCCGAGGTGCACTACCGGCRNG  | GgGc-AGGcCGAGCaCCGCGGG     | + | 4 | 1 | 2 | 0.00 | 1.00 |
| Chr8:95710211-95710233    | 5 | RNA | GGCCGAGGTGCACTACCGGCRNG  | G-aCgGgGTGCaCaCgagCGGG     | + | 5 | 1 | 2 | 0.00 | 1.00 |
| Chr10:120745055-120745077 | 5 | RNA | GGCCGAGGTGCACTACCGGCRNG  | GGC-AgacCTcACTCCGCGGG      | - | 5 | 2 | 2 | 0.00 | 1.00 |
| Chr9:53478402-53478424    | 5 | RNA | GGCCGAGGTGCACTACCGGCRNG  | GtCCGAG-gACTcAGCGGG        | - | 5 | 2 | 2 | 0.00 | 1.00 |
| Chr1:86156470-86156492    | 5 | RNA | GGCCGAGGTGCACTACCGGCRNG  | Gg-GAGGCGGcAGCaAGCGAGG     | + | 5 | 2 | 2 | 0.00 | 1.00 |
| Chr7:159062223-15906245   | 3 | RNA | GGCCGAGGTGCACTACCGGCRNG  | cCCCaACTcAAC-CCGCGGG       | + | 5 | 2 | 2 | 0.00 | 1.00 |
| Chr7:72618723-72618745    | 5 | DNA | GGC-GAGGTGCACTACCGGCRNG  | GcTCCGAGGcGtCTCCGCGTGG     | - | 4 | 1 | 2 | 0.00 | 1.00 |
| Chr1:306256510-306256532  | 5 | DNA | GGCCGAGG-TGCACTACCGGCRNG | GGcGcAaGTGCACTAcAtgTGG     | - | 5 | 1 | 2 | 0.00 | 1.00 |
| Chr3:195835568-195835590  | 3 | RNA | GGCCGAGGTGCACTACCGGCRNG  | GgGcAaAGTCC-GTgCGCGAG      | + | 5 | 2 | 2 | 0.00 | 1.00 |
| Chr7:181053709-181053731  | 3 | RNA | GGCCGAGGTGCACTACCGGCRNG  | GgaGAGGTGCGAGcAG-CgagCGG   | + | 5 | 1 | 2 | 0.00 | 1.00 |
| Chr1:200694720-200694742  | 3 | RNA | GGCCGAGGTGCACTACCGGCRNG  | GtCCG-GaaAGaTCCGGAAG       | + | 5 | 2 | 2 | 0.00 | 1.00 |
| Chr1:10504032-10504054    | 3 | X   | GGCCGAGGTGCACTACCGGCRNG  | GGCCCaGATCCcTtGGCGCGGG     | + | 5 | 0 | 2 | 0.00 | 1.00 |
| Chr5:17202656-17202678    | 5 | RNA | GGCCGAGGTGCACTACCGGCRNG  | caCAAGTCCGCT-CCGCGAG       | - | 5 | 1 | 2 | 0.00 | 1.00 |
| Chr2:64885770-64885792    | 5 | RNA | GGCCGAGGTGCACTACCGGCRNG  | cCCCGAGT-GAcGcCGCGAG       | + | 5 | 1 | 2 | 0.00 | 1.00 |
| Chr7:68052428-68052450    | 3 | RNA | GGCCGAGGTGCACTACCGGCRNG  | GcCCGAGGcGCaCaCTCCGCGGG    | + | 5 | 2 | 2 | 0.00 | 1.00 |
| Chr1:266544125-266544147  | 5 | RNA | GGCCGAGGTGCACTACCGGCRNG  | GcC-aAGGTGcCaACTCCGCTGG    | - | 4 | 1 | 2 | 0.00 | 1.00 |
| Chr4:228259976-228259998  | 3 | RNA | GGCCGAGGTGCACTACCGGCRNG  | ttGcGAGGTGcAGgACC-THG      | + | 5 | 2 | 2 | 0.00 | 1.00 |
| Chr8:106375413-106375435  | 3 | RNA | GGCCGAGGTGCACTACCGGCRNG  | c-CGcGcGcAaAcCCGCGAG       | + | 5 | 2 | 2 | 0.00 | 1.00 |
| Chr1:151542562-151542584  | 5 | RNA | GGCCGAGGTGCACTACCGGCRNG  | GGCTc-GcCaACTCCGCGAG       | + | 5 | 2 | 2 | 0.00 | 1.00 |
| Chr2:17800002-17800024    | 5 | RNA | GGCCGAGGTGCACTACCGGCRNG  | GtCCG-gTgCaCCGCGAG         | - | 5 | 2 | 2 | 0.00 | 1.00 |
| Chr5:93820288-93820310    | 3 | DNA | G-GCCGAGGTGCACTACCGGCRNG | GTAGCCAGGTCGACcCaGgCGAG    | + | 4 | 2 | 2 | 0.00 | 1.00 |
| Chr8:146627299-146627321  | 5 | DNA | GGC-CGAGGTGCACTACCGGCRNG | cGCTCCGgGATGtCTCCGCTGG     | - | 5 | 2 | 2 | 0.00 | 1.00 |
| Chr4:228197456-228197478  | 5 | RNA | GGCCGAGGTGCACTACCGGCRNG  | GtCtAcG-gACTACCGCTGG       | - | 4 | 2 | 2 | 0.00 | 1.00 |
| Chr2:15270927-15270949    | 3 | RNA | GGCCGAGGTGCACTACCGGCRNG  | GaTCCGAGcCGAcCaAaGgAG      | + | 5 | 1 | 2 | 0.00 | 1.00 |
| Chr1:251528727-25152894   | 5 | RNA | GGCCGAGGTGCACTACCGGCRNG  | GcCCGAGTcGACTCCGCGGG       | - | 4 | 1 | 2 | 0.00 | 1.00 |
| Chr3:86293443-86293465    | 5 | RNA | GGCCGAGGTGCACTACCGGCRNG  | GcAtCGAAGTCC-ggHGGCCGG     | - | 4 | 2 | 2 | 0.00 | 1.00 |
| Chr4:82435430-82435452    | 3 | RNA | GGCCGAGGTGCACTACCGGCRNG  | tGCaGgGcTCCGCTA-GGCTGG     | + | 5 | 2 | 2 | 0.00 | 1.00 |
| Chr9:88565741-88565763    | 5 | X   | GGCCGAGGTGCACTACCGGCRNG  | GcCaGAGGgGgAaTCCCGCTGG     | + | 5 | 0 | 2 | 0.00 | 1.00 |
| Chr2:193040511-193040533  | 3 | RNA | GGCCGAGGTGCACTACCGGCRNG  | GGCCGAGGcCGAgcCC-IGGG      | - | 5 | 2 | 2 | 0.00 | 1.00 |
| Chr8:62989458-62989480    | 3 | RNA | GGCCGAGGTGCACTACCGGCRNG  | cGtGAGTtG-TACCGCCGG        | + | 5 | 2 | 2 | 0.00 | 1.00 |
| Chr6:18764727-18764749    | 5 | RNA | GGCCGAGGTGCACTACCGGCRNG  | GtCCG-gTgGcCaCCGGAATAG     | + | 5 | 2 | 2 | 0.00 | 1.00 |
| Chr8:4558797-4558819      | 5 | RNA | GGCCGAGGTGCACTACCGGCRNG  | GGC-AGGTCTcTcCaCaGcAAG     | - | 5 | 1 | 2 | 0.00 | 1.00 |
| Chr1:82134215-82134237    | 5 | RNA | GGCCGAGGTGCACTACCGGCRNG  | GGC-tcGgGACTCCGCGTGG       | - | 4 | 2 | 2 | 0.00 | 1.00 |
| Chr7:123319594-123319516  | 5 | RNA | GGCCGAGGTGCACTACCGGCRNG  | GaCCAGGcGcGACTc-GGCaAG     | + | 4 | 2 | 2 | 0.00 | 1.00 |
| Chr5:99787853-99787875    | 3 | RNA | GGCCGAGGTGCACTACCGGCRNG  | GcCCGAGGcGcCaACTCCGCGGG    | + | 5 | 2 | 2 | 0.00 | 1.00 |
| Chr1:276024506-276024528  | 3 | RNA | GGCCGAGGTGCACTACCGGCRNG  | ttGcGgGc-gACTACCGCTGG      | + | 5 | 2 | 2 | 0.00 | 1.00 |
| Chr3:30024630-30024652    | 3 | X   | GGCCGAGGTGCACTACCGGCRNG  | GGCCGAGGcGAGrtTgGCGGAG     | + | 5 | 0 | 2 | 0.00 | 1.00 |
| Chr4:127812308-127812330  | 3 | RNA | GGCCGAGGTGCACTACCGGCRNG  | GcCaGAGGgGc-cACCGGcAG      | - | 5 | 2 | 2 | 0.00 | 1.00 |
| Chr3:84602825-84602847    | 3 | RNA | GGCCGAGGTGCACTACCGGCRNG  | GgGcAGGcTcGcGcGGCGGAG      | + | 5 | 1 | 2 | 0.00 | 1.00 |
| Chr8:5994399-5994421      | 3 | RNA | GGCCGAGGTGCACTACCGGCRNG  | G-aCAGGTCGACaCgagCGGG      | + | 5 | 1 | 2 | 0.00 | 1.00 |
| Chr4:144602546-144602568  | 3 | X   | GGCCGAGGTGCACTACCGGCRNG  | GcGcGtAGAcTcGtTgGCGGAG     | + | 5 | 0 | 2 | 0.00 | 1.00 |
| Chr2:59678565-59678587    | 3 | RNA | GGCCGAGGTGCACTACCGGCRNG  | GGC-HtGgGACTACCGCTGG       | + | 4 | 2 | 2 | 0.00 | 1.00 |
| Chr8:63187888-63187910    | 3 | DNA | GGCCGAGGTGCACTACCGGCRNG  | GgGcAGGtGgGcCaACTCCGCGAG   | + | 5 | 2 | 2 | 0.00 | 1.00 |
| Chr7:33714278-33714300    | 5 | DNA | GGC-GAGGTGCACTACCGGCRNG  | aGCTCAaTTCAGCaCCGCGTGG     | - | 5 | 1 | 2 | 0.00 | 1.00 |
| Chr3:185874988-185875010  | 5 | RNA | GGCCGAGGTGCACTACCGGCRNG  | GtCCG-gTgCaCCGCGAG         | - | 5 | 2 | 2 | 0.00 | 1.00 |
| Chr5:124273553-124273775  | 3 | DNA | GGCCGAGGTGCACTACCGGCRNG  | cGcCAGGcGcGcAGCaAGTCCGCAAG | + | 5 | 2 | 2 | 0.00 | 1.00 |
| Chr2:242848948-24284920   | 3 | RNA | GGCCGAGGTGCACTACCGGCRNG  | GGC-HtTgGATACCGCTGG        | + | 4 | 2 | 2 | 0.00 | 1.00 |
| Chr2:89511218-89511240    | 3 | RNA | GGCCGAGGTGCACTACCGGCRNG  | ttCCCAATgCGTt-CCGCGAG      | + | 5 | 2 | 2 | 0.00 | 1.00 |
| Chr4:167507325-167507347  | 3 | RNA | GGCCGAGGTGCACTACCGGCRNG  | GgGcAGaTCAcTcGgGcAAG       | + | 5 | 1 | 2 | 0.00 | 1.00 |
| Chr9:153190486-153190508  | 3 | DNA | GGCCGAGGTGCACTACCGGCRNG  | GGCCAGAGcCGAGTcCaGCGCTGG   | + | 5 | 2 | 2 | 0.00 | 1.00 |
| Chr4:123629510-123629532  | 3 | DNA | GGCCGAGGTGCACTACCGGCRNG  | GcCCGAGGcCaCaCCCGTGGCAG    | + | 4 | 2 | 2 | 0.00 | 1.00 |
| Chr1:216585878-216585900  | 5 | RNA | GGCCGAGGTGCACTACCGGCRNG  | GGC-AGGctGAGCaCCGCGGG      | - | 4 | 2 | 2 | 0.00 |      |

|                          |           |   |     |                          |                           |   |   |   |   |      |      |
|--------------------------|-----------|---|-----|--------------------------|---------------------------|---|---|---|---|------|------|
| Chr1:121846086-121846108 | 121846093 | 5 | RNA | GGCCGAGGTCGACTACCGGCNRG  | GGCTGAGaTh-AgaACCGCGGG    | - | 5 | 1 | 2 | 0.00 | 1.00 |
| Chr7:156838989-156839011 | 156839006 | 3 | RNA | GGCCGAGGTCGACTACCGGCNRG  | caCaaAGTGCCT-CCGGCCAG     | + | 5 | 1 | 2 | 0.00 | 1.00 |
| Chr8:15436603-15436625   | 15436620  | 3 | RNA | GGCCGAGGTCGACTACCGGCNRG  | GgCG-GGcCaCctCCGGCCGG     | + | 5 | 1 | 2 | 0.00 | 1.00 |
| Chr7:88111977-88111999   | 88111994  | 3 | DNA | GGCCGAGGTCGA-CTACCGGCNRG | aGCCGAGGCCTGATCgACCGaTGAG | + | 5 | 1 | 2 | 0.00 | 1.00 |
| Chr1:106347042-106347064 | 106347049 | 5 | RNA | GGCCGAGGTCGACTACCGGCNRG  | GGC-AGGaCGAaTaaGaCCGG     | - | 5 | 2 | 2 | 0.00 | 1.00 |
| Chr7:165223996-165224018 | 165224013 | 3 | RNA | GGCCGAGGTCGACTACCGGCNRG  | G-CCGAGGTCGAgctGgCGAG     | + | 5 | 1 | 2 | 0.00 | 1.00 |
| Chr3:220370964-220370986 | 220370981 | 3 | RNA | GGCCGAGGTCGACTACCGGCNRG  | GGC-HGcgGATACCGCTGG       | + | 5 | 2 | 2 | 0.00 | 1.00 |
| Chr8:4996049-4996071     | 4996056   | 5 | RNA | GGCCGAGGTCGACTACCGGCNRG  | ccCCgGGTGA-AaCGCCGAG      | - | 5 | 2 | 2 | 0.00 | 1.00 |
| Chr2:3969609-3969631     | 3969616   | 5 | RNA | GGCCGAGGTCGACTACCGGCNRG  | GGCCGAGGTC-ACtCgGGCTGG    | - | 5 | 1 | 2 | 0.00 | 1.00 |
| Chr4:176776870-176776892 | 176776877 | 5 | DNA | GGCCGAGGTCGACTACCGGCNRG  | GGTCGAGGTCGAgTcCpaGCCCTGG | - | 5 | 2 | 2 | 0.00 | 1.00 |
| Chr8:79847512-79847534   | 79847519  | 5 | RNA | GGCCGAGGTCGACTACCGGCNRG  | GgagGgGATCAGTCA-GgGAG     | - | 5 | 2 | 2 | 0.00 | 1.00 |
| Chr6:137270185-137270207 | 137270202 | 3 | RNA | GGCCGAGGTCGACTACCGGCNRG  | aGCCGAGGTCGCT-CgGGCAGG    | + | 5 | 1 | 2 | 0.00 | 1.00 |
| Chr1:65383212-65383234   | 65383229  | 3 | RNA | GGCCGAGGTCGACTACCGGCNRG  | cGCCGAGGTCGcCaa-GGCAGG    | + | 5 | 2 | 2 | 0.00 | 1.00 |
| Chr1:302484041-302484063 | 302484048 | 5 | RNA | GGCCGAGGTCGACTACCGGCNRG  | GcCtaAGGTCGAC-gCCGGCGGG   | - | 5 | 1 | 2 | 0.00 | 1.00 |
| Chr1:158686361-158686383 | 158686368 | 5 | RNA | GGCCGAGGTCGACTACCGGCNRG  | GgCgGgGTHgCT-CCGgAGG      | - | 5 | 1 | 2 | 0.00 | 1.00 |
| Chr4:146127556-146127578 | 146127573 | 3 | RNA | GGCCGAGGTCGACTACCGGCNRG  | GGCgHtGT-GaCaCCGGAAG      | + | 5 | 1 | 2 | 0.00 | 1.00 |
| Chr8:95686187-95686209   | 95686194  | 5 | RNA | GGCCGAGGTCGACTACCGGCNRG  | GGC-tcGgGACTACCGCTGG      | - | 5 | 2 | 2 | 0.00 | 1.00 |
| Chr6:19132057-19132079   | 19132074  | 3 | RNA | GGCCGAGGTCGACTACCGGCNRG  | GcCgGgGTCGACT--GgAGGG     | + | 5 | 2 | 2 | 0.00 | 1.00 |
| Chr5:59842963-59842985   | 59842980  | 3 | RNA | GGCCGAGGTCGACTACCGGCNRG  | G--CGAGaCaCaACaCaAGG      | + | 5 | 2 | 2 | 0.00 | 1.00 |
| Chr4:109179406-109179428 | 109179423 | 3 | RNA | GGCCGAGGTCGACTACCGGCNRG  | GTCGAGaCaC-CTAaCtGCGAG    | + | 4 | 2 | 2 | 0.00 | 1.00 |
| Chr7:68498628-68498650   | 68498645  | 3 | DNA | GGCCGAGGTCGACTACCGGCNRG  | GcCaGAGTCGgCACCATGGCCAG   | + | 5 | 2 | 2 | 0.00 | 1.00 |
| Chr3:157868846-157868868 | 157868863 | 3 | RNA | GGCCGAGGTCGACTACCGGCNRG  | aGCCAGGTCG--TAAaGCTGG     | + | 5 | 2 | 2 | 0.00 | 1.00 |
| Chr3:43610460-43610482   | 43610467  | 5 | RNA | GGCCGAGGTCGACTACCGGCNRG  | GGC-tcGaaGACTACCGCTGG     | - | 4 | 2 | 2 | 0.00 | 1.00 |
| Chr3:880380-880402       | 880387    | 5 | RNA | GGCCGAGGTCGACTACCGGCNRG  | GTCaGAG-TCGACctCgGGCGAG   | - | 5 | 1 | 2 | 0.00 | 1.00 |
| Chr7:12856794-12856816   | 12856801  | 5 | RNA | GGCCGAGGTCGACTACCGGCNRG  | aGCCGAGGTC-GgCaaCtGGCTGG  | - | 5 | 1 | 2 | 0.00 | 1.00 |
| Chr5:18497644-18497666   | 18497661  | 3 | RNA | GGCCGAGGTCGACTACCGGCNRG  | GGC-AGGcCGAgAACaaCCGG     | + | 5 | 2 | 2 | 0.00 | 1.00 |
| Chr8:96805245-96805267   | 96805262  | 3 | RNA | GGCCGAGGTCGACTACCGGCNRG  | GaCCGAGGTC-GAGcCaSaAGG    | + | 5 | 1 | 2 | 0.00 | 1.00 |
| Chr3:207124871-207124893 | 207124888 | 3 | RNA | GGCCGAGGTCGACTACCGGCNRG  | GGaCtAGGTGCG-TrCCaGHTGG   | + | 5 | 2 | 2 | 0.00 | 1.00 |
| Chr2:204542876-204542898 | 204542893 | 3 | RNA | GGCCGAGGTCGACTACCGGCNRG  | GGC-tcGgGACTACCGCTGG      | + | 4 | 2 | 2 | 0.00 | 1.00 |
| Chr4:117792293-117792315 | 117792300 | 5 | RNA | GGCCGAGGTCGACTACCGGCNRG  | G-attGgGTCGACaCgGGCGGG    | - | 5 | 1 | 2 | 0.00 | 1.00 |

**Supplementary Table 5.** CLEAVE-seq data and a shortlist of computationally predicted high ranked M2 sites with low number of mismatches and bulges. On-target site is shown on the top. RNA Bulges are shown as boxes, respectively. Mismatches are shown in color boxes.

| Site | Computational prediction |       | CLEAVE-Seq<br>reads<br>100nM | Sequence |    |    |    |    |    |    |    |    |    |    |   |   |   |   |   |   |   |   |   | Genomic Location |   |    |                          |
|------|--------------------------|-------|------------------------------|----------|----|----|----|----|----|----|----|----|----|----|---|---|---|---|---|---|---|---|---|------------------|---|----|--------------------------|
|      | Mismatch                 | Bulge |                              | 20       | 19 | 18 | 17 | 16 | 15 | 14 | 13 | 12 | 11 | 10 | 9 | 8 | 7 | 6 | 5 | 4 | 3 | 2 | 1 |                  | 0 | -1 | -2                       |
| 1    | 0                        | 0     | 227                          | G        | G  | C  | C  | G  | A  | G  | G  | T  | C  | G  | A | C | T | A | C | C | G | G | C | C                | G | G  | Chr9:143631773-143631795 |
| 2    | 1                        | 1     | 0                            |          |    |    |    |    |    |    |    |    |    |    |   |   |   |   |   |   |   |   |   |                  |   |    | Chr3:214572069-214572090 |
| 3    | 2                        | 1     | 0                            |          |    |    |    |    |    |    |    |    |    |    |   |   |   |   |   |   |   |   |   |                  |   |    | Chr3:216792332-216792353 |
| 4    | 2                        | 1     | 0                            |          |    |    |    |    |    |    |    |    |    |    |   |   |   |   |   |   |   |   |   |                  |   |    | Chr5:196093089-196093111 |
| 5    | 2                        | 1     | 0                            |          |    |    |    |    |    |    |    |    |    |    |   |   |   |   |   |   |   |   |   |                  |   |    | Chr5:219494224-219494245 |
| 6    | 2                        | 2     | 0                            |          |    |    |    |    |    |    |    |    |    |    |   |   |   |   |   |   |   |   |   |                  |   |    | Chr7:116040382-116040402 |
| 7    | 3                        | 0     | 0                            |          |    |    |    |    |    |    |    |    |    |    |   |   |   |   |   |   |   |   |   |                  |   |    | Chr4:173200547-173200569 |





**Supplementary Table 7.** MIPS genotyping of 390 T<sub>0</sub> maize plants generated from three different target sites and delivery methods. Any allele, mutant or WT represent >5% of total reads to be called an allele. Percent mutant alleles indicate total mutant alleles/total alleles from plants analyzed. Mosaic plants contain >2 alleles. Homozygous mutant plants contain single mutant allele with >90% reads

| Target Site | Transformation Method | Number of Plants Analyzed | Percent Mutant Alleles | Mosaic Plants | Homozygous WT Plants | Homozygous Mutant Plants | Heterozygous Mut/Mut Plants | Heterozygous WT/Mut Plants |
|-------------|-----------------------|---------------------------|------------------------|---------------|----------------------|--------------------------|-----------------------------|----------------------------|
| M1          | Agro                  | 26                        | 61.30%                 | 0.00%         | 46.20%               | 34.60%                   | 19.20%                      | 0.00%                      |
| M2          | DNA-particle gun      | 112                       | 95.90%                 | 8.10%         | 5.20%                | 34.90%                   | 45.90%                      | 5.80%                      |
|             | Agro                  | 117                       | 99.00%                 | 9.30%         | 0.00%                | 49.20%                   | 39.80%                      | 1.70%                      |
|             | RNP-particle gun      | 94                        | 33.30%                 | 0.00%         | 61.50%               | 15.40%                   | 15.40%                      | 7.70%                      |
| M3          | Agro                  | 41                        | 94.30%                 | 5.60%         | 8.30%                | 55.60%                   | 30.60%                      | 0.00%                      |
