# Supplementary material for: CRISPR-Cas9 Editing in Maize: Systematic Evaluation of Off-target Activity and Its Relevance in Crop Improvement
Source: Sci Rep. 2019 Apr 30;9:6729. doi: 10.1038/s41598-019-43141-6 (PMC6491584; doi:10.1038/s41598-019-43141-6)
Supplement: Supplementary file 2 — Supplementary Table 4 [file 41598_2019_43141_MOESM2_ESM.pdf]

Supplementary Table 4. Comprehensive list of cleaved genomic target sites detected from M2 guide RNA using CLEAVE-Seq

| Location                  | Cut Site  | CutSite_WRT_Target | MM_Type | DNA_Sequence              | RNA_Sequence                | Strand | Mismatches | Bulge Size | Normalized Read Count Rep 1 | Normalized Read Count Rep 2 | Avg CLEAVE-Seq Reads |
|---------------------------|-----------|--------------------|---------|---------------------------|-----------------------------|--------|------------|------------|-----------------------------|-----------------------------|----------------------|
| Chr5:37860732-37860754    | 37860737  | 3                  | RNA     | GGCCGAGGTGCACTACCGGCNRR   | tG-GGGTTCGACTACCGGCAGG      | -      | 2          | 2          | 469                         | 589.33                      | 529.17               |
| Chr9:143631773-143631795  | 143631790 | 3                  | RNA     | GGCCGAGGTGCACTACCGGCNRR   | GGCCGAGGTGCACTACCGGCCGG     | +      | 0          | 0          | 234                         | 220.31                      | 227.16               |
| Chr10:5286571-5286593     | 5286586   | 5                  | X       | GGCCGAGGTGCACTACCGGCNRR   | G-CCGCGGGCGACTACCGGCAGAG    | +      | 2          | 1          | 79                          | 143.20                      | 111.10               |
| Chr3:200475375-200475397  | 200475390 | 5                  | RNA     | GGCCGAGGTGCACTACCGGCNRR   | G-CCGCGGGCGACTACCGGCAGAG    | +      | 1          | 1          | 28                          | 68.85                       | 48.43                |
| Chr7:124810038-124810060  | 124810053 | 5                  | RNA     | GGCCGAGGTGCACTACCGGCNRR   | GGC-GAGGCGCACTACCGGCAGG     | +      | 5          | 1          | 25                          | 53.98                       | 39.49                |
| Chr5:62435814-62435830    | 62435830  | 4                  | RNA     | GGCCGAGGTGCACTACCGGCNRR   | a-CGAGA-TCGACaAaGcgGGG      | +      | 2          | 1          | 21                          | 31.94                       | 26.47                |
| Chr5:144051759-144051781  | 144051776 | 3                  | DNA     | GGCC-GAGGTGCACTACCGGCNRR  | GGcCTGAaGGGGAaTACCGGCTGG    | +      | 5          | 1          | 26                          | 12.67                       | 19.34                |
| Chr7:61544299-61544321    | 61544305  | 4                  | DNA     | GGC-CGAGGTGCACTACCGGCNRR  | GCTCGAGGGAaCaCTTCCGGCTGG    | -      | 4          | 1          | 13                          | 24.78                       | 18.89                |
| Chr2:152062830-152062852  | 152062846 | 4                  | RNA     | GGCCGAGGTGCACTACCGGCNRR   | GaCaG-GGTTCGACaAaGcgGGG     | +      | 5          | 1          | 1                           | 31.94                       | 16.47                |
| Chr10:84440789-84440811   | 84440794  | 3                  | RNA     | GGCCGAGGTGCACTACCGGCNRR   | a-CGAGGTGCGACaAaGcgGGG      | -      | 4          | 1          | 13                          | 19.83                       | 16.42                |
| Chr10:106127836-106127858 | 106127852 | 4                  | RNA     | GGCCGAGGTGCACTACCGGCNRR   | GaCaG-GGTTCGACaAaGcgGGG     | +      | 5          | 1          | 3                           | 29.19                       | 16.10                |
| Chr2:37363776-37363798    | 37363794  | 2                  | DNA     | GGCCC-GAGGTGCACTACCGGCNRR | GGCCCCAaGTGCTGCACACCGGCAGG  | +      | 2          | 1          | 20                          | 9.36                        | 14.68                |
| Chr5:69134156-69134178    | 69134163  | 5                  | RNA     | GGCCCGAGGTGCACTACCGGCNRR  | GG-GggaGcGCTTACCGCGCGG      | -      | 5          | 2          | 26                          | 0.00                        | 13.00                |
| Chr2:5864100-5864122      | 5864116   | 4                  | RNA     | GGCCGAGGTGCACTACCGGCNRR   | GGCTGGGGT-GaGTACGCGCGG      | +      | 4          | 1          | 10                          | 14.87                       | 12.44                |
| Chr6:166308906-166308928  | 166308922 | 4                  | RNA     | GGCCGAGGTGCACTACCGGCNRR   | GGCaGAGGTGCGA-TACCGCGCGG    | +      | 1          | 1          | 20                          | 20.00                       | 4.41                 |
| Chr3:33020604-33020626    | 33020609  | 3                  | RNA     | GGCCGAGGTGCACTACCGGCNRR   | GGaCG-GGTTCGACaAaGcgGGG     | -      | 5          | 1          | 2                           | 22.03                       | 12.02                |
| Chr1:259957715-259957737  | 259957732 | 3                  | X       | GGCCGAGGTGCACTACCGGCNRR   | GGCCGAGGTCTACCaAGCGCGCGG    | +      | 4          | 0          | 21                          | 2.20                        | 11.60                |
| Chr7:173232468-173232490  | 173232473 | 3                  | RNA     | GGCCGAGGTGCACTACCGGCNRR   | G-aCtAGaTTCGACTACCGCGGG     | -      | 3          | 1          | 11                          | 11.57                       | 11.29                |
| Chr2:80845034-80845056    | 80845049  | 5                  | RNA     | GGCCGAGGTGCACTACCGGCNRR   | G-CGAGGcGCACTACtCGCGG       | +      | 3          | 2          | 17                          | 4.41                        | 10.71                |
| Chr10:101131469-101131491 | 101131487 | 2                  | RNA     | GGCCGAGGTGCACTACCGGCNRR   | GgGcCGAG-CGctgACaGGCGGG     | +      | 5          | 2          | 3                           | 18.18                       | 10.59                |
| Chr7:119054025-119054047  | 119054032 | 5                  | RNA     | GGCCGAGGTGCACTACCGGCNRR   | GgCgcAGccAGCT-CCGGACAG      | -      | 5          | 1          | 7                           | 13.77                       | 10.39                |
| Chr3:232791371-232791393  | 232791387 | 4                  | RNA     | GGCCGAGGTGCACTACCGGCNRR   | a-CGcGGTTCGACaAaGcgGGG      | +      | 5          | 1          | 4                           | 16.52                       | 10.26                |
| Chr5:102819446-102819468  | 102819453 | 5                  | RNA     | GGCCGAGGTGCACTACCGGCNRR   | GGC-GAGaGGAaCaactCCGCGAG    | -      | 5          | 1          | 2                           | 17.62                       | 9.81                 |
| Chr1:17486818-17486840    | 17486825  | 4                  | DNA     | GGC-CGAGGTGCACTACCGGCNRR  | GcCTCGAGGcGCTA-GGRTGG       | -      | 4          | 1          | 19                          | 0.00                        | 9.50                 |
| Chr4:245455294-245455316  | 245455298 | 2                  | DNA     | GGCCGAGGTGCACTACCGGCNRR   | GGCCGAGGGGGAaTcCGGGCTGG     | -      | 5          | 1          | 0                           | 18.73                       | 9.37                 |
| Chr4:240239220-240239242  | 240239225 | 3                  | RNA     | GGCCGAGGTGCACTACCGGCNRR   | a-CGcGGTTCGACaAaGcgGGG      | -      | 5          | 1          | 11                          | 7.71                        | 9.36                 |
| Chr2:44981747-44981769    | 44981754  | 5                  | RNA     | GGCCGAGGTGCACTACCGGCNRR   | aCGCGAaTCAaCTACC-gGAG       | -      | 5          | 2          | 18                          | 0.00                        | 9.00                 |
| Chr1:53187763-53187785    | 53187770  | 5                  | RNA     | GGCCGAGGTGCACTACCGGCNRR   | GGCaATcTgGgCTA-GGCAAG       | -      | 5          | 2          | 18                          | 0.00                        | 9.00                 |
| Chr7:82662153-82662175    | 82662160  | 5                  | RNA     | GGCCGAGGTGCACTACCGGCNRR   | GtTcGgGaGcGT-CCGGCGAG       | -      | 5          | 1          | 18                          | 0.00                        | 9.00                 |
| Chr7:102664667-102664689  | 102664684 | 3                  | RNA     | GGCCGAGGTGCACTACCGGCNRR   | GaTCGAGGTG-GACGaCaagGAAG    | +      | 5          | 1          | 18                          | 0.00                        | 9.00                 |
| Chr9:54983896-54983918    | 54983902  | 4                  | RNA     | GGCCGAGGTGCACTACCGGCNRR   | GGC-AGGcCAaCTCCGCGCGG       | -      | 4          | 2          | 0                           | 17.62                       | 8.81                 |
| Chr3:152958354-152958376  | 152958369 | 5                  | RNA     | GGCCGAGGTGCACTACCGGCNRR   | cGgCGAaCTg-TACCGCGCGG       | +      | 5          | 2          | 0                           | 17.62                       | 8.81                 |
| Chr9:70745880-70745902    | 70745887  | 3                  | DNA     | GGC-CGAGGTGCACTACCGGCNRR  | GcCTCGAGGAGcGtTCCGGCTGG     | +      | 4          | 1          | 2                           | 15.42                       | 8.71                 |
| Chr2:197867817-197867839  | 197867833 | 4                  | RNA     | GGCCGAGGTGCACTACCGGCNRR   | a-CGcAGGTGCACTACCGGCNRR     | -      | 4          | 1          | 0                           | 7.16                        | 8.58                 |
| Chr5:134414881-134414903  | 134414887 | 4                  | RNA     | GGCCGAGGTGCACTACCGGCNRR   | GCGCGAGGTGCGACaAaT-CCGG     | -      | 5          | 1          | 0                           | 17.07                       | 0.04                 |
| Chr1:25488084-25488106    | 25488101  | 3                  | RNA     | GGC-CCGAGGTGCACTACCGGCNRR | GCTTCGAGTTCaAgAACCaGACAGG   | +      | 5          | 1          | 0                           | 17.07                       | 8.54                 |
| Chr4:100282684-100282706  | 100282690 | 4                  | X       | GGCCGAGGTGCACTACCGGCNRR   | GGAaGAGGTGgcCTAGCGGCTGG     | -      | 5          | 0          | 0                           | 17.07                       | 8.54                 |
| Chr5:99134781-99134803    | 99134798  | 3                  | RNA     | GGCCGAGGTGCACTACCGGCNRR   | GgCtCGaGtTCaA-ACCtGgCAG     | +      | 5          | 2          | 17                          | 0.00                        | 8.50                 |
| Chr4:220583733-220583755  | 220583749 | 4                  | X       | GGCCGAGGTGCACTACCGGCNRR   | GGCCGAGGTTCaATACtCGTGG      | +      | 4          | 0          | 3                           | 13.77                       | 8.39                 |
| Chr2:56588382-56588404    | 56588398  | 4                  | RNA     | GGCCGAGGTGCACTACCGGCNRR   | a-CGcGGTTCGACaAaGcgGGG      | +      | 5          | 1          | 0                           | 16.52                       | 8.26                 |
| Chr1:22858453-228584575   | 228584569 | 4                  | RNA     | GGCCGAGGTGCACTACCGGCNRR   | a-CGcGGTTCGACaAaGcgGGG      | +      | 5          | 1          | 5                           | 11.02                       | 8.01                 |
| Chr2:59843341-59843363    | 59843348  | 5                  | DNA     | GGC-CGAGGTGCACTACCGGCNRR  | GGGCTCGAGGAGcAaCTCAaGtCCCG  | -      | 5          | 2          | 16                          | 0.00                        | 8.00                 |
| Chr5:90344751-90344773    | 90344768  | 3                  | DNA     | GGCCGAGGTGCACTACCGGCNRR   | GGCCGAGGTGCACTACCGGCAGG     | +      | 5          | 1          | 16                          | 0.00                        | 8.00                 |
| Chr2:146608744-146608766  | 146608760 | 4                  | RNA     | GGCCGAGGTGCACTACCGGCNRR   | GCGaAGGtGAGTCTA-GGRTGG      | -      | 4          | 1          | 0                           | 15.97                       | 7.99                 |
| Chr5:52422323-52422345    | 52422330  | 4                  | RNA     | GGCCGAGGTGCACTACCGGCNRR   | GgGcGAGGc-CAaCTcCGGCGGG     | -      | 5          | 1          | 0                           | 15.97                       | 7.99                 |
| Chr7:19666173-19666195    | 19666188  | 5                  | RNA     | GGCCGAGGTGCACTACCGGCNRR   | GGC-HtGgAGTACCGGCTGG        | +      | 5          | 2          | 6                           | 9.91                        | 7.96                 |
| Chr2:187376830-187376852  | 187376848 | 2                  | RNA     | GGCCGAGGTGCACTACCGGCNRR   | G-CaGcGGcGAGaACCGGCGAG      | +      | 5          | 2          | 8                           | 7.71                        | 7.86                 |
| Chr6:42796472-42796494    | 42796478  | 4                  | RNA     | GGCCGAGGTGCACTACCGGCNRR   | G-CCGAGTAcAGTCTCGtCTGG      | -      | 5          | 1          | 9                           | 6.61                        | 7.81                 |
| Chr4:132703610-132703632  | 132703628 | 2                  | RNA     | GGCCGAGGTGCACTACCGGCNRR   | cGcgaAGTGA-GaGgCGAGG        | +      | 5          | 2          | 0                           | 15.42                       | 7.71                 |
| Chr6:82325146-82325168    | 82325152  | 4                  | RNA     | GGCCGAGGTGCACTACCGGCNRR   | GGC-tGcgGACTACCGTGG         | -      | 5          | 2          | 0                           | 15.42                       | 7.71                 |
| Chr2:5765592-5765614      | 5765610   | 2                  | RNA     | GGCCGAGGTGCACTACCGGCNRR   | GGC-AGGgTGaGTgGgCGGG        | +      | 5          | 2          | 0                           | 15.42                       | 7.71                 |
| Chr8:102976801-102976823  | 102976819 | 2                  | RNA     | GGCCGAGGTGCACTACCGGCNRR   | GGTCRGGTGCGAC-gGaaAGAG      | +      | 5          | 2          | 0                           | 15.42                       | 7.71                 |
| Chr8:90266557-90266579    | 90266572  | 5                  | DNA     | GGC-CGAGGTGCACTACCGGCNRR  | GGGCTTCGGTGGCAaCCCGCGGG     | +      | 5          | 2          | 0                           | 15.42                       | 7.71                 |
| Chr1:29132869-29132891    | 29132874  | 3                  | RNA     | GGCCGAGGTGCACTACCGGCNRR   | a-CGcGCTGGAGCaAaGcgGGG      | -      | 4          | 1          | 0                           | 15.42                       | 7.71                 |
| Chr3:147799357-147799379  | 147799362 | 3                  | RNA     | GGCCGAGGTGCACTACCGGCNRR   | a-CGcGGTTCGACaAaGcgGGG      | -      | 4          | 1          | 0                           | 15.42                       | 7.71                 |
| Chr6:133774274-133774296  | 133774291 | 3                  | DNA     | GGC-CGAGGTGCACTACCGGCNRR  | GcCTCGAGGAGcGtTCCGGCTGG     | +      | 4          | 1          | 11                          | 4.41                        | 7.71                 |
| Chr7:101947601-101947623  | 101947608 | 5                  | DNA     | GGC-CGAGGTGCACTACCGGCNRR  | GGCGCGgGcGTGCAaCTCGCGAGG    | -      | 5          | 1          | 15                          | 0.00                        | 7.50                 |
| Chr5:190861491-190861513  | 190861498 | 5                  | RNA     | GGCCGAGGTGCACTACCGGCNRR   | GtCtCGtGtTGAaCT-CCGGCTGG    | -      | 5          | 1          | 15                          | 0.00                        | 7.50                 |
| Chr8:137765681-137765703  | 137765688 | 5                  | RNA     | GGCCGAGGTGCACTACCGGCNRR   | GTCGGAaT-AaTACCGGaAAG       | -      | 5          | 2          | 15                          | 0.00                        | 7.50                 |
| Chr7:108353924-108353946  | 108353941 | 3                  | RNA     | GGCCGAGGTGCACTACCGGCNRR   | tGCCAGaGcGAaCTGctT-CCAG     | +      | 5          | 2          | 15                          | 0.00                        | 7.50                 |
| Chr3:2742482-2742504      | 2742489   | 5                  | DNA     | GGCCGAGGTGCACTACCGGCNRR   | aGCaGAGGTGGAaCTCGGaAGCGCAGG | +      | 4          | 2          | 15                          | 0.00                        | 7.50                 |
| Chr2:228111375-228111397  | 228111382 | 5                  | RNA     | GGCCGAGGTGCACTACCGGCNRR   | GaCCGAGGgGtGcCT-CgGGCTGG    | -      | 5          | 1          | 15                          | 0.00                        | 7.50                 |
| Chr2:139725408-139725430  | 139725425 | 3                  | RNA     | GGCCGAGGTGCACTACCGGCNRR   | GGCCaGTGGTTCGAaCTAttc-CCAG  | +      | 5          | 1          | 0                           | 14.87                       | 7.44                 |
| Chr7:42529888-42529910    | 42529903  | 5                  | RNA     | GGCCGAGGTGCACTACCGGCNRR   | aGc-HtGtGAGTGAaT-CCGCTAG    | +      | 4          | 2          | 0                           | 14.87                       | 7.44                 |
| Chr5:183185433-183185455  | 183185438 | 3                  | RNA     | GGCCGAGGTGCACTACCGGCNRR   | GGCCCGAGTCTCG-CTaGCaGAGG    | -      | 3          | 1          | 0                           | 14.87                       | 7.44                 |
| Chr4:202796965-202796987  | 202796980 | 5                  | RNA     | GGCCGAGGTGCACTACCGGCNRR   | tTCCG-GTCAaCTACCGGCGGG      | +      | 4          | 2          | 1                           | 13.77                       | 7.39                 |
| Chr4:142294326-142294348  | 142294343 | 3                  | DNA     | GGC-CGAGGTGCACTACCGGCNRR  | GcCTCGAGGAGcGtTCCGGCTGG     | +      | 4          | 1          | 4                           | 10.46                       | 7.23                 |
| Chr5:167972398-167972420  | 167972402 | 2                  | RNA     | GGCCGAGGTGCACTACCGGCNRR   | GgGCaG-TCGAGAGCAaGtGCTGG    | -      | 5          | 2          | 0                           | 14.32                       | 7.16                 |
| Chr2:238855968-238855990  | 238855984 | 4                  | RNA     | GGCCGAGGTGCACTACCGGCNRR   | GGAaGAGGgCGAaT-CCGGCGGG     | +      | 3          | 1          | 0                           | 14.32                       | 7.16                 |
| Chr8:167939418-167939440  | 167939422 | 2                  | RNA     | GGCCGAGGTGCACTACCGGCNRR   | Gg-GAGaTgaCTCTCGaGAGG       | -      | 5          | 2          | 0                           | 14.32                       | 7.16                 |
| Chr4:178023389-178023411  | 178023407 | 2                  | RNA     | GGCCGAGGTGCACTACCGGCNRR   | t-CGcGGTCTGCTAaCGtGAGG      | +      | 5          | 2          | 0                           | 14.32                       | 7.16                 |
| Chr2:85683422-85683448    | 85683428  | 4                  | RNA     | GGCCGAGGTGCACTACCGGCNRR   | GCTcAGG-CCGAGTACCGGCGGG     | -      | 5          | 1          | 0                           | 14.32                       | 7.16                 |
| Chr1:189492830-189492852  | 189492835 | 3                  | RNA     | GGCCGAGGTGCACTACCGGCNRR   | GgCtHgGtGAG-aCCGCGaAGG      | -      | 5          | 2          | 0                           | 14.32                       | 7.16                 |
| Chr5:209743451-209743473  | 209743468 | 3                  | RNA     | GGCCGAGGTGCACTACCGGCNRR   | GcCTCGaGtGCACTACCGGCNRR     | +      | 4          | 2          | 0                           | 14.32                       | 7.16                 |
| Chr10:142955448-142955470 | 142955465 | 3                  | RNA     | GGCCGAGGTGCACTACCGGCNRR   | GGCCGAGGcCGAG-CCcgaAGG      | +      | 5          | 2          | 14                          | 0.00                        | 7.00                 |
| Chr7:165223993-165224015  | 165224010 | 3                  | DNA     | G-GCCGAGGTGCACTACCGGCNRR  | GTACCGAGGcGcGAGaGtgcGGCGAG  | +      | 5          | 2          | 14                          | 0.00                        | 7.00                 |
| Chr4:220064080-220064102  | 220064097 | 3                  | RNA     | GGCCGAGGTGCACTACCGGCNRR   | tGCCAGTGTctgTACCGCGGG       | +      | 5          | 1          | 14                          | 0.00                        | 7.00                 |
| Chr8:93987706-93987728    | 93987723  | 3                  | RNA     | GGCCGAGGTGCACTACCGGCNRR   | GGCtCtCGaGcGgCGaCC-CCGG     | +      | 5          | 2          | 14                          | 0.00                        | 7.00                 |
| Chr7:125135211-125135233  | 125135216 | 3                  | DNA     | GGCCGAGGTGCGAT-TACCGGCNRR | GGCCaAGGcCAaCGACCGCGGG      | +      | 5          | 1          | 5                           | 8.81                        | 6.91                 |
| Chr6:77861766-77861788    | 77861782  | 4                  | RNA     | GGCCGAGGTGCACTACCGGCNRR   | GGC-tGcgaGACTACGcCTGG       | +      | 5          | 2          | 0                           | 13.77                       | 6.89                 |
| Chr2:18015029-18015051    | 18015033  | 2                  | RNA     | GGCCGAGGTGCACTACCGGCNRR   | GGCCGAGcTgAGTAT-GCGTGG      | -      | 4          | 1          | 0                           | 13.77                       | 6.89                 |
| Chr2:215736339-215736361  | 215736355 | 4                  | RNA     | GGCCGAGGTGCACTACCGGCNRR   | GGC-tGcgGACTACGcCTGG        | +      | 5          | 2          | 0                           | 13.77                       | 6.89                 |
| Chr10:148195714-148195736 | 148195730 | 4                  | RNA     | GGCCGAGGTGCACTACCGGCNRR   | GgGcCaAGTtGAGAT-CGagGAGG    | +      | 5          | 2          | 0                           | 13.77                       | 6.89                 |
| Chr10:77277596-77277618   | 77277613  | 3                  | RNA     | GGCCGAGGTGCACTACCGGCNRR   | aGcGAGGTGAGTAT-CCGCTAG      | +      | 4          | 2          | 0                           | 13.77                       | 6.89                 |
| Chr4:168992271-168992293  | 168992276 | 3                  | RNA     | GGCCGAGGTGCACTACCGGCNRR   | aGc-AGGcCAaCTCGaGtTGG       | -      | 5          | 2          | 0                           | 13.77                       | 6.89                 |
| Chr4:45623225-45623247    | 45623241  | 4                  | RNA     | GGCCGAGGTGCACTACCGGCNRR   | a-CGAGA-TCGACaAaGcgGGG      | +      | 5          | 1          | 0                           | 13.77                       | 6.89                 |
| Chr9:9413650-9413672      | 9413665   | 5                  | RNA     | GGCCGAGGTGCACTACCGGCNRR   | aGCCaAGTtg-CTcCGGCGGG       | +      | 5          | 2          | 0                           | 13.77                       | 6.89                 |
| Chr9:49772148-49772170    | 49772155  | 5                  | RNA     | GGCCGAGGTGCACTACCGGCNRR   | GGH-GAGGTGCGcGggCGGCTGG     | +      | 5          | 1          | 7                           | 6.61                        | 6.81                 |
| Chr10:32474621-32474643   | 32474626  | 3                  | RNA     | GGCCGAGGTGCACTACCGGCNRR   | tGCCGA-TAcACGCTCGGCGGG      | -      | 5          | 2          | 0                           | 13.22                       | 6.61                 |

|                           |   |     |                            |                            |   |   |   |    |       |      |
|---------------------------|---|-----|----------------------------|----------------------------|---|---|---|----|-------|------|
| Chr6:47560230-47560252    | 4 | RNA | GGCCGAGGTCGACTACCGGCGNRG   | G-aCGAGATCTGACaACgaGCGGG   | + | 5 | 1 | 0  | 12.12 | 6.06 |
| Chr1:113110081-113110103  | 5 | DNA | GGCCGAGGTCGACT-ACCGGCGNRG  | GGCTGGGAGACTGACaAGGCGGG    | - | 5 | 1 | 0  | 12.12 | 6.06 |
| Chr8:56668510-56668532    | 2 | RNA | aGCCGAGGTCGACTACCGGCGNRG   | aGCCGAGGTCGACTCGCTCGTG     | + | 5 | 2 | 0  | 12.12 | 6.06 |
| Chr3:158346111-158346133  | 3 | RNA | GGCCGAGGTCGACTACCGGCGNRG   | GGCCGgGtGgGAC--GgGGCCGG    | + | 5 | 2 | 0  | 12.12 | 6.06 |
| Chr6:160184621-160184643  | 3 | RNA | GGCCGAGGTCGACTACCGGCGNRG   | gaCC-AGGTCtCTCTCaCaCGAG    | + | 5 | 1 | 0  | 12.12 | 6.06 |
| Chr9:109053816-109053838  | 5 | RNA | GGCCGAGGTCGACTACCGGCGNRG   | G-IsAGGAGGTCGACTGAGGCGGG   | + | 5 | 1 | 0  | 12.12 | 6.06 |
| Chr5:17487623-17487645    | 3 | RNA | GGCCGAGGTCGACTACCGGCGNRG   | G-aCGAGGTCGACaACgagCGGG    | + | 5 | 1 | 0  | 12.12 | 6.06 |
| Chr6:101731284-101731306  | 4 | DNA | GGC- CGAGGTCGACTACCGGCGNRG | gcTCTGAGGgGcATCTCCGGCGGG   | - | 5 | 1 | 0  | 12.12 | 6.06 |
| Chr8:153226687-153226709  | 5 | RNA | GGCCGAGGTCGACTACCGGCGNRG   | ttCCGAIGTCGAITtg--GGCCGG   | - | 5 | 2 | 0  | 12.12 | 6.06 |
| Chr3:42113853-42113875    | 4 | RNA | GGCCGAGGTCGACTACCGGCGNRG   | GGCCGAcGcGAGtA--GaACGAG    | + | 5 | 2 | 0  | 12.12 | 6.06 |
| Chr1:164563816-164563838  | 5 | RNA | GGCCGAGGTCGACTACCGGCGNRG   | GGCaAGGTC-GAGcgCGGaAG      | + | 4 | 1 | 0  | 12.12 | 6.06 |
| Chr6:67380621-67380643    | 3 | RNA | GGCCGAGGTCGACTACCGGCGNRG   | GGCCGcGgaGACT-CTGGCGAG     | + | 3 | 1 | 12 | 0.00  | 6.00 |
| Chr9:79804613-79804635    | 3 | RNA | GGCCGAGGTCGACTACCGGCGNRG   | cGaGAGGTCa--TACCGCGCGG     | + | 4 | 2 | 12 | 0.00  | 6.00 |
| Chr2:57971352-57971374    | 3 | RNA | GGCCGAGGTCGACTACCGGCGNRG   | GgaCGAG--CGctgACaGgCGGG    | + | 5 | 2 | 12 | 0.00  | 6.00 |
| Chr6:75926787-75926809    | 3 | DNA | G-GCCGAGGTCGACTACCGGCGNRG  | GTtCTGAGATCGtCTAgCTGGCGG   | + | 5 | 1 | 12 | 0.00  | 6.00 |
| Chr9:105659733-105659755  | 5 | DNA | GGCCGAGGTCGACTACCGGCGNRG   | GGCCGAGGTCGACTGatGgCGGG    | - | 4 | 2 | 12 | 0.00  | 6.00 |
| Chr5:24959542-24959564    | 5 | RNA | GGCCGAGGTCGACTACCGGCGNRG   | GG--GAGGggGgCTCCGGCGGG     | - | 4 | 2 | 12 | 0.00  | 6.00 |
| Chr1:163300941-163300963  | 3 | RNA | GGCCGAGGTCGACTACCGGCGNRG   | GtgCGcGgaCG-CTACGCGCAGG    | + | 5 | 1 | 12 | 0.00  | 6.00 |
| Chr7:152918617-152918639  | 5 | DNA | GGCCGAGGTCGACTACCGGCGNRG   | cGcCaAGtCTGACaACGCGcCGG    | - | 5 | 1 | 12 | 0.00  | 6.00 |
| Chr9:133680153-133680175  | 3 | RNA | GGCCGAGGTCGACTACCGGCGNRG   | GGaCAGGTCG--TcCaattGtG     | + | 5 | 2 | 12 | 0.00  | 6.00 |
| Chr6:66171617-66171639    | 3 | RNA | GGCCGAGGTCGACTACCGGCGNRG   | G-aCGGGTCGACaACgaGCGGG     | + | 5 | 1 | 12 | 0.00  | 6.00 |
| Chr6:93690437-93690459    | 5 | RNA | GGCCGAGGTCGACTACCGGCGNRG   | ITCCGAGGAGC-ACtGCTGgAG     | + | 5 | 1 | 12 | 0.00  | 6.00 |
| Chr1:122673697-122673719  | 3 | RNA | GGCCGAGGTCGACTACCGGCGNRG   | GGCCGAGGTC-ACtGCTCaGaTAG   | - | 5 | 2 | 12 | 0.00  | 6.00 |
| Chr4:80762391-80762413    | 3 | RNA | GGCCGAGGTCGACTACCGGCGNRG   | G-aCGGGTCGACaACgaGCGGG     | + | 5 | 1 | 12 | 0.00  | 6.00 |
| Chr3:4545233-4545255      | 5 | RNA | GGCCGAGGTCGACTACCGGCGNRG   | G-aCGGGTCGACaACgaGCGGG     | - | 5 | 1 | 12 | 0.00  | 6.00 |
| Chr4:108794616-108794638  | 3 | RNA | GGCCGAGGTCGACTACCGGCGNRG   | IGGcA--tGtAgTACTAGGCTGAG   | + | 5 | 1 | 12 | 0.00  | 6.00 |
| Chr7:128072344-128072366  | 3 | RNA | GGCCGAGGTCGACTACCGGCGNRG   | G-aCGGGTCGACaACgaGCGGG     | + | 5 | 1 | 12 | 0.00  | 6.00 |
| Chr2:51154691-51154713    | 3 | RNA | GGCCGAGGTCGACTACCGGCGNRG   | GGCCGCG-GGtGTCACtGCGtGGG   | - | 4 | 1 | 12 | 0.00  | 6.00 |
| Chr4:116151160-116151182  | 3 | RNA | GGCCGAGGTCGACTACCGGCGNRG   | GggggAGGTAgtcGga--GGCTGG   | + | 5 | 2 | 12 | 0.00  | 6.00 |
| Chr2:6101136-6101158      | 5 | RNA | GGCCGAGGTCGACTACCGGCGNRG   | cGcCaAGGTCGAGgaA--GGtCAG   | + | 5 | 2 | 12 | 0.00  | 6.00 |
| Chr1:14880759-14880781    | 3 | RNA | GGCCGAGGTCGACTACCGGCGNRG   | GGC-aAGGTCGACgAGtGaTGG     | + | 5 | 1 | 12 | 0.00  | 6.00 |
| Chr8:27801455-27801477    | 5 | RNA | GGCCGAGGTCGACTACCGGCGNRG   | G-aCGAGGTCGAtgACaaGCGGG    | + | 5 | 1 | 12 | 0.00  | 6.00 |
| Chr5:120860746-120860768  | 2 | DNA | GGCCGAGGTCGACTACCGGCGNRG   | gGtCGAGGgCGgTcTACGCGCGGG   | + | 5 | 1 | 5  | 6.61  | 5.81 |
| Chr2:154881381-154881403  | 4 | RNA | GGCCGAGGTCGACTACCGGCGNRG   | aGCaGgGtCTCGACTAC-GGCCCG   | + | 4 | 1 | 0  | 11.57 | 5.79 |
| Chr3:199019683-199019705  | 3 | RNA | GGCCGAGGTCGACTACCGGCGNRG   | GGC--tcGgCGACaACgAGCTGG    | - | 5 | 2 | 0  | 11.57 | 5.79 |
| Chr4:113372151-113372173  | 3 | RNA | GGCCGAGGTCGACTACCGGCGNRG   | GCGCGAGGTCGAGtCTGAGCTGAG   | - | 5 | 1 | 12 | 0.00  | 5.79 |
| Chr6:154812669-154812691  | 2 | RNA | GGCCGAGGTCGACTACCGGCGNRG   | GCGcAGGtGtGACaAC--CGCGGG   | + | 5 | 2 | 0  | 11.57 | 5.79 |
| Chr4:159335495-159335517  | 3 | RNA | GGCCGAGGTCGACTACCGGCGNRG   | GCGtCtC--GACTACtGtAGCTGG   | - | 5 | 2 | 0  | 11.57 | 5.79 |
| Chr8:93012665-93012687    | 4 | RNA | GGCCGAGGTCGACTACCGGCGNRG   | G-aCGGGTCGACgACgaGCGGG     | + | 5 | 1 | 0  | 11.57 | 5.79 |
| Chr4:140692052-140692074  | 5 | RNA | GGCCGAGGTCGACTACCGGCGNRG   | GGC-GAGTCGACTACtaGAGG      | + | 5 | 1 | 0  | 11.57 | 5.79 |
| Chr3:232121528-232121550  | 2 | RNA | GGCCGAGGTCGACTACCGGCGNRG   | IG--GAGGagGAGaACCGCTAG     | + | 5 | 2 | 0  | 11.57 | 5.79 |
| Chr1:180423414-180423436  | 5 | RNA | GGCCGAGGTCGACTACCGGCGNRG   | GGC--HtGcgGATtACCGGCTGG    | + | 5 | 2 | 0  | 11.57 | 5.79 |
| Chr5:208880944-208880966  | 4 | RNA | GGCCGAGGTCGACTACCGGCGNRG   | GGcGcGaTaGcGCT--CGCGAAG    | + | 5 | 2 | 0  | 11.57 | 5.79 |
| Chr7:2295613-2295635      | 5 | DNA | GGCCGAGGTCGACTACCGGCGNRG   | GGCGgGtGtAGcTACTCTCCGGCGAG | - | 5 | 2 | 11 | 0.55  | 5.77 |
| Chr8:161124161-161124183  | 4 | DNA | GGC-GAGGTCGACTACCGGCGNRG   | GGCTCGAGGAGGTCtTCCGCTGG    | + | 4 | 1 | 6  | 5.51  | 5.76 |
| Chr4:33404700-33404722    | 2 | DNA | GGCCGAGGTCGACTACCGGCGNRG   | GGCCGAGGTCGACTACCGGCGNRG   | - | 5 | 1 | 6  | 5.51  | 5.71 |
| Chr2:145249710-145249732  | 4 | RNA | GGCCGAGGTCGACTACCGGCGNRG   | GgGcGACtGAGcGgC-AGgCGGAG   | - | 5 | 1 | 2  | 9.36  | 5.68 |
| Chr4:154376219-154376241  | 3 | RNA | GGCCGAGGTCGACTACCGGCGNRG   | GGCCGAtCTCG--cAGCaCAAG     | + | 5 | 2 | 8  | 3.30  | 5.65 |
| Chr6:144813984-144814006  | 5 | RNA | GGCCGAGGTCGACTACCGGCGNRG   | GtCtGAGtCTGACTtg--GgaTGG   | - | 5 | 2 | 10 | 1.10  | 5.55 |
| Chr2:169106015-169106037  | 5 | RNA | GGCCGAGGTCGACTACCGGCGNRG   | G-IGAGGTAattCAACCGGACAG    | + | 5 | 2 | 5  | 6.06  | 5.53 |
| Chr1:8065235-8065257      | 2 | RNA | GGCCGAGGTCGACTACCGGCGNRG   | GGCCa--GctGAGACCaGCTGG     | - | 5 | 2 | 0  | 11.02 | 5.51 |
| Chr4:130428771-130428793  | 3 | DNA | GGC-CGAGGTCGACTACCGGCGNRG  | gcTCTGAGGAGGtGtCTCCGCTGG   | + | 4 | 1 | 0  | 11.02 | 5.51 |
| Chr5:197998205-197998227  | 3 | RNA | GGCCGAGGTCGACTACCGGCGNRG   | GGCGtGGTCGAtgAG--GaAGG     | + | 5 | 2 | 0  | 11.02 | 5.51 |
| Chr7:105179774-105179796  | 3 | RNA | GGCCGAGGTCGACTACCGGCGNRG   | GGCCGAGGtcGGA--AggGGAGG    | + | 5 | 2 | 0  | 11.02 | 5.51 |
| Chr10:12176696-12176718   | 2 | RNA | GGCCGAGGTCGACTACCGGCGNRG   | GGCTCGgGcGAGg--CGGCGGG     | + | 5 | 2 | 0  | 11.02 | 5.51 |
| Chr9:10406323-10406345    | 3 | RNA | GGCCGAGGTCGACTACCGGCGNRG   | GGG--AGGCGAGTCTGAGGCTGAG   | - | 5 | 1 | 0  | 11.02 | 5.51 |
| Chr8:127021243-127021265  | 3 | RNA | GGCCGAGGTCGACTACCGGCGNRG   | G-aCGGGTCGACaACgaGCGGG     | - | 5 | 1 | 0  | 11.02 | 5.51 |
| Chr4:177107054-177107076  | 4 | DNA | GG-CCGAGGTCGACTACCGGCGNRG  | GGTCCGAGGTCGAGgtGAGCGCGAG  | + | 4 | 1 | 0  | 11.02 | 5.51 |
| Chr9:82008064-82008086    | 3 | RNA | GGCCGAGGTCGACTACCGGCGNRG   | GGaCGAGGcGcG--cAGgGGCAGG   | + | 5 | 2 | 0  | 11.02 | 5.51 |
| Chr1:118622125-118622147  | 2 | RNA | GGCCGAGGTCGACTACCGGCGNRG   | GGCCGAtCTCG--cAtCaGCAAG    | - | 5 | 2 | 0  | 11.02 | 5.51 |
| Chr10:150131590-150131612 | 4 | RNA | GGCCGAGGTCGACTACCGGCGNRG   | GGC--AGaCtCGAGACCaGCGAG    | - | 5 | 2 | 0  | 11.02 | 5.51 |
| Chr10:27044129-27044151   | 4 | RNA | GGCCGAGGTCGACTACCGGCGNRG   | GGGCGcGtCTGcGtGt--GCCAG    | - | 5 | 2 | 0  | 11.02 | 5.51 |
| Chr5:75886405-75886427    | 5 | RNA | GGCCGAGGTCGACTACCGGCGNRG   | GGC--tcGcgGAGTCAAGCTGCTG   | + | 5 | 2 | 0  | 11.02 | 5.51 |
| Chr4:215783270-215783292  | 2 | RNA | GGCCGAGGTCGACTACCGGCGNRG   | GGCCGgGtGtGAGC--GgGGCGCG   | - | 4 | 2 | 0  | 11.02 | 5.51 |
| Chr10:93909137-93909159   | 3 | RNA | GGCCGAGGTCGACTACCGGCGNRG   | gaTc-AGtCTGAGtACTCtGtAGG   | + | 5 | 1 | 0  | 11.02 | 5.51 |
| Chr10:70309314-70309336   | 3 | RNA | GGCCGAGGTCGACTACCGGCGNRG   | GGCGAGGTCGAGTCTGAGGCTGAG   | - | 5 | 1 | 0  | 11.02 | 5.51 |
| Chr1:30966896-30966918    | 4 | DNA | GGCCGAGGTCGACTACCGGCGNRG   | GaCGATGgGcGACgAGaCGGaAAG   | + | 5 | 1 | 0  | 11.02 | 5.51 |
| Chr8:154260387-154260409  | 5 | RNA | GGCCGAGGTCGACTACCGGCGNRG   | aGCCGtGtGTCGACTACC--CGGG   | - | 3 | 2 | 11 | 0.00  | 5.50 |
| Chr2:210393287-210393309  | 2 | RNA | GGCCGAGGTCGACTACCGGCGNRG   | GGaCGAGGcGc-ACTACTGCGCTGG  | - | 3 | 1 | 11 | 0.00  | 5.50 |
| Chr4:82363661-82363683    | 5 | RNA | GGCCGAGGTCGACTACCGGCGNRG   | cGaCGAGTCTGGA-TcCCGtGAG    | - | 5 | 1 | 11 | 0.00  | 5.50 |
| Chr8:152619574-152619596  | 5 | RNA | GGCCGAGGTCGACTACCGGCGNRG   | GaCGAGGCG-CAGCaCaagGaAGG   | - | 5 | 1 | 11 | 0.00  | 5.50 |
| Chr10:40287830-40287852   | 5 | RNA | GGCCGAGGTCGACTACCGGCGNRG   | caCCGAGTtGgAGTA--GGCAGG    | - | 5 | 2 | 11 | 0.00  | 5.50 |
| Chr4:46003613-46003635    | 5 | RNA | GGCCGAGGTCGACTACCGGCGNRG   | GagCGAG-TGtGtCAACGtCCAG    | - | 5 | 1 | 11 | 0.00  | 5.50 |
| Chr5:49117147-49117169    | 3 | RNA | GGCCGAGGTCGACTACCGGCGNRG   | GGCCGAGGgaCAGgAAC--CAAG    | + | 4 | 2 | 11 | 0.00  | 5.50 |
| Chr1:121497457-121497479  | 3 | RNA | GGCCGAGGTCGACTACCGGCGNRG   | GgaGc--TcTGGaACGtCCCG      | + | 5 | 2 | 11 | 0.00  | 5.50 |
| Chr2:224654169-224654191  | 3 | RNA | GGCCGAGGTCGACTACCGGCGNRG   | GGCGAGGTCGAGTCTGAGGCTGAG   | + | 5 | 1 | 11 | 0.00  | 5.50 |
| Chr8:162435245-162435267  | 3 | RNA | GGCCGAGGTCGACTACCGGCGNRG   | cGCGTCGAC--CGAGaGCTGAGGAG  | + | 5 | 2 | 11 | 0.00  | 5.50 |
| Chr6:161132228-161132250  | 5 | RNA | GGCCGAGGTCGACTACCGGCGNRG   | HtgCGtGGTCtCTTACC--CAGG    | - | 5 | 2 | 0  | 0.00  | 5.50 |
| Chr5:178967961-178967983  | 3 | DNA | GGCCG--AGGTCGACTACCGGCGNRG | ttGCCGAGAGTgAGgtTtCCGCGTAG | + | 5 | 2 | 11 | 0.00  | 5.50 |
| Chr1:71210030-71210052    | 5 | RNA | GGCCGAGGTCGACTACCGGCGNRG   | GGCcaGcGGTCGAC-AGtCGGcCGG  | - | 4 | 1 | 11 | 0.00  | 5.50 |
| Chr9:65874133-65874155    | 5 | RNA | GGCCGAGGTCGACTACCGGCGNRG   | GGC--AGGTCGtggcACtGcCGG    | - | 5 | 2 | 11 | 0.00  | 5.50 |
| Chr8:52557746-52557768    | 3 | RNA | GGCCGAGGTCGACTACCGGCGNRG   | cGCGGAGG--GAgTtCaGCGAG     | + | 4 | 2 | 11 | 0.00  | 5.50 |
| Chr7:145657742-145657764  | 5 | RNA | GGCCGAGGTCGACTACCGGCGNRG   | GtGtGtGGT-GaCCACCGCGGG     | - | 5 | 1 | 11 | 0.00  | 5.50 |
| Chr6:71767056-71767078    | 3 | RNA | GGCCGAGGTCGACTACCGGCGNRG   | GGCaGtGGA-CGACTCaCaGCGAG   | + | 4 | 1 | 11 | 0.00  | 5.50 |
| Chr6:97576679-97576701    | 3 | RNA | GGCCGAGGTCGACTACCGGCGNRG   | GGC--tcGcgGACTCGtCTGG      | + | 5 | 2 | 11 | 0.00  | 5.50 |
| Chr1:273889216-273889238  | 3 | RNA | GGCCGAGGTCGACTACCGGCGNRG   | GGCGAGGTCGAGTCTGAGGCTGAG   | - | 5 | 1 | 11 | 0.00  | 5.50 |
| Chr1:85262125-85262147    | 3 | RNA | GGCCGAGGTCGACTACCGGCGNRG   | GcCCGAGGTCGA--ACtGcgTGG    | - | 5 | 2 | 7  | 3.86  | 5.43 |
| Chr7:77522872-77522894    | 3 | RNA | GGCCGAGGTCGACTACCGGCGNRG   | GgaCtT--TGaAAtAGtCGGACAG   | - | 5 | 2 | 3  | 7.21  | 5.36 |
| Chr6:49789848-49789870    | 3 | RNA | GGCCGAGGTCGACTACCGGCGNRG   | GcCCGAGGgGaCaACC--gTGG     | - | 5 | 2 | 4  | 6.61  | 5.31 |
| Chr9:58610543-58610565    | 4 | RNA | GGCCGAGGTCGACTACCGGCGNRG   | GGCCGAGGtGgGcCT--CaagCGG   | + | 4 | 2 | 10 | 0.55  | 5.28 |
| Chr10:64036763-64036785   | 3 | RNA | GGCCGAGGTCGACTACCGGCGNRG   | GGC--AGGcCGAGcActGcCGCG    | - | 5 | 2 | 0  | 10.46 | 5.23 |
| Chr8:11633727-11633749    | 3 | RNA | GGCCGAGGTCGACTACCGGCGNRG   | GGC--tcGcgGACTACGtCTGG     | - | 5 | 2 | 0  | 10.46 | 5.23 |
| Chr2:194946823-194946845  | 5 | RNA | GGCCGAGGTCGACTACCGGCGNRG   | GGC--AGGcCGAGcActGcCGCG    | - | 5 | 2 | 0  | 10.46 | 5.23 |
| Chr10:5403108-5403130     | 3 | RNA | GGCCGAGGTCGACTACCGGCGNRG   | GGC-GtGGTcGGAAtCCGcCTGG    | + | 4 | 1 | 0  | 10.46 | 5.23 |
| Chr9:52767017-52767039    | 4 | RNA | GGCCGAGGTCGACTACCGGCGNRG   | GGCCGAGTCTGtGtGt--GCCCG    | - | 5 | 2 | 0  | 10.46 | 5.23 |
| Chr10:99887435-99887457   | 2 | RNA | GGCCGAGGTCGACTACCGGCGNRG   | GcCGAGTCTGtGtGtGtGtGAG     | + | 5 | 2 | 0  | 10.46 | 5.23 |
| Chr4:35078794-35078816    | 3 | RNA | GGCCGAGGTCGACTACCGGCGNRG   | GgGcGc-GGcCaCcttCCGCGGG    | + | 5 | 1 | 0  | 10.46 | 5.23 |
| Chr4:42312088-42312110    | 4 | RNA | GGCCGAGGTCGACTACCGGCGNRG   | GGtCaAGG-CACTAGCaGcAGAG    | + | 5 | 1 | 0  | 10.46 | 5.23 |
| Chr9:156369685-156369707  | 4 | RNA | GGCCGAGGTCGACTACCGGCGNRG   | GgGcG-GGcCaCcttCCGCGGG     | + | 5 | 1 | 0  | 10.46 | 5.23 |
| Chr2:152782016-152782038  | 5 | RNA | GGCCGAGGTCGACTACCGGCGNRG   | a-CGaACGAGCaACCGGACAG      | + | 4 | 2 | 0  | 10.46 | 5.23 |
| Chr6:125744945-125744967  | 5 | RNA | GGCCG                      |                            |   |   |   |    |       |      |

|                           |   |     |                           |                            |   |   |   |    |      |      |
|---------------------------|---|-----|---------------------------|----------------------------|---|---|---|----|------|------|
| Chr1:117864051-117864073  | 3 | RNA | GGCCGAGGTCGACTACCGGNNRG   | GGCCGAGCtaGgC-GgGCCGG      | + | 4 | 2 | 10 | 0.00 | 5.00 |
| Chr1:106937550-106937572  | 3 | RNA | GGCCGAGGTCGACTACCGGNNRG   | GcCCGAGGgCaACACC-gTGG      | + | 5 | 2 | 10 | 0.00 | 5.00 |
| Chr7:178519715-178519737  | 5 | RNA | GGCCGAGGTCGACTACCGGNNRG   | GTCCC-GaaGaaATgACCC-gTGG   | - | 5 | 2 | 10 | 0.00 | 5.00 |
| Chr3:98731345-98731367    | 5 | RNA | GGCCGAGGTCGACTACCGGNNRG   | GTCCC-gTgCaACCCGgACAG      | - | 5 | 2 | 10 | 0.00 | 5.00 |
| Chr1:286311129-286311151  | 5 | RNA | GGCCGAGGTCGACTACCGGNNRG   | GfGCaAGGtHGataa-GGCGAG     | + | 5 | 2 | 10 | 0.00 | 5.00 |
| Chr8:57911346-57911368    | 5 | RNA | GGCCGAGGTCGACTACCGGNNRG   | G-CcCGAGGtGAGTACGgAG       | - | 5 | 1 | 10 | 0.00 | 5.00 |
| Chr6:53635479-53635501    | 3 | RNA | GGCCGAGGTCGACTACCGGNNRG   | G-CGAGGgCGACgAGGtGG        | + | 5 | 2 | 10 | 0.00 | 5.00 |
| Chr6:123490784-123490806  | 3 | RNA | GGCCGAGGTCGACTACCGGNNRG   | aGCaAGAG-CGAAwgCCGCTGG     | - | 5 | 2 | 10 | 0.00 | 5.00 |
| Chr10:13540353-13540375   | 3 | RNA | GGCCGAGGTCGACTACCGGNNRG   | GHTCGGStG-AgATCCtCGCGG     | + | 5 | 1 | 10 | 0.00 | 5.00 |
| Chr2:195438829-195438851  | 3 | RNA | GGCCGAGGTCGACTACCGGNNRG   | aaCCAGAGGCaAG-ACCGcCTAG    | + | 5 | 2 | 10 | 0.00 | 5.00 |
| Chr10:39102347-39102369   | 5 | RNA | GGCCGAGGTCGACTACCGGNNRG   | GGtCGGtCTCGAC-ACgaGCTGG    | - | 5 | 1 | 10 | 0.00 | 5.00 |
| Chr2:164611581-164611603  | 5 | RNA | GGCCGAGGTCGACTACCGGNNRG   | atCTGgGT-GAACACCGCGCGG     | - | 5 | 1 | 10 | 0.00 | 5.00 |
| Chr4:45652247-45652269    | 5 | RNA | GGCCGAGGTCGACTACCGGNNRG   | GGC-AGGcGAGaACCGCGCGG      | - | 3 | 2 | 10 | 0.00 | 5.00 |
| Chr6:97520676-97520698    | 3 | RNA | GGCCGAGGTCGACTACCGGNNRG   | GGCCG-GGcGtCCaACCGCGCGG    | + | 4 | 1 | 10 | 0.00 | 5.00 |
| Chr7:147283183-147283205  | 3 | RNA | GGCCGAGGTCGACTACCGGNNRG   | GGC-tGcgGATtACCGCTGG       | + | 5 | 2 | 10 | 0.00 | 5.00 |
| Chr1:439322-439344        | 5 | DNA | GGCCGAGGTCGACTACCGGNNRG   | GGCCGAGGgGtCTGCGGAG        | - | 5 | 1 | 10 | 0.00 | 5.00 |
| Chr1:103542857-103542879  | 3 | DNA | GGC-CGAGGTCGACTACCGGNNRG  | GGCCGAGAGtGACaAGaCCGCGAG   | + | 5 | 2 | 10 | 0.00 | 5.00 |
| Chr6:140378297-140378319  | 3 | RNA | GGCCGAGGTCGACTACCGGNNRG   | caCCAGGtCGACTT-GGCGGG      | - | 5 | 2 | 0  | 9.91 | 4.96 |
| Chr4:138289221-138289343  | 5 | DNA | GGCCGAGGTCGACTACCGGNNRG   | GGCCGAGAGtCTcTctCGAGAGCCCG | + | 5 | 2 | 0  | 9.91 | 4.96 |
| Chr4:158402256-158402278  | 2 | RNA | GGCCGAGGTCGACTACCGGNNRG   | GGaCG-GTcCaAGCTtGgAG       | - | 5 | 2 | 0  | 9.91 | 4.96 |
| Chr2:204784597-204784619  | 5 | RNA | GGCCGAGGTCGACTACCGGNNRG   | GcGAGGcttGAC-CCGTCAAG      | + | 5 | 2 | 0  | 9.91 | 4.96 |
| Chr9:124699320-124699342  | 4 | DNA | GGCCGAGGTCGACT-ACCGGNNRG  | GGCtAGGtGACTGtCCGGCTGG     | - | 5 | 2 | 0  | 9.91 | 4.96 |
| Chr4:73619090-73619112    | 4 | RNA | GGCCGAGGTCGACTACCGGNNRG   | G-aCGGtCGTGCaCaAGcGGCGG    | + | 5 | 1 | 0  | 9.91 | 4.96 |
| Chr3:174099641-174099663  | 4 | DNA | GGCCGAGGTCGACTACCGGNNRG   | GcGgAGGtTgGtACTaAGGtCAG    | + | 5 | 1 | 0  | 9.91 | 4.96 |
| Chr3:96583646-96583668    | 2 | RNA | GGCCGAGGTCGACTACCGGNNRG   | GGCCCGAGG-GgtAGtGAGCTGG    | - | 5 | 2 | 0  | 9.91 | 4.96 |
| Chr4:13012593-13012615    | 5 | RNA | GGCCGAGGTCGACTACCGGNNRG   | GGC-GtAGtGtGtGtGAGgAG      | - | 4 | 2 | 0  | 9.91 | 4.96 |
| Chr5:93537567-93537589    | 3 | RNA | GGCCGAGGTCGACTACCGGNNRG   | GGCCGAGGtCTcTCT-cGgGCTGG   | - | 4 | 1 | 0  | 9.91 | 4.96 |
| Chr9:128563722-128563744  | 3 | DNA | GGCCGAGGTCGACTACCGGNNRG   | GggGAGAGTtTGCAGTCTcTcCGAG  | - | 5 | 2 | 0  | 9.91 | 4.96 |
| Chr3:170087571-170087593  | 4 | RNA | GGCCGAGGTCGACTACCGGNNRG   | GaCCGAGG-GCAGaCaAGaAGG     | - | 5 | 1 | 0  | 9.91 | 4.96 |
| Chr4:144380215-144380237  | 2 | RNA | GGCCGAGGTCGACTACCGGNNRG   | GGCCGAGGtTgGtTgCC-IGAG     | + | 5 | 2 | 0  | 9.91 | 4.96 |
| Chr10:150293314-150293336 | 3 | DNA | GGCCGAGGTCGACTACCGGNNRG   | aGacGAGGtTTCGACaAGgCGGAGG  | + | 5 | 2 | 0  | 9.91 | 4.96 |
| Chr7:152524654-152524676  | 5 | RNA | GGCCGAGGTCGACTACCGGNNRG   | GGCaGtGGTGG-TCtCCgAGGG     | + | 5 | 2 | 0  | 9.91 | 4.96 |
| Chr5:115554458-115554480  | 4 | RNA | GGCCGAGGTCGACTACCGGNNRG   | GGtCGAGtCGA-ACtCtgGGG      | - | 5 | 2 | 0  | 9.91 | 4.96 |
| Chr6:150089663-150089685  | 4 | RNA | GGCCGAGGTCGACTACCGGNNRG   | GaCC-AGGTCGAGgttCGCGGG     | - | 5 | 1 | 0  | 9.91 | 4.96 |
| Chr5:60029242-60029264    | 3 | RNA | GGCCGAGGTCGACTACCGGNNRG   | GGCCGAGGtGtGtGtGtGtGtGtG   | + | 5 | 2 | 0  | 9.91 | 4.96 |
| Chr7:67938984-67939006    | 2 | RNA | GGCCGAGGTCGACTACCGGNNRG   | GcCGAGGgA-ACtCTCGGCGG      | - | 4 | 2 | 0  | 9.91 | 4.96 |
| Chr5:205219580-205219602  | 2 | RNA | GGCCGAGGTCGACTACCGGNNRG   | GGC-GAAGTCTGAGaGtCCtCGAG   | - | 5 | 1 | 0  | 9.91 | 4.96 |
| Chr4:27992760-27992782    | 4 | RNA | GGCCGAGGTCGACTACCGGNNRG   | G-aCGGtGTCGACaAGcGCGGG     | + | 5 | 1 | 0  | 9.91 | 4.96 |
| Chr1:216532936-216532958  | 2 | RNA | GGCCGAGGTCGACTACCGGNNRG   | GGCCGAGtTgGtGtTA-GgGCTGG   | + | 5 | 2 | 0  | 9.91 | 4.96 |
| Chr9:36909819-36909841    | 2 | RNA | GGCCGAGGTCGACTACCGGNNRG   | GgAGaAGGTCaAC-ACctcCAGG    | + | 5 | 1 | 0  | 9.91 | 4.96 |
| Chr5:67199808-67199830    | 3 | DNA | GGCCGAGGTCGACTACCGGNNRG   | GGGCaGAGTGTGtGgCaAGGCGCGG  | + | 5 | 2 | 1  | 8.81 | 4.91 |
| Chr4:68033576-68033598    | 3 | RNA | GGCCGAGGTCGACTACCGGNNRG   | TgGtTAGGgA-GACTACCGCTGG    | - | 4 | 1 | 7  | 2.75 | 4.88 |
| Chr1:247722181-247722203  | 4 | RNA | GGCCGAGGTCGACTACCGGNNRG   | a-CCGCGaGACTACtCCtCCG      | - | 5 | 1 | 0  | 9.91 | 4.68 |
| Chr10:88759429-88759451   | 2 | DNA | GGCCGAGGTCG-ACTACCGGNNRG  | GGCCGAGGtCGAAGcGtCGGCTGG   | + | 4 | 1 | 0  | 9.91 | 4.68 |
| Chr5:213831551-213831573  | 3 | RNA | GGCCGAGGTCGACTACCGGNNRG   | GGC-AGGgGtAGtTgGTCGGGG     | + | 5 | 2 | 0  | 9.91 | 4.68 |
| Chr1:521369710-521369732  | 4 | RNA | GGCCGAGGTCGACTACCGGNNRG   | GGC-GAGTCTGtTgGtGAGGAG     | - | 5 | 2 | 0  | 9.91 | 4.68 |
| Chr2:184496767-184496789  | 5 | RNA | GGCCGAGGTCGACTACCGGNNRG   | GTCCG-gTgCaACCCGgACAG      | - | 5 | 2 | 0  | 9.91 | 4.68 |
| Chr1:228514745-228514767  | 3 | RNA | GGCCGAGGTCGACTACCGGNNRG   | GGCCAGGAGGgAG-TcTtCGtCGAG  | - | 5 | 1 | 0  | 9.91 | 4.68 |
| Chr1:2293685-2293707      | 3 | RNA | GGCCGAGGTCGACTACCGGNNRG   | G-CcAGGtTgAGCaAGtCtGCTGG   | + | 5 | 1 | 0  | 9.91 | 4.68 |
| Chr10:16554047-16554069   | 4 | RNA | GGCCGAGGTCGACTACCGGNNRG   | G-aCGGtGTCGACaAGaGCGGG     | + | 5 | 1 | 0  | 9.91 | 4.68 |
| Chr9:143499886-143500008  | 2 | RNA | GGCCGAGGTCGACTACCGGNNRG   | GG-GAaGtCGAGTgCTGCaGAG     | + | 5 | 2 | 0  | 9.91 | 4.68 |
| Chr1:158090635-158090657  | 2 | RNA | GGCCGAGGTCGACTACCGGNNRG   | GgGcGAGGtGgCatgTA-GGGTGG   | + | 5 | 1 | 0  | 9.91 | 4.68 |
| Chr1:154432586-154432608  | 2 | RNA | GGCCGAGGTCGACTACCGGNNRG   | GGCCGAG-CcGtCaAGGCGGG      | + | 4 | 2 | 0  | 9.91 | 4.68 |
| Chr2:161607900-161607922  | 3 | RNA | GGCCGAGGTCGACTACCGGNNRG   | GGCCGAGGtGAGtGtGtGtGtGtG   | - | 5 | 2 | 0  | 9.91 | 4.68 |
| Chr4:64043402-64043424    | 4 | RNA | GGCCGAGGTCGACTACCGGNNRG   | GgGtCGgGtTgGtCT-CGGGAGG    | - | 5 | 2 | 0  | 9.91 | 4.68 |
| Chr1:146058732-146058754  | 4 | RNA | GGCCGAGGTCGACTACCGGNNRG   | G-aCGGtGTCGACaAGcGCGGG     | - | 4 | 2 | 0  | 9.91 | 4.68 |
| Chr8:22695348-22695370    | 4 | RNA | GGCCGAGGTCGACTACCGGNNRG   | GGCCAGAGGAGCaCaAC-CAAG     | + | 5 | 2 | 0  | 9.91 | 4.68 |
| Chr1:3849157-3849179      | 5 | RNA | GGCCGAGGTCGACTACCGGNNRG   | GtAGGtGtCT-CTACCGCGCCG     | + | 4 | 2 | 0  | 9.91 | 4.68 |
| Chr4:238876534-238876556  | 3 | RNA | GGCCGAGGTCGACTACCGGNNRG   | GGCCGAGtGtG-TCtGcGcCAGG    | - | 5 | 2 | 0  | 9.91 | 4.68 |
| Chr8:78722620-78722642    | 2 | RNA | GGCCGAGGTCGACTACCGGNNRG   | ttCCGAG-CagCTAaCGCGAG      | + | 5 | 2 | 0  | 9.91 | 4.68 |
| Chr4:144606847-144606869  | 2 | RNA | GGCCGAGGTCGACTACCGGNNRG   | GaCCGAGG-CGACgAaCaAGaAG    | - | 5 | 1 | 0  | 9.91 | 4.68 |
| Chr5:78742960-78742982    | 3 | RNA | GGCCGAGGTCGACTACCGGNNRG   | c-CGAGtTgAGtCTGgCGCGAG     | + | 5 | 2 | 0  | 9.91 | 4.68 |
| Chr8:96590069-96590091    | 3 | X   | GGCCGAGGTCGACTACCGGNNRG   | GcCCaAGGAGCaCatCtCGCGCGG   | - | 5 | 0 | 0  | 9.91 | 4.68 |
| Chr1:163321856-163321878  | 2 | RNA | GGCCGAGGTCGACTACCGGNNRG   | ttCtCGAGGtTGAGTgTCC-IGAG   | + | 4 | 1 | 0  | 9.91 | 4.68 |
| Chr2:99680837-99680859    | 3 | RNA | GGCCGAGGTCGACTACCGGNNRG   | GCTCaAG-TCCAGaAGtGAGCAG    | + | 5 | 1 | 0  | 9.91 | 4.68 |
| Chr2:21931085-21931107    | 4 | RNA | GGCCGAGGTCGACTACCGGNNRG   | ttCCGAGGtGATtGtGtGtGtGtG   | - | 5 | 2 | 0  | 9.91 | 4.68 |
| Chr5:61784087-61784109    | 4 | RNA | GGCCGAGGTCGACTACCGGNNRG   | G-aCGGtGTCGACaAGcGCGGG     | - | 5 | 1 | 0  | 9.91 | 4.68 |
| Chr1:246411365-246411387  | 3 | RNA | GGCCGAGGTCGACTACCGGNNRG   | GGCCaAHTTGCtCTC-GCCGG      | - | 5 | 2 | 0  | 9.91 | 4.68 |
| Chr9:87557604-87557626    | 2 | DNA | GGCCGAG-GTCGACTACCGGNNRG  | GtTCGAGGTCaAGaGtAGCGAAG    | - | 5 | 1 | 0  | 9.91 | 4.68 |
| Chr7:138229160-138229182  | 4 | RNA | GGCCGAGGTCGACTACCGGNNRG   | tcCGGtGATTCG-cACCaGCCAG    | + | 5 | 2 | 0  | 9.91 | 4.68 |
| Chr4:139245577-139245599  | 3 | RNA | GGCCGAGGTCGACTACCGGNNRG   | GagCGAG-aGACaAGCTGCTGG     | - | 4 | 2 | 0  | 9.91 | 4.68 |
| Chr3:98763891-98763913    | 3 | RNA | GGCCGAGGTCGACTACCGGNNRG   | cAGcGgGTCGtGtCT-CCGCTGG    | + | 4 | 2 | 0  | 9.91 | 4.68 |
| Chr8:69628163-69628185    | 2 | DNA | GGCCGAGGTCGGA-CTACCGGNNRG | GgGtCaTtCGATtTCTACCGCGGAG  | + | 5 | 2 | 0  | 9.91 | 4.68 |
| Chr7:11948366-11948388    | 3 | RNA | GGCCGAGGTCGACTACCGGNNRG   | GTCCG-gTgCaACCGGtAG        | - | 5 | 2 | 0  | 9.91 | 4.68 |
| Chr7:180826397-180826419  | 4 | DNA | GGCCGAGGTCGACTACCGGNNRG   | GGTCaAGGtGtCaACtCAGCGCAG   | - | 5 | 1 | 0  | 9.91 | 4.68 |
| Chr7:141948844-141948866  | 2 | RNA | GGCCGAGGTCGACTACCGGNNRG   | GGCCGAGGTC-GgAgCGGAGG      | - | 5 | 2 | 0  | 9.91 | 4.68 |
| Chr1:7417887-7417909      | 2 | RNA | GGCCGAGGTCGACTACCGGNNRG   | GGC-GcGgGTCGAGgTCGtGtGtG   | - | 5 | 1 | 0  | 9.91 | 4.68 |
| Chr6:118300599-118300621  | 4 | RNA | GGCCGAGGTCGACTACCGGNNRG   | GGC-ttGgGtGACTACCGTtGG     | - | 5 | 2 | 0  | 9.91 | 4.68 |
| Chr3:77262867-77262889    | 4 | RNA | GGCCGAGGTCGACTACCGGNNRG   | G-aCGGtGTCGACaAGaGCGGG     | + | 5 | 1 | 0  | 9.91 | 4.68 |
| Chr9:27097749-27097771    | 3 | X   | GGCCGAGGTCGACTACCGGNNRG   | GGAAGAGtGAGCaGACaCaGcCAG   | + | 5 | 0 | 0  | 9.91 | 4.68 |
| Chr4:151090887-151090909  | 2 | RNA | GGCCGAGGTCGACTACCGGNNRG   | GGCCAGAGCaCaAGa-CCcCAG     | - | 4 | 2 | 0  | 9.91 | 4.68 |
| Chr4:141042986-141043008  | 4 | RNA | GGCCGAGGTCGACTACCGGNNRG   | G-aCGGtGTCGACaAGaGCGGG     | + | 5 | 1 | 1  | 8.26 | 4.63 |
| Chr2:40890230-40890252    | 2 | DNA | GGCCGAGGTCGACTACCGGNNRG   | GtCCCGAGtCaACTACCGCGCGG    | + | 4 | 1 | 3  | 6.06 | 4.53 |
| Chr3:227789873-227789895  | 3 | RNA | GGCCGAGGTCGACTACCGGNNRG   | GGCAGAGGtGtGtGtAa-GGCAG    | - | 5 | 1 | 3  | 6.06 | 4.53 |
| Chr1:20944079-20944101    | 3 | RNA | GGCCGAGGTCGACTACCGGNNRG   | GGC-gGSCaACtCCCGCCGG       | + | 5 | 2 | 9  | 0.00 | 4.50 |
| Chr10:53678961-53678983   | 3 | RNA | GGCCGAGGTCGACTACCGGNNRG   | GGCCGAGGTCGACTACCGGNNRG    | + | 5 | 2 | 9  | 0.00 | 4.50 |
| Chr7:69146911-69146933    | 5 | RNA | GGCCGAGGTCGACTACCGGNNRG   | GtCtGgGTCGtGtGTA-GGCTGG    | - | 5 | 2 | 9  | 0.00 | 4.50 |
| Chr3:5776932-5776934      | 3 | RNA | GGCCGAGGTCGACTACCGGNNRG   | cGCaAGGAG-ACtACaAGGcCAGG   | + | 5 | 1 | 9  | 0.00 | 4.50 |
| Chr7:58504461-58504483    | 3 | RNA | GGCCGAGGTCGACTACCGGNNRG   | GGCCGAGtTCG-cAtCaCAAG      | + | 5 | 2 | 9  | 0.00 | 4.50 |
| Chr7:113839294-113839316  | 3 | RNA | GGCCGAGGTCGACTACCGGNNRG   | aaAGCAGGtTgGtGTA-GHtCAAG   | + | 5 | 2 | 9  | 0.00 | 4.50 |
| Chr2:79782349-79782371    | 3 | RNA | GGCCGAGGTCGACTACCGGNNRG   | GgGcG-GGcCaCCcCGCGCGG      | + | 5 | 1 | 9  | 0.00 | 4.50 |
| Chr9:149956927-149956949  | 3 | RNA | GGCCGAGGTCGACTACCGGNNRG   | GGtGtGtGtGtGtGtGtGtGtGtG   | + | 5 | 2 | 9  | 0.00 | 4.50 |
| Chr6:40897005-40897027    | 5 | RNA | GGCCGAGGTCGACTACCGGNNRG   | t-CGAGGtCaACtCaAGGCGGG     | - | 5 | 2 | 9  | 0.00 | 4.50 |
| Chr6:98810749-98810771    | 5 | RNA | GGCCGAGGTCGACTACCGGNNRG   | GgGtCGAGtCTCACTAG-GGGTGG   | - | 3 | 1 | 9  | 0.00 | 4.50 |
| Chr10:73879415-73879437   | 3 | RNA | GGCCGAGGTCGACTACCGGNNRG   | GGCCGtGtT-CcACtGCGCGG      | + | 5 | 2 | 9  | 0.00 | 4.50 |
| Chr4:65946711-65946733    | 5 | RNA | GGCCGAGGTCGACTACCGGNNRG   | GtCtGtGtGtA-ACtACCGaAGG    | - | 4 | 2 | 9  | 0.00 | 4.50 |
| Chr8:13274657-132746679   | 5 | RNA | GGCCGAGGTCGACTACCGGNNRG   | GGC-AGGcGtGAGaACCGCGCGG    | - | 4 | 2 | 9  | 0.00 | 4.50 |
| Chr5:160726065-160726087  | 3 | RNA | GGCCGAGGTCGACTACCGGNNRG   | ttCG-AaGtTACaACCGCGCCGG    | + | 5 | 2 | 9  | 0.00 | 4.50 |
| Chr2:216933376-216933398  | 3 | RNA | GGCCGAGGTCGACTACCGGNNRG   | GGCCAGAGGtGtGtGtGtGtGtGtG  | + | 5 | 2 | 9  | 0.00 | 4.50 |
| Chr1:3030226-3030248      | 3 | RNA | GGCCGAGGTCGACTACCGGNNRG   | GCaCaAGtTCGACTA-aGtTAG     | - | 5 | 2 | 9  | 0.00 | 4.50 |
| Chr3:162654656-162654678  | 3 | DNA | GGCCGAGG-TCGACTACCGGNNRG  | ttCCGAGGtGtGtGtGtGtGtGtG   | + | 5 | 1 | 9  | 0.00 | 4.50 |
| Chr2:183134698-183134720  | 5 | RNA | GGCCGAGGTC                |                            |   |   |   |    |      |      |

|                            |            |   |     |                         |                            |   |   |   |   |      |      |
|----------------------------|------------|---|-----|-------------------------|----------------------------|---|---|---|---|------|------|
| Chr2:202024331-202024353   | 202024348  | 3 | RNA | GGCCGAGGTGACTACCGGNNRG  | GGC-tcGcgGACTACGtCTGG      | + | 5 | 2 | 9 | 0.00 | 4.50 |
| Chr5:209656316-209656338   | 209656322  | 4 | RNA | GGCCGAGGTGACTACCGGNNRG  | GGCCtGaTtGtCTt-GGCCAG      | - | 5 | 2 | 0 | 8.81 | 4.41 |
| Chr7:730124299-730124321   | 730124304  | 3 | RNA | GGCCGAGGTGACTACCGGNNRG  | aGCCGAGGcg-GACgACtCGtGG    | - | 4 | 1 | 0 | 8.81 | 4.41 |
| Chr10:83133264-83133286    | 831332779  | 5 | RNA | GGCCGAGGTGACTACCGGNNRG  | G-ClAGGTCTGcgACtCGtCCGG    | + | 5 | 2 | 0 | 8.81 | 4.41 |
| Chr5:188279279-188279301   | 188279284  | 3 | DNA | GGCCGAGGTGACTACCGGNNRG  | cgAcCGgtGgCGACaCCgCGCGGG   | - | 5 | 1 | 0 | 8.81 | 4.41 |
| Chr10:113515115-113515137  | 113515120  | 3 | RNA | GGCCGAGGTGACTACCGGNNRG  | GGCtGcGtGCGtGCGtCGGCGG     | - | 5 | 1 | 0 | 8.81 | 4.41 |
| Chr8:107236058-107236080   | 107236063  | 3 | RNA | GGCCGAGGTGACTACCGGNNRG  | GGC-tcGcgGACTACGtCTGG      | - | 4 | 2 | 0 | 8.81 | 4.41 |
| Chr7:92808129-92808151     | 92808147   | 2 | RNA | GGCCGAGGTGACTACCGGNNRG  | GCCaAhtGcCaACTACC-CAGG     | + | 5 | 2 | 0 | 8.81 | 4.41 |
| Chr6:112250306-112250328   | 112250324  | 2 | RNA | GGCCGAGGTGACTACCGGNNRG  | GGCCG-GTgcACaCCGgaGAC      | + | 5 | 2 | 0 | 8.81 | 4.41 |
| Chr5:147641274-147641296   | 147641291  | 3 | X   | GGCCGAGGTGACTACCGGNNRG  | GgaCGAGGTgAGaCagCaGcAGG    | + | 5 | 0 | 0 | 8.81 | 4.41 |
| Chr4:176279491-176279513   | 176279498  | 5 | RNA | GGCCGAGGTGACTACCGGNNRG  | GGCCG-GTgcACaCCGgaGAC      | - | 5 | 2 | 0 | 8.81 | 4.41 |
| Chr8:78639353-78639375     | 78639358   | 3 | RNA | GGCCGAGGTGACTACCGGNNRG  | G-aCGGtGCTCGaACgAgCGGG     | - | 5 | 1 | 0 | 8.81 | 4.41 |
| Chr1:5942859-5942881       | 5942865    | 4 | RNA | GGCCGAGGTGACTACCGGNNRG  | G-CCGAcGgCGtCGTACCGGAGG    | - | 3 | 1 | 0 | 8.81 | 4.41 |
| Chr1:231826861-231826883   | 231826877  | 4 | RNA | GGCCGAGGTGACTACCGGNNRG  | ttCGAaTCTGACTA-tGCTGG      | + | 5 | 2 | 0 | 8.81 | 4.41 |
| Chr1:160764689-160764711   | 160764704  | 5 | RNA | GGCCGAGGTGACTACCGGNNRG  | cCGCtGcGTtCGtCTA-tGCTGG    | + | 5 | 2 | 0 | 8.81 | 4.41 |
| Chr5:85731455-85731477     | 85731471   | 4 | RNA | GGCCGAGGTGACTACCGGNNRG  | G-aCGGtGCTCGaACgAgCGGG     | + | 5 | 1 | 0 | 8.81 | 4.41 |
| Chr1:193924808-193924830   | 193924814  | 4 | RNA | GGCCGAGGTGACTACCGGNNRG  | GGCCG-GGcCAtCaCGtCGCGGG    | - | 5 | 1 | 0 | 8.81 | 4.41 |
| Chr8:134545370-134545392   | 134545377  | 5 | RNA | GGCCGAGGTGACTACCGGNNRG  | GGCCGAGGtGtGtCGt-GCTGGTGG  | - | 4 | 1 | 0 | 8.81 | 4.41 |
| Chr4:109407677-109407699   | 109407684  | 5 | RNA | GGCCGAGGTGACTACCGGNNRG  | GGCCaAtcTCG-TAgCaGCAAG     | - | 5 | 2 | 0 | 8.81 | 4.41 |
| Chr7:54629060-54629082     | 54629076   | 4 | RNA | GGCCGAGGTGACTACCGGNNRG  | GGC-GAGGTtCGcCaACaGgGAG    | + | 4 | 1 | 0 | 8.81 | 4.41 |
| Chr4:101066696-101066718   | 101066713  | 3 | RNA | GGCCGAGGTGACTACCGGNNRG  | GcCGAGGcGCGA-ActGtGGG      | + | 5 | 2 | 0 | 8.81 | 4.41 |
| Chr7:100980934-100980956   | 100980951  | 3 | RNA | GGCCGAGGTGACTACCGGNNRG  | aAtCaAGGTt-ACTACtGgaAGG    | + | 5 | 2 | 0 | 8.81 | 4.41 |
| Chr2:205897453-205897475   | 205897471  | 2 | RNA | GGCCGAGGTGACTACCGGNNRG  | GaCCGAGG-CGCGaCaAaGaaGAG   | + | 5 | 1 | 0 | 8.81 | 4.41 |
| Chr3:83773525-83773547     | 83773532   | 5 | RNA | GGCCGAGGTGACTACCGGNNRG  | tGCGAGGcG-GaGTaCGcCGCAG    | - | 5 | 2 | 0 | 8.81 | 4.41 |
| Chr7:5414793-5414815       | 5414808    | 5 | RNA | GGCCGAGGTGACTACCGGNNRG  | GaC-tGtGtAaCTACCGtCGAGG    | + | 5 | 2 | 0 | 8.81 | 4.41 |
| Chr4:18284845-18284867     | 18284852   | 5 | RNA | GGCCGAGGTGACTACCGGNNRG  | caCGaAGtGtGCTtCGtCGAGG     | - | 5 | 1 | 0 | 8.81 | 4.41 |
| Chr1:26682847-26682869     | 26682864   | 3 | RNA | GGCCGAGGTGACTACCGGNNRG  | GggCGAGGTGtGtGCa-GGCTGG    | + | 4 | 2 | 0 | 8.81 | 4.41 |
| Chr8:165249561-165249583   | 165249568  | 3 | RNA | GGCCGAGGTGACTACCGGNNRG  | GGCCa-CTCGaAGtGtGtGGTGG    | - | 4 | 2 | 0 | 8.81 | 4.41 |
| Chr2:143611350-143611372   | 143611357  | 5 | RNA | GGCCGAGGTGACTACCGGNNRG  | GGCCG-GTgcACaCCGgaGAC      | - | 5 | 2 | 0 | 8.81 | 4.41 |
| Chr1:17167918-17167940     | 17167933   | 5 | DNA | G-GCCGAGGTGACTACCGGNNRG | GGCCGAGGTtCGggaACtCGtCCGG  | + | 5 | 1 | 0 | 8.81 | 4.41 |
| Chr3:141127837-141127859   | 141127842  | 3 | RNA | GGCCGAGGTGACTACCGGNNRG  | GGCCGAGtGcG-TtGcCGAGG      | - | 5 | 2 | 0 | 8.81 | 4.41 |
| Chr1:121275645-121275667   | 121275652  | 5 | RNA | GGCCGAGGTGACTACCGGNNRG  | GG-GAGaCGaAGtCCCGCGAG      | - | 5 | 2 | 7 | 1.65 | 4.33 |
| Chr1:27905964-27905986     | 27905980   | 4 | RNA | GGCCGAGGTGACTACCGGNNRG  | G-aCGGtGTCGCaACgAgCGGG     | + | 5 | 1 | 8 | 0.55 | 4.28 |
| Chr4:67266523-67266545     | 67266541   | 2 | DNA | GGCCGAGGTGACTACCGGNNRG  | cGgCGAGGTACGAActCCGCGGAG   | + | 5 | 1 | 8 | 0.55 | 4.28 |
| Chr9:96868831-96868853     | 96868848   | 3 | RNA | GGCCGAGGTGACTACCGGNNRG  | cCGCtAGGTtCGtGtGc-CGAG     | + | 4 | 2 | 3 | 5.51 | 4.26 |
| Chr2:91712420-91712442     | 91712425   | 3 | DNA | GGCCGAGGTGACTACCGGNNRG  | tCTCaAGCGtGACtAaTCCGAGG    | - | 5 | 2 | 3 | 5.51 | 4.26 |
| Chr3:176910066-176910088   | 176910072  | 4 | RNA | GGCCGAGGTGACTACCGGNNRG  | GGGCGAGTCTGACTAg-GGCTGG    | - | 3 | 1 | 5 | 3.30 | 4.15 |
| Chr10:9608780-9608802      | 9608786    | 4 | X   | GGCCGAGGTGACTACCGGNNRG  | GaCCGAGGggGaAaCTCtGCTGG    | + | 5 | 0 | 5 | 3.30 | 4.15 |
| Chr6:83243418-83243440     | 83243425   | 5 | DNA | GGCCGAGGTGACTACCGGNNRG  | GGGcgAGTtGtGtAaCTACGCTAG   | - | 5 | 2 | 0 | 8.26 | 4.13 |
| Chr8:126721138-126721160   | 126721144  | 4 | DNA | GGCCGAGGTGACTACCGGNNRG  | GGCCGAGTtGtGtGtGAGCaGcAGG  | - | 5 | 1 | 0 | 8.26 | 4.13 |
| Chr8:78342334-78342356     | 78342339   | 3 | RNA | GGCCGAGGTGACTACCGGNNRG  | G-aCGGtGTCGCaCaAaGgCGGG    | - | 5 | 1 | 0 | 8.26 | 4.13 |
| Chr10:23777922-23777944    | 23777928   | 4 | RNA | GGCCGAGGTGACTACCGGNNRG  | GaGcACaGtGG-TCtCaAGtTGG    | - | 5 | 2 | 0 | 8.26 | 4.13 |
| Chr8:84425660-84425682     | 84425675   | 5 | RNA | GGCCGAGGTGACTACCGGNNRG  | G-aGCGgAGaAGaACCGCTGG      | + | 5 | 2 | 0 | 8.26 | 4.13 |
| Chr5:121247559-121247581   | 121247574  | 5 | RNA | GGCCGAGGTGACTACCGGNNRG  | tGACGAGGtGtG-TAgCGGcAGG    | + | 5 | 2 | 0 | 8.26 | 4.13 |
| Chr10:56056617-56056639    | 56056634   | 3 | RNA | GGCCGAGGTGACTACCGGNNRG  | GaGcCGgtCTCGaCa-CGtGCGAG   | + | 5 | 2 | 0 | 8.26 | 4.13 |
| Chr10:92362659-92362681    | 92362664   | 3 | RNA | GGCCGAGGTGACTACCGGNNRG  | GCGCGAGGtGtGtGtGtGtGtG     | - | 3 | 3 | 2 | 8.26 | 4.13 |
| Chr7:160511260-160511282   | 160511277  | 3 | RNA | GGCCGAGGTGACTACCGGNNRG  | GaCCGAGGgAGtGATAc-CAGG     | - | 5 | 2 | 0 | 8.26 | 4.13 |
| Chr1:126987078-126987100   | 126987096  | 2 | RNA | GGCCGAGGTGACTACCGGNNRG  | GGC-aAGGcCTACcACCGgGGG     | + | 5 | 2 | 0 | 8.26 | 4.13 |
| Chr2:3657200-3657222       | 3657216    | 4 | RNA | GGCCGAGGTGACTACCGGNNRG  | G-CCGAGGcCaACTGgGgCGGG     | + | 5 | 1 | 0 | 8.26 | 4.13 |
| Chr4:81670489-81670511     | 81670507   | 2 | RNA | GGCCGAGGTGACTACCGGNNRG  | GGCaAGGTtGAGtACaAGgGAG     | + | 5 | 1 | 0 | 8.26 | 4.13 |
| Chr7:83863920-83863924     | 83863924   | 2 | RNA | GGCCGAGGTGACTACCGGNNRG  | GcCC-GTGCAGtCCGCGAGG       | - | 5 | 2 | 0 | 8.26 | 4.13 |
| Chr1:8847411-8847433       | 8847417    | 4 | RNA | GGCCGAGGTGACTACCGGNNRG  | GgaCGAGGCaGAtgAC-GaCGG     | - | 5 | 2 | 0 | 8.26 | 4.13 |
| Chr1:168799184-168799206   | 168799201  | 3 | DNA | GGC-CGAGGTGACTACCGGNNRG | GCTCGAGGaGtGtCTtCCGCTGG    | + | 4 | 1 | 0 | 8.26 | 4.13 |
| Chr3:28133551-28133573     | 28133567   | 4 | RNA | GGCCGAGGTGACTACCGGNNRG  | GGaCGGgGtGCa-gACCGCGCGG    | + | 4 | 2 | 0 | 8.26 | 4.13 |
| Chr10:85106046-85106068    | 85106053   | 5 | RNA | GGCCGAGGTGACTACCGGNNRG  | GGC-AAGtCaAaCTCCGCGCGG     | - | 4 | 2 | 0 | 8.26 | 4.13 |
| Chr1:93460470-93460492     | 93460477   | 5 | RNA | GGCCGAGGTGACTACCGGNNRG  | GtGtGCa-CGAAaGtGtGtGAG     | - | 4 | 2 | 0 | 8.26 | 4.13 |
| Chr10:87882373-87882395    | 87882347   | 5 | RNA | GGCCGAGGTGACTACCGGNNRG  | GtGCaAcG-GACTACCGtGGTGG    | + | 4 | 2 | 0 | 8.26 | 4.13 |
| Chr4:228199996-228200018   | 228200011  | 5 | RNA | GGCCGAGGTGACTACCGGNNRG  | GtGCGAGaTtGtCTtCC-CtGG     | + | 5 | 2 | 0 | 8.26 | 4.13 |
| Chr5:148957471-148957493   | 148957477  | 4 | RNA | GGCCGAGGTGACTACCGGNNRG  | GtGtGAGGcGtGtCTGCC-CCGG    | - | 5 | 2 | 0 | 8.26 | 4.13 |
| Chr6:96825790-96825812     | 96825797   | 5 | DNA | GGC-CGAGGTGACTACCGGNNRG | GCTtCGtGtGtGtGtCTtCCGCTGG  | + | 5 | 1 | 0 | 8.26 | 4.13 |
| Chr9:25819071-25819093     | 25819086   | 5 | RNA | GGCCGAGGTGACTACCGGNNRG  | GGC-ttGcgGACTACtGGCTGG     | + | 5 | 2 | 0 | 8.26 | 4.13 |
| Chr1:28667288-28667310     | 28667304   | 4 | RNA | GGCCGAGGTGACTACCGGNNRG  | cCGCCAGG-cAACTAgTgcCCAAG   | + | 5 | 1 | 0 | 8.26 | 4.13 |
| Chr5:190521127-190521149   | 190521134  | 5 | RNA | GGCCGAGGTGACTACCGGNNRG  | GcGtGAGtccGAC-CGtCGtAAG    | - | 5 | 2 | 0 | 8.26 | 4.13 |
| Chr5:86294324-86294346     | 86294339   | 5 | RNA | GGCCGAGGTGACTACCGGNNRG  | tGtCt-cTtGACTACCGGtCTGG    | + | 5 | 1 | 0 | 8.26 | 4.13 |
| Chr6:130743476-130743498   | 130743494  | 2 | RNA | GGCCGAGGTGACTACCGGNNRG  | G-CCGtGtCTCGACtCGtGtGAGG   | + | 5 | 1 | 0 | 8.26 | 4.13 |
| Chr4:128461665-128461687   | 128461670  | 3 | RNA | GGCCGAGGTGACTACCGGNNRG  | GaCaAGGAGgg-CaAGtGtGtGAG   | - | 5 | 2 | 0 | 8.26 | 4.13 |
| Chr5:129459716-129459738   | 129459732  | 4 | RNA | GGCCGAGGTGACTACCGGNNRG  | G-aCGGtGTCGACaACgAgCGGG    | - | 5 | 1 | 0 | 8.26 | 4.13 |
| Chr1:1274397528-1274397550 | 1274397532 | 2 | RNA | GGCCGAGGTGACTACCGGNNRG  | GGCC-AGGcGcGcgCGtCCGCGGG   | - | 4 | 1 | 0 | 8.26 | 4.13 |
| Chr10:37323842-37323864    | 37323857   | 5 | RNA | GGCCGAGGTGACTACCGGNNRG  | GtGCGtGcGtGcG-cAACCGtCTGG  | + | 5 | 2 | 0 | 8.26 | 4.13 |
| Chr9:12599199-12599221     | 12599206   | 5 | RNA | GGCCGAGGTGACTACCGGNNRG  | GGCCCGcGtT-GAGtCaAGtGAG    | - | 5 | 1 | 0 | 8.26 | 4.13 |
| Chr7:80448651-80448673     | 80448669   | 2 | DNA | GGC-CGAGGTGACTACCGGNNRG | GaCAACgGtGCTCGACgAGaCGGG   | - | 5 | 2 | 0 | 8.26 | 4.13 |
| Chr8:95012880-95012902     | 95012886   | 4 | RNA | GGCCGAGGTGACTACCGGNNRG  | GtCTtCGG-GAtaAACCGGcAGG    | - | 5 | 2 | 0 | 8.26 | 4.13 |
| Chr8:142802791-142802813   | 142802796  | 3 | RNA | GGCCGAGGTGACTACCGGNNRG  | G-aGAGGTtCaACaAGaCGGG      | - | 5 | 1 | 0 | 8.26 | 4.13 |
| Chr3:28930689-28930711     | 28930707   | 2 | RNA | GGCCGAGGTGACTACCGGNNRG  | GGCCG-GTgcACaCCGgaTAG      | + | 5 | 2 | 0 | 8.26 | 4.13 |
| Chr3:89804446-89804468     | 89804452   | 4 | RNA | GGCCGAGGTGACTACCGGNNRG  | GGC-ttGtGACTACCGtGCTGG     | - | 3 | 2 | 0 | 8.26 | 4.13 |
| Chr2:60165521-60165543     | 60165538   | 3 | RNA | GGCCGAGGTGACTACCGGNNRG  | GaCaAGGtGtGtGtGtGtGtGtG    | + | 5 | 2 | 0 | 8.26 | 4.13 |
| Chr4:237728625-237728647   | 237728643  | 2 | RNA | GGCCGAGGTGACTACCGGNNRG  | GtCGCGAGGtGtGt-TgCTGAGAG   | + | 5 | 2 | 0 | 8.26 | 4.13 |
| Chr6:162934695-162934717   | 162934701  | 4 | DNA | GGC-CGAGGTGACTACCGGNNRG | GtCTCGAGGtGtGtCTtCCGCTGG   | - | 5 | 1 | 0 | 8.26 | 4.13 |
| Chr1:223867058-223867080   | 223867073  | 5 | DNA | GGC-CGAGGTGACTACCGGNNRG | GGCCTtGgGtGtGtCaACcCGGCGGG | + | 5 | 2 | 0 | 8.26 | 4.13 |
| Chr9:147054948-147054970   | 147054964  | 4 | RNA | GGCCGAGGTGACTACCGGNNRG  | G-aCGGtGTCGAGCaAaGgCGGG    | + | 5 | 1 | 0 | 8.26 | 4.13 |
| Chr7:111060700-111060722   | 111060717  | 3 | RNA | GGCCGAGGTGACTACCGGNNRG  | GGCCG-GTgcACaCCGgaACG      | + | 5 | 2 | 0 | 8.26 | 4.13 |
| Chr6:163883708-163883730   | 163883726  | 2 | RNA | GGCCGAGGTGACTACCGGNNRG  | GaCaAGGtGcG-G-aCCCGaAGC    | + | 5 | 2 | 0 | 8.26 | 4.13 |
| Chr8:104410705-104410727   | 104410711  | 4 | RNA | GGCCGAGGTGACTACCGGNNRG  | GcGtGAGtccGAC-CGtGtCAAG    | - | 5 | 2 | 0 | 8.26 | 4.13 |
| Chr5:205212791-205212813   | 205212807  | 3 | RNA | GGCCGAGGTGACTACCGGNNRG  | G-CCGaAGtAaACaACtCGtCTGG   | + | 5 | 1 | 0 | 8.26 | 4.13 |
| Chr10:15875069-15875091    | 15875074   | 3 | RNA | GGCCGAGGTGACTACCGGNNRG  | GaCaAGGtGtGAGtGtCaAGCAGG   | + | 5 | 1 | 0 | 8.26 | 4.13 |
| Chr7:43839142-43839164     | 43839147   | 3 | DNA | GGCCGAGGTGACTACCGGNNRG  | GGCCGAGGTGACTACCGGNNRG     | - | 5 | 2 | 0 | 8.16 | 4.08 |
| Chr6:138881896-138882008   | 138881893  | 5 | DNA | GGCCGAGGTGACTACCGGNNRG  | GgCGAGGtGtGtCTTAgGCGCGGG   | - | 5 | 1 | 8 | 0.00 | 4.00 |
| Chr1:137743674-137743696   | 137743691  | 3 | RNA | GGCCGAGGTGACTACCGGNNRG  | GGCCGAGG-GgagTtCGGtCGGG    | + | 4 | 2 | 8 | 0.00 | 4.00 |
| Chr5:54424582-54424604     | 54424589   | 5 | RNA | GGCCGAGGTGACTACCGGNNRG  | cCGCCAGaA-ACaACgGCGCGG     | - | 5 | 2 | 8 | 0.00 | 4.00 |
| Chr7:25947108-25947130     | 25947115   | 5 | RNA | GGCCGAGGTGACTACCGGNNRG  | GGCCAGGtGtGtCTtGgGCTAG     | - | 5 | 1 | 8 | 0.00 | 4.00 |
| Chr2:205493225-205493247   | 205493242  | 3 | RNA | GGCCGAGGTGACTACCGGNNRG  | GtCttgGGT-GaCACCgCGCAG     | + | 5 | 1 | 8 | 0.00 | 4.00 |
| Chr6:135951500-135951522   | 135951517  | 3 | RNA | GGCCGAGGTGACTACCGGNNRG  | GGaCaAGG-GAGTAggAGaAGG     | + | 5 | 2 | 8 | 0.00 | 4.00 |
| Chr10:5225                 |            |   |     |                         |                            |   |   |   |   |      |      |

|                           |           |   |     |                           |                            |   |   |   |   |      |      |
|---------------------------|-----------|---|-----|---------------------------|----------------------------|---|---|---|---|------|------|
| Chr8:18781622-18781644    | 18781629  | 5 | RNA | GGCCAGAGTCTGACTACCGGNNRG  | GGCCaAGcgCG-gACCGTCGG      | - | 5 | 2 | 8 | 0.00 | 4.00 |
| Chr10:110702323-110702345 | 110702340 | 3 | DNA | GCG-CGAGGTCTGACTACCGGNNRG | GcCTCGAGGcGcACaCccGGCGGG   | + | 5 | 1 | 8 | 0.00 | 4.00 |
| Chr5:161945647-161945669  | 161945654 | 5 | DNA | GGCCAGAGT-CGACTACCGGNNRG  | GGCCGAGGTGcCtCtTCaCGAG     | - | 5 | 1 | 8 | 0.00 | 4.00 |
| Chr1:194552141-194552163  | 194552160 | 3 | RNA | GGCCAGAGTCTGACTACCGGNNRG  | GG-GAGGagGtATAgGGcCAG      | + | 5 | 2 | 8 | 0.00 | 4.00 |
| Chr5:4113674-4113696      | 4113681   | 5 | RNA | GGCCAGAGTCTGACTACCGGNNRG  | GGCCGAGatgtAtAcG-CAcAG     | - | 5 | 2 | 8 | 0.00 | 4.00 |
| Chr8:41479679-41479701    | 41479686  | 5 | RNA | GGCCAGAGTCTGACTACCGGNNRG  | GGCCGAGatGTCT-CAcGGcGAG    | - | 4 | 1 | 8 | 0.00 | 4.00 |
| Chr10:91548575-91548597   | 91548592  | 3 | RNA | GGCCAGAGTCTGACTACCGGNNRG  | GGCg-tcGgGACTACCGGCTGG     | + | 4 | 2 | 8 | 0.00 | 4.00 |
| Chr5:11905700-11905722    | 11905707  | 5 | DNA | GGCCAGAGTCTGACTACCGGNNRG  | cGcCGGatGACTCACCGGaCAG     | - | 5 | 1 | 8 | 0.00 | 4.00 |
| Chr6:3324436-3324458      | 3324443   | 5 | DNA | GGCCAGAGTCTGACTACCGGNNRG  | GGCCGAGGTCTGAGCTcgaGGCTGG  | - | 3 | 1 | 8 | 0.00 | 4.00 |
| Chr5:102936921-102936943  | 102936938 | 3 | RNA | GGCCAGAGTCTGACTACCGGNNRG  | GGCCGgGcTgaACT-CCGaCTAG    | + | 5 | 1 | 8 | 0.00 | 4.00 |
| Chr10:59019062-59019084   | 59019067  | 3 | DNA | GCG-CCAGGTCTGACTACCGGNNRG | GaCAACgGgGTTCGACgAgaGGCGGG | - | 5 | 2 | 0 | 7.71 | 3.86 |
| Chr5:22797751-22797773    | 22797758  | 5 | DNA | GGCCAGAGTCTGACTACCGGNNRG  | GGAAGGTHtCTCTCCGGcCAG      | - | 5 | 1 | 0 | 7.71 | 3.86 |
| Chr2:209209610-209209632  | 209209628 | 2 | RNA | GGCCAGAGTCTGACTACCGGNNRG  | aGCGgGgG-GAaTcCTCGCGGG     | + | 5 | 2 | 0 | 7.71 | 3.86 |
| Chr2:42120543-42120565    | 42120561  | 2 | RNA | GGCCAGAGTCTGACTACCGGNNRG  | GGAaCcAGtGG-TtCGGGCAG      | + | 5 | 2 | 0 | 7.71 | 3.86 |
| Chr10:150122156-150122178 | 150122160 | 2 | RNA | GGCCAGAGTCTGACTACCGGNNRG  | aGCGAGGTCTGACTTgGgGgGg     | - | 4 | 1 | 0 | 7.71 | 3.86 |
| Chr10:63152603-63152625   | 63152609  | 4 | RNA | GGCCAGAGTCTGACTACCGGNNRG  | GGC-AuGgGACTACCGGCTGG      | - | 4 | 2 | 0 | 7.71 | 3.86 |
| Chr3:188615147-188615169  | 188615151 | 2 | RNA | GGCCAGAGTCTGACTACCGGNNRG  | aGCGCaGtTgG-CAcCGCGcAG     | - | 5 | 1 | 0 | 7.71 | 3.86 |
| Chr5:11129257-11129279    | 11129262  | 3 | DNA | GCG-CCAGGTCTGACTACCGGNNRG | GGCCTTGgGgGcACaCccGGCGGG   | - | 5 | 2 | 0 | 7.71 | 3.86 |
| Chr3:147343929-147343951  | 147343946 | 3 | RNA | GGCCAGAGTCTGACTACCGGNNRG  | cGaCGgGTTCGAGCa-AGaAG      | + | 5 | 2 | 0 | 7.71 | 3.86 |
| Chr5:205698867-205698889  | 205698872 | 3 | RNA | GGCCAGAGTCTGACTACCGGNNRG  | GaCaG-GGTCTGAGCaGgaGGGG    | - | 5 | 1 | 0 | 7.71 | 3.86 |
| Chr4:171574757-171574779  | 171574762 | 3 | RNA | GGCCAGAGTCTGACTACCGGNNRG  | G-aCGGgTTCGACaCaGgaGGGG    | - | 5 | 1 | 0 | 7.71 | 3.86 |
| Chr10:97282160-97282182   | 97282178  | 2 | RNA | GGCCAGAGTCTGACTACCGGNNRG  | GG-GAGGTCTGgTtGgGgaAGG     | + | 5 | 2 | 0 | 7.71 | 3.86 |
| Chr7:10258808-10258830    | 10258823  | 5 | RNA | GGCCAGAGTCTGACTACCGGNNRG  | tGcGAGGTgGtATtACG-aaG      | + | 5 | 2 | 0 | 7.71 | 3.86 |
| Chr10:129800836-129800858 | 129800841 | 3 | RNA | GGCCAGAGTCTGACTACCGGNNRG  | GGC-tcGgGACTACCGGCTGG      | - | 4 | 2 | 0 | 7.71 | 3.86 |
| Chr10:147635855-147635877 | 147635870 | 5 | RNA | GGCCAGAGTCTGACTACCGGNNRG  | GGC-tcGgGACTACCGCTGG       | + | 5 | 2 | 0 | 7.71 | 3.86 |
| Chr1:10083773-10083795    | 10083777  | 2 | RNA | GGCCAGAGTCTGACTACCGGNNRG  | GGCCGAGGTCTG-ATAgNSG       | - | 5 | 2 | 0 | 7.71 | 3.86 |
| Chr10:139168803-139168825 | 139168807 | 2 | DNA | GGCCAGAGTCTGACTACCG-NNRG  | GGCCGAGGTCTGggtTgaCCCTCG   | - | 5 | 2 | 0 | 7.71 | 3.86 |
| Chr2:66966821-66966843    | 66966825  | 2 | RNA | GGCCAGAGTCTGACTACCGGNNRG  | GGC-AGCTGAGgATgaGCTGG      | - | 5 | 2 | 0 | 7.71 | 3.86 |
| Chr3:212883751-212883773  | 212883766 | 5 | RNA | GGCCAGAGTCTGACTACCGGNNRG  | GGcCAcG-GACTACCGGCTGG      | + | 3 | 2 | 0 | 7.71 | 3.86 |
| Chr5:93592105-93592127    | 93592110  | 3 | RNA | GGCCAGAGTCTGACTACCGGNNRG  | GGCctGcGg-CTgCCcCGGG       | - | 5 | 2 | 0 | 7.71 | 3.86 |
| Chr5:148721181-148721203  | 148721186 | 3 | RNA | GGCCAGAGTCTGACTACCGGNNRG  | GGCCGtGgTaGA-AAaCtGCGG     | - | 5 | 2 | 0 | 7.71 | 3.86 |
| Chr2:35713287-35713309    | 35713302  | 5 | RNA | GGCCAGAGTCTGACTACCGGNNRG  | GtGtGgGa-ACCTACCGGaAGG     | + | 5 | 2 | 0 | 7.71 | 3.86 |
| Chr5:123207231-123207253  | 123207235 | 2 | RNA | GGCCAGAGTCTGACTACCGGNNRG  | GtCtaGGTCAa-ACCgaCGGG      | - | 5 | 2 | 0 | 7.71 | 3.86 |
| Chr2:78413225-78413247    | 78413231  | 4 | DNA | GCG-CCAGGTCTGACTACCGGNNRG | GGCCTTGgGgGcACaCccGGCGGG   | - | 5 | 2 | 0 | 7.71 | 3.86 |
| Chr3:39499815-39499837    | 39499820  | 3 | RNA | GGCCAGAGTCTGACTACCGGNNRG  | GtCaGtGtG-ACTTcGtGCGAG     | - | 5 | 2 | 0 | 7.71 | 3.86 |
| Chr1:11522793-11522814    | 11522810  | 3 | DNA | GCG-CCAGGTCTGACTACCGGNNRG | GCTCTGgGtGtCTCTGcCTGG      | + | 5 | 1 | 0 | 7.71 | 3.86 |
| Chr10:128767734-128767756 | 128767741 | 3 | RNA | GGCCAGAGTCTGACTACCGGNNRG  | GtGtCG-GGcCAaCtCtCGGCGGG   | - | 5 | 1 | 0 | 7.71 | 3.86 |
| Chr2:182828126-182828148  | 182828131 | 3 | RNA | GGCCAGAGTCTGACTACCGGNNRG  | GtCCG-GTgcACCTCGGaCAG      | - | 5 | 2 | 0 | 7.71 | 3.86 |
| Chr2:126913098-126913120  | 126913103 | 3 | RNA | GGCCAGAGTCTGACTACCGGNNRG  | eGCGGAaG-CTAcACCGGaTGG     | - | 5 | 1 | 0 | 7.71 | 3.86 |
| Chr3:209871649-209871671  | 209871655 | 4 | DNA | GGCCAGAGTCTGACTACCGGNNRG  | GtGcGgGTGcGgCGaAGCaGGCCAG  | - | 5 | 2 | 0 | 7.71 | 3.86 |
| Chr3:57466224-57466246    | 57466241  | 3 | RNA | GGCCAGAGTCTGACTACCGGNNRG  | GACCaAGTCAACTACt-CAAG      | + | 5 | 2 | 0 | 7.71 | 3.86 |
| Chr1:102297391-102297413  | 102297397 | 4 | RNA | GGCCAGAGTCTGACTACCGGNNRG  | GaCGAGGaGtTtTACC-aTGG      | - | 5 | 2 | 0 | 7.71 | 3.86 |
| Chr1:129682246-129682268  | 129682251 | 3 | RNA | GGCCAGAGTCTGACTACCGGNNRG  | GGCCGgGgGtACT-cGtGCGGG     | + | 5 | 1 | 0 | 7.71 | 3.86 |
| Chr7:52124860-52124882    | 52124878  | 2 | RNA | GGCCAGAGTCTGACTACCGGNNRG  | GtGcGgGtGtGg-TgCTGGCGGG    | + | 5 | 2 | 0 | 7.71 | 3.86 |
| Chr10:53136815-53136837   | 53136822  | 5 | RNA | GGCCAGAGTCTGACTACCGGNNRG  | caCAAGTCTGcCT-CCGCTAG      | - | 5 | 1 | 0 | 7.71 | 3.86 |
| Chr3:83227638-83227660    | 83227644  | 4 | RNA | GGCCAGAGTCTGACTACCGGNNRG  | GGCCGAATCGG-aTtGtGCaAG     | - | 5 | 2 | 0 | 7.71 | 3.86 |
| Chr2:145347124-145347146  | 145347139 | 4 | RNA | GGCCAGAGTCTGACTACCGGNNRG  | GtGcAGtCTCCaCaA-CCGGG      | + | 5 | 2 | 0 | 7.71 | 3.86 |
| Chr7:167250194-167250216  | 167250199 | 3 | RNA | GGCCAGAGTCTGACTACCGGNNRG  | GGcGAGGG-GACagTtGtCGGG     | - | 5 | 2 | 0 | 7.71 | 3.86 |
| Chr5:201556778-201556800  | 201556785 | 5 | RNA | GGCCAGAGTCTGACTACCGGNNRG  | GtGCaAGGtGCaGtGtC-CCGG     | - | 5 | 2 | 0 | 7.71 | 3.86 |
| Chr6:159401411-159401433  | 159401416 | 3 | RNA | GGCCAGAGTCTGACTACCGGNNRG  | G-aCGGgTTCGAGCaGgaGGGG     | - | 5 | 1 | 0 | 7.71 | 3.86 |
| Chr10:41545147-41545169   | 41545152  | 3 | DNA | GGCCAGAGTCTGACTACCGGNNRG  | GcCTCGAGCaCaACCGTGGCCAG    | - | 5 | 2 | 0 | 7.71 | 3.86 |
| Chr8:21977857-21977879    | 21977875  | 2 | DNA | GGCCAGAGG-TCGACTACCGGNNRG | GaCtCGGGTTGAAHtCCGGTGG     | + | 5 | 1 | 0 | 7.71 | 3.86 |
| Chr7:41944476-41944498    | 41944481  | 3 | RNA | GGCCAGAGTCTGACTACCGGNNRG  | GtaCG-GTtGAtACtGGCGGG      | - | 5 | 2 | 0 | 7.71 | 3.86 |
| Chr4:79739608-79739630    | 79739623  | 5 | RNA | GGCCAGAGTCTGACTACCGGNNRG  | GtGcCGGgGtTtGtCT-CCGgAG    | + | 5 | 2 | 0 | 7.71 | 3.86 |
| Chr7:20017349-20017371    | 20017365  | 4 | RNA | GGCCAGAGTCTGACTACCGGNNRG  | GtCaGtACTCTGACaAC-CCAGG    | - | 5 | 2 | 0 | 7.71 | 3.86 |
| Chr5:13228441-13228443    | 13228440  | 3 | DNA | GGCCAGAGTCTGACTACCGGNNRG  | GtCaGAGTCTGgTtA-GCTCTAG    | - | 5 | 2 | 0 | 7.71 | 3.86 |
| Chr6:83985168-83985190    | 83985172  | 2 | RNA | GGCCAGAGTCTGACTACCGGNNRG  | GaCGAAGG-GtCGcCGGaAG       | - | 5 | 2 | 0 | 7.71 | 3.86 |
| Chr6:86858920-86858942    | 86858937  | 3 | DNA | GCG-CCAGGTCTGACTACCGGNNRG | GGCTCGAAHtTtACaCccGGGCTGG  | + | 4 | 1 | 0 | 7.71 | 3.86 |
| Chr10:28362556-28362578   | 28362562  | 4 | RNA | GGCCAGAGTCTGACTACCGGNNRG  | aGCTcGgGcGACTACt-CTAG      | - | 5 | 2 | 0 | 7.71 | 3.86 |
| Chr2:39860358-39860380    | 39860363  | 3 | RNA | GGCCAGAGTCTGACTACCGGNNRG  | GtGtCAcGgC-CTtCCtCGGGG     | - | 5 | 2 | 0 | 7.71 | 3.86 |
| Chr4:244201160-244201182  | 244201165 | 3 | RNA | GGCCAGAGTCTGACTACCGGNNRG  | G-aCGGgTTCGACaCaGgaGGGG    | - | 5 | 1 | 0 | 7.71 | 3.86 |
| Chr1:259160861-259160883  | 259160868 | 5 | RNA | GGCCAGAGTCTGACTACCGGNNRG  | GGC-tGcGACTACCGGCTGG       | - | 5 | 2 | 0 | 7.71 | 3.86 |
| Chr9:156236554-156236576  | 156236570 | 4 | RNA | GGCCAGAGTCTGACTACCGGNNRG  | aGCGGAAGgGtG-CCaCaAGGCTGG  | + | 5 | 1 | 0 | 7.71 | 3.86 |
| Chr10:132199051-132199073 | 132199058 | 3 | RNA | GGCCAGAGTCTGACTACCGGNNRG  | G-CCAGAGTCTGcGgGcCGgAAG    | - | 5 | 2 | 0 | 7.71 | 3.86 |
| Chr6:146032127-146032149  | 146032132 | 5 | RNA | GGCCAGAGTCTGACTACCGGNNRG  | G-aCGGgTTCGAGCaGgaGGGG     | - | 5 | 1 | 0 | 7.71 | 3.86 |
| Chr3:117401968-117401990  | 117401986 | 2 | DNA | GCG-CCAGGTCTGACTACCGGNNRG | GCG-CCAGGTCTGACTACCGGNNRG  | - | 5 | 2 | 0 | 7.71 | 3.86 |
| Chr3:119038444-119038466  | 119038448 | 2 | DNA | GGCCAGAGTCTGACTACCG-NNRG  | cGcCGgGtCTCACTACCGGcCGGG   | - | 5 | 2 | 0 | 7.71 | 3.86 |
| Chr4:21100458-21100480    | 21100462  | 2 | RNA | GGCCAGAGTCTGACTACCGGNNRG  | GGCCcAGGTtGtACAAHtGCGGG    | - | 5 | 1 | 0 | 7.71 | 3.86 |
| Chr6:165163533-165163555  | 165163551 | 5 | RNA | G-GCCAGAGTCTGACTACCGGNNRG | GGCCcGtGgGcGAGTACtGCGGAG   | + | 5 | 1 | 0 | 7.71 | 3.86 |
| Chr9:133600039-133600061  | 133600054 | 5 | RNA | GGCCAGAGTCTGACTACCGGNNRG  | GGC-tHtGcGACTACCGGCTGG     | + | 4 | 2 | 6 | 1.65 | 3.83 |
| Chr3:216843243-216843265  | 216843261 | 2 | RNA | GGCCAGAGTCTGACTACCGGNNRG  | GGC-gGtTaGcAGCaGaCAG       | + | 5 | 2 | 1 | 6.61 | 3.81 |
| Chr4:142295394-142295416  | 142295400 | 4 | RNA | GGCCAGAGTCTGACTACCGGNNRG  | GGC-AGGcCGAGcACTCGGCGGG    | - | 3 | 2 | 7 | 0.55 | 3.78 |
| Chr6:71670360-71670382    | 71670365  | 3 | RNA | GGCCAGAGTCTGACTACCGGNNRG  | G-CCGgAGTCTGACTCTCGGtGAG   | - | 4 | 1 | 7 | 0.55 | 3.78 |
| Chr10:123030488-123030510 | 123030494 | 4 | RNA | GGCCAGAGTCTGACTACCGGNNRG  | tG-GAGTtHtGCaACCGGaTGG     | - | 5 | 2 | 0 | 5.51 | 3.76 |
| Chr2:129356996-129360018  | 129360011 | 5 | RNA | GGCCAGAGTCTGACTACCGGNNRG  | GtGgG-AGGcTcGAGaACCGGCTGG  | + | 4 | 1 | 0 | 7.16 | 3.58 |
| Chr7:22380373-22380394    | 22380389  | 4 | RNA | GGCCAGAGTCTGACTACCGGNNRG  | G-aCGGgTTCGAGCaGgaGGGG     | + | 5 | 2 | 0 | 7.16 | 3.58 |
| Chr9:91636078-91636100    | 91636094  | 4 | RNA | GGCCAGAGTCTGACTACCGGNNRG  | G-aCGGgTTCGAGCaGgaGGGG     | + | 5 | 1 | 0 | 7.16 | 3.58 |
| Chr2:8288552-8288574      | 8288570   | 2 | RNA | GGCCAGAGTCTGACTACCGGNNRG  | GaCCGAGG-CCAGCaCaGaAGG     | + | 5 | 1 | 0 | 7.16 | 3.58 |
| Chr6:349520-349542        | 349527    | 5 | RNA | GGCCAGAGTCTGACTACCGGNNRG  | GCcGAGGgGcCaACACC-gTGG     | - | 5 | 2 | 0 | 7.16 | 3.58 |
| Chr7:70339169-70339191    | 70339174  | 3 | RNA | GGCCAGAGTCTGACTACCGGNNRG  | G-aCGGgTTCGAGCaGgaGGGG     | - | 5 | 1 | 0 | 7.16 | 3.58 |
| Chr6:144446673-144446695  | 144446690 | 3 | RNA | GGCCAGAGTCTGACTACCGGNNRG  | aGt-tGtTgGAtAACCGGCAAG     | + | 5 | 2 | 0 | 7.16 | 3.58 |
| Chr7:133222422-133222444  | 133222428 | 4 | RNA | GGCCAGAGTCTGACTACCGGNNRG  | GtGcCG-GGcCAaCtCtCGGCGGG   | - | 4 | 1 | 0 | 7.16 | 3.58 |
| Chr2:216374341-216374363  | 216374347 | 4 | RNA | GGCCAGAGTCTGACTACCGGNNRG  | GtGcCGAGGTCTGAC-AttCtCAG   | - | 5 | 1 | 0 | 7.16 | 3.58 |
| Chr3:163017842-163017864  | 163017858 | 4 | RNA | GGCCAGAGTCTGACTACCGGNNRG  | G-aCGGgTTCGAGCaGgaGGGG     | + | 5 | 1 | 0 | 7.16 | 3.58 |
| Chr4:28897450-28897472    | 28897455  | 3 | RNA | GGCCAGAGTCTGACTACCGGNNRG  | tHCCGAGGCTG-TAigGcGGG      | - | 5 | 2 | 0 | 7.16 | 3.58 |
| Chr7:1205166-12051688     | 12051684  | 2 | RNA | GGCCAGAGTCTGACTACCGGNNRG  | GGCCAGAGTCTGACTACCGGNNRG   | - | 5 | 2 | 0 | 7.16 | 3.58 |
| Chr4:70715583-70715605    | 70715601  | 2 | RNA | GGCCAGAGTCTGACTACCGGNNRG  | GtGcGAGGTCTGtTgGcG-CCAG    | + | 5 | 2 | 0 | 7.16 | 3.58 |
| Chr10:9074274-9074296     | 9074290   | 2 | RNA | GGCCAGAGTCTGACTACCGGNNRG  | GaCaG-GGTCTGAGCaCaGgaGGG   | + | 5 | 1 | 0 | 7.16 | 3.58 |
| Chr1:87264724-87264746    | 87264741  | 3 | RNA | GGCCAGAGTCTGACTACCGGNNRG  | GaCCGAGGagGgCT-CTGCGGAG    | + | 5 | 1 | 0 | 7.16 | 3.58 |
| Chr7:149461770-149461792  | 149461775 | 3 | RNA | GGCCAGAGTCTGACTACCGGNNRG  | cGCGCa-TCGAHtCCGCGAGG      | - | 3 | 2 | 0 | 7.16 | 3.58 |
| Chr10:67516012-67516034   | 67516018  | 4 | RNA | GGCCAGAGTCTGACTACCGGNNRG  | GtCCG-GTgcACCTCGGaCAG      | - | 5 | 2 | 0 | 7.16 | 3.58 |
| Chr5:172175136-172175158  | 172175141 | 3 | RNA | GGCCAGAGTCTGACTACCGGNNRG  | GGC-tGtGcGACTACCGGaCTGG    | - | 5 | 2 | 0 |      |      |

|                           |           |   |     |                           |                             |   |   |   |   |      |      |
|---------------------------|-----------|---|-----|---------------------------|-----------------------------|---|---|---|---|------|------|
| Chr7:22832794-22832816    | 22832799  | 3 | RNA | GGCCGAGGTCGACTACCGGNNRG   | GGCTAcG--GACTACCGGTGG       | - | 4 | 2 | 0 | 7.16 | 3.58 |
| Chr10:148732123-148732145 | 148732138 | 5 | RNA | GGCCGAGGTCGACTACCGGNNRG   | GGCCGAGGT--AaaAGGgaTGG      | + | 5 | 2 | 0 | 7.16 | 3.58 |
| Chr7:5877055-5877527      | 5877510   | 3 | DNA | GGCGGAGGTGCTACTACCGGNNRG  | GGCGGAGGTGCTGCaGaaCGGCGAG   | + | 5 | 1 | 0 | 7.16 | 3.58 |
| Chr2:17707135-17707157    | 17707141  | 4 | RNA | GGCCGAGGTCGACTACCGGNNRG   | caCAAGTTCGGCT--CCGGCAGG     | - | 5 | 1 | 0 | 7.16 | 3.58 |
| Chr2:55203621-55203643    | 55203628  | 5 | RNA | GGCCGAGGTCGACTACCGGNNRG   | GgaTcAGGagagGACT--CGaCGAG   | + | 5 | 2 | 0 | 7.16 | 3.58 |
| Chr7:29338454-29338476    | 29338470  | 4 | RNA | GGCCGAGGTCGACTACCGGNNRG   | G-aCGGGGTCGACaGaaGgCGGG     | + | 5 | 1 | 0 | 7.16 | 3.58 |
| Chr5:203929589-203929611  | 203929607 | 4 | RNA | GGCCGAGGTCGACTACCGGNNRG   | cCGCGtGcCG--TACCGCCGG       | + | 4 | 2 | 0 | 7.16 | 3.58 |
| Chr4:220932677-220932699  | 220932695 | 2 | DNA | GGCCGAGGTCGACTACCGGNNRG   | GdGcMAGGaaGcGtCTACCGGCTGG   | + | 5 | 1 | 0 | 7.16 | 3.58 |
| Chr6:96275518-96275540    | 96275534  | 4 | RNA | GGCCGAGGTCGACTACCGGNNRG   | GGC-AAGCGCGAggACtCGCCGG     | + | 5 | 1 | 0 | 7.16 | 3.58 |
| Chr1:298705082-298705104  | 298705087 | 3 | RNA | GGCCGAGGTCGACTACCGGNNRG   | GaCGAGGcGcgCaAC--GCAAG      | + | 5 | 2 | 0 | 7.16 | 3.58 |
| Chr4:11090905-11090927    | 11090922  | 3 | RNA | GGCCGAGGTCGACTACCGGNNRG   | GGCtGcgATGcTtT--GGCAGG      | + | 5 | 2 | 0 | 7.16 | 3.58 |
| Chr3:106976798-106976820  | 106976816 | 2 | DNA | GGCCGAGGTCGACTACCGGNNRG   | cCGgGgGTGCACTGACaGGCGGG     | + | 5 | 1 | 0 | 7.16 | 3.58 |
| Chr10:128414405-128414427 | 128414423 | 2 | DNA | GGCCGAGGTCGACT--ACCGGNNRG | GgGtGAGGTtAaTtGGACCGGCGGG   | + | 5 | 2 | 0 | 7.16 | 3.58 |
| Chr1:129829565-129829587  | 129829582 | 3 | RNA | GGCCGAGGTCGACTACCGGNNRG   | GgGcGAGGTGCGtCTg--GGCGAG    | + | 4 | 2 | 0 | 7.16 | 3.58 |
| Chr3:59076867-59076889    | 59076872  | 3 | RNA | GGCCGAGGTCGACTACCGGNNRG   | GG--cCGGgGtGtCTGcGCGGG      | - | 5 | 2 | 0 | 7.16 | 3.58 |
| Chr4:151252361-151252383  | 151252377 | 4 | RNA | GGCCGAGGTCGACTACCGGNNRG   | G-aCGGGTTCGACgCaAGCGGG      | + | 5 | 1 | 0 | 7.16 | 3.58 |
| Chr8:79028944-79028966    | 79028949  | 3 | RNA | GGCCGAGGTCGACTACCGGNNRG   | G-CCaAGTTCGaaGACtCGCGG      | - | 5 | 1 | 0 | 7.16 | 3.58 |
| Chr4:22645704-22645726    | 22645708  | 2 | RNA | GGCCGAGGTCGACTACCGGNNRG   | GdGaaGAGGTGCAC-AaCGGcCGG    | - | 4 | 1 | 6 | 1.10 | 3.55 |
| Chr6:153135198-153135220  | 153135215 | 3 | RNA | GGCCGAGGTCGACTACCGGNNRG   | GtHCaAaGcGAG--ACtGGCGG      | + | 5 | 2 | 7 | 0.00 | 3.50 |
| Chr2:203927648-203927670  | 203927665 | 3 | DNA | G--GCCGAGGTCGACTACCGGNNRG | GATGACGgGTGCGACaAGaGCGGG    | + | 5 | 2 | 7 | 0.00 | 3.50 |
| Chr5:43118194-43118216    | 43118211  | 3 | RNA | GGCCGAGGTCGACTACCGGNNRG   | GrCCG--GtTgACaACCGGcCAG     | + | 5 | 2 | 7 | 0.00 | 3.50 |
| Chr5:34213261-34213283    | 34213278  | 3 | RNA | GGCCGAGGTCGACTACCGGNNRG   | G-aCGGGTTCGACaAGaGCGGG      | + | 5 | 1 | 7 | 0.00 | 3.50 |
| Chr1:11880949-11880971    | 11880956  | 5 | RNA | GGCCGAGGTCGACTACCGGNNRG   | GGCGGCGcgGACTg--GGCTGG      | - | 5 | 2 | 7 | 0.00 | 3.50 |
| Chr10:50507707-50507729   | 50507714  | 5 | RNA | GGCCGAGGTCGACTACCGGNNRG   | GrCCG--GtTgCAaCCGgaCAG      | - | 5 | 2 | 7 | 0.00 | 3.50 |
| Chr5:184500071-184500093  | 184500078 | 5 | RNA | GGCCGAGGTCGACTACCGGNNRG   | GGCTtGgGTgBgCTA--GGCTGG     | + | 5 | 2 | 7 | 0.00 | 3.50 |
| Chr8:101357451-101357473  | 101357458 | 3 | RNA | GGCCGAGGTCGACTACCGGNNRG   | aGcCGGAGGTCGACTACCGGNNRG    | + | 5 | 1 | 7 | 0.00 | 3.50 |
| Chr3:122575340-122575362  | 122575357 | 3 | RNA | GGCCGAGGTCGACTACCGGNNRG   | GGCGGcGCTCA--AaGCGCAAG      | + | 5 | 2 | 7 | 0.00 | 3.50 |
| Chr5:139807793-139807815  | 139807810 | 3 | DNA | GGCCGAGGTCGACT--ACCGGNNRG | GgGtCGAGGtTgTgACTGACCGGCGCG | + | 2 | 1 | 7 | 0.00 | 3.50 |
| Chr1:132397497-132397519  | 132397514 | 3 | RNA | GGCCGAGGTCGACTACCGGNNRG   | GGCaAGGCaC--ACTACaGcAGG     | + | 4 | 1 | 7 | 0.00 | 3.50 |
| Chr10:75544386-75544408   | 75544403  | 3 | X   | GGCCGAGGTCGACTACCGGNNRG   | GGCCGAGGTCGAGtTgGCGAG       | + | 5 | 0 | 7 | 0.00 | 3.50 |
| Chr1:82565696-82565718    | 82565713  | 3 | RNA | GGCCGAGGTCGACTACCGGNNRG   | ctCCGtGCTCA--ACCGGCAAG      | + | 5 | 2 | 7 | 0.00 | 3.50 |
| Chr4:94360303-94360325    | 94360310  | 5 | DNA | GGCCGAGGT--CGACTACCGGNNRG | GtAcGAGGgAActTCTACCGGCAAG   | - | 5 | 2 | 7 | 0.00 | 3.50 |
| Chr6:6243148-6243170      | 6243155   | 5 | RNA | GGCCGAGGTCGACTACCGGNNRG   | GGCCGAGGTCGtCTg--GGTGG      | - | 5 | 2 | 7 | 0.00 | 3.50 |
| Chr3:147242959-147242981  | 147242976 | 3 | RNA | GGCCGAGGTCGACTACCGGNNRG   | GGC--tGtTgGATtCGGCTGG       | + | 4 | 2 | 7 | 0.00 | 3.50 |
| Chr4:79771225-79771247    | 79771242  | 3 | RNA | GGCCGAGGTCGACTACCGGNNRG   | cCGCC--GTCTGGgACCGCGGAG     | + | 5 | 2 | 7 | 0.00 | 3.50 |
| Chr2:21040077-21040099    | 21040084  | 5 | RNA | GGCCGAGGTCGACTACCGGNNRG   | aGCaAGG--CGaAGgTCGCGGG      | - | 5 | 2 | 7 | 0.00 | 3.50 |
| Chr8:2789127-2789149      | 2789144   | 3 | RNA | GGCCGAGGTCGACTACCGGNNRG   | GGC--tcGgGACTACCGTCTGG      | - | 5 | 2 | 7 | 0.00 | 3.50 |
| Chr9:114322401-114322423  | 114322418 | 3 | RNA | GGCCGAGGTCGACTACCGGNNRG   | GGC--AlGTGCTCAaTCHCAAG      | + | 5 | 2 | 7 | 0.00 | 3.50 |
| Chr1:96423243-96423265    | 96423250  | 5 | RNA | GGCCGAGGTCGACTACCGGNNRG   | GgGcGG-GGcCaCctCGGCGGG      | - | 5 | 1 | 7 | 0.00 | 3.50 |
| Chr6:126437749-126437771  | 126437766 | 3 | RNA | GGCCGAGGTCGACTACCGGNNRG   | GGCCGAGtGAG--TtGcGcAAG      | + | 5 | 2 | 7 | 0.00 | 3.50 |
| Chr4:82973383-82973405    | 82973390  | 5 | RNA | GGCCGAGGTCGACTACCGGNNRG   | tG--GAGGaaGACTACCGCAAG      | - | 5 | 2 | 7 | 0.00 | 3.50 |
| Chr1:83586315-83586337    | 83586322  | 5 | RNA | GGCCGAGGTCGACTACCGGNNRG   | GaCaG--GGTTCGACaAGaGCGGG    | - | 5 | 1 | 7 | 0.00 | 3.50 |
| Chr9:81332157-81332179    | 81332174  | 3 | RNA | GGCCGAGGTCGACTACCGGNNRG   | G-aCGGGTTCGACaAGaGCGGG      | + | 5 | 1 | 7 | 0.00 | 3.50 |
| Chr2:123904469-123904491  | 123904486 | 3 | RNA | GGCCGAGGTCGACTACCGGNNRG   | GCCGAGGCaGCGcAgCaGCTGG      | + | 5 | 1 | 7 | 0.00 | 3.50 |
| Chr7:72631503-72631525    | 72631510  | 5 | RNA | GGCCGAGGTCGACTACCGGNNRG   | GGC--GAGTTCGACaAGaGtAG      | + | 5 | 1 | 7 | 0.00 | 3.50 |
| Chr7:89813178-89813200    | 89813195  | 3 | RNA | GGCCGAGGTCGACTACCGGNNRG   | aGcCGGAGGTCGACTACCGGNNRG    | + | 5 | 1 | 7 | 0.00 | 3.50 |
| Chr9:18535881-18535903    | 18535888  | 5 | DNA | GGCCGAGGT--CGACTACCGGNNRG | GGCtaAGGTGAaGAGaACCGGCGCG   | - | 5 | 2 | 7 | 0.00 | 3.50 |
| Chr5:98526228-98526250    | 98526245  | 5 | RNA | GGCCGAGGTCGACTACCGGNNRG   | GgGcGAG--CGACTAaGatCAGG     | + | 5 | 2 | 7 | 0.00 | 3.50 |
| Chr4:44065607-44065629    | 44065614  | 5 | DNA | GGC-CGAGGTGCACTACCGGNNRG  | GtCTGAGAGcGtGCTtCCGGCTGG    | - | 4 | 1 | 7 | 0.00 | 3.50 |
| Chr2:14961540-14961562    | 14961557  | 3 | RNA | GGCCGAGGTCGACTACCGGNNRG   | GtCGAGTTCGACaCaC--GCGGG     | + | 5 | 2 | 7 | 0.00 | 3.50 |
| Chr7:129103879-129103901  | 129103886 | 5 | RNA | GGCCGAGGTCGACTACCGGNNRG   | GGC--tcGgGACTACCGCTGG       | - | 4 | 2 | 7 | 0.00 | 3.50 |
| Chr6:154784775-154784797  | 154784782 | 5 | RNA | GGCCGAGGTCGACTACCGGNNRG   | G-CaGtGgaggACTACCGGCGG      | - | 5 | 1 | 7 | 0.00 | 3.50 |
| Chr3:171376425-171376447  | 171376442 | 3 | RNA | GGCCGAGGTCGACTACCGGNNRG   | GgGcGAGGTG--TtGCaGaaCAG     | + | 5 | 2 | 7 | 0.00 | 3.50 |
| Chr7:73073809-73073831    | 73073816  | 5 | RNA | GGCCGAGGTCGACTACCGGNNRG   | cCGCG--GTCTCtCaCGGCGCG      | + | 5 | 2 | 7 | 0.00 | 3.50 |
| Chr4:67786921-67786943    | 67786938  | 3 | DNA | GGC-CGAGGTGCACTACCGGNNRG  | GtCTACGgGtCACTtCCGGCTGG     | + | 5 | 1 | 7 | 0.00 | 3.50 |
| Chr4:17065740-17065762    | 17065747  | 5 | RNA | GGCCGAGGTCGACTACCGGNNRG   | GGCCGAGGTCGAGtGCTGGAG       | + | 5 | 1 | 7 | 0.00 | 3.50 |
| Chr2:78577394-78577416    | 78577401  | 5 | DNA | GGCCGAGGTCGACTACCGGNNRG   | GcCaAGCaGCaCAGtCCGCGCAG     | - | 5 | 2 | 7 | 0.00 | 3.50 |
| Chr8:46329914-46329936    | 46329931  | 3 | RNA | GGCCGAGGTCGACTACCGGNNRG   | GGCGGtGTCAGtA--GaCCGG       | + | 5 | 2 | 7 | 0.00 | 3.50 |
| Chr8:162864120-162864142  | 162864137 | 3 | DNA | GGC-CGAGGTGCACTACCGGNNRG  | GtCTCGAGGAGcGtGtCCGGCTGG    | + | 4 | 1 | 7 | 0.00 | 3.50 |
| Chr5:136819775-136819797  | 136819782 | 5 | RNA | GGCCGAGGTCGACTACCGGNNRG   | GGCCG--GcaaaACTCaGaAAG      | - | 5 | 2 | 7 | 0.00 | 3.50 |
| Chr5:17629262-17629284    | 17629269  | 5 | RNA | GGCCGAGGTCGACTACCGGNNRG   | GaCCGAGGT--GAGtCaAaGAG      | - | 5 | 1 | 7 | 0.00 | 3.50 |
| Chr1:208079284-208079306  | 208079291 | 5 | RNA | GGCCGAGGTCGACTACCGGNNRG   | GtACtAGGTG--TACCgGaAG       | - | 5 | 2 | 7 | 0.00 | 3.50 |
| Chr10:87020568-87020590   | 87020585  | 3 | RNA | GGCCGAGGTCGACTACCGGNNRG   | G-aCGGGTTCGACaAGaGCGGG      | + | 5 | 1 | 7 | 0.00 | 3.50 |
| Chr2:132714464-132714486  | 132714481 | 3 | RNA | GGCCGAGGTCGACTACCGGNNRG   | a--CGGGTTCGACaAGaGCGGG      | + | 5 | 2 | 7 | 0.00 | 3.50 |
| Chr2:19622822-19622844    | 19622839  | 3 | DNA | GGCCGAGG-TGCGACTACCGGNNRG | GtTCAGAGGTCTCaAGcGtGCGAG    | + | 5 | 1 | 7 | 0.00 | 3.50 |
| Chr8:115703111-115703128  | 115703128 | 3 | RNA | GGCCGAGGTCGACTACCGGNNRG   | GtCGAGGTCGAGaGtCACTCGG      | + | 5 | 1 | 7 | 0.00 | 3.50 |
| Chr1:182096085-182096107  | 182096092 | 5 | RNA | GGCCGAGGTCGACTACCGGNNRG   | G--CGAGGTGCGcgtGCGAG        | - | 5 | 2 | 7 | 0.00 | 3.50 |
| Chr1:58868607-58868629    | 58868624  | 3 | RNA | GGCCGAGGTCGACTACCGGNNRG   | G-CHAGGcGACTtCaAGaCAG       | + | 5 | 1 | 7 | 0.00 | 3.50 |
| Chr7:73019873-73019895    | 73019880  | 5 | RNA | GGCCGAGGTCGACTACCGGNNRG   | G-CHAGaTGCcTAgCTtCGCGG      | - | 5 | 1 | 7 | 0.00 | 3.50 |
| Chr2:188582221-188582243  | 188582238 | 3 | RNA | GGCCGAGGTCGACTACCGGNNRG   | GGC--tGcCaACTACCGCTGG       | + | 5 | 2 | 7 | 0.00 | 3.50 |
| Chr1:39089907-39089929    | 39089914  | 5 | RNA | GGCCGAGGTCGACTACCGGNNRG   | GG--GAGGagGtATAGGgCAAG      | - | 5 | 2 | 7 | 0.00 | 3.50 |
| Chr1:101060601-101060682  | 101060607 | 5 | DNA | GGCCGAGGTCGACTACCGG--CNRG | GGtCGAGGcGtAGtTgCTCGCTCCAG  | - | 5 | 2 | 7 | 0.00 | 3.50 |
| Chr8:155249330-155249352  | 155249337 | 5 | RNA | GGCCGAGGTCGACTACCGGNNRG   | tCGCGAGT-GACTtGtGaaGAG      | - | 5 | 1 | 7 | 0.00 | 3.50 |
| Chr4:60783612-60783634    | 60783619  | 5 | DNA | GGC--CGAGGTGCACTACCGGNNRG | GGCTCTCGGgGtCaACcCGGCGGG    | + | 5 | 2 | 7 | 0.00 | 3.50 |
| Chr2:183742862-183742884  | 183742869 | 5 | RNA | GGCCGAGGTCGACTACCGGNNRG   | GGC--ttGcCaACTACGtGtGG      | - | 5 | 2 | 7 | 0.00 | 3.50 |
| Chr4:194026935-194026957  | 194026942 | 3 | RNA | GGCCGAGGTCGACTACCGGNNRG   | GGCCGAGGTCGACTACCGGNNRG     | + | 5 | 1 | 7 | 0.00 | 3.50 |
| Chr10:20678206-20678228   | 20678203  | 3 | RNA | GGCCGAGGTCGACTACCGGNNRG   | GGC-GAGGCaGAAcTCCGCGAG      | + | 5 | 1 | 7 | 0.00 | 3.50 |
| Chr4:176549488-176549510  | 176549495 | 5 | RNA | GGCCGAGGTCGACTACCGGNNRG   | caCC-AGGTGcGtCACTGgAAG      | - | 5 | 1 | 7 | 0.00 | 3.50 |
| Chr8:70163945-70163967    | 70163952  | 5 | RNA | GGCCGAGGTCGACTACCGGNNRG   | GtGtGcGga--ACTACCGGaAAG     | - | 5 | 2 | 7 | 0.00 | 3.50 |
| Chr5:218107646-218107668  | 218107653 | 5 | DNA | GGCCGAGGTCGACTA--CCGGNNRG | aGCCAGGTGCACTAGCCGcaTGG     | - | 5 | 1 | 7 | 0.00 | 3.50 |
| Chr5:128710966-128710988  | 128710983 | 3 | RNA | GGCCGAGGTCGACTACCGGNNRG   | GaCaG--GGTTCGACaAGaGCGGG    | + | 5 | 1 | 7 | 0.00 | 3.50 |
| Chr3:78246029-78246051    | 78246036  | 5 | RNA | GGCCGAGGTCGACTACCGGNNRG   | GGCCGAGGTgAGa--CHGgaAG      | - | 5 | 2 | 7 | 0.00 | 3.50 |
| Chr1:69482345-69482367    | 69482362  | 3 | RNA | GGCCGAGGTCGACTACCGGNNRG   | GGC-GGCaCctGtTACCGGCGG      | + | 5 | 1 | 7 | 0.00 | 3.50 |
| Chr7:104890395-104890417  | 104890402 | 5 | RNA | GGCCGAGGTCGACTACCGGNNRG   | GGCCGgGtGtGtGtCTg--GGCTGG   | - | 5 | 2 | 7 | 0.00 | 3.50 |
| Chr2:290345962-290345984  | 290345979 | 3 | RNA | GGCCGAGGTCGACTACCGGNNRG   | GGaCAGAGG-CGAGgGtGtCTGG     | + | 5 | 1 | 7 | 0.00 | 3.50 |
| Chr3:59473846-59473868    | 59473853  | 5 | DNA | GGCCGAGGTCGACTACCGGNNRG   | GtCaAGGTCGACTA--CGAGGTCGG   | + | 5 | 1 | 7 | 0.00 | 3.50 |
| Chr8:111809383-111809405  | 111809390 | 5 | RNA | GGCCGAGGTCGACTACCGGNNRG   | GgGcGG-GGcCaCctCGGCGGG      | - | 5 | 1 | 7 | 0.00 | 3.50 |
| Chr5:32392655-32392677    | 32392672  | 3 | RNA | GGCCGAGGTCGACTACCGGNNRG   | GtHCAGaT--ACTtGgGCAAG       | + | 5 | 2 | 7 | 0.00 | 3.50 |
| Chr6:119742892-119742914  | 119742909 | 3 | RNA | GGCCGAGGTCGACTACCGGNNRG   | GtCTtGGT-GaCACCgGCGGG       | + | 5 | 1 | 7 | 0.00 | 3.50 |
| Chr1:252608099-252608121  | 252608106 | 5 | RNA | GGCCGAGGTCGACTACCGGNNRG   | caCAAGtGtGcGCT--CCGCGAG     | - | 5 | 1 | 7 | 0.00 | 3.50 |
| Chr6:142107425-142107447  | 142107442 | 3 | RNA | GGCCGAGGTCGACTACCGGNNRG   | GGC--AcactGACACCgGCGGG      | + | 5 | 2 | 7 | 0.00 | 3.50 |
| Chr2:83285025-83285047    | 83285042  | 3 | RNA | GGCCGAGGTCGACTACCGGNNRG   | GGCCAG--CGAagACtGgGAG       | + | 5 | 2 | 7 | 0.00 | 3.50 |

|                           |   |     |                           |                             |   |   |   |   |      |      |
|---------------------------|---|-----|---------------------------|-----------------------------|---|---|---|---|------|------|
| Chr10:101058734-101058756 | 5 | RNA | GGCCGAGGTCGACTACCGGNNRG   | GGCCGAGTgaGCT-CGgaCGG       | - | 5 | 2 | 7 | 0.00 | 3.50 |
| Chr3:76087062-76087084    | 3 | RNA | GGCCGAGGTCGACTACCGGNNRG   | GgGcGcGGTCGgCG-CGgGgAG      | + | 5 | 2 | 7 | 0.00 | 3.50 |
| Chr2:109839679-109839701  | 1 | RNA | GGCCGAGGTCGACTACCGGNNRG   | GGCCacGGcGgGcCT-cGGCGGAG    | + | 5 | 1 | 7 | 0.00 | 3.50 |
| Chr9:17097128-17097130    | 3 | RNA | GGCCGAGGTCGACTACCGGNNRG   | GGC-tcGGGACTACCGGCTGG       | - | 4 | 2 | 2 | 4.96 | 3.48 |
| Chr2:118375013-118375035  | 3 | RNA | GGCCGAGGTCGACTACCGGNNRG   | G-gGCGggaGAGcAGcCGGCTGG     | - | 5 | 2 | 3 | 3.86 | 3.43 |
| Chr7:12722114-12722116    | 2 | RNA | GGCCGAGGTCGACTACCGGNNRG   | GGCCGgGga-AaTcAGGCTACTAG    | + | 5 | 2 | 4 | 2.75 | 3.38 |
| Chr2:22063800-22063822    | 3 | RNA | GGCCGAGGTCGACTACCGGNNRG   | YG-AAGGTGCTgAGcgaGcGG       | + | 5 | 2 | 4 | 2.75 | 3.38 |
| Chr5:50331645-50331663    | 2 | RNA | GGCCGAGGTCGACTACCGGNNRG   | GcCAhGGTCGAGTTC-GCCAG       | + | 5 | 2 | 5 | 1.65 | 3.33 |
| Chr7:132883954-132883976  | 3 | RNA | GGCCGAGGTCGACTACCGGNNRG   | G-aCGGgGTCGACaCgaGcGGG      | - | 5 | 1 | 5 | 1.65 | 3.33 |
| Chr5:132656602-132656624  | 5 | RNA | GGCCGAGGTCGACTACCGGNNRG   | GgGcGcGTgTGACTA-GGTtGG      | + | 5 | 2 | 0 | 6.61 | 3.31 |
| Chr2:191357245-191357267  | 3 | RNA | GGCCGAGGTCGACTACCGGNNRG   | GGC-AGGcCGggaACtGGCGGG      | - | 5 | 2 | 0 | 6.61 | 3.31 |
| Chr7:112767413-112767435  | 5 | RNA | GGCCGAGGTCGACTACCGGNNRG   | GHCCGtGT--ACACCGGgaAG       | - | 5 | 2 | 0 | 6.61 | 3.31 |
| Chr4:209877700-209877722  | 3 | RNA | GGCCGAGGTCGACTACCGGNNRG   | GGCCGAGGgagGAaggC-CGGGG     | - | 5 | 2 | 0 | 6.61 | 3.31 |
| Chr1:149914618-149914640  | 1 | RNA | GGCCGAGGTCGACTACCGGNNRG   | ag-GACgAGcAGTAgCaGcAGG      | + | 5 | 2 | 0 | 6.61 | 3.31 |
| Chr5:141994705-141994727  | 4 | RNA | GGCCGAGGTCGACTACCGGNNRG   | cGgCGAGGTGGA-AGcCTGCTGG     | + | 5 | 2 | 0 | 6.61 | 3.31 |
| Chr1:62812157-62812179    | 2 | RNA | GGCCGAGGTCGACTACCGGNNRG   | GgGcAGGcGGA-CGgCAAG         | + | 5 | 2 | 0 | 6.61 | 3.31 |
| Chr7:150943166-150943188  | 3 | RNA | GGCCGAGGTCGACTACCGGNNRG   | G-aCGGgGTCGACaCgaGcGGG      | - | 5 | 1 | 0 | 6.61 | 3.31 |
| Chr4:343501-436523        | 5 | RNA | GGCCGAGGTCGACTACCGGNNRG   | ctG-GHGGTCGAGcAGcGCTGG      | - | 5 | 2 | 0 | 6.61 | 3.31 |
| Chr9:62104788-62104810    | 2 | DNA | GGCCGAGGTCGACTACCGGNNRG   | GgGcAGtAtTCggTACCgGTTcCAGG  | - | 5 | 2 | 0 | 6.61 | 3.31 |
| Chr8:126611744-126611766  | 2 | RNA | GGCCGAGGTCGACTACCGGNNRG   | GGCCctGGT-CaCCTCGGAG        | + | 4 | 2 | 0 | 6.61 | 3.31 |
| Chr7:154322906-154322928  | 5 | RNA | GGCCGAGGTCGACTACCGGNNRG   | GGCCAGGcGgGcCT-CgGtGGTG     | - | 4 | 1 | 0 | 6.61 | 3.31 |
| Chr8:104798108-104798130  | 3 | RNA | GGCCGAGGTCGACTACCGGNNRG   | caCAaGTGCTGCT-CCGGCCAG      | + | 5 | 1 | 0 | 6.61 | 3.31 |
| Chr3:210542609-210542631  | 3 | DNA | GGCCGAGGTCGACTA--CCGCGNAG | ctTCAAGcGcGCAaATCCGGGcAGG   | - | 5 | 2 | 0 | 6.61 | 3.31 |
| Chr2:13460991-13461013    | 3 | RNA | GGCCGAGGTCGACTACCGGNNRG   | GgGcG-GGcCAcctCCGGCCGG      | - | 5 | 1 | 0 | 6.61 | 3.31 |
| Chr2:118653539-118653561  | 2 | RNA | GGCCGAGGTCGACTACCGGNNRG   | GGTCAGGagGAa-CaAGcCAAG      | - | 5 | 2 | 0 | 6.61 | 3.31 |
| Chr1:7065933-706615       | 2 | DNA | GGCCGAGGTCGACTACCGGNNRG   | GgGcCGgGTCGAGcgaAGcCGGgGG   | - | 5 | 2 | 0 | 6.61 | 3.31 |
| Chr2:170420095-170420117  | 3 | DNA | GGCCGAGGTCGACTA--CCGCGNAG | ctTCAGGcGcGCAaATCCGGGcAG    | - | 5 | 2 | 0 | 6.61 | 3.31 |
| Chr8:154675293-154675315  | 3 | DNA | G-CCGAGGTCGACTACCGGNNRG   | GGCCctGgGcGAgTACtGGCAGG     | + | 5 | 1 | 0 | 6.61 | 3.31 |
| Chr4:140230920-140230942  | 2 | RNA | GGCCGAGGTCGACTACCGGNNRG   | a-CGgGTCGACaCgaGcGGG        | + | 5 | 2 | 0 | 6.61 | 3.31 |
| Chr4:93762624-93762646    | 5 | RNA | GGCCGAGGTCGACTACCGGNNRG   | cGgGAGcGctGA-ACCGCGGAG      | - | 5 | 2 | 0 | 6.61 | 3.31 |
| Chr7:110131344-110131366  | 1 | RNA | GGCCGAGGTCGACTACCGGNNRG   | ctG-AGGggGAaTACtGCTGG       | - | 5 | 2 | 0 | 6.61 | 3.31 |
| Chr7:117228090-117228112  | 2 | RNA | GGCCGAGGTCGACTACCGGNNRG   | cGgaGAGTGTGAGcACCC--tGAG    | - | 5 | 2 | 0 | 6.61 | 3.31 |
| Chr5:72879057-72879079    | 5 | RNA | GGCCGAGGTCGACTACCGGNNRG   | GGCGGAaTCCctCTCC-CTGG       | + | 5 | 2 | 0 | 6.61 | 3.31 |
| Chr7:113449336-113449358  | 3 | RNA | GGCCGAGGTCGACTACCGGNNRG   | GGC-tcGTgACTACCGCTGG        | + | 3 | 2 | 0 | 6.61 | 3.31 |
| Chr2:132941984-132942006  | 3 | RNA | GGCCGAGGTCGACTACCGGNNRG   | GGTCGAGGT-GACaAaGgaCAGG     | - | 5 | 1 | 0 | 6.61 | 3.31 |
| Chr1:1286460736-128646094 | 4 | RNA | GGCCGAGGTCGACTACCGGNNRG   | GgGcCGAGGTCGAG-CtCGcAGTGG   | - | 5 | 1 | 0 | 6.61 | 3.31 |
| Chr1:36204131-36204153    | 3 | RNA | GGCCGAGGTCGACTACCGGNNRG   | GgGcCG-GGcCAcCctCCGGCCGG    | - | 5 | 1 | 0 | 6.61 | 3.31 |
| Chr3:134841581-134841603  | 3 | RNA | GGCCGAGGTCGACTACCGGNNRG   | GgGcG-GGcCAcCctCCGGCCGG     | + | 5 | 1 | 0 | 6.61 | 3.31 |
| Chr7:107967449-107967471  | 5 | RNA | GGCCGAGGTCGACTACCGGNNRG   | GgGCGAGcGcGCA-AggGgGAG      | + | 5 | 2 | 0 | 6.61 | 3.31 |
| Chr1:246890071-246890093  | 3 | RNA | GGCCGAGGTCGACTACCGGNNRG   | G-aCGGgGTCGACaCaaGcGGG      | - | 5 | 1 | 0 | 6.61 | 3.31 |
| Chr1:134587246-134587268  | 3 | RNA | GGCCGAGGTCGACTACCGGNNRG   | acCGAGcCTGAGTTC--CGCGG      | - | 5 | 2 | 0 | 6.61 | 3.31 |
| Chr8:76911959-76911981    | 4 | DNA | GGCCGAGGTCGACTACCGGNNRG   | tGacGAGGgGcGAGcACGGcGacCAAG | - | 5 | 2 | 0 | 6.61 | 3.31 |
| Chr5:223334173-223334195  | 5 | RNA | GGCCGAGGTCGACTACCGGNNRG   | Gga-GAGGaaGcAGcAgCGGCGG     | + | 5 | 1 | 0 | 6.61 | 3.31 |
| Chr5:31582421-31582443    | 5 | DNA | GGC-CGAGGTGACTACCGGNNRG   | GGCCTCGgGgGcCAacCGGCGGG     | - | 5 | 2 | 0 | 6.61 | 3.31 |
| Chr1:62811430-62811452    | 3 | RNA | GGCCGAGGTCGACTACCGGNNRG   | G-cCGGgGTTCGAGcAgGcGGG      | - | 5 | 1 | 0 | 6.61 | 3.31 |
| Chr8:26953026-26953048    | 4 | RNA | GGCCGAGGTCGACTACCGGNNRG   | G-aCGGgGTCGACaCgaGcGGG      | - | 5 | 1 | 0 | 6.61 | 3.31 |
| Chr2:158280105-158280127  | 2 | RNA | GGCCGAGGTCGACTACCGGNNRG   | GGCCcGA-CGAGTgTCGgGgGG      | - | 5 | 2 | 0 | 6.61 | 3.31 |
| Chr2:167850650-167850672  | 4 | RNA | GGCCGAGGTCGACTACCGGNNRG   | GHTCGAGcTCG-TACtGGAAG       | - | 5 | 2 | 0 | 6.61 | 3.31 |
| Chr4:222910238-222910260  | 2 | RNA | GGCCGAGGTCGACTACCGGNNRG   | GHCCG-GaaGAGTACCGgaAAG      | + | 5 | 2 | 0 | 6.61 | 3.31 |
| Chr10:42821618-42821640   | 4 | RNA | GGCCGAGGTCGACTACCGGNNRG   | G-CGtGGhGACTACCGgTGG        | - | 5 | 2 | 0 | 6.61 | 3.31 |
| Chr2:26710193-26710215    | 2 | RNA | GGCCGAGGTCGACTACCGGNNRG   | GgGcGgGCTGAGcAG-CggaAGG     | - | 5 | 1 | 0 | 6.61 | 3.31 |
| Chr4:39844606-39844628    | 2 | RNA | GGCCGAGGTCGACTACCGGNNRG   | GGC-tcGagGACTACCGCTGG       | + | 4 | 2 | 0 | 6.61 | 3.31 |
| Chr1:242800982-242801004  | 2 | RNA | GGCCGAGGTCGACTACCGGNNRG   | G-tGAGGcGTAGcACCGGCCAG      | + | 5 | 2 | 0 | 6.61 | 3.31 |
| Chr1:119652003-119652025  | 4 | DNA | GGC-CGAGGTGACTACCGGNNRG   | GcCTCGAGGgaGCTTCaGtCTAG     | - | 5 | 1 | 0 | 6.61 | 3.31 |
| Chr4:195261284-195261306  | 3 | RNA | GGCCGAGGTCGACTACCGGNNRG   | GGCTcAc-aGACTACCGCTGG       | - | 4 | 2 | 0 | 6.61 | 3.31 |
| Chr10:36951947-36951969   | 3 | RNA | GGCCGAGGTCGACTACCGGNNRG   | G-cGgGAGcGAG-CtCGcCAAG      | - | 5 | 1 | 0 | 6.61 | 3.31 |
| Chr3:26127355-26127377    | 4 | RNA | GGCCGAGGTCGACTACCGGNNRG   | aAaCGGgGTGACTCA-GGgGAG      | - | 5 | 2 | 0 | 6.61 | 3.31 |
| Chr1:29483704-29483726    | 2 | DNA | GGC-CGAGGTGACTACCGGNNRG   | cGCTGAGGTCAaCctGgGCGAG      | - | 4 | 1 | 0 | 6.61 | 3.31 |
| Chr9:58043514-58043536    | 5 | RNA | GGCCGAGGTCGACTACCGGNNRG   | GGCCGAGcTCAcCctCTCGCCAG     | - | 5 | 1 | 0 | 6.61 | 3.31 |
| Chr3:232572372-232572394  | 2 | RNA | GGCCGAGGTCGACTACCGGNNRG   | tGcGAGGTGgACa-CcGCGAG       | + | 5 | 2 | 0 | 6.61 | 3.31 |
| Chr2:4237640-4237662      | 2 | DNA | GGCC-GAGGTGACTACCGGNNRG   | GHCCAGAGcGACaCaacCGGCCG     | - | 5 | 1 | 0 | 6.61 | 3.31 |
| Chr3:226146250-226146272  | 2 | RNA | GGCCGAGGTCGACTACCGGNNRG   | GcCCGAGcGcGCA-ActcGgTGG     | - | 5 | 2 | 0 | 6.61 | 3.31 |
| Chr2:228863194-228863216  | 2 | RNA | GGCCGAGGTCGACTACCGGNNRG   | GcGcAGcGcGAC-CGtCGAGG       | + | 5 | 2 | 0 | 6.61 | 3.31 |
| Chr8:160556769-160556791  | 3 | RNA | GGCCGAGGTCGACTACCGGNNRG   | G-aCGGgGTCGACaCaaGcCGGG     | - | 5 | 1 | 0 | 6.61 | 3.31 |
| Chr9:78187110-78187132    | 4 | RNA | GGCCGAGGTCGACTACCGGNNRG   | G-cCGGgGTTCGAGcAgGcGGG      | - | 4 | 2 | 0 | 6.61 | 3.31 |
| Chr5:17994095-17994117    | 2 | RNA | GGCCGAGGTCGACTACCGGNNRG   | GcCGGAGGTGAGcACTACCGGAG     | - | 5 | 1 | 0 | 6.61 | 3.31 |
| Chr3:262657980-262658002  | 2 | RNA | GGCCGAGGTCGACTACCGGNNRG   | GGCCGAGcGgGCA-gACcGcGGG     | + | 5 | 1 | 0 | 6.61 | 3.31 |
| Chr6:48834209-48834231    | 2 | DNA | GGCCGAGGTCGACTACCGGNNRG   | GGCCGAGGTGgGcTgGCGGCTAG     | - | 5 | 1 | 0 | 6.61 | 3.31 |
| Chr1:173662124-173662146  | 3 | RNA | GGCCGAGGTCGACTACCGGNNRG   | GGC-AGGcCAcCctCGGCTGG       | + | 4 | 2 | 0 | 6.61 | 3.31 |
| Chr2:129399458-129399480  | 4 | DNA | GGCCGAGGTCGACTACCGGNNRG   | GgGcCAcAcTCGACTCTACCGCGAG   | - | 5 | 2 | 0 | 6.61 | 3.31 |
| Chr9:76346098-76346120    | 5 | RNA | GGCCGAGGTCGACTACCGGNNRG   | GACgaAGGTgAGTCA-GtCAGG      | + | 5 | 2 | 0 | 6.61 | 3.31 |
| Chr7:56579233-56579255    | 4 | RNA | GGCCGAGGTCGACTACCGGNNRG   | GGCCGAtCTCG-aATcAGCAAG      | - | 5 | 2 | 0 | 6.61 | 3.31 |
| Chr8:59924109-59924131    | 5 | DNA | GGCCGAGGTCGACTACCGGNNRG   | GcTCGAGCGggaGAGcACCGGCTGG   | + | 5 | 2 | 0 | 6.61 | 3.31 |
| Chr8:126646991-126647013  | 2 | RNA | GGCCGAGGTCGACTACCGGNNRG   | GGCCGAGGTTCG-ggGgaGcGG      | - | 5 | 2 | 0 | 6.61 | 3.31 |
| Chr3:152155382-152155404  | 4 | DNA | GGC-CGAGGTGACTACCGGNNRG   | GGCTCTagGgaGCTCTCCGCGAAG    | - | 5 | 2 | 0 | 6.61 | 3.31 |
| Chr1:32038881-32038903    | 3 | RNA | GGCCGAGGTCGACTACCGGNNRG   | G-aCGGgGTCGACaCgaGcGGG      | - | 5 | 1 | 0 | 6.61 | 3.31 |
| Chr5:9266775-9266779      | 5 | RNA | GGCCGAGGTCGACTACCGGNNRG   | GGCCcAGcGcGCA-ACcGcCCAG     | + | 4 | 2 | 0 | 6.61 | 3.31 |
| Chr6:84303473-84303495    | 2 | RNA | GGCCGAGGTCGACTACCGGNNRG   | GcCCGAGcctCGAT--CGtAGAG     | - | 5 | 2 | 0 | 6.61 | 3.31 |
| Chr2:22314149-22314171    | 3 | RNA | GGCCGAGGTCGACTACCGGNNRG   | ctHCGAGGTTCa-gACTGGCAAG     | - | 5 | 1 | 0 | 6.61 | 3.31 |
| Chr1:20374787-20374809    | 5 | RNA | GGCCGAGGTCGACTACCGGNNRG   | GGC-AGGcGAGcActcTCGGG       | + | 5 | 2 | 0 | 6.61 | 3.31 |
| Chr2:190325651-190325673  | 4 | RNA | GGCCGAGGTCGACTACCGGNNRG   | tGtaAGAT-GAaTACCGGCTGG      | - | 5 | 1 | 0 | 6.61 | 3.31 |
| Chr4:62678695-62678717    | 4 | DNA | GGC-CGAGGTGACTACCGGNNRG   | GcCTCGgGAGcGCTcTCGGCTGG     | - | 5 | 1 | 0 | 6.61 | 3.31 |
| Chr1:116873093-116873115  | 2 | RNA | GGCCGAGGTCGACTACCGGNNRG   | GG--hAtHqGCTGACCGGtGAG      | + | 5 | 2 | 0 | 6.61 | 3.31 |
| Chr3:26264873-26264895    | 3 | RNA | GGCCGAGGTCGACTACCGGNNRG   | G-aCGGgGTCGACaCgaGcGGG      | - | 5 | 1 | 0 | 6.61 | 3.31 |
| Chr2:149630338-149630360  | 2 | RNA | GGCCGAGGTCGACTACCGGNNRG   | GGC-AGGcCAcCctCCGGCCGG      | + | 4 | 2 | 0 | 6.61 | 3.31 |
| Chr1:117372166-117372188  | 4 | RNA | GGCCGAGGTCGACTACCGGNNRG   | GGC-HSGGAGTCTACCGCTGG       | - | 4 | 2 | 0 | 6.61 | 3.31 |
| Chr4:217698302-217698324  | 3 | RNA | GGCCGAGGTCGACTACCGGNNRG   | GgGcCGGcGTCGA-ACcGacAGG     | + | 5 | 2 | 0 | 6.61 | 3.31 |
| Chr3:160982243-160982265  | 5 | RNA | GGCCGAGGTCGACTACCGGNNRG   | GGC-tGcgaGACTACCGCTGG       | - | 5 | 2 | 0 | 6.61 | 3.31 |
| Chr2:162923118-162923130  | 5 | RNA | GGCCGAGGTCGACTACCGGNNRG   | GGCCGAGcGcGCA-gAGtGGCCAG    | + | 5 | 1 | 0 | 6.61 | 3.31 |
| Chr1:101470370-101470392  | 3 | DNA | GGCCGAGGTCGACTACCGGNNRG   | GHTCGAGGTGTCaAGcAGtGGCAGG   | - | 5 | 1 | 0 | 6.61 | 3.31 |
| Chr9:15776841-15776863    | 2 | DNA | GGCCGAGGTCGACTACCGGNNRG   | GGGcGAGGTGcGTCgAGaGGCCAG    | + | 4 | 2 | 0 | 6.61 | 3.31 |
| Chr4:20014171-200141193   | 3 | DNA | GGCCGAGGTCGACTA--CCGCGNAG | ctGtaaAGGTTCGACaAATCCGGCAGG | - | 5 | 2 | 0 | 6.61 | 3.31 |
| Chr1:168558804-168558826  | 3 | RNA | GGCCGAGGTCGACTACCGGNNRG   | G-aCGAGGTGACaCgaGcGGG       | - | 4 | 1 | 0 | 6.61 | 3.31 |
| Chr2:206435290-206435312  | 4 | RNA | GGCCGAGGTCGACTACCGGNNRG   | G-CTcGGGcGGAATCTGGCAGG      | - | 5 | 1 | 0 | 6.61 | 3.31 |
| Chr1:68850688-68850710    | 5 | RNA | GGCCGAGGTCGACTACCGGNNRG   | GGC-AGGcCAcCctCCGGCCGG      | - | 4 | 2 | 0 | 6.61 | 3.31 |
| Chr5:28838900-28838922    | 5 | RNA | GGCCGAGGTCGACTACCGGNNRG   | GcCTCGGcGgaGAT--CGCGGG      | + | 5 | 1 | 0 | 6.61 | 3.31 |
| Chr3:73329873-73329895    | 3 | DNA | GGCCGAGGTCGACTA--CCGCGNAG | GgGcCGgGATgGACaACTCCGCGGAG  | - | 4 | 2 | 6 | 0.55 | 3.28 |
| Chr1:129429467-129429489  | 4 | DNA | GGCCGAGGTCGACTACCGGNNRG   | GcCGAGAGcGCAcCACCATGGCCAG   | + | 5 | 2 | 6 | 0.55 | 3.28 |
| Chr4:83512534-83512556    | 2 | RNA | GGCCGAGGTCGACTACCGGNNRG   | GaCTcAGTTCGCTTgGcCGCGG      | + | 5 | 1 | 6 | 0.55 | 3.28 |
| Chr4:183244851-183244873  | 3 | RNA | GGCCGAGGTCGACTACCGGNNRG   | G-aCGGgGTCGACaCgaGcGGG      | - | 5 | 1 | 6 | 0.55 | 3.28 |
| Chr6:113403735-113403757  | 3 | RNA | GGCCGAGGTCGACTACCGGNNRG   | GGC-tHcGAGTACTACCGCTGG      | - | 4 | 2 | 6 | 0.55 | 3.28 |
| Chr5:65009067-65009089    | 4 | RNA | GGCCGAGGTCGACTACCGGNNRG   | G-aCGGgaTGCAGaCaaGcGGG      | + | 5 | 1 | 2 | 4.   |      |

|                           |   |     |                            |                             |   |   |   |   |      |      |
|---------------------------|---|-----|----------------------------|-----------------------------|---|---|---|---|------|------|
| Chr5:47727559-47727581    | 5 | DNA | GGCCGAGGTCGACT-ACCGGCNRG   | GGCTCAGGTacAATGAaCGGCCAG    | - | 5 | 2 | 0 | 6.06 | 3.03 |
| Chr8:94051057-94051079    | 4 | RNA | GGCCGAGGTCGACTACCGGNNRG    | GGCCGAGGTCG-ggCGagCGG       | + | 5 | 2 | 0 | 6.06 | 3.03 |
| Chr1:290316383-290316405  | 2 | RNA | GGCCGAGGTCGACTACCGGNNRG    | GGCCGAGGTCG-ggCGagCGG       | - | 5 | 2 | 0 | 6.06 | 3.03 |
| Chr4:180668802-180668824  | 4 | RNA | GGCCGAGGTCGACTACCGGNNRG    | G-aCGGGTCGAGCaCGaCGCGG      | + | 5 | 1 | 0 | 6.06 | 3.03 |
| Chr1:39102091-39102113    | 2 | RNA | GGCCGAGGTCGACTACCGGNNRG    | C-CGAGGTCaACaCacCAAG        | + | 5 | 2 | 0 | 6.06 | 3.03 |
| Chr2:164021552-164021574  | 4 | DNA | GGC-CGAGGTCGACTACCGGNNRG   | GCTCTCGAGGTCCTCCGCTCGG      | - | 4 | 1 | 0 | 6.06 | 3.03 |
| Chr10:49463482-49463504   | 5 | RNA | GGCCGAGGTCGACTACCGGNNRG    | caCCAGG-GACTTgCCGCGAG       | - | 5 | 2 | 0 | 6.06 | 3.03 |
| Chr5:119153448-119153470  | 4 | RNA | GGCCGAGGTCGACTACCGGNNRG    | GGCCGAGGTgGgtTgCC-HGAG      | + | 5 | 2 | 0 | 6.06 | 3.03 |
| Chr10:57989987-57990009   | 5 | RNA | GGCCGAGGTCGACTACCGGNNRG    | GGC-tcGgGACTACGCTGG         | + | 5 | 2 | 0 | 6.06 | 3.03 |
| Chr1:257619477-257619499  | 3 | RNA | GGCCGAGGTCGACTACCGGNNRG    | GGCCAGCaGagT-gACCGGCTGG     | + | 5 | 2 | 0 | 6.06 | 3.03 |
| Chr9:59711973-59711995    | 5 | RNA | GGCCGAGGTCGACTACCGGNNRG    | GTC-tctTGACTACCGGCCGG       | + | 5 | 2 | 0 | 6.06 | 3.03 |
| Chr5:735500-735522        | 4 | RNA | GGCCGAGGTCGACTACCGGNNRG    | GGC-GAGGTCGaggACtHgAGG      | + | 5 | 1 | 0 | 6.06 | 3.03 |
| Chr3:7908094-79081016     | 4 | RNA | GGCCGAGGTCGACTACCGGNNRG    | GGTCGGGTGCAC-CgGaaCGG       | + | 5 | 2 | 0 | 6.06 | 3.03 |
| Chr5:182735082-182735104  | 2 | RNA | GGCCGAGGTCGACTACCGGNNRG    | GG-GAGGaaGgCGACCGGaaAG      | - | 5 | 2 | 0 | 6.06 | 3.03 |
| Chr9:132573667-132573689  | 3 | RNA | GGCCGAGGTCGACTACCGGNNRG    | G-aCGGGTCGACaACgagCGCGG     | - | 5 | 1 | 0 | 6.06 | 3.03 |
| Chr5:61844852-61844874    | 2 | RNA | GGCCGAGGTCGACTACCGGNNRG    | GGCGAGaGTCGCTCTCC-gGCG      | - | 5 | 2 | 0 | 6.06 | 3.03 |
| Chr3:199670664-199670686  | 5 | RNA | GGCCGAGGTCGACTACCGGNNRG    | cCG-tcGTGACTACCGGCTGG       | + | 4 | 2 | 0 | 6.06 | 3.03 |
| Chr10:73463374-73463396   | 5 | RNA | GGCCGAGGTCGACTACCGGNNRG    | GGT-GHGTCTGaggACtGCGGAG     | - | 5 | 1 | 0 | 6.06 | 3.03 |
| Chr3:45464703-45464725    | 5 | DNA | GGCCGAGGTCGACTACCGG-CNNRG  | GGTCGAGGTCGAGTcCGaGCCCTGG   | - | 5 | 2 | 0 | 6.06 | 3.03 |
| Chr1:109199431-109199453  | 3 | RNA | GGCCGAGGTCGACTACCGGNNRG    | G-CGAGGTCaATACCGaTGG        | + | 5 | 2 | 0 | 6.06 | 3.03 |
| Chr2:106623030-106623052  | 2 | RNA | GGCCGAGGTCGACTACCGGNNRG    | GGCCGAGG-GCGTgggCGCGG       | - | 5 | 1 | 0 | 6.06 | 3.03 |
| Chr5:55733352-55733374    | 3 | RNA | GGCCGAGGTCGACTACCGGNNRG    | GgtGtggGgCGA-ACCGCCCGG      | - | 4 | 2 | 0 | 6.06 | 3.03 |
| Chr7:52762499-52762521    | 2 | DNA | GGCC-GAGGTGCTACTACCGGNNRG  | GGCCAGGCGagGACTACtGCGCGG    | + | 4 | 1 | 0 | 6.06 | 3.03 |
| Chr2:40021028-40021050    | 4 | RNA | GGCCGAGGTCGACTACCGGNNRG    | T-CGAGGCGtCACCGCGCGG        | - | 5 | 2 | 0 | 6.06 | 3.03 |
| Chr8:33512836-33512858    | 3 | DNA | GGCCGAGGTCGACT-ACCGGCNRG   | GtGgAGAGTgGtCTGAGCGGCGG     | + | 5 | 2 | 0 | 6.06 | 3.03 |
| Chr5:180616727-180616749  | 4 | RNA | GGCCGAGGTCGACTACCGGNNRG    | caCAGAGGTC-CGCGGCGAG        | + | 5 | 2 | 0 | 6.06 | 3.03 |
| Chr8:45366222-45366244    | 5 | RNA | GGCCGAGGTCGACTACCGGNNRG    | GgGc-AGGcCaACctCCGCGCGG     | + | 5 | 1 | 0 | 6.06 | 3.03 |
| Chr9:97776243-97776265    | 5 | RNA | GGCCGAGGTCGACTACCGGNNRG    | GGCGaHTCaACT-CGtGgAGG       | - | 5 | 1 | 0 | 6.06 | 3.03 |
| Chr2:204428188-204428210  | 5 | RNA | GGCCGAGGTCGACTACCGGNNRG    | GGC-AGGcCagCtCCGCGCGG       | - | 5 | 2 | 0 | 6.06 | 3.03 |
| Chr9:4324450-4324472      | 3 | DNA | GG-CGAGGTCGACTACCGGNNRG    | GGATCaAGaGTcACTtCaGGCAAG    | - | 5 | 2 | 0 | 6.06 | 3.03 |
| Chr6:61842309-61842331    | 3 | RNA | GGCCGAGGTCGACTACCGGNNRG    | GGTCGGCTCTGCAC-ACgagCTGG    | - | 5 | 1 | 0 | 6.06 | 3.03 |
| Chr8:51395291-51395313    | 2 | RNA | GGCCGAGGTCGACTACCGGNNRG    | GGC-AGCTCgGTCtCCGCTCGG      | + | 4 | 2 | 0 | 6.06 | 3.03 |
| Chr2:192273889-192273911  | 2 | RNA | GGCCGAGGTCGACTACCGGNNRG    | GG-AGcTAcACTggCGCGCGG       | - | 5 | 2 | 0 | 6.06 | 3.03 |
| Chr2:31312277-31312299    | 3 | RNA | GGCCGAGGTCGACTACCGGNNRG    | GGC-tcGTGACTACGtGACTGG      | + | 4 | 2 | 0 | 6.06 | 3.03 |
| Chr10:21375920-21375942   | 2 | RNA | GGCCGAGGTCGACTACCGGNNRG    | GagTgAGGTCCACTACC-gAG       | - | 5 | 2 | 0 | 6.06 | 3.03 |
| Chr6:7725701-77257127     | 5 | DNA | GGCCGAGGTCGACTACCGG-CNNRG  | CGCGAGGCaAagCTCCGCGCGAG     | + | 5 | 2 | 0 | 6.06 | 3.03 |
| Chr8:59936404-59936426    | 3 | DNA | GGCCGAGGTCGACTA-CCGCGNNRG  | GGGcGAGcThcTACTCCGCGCGG     | - | 5 | 2 | 0 | 6.06 | 3.03 |
| Chr2:84193865-84193887    | 4 | RNA | GGCCGAGGTCGACTACCGGNNRG    | tGCGAGGTC-ACgACaCGACGG      | + | 5 | 1 | 0 | 6.06 | 3.03 |
| Chr4:151080712-151080734  | 5 | RNA | GGCCGAGGTCGACTACCGGNNRG    | ttCCAGGTCGAGtGc-CGCGG       | + | 5 | 2 | 0 | 6.06 | 3.03 |
| Chr2:20305841-20305863    | 2 | RNA | GGCCGAGGTCGACTACCGGNNRG    | GgCtcAGG-GgCTACTGtCGGG      | - | 5 | 2 | 0 | 6.06 | 3.03 |
| Chr2:151877121-151877143  | 3 | DNA | G-GCCGAGGTCGACTACCGGNNRG   | GATGacGGGTGGTCGACaACgagCGGG | + | 5 | 2 | 0 | 6.06 | 3.03 |
| Chr4:33373228-33373250    | 4 | RNA | GGCCGAGGTCGACTACCGGNNRG    | aGacGAGGgGCGAC-CtHgGcAG     | + | 5 | 2 | 0 | 6.06 | 3.03 |
| Chr8:100193135-100193157  | 3 | RNA | GGCCGAGGTCGACTACCGGNNRG    | G-aCGGGTCGAGCaCGaCGCGG      | - | 5 | 1 | 0 | 6.06 | 3.03 |
| Chr4:16146845-16146867    | 4 | RNA | GGCCGAGGTCGACTACCGGNNRG    | tG-GAGGaaGAGACtCGCGCGG      | + | 5 | 2 | 0 | 6.06 | 3.03 |
| Chr4:18107698-181076720   | 4 | RNA | GGCCGAGGTCGACTACCGGNNRG    | aGacACaGcGACTACAC-gaTAAG    | + | 5 | 2 | 0 | 6.06 | 3.03 |
| Chr1:170076236-170076258  | 2 | DNA | GGC-CGAGGTCGACTACCGGNNRG   | GCTCTCGAGGTCCTCCGCTCGG      | - | 4 | 1 | 0 | 6.06 | 3.03 |
| Chr5:166179889-166179911  | 3 | RNA | GGCCGAGGTCGACTACCGGNNRG    | GGC-AGGcCaACctCCGCGCGG      | - | 4 | 2 | 0 | 6.06 | 3.03 |
| Chr3:68259948-68259970    | 4 | RNA | GGCCGAGGTCGACTACCGGNNRG    | G-aCGGGTCGAGCaCGaCGCGGG     | + | 5 | 1 | 0 | 6.06 | 3.03 |
| Chr5:20291371-20291393    | 4 | RNA | GGCCGAGGTCGACTACCGGNNRG    | GgGcGAGGgCGA-ACCAGCTGG      | + | 5 | 2 | 0 | 6.06 | 3.03 |
| Chr1:52972018-52972040    | 4 | RNA | GGCCGAGGTCGACTACCGGNNRG    | GTCCG-GTgTcACaCCGAGCaAG     | + | 5 | 2 | 0 | 6.06 | 3.03 |
| Chr4:234537134-234537156  | 4 | DNA | GGCCGAGGTCGACTACC-GGCNNRG  | GGCaGAGGTGtCGggCaGAGGCGCAG  | + | 5 | 2 | 0 | 6.06 | 3.03 |
| Chr3:106063514-106063536  | 5 | RNA | GGCCGAGGTCGACTACCGGNNRG    | GTCCG-GTgTcACaCCGAGCaAG     | - | 5 | 2 | 0 | 6.06 | 3.03 |
| Chr1:117362439-117362461  | 2 | RNA | GGCCGAGGTCGACTACCGGNNRG    | C-CGAGGTCGACCaCGaGAGG       | - | 5 | 2 | 0 | 6.06 | 3.03 |
| Chr7:95664010-95664032    | 2 | RNA | GGCCGAGGTCGACTACCGGNNRG    | GGTCGGGgaCGAgT-CGCGCGG      | + | 4 | 2 | 0 | 6.06 | 3.03 |
| Chr8:78627447-78627469    | 5 | RNA | GGCCGAGGTCGACTACCGGNNRG    | G-CaAGGTCGAGTCTCGGCaAG      | + | 5 | 2 | 0 | 6.06 | 3.03 |
| Chr1:271077305-271077327  | 2 | RNA | GGCCGAGGTCGACTACCGGNNRG    | GTCGAGGTCG-TGtGgAGCaAG      | - | 5 | 2 | 0 | 6.06 | 3.03 |
| Chr8:163063070-163063092  | 4 | RNA | GGCCGAGGTCGACTA-CCGCGNNRG  | GGCCGAGGCa-CACTcHgTgGCTGG   | + | 5 | 1 | 0 | 6.06 | 3.03 |
| Chr1:230928743-230928765  | 4 | RNA | GGCCGAGGTCGACTACCGGNNRG    | caCCAGTtGcCT-CCGCGCAG       | + | 5 | 1 | 0 | 6.06 | 3.03 |
| Chr1:162962298-162962320  | 3 | RNA | GGCCGAGGTCGACTACCGGNNRG    | GGCCAtcTgGACTA-GRTTGG       | - | 5 | 2 | 0 | 6.06 | 3.03 |
| Chr8:130470592-130470614  | 4 | RNA | GGCCGAGGTCGACTACCGGNNRG    | G-aCGGGTCGACaACgagCGCGG     | + | 5 | 1 | 0 | 6.06 | 3.03 |
| Chr5:141155973-141155995  | 5 | RNA | GGCCGAGGTCGACTACCGGNNRG    | GaCCAGGTCAGtCaACCGC-CCAG    | + | 5 | 1 | 0 | 6.06 | 3.03 |
| Chr4:155949350-155949372  | 2 | RNA | GGCCGAGGTCGACTACCGGNNRG    | GGCCaHTGTCGACaA-tGCAAG      | - | 4 | 2 | 0 | 6.06 | 3.03 |
| Chr5:15533161-15533183    | 2 | RNA | GGCCGAGGTCGACTACCGGNNRG    | GGH-AGAGTCGAgTtHcGGCTGG     | + | 5 | 1 | 0 | 6.06 | 3.03 |
| Chr1:2687746054-268746076 | 2 | RNA | GGCCGAGGTCGACTACCGGNNRG    | GTCCG-GTgTcACaCCGAGCaAG     | + | 5 | 2 | 0 | 6.06 | 3.03 |
| Chr5:106271711-106271733  | 4 | RNA | GGCCGAGGTCGACTACCGGNNRG    | tGaaAGGCG-ATACTCTGCGGG      | - | 5 | 2 | 0 | 6.06 | 3.03 |
| Chr3:234323595-234323599  | 2 | RNA | GGCCGAGGTCGACTACCGGNNRG    | GGCCGCGGAGGTCGAGCaCGGCGG    | + | 5 | 1 | 0 | 6.06 | 3.03 |
| Chr4:49010447-49010469    | 4 | RNA | GGCCGAGGTCGACTACCGGNNRG    | G-CGAGGTCGcCgtTgGCGAG       | + | 5 | 2 | 0 | 6.06 | 3.03 |
| Chr10:29619551-29619573   | 5 | RNA | GGCCGAGGTCGACTACCGGNNRG    | GG-GcaCTCTGggACCGCGCAG      | + | 5 | 2 | 0 | 6.06 | 3.03 |
| Chr2:211952508-211952530  | 4 | RNA | GGCCGAGGTCGACTACCGGNNRG    | G-aCGGGTCGAGCaCGagCGGG      | + | 5 | 1 | 0 | 6.06 | 3.03 |
| Chr8:39542492-39542514    | 2 | RNA | GGCCGAGGTCGACTACCGGNNRG    | GTgGAGGTCGGA-gACCGaCCGG     | - | 5 | 1 | 0 | 6.06 | 3.03 |
| Chr10:6663614-6663636     | 3 | DNA | GGC-CGAGGTCGACTACCGGNNRG   | GCTCGGtGAGtGCTtCCGCTGG      | + | 5 | 1 | 0 | 6.06 | 3.03 |
| Chr6:81702532-81702554    | 2 | RNA | GGCCGAGGTCGACTACCGGNNRG    | GTCCGAA-aAGaTACCGGaAAG      | - | 5 | 2 | 0 | 6.06 | 3.03 |
| Chr4:40538516-40538538    | 4 | DNA | GGCCGAGGTCGACTA-CCGCGNNRG  | GcCCAGCaATCGcTACCGCGGtCCAG  | + | 5 | 2 | 0 | 6.06 | 3.03 |
| Chr6:83379081-83379103    | 5 | RNA | GGCCGAGGTCGACTACCGGNNRG    | G-aCtAGGgGcGACaCCGCGCGG     | - | 5 | 1 | 6 | 0.00 | 3.00 |
| Chr9:143900795-143900817  | 3 | RNA | GGCCGAGGTCGACTACCGGNNRG    | GtCCAGGCGGCa-ACtHgTgTG      | + | 5 | 2 | 0 | 6.06 | 3.03 |
| Chr2:62452759-62452781    | 3 | RNA | GGCCGAGGTCGACTACCGGNNRG    | GaaHcGAGGTCGAGtGtTACcCGGG   | + | 5 | 2 | 0 | 6.06 | 3.03 |
| Chr2:129824175-129824197  | 3 | RNA | GGCCGAGGTCGACTACCGGNNRG    | GtCCGAGGTCGGA-ACtGgCGGG     | + | 5 | 2 | 6 | 0.00 | 3.00 |
| Chr2:183812566-183812588  | 5 | DNA | GGCCGAGGTCGA-CTACCGGNNRG   | GcCCAGGggaGAGCaACCGaCCGG    | + | 5 | 1 | 6 | 0.00 | 3.00 |
| Chr4:44956370-44956392    | 3 | RNA | GGCCGAGGTCGACTACCGGNNRG    | tGc-AGTgTcAGcCgtCCGCaAG     | + | 5 | 2 | 6 | 0.00 | 3.00 |
| Chr4:201718685-201718707  | 3 | RNA | GGCCGAGGTCGACTACCGGNNRG    | GtCGAGGTCG-CgtCCGtGAG       | + | 5 | 1 | 6 | 0.00 | 3.00 |
| Chr3:13342931-13342953    | 3 | RNA | GGCCGAGGTCGACTACCGGNNRG    | GGC-AGGcCGCaAGACcCGCGGG     | + | 4 | 2 | 6 | 0.00 | 3.00 |
| Chr1:267072992-267073014  | 5 | DNA | GGC-CGAGGTCGACTACCGGNNRG   | GGCTCTGgGgGtACaCCGCGCGGG    | - | 5 | 2 | 6 | 0.00 | 3.00 |
| Chr2:117524235-117524257  | 3 | RNA | GGCCGAGGTCGACTACCGGNNRG    | cCGC-AcaacGACTACGtCCCGG     | + | 5 | 2 | 6 | 0.00 | 3.00 |
| Chr5:138036569-138036591  | 3 | RNA | GGCCGAGGTCGACTACCGGNNRG    | GGC-AGGcCaACaCCGCGCGGG      | + | 3 | 2 | 6 | 0.00 | 3.00 |
| Chr9:17768554-17768576    | 3 | RNA | GGCCGAGGTCGACTACCGGNNRG    | GGC-AGGcCGggACtGCaCCGG      | + | 5 | 2 | 6 | 0.00 | 3.00 |
| Chr2:20801575-20801597    | 5 | DNA | GGCCGAGGTCGACTACCGGNNRG    | GaaCGAGGTCGACTACCGGNNRG     | - | 5 | 2 | 6 | 0.00 | 3.00 |
| Chr5:15962937-15962959    | 3 | RNA | G-GCCGAGGTCGACTACCGGNNRG   | GaGCGCGAGGCGCaAGgtcGGGCGAG  | + | 5 | 2 | 6 | 0.00 | 3.00 |
| Chr5:24489734-24489756    | 3 | RNA | GGCCGAGGTCGACTACCGGNNRG    | GTCCGAGGCa-CTAaCTGCGAG      | + | 4 | 2 | 6 | 0.00 | 3.00 |
| Chr4:927905-927927        | 3 | RNA | GGCCGAGGTCGACTACCGGNNRG    | GGCCGcGc-GACCaACtGaAAG      | + | 5 | 1 | 6 | 0.00 | 3.00 |
| Chr5:18605364-18605386    | 3 | RNA | GGCCGAGGTCGACTACCGGNNRG    | GGCCAGtAGTcG-TtgCGCaAGG     | + | 5 | 2 | 6 | 0.00 | 3.00 |
| Chr6:100600754-100600776  | 5 | RNA | GGCCGAGGTCGACTACCGGNNRG    | GaCGAGGTCtctGa-aaCGG        | + | 5 | 2 | 6 | 0.00 | 3.00 |
| Chr3:179281155-179281177  | 3 | RNA | GGCCGAGGTCGACTACCGGNNRG    | GGCCAGGAGTgGtGCTC-CCAG      | - | 3 | 2 | 6 | 0.00 | 3.00 |
| Chr1:89413185-89413207    | 3 | RNA | GGCCGAGGTCGACTACCGGNNRG    | aGCCAGGcGc-ActcTgGGCaGG     | + | 5 | 1 | 6 | 0.00 | 3.00 |
| Chr8:37497992-37498014    | 3 | RNA | GGCCGAGGTCGACTACCGGNNRG    | GgGcCGAGGCGGA-gaHTGCaAGG    | + | 5 | 1 | 6 | 0.00 | 3.00 |
| Chr8:83380376-83380398    | 3 | RNA | GGCCGAGGTCGACTACCGGNNRG    | GGCCG-GGTGAGaAgcAtCAAG      | + | 5 | 1 | 6 | 0.00 | 3.00 |
| Chr4:85007047-85007069    | 5 | DNA | GGCCGAGGTCG-ATACTACCGGNNRG | GcCCAGGTCGCTTgTACcCGGG      | + | 5 | 2 | 6 | 0.00 | 3.00 |
| Chr4:91487901-91487923    | 3 | RNA | GGCCGAGGTCGACTACCGGNNRG    | GGCCGAGcTtGCTTCT-GcCCAG     | + | 5 | 1 | 6 | 0.00 | 3.00 |
| Chr8:134314717-134314739  | 3 | DNA | GGCCGAGGTCGACTACCG-CNNRG   | GGCCGAGGTCGcCTragSCtCGGG    | - | 5 | 1 | 6 | 0.00 | 3.00 |
| Chr1:17752534-17752556    | 5 | DNA | GGCCGAGGTCGACTACCGGNNRG    | GaCtCaAGTCACTgTcCGGaTGG     | + | 5 | 1 | 6 | 0.00 | 3.00 |
| Chr1:248317774-248317796  | 5 | RNA | GGCCGAGGTCGACTACCGGNNRG    | GtHtGAG-CaACTAaGtCGAG       | - | 5 | 2 | 6 | 0.00 | 3.00 |
| Chr2:33213866-33213888    | 3 | RNA | GGCCGAGGTCGACTACCGGNNRG    | GCGCaAGTcGAGg-CGGCCAG       | + | 5 | 2 | 6 | 0.00 | 3.00 |
| Chr8:75568215-75568237    | 3 | RNA | GGCCGAGGTCGACTACCGGNNRG    | GagCGAG-TGtGtCAACGtCCAG     | + | 5 | 1 | 6 | 0.00 | 3.00 |
| Chr8:58903585-58903607    | 5 | X   | GGCCGAGGTCGACTACCGGNNRG    | GGCCCaAGcCG                 |   |   |   |   |      |      |

|                           |           |   |     |                            |                             |   |   |   |   |      |      |
|---------------------------|-----------|---|-----|----------------------------|-----------------------------|---|---|---|---|------|------|
| Chr1:67539943-67539965    | 67539950  | 5 | RNA | GGCCGAGGTCGACTACCGGNNRG    | GcCCGAGcCtGAgT-CGGIAGG      | - | 5 | 2 | 6 | 0.00 | 3.00 |
| Chr5:216890104-216890126  | 216890121 | 3 | RNA | GGCCGAGGTCGACTACCGGNNRG    | GG-GAGgTGCATCActcCAAG       | + | 4 | 2 | 6 | 0.00 | 3.00 |
| Chr4:65705658-65705680    | 65705675  | 3 | RNA | GGCCGAGGTCGACTACCGGNNRG    | GGcCGAGGT-GctTCAcGagAGG     | + | 5 | 1 | 6 | 0.00 | 3.00 |
| Chr8:95257752-95257774    | 95257769  | 3 | RNA | GGCCGAGGTCGACTACCGGNNRG    | GaCCGAGG-CGAGcAcaagAGG      | + | 5 | 1 | 6 | 0.00 | 3.00 |
| Chr6:159611040-159611062  | 159611057 | 3 | RNA | GGCCGAGGTCGACTACCGGNNRG    | cCtCGAGGTC-CTcCaagTAG       | + | 5 | 2 | 6 | 0.00 | 3.00 |
| Chr7:106612436-106612443  | 106612443 | 5 | RNA | GGCCGAGGTCGACTACCGGNNRG    | GGC-CGAGTCGagAGcCGGG        | - | 5 | 1 | 6 | 0.00 | 3.00 |
| Chr2:131651307-131651329  | 131651314 | 5 | RNA | GGCCGAGGTCGACTACCGGNNRG    | GgGcCGAG-CtCGcAGGCGGG       | - | 5 | 2 | 6 | 0.00 | 3.00 |
| Chr2:63726311-63726333    | 63726318  | 5 | RNA | GGCCGAGGTCGACTACCGGNNRG    | gGCCAGTGTGACTACC-HCG        | - | 4 | 2 | 6 | 0.00 | 3.00 |
| Chr3:132856517-132856539  | 132856534 | 3 | DNA | GGC-GCAGGTGCAGTACCgGNNRG   | GGCTGTGAGGTCAcCgCGGcCG      | + | 4 | 2 | 6 | 0.00 | 3.00 |
| Chr5:211208289-211208311  | 211208296 | 5 | RNA | GGCCGAGGTCGACTACCGGNNRG    | GcCCAGcGT-CtCcaagTGG        | - | 5 | 2 | 6 | 0.00 | 3.00 |
| Chr5:99721071-99721093    | 99721078  | 5 | RNA | GGCCGAGGTCGACTACCGGNNRG    | GgGcGgG-CGACcACacCGGG       | - | 5 | 1 | 6 | 0.00 | 3.00 |
| Chr2:191038543-191038565  | 191038550 | 5 | RNA | GGCCGAGGTCGACTACCGGNNRG    | cCGCCGCTGCAC-CtGgTAT        | - | 5 | 2 | 6 | 0.00 | 3.00 |
| Chr9:20794407-20794429    | 20794414  | 5 | RNA | GGCCGAGGTCGACTACCGGNNRG    | G-CtGcGgCGAGTACGGCAGG       | - | 5 | 1 | 6 | 0.00 | 3.00 |
| Chr3:12643969-12643991    | 12643976  | 5 | DNA | GGCCGAGGTCGACTACCGGNNRG    | GgaCGagGTGCTCTACCGGgTGG     | - | 5 | 1 | 6 | 0.00 | 3.00 |
| Chr1:146155367-146155389  | 146155384 | 3 | RNA | GGCCGAGGTCGACTACCGGNNRG    | G-CtGcGgCGAGTACGGCAGG       | + | 5 | 1 | 6 | 0.00 | 3.00 |
| Chr2:72470284-72470306    | 72470301  | 3 | DNA | GGCCGA--GTCGACTACCGGNNRG   | GgGgAGCCGagGCAcGacCGGcAAG   | + | 5 | 2 | 6 | 0.00 | 3.00 |
| Chr1:19034628-19034650    | 19034625  | 3 | RNA | GGCCGAGGTCGACTACCGGNNRG    | GgGcCAAGCTCG--TcCcaagTGG    | + | 5 | 2 | 6 | 0.00 | 3.00 |
| Chr3:70899041-70899063    | 70899048  | 5 | RNA | GGCCGAGGTCGACTACCGGNNRG    | GaCCGAGGcAGTCTACCG-CGGG     | - | 4 | 1 | 6 | 0.00 | 3.00 |
| Chr9:77411136-77411158    | 77411143  | 5 | RNA | GGCCGAGGTCGACTACCGGNNRG    | G-CCGAGGTtGgcctGgGcCAG      | - | 5 | 1 | 6 | 0.00 | 3.00 |
| Chr1:108825688-108825710  | 108825705 | 3 | RNA | GGCCGAGGTCGACTACCGGNNRG    | G-CCGAGTAAcAcACtCGCTGG      | + | 5 | 1 | 6 | 0.00 | 3.00 |
| Chr2:225361920-225361942  | 225361927 | 5 | RNA | GGCCGAGGTCGACTACCGGNNRG    | actGcCGGTCGACT-CCGCGCGG     | - | 5 | 1 | 6 | 0.00 | 3.00 |
| Chr5:71895882-71895904    | 71895889  | 5 | RNA | GGCCGAGGTCGACTACCGGNNRG    | GGCCGAAGTcGgcAACC-ITGG      | - | 4 | 2 | 6 | 0.00 | 3.00 |
| Chr10:9366644-9366666     | 93666651  | 5 | RNA | GGCCGAGGTCGACTACCGGNNRG    | GctCGaAgcC-CTAACGGCAGG      | - | 5 | 2 | 6 | 0.00 | 3.00 |
| Chr3:34385661-34385683    | 34385678  | 3 | RNA | GGCCGAGGTCGACTACCGGNNRG    | G-CGAGCTCTAGcCGGCCGG        | + | 5 | 2 | 6 | 0.00 | 3.00 |
| Chr6:13142918-13142940    | 13142935  | 3 | RNA | GGCCGAGGTCGACTACCGGNNRG    | atCTCGgGT-GACCAcCGCGGG      | + | 5 | 1 | 6 | 0.00 | 3.00 |
| Chr4:14164652-14164674    | 14164669  | 3 | RNA | GGCCGAGGTCGACTACCGGNNRG    | G-CGAGGTGCAGcAGcGGCGG       | + | 5 | 1 | 6 | 0.00 | 3.00 |
| Chr1:132746271-132746293  | 132746298 | 3 | RNA | GGCCGAGGTCGACTACCGGNNRG    | GgaCGtGTGCAGcGCG-CGGG       | + | 5 | 1 | 6 | 0.00 | 3.00 |
| Chr3:59560648-59560670    | 59560665  | 3 | RNA | GGCCGAGGTCGACTACCGGNNRG    | GgaCGtCTGCAGT-CCGtGTGG      | + | 5 | 1 | 6 | 0.00 | 3.00 |
| Chr9:118995348-118995370  | 118995365 | 3 | DNA | GGCCGAGGTCGACTACCGGNNRG    | GGCCGAGGTcGACcAGcGGCCGG     | + | 5 | 1 | 6 | 0.00 | 3.00 |
| Chr1:35071769-35071791    | 35071776  | 5 | X   | GGCCGAGGTCGACTACCGGNNRG    | GgCGcHGtGTGgGAgAGCGCGGG     | - | 5 | 0 | 6 | 0.00 | 3.00 |
| Chr10:99023149-99023171   | 99023156  | 5 | RNA | GGCCGAGGTCGACTACCGGNNRG    | GGC-tcGcAGTACCTCGGCTGG      | - | 4 | 2 | 6 | 0.00 | 3.00 |
| Chr6:43494395-43494417    | 43494402  | 5 | DNA | GGCCGAGGTCGACTACCGGNNRG    | GgGcCGGTCGACTACCGGgATAG     | - | 5 | 1 | 6 | 0.00 | 3.00 |
| Chr5:18520067-18520089    | 18520084  | 3 | RNA | GGCCGAGGTCGACTACCGGNNRG    | cCGcACtGTGACTTGC--CCGG      | + | 5 | 2 | 6 | 0.00 | 3.00 |
| Chr10:142691979-142692001 | 142691986 | 3 | DNA | GGC-CGAGGTGCAGTACCgGNNRG   | GGCTCTGgGgGtCAcAcCGGCGGG    | - | 5 | 2 | 6 | 0.00 | 3.00 |
| Chr4:225409632-225409654  | 225409649 | 3 | RNA | GGCCGAGGTCGACTACCGGNNRG    | GGCCGAGtCG-CGACCaGaTAG      | + | 5 | 1 | 6 | 0.00 | 3.00 |
| Chr1:123925346-123925368  | 123925353 | 3 | RNA | GGCCGAGGTCGACTACCGGNNRG    | GGCCAGTCTGctTA--GGCGGG      | - | 5 | 1 | 6 | 0.00 | 3.00 |
| Chr2:124766213-124766235  | 124766230 | 3 | DNA | GGC-CGAGGTGCAGTACCgGNNRG   | GGCGGGCGtGGTcGAcCgGcGgGCAAG | + | 5 | 2 | 6 | 0.00 | 3.00 |
| Chr5:178180723-178180745  | 178180740 | 3 | RNA | GGCCGAGGTCGACTACCGGNNRG    | t-CGgGgaGHTCTGGCTGG         | + | 5 | 2 | 6 | 0.00 | 3.00 |
| Chr8:106889847-106889869  | 106889864 | 3 | RNA | GGCCGAGGTCGACTACCGGNNRG    | G-aCGCGTGCAGCAaGgaCGGG      | + | 5 | 1 | 6 | 0.00 | 3.00 |
| Chr7:46237825-46237847    | 46237842  | 3 | RNA | GGCCGAGGTCGACTACCGGNNRG    | GG--GAGTCTCAcTaaGCGAGG      | + | 5 | 2 | 6 | 0.00 | 3.00 |
| Chr2:157494426-157494448  | 157494433 | 5 | RNA | GGCCGAGGTCGACTACCGGNNRG    | GgGcGAHgaCGAGcAG--GaAG      | - | 5 | 2 | 6 | 0.00 | 3.00 |
| Chr9:14443523-14443545    | 14443540  | 3 | DNA | GGCCGAGGTCGACTACCGGNNRG    | GtTCGAGATGTGATTAagGCGCGAG   | - | 4 | 2 | 6 | 0.00 | 3.00 |
| Chr8:9467677-9467699      | 94676784  | 5 | RNA | GGCCGAGGTCGACTACCGGNNRG    | GGC-tcGagGACTACCGTCTGG      | - | 4 | 2 | 6 | 0.00 | 3.00 |
| Chr2:118140559-118140581  | 118140566 | 3 | RNA | GGCCGAGGTCGACTACCGGNNRG    | cCGCAaAGaGACTTgC--GGCGG     | - | 5 | 2 | 6 | 0.00 | 3.00 |
| Chr9:8176195-8176217      | 8176212   | 3 | RNA | GGCCGAGGTCGACTACCGGNNRG    | GgGcTcGGcCAcTcCGCGCGG       | + | 5 | 1 | 6 | 0.00 | 3.00 |
| Chr4:155102967-155102989  | 155102984 | 3 | RNA | GGCCGAGGTCGACTACCGGNNRG    | ttCGCCAGTCTGATTt--GGCAGG    | - | 5 | 2 | 6 | 0.00 | 3.00 |
| Chr2:40746979-40747001    | 40746986  | 5 | RNA | GGCCGAGGTCGACTACCGGNNRG    | tcCGCCAGGcCGA--ACtGcGTGG    | - | 5 | 2 | 6 | 0.00 | 3.00 |
| Chr5:38850092-38850114    | 38850099  | 5 | RNA | GGCCGAGGTCGACTACCGGNNRG    | tG--GAGGTHcCAcACCGgATAG     | - | 5 | 2 | 6 | 0.00 | 3.00 |
| Chr2:199881248-199881270  | 199881255 | 5 | RNA | GGCCGAGGTCGACTACCGGNNRG    | t-CGgGgaGCTCTCGGCTGG        | - | 5 | 2 | 6 | 0.00 | 3.00 |
| Chr9:52723075-52723097    | 52723092  | 3 | RNA | GGCCGAGGTCGACTACCGGNNRG    | GGcAGG--CGATTAgaagCTAG      | + | 5 | 2 | 6 | 0.00 | 3.00 |
| Chr6:135676726-135676748  | 135676743 | 3 | RNA | GGCCGAGGTCGACTACCGGNNRG    | aaCCAGcTCG--GaAGCGCGG       | + | 5 | 2 | 6 | 0.00 | 3.00 |
| Chr2:149630337-149630359  | 149630354 | 3 | RNA | GGCCGAGGTCGACTACCGGNNRG    | GgGc-AGGcCAcCtCCGGCCGG      | + | 5 | 1 | 6 | 0.00 | 3.00 |
| Chr8:120335079-120335101  | 120335086 | 5 | RNA | GGCCGAGGTCGACTACCGGNNRG    | GGC-HtGgGACTACCGCTGG        | - | 4 | 2 | 6 | 0.00 | 3.00 |
| Chr5:8878585-88785307     | 88785302  | 3 | RNA | GGCCGAGGTCGACTACCGGNNRG    | GgaCAAGTGCAGTAA--aGtCAG     | + | 5 | 2 | 6 | 0.00 | 3.00 |
| Chr5:211083589-211083611  | 211083606 | 3 | RNA | GGCCGAGGTCGACTACCGGNNRG    | GcGgAGGcCGAC-CGtCAAG        | + | 5 | 2 | 6 | 0.00 | 3.00 |
| Chr8:60853116-60853138    | 60853133  | 3 | RNA | GGCCGAGGTCGACTACCGGNNRG    | GGC-HtCGGAGTCACTACCGG       | - | 5 | 2 | 6 | 0.00 | 3.00 |
| Chr4:38855777-38855799    | 38855794  | 3 | RNA | GGCCGAGGTCGACTACCGGNNRG    | GGC--AGGcCGAGcACCGCGGG      | - | 3 | 2 | 6 | 0.00 | 3.00 |
| Chr2:103752146-103752168  | 103752163 | 3 | DNA | GGCCGAGGTCGACTACC--GGCNNRG | GGCCCGGTaGACTAAcTctGaCGG    | + | 5 | 2 | 6 | 0.00 | 3.00 |
| Chr4:22135726-22135748    | 22135743  | 3 | RNA | GGCCGAGGTCGACTACCGGNNRG    | cCtCGAGTcGcCT-CCGcCGG       | - | 5 | 1 | 6 | 0.00 | 3.00 |
| Chr1:281412146-281412168  | 281412153 | 5 | DNA | GGC-GCAGGTGCAGTACCgGNNRG   | GGCTCTGgGgGtCAcCcgCGCGGG    | - | 5 | 2 | 6 | 0.00 | 3.00 |
| Chr9:55197101-55197123    | 55197108  | 5 | RNA | GGCCGAGGTCGACTACCGGNNRG    | GGC-CAcTCTGcCTCTGCTGG       | - | 5 | 1 | 6 | 0.00 | 3.00 |
| Chr2:119960514-119960536  | 119960531 | 3 | DNA | G-CGCCGAGGTCGACTACCGGNNRG  | GAGTCAGaCaCgGcACCGGCGGG     | + | 5 | 1 | 6 | 0.00 | 3.00 |
| Chr10:76266404-76266426   | 76266411  | 5 | RNA | GGCCGAGGTCGACTACCGGNNRG    | GcCGAGGctcCGA--CGtCAAG      | - | 5 | 2 | 6 | 0.00 | 3.00 |
| Chr4:69757015-69757037    | 69757022  | 3 | RNA | GGCCGAGGTCGACTACCGGNNRG    | G-aCGAGTcCGACaAGaGCGGG      | - | 4 | 1 | 6 | 0.00 | 3.00 |
| Chr2:29891318-29891340    | 29891325  | 5 | RNA | GGCCGAGGTCGACTACCGGNNRG    | GG-GAGCTCTCAcTCTCGGAGAG     | - | 4 | 2 | 6 | 0.00 | 3.00 |
| Chr8:38341080-38341102    | 38341087  | 5 | DNA | GGCCGAGGTCGACTACCGGNNRG    | GtCGCGAGGTCGACTACCGG        | - | 5 | 1 | 6 | 0.00 | 3.00 |
| Chr3:23193788-23193810    | 23193795  | 5 | RNA | GGCCGAGGTCGACTACCGGNNRG    | G-HCGcCTCGAGcACCGCGGG       | - | 5 | 1 | 6 | 0.00 | 3.00 |
| Chr2:116690125-116690147  | 116690132 | 5 | RNA | GGCCGAGGTCGACTACCGGNNRG    | GGC-HtCGTCTGAggACHGGCGGG    | - | 5 | 1 | 6 | 0.00 | 3.00 |
| Chr2:5869429-5869451      | 5869436   | 5 | RNA | GGCCGAGGTCGACTACCGGNNRG    | GGCCGAGGgGtCAaGAtCGGG       | - | 5 | 1 | 6 | 0.00 | 3.00 |
| Chr6:97775764-97775786    | 97775781  | 3 | RNA | GGCCGAGGTCGACTACCGGNNRG    | aGGCCAGcTC--CTtCGgAGG       | + | 5 | 2 | 6 | 0.00 | 3.00 |
| Chr9:61102069-61102091    | 61102076  | 5 | RNA | GGCCGAGGTCGACTACCGGNNRG    | tG--GAGgAgGcAGCtCGCTGG      | - | 5 | 2 | 6 | 0.00 | 3.00 |
| Chr1:276604348-276604370  | 276604355 | 5 | RNA | GGCCGAGGTCGACTACCGGNNRG    | GaaGAGGTCT-AtgACCGGCAAG     | - | 5 | 1 | 6 | 0.00 | 3.00 |
| Chr5:65822139-65822161    | 65822146  | 5 | RNA | GGCCGAGGTCGACTACCGGNNRG    | GGC-tcGgGACTACCGTCTGG       | - | 5 | 2 | 6 | 0.00 | 3.00 |
| Chr10:50542966-50542988   | 50542983  | 3 | RNA | GGCCGAGGTCGACTACCGGNNRG    | GGC--AGGcCGAGcACaGCGGG      | + | 5 | 2 | 6 | 0.00 | 3.00 |
| Chr7:1563558-1563580      | 1563565   | 5 | RNA | GGCCGAGGTCGACTACCGGNNRG    | aGCCAGGAGaGAGCAc-GtCCAG     | - | 5 | 1 | 6 | 0.00 | 3.00 |
| Chr5:218328654-218328686  | 218328671 | 5 | RNA | GGCCGAGGTCGACTACCGGNNRG    | GtCG-AGGcGAGTCTCAcAGAG      | - | 5 | 1 | 6 | 0.00 | 3.00 |
| Chr3:210170747-210170769  | 210170764 | 3 | RNA | GGCCGAGGTCGACTACCGGNNRG    | GGC-cCGcGtTgC--TtCGAGGG     | + | 5 | 2 | 6 | 0.00 | 3.00 |
| Chr9:65079073-65079095    | 65079090  | 3 | RNA | GGCCGAGGTCGACTACCGGNNRG    | GGC--AGGcCAcCTcCGGCCGG      | + | 4 | 2 | 6 | 0.00 | 3.00 |
| Chr6:72911352-72911374    | 72911368  | 4 | RNA | GGCCGAGGTCGACTACCGGNNRG    | G-aCGGtGTGCAGCAaGgaCGGG     | + | 5 | 1 | 1 | 4.96 | 2.98 |
| Chr3:62192763-62192785    | 62192779  | 4 | RNA | GGCCGAGGTCGACTACCGGNNRG    | cCGCCAGtctCAaTACC--CTAG     | + | 5 | 2 | 1 | 4.96 | 2.98 |
| Chr2:33514086-33514108    | 33514092  | 4 | RNA | GGCCGAGGTCGACTACCGGNNRG    | GGC--AGGctACcctCGGCGAG      | - | 5 | 2 | 2 | 3.86 | 2.93 |
| Chr4:191426183-191426205  | 191426189 | 4 | RNA | GGCCGAGGTCGACTACCGGNNRG    | caCAAGTCTGcCT-CCGCGCAG      | - | 5 | 1 | 2 | 3.86 | 2.93 |
| Chr5:82350877-82350899    | 82350882  | 3 | RNA | GGCCGAGGTCGACTACCGGNNRG    | G-HCGAGGcCAcTACGcAGG        | - | 4 | 1 | 2 | 3.86 | 2.93 |
| Chr1:73313951-73313973    | 73313957  | 5 | RNA | GGCCGAGGTCGACTACCGGNNRG    | GGC-GAGGTCTGACgGgagATGG     | - | 5 | 1 | 3 | 2.75 | 2.88 |
| Chr10:60613212-60613234   | 60613219  | 5 | RNA | GGCCGAGGTCGACTACCGGNNRG    | GtCGcAGcTCTCAcT-CCGCGCAG    | - | 4 | 1 | 4 | 1.65 | 2.83 |
| Chr10:103180982-103180984 | 103180981 | 2 | RNA | GGCCGAGGTCGACTACCGGNNRG    | GG--CGcGAGGAGaGtACtAGG      | - | 5 | 1 | 6 | 0.00 | 3.00 |
| Chr3:12360771-12360793    | 12360778  | 3 | RNA | GGCCGAGGTCGACTACCGGNNRG    | atCCGAGtGTGA--CGgGCGAG      | - | 5 | 2 | 5 | 0.55 | 2.78 |
| Chr3:27939723-27939745    | 27939728  | 3 | DNA | GGCCGAGGTCGACTACCGGNNRG    | cGAAGAGTCTGAGCACCgGtCGG     | - | 4 | 1 | 0 | 0.51 | 2.76 |
| Chr4:32708440-32708462    | 32708458  | 2 | RNA | GGCCGAGGTCGACTACCGGNNRG    | cGgCGAGGaGCa--ACAagGgGAG    | + | 5 | 2 | 0 | 0.51 | 2.76 |
| Chr10:24810560-24810582   | 24810577  | 3 | RNA | GGCCGAGGTCGACTACCGGNNRG    | GG--GcGGTCAaCTgTcGAAGG      | + | 5 | 2 | 0 | 0.51 | 2.76 |
| Chr2:161671483-161671505  | 161671500 | 3 | RNA | GGCCGAGGTCGACTACCGGNNRG    | GGCGGAGGT agGCAaTa--CTGG    | + | 5 | 2 | 0 | 0.51 | 2.76 |
| Chr8:131056168-131056190  | 131056184 | 4 | RNA | GGCCGAGGTCGACTACCGGNNRG    | GGC--tcGgGACTACCGCTGG       | + | 5 | 4 | 2 | 0.51 | 2.76 |
| Chr5:39204058-39204080    | 39204074  | 3 | RNA | GGCCGAGGTCGACTACCGGNNRG    |                             |   |   |   |   |      |      |

|                           |           |   |     |                            |                            |   |   |   |   |      |      |
|---------------------------|-----------|---|-----|----------------------------|----------------------------|---|---|---|---|------|------|
| Chr5:76511711-76511733    | 76511729  | 2 | RNA | GGCCGAGGTCGACTACCGGNNRG    | GaCCGAGG-CGACgAcaGAGG      | + | 5 | 1 | 0 | 5.51 | 2.76 |
| Chr8:65327322-65327344    | 65327326  | 2 | RNA | GGCCGAGGTCGACTACCGGNNRG    | cGCCAGCTCGAaTcCCG-aGAG     | - | 5 | 1 | 0 | 5.51 | 2.76 |
| Chr10:64853316-64853338   | 64853334  | 2 | RNA | GGCCGAGGTCGACTACCGGNNRG    | GgCGAGCgagGACT-CGcCAAG     | + | 5 | 2 | 0 | 5.51 | 2.76 |
| Chr4:50998463-50998485    | 50998467  | 2 | RNA | GGCCGAGGTCGACTACCGGNNRG    | GagaGgGTGCTCGCT-CGGCCGG    | - | 5 | 2 | 0 | 5.51 | 2.76 |
| Chr5:138899230-138899252  | 138899246 | 4 | RNA | GGCCGAGGTCGACTACCGGNNRG    | ttCCGAGTTCGATTA-HGcCAGG    | + | 5 | 2 | 0 | 5.51 | 2.76 |
| Chr2:18893037-18893039    | 18893037  | 2 | RNA | GGCCGAGGTCGACTACCGGNNRG    | GgCCGAGGTCGACTACCGGNNRG    | - | 5 | 2 | 0 | 5.51 | 2.76 |
| Chr4:45282082-45282104    | 45282098  | 4 | RNA | GGCCGAGGTCGACTACCGGNNRG    | G-aCGGTCGTGCACaCgAGCGGG    | + | 5 | 1 | 0 | 5.51 | 2.76 |
| Chr7:10962590-10962612    | 10962597  | 5 | RNA | GGCCGAGGTCGACTACCGGNNRG    | GGaCGAGGTCGACTACCGGNNRG    | - | 5 | 1 | 0 | 5.51 | 2.76 |
| Chr4:204318800-204318822  | 204318804 | 2 | RNA | GGCCGAGGTCGACTACCGGNNRG    | G-CGIGTCGATgACtAGcAGG      | - | 5 | 2 | 0 | 5.51 | 2.76 |
| Chr4:20023417-20023439    | 20023435  | 2 | RNA | GGCCGAGGTCGACTACCGGNNRG    | GGCCAGGTCGAGg-CGtGGG       | + | 5 | 2 | 0 | 5.51 | 2.76 |
| Chr3:152334774-152334796  | 152334780 | 4 | RNA | GGCCGAGGTCGACTACCGGNNRG    | GGC-AGGcCGAGcActaCGCGG     | - | 5 | 2 | 0 | 5.51 | 2.76 |
| Chr1:111975106-111975128  | 111975111 | 3 | DNA | GGC-CGAGGTGCAGTACCgGCGNNRG | GaCAACGgGTGTGCAGcAgaCGCGGG | - | 5 | 2 | 0 | 5.51 | 2.76 |
| Chr4:173332208-173332230  | 173332226 | 2 | RNA | GGCCGAGGTCGACTACCGGNNRG    | GGCGAGGTCGAGg-CGGIGGG      | + | 5 | 2 | 0 | 5.51 | 2.76 |
| Chr2:194479906-194479928  | 194479910 | 2 | RNA | GGCCGAGGTCGACTACCGGNNRG    | tGtaGAGT-GaATACCGGCTGG     | - | 5 | 1 | 0 | 5.51 | 2.76 |
| Chr5:57230321-57230343    | 57230339  | 2 | RNA | GGCCGAGGTCGACTACCGGNNRG    | GGCCGcGcGCTT-CtGCTGG       | + | 5 | 2 | 0 | 5.51 | 2.76 |
| Chr5:112241586-112241608  | 112241602 | 4 | RNA | GGCCGAGGTCGACTACCGGNNRG    | GGCCtGcGTGCAG-ggCGCGGG     | + | 4 | 1 | 0 | 5.51 | 2.76 |
| Chr2:122542398-122542420  | 122542405 | 5 | RNA | GGCCGAGGTCGACTACCGGNNRG    | GGCGaAcTCACT-CCGCGAG       | + | 5 | 1 | 0 | 5.51 | 2.76 |
| Chr8:75250363-75250385    | 75250369  | 4 | RNA | GGCCGAGGTCGACTACCGGNNRG    | GGCCGAGGTCGCTTg-GGCTGG     | - | 5 | 1 | 0 | 5.51 | 2.76 |
| Chr4:8562958-8562980      | 8562964   | 4 | DNA | GGCC-GAGGTGCAGTACCgGCGNNRG | aGCCGAGCT-CAGTACCgCAAG     | - | 4 | 1 | 0 | 5.51 | 2.76 |
| Chr5:145171136-145171158  | 145171151 | 5 | RNA | GGCCGAGGTCGACTACCGGNNRG    | G-CCGAGTAcAGTcCTCGCTGG     | + | 5 | 1 | 0 | 5.51 | 2.76 |
| Chr2:108353742-108353764  | 108353758 | 4 | RNA | GGCCGAGGTCGACTACCGGNNRG    | GaC-AGGTGCAGcAaCtGaAG      | + | 5 | 2 | 0 | 5.51 | 2.76 |
| Chr3:139324076-139324098  | 139324093 | 3 | RNA | GGCCGAGGTCGACTACCGGNNRG    | GcCGAGGcctGAC-CCGtCAAG     | + | 5 | 2 | 0 | 5.51 | 2.76 |
| Chr1:95966370-95966392    | 95966375  | 3 | DNA | GGCCGAGGTCGACTACCGGNNRG    | GGCCGAGGcCGAcAtgAGAGG      | - | 5 | 1 | 0 | 5.51 | 2.76 |
| Chr7:116767343-116767365  | 116767347 | 2 | RNA | GGCCGAGGTCGACTACCGGNNRG    | GGCCGgGGcCGAbggCTCGGGCGGG  | - | 5 | 1 | 0 | 5.51 | 2.76 |
| Chr8:102046492-102046514  | 102046510 | 2 | RNA | GGCCGAGGTCGACTACCGGNNRG    | GGCC-AGGTGTCcACtACCGCGGG   | + | 3 | 1 | 0 | 5.51 | 2.76 |
| Chr10:105155678-105155700 | 105155683 | 4 | RNA | GGCCGAGGTCGACTACCGGNNRG    | GcCGCGGagG-TACGCTGGG       | - | 4 | 1 | 0 | 5.51 | 2.76 |
| Chr4:85296426-85296448    | 85296441  | 5 | DNA | GGCC-GAGGTGCAGTACCgGCGNNRG | GaCTCGAGGTCGACTACCGGNNRG   | + | 5 | 2 | 0 | 5.51 | 2.76 |
| Chr7:96708004-96708026    | 96708020  | 4 | RNA | GGCCGAGGTCGACTACCGGNNRG    | GGaCAGGTCGAGgAGC-GGGCGG    | + | 4 | 1 | 0 | 5.51 | 2.76 |
| Chr8:106926614-106926636  | 106926631 | 3 | DNA | GGCC-GAGGTGCAGTACCgGCGNNRG | GGCCCCGgGcTGCAGcctCGCGAGG  | + | 5 | 1 | 0 | 5.51 | 2.76 |
| Chr8:22618385-22618407    | 22618389  | 2 | DNA | GGCCGAGGTCGACTACCGGNNRG    | GGCCAGGTCGAGCgAGgaAGCAGG   | - | 5 | 1 | 0 | 5.51 | 2.76 |
| Chr9:100306060-100306082  | 100306075 | 5 | RNA | GGCCGAGGTCGACTACCGGNNRG    | GgagGAGGcGAC-CCcCGGG       | + | 5 | 2 | 0 | 5.51 | 2.76 |
| Chr1:218649619-218649641  | 218649625 | 4 | RNA | GGCCGAGGTCGACTACCGGNNRG    | tcCCGAG-CagCTAAcGGCGAG     | - | 5 | 2 | 0 | 5.51 | 2.76 |
| Chr4:35292644-35292666    | 35292662  | 2 | RNA | GGCCGAGGTCGACTACCGGNNRG    | aGCaAGGTC-CTACAGGCGAG      | + | 4 | 2 | 0 | 5.51 | 2.76 |
| Chr2:214053615-214053637  | 214053620 | 3 | RNA | GGCCGAGGTCGACTACCGGNNRG    | G-aCGGTCGTCAGCaCgAGCGGG    | - | 5 | 1 | 0 | 5.51 | 2.76 |
| Chr8:47814225-47814247    | 47814231  | 4 | RNA | GGCCGAGGTCGACTACCGGNNRG    | GG-GGcGcGTGGACCGCGGAG      | - | 5 | 2 | 0 | 5.51 | 2.76 |
| Chr3:158011792-158011814  | 158011808 | 4 | RNA | GGCCGAGGTCGACTACCGGNNRG    | G-aCGGTCGTCAGCaCgAGCGGG    | + | 5 | 2 | 0 | 5.51 | 2.76 |
| Chr9:76069602-76069622    | 76069604  | 2 | DNA | GGCCGAGGTCGACTACCGGNNRG    | GGCCGAGTCGCTCGGCTCCGG      | - | 5 | 2 | 0 | 5.51 | 2.76 |
| Chr5:50490958-50490980    | 50490963  | 3 | RNA | GGCCGAGGTCGACTACCGGNNRG    | HCtGgGTGTCcTACCC-CTGG      | - | 5 | 2 | 0 | 5.51 | 2.76 |
| Chr4:117007892-117007914  | 117007908 | 4 | RNA | GGCCGAGGTCGACTACCGGNNRG    | GGCCGcGTCT-ACcACCGCGGG     | + | 3 | 1 | 0 | 5.51 | 2.76 |
| Chr8:118315427-118315449  | 118315443 | 4 | X   | GGCCGAGGTCGACTACCGGNNRG    | GGAaCAGCaGAGTAgCaGcAGG     | + | 5 | 0 | 0 | 5.51 | 2.76 |
| Chr3:64552259-64552281    | 64552277  | 2 | DNA | GGCCGAGGTCGACTACCGGNNRG    | GggaGAGgagaaGACTACCGCGGG   | + | 5 | 1 | 0 | 5.51 | 2.76 |
| Chr5:111781100-111781122  | 111781107 | 5 | RNA | GGCCGAGGTCGACTACCGGNNRG    | GGCaAacTCACT-CCGCGAG       | - | 5 | 1 | 0 | 5.51 | 2.76 |
| Chr4:11473236-11473258    | 11473240  | 2 | RNA | GGCCGAGGTCGACTACCGGNNRG    | aGtttAGGTCGACaA-GGCCCG     | + | 5 | 2 | 0 | 5.51 | 2.76 |
| Chr7:12938680-12938682    | 12938685  | 3 | RNA | GGCCGAGGTCGACTACCGGNNRG    | G-aCGAGTTCGACaCgAGCGGG     | - | 4 | 1 | 1 | 2.71 | 2.71 |
| Chr7:130431026-130431048  | 130431031 | 3 | RNA | GGCCGAGGTCGACTACCGGNNRG    | GG-GAaGcTCGAaCtCGCGAG      | - | 5 | 1 | 2 | 3.40 | 2.65 |
| Chr2:74528155-74528177    | 74528172  | 4 | DNA | GGC-CGAGGTGCAGTACCgGCGNNRG | GcCGCGAGTGCAGTAg-GGCGAG    | + | 4 | 1 | 2 | 3.30 | 2.65 |
| Chr1:183300743-183300765  | 183300749 | 3 | RNA | GGCCGAGGTCGACTACCGGNNRG    | G-CCGCGGTCGATACtGGCAGG     | - | 5 | 1 | 3 | 2.20 | 2.60 |
| Chr2:151640455-151640477  | 151640460 | 3 | RNA | GGCCGAGGTCGACTACCGGNNRG    | G-aCGGTCGTCAGCaCgAGCGGG    | - | 5 | 1 | 4 | 1.10 | 2.55 |
| Chr5:218406195-218406217  | 218406212 | 3 | RNA | GGCCGAGGTCGACTACCGGNNRG    | cG-GAGGgGgAaTACcGCTGG      | + | 5 | 2 | 4 | 1.10 | 2.55 |
| Chr7:172676964-172676986  | 172676981 | 3 | RNA | GGCCGAGGTCGACTACCGGNNRG    | tGCCGAGTgG-TcCTCGCTGG      | + | 5 | 2 | 5 | 0.00 | 2.50 |
| Chr9:7785646-7785668      | 7785653   | 5 | DNA | GGCCGAGGTCGACTACCGGNNRG    | cGgCGAGGcTGCAGcACCGGAG     | - | 5 | 2 | 5 | 0.00 | 2.50 |
| Chr3:41459758-41459780    | 41459775  | 3 | RNA | GGCCGAGGTCGACTACCGGNNRG    | caCCGAGGTgAG-CCGtGAG       | + | 5 | 2 | 5 | 0.00 | 2.50 |
| Chr2:127323580-127323602  | 127323587 | 5 | RNA | GGCCGAGGTCGACTACCGGNNRG    | aGtGAGCTGCAGTACT-CGAG      | - | 5 | 2 | 5 | 0.00 | 2.50 |
| Chr8:58388506-58388528    | 58388513  | 5 | RNA | GGCCGAGGTCGACTACCGGNNRG    | GGTCGAG-TTCACTACaCtCAAG    | - | 5 | 1 | 5 | 0.00 | 2.50 |
| Chr7:55023024-55023046    | 55023031  | 5 | RNA | GGCCGAGGTCGACTACCGGNNRG    | aCCCGAGGTCgCTG-CGgCTGG     | - | 5 | 1 | 5 | 0.00 | 2.50 |
| Chr3:120787484-120787506  | 120787501 | 3 | RNA | GGCCGAGGTCGACTACCGGNNRG    | GG-GAGGTCGgTCTGtGAGG       | - | 5 | 1 | 5 | 0.00 | 2.50 |
| Chr5:45619841-45619863    | 45619858  | 3 | RNA | GGCCGAGGTCGACTACCGGNNRG    | G-CGAGGTGCAGTAgCGGAG       | + | 3 | 2 | 5 | 0.00 | 2.50 |
| Chr3:177913195-177913217  | 177913202 | 5 | RNA | GGCCGAGGTCGACTACCGGNNRG    | cGCaACGTGCAGTACCa-CGAG     | - | 5 | 1 | 5 | 0.00 | 2.50 |
| Chr4:133565679-133565701  | 133565686 | 5 | RNA | GGCCGAGGTCGACTACCGGNNRG    | GgGtcGTC-CTgGgGCGAG        | - | 5 | 2 | 5 | 0.00 | 2.50 |
| Chr9:154291337-154291359  | 154291344 | 5 | RNA | GGCCGAGGTCGACTACCGGNNRG    | aGCaAG-CaACaCCGAcAG        | - | 5 | 2 | 5 | 0.00 | 2.50 |
| Chr10:65936308-65936330   | 65936315  | 5 | RNA | GGCCGAGGTCGACTACCGGNNRG    | GRCCG-GTgcAACCCGAGG        | - | 5 | 2 | 5 | 0.00 | 2.50 |
| Chr2:231454238-231454260  | 231454255 | 3 | RNA | GGCCGAGGTCGACTACCGGNNRG    | GGCCaACGaCaACgACC-CGAG     | + | 5 | 2 | 5 | 0.00 | 2.50 |
| Chr7:120068997-120069019  | 120069014 | 3 | RNA | GGCCGAGGTCGACTACCGGNNRG    | GGCaAGTgGtcCTC-GGCGAG      | + | 5 | 1 | 5 | 0.00 | 2.50 |
| Chr1:192787286-192787308  | 192787303 | 3 | DNA | GGCCGAGGTCG-ACTACCGGNNRG   | GggCGAGGTGCAGTcGgGgAGG     | + | 5 | 1 | 5 | 0.00 | 2.50 |
| Chr5:103391091-103391113  | 103391098 | 5 | RNA | GGCCGAGGTCGACTACCGGNNRG    | GG-GAaGcTCGAaCtCGCGAG      | - | 5 | 2 | 5 | 0.00 | 2.50 |
| Chr10:38036968-38036990   | 38036975  | 5 | RNA | GGCCGAGGTCGACTACCGGNNRG    | GgagGAGCTGCAGTAg-GGCGAG    | - | 5 | 2 | 5 | 0.00 | 2.50 |
| Chr8:173131548-173131570  | 173131555 | 3 | DNA | GGCC-GAGGTGCAGTACCgGCGNNRG | cGCTGAGGTCaCAGcGgCGAGG     | - | 5 | 1 | 5 | 0.00 | 2.50 |
| Chr1:97695165-97695187    | 97695182  | 3 | RNA | GGCCGAGGTCGACTACCGGNNRG    | GG-GAGaTgGAGcGcCGGAGG      | + | 5 | 2 | 5 | 0.00 | 2.50 |
| Chr8:144061144-144061166  | 144061151 | 5 | RNA | GGCCGAGGTCGACTACCGGNNRG    | GgGCG-GGcCaCtCTCGGCTGG     | - | 5 | 1 | 5 | 0.00 | 2.50 |
| Chr5:223785019-223785041  | 223785026 | 5 | RNA | GGCCGAGGTCGACTACCGGNNRG    | GGCCGgGcCaGACaA-CGtCTGG    | - | 5 | 2 | 5 | 0.00 | 2.50 |
| Chr1:217765429-217765451  | 217765436 | 5 | DNA | GGCCGAGGTCGACTACCGGNNRG    | GaCtAGCTGCAGTCAACCGGatTGG  | - | 5 | 2 | 5 | 0.00 | 2.50 |
| Chr8:85459239-85459261    | 85459256  | 3 | RNA | GGCCGAGGTCGACTACCGGNNRG    | GGAaCGAGTtG-ggCCGCGGG      | + | 4 | 2 | 5 | 0.00 | 2.50 |
| Chr7:1512817-1512839      | 1512824   | 5 | RNA | GGCCGAGGTCGACTACCGGNNRG    | GGTCAGGCGAGT-CTgGgGG       | - | 5 | 2 | 5 | 0.00 | 2.50 |
| Chr1:211205132-211205154  | 211205139 | 5 | RNA | GGCCGAGGTCGACTACCGGNNRG    | G-aCGGTCGTCAGCaCgAGCGGG    | - | 5 | 1 | 5 | 0.00 | 2.50 |
| Chr6:159078741-159078763  | 159078758 | 3 | RNA | GGCCGAGGTCGACTACCGGNNRG    | GcTgAGGcctGAC-CCGtCAAG     | + | 5 | 2 | 5 | 0.00 | 2.50 |
| Chr1:130411725-130411747  | 130411742 | 3 | RNA | GGCCGAGGTCGACTACCGGNNRG    | GGCCGAGGTCGACTACCGGNNRG    | - | 5 | 2 | 5 | 0.00 | 2.50 |
| Chr1:162784612-162784634  | 162784619 | 5 | RNA | GGCCGAGGTCGACTACCGGNNRG    | GGCCGAGTCG-CaCtAGCAG       | - | 5 | 2 | 5 | 0.00 | 2.50 |
| Chr6:144539158-144539180  | 144539175 | 3 | DNA | GGC-CGAGGTGCAGTACCgGCGNNRG | GaCAACGgGTGTGCAGcAgaGCGGG  | + | 5 | 2 | 5 | 0.00 | 2.50 |
| Chr2:65855349-65855371    | 65855356  | 5 | DNA | GGCCGAGGTCGACTACCGGNNRG    | GGTCGAGGTCGAGTcCaAGCGCGG   | + | 5 | 2 | 5 | 0.00 | 2.50 |
| Chr10:86321315-86321337   | 86321322  | 3 | RNA | GGCCGAGGTCGACTACCGGNNRG    | aGCCAGGTCgGtcCTGgGCTGG     | - | 5 | 1 | 5 | 0.00 | 2.50 |
| Chr4:46369098-46369120    | 46369115  | 3 | RNA | GGCCGAGGTCGACTACCGGNNRG    | GaCCGAGaaacACT-CCGCGAG     | + | 5 | 2 | 5 | 0.00 | 2.50 |
| Chr7:66541582-66541604    | 66541599  | 3 | RNA | GGCCGAGGTCGACTACCGGNNRG    | GGCaAGGAGgCaCaA-GGGCAG     | + | 5 | 2 | 5 | 0.00 | 2.50 |
| Chr10:136500128-136500150 | 136500135 | 5 | RNA | GGCCGAGGTCGACTACCGGNNRG    | GgGCGAGT-ACTAGCGgGG        | - | 4 | 2 | 5 | 0.00 | 2.50 |
| Chr10:9711459-9711481     | 97114746  | 3 | RNA | GGCCGAGGTCGACTACCGGNNRG    | GggaAGAGGc-CTACtACCGAG     | + | 5 | 2 | 5 | 0.00 | 2.50 |
| Chr7:77052172-77052194    | 77052179  | 3 | RNA | GGCCGAGGTCGACTACCGGNNRG    | GGCCGAGTGCAGTCTCGGCTGG     | - | 4 | 2 | 5 | 0.00 | 2.50 |
| Chr9:6047950-6047952      | 60479567  | 3 | RNA | GGCCGAGGTCGACTACCGGNNRG    | GGCCGAGGTCGACTACCGGNNRG    | - | 5 | 2 | 5 | 0.00 | 2.50 |
| Chr10:135176533-135176555 | 135176549 | 5 | DNA | GGCCGAGGTCGACTACCGGNNRG    | GGCtCGgGTGTCGgCaCGGCGGG    | - | 5 | 2 | 5 | 0.00 | 2.50 |
| Chr1:208246274-208246296  | 208246291 | 3 | RNA | GGCCGAGGTCGACTACCGGNNRG    | GHaCAGaCAGT-CCGgCCAG       | + | 5 | 2 | 5 | 0.00 | 2.50 |
| Chr6:33387550-33387572    | 33387567  | 3 | RNA | GGCCGAGGTCGACTACCGGNNRG    | cGCCAGGTCG-TCaGAGcAG       | + | 5 | 2 | 5 | 0.00 | 2.50 |
| Chr3:211293273-211293295  | 211293280 | 5 | RNA | GGCCGAGGTCGACTACCGGNNRG    | aGC-AGGcGgCAtCCGCGAG       | - | 5 | 2 | 5 | 0.00 | 2.50 |
| Chr7:66242738-66242760    | 66242745  | 5 | RNA | GGCCGAGGTCGACTACCGGNNRG    | GGCCG-GTCACTGcAGGAGG       | - | 5 | 2 | 5 | 0.00 | 2.50 |
| Chr10:111236500-111236522 | 111236507 | 5 | RNA | GGCCGAGGTCGACTACCGGNNRG    | cGaCT-GTGCaCAGCTCGAGG      | - | 5 | 2 | 5 | 0.00 | 2.50 |
| Chr10:124294629-124294651 | 12        |   |     |                            |                            |   |   |   |   |      |      |

|                           |           |   |     |                           |                            |   |   |   |   |      |      |
|---------------------------|-----------|---|-----|---------------------------|----------------------------|---|---|---|---|------|------|
| Chr4:70087974-70087996    | 70087991  | 3 | RNA | GGCCGAGGTCGACTACCGGNNRG   | GcCCGAGGacCaCaCC-ITGG      | + | 5 | 2 | 5 | 0.00 | 2.50 |
| Chr6:61773294-61773316    | 61773311  | 3 | DNA | GGCCGAGGTCG-ACtACCGGNNRG  | GGCCGAGGtCGGAGcCcaCGGG     | + | 5 | 1 | 5 | 0.00 | 2.50 |
| Chr3:92951206-92951228    | 92951223  | 3 | RNA | GGCCGAGGTCGACTACCGGNNRG   | GgGcG-GGcCaCctCCGGCCGG     | + | 5 | 1 | 5 | 0.00 | 2.50 |
| Chr7:101933327-101933349  | 101933334 | 5 | RNA | GGCCGAGGTCGACTACCGGNNRG   | GGCCcAG--aGAtGcAGGCGGG     | - | 5 | 2 | 5 | 0.00 | 2.50 |
| Chr3:129442814-129442836  | 129442821 | 5 | RNA | GGCCGAGGTCGACTACCGGNNRG   | GaCaG-GTTCGACaCaGgaCGCG    | - | 5 | 1 | 5 | 0.00 | 2.50 |
| Chr3:145021398-145021420  | 145021415 | 3 | RNA | GGCCGAGGTCGACTACCGGNNRG   | GcCGGAGGTCGCA-TACtGgaGTGS  | - | 5 | 1 | 5 | 0.00 | 2.50 |
| Chr3:239838730-239838752  | 239838737 | 5 | RNA | GGCCGAGGTCGACTACCGGNNRG   | GcG--HtGGGACTACCGGCTGG     | - | 4 | 2 | 5 | 0.00 | 2.50 |
| Chr1:198971584-198971606  | 198971601 | 3 | DNA | GGCCGAGGT--CGACTACCGGNNRG | GcCGAGtGGCGACTCcaGGCAAG    | + | 4 | 2 | 5 | 0.00 | 2.50 |
| Chr3:97830725-97830747    | 97830732  | 5 | DNA | GGCCGAGGTCGA--CTACCgGNNRG | GgGcGAGgtTgGAGGCTgtGGCAAG  | - | 5 | 2 | 5 | 0.00 | 2.50 |
| Chr1:194591431-194591453  | 194591438 | 5 | RNA | GGCCGAGGTCGACTACCGGNNRG   | GgaCGAcccGACTC-CGGRTAG     | - | 5 | 1 | 5 | 0.00 | 2.50 |
| Chr10:81885111-81885133   | 81885128  | 3 | RNA | GGCCGAGGTCGACTACCGGNNRG   | GRCCG--GTpCCaACCGGaCAG     | + | 5 | 2 | 5 | 0.00 | 2.50 |
| Chr2:161400844-161400866  | 161400861 | 3 | RNA | GGCCGAGGTCGACTACCGGNNRG   | GGCCAGGgGgGtCT-CGgGCTGG    | + | 4 | 1 | 5 | 0.00 | 2.50 |
| Chr4:234155534-23415556   | 23415551  | 3 | RNA | GGCCGAGGTCGACTACCGGNNRG   | tGCGCAaGcGAC-AGcAaCGAGG    | + | 5 | 1 | 5 | 0.00 | 2.50 |
| Chr3:156398865-156398887  | 156398872 | 5 | RNA | GGCCGAGGTCGACTACCGGNNRG   | GGC--HtGGcGACTACCGCTGG     | - | 5 | 2 | 5 | 0.00 | 2.50 |
| Chr2:44925552-44925574    | 44925569  | 3 | RNA | GGCCGAGGTCGACTACCGGNNRG   | G-TCGAGaCGAGtACcCGCAGG     | + | 5 | 1 | 5 | 0.00 | 2.50 |
| Chr2:199451763-199451785  | 199451780 | 3 | RNA | GGCCGAGGTCGACTACCGGNNRG   | GGCCGAGtTCGAg-CctgGGG      | + | 5 | 2 | 5 | 0.00 | 2.50 |
| Chr1:182580711-182580733  | 182580718 | 5 | RNA | GGCCGAGGTCGACTACCGGNNRG   | GGCCGAGcTCGgaA--GgaAG      | + | 5 | 2 | 5 | 0.00 | 2.50 |
| Chr4:206598736-206598758  | 206598743 | 5 | RNA | GGCCGAGGTCGACTACCGGNNRG   | GgaCAAGCT-GAGcAGgGcAGG     | - | 5 | 1 | 5 | 0.00 | 2.50 |
| Chr3:100225721-100225743  | 100225738 | 3 | RNA | GGCCGAGGTCGACTACCGGNNRG   | GaACAGGTCaACTGctL--CGGG    | + | 5 | 2 | 5 | 0.00 | 2.50 |
| Chr2:59873070-59873092    | 59873087  | 3 | RNA | GGCCGAGGTCGACTACCGGNNRG   | GGC--HtGcAGACTACCGCTGG     | + | 3 | 2 | 5 | 0.00 | 2.50 |
| Chr1:137635972-137635994  | 137635989 | 3 | RNA | GGCCGAGGTCGACTACCGGNNRG   | GGCCGAtCTCG--atCaGCAAG     | + | 5 | 2 | 5 | 0.00 | 2.50 |
| Chr2:34031210-34031232    | 34031227  | 3 | RNA | GGCCGAGGTCGACTACCGGNNRG   | G--CGAcGAGCAGcCcgGCGAG     | + | 5 | 2 | 5 | 0.00 | 2.50 |
| Chr1:218040835-218040857  | 218040852 | 3 | RNA | GGCCGAGGTCGACTACCGGNNRG   | GGcGAGGTCG--HtGgtaAG       | + | 5 | 2 | 5 | 0.00 | 2.50 |
| Chr1:118689618-118689640  | 118689625 | 5 | RNA | GGCCGAGGTCGACTACCGGNNRG   | tagCGAGGTgGcCTAC--GCGGG    | - | 5 | 2 | 5 | 0.00 | 2.50 |
| Chr10:137336849-137336871 | 137336866 | 3 | RNA | GGCCGAGGTCGACTACCGGNNRG   | GRtCCAGGT--ACTLcaAGCCGG    | + | 4 | 2 | 5 | 0.00 | 2.50 |
| Chr7:132378711-132378733  | 132378718 | 3 | RNA | GGCCGAGGTCGACTACCGGNNRG   | GGCCGAGGTCGACTACCGGNNRG    | - | 5 | 2 | 5 | 0.00 | 2.50 |
| Chr8:93717635-93717657    | 93717642  | 3 | RNA | GGCCGAGGTCGACTACCGGNNRG   | GGCCGAG--CaAggaAGcGCAAG    | - | 5 | 2 | 5 | 0.00 | 2.50 |
| Chr2:30605462-30605484    | 30605479  | 3 | RNA | GGCCGAGGTCGACTACCGGNNRG   | GggaAGGTCaCGACG--CGGG      | + | 5 | 2 | 5 | 0.00 | 2.50 |
| Chr4:211794527-211794549  | 211794534 | 5 | X   | GGCCGAGGTCGACTACCGGNNRG   | GGCCGAGGcCGAGctGgGCGAG     | - | 5 | 0 | 5 | 0.00 | 2.50 |
| Chr9:52942755-52942777    | 52942762  | 5 | RNA | GGCCGAGGTCGACTACCGGNNRG   | G-aCGgGTCGAGcAGaCGaGGG     | - | 5 | 1 | 5 | 0.00 | 2.50 |
| Chr9:88453297-88453319    | 88453314  | 3 | RNA | GGCCGAGGTCGACTACCGGNNRG   | GG--GAGGATGAGtAGCgtAGG     | + | 5 | 2 | 5 | 0.00 | 2.50 |
| Chr5:3147718-3147740      | 3147725   | 5 | RNA | GGCCGAGGTCGACTACCGGNNRG   | GGCCaAa--GACaAatCGCTGG     | - | 5 | 2 | 5 | 0.00 | 2.50 |
| Chr4:239488684-239488706  | 239488701 | 3 | RNA | GGCCGAGGTCGACTACCGGNNRG   | GGCCGcGcCGAIt--CGGCCGG     | + | 3 | 2 | 5 | 0.00 | 2.50 |
| Chr2:72470288-72470310    | 72470305  | 3 | RNA | GGCCGAGGTCGACTACCGGNNRG   | GaCCGAa--CGAGcACCGGCAAG    | + | 3 | 2 | 5 | 0.00 | 2.50 |
| Chr1:262569085-262569107  | 262569102 | 3 | RNA | GGCCGAGGTCGACTACCGGNNRG   | GGCCGtGtcCG-CcgCGCGCAG     | + | 5 | 1 | 5 | 0.00 | 2.50 |
| Chr10:67750513-67750518   | 67750520  | 5 | RNA | GGCCGAGGTCGACTACCGGNNRG   | GtGaAGAGggaGAC--tGACTGCTG  | - | 5 | 1 | 5 | 0.00 | 2.50 |
| Chr2:53062851-53062873    | 53062858  | 5 | DNA | GGCCGAGGTCGACTACCGGNNRG   | ctCCaAGGTCGACaAAtCCGGCAGG  | - | 4 | 2 | 5 | 0.00 | 2.50 |
| Chr9:7013318-7013340      | 7013325   | 5 | DNA | GGCCGAGGTCGACTACCGGNNRG   | GRtCTGgGgaGtCHtCCGGCTGG    | - | 5 | 1 | 5 | 0.00 | 2.50 |
| Chr9:82081647-82081669    | 82081654  | 5 | RNA | GGCCGAGGTCGACTACCGGNNRG   | cGgCGAGtAGTCGAaactCCGGCGAG | - | 5 | 1 | 5 | 0.00 | 2.50 |
| Chr5:151398762-151398784  | 151398779 | 3 | RNA | GGCCGAGGTCGACTACCGGNNRG   | GG--GAGAtgaACTTCGgaAGG     | + | 5 | 2 | 5 | 0.00 | 2.50 |
| Chr1:304742668-304742690  | 304742685 | 3 | RNA | GGCCGAGGTCGACTACCGGNNRG   | aGCCGg--aGaATcAGcCGGG      | + | 5 | 2 | 5 | 0.00 | 2.50 |
| Chr2:17907161-17907183    | 17907178  | 3 | DNA | GGCCGAGGTCGACTA--CCGGNNRG | ctCCAGGcCGACaCAAtCCGGCAGG  | + | 5 | 2 | 5 | 0.00 | 2.50 |
| Chr1:92062580-92062602    | 92062587  | 3 | RNA | GGCCGAGGTCGACTACCGGNNRG   | GtCttGGT-GaCCaCCGCGAG      | - | 5 | 1 | 5 | 0.00 | 2.50 |
| Chr2:133229184-133229206  | 133229201 | 3 | RNA | GGCCGAGGTCGACTACCGGNNRG   | G--CGAGGcGtCTACCGCGCG      | + | 3 | 2 | 5 | 0.00 | 2.50 |
| Chr4:44510781-44510803    | 44510798  | 3 | RNA | GGCCGAGGTCGACTACCGGNNRG   | cGCCGAGGTaGAGtA--GGCAGG    | + | 4 | 2 | 5 | 0.00 | 2.50 |
| Chr8:114282077-114282099  | 114282084 | 5 | DNA | GGCCGAGGTCGACTACCGGNNRG   | tGCGAGGTCGCG-ACtAGGCTGG    | - | 5 | 1 | 5 | 0.00 | 2.50 |
| Chr1:28292439-28292461    | 28292456  | 3 | RNA | GGCCGAGGTCGACTACCGGNNRG   | GGCCaAGcGcG--aATCGCCGG     | - | 5 | 2 | 5 | 0.00 | 2.50 |
| Chr7:182231025-182231047  | 182231042 | 3 | RNA | GGCCGAGGTCGACTACCGGNNRG   | GGC--HtGcGAGTACTCCGGCTGG   | + | 4 | 2 | 5 | 0.00 | 2.50 |
| Chr2:58693796-58693818    | 58693803  | 5 | RNA | GGCCGAGGTCGACTACCGGNNRG   | GG--GAGAtgaACTTCGgaAGG     | - | 5 | 2 | 5 | 0.00 | 2.50 |
| Chr8:25629545-25629567    | 25629562  | 3 | RNA | GGCCGAGGTCGACTACCGGNNRG   | G-aCGgGTCGACaCaAGaCGaGGG   | + | 5 | 1 | 5 | 0.00 | 2.50 |
| Chr7:146414653-146414675  | 146414670 | 3 | RNA | GGCCGAGGTCGACTACCGGNNRG   | GgGgaAGaATCGACTtC--GtGTG   | + | 5 | 2 | 5 | 0.00 | 2.50 |
| Chr3:138783219-138783241  | 138783236 | 3 | RNA | GGCCGAGGTCGACTACCGGNNRG   | GGC--HtGcGAGTACTCCGGCTGG   | + | 5 | 2 | 5 | 0.00 | 2.50 |
| Chr3:128477406-128477428  | 128477413 | 5 | RNA | GGCCGAGGTCGACTACCGGNNRG   | tGC--AGGcCGACaCaCGACTAG    | - | 5 | 2 | 5 | 0.00 | 2.50 |
| Chr5:165674116-165674138  | 165674123 | 5 | RNA | GGCCGAGGTCGACTACCGGNNRG   | G-aCGgGTCGAGcAGaCGaCGAGG   | - | 5 | 1 | 5 | 0.00 | 2.50 |
| Chr4:221870198-221870220  | 221870215 | 3 | RNA | GGCCGAGGTCGACTACCGGNNRG   | GtGcGAGGTTCGAGcAGa--aCGG   | + | 4 | 2 | 5 | 0.00 | 2.50 |
| Chr1:151859796-151859818  | 151859813 | 3 | RNA | GGCCGAGGTCGACTACCGGNNRG   | GtGgCAGGTCGACTACCGGNNRG    | - | 5 | 2 | 5 | 0.00 | 2.50 |
| Chr1:139517907-139517929  | 139517924 | 3 | RNA | GGCCGAGGTCGACTACCGGNNRG   | Gg--GtGTCGACaCaCaCGAGG     | + | 5 | 2 | 5 | 0.00 | 2.50 |
| Chr8:171457896-171457918  | 171457903 | 5 | RNA | GGCCGAGGTCGACTACCGGNNRG   | GgCGAGGTCG--TtGgaGaAG      | - | 5 | 2 | 5 | 0.00 | 2.50 |
| Chr2:131249967-131249989  | 131249974 | 5 | DNA | GGCCGAGGTCGACTA--CCGGNNRG | cGCAaAGGcCGACaAATCCGGCAGG  | - | 5 | 2 | 5 | 0.00 | 2.50 |
| Chr5:77159066-77159088    | 77159083  | 3 | RNA | GGCCGAGGTCGACTACCGGNNRG   | G-aCGgGTCGACaCaAGaCGaGGG   | + | 5 | 1 | 5 | 0.00 | 2.50 |
| Chr10:266540-266562       | 266557    | 3 | DNA | GGCCGAGGTCGACTACCGGNNRG   | cGCTCGAGTtGgCcaCaGGCGAG    | + | 5 | 1 | 5 | 0.00 | 2.50 |
| Chr7:43887934-43887956    | 43887941  | 5 | RNA | GGCCGAGGTCGACTACCGGNNRG   | G-aCGgGTCGACaCaAGaCGaGGG   | - | 5 | 1 | 5 | 0.00 | 2.50 |
| Chr2:88096193-88096215    | 88096200  | 5 | X   | GGCCGAGGTCGACTACCGGNNRG   | GgaAGAGTtGcCTAGcGGCTGG     | - | 5 | 0 | 5 | 0.00 | 2.50 |
| Chr6:19224183-19224205    | 19224190  | 5 | RNA | GGCCGAGGTCGACTACCGGNNRG   | GGC--HtGGcGACTACCGGCTGG    | - | 4 | 2 | 5 | 0.00 | 2.50 |
| Chr3:15524289-15524311    | 15524296  | 5 | RNA | GGCCGAGGTCGACTACCGGNNRG   | GcCaCGAGGTCGACTt--GgaAGG   | + | 5 | 2 | 5 | 0.00 | 2.50 |
| Chr2:28078546-28078568    | 28078563  | 3 | RNA | GGCCGAGGTCGACTACCGGNNRG   | tGCGAGGTCGACTACCGGNNRG     | - | 5 | 2 | 5 | 0.00 | 2.50 |
| Chr7:79915664-79915686    | 79915671  | 3 | RNA | GGCCGAGGTCGACTACCGGNNRG   | GcCaAGG--CGACTtGtGtCGCCG   | - | 5 | 1 | 5 | 0.00 | 2.50 |
| Chr7:74928865-74928887    | 74928872  | 5 | RNA | GGCCGAGGTCGACTACCGGNNRG   | GRcGAGcTCACTtGcCG-CCGG     | + | 5 | 1 | 5 | 0.00 | 2.50 |
| Chr8:170611572-170611594  | 170611589 | 3 | RNA | GGCCGAGGTCGACTACCGGNNRG   | GGCCGAGGtGtGtCT-CGgGCTGG   | + | 4 | 1 | 5 | 0.00 | 2.50 |
| Chr7:163533997-163534019  | 163534014 | 3 | RNA | GGCCGAGGTCGACTACCGGNNRG   | GGCCcAG--CGAcgCGaGCAAG     | + | 5 | 2 | 5 | 0.00 | 2.50 |
| Chr1:119842350-119842372  | 119842367 | 3 | DNA | GGCCGAGGTCGACTACCGGNNRG   | GgGcGAGcTCGACAttgGACGAGG   | + | 5 | 1 | 5 | 0.00 | 2.50 |
| Chr2:66148672-66148694    | 66148689  | 3 | RNA | GGCCGAGGTCGACTACCGGNNRG   | GGCCCA--TCgttCaGgGCCAG     | + | 5 | 2 | 5 | 0.00 | 2.50 |
| Chr2:22445536-22445558    | 22445543  | 3 | RNA | GGCCGAGGTCGACTACCGGNNRG   | G-CTtGcGtGAGtACtGGCAGG     | - | 5 | 1 | 5 | 0.00 | 2.50 |
| Chr4:53984293-53984315    | 53984310  | 3 | RNA | GGCCGAGGTCGACTACCGGNNRG   | GC-GAGGTTCGAGcGCaGcCGG     | + | 4 | 1 | 5 | 0.00 | 2.50 |
| Chr4:12529706-12529728    | 12529723  | 3 | DNA | GGC--CGAGtTCGACTACCGGNNRG | GGCTCTGgGgGtCaCacCCGGCGGG  | + | 5 | 2 | 5 | 0.00 | 2.50 |
| Chr9:3647880-36478802     | 36478807  | 3 | RNA | GGCCGAGGTCGACTACCGGNNRG   | GGCCGAGGTCGACTACCGGNNRG    | - | 5 | 2 | 5 | 0.00 | 2.50 |
| Chr7:77796091-77796113    | 77796108  | 3 | DNA | G-GCCGAGGTCGACTACCGGNNRG  | GRCCc--GTgGTCGACGgaCAG     | - | 5 | 2 | 5 | 0.00 | 2.50 |
| Chr3:96384534-96384556    | 96384551  | 3 | RNA | GGCCGAGGTCGACTACCGGNNRG   | GRtCGAGTCArC--CCGgtTAG     | + | 4 | 2 | 5 | 0.00 | 2.50 |
| Chr4:67320914-67320936    | 67320921  | 5 | RNA | GGCCGAGGTCGACTACCGGNNRG   | GGCCGgGcTaaGTCt--GGCTAG    | - | 5 | 2 | 5 | 0.00 | 2.50 |
| Chr1:109314742-109314764  | 109314749 | 5 | RNA | GGCCGAGGTCGACTACCGGNNRG   | GGCCGAGGaGacCT-CGgGCTGG    | - | 4 | 1 | 5 | 0.00 | 2.50 |
| Chr8:54564954-54564976    | 54564971  | 3 | DNA | GGCCGAGGTCGACTACCGGNNRG   | GaCaTAGGtTtGAGcACCaGCGGG   | + | 5 | 1 | 5 | 0.00 | 2.50 |
| Chr8:127697101-127697123  | 127697118 | 3 | RNA | GGCCGAGGTCGACTACCGGNNRG   | G-aCGgGTCGACaCaAGaCGaGGG   | + | 5 | 1 | 5 | 0.00 | 2.50 |
| Chr5:192640023-192640045  | 192640030 | 5 | RNA | GGCCGAGGTCGACTACCGGNNRG   | aGC--HtGcGACTACCGGCTGG     | - | 5 | 2 | 5 | 0.00 | 2.50 |
| Chr4:93186487-93186509    | 93186494  | 5 | RNA | GGCCGAGGTCGACTACCGGNNRG   | aGCCGcGGTtGcGga--GGCTAG    | - | 5 | 2 | 5 | 0.00 | 2.50 |
| Chr8:65248729-65248751    | 65248746  | 3 | RNA | GGCCGAGGTCGACTACCGGNNRG   | GgaGAGaATtG--HtCGCCCG      | + | 5 | 2 | 5 | 0.00 | 2.50 |
| Chr7:68428927-68428949    | 68428934  | 3 | RNA | GGCCGAGGTCGACTACCGGNNRG   | GG--GAGTCGAGaGgaCGaGG      | + | 5 | 1 | 5 | 0.00 | 2.50 |
| Chr2:118505663-118505685  | 118505680 | 3 | RNA | GGCCGAGGTCGACTACCGGNNRG   | GgggAGGTCG--TAGgGCTGG      | + | 5 | 2 | 5 | 0.00 | 2.50 |
| Chr8:5110933-5110955      | 5110940   | 5 | DNA | GGCCGAGGTCGACTA--CCGGNNRG | ctCCAGGcCGACaAAtCCGGCAGG   | - | 5 | 2 | 5 | 0.00 | 2.50 |
| Chr10:48124588-48124610   | 48124605  | 3 | DNA | GGC--CGAGTTCGACTACCGGNNRG | GGCTCTGgGgGtCaCacCCGGCGGG  | + | 5 | 2 | 5 | 0.00 | 2.50 |
| Chr5:158087904-158087926  | 158087911 | 5 | RNA | GGCCGAGGTCGACTACCGGNNRG   | GAGgaGgGAGTCT-CCGGCGAG     | - | 5 | 1 | 5 | 0.00 | 2.50 |
| Chr3:44342876-44342898    | 44342883  | 3 | RNA | GGCCGAGGTCGACTACCGGNNRG   | GgGcGcGcGT-CAGTtGtGGCCGG   | - | 5 | 1 | 5 | 0.00 | 2.50 |
| Chr3:31201635-31201657    | 31201652  | 3 | RNA | GGCCGAGGTCGACTACCGGNNRG   | tGCCAGG--GAGAtaGgCAAG      | + | 5 | 2 | 5 | 0.00 | 2.50 |
| Chr1:15490                |           |   |     |                           |                            |   |   |   |   |      |      |

|                          |   |     |                           |                            |   |   |   |   |      |      |
|--------------------------|---|-----|---------------------------|----------------------------|---|---|---|---|------|------|
| Chr9:10483340-104833452  | 4 | RNA | GGCCGAGGTCGACTACCGGNNRG   | aGCCG-GcGCaCaACaGaAG       | - | 5 | 2 | 0 | 4.96 | 2.48 |
| Chr10:78339100-78339122  | 2 | RNA | GGCCGAGGTCGACTACCGGNNRG   | GcCgaAGTGG-TgCCGCGAAG      | - | 5 | 2 | 0 | 4.96 | 2.48 |
| Chr3:67721785-67721807   | 3 | RNA | GGCCGAGGTCGACTACCGGNNRG   | GGCCGAGGTCGACtCAcT-        | - | 3 | 2 | 0 | 4.96 | 2.48 |
| Chr1:179482810-179482837 | 3 | DNA | GGCCGAGGTCGACTAC-CGGGNNRG | GGaCGAGTCGCGgCGCGCGCTGG    | + | 5 | 2 | 0 | 4.96 | 2.48 |
| Chr5:155563529-155563551 | 2 | RNA | GGCCGAGGTCGACTACCGGNNRG   | GGaCaAGGTGG-TcCcaGTGTGG    | + | 5 | 2 | 0 | 4.96 | 2.48 |
| Chr2:109941218-109941240 | 4 | RNA | GGCCGAGGTCGACTACCGGNNRG   | CG-GAGGAGGATACCGCTGG       | + | 5 | 2 | 0 | 4.96 | 2.48 |
| Chr4:70664764-70664786   | 4 | RNA | GGCCGAGGTCGACTACCGGNNRG   | GGaCaAGGTGG-TcCcaGTGTGG    | - | 5 | 2 | 0 | 4.96 | 2.48 |
| Chr7:26041820-26041842   | 2 | RNA | GGCCGAGGTCGACTACCGGNNRG   | GGCGAGGTGG-TlGgGcaAG       | + | 5 | 2 | 0 | 4.96 | 2.48 |
| Chr9:145402222-145402244 | 3 | RNA | GGCCGAGGTCGACTACCGGNNRG   | GgcGGRGTaGc-CCGCGCAG       | - | 5 | 2 | 0 | 4.96 | 2.48 |
| Chr1:167309177-167309199 | 5 | RNA | GGCCGAGGTCGACTACCGGNNRG   | acCCGAITGGC-TACgaGCTAG     | - | 5 | 2 | 0 | 4.96 | 2.48 |
| Chr5:193726588-193726610 | 5 | RNA | GGCCGAGGTCGACTACCGGNNRG   | GGCCaAGGTCGg-TacGTGCAAG    | - | 4 | 1 | 0 | 4.96 | 2.48 |
| Chr1:147651919-147651941 | 4 | DNA | GGCCGAGGTCGACTACC-GGCNNRG | GGGCaAGGTCGCTkTgCaAGGCGCAG | - | 4 | 2 | 0 | 4.96 | 2.48 |
| Chr4:239022854-239022876 | 5 | RNA | GGCCGAGGTCGACTACCGGNNRG   | GcCGAGGcGAC-CCGtCAAG       | - | 5 | 2 | 0 | 4.96 | 2.48 |
| Chr4:206793171-206793193 | 5 | RNA | GGCCGAGGTCGACTACCGGNNRG   | GGCCG-GcCAcTlCCGgCAG       | + | 5 | 2 | 0 | 4.96 | 2.48 |
| Chr2:162983071-162983093 | 3 | RNA | GGCCGAGGTCGACTACCGGNNRG   | GGTCGAGGTG-ACaAtaGaCAGG    | - | 5 | 1 | 0 | 4.96 | 2.48 |
| Chr8:96802599-96802621   | 4 | RNA | GGCCGAGGTCGACTACCGGNNRG   | GGcCGA-TCGaGgAGGCGCG       | + | 3 | 1 | 0 | 4.96 | 2.48 |
| Chr2:134103104-134103126 | 3 | RNA | GGCCGAGGTCGACTACCGGNNRG   | GGGCGAGGCGGCaagAt-GGCGGG   | + | 5 | 1 | 0 | 4.96 | 2.48 |
| Chr6:65982269-65982291   | 5 | RNA | GGCCGAGGTCGACTACCGGNNRG   | aGC-AGGTGCAGttaaGGCCGG     | + | 5 | 2 | 0 | 4.96 | 2.48 |
| Chr6:108385885-108385907 | 2 | RNA | GGCCGAGGTCGACTACCGGNNRG   | GGCGAG-TCCaCcaCCaCTAG      | + | 5 | 1 | 0 | 4.96 | 2.48 |
| Chr10:71156174-71156196  | 5 | RNA | GGCCGAGGTCGACTACCGGNNRG   | GGCCGAaaTCCcTCc-CTGG       | - | 5 | 2 | 0 | 4.96 | 2.48 |
| Chr4:107995249-107995271 | 3 | RNA | GGCCGAGGTCGACTACCGGNNRG   | GGC-AGGcTGaGCTgTGCGCAG     | - | 4 | 1 | 0 | 4.96 | 2.48 |
| Chr2:49221166-49221188   | 3 | DNA | GGC-CGAGGTCGACTACCGGNNRG  | GcTCTGAGGAGGcTCTCCGCTGG    | + | 4 | 1 | 0 | 4.96 | 2.48 |
| Chr9:16620561-16620583   | 3 | RNA | GGCCGAGGTCGACTACCGGNNRG   | G-ClAAGTTCGgagACCGtCGG     | + | 5 | 2 | 0 | 4.96 | 2.48 |
| Chr5:96941919-96941941   | 4 | RNA | GGCCGAGGTCGACTACCGGNNRG   | G-aCGgGTCTGCaCaCgaCGGCG    | + | 5 | 1 | 0 | 4.96 | 2.48 |
| Chr6:145848412-145848434 | 4 | RNA | GGCCGAGGTCGACTACCGGNNRG   | GGCCCGAGTcCG-GaCCaGaTAG    | - | 5 | 1 | 0 | 4.96 | 2.48 |
| Chr7:133210223-133210245 | 2 | RNA | GGCCGAGGTCGACTACCGGNNRG   | GGCCGAGGTCGACTACCGGNNRG    | + | 5 | 2 | 0 | 4.96 | 2.48 |
| Chr4:142823192-142823214 | 4 | X   | GGCCGAGGTCGACTACCGGNNRG   | GGGcGAGTCTAGaAGcGgCGCG     | + | 5 | 0 | 0 | 4.96 | 2.48 |
| Chr8:22412025-22412047   | 2 | RNA | GGCCGAGGTCGACTACCGGNNRG   | GGGCG-GGcCaaCccCGCGCGG     | + | 5 | 1 | 0 | 4.96 | 2.48 |
| Chr4:208161430-208161452 | 4 | RNA | GGCCGAGGTCGACTACCGGNNRG   | GGaGAGGAGCTAGT-CatCAAG     | - | 5 | 2 | 0 | 4.96 | 2.48 |
| Chr6:62578280-62578302   | 2 | RNA | GGCCGAGGTCGACTACCGGNNRG   | aGC-AGaTCGACTtaaGGCCGG     | + | 5 | 2 | 0 | 4.96 | 2.48 |
| Chr3:83892362-83892384   | 5 | RNA | GGCCGAGGTCGACTACCGGNNRG   | GG-GaCaTcAtaTACCgGCTAG     | + | 5 | 2 | 0 | 4.96 | 2.48 |
| Chr10:99222241-99222263  | 3 | RNA | GGCCGAGGTCGACTACCGGNNRG   | GGCaAGGat-ACtACaGGCAGG     | - | 5 | 1 | 0 | 4.96 | 2.48 |
| Chr2:75002590-75002612   | 4 | DNA | GGCCGAG-GTCGACTACCGGNNRG  | aGCCAGAGCGCGCaCACCGGCGGAG  | - | 5 | 1 | 0 | 4.96 | 2.48 |
| Chr7:43788995-43789017   | 3 | RNA | GGCCGAGGTCGACTACCGGNNRG   | tGCCGgCTCGcCT-CCgGCG       | + | 5 | 2 | 0 | 4.96 | 2.48 |
| Chr2:111869271-111869293 | 2 | RNA | GGCCGAGGTCGACTACCGGNNRG   | GGCCcGcGT-GaGTACgGGRGAG    | + | 5 | 1 | 0 | 4.96 | 2.48 |
| Chr2:216239561-216239584 | 4 | RNA | GGCCGAGGTCGACTACCGGNNRG   | GGCCGAGGTCGACTACCGGNNRG    | + | 5 | 2 | 0 | 4.96 | 2.48 |
| Chr1:118097494-118097516 | 4 | RNA | GGCCGAGGTCGACTACCGGNNRG   | GcTCGCTCTGCAC-ACgaCTGG     | + | 5 | 1 | 0 | 4.96 | 2.48 |
| Chr2:182693714-182693736 | 4 | DNA | GGCCGAGGTCGACTACC-GGCNNRG | aGCCaCGcGAGCTgCAAGGCGGG    | + | 5 | 2 | 0 | 4.96 | 2.48 |
| Chr4:18892791-18892813   | 3 | RNA | GGCCGAGGTCGACTACCGGNNRG   | G-CGGtTtACaACCCGCGAG       | - | 5 | 1 | 0 | 4.96 | 2.48 |
| Chr8:14811737-14811759   | 4 | RNA | GGCCGAGGTCGACTACCGGNNRG   | G-CCGAaGTaAcACACtCGCTGG    | + | 5 | 1 | 0 | 4.96 | 2.48 |
| Chr8:34557825-34557847   | 3 | RNA | GGCCGAGGTCGACTACCGGNNRG   | cCGCcGcCT-CTcCGtCAAG       | + | 5 | 2 | 0 | 4.96 | 2.48 |
| Chr2:1399700-1399722     | 4 | DNA | GGCCGAGGTCG-ACtACCgGNNRG  | GcTCCAGGTCGTgTtACCTCGGG    | + | 5 | 2 | 0 | 4.96 | 2.48 |
| Chr7:134261506-134261528 | 4 | RNA | GGCCGAGGTCGACTACCGGNNRG   | GGCGAGa-CatCTlCCGCTGG      | + | 5 | 1 | 0 | 4.96 | 2.48 |
| Chr10:18704782-18704804  | 5 | RNA | GGCCGAGGTCGACTACCGGNNRG   | GcTCGAGGTgACTAC-GGgTAG     | - | 5 | 1 | 0 | 4.96 | 2.48 |
| Chr10:89301823-89301845  | 4 | RNA | GGCCGAGGTCGACTACCGGNNRG   | GGaGAGGAGGACT-CGgaCGAG     | + | 5 | 2 | 0 | 4.96 | 2.48 |
| Chr8:14299715-14299737   | 4 | RNA | GGCCGAGGTCGACTACCGGNNRG   | GGCGAGG-CGaGgAGGCTGG       | + | 5 | 1 | 0 | 4.96 | 2.48 |
| Chr8:73523661-73523683   | 3 | RNA | GGCCGAGGTCGACTACCGGNNRG   | tCCCGGTGTGcGc-CCGCGGG      | + | 4 | 2 | 0 | 4.96 | 2.48 |
| Chr2:666036-666058       | 4 | RNA | GGCCGAGGTCGACTACCGGNNRG   | tcCGACAGCTcTACT-CCggaAAG   | + | 5 | 2 | 0 | 4.96 | 2.48 |
| Chr9:117044286-117044308 | 3 | RNA | GGCCGAGGTCGACTACCGGNNRG   | GGCCAGGccGagT-CGhGGG       | - | 5 | 2 | 0 | 4.96 | 2.48 |
| Chr2:98435223-98435245   | 3 | DNA | GGCCGAGGTCGACTACC-GGCNNRG | GcTCGAGtCaACACtAGGCGAG     | + | 5 | 2 | 0 | 4.96 | 2.48 |
| Chr2:103423915-103423937 | 2 | RNA | GGCCGAGGTCGACTACCGGNNRG   | GGCaAaG-GACTCGgGCCAG       | + | 4 | 2 | 0 | 4.96 | 2.48 |
| Chr3:131973043-131973065 | 5 | RNA | GGCCGAGGTCGACTACCGGNNRG   | GGgaAaGTgGaCgaAGCG-CTGG    | + | 5 | 1 | 0 | 4.96 | 2.48 |
| Chr6:152415481-152415503 | 2 | RNA | GGCCGAGGTCGACTACCGGNNRG   | GgaTGA-G-aGCaACtGGCGAG     | + | 5 | 2 | 0 | 4.96 | 2.48 |
| Chr8:109840741-109840763 | 5 | RNA | GGCCGAGGTCGACTACCGGNNRG   | GtRCG-GGcGtRCtACtGGCGGG    | + | 5 | 1 | 0 | 4.96 | 2.48 |
| Chr6:11550926-11550948   | 2 | RNA | GGCCGAGGTCGACTACCGGNNRG   | GGCCaAGGCGcCT-CGgCGAG      | + | 4 | 1 | 0 | 4.96 | 2.48 |
| Chr4:6551562-65515644    | 5 | RNA | GGCCGAGGTCGACTACCGGNNRG   | GGC-HtGGGACTACCGCTGG       | + | 5 | 2 | 0 | 4.96 | 2.48 |
| Chr1:153168105-153168127 | 5 | RNA | GGCCGAGGTCGACTACCGGNNRG   | GGGCG-GGcCaCccCGCGCTGG     | + | 5 | 1 | 0 | 4.96 | 2.48 |
| Chr3:179124793-179124815 | 3 | RNA | GGCCGAGGTCGACTACCGGNNRG   | GGC-HtGGGACTACCGCTGG       | + | 4 | 2 | 0 | 4.96 | 2.48 |
| Chr1:304148669-304148691 | 5 | RNA | GGCCGAGGTCGACTACCGGNNRG   | GtCtGTGT-GACACCGCGCAG      | + | 5 | 1 | 0 | 4.96 | 2.48 |
| Chr2:149089809-149089831 | 4 | RNA | GGCCGAGGTCGACTACCGGNNRG   | GGC-AGGcCaACTCCGCGGG       | + | 4 | 2 | 0 | 4.96 | 2.48 |
| Chr8:74798064-74798086   | 3 | RNA | GGCCGAGGTCGACTACCGGNNRG   | GGTCGgGTaG-aCCCGgaAG       | + | 5 | 2 | 0 | 4.96 | 2.48 |
| Chr8:70236156-70236178   | 4 | RNA | GGCCGAGGTCGACTACCGGNNRG   | a-CCGAGGTCAGctGgGCGAG      | + | 5 | 1 | 0 | 4.96 | 2.48 |
| Chr2:85574295-85574317   | 5 | RNA | GGCCGAGGTCGACTACCGGNNRG   | G-aCGAGGTCAGCaAGCGCGGG     | + | 4 | 1 | 0 | 4.96 | 2.48 |
| Chr7:34662937-34662959   | 3 | RNA | GGCCGAGGTCGACTACCGGNNRG   | GGC-HtGcACTACCGGCTGG       | + | 4 | 2 | 0 | 4.96 | 2.48 |
| Chr4:106462938-106462960 | 4 | DNA | GGCCGAGGTCG-ACtACCgGNNRG  | aGCTtACGTCCGaAaCaGCTGAG    | + | 5 | 1 | 0 | 4.96 | 2.48 |
| Chr1:13396136-13396158   | 4 | RNA | GGCCGAGGTCGACTACCGGNNRG   | GGCCGAGGTCGACTACCGGNNRG    | + | 5 | 2 | 0 | 4.96 | 2.48 |
| Chr7:180147340-180147362 | 4 | RNA | GGCCGAGGTCGACTACCGGNNRG   | G-CCGAGGAGGAGaGCGCGGTGG    | + | 4 | 1 | 0 | 4.96 | 2.48 |
| Chr4:145616709-145616731 | 3 | RNA | GGCCGAGGTCGACTACCGGNNRG   | GGGCGAGGtGG-GaACtCGaAG     | + | 5 | 2 | 0 | 4.96 | 2.48 |
| Chr5:116752231-116752253 | 3 | RNA | GGCCGAGGTCGACTACCGGNNRG   | GGCCAGGtGCaACCaCC-gTGG     | - | 5 | 2 | 0 | 4.96 | 2.48 |
| Chr2:63483043-63483065   | 4 | RNA | GGCCGAGGTCGACTACCGGNNRG   | GtGtCGG-GaCaACCCGCAAG      | - | 5 | 2 | 0 | 4.96 | 2.48 |
| Chr9:143141983-143142005 | 3 | RNA | GGCCGAGGTCGACTACCGGNNRG   | GGCaAGGTtGAGg-CGGCGGG      | - | 5 | 2 | 0 | 4.96 | 2.48 |
| Chr5:95635826-95635848   | 3 | RNA | GGCCGAGGTCGACTACCGGNNRG   | GGCTG-GGTCACTgTgCGCTGG     | + | 5 | 1 | 0 | 4.96 | 2.48 |
| Chr1:205664183-205664205 | 3 | DNA | GGC-CGAGGTCGACTACCGGNNRG  | GcTCTGAGGAGcTCTCCGCTGG     | + | 4 | 1 | 0 | 4.96 | 2.48 |
| Chr3:16510324-16510346   | 2 | RNA | GGCCGAGGTCGACTACCGGNNRG   | GGC-GAGGTctCctctCGCCAG     | + | 5 | 1 | 0 | 4.96 | 2.48 |
| Chr8:110049406-110049428 | 2 | RNA | GGCCGAGGTCGACTACCGGNNRG   | tGaAGAGTCTGACTACaG-CAGG    | - | 5 | 1 | 0 | 4.96 | 2.48 |
| Chr7:124425503-124425525 | 3 | RNA | GGCCGAGGTCGACTACCGGNNRG   | tGCGCGGTCGACTACtCGGAG      | + | 5 | 1 | 0 | 4.96 | 2.48 |
| Chr6:45977536-45977558   | 5 | RNA | GGCCGAGGTCGACTACCGGNNRG   | aCCaAGG-CGAGgtCCGCGAG      | + | 5 | 2 | 0 | 4.96 | 2.48 |
| Chr5:206529952-206529974 | 4 | RNA | GGCCGAGGTCGACTACCGGNNRG   | GgcGGRGTaGc-CCGCGCAG       | + | 5 | 2 | 0 | 4.96 | 2.48 |
| Chr1:94666673-94666695   | 3 | RNA | GGCCGAGGTCGACTACCGGNNRG   | GGC-AGGcCGtGcACCGCGGG      | + | 4 | 2 | 0 | 4.96 | 2.48 |
| Chr6:127441781-127441803 | 5 | RNA | GGCCGAGGTCGACTACCGGNNRG   | GGCaAGG-GaCaACtCGCGGG      | + | 4 | 2 | 0 | 4.96 | 2.48 |
| Chr2:164236196-164236218 | 5 | RNA | GGCCGAGGTCGACTACCGGNNRG   | GAcCG-GGTCTGtCaACtGGCGGG   | + | 4 | 1 | 0 | 4.96 | 2.48 |
| Chr1:149384055-149384077 | 5 | RNA | GGCCGAGGTCGACTACCGGNNRG   | GGGCGAGGtGG-GaACtGgaAGG    | + | 5 | 2 | 0 | 4.96 | 2.48 |
| Chr1:137801723-137801745 | 5 | RNA | GGCCGAGGTCGACTACCGGNNRG   | GtCCGTGT-ACaCCAGGaAG       | + | 5 | 2 | 0 | 4.96 | 2.48 |
| Chr8:151879708-151879730 | 2 | RNA | GGCCGAGGTCGACTACCGGNNRG   | GaGCGAGgGaTACgGCGAG        | + | 5 | 2 | 0 | 4.96 | 2.48 |
| Chr4:15127855-15127877   | 4 | RNA | GGCCGAGGTCGACTACCGGNNRG   | tG-GAGGAGTgAGtCaCtCGCTAG   | + | 5 | 2 | 0 | 4.96 | 2.48 |
| Chr1:263810281-26381050  | 2 | RNA | GGCCGAGGTCGACTACCGGNNRG   | GGCCGAGGTCGACTACCGGNNRG    | + | 5 | 2 | 0 | 4.96 | 2.48 |
| Chr9:21156229-21156251   | 2 | RNA | GGCCGAGGTCGACTACCGGNNRG   | G-aCGGTCGCaCaAGgCGCGGG     | + | 5 | 1 | 0 | 4.96 | 2.48 |
| Chr7:31825811-31825833   | 3 | RNA | GGCCGAGGTCGACTACCGGNNRG   | GgaTgGTCGtCGc-gCCGCGGG     | - | 5 | 1 | 0 | 4.96 | 2.48 |
| Chr7:165795458-165795480 | 2 | RNA | GGCCGAGGTCGACTACCGGNNRG   | GtCGtGG-GgCTtGGCGCGAG      | + | 5 | 2 | 0 | 4.96 | 2.48 |
| Chr5:33545793-33545815   | 3 | RNA | GGCCGAGGTCGACTACCGGNNRG   | tGgTc-tGTGACTACCGCTGG      | + | 5 | 1 | 0 | 4.96 | 2.48 |
| Chr9:74121535-74121557   | 2 | RNA | GGCCGAGGTCGACTACCGGNNRG   | GGCaGtGGT-AGT-CGtGtCGAG    | - | 5 | 2 | 0 | 4.96 | 2.48 |
| Chr2:159436251-159436273 | 5 | RNA | GGCCGAGGTCGACTACCGGNNRG   | GGCCCa-CCAGcACtGtGAG       | - | 5 | 1 | 0 | 4.96 | 2.48 |
| Chr4:165980880-165980902 | 4 | RNA | GGCCGAGGTCGACTACCGGNNRG   | G-aCGGtGTCAGCaAGaGCGGG     | + | 5 | 1 | 0 | 4.96 | 2.48 |
| Chr3:214260258-214260280 | 5 | RNA | GGCCGAGGTCGACTACCGGNNRG   | GGC-HtGGGACTACCGCTGG       | + | 4 | 2 | 0 | 4.96 | 2.48 |
| Chr2:121783603-121783625 | 3 | RNA | GGCCGAGGTCGACTACCGGNNRG   | GatC-AGGcGAGctCGGCGAG      | - | 5 | 2 | 0 | 4.96 | 2.48 |
| Chr3:214892996-214893018 | 4 | RNA | GGCCGAGGTCGACTACCGGNNRG   | G-CCGCGGtGgTACTtGCGAGG     | + | 5 | 1 | 2 | 2.75 | 2.38 |
| Chr5:223273918-223273940 | 3 | RNA | GGCCGAGGTCGACTACCGGNNRG   | GGC-GAAGTCTGACaCaGCGAGG    | - | 2 | 1 | 2 | 2.75 | 2.38 |
| Chr5:176274493-176274515 | 5 | RNA | GGCCGAGGTCGACTACCGGNNRG   | GGCCAGGtGGtCT-CgGaGTGG     | - | 5 | 1 | 2 | 2.75 | 2.38 |
| Chr5:173848653-173848675 | 4 | RNA | GGCCGAGGTCGACTACCGGNNRG   | G-CCGAaGTCTaCTGtClCTGG     | + | 4 | 1 | 3 | 1.65 | 2.33 |
| Chr2:179678271-179678293 | 3 | X   | GGCCGAGGTCGACTACCGGNNRG   | GGCaAGGcCGAGcACCGCGCG      | + | 5 | 0 | 3 | 1.65 | 2.33 |
| Chr4:121416807-121416829 | 3 | DNA | GGCCGAGGTCGACTACC-GGCNNRG | GaCaGAGCaCGaCgtTcACCGCTGG  | + | 5 | 2 | 0 | 4.41 | 2.21 |
| Chr5:156821274-156821296 | 4 | RNA | GGCCGAGGTCGACTACCGGNNRG   | G-aCGGtGTCAGCaAGaGCGGG     | + | 5 | 1 | 0 | 4.41 | 2.21 |
| Chr5:160510373-160510395 | 3 | RNA | GGCCGAGGTCGACTACCGGNNRG   | G-CCGAaGTaAcACtClGTCTGG    | + | 5 | 1 | 0 | 4    |      |

|                           |           |   |     |                            |                           |   |   |   |   |      |      |
|---------------------------|-----------|---|-----|----------------------------|---------------------------|---|---|---|---|------|------|
| Chr1:26437689-26437711    | 26437695  | 4 | RNA | GGCCGAGGTCGACTACCGGNNRG    | GtCgaAGAgGCG--TACCGGaCAG  | - | 5 | 2 | 0 | 4.41 | 2.21 |
| Chr6:169692089-169692111  | 169692104 | 5 | RNA | GGCCGAGGTCGACTACCGGNNRG    | GGcAg-GcTaaCTACCaGCTAG    | + | 5 | 1 | 0 | 4.41 | 2.21 |
| Chr8:20913523-20913545    | 20913540  | 3 | DNA | GGCCGAGGTCGACTACCGG-CNNRG  | GcggGAGGTCGACTTCCGCGCGG   | + | 5 | 1 | 0 | 4.41 | 2.21 |
| Chr10:23768318-23768340   | 23768324  | 4 | RNA | GGCCGAGGTCGACTACCGGNNRG    | GGCCGAGaGaCa-TACtCGAGG    | - | 5 | 2 | 0 | 4.41 | 2.21 |
| Chr2:90292371-90292393    | 90292376  | 3 | RNA | GGCCGAGGTCGACTACCGGNNRG    | GGCCCG-GGTGTCrCaCGCGCGG   | - | 3 | 1 | 0 | 4.41 | 2.21 |
| Chr6:71306205-71306227    | 71306211  | 4 | DNA | GGCCGAGGTCGAGa-CTACCGGNNRG | GcGCaUcTcGAGTtACCGGAGG    | + | 5 | 2 | 0 | 4.41 | 2.21 |
| Chr2:16285307-16285329    | 16285325  | 2 | RNA | GGCCGAGGTCGACTACCGGNNRG    | GcCCAGGccCGAGT--CGGAGG    | + | 5 | 2 | 0 | 4.41 | 2.21 |
| Chr5:36749334-36749356    | 36749338  | 2 | RNA | GGCCGAGGTCGACTACCGGNNRG    | GaCggGAGTGCtCtACT-GggTAG  | - | 5 | 1 | 0 | 4.41 | 2.21 |
| Chr2:232550878-232550900  | 232550885 | 5 | RNA | GGCCGAGGTCGACTACCGGNNRG    | caCAAGTtGcCT-CCGCGCAG     | - | 5 | 1 | 0 | 4.41 | 2.21 |
| Chr3:104176262-104176284  | 104176269 | 5 | RNA | GGCCGAGGTCGACTACCGGNNRG    | GcCCAGGcGtCctCT-CgGtGGTG  | - | 4 | 1 | 0 | 4.41 | 2.21 |
| Chr2:210153486-210153508  | 210153493 | 5 | RNA | GGCCGAGGTCGACTACCGGNNRG    | GcCaaACTCTGcTAG--GcGGG    | - | 5 | 2 | 0 | 4.41 | 2.21 |
| Chr7:93462714-93462736    | 93462729  | 5 | RNA | GGCCGAGGTCGACTACCGGNNRG    | GGC-GaAGTCGAagACtctCCAG   | + | 5 | 1 | 0 | 4.41 | 2.21 |
| Chr2:188670649-188670671  | 188670667 | 2 | RNA | GGCCGAGGTCGACTACCGGNNRG    | GTCCG--GTtGcaACCCGgaCAG   | + | 5 | 2 | 0 | 4.41 | 2.21 |
| Chr5:119886116-119886138  | 119886134 | 2 | DNA | GGCCGAGGTCGACTACCGGNNRG    | GcCTCGGAGGTCtCTCCGGCTGG   | + | 5 | 1 | 0 | 4.41 | 2.21 |
| Chr7:65064182-65064204    | 65064200  | 2 | RNA | GGCCGAGGTCGACTACCGGNNRG    | cGCTCtGcCT-CPaCCGtGGG     | + | 5 | 2 | 0 | 4.41 | 2.21 |
| Chr7:84651792-84651814    | 84651810  | 2 | RNA | GGCCGAGGTCGACTACCGGNNRG    | GcCCGtTtCGAGTt-GaCCCG     | + | 5 | 2 | 0 | 4.41 | 2.21 |
| Chr7:101820957-101820979  | 101820963 | 4 | DNA | GGCCGAGGTCGACTACCGGNNRG    | GcCTCGGTCGACTCTCCGGCTGG   | - | 5 | 1 | 0 | 4.41 | 2.21 |
| Chr7:80303198-80303220    | 80303202  | 2 | RNA | GGCCGAGGTCGACTACCGGNNRG    | tGacGAGGTGCAC-AaCGagCGG   | - | 5 | 1 | 0 | 4.41 | 2.21 |
| Chr4:158415050-158415072  | 158415057 | 5 | RNA | GGCCGAGGTCGACTACCGGNNRG    | GAc--AGTtGgGcCaCCGgaCAG   | - | 5 | 2 | 0 | 4.41 | 2.21 |
| Chr10:26799035-26799057   | 26799042  | 5 | RNA | GGCCGAGGTCGACTACCGGNNRG    | cGCGGtGataACT-CCGCGCAG    | - | 5 | 1 | 0 | 4.41 | 2.21 |
| Chr4:222763126-222763148  | 222763131 | 3 | RNA | GGCCGAGGTCGACTACCGGNNRG    | G-aCGGtGTCGAGCaGgaCGGG    | - | 5 | 1 | 0 | 4.41 | 2.21 |
| Chr1:3169837-3169859      | 3169855   | 2 | RNA | GGCCGAGGTCGACTACCGGNNRG    | GGa--AGGcTACTACCaGCAAG    | + | 4 | 2 | 0 | 4.41 | 2.21 |
| Chr7:5224528-5224550      | 5224533   | 3 | X   | GGCCGAGGTCGACTACCGGNNRG    | GaCCGAGGTGCAGctCGGCTGG    | - | 5 | 0 | 0 | 4.41 | 2.21 |
| Chr8:13338032-13338054    | 13338037  | 3 | RNA | GGCCGAGGTCGACTACCGGNNRG    | cGTCGaAGTCGAGCaACCT-CGAG  | - | 5 | 1 | 0 | 4.41 | 2.21 |
| Chr2:154847211-154847233  | 154847228 | 3 | RNA | GGCCGAGGTCGACTACCGGNNRG    | GGCCCaAGG--GACacCacCTCGG  | + | 5 | 2 | 0 | 4.41 | 2.21 |
| Chr5:117804758-117804780  | 117804762 | 2 | DNA | GGCCGAGGTCGACTACCGGNNRG    | GcCCGAGGTCGAGTtGgGgGAG    | + | 5 | 2 | 0 | 4.41 | 2.21 |
| Chr10:24024196-24024218   | 24024200  | 2 | RNA | GGCCGAGGTCGACTACCGGNNRG    | G-aCGGtGTCGAGCaGgTCGCGG   | - | 5 | 1 | 0 | 4.41 | 2.21 |
| Chr8:45808111-45808133    | 45808127  | 2 | RNA | GGCCGAGGTCGACTACCGGNNRG    | GGCgaAGTGG--TtGcGcCGAG    | + | 5 | 2 | 0 | 4.41 | 2.21 |
| Chr6:160577612-160577634  | 160577630 | 2 | RNA | GGCCGAGGTCGACTACCGGNNRG    | aGc--tGtTCGtCaACCGGCAAG   | + | 5 | 2 | 0 | 4.41 | 2.21 |
| Chr1:28144461-28144483    | 28144477  | 4 | RNA | GGCCGAGGTCGACTACCGGNNRG    | GGgGAGTtGG--cAcTtCGAGG    | + | 4 | 2 | 0 | 4.41 | 2.21 |
| Chr4:230159861-230159883  | 230159866 | 3 | RNA | GGCCGAGGTCGACTACCGGNNRG    | GGCC--AGGTGTCtCaCTGtGGG   | - | 4 | 1 | 0 | 4.41 | 2.21 |
| Chr4:15656113-15656135    | 15656129  | 4 | RNA | GGCCGAGGTCGACTACCGGNNRG    | GGC--AGGcCGAGcActaGcCGG   | + | 5 | 2 | 0 | 4.41 | 2.21 |
| Chr4:156382348-156382370  | 156382353 | 3 | DNA | GGCCGGA-GGTGCAGTACCGGNNRG  | GGCGACGGTTCgGCaCCGaCAG    | + | 5 | 1 | 0 | 4.41 | 2.21 |
| Chr7:57927816-57927838    | 57927834  | 2 | RNA | GGCCGAGGTCGACTACCGGNNRG    | GcGCGAGGTtGCaGgaAaa--TCAG | + | 5 | 2 | 0 | 4.41 | 2.21 |
| Chr2:245947671-245947693  | 245947689 | 2 | RNA | GGCCGAGGTCGACTACCGGNNRG    | t-CGgGaGcGRTtCCGGCTGG     | + | 5 | 2 | 0 | 4.41 | 2.21 |
| Chr10:15564214-151556420  | 15564220  | 4 | RNA | GGCCGAGGTCGACTACCGGNNRG    | GcGtGAGGTCGAGCaGgCGCAAG   | - | 5 | 2 | 0 | 4.41 | 2.21 |
| Chr5:141834972-141834994  | 141834977 | 4 | RNA | GGCCGAGGTCGACTACCGGNNRG    | G-IGAGGTGCAGCaAGgGaCAG    | - | 5 | 2 | 0 | 4.41 | 2.21 |
| Chr3:22899129-22899151    | 22899145  | 4 | RNA | GGCCGAGGTCGACTACCGGNNRG    | GTCCG--GTtGCaACCCGgaCAG   | + | 5 | 2 | 0 | 4.41 | 2.21 |
| Chr5:53466171-53466193    | 53466188  | 3 | RNA | GGCCGAGGTCGACTACCGGNNRG    | GtTCGAGTCTatCTAGT-CTGG    | + | 5 | 2 | 0 | 4.41 | 2.21 |
| Chr8:15070972-15070994    | 15070989  | 3 | RNA | GGCCGAGGTCGACTACCGGNNRG    | GGTCGAGGcCGAGT--CcgGgGG   | + | 5 | 2 | 0 | 4.41 | 2.21 |
| Chr4:214932465-214932487  | 214932482 | 3 | RNA | GGCCGAGGTCGACTACCGGNNRG    | GtGtGGTGTGCAGaC--GaAGG    | + | 5 | 2 | 0 | 4.41 | 2.21 |
| Chr1:107398153-107398175  | 107398158 | 3 | RNA | GGCCGAGGTCGACTACCGGNNRG    | GGCCGaGGTCT-CTtcttTCGG    | - | 5 | 2 | 0 | 4.41 | 2.21 |
| Chr4:18490741-18490763    | 18490745  | 2 | RNA | GGCCGAGGTCGACTACCGGNNRG    | GGaCGaCgaGCaGCaCa--CTGG   | - | 5 | 2 | 0 | 4.41 | 2.21 |
| Chr4:181163887-181163909  | 181163892 | 4 | RNA | GGCCGAGGTCGACTACCGGNNRG    | aGc--tcGgGACTACCGGCTGG    | - | 5 | 2 | 0 | 4.41 | 2.21 |
| Chr1:69266492-69266514    | 69266508  | 4 | RNA | GGCCGAGGTCGACTACCGGNNRG    | G-aCtCGGtTCGaCaCgaGCGGG   | + | 5 | 1 | 0 | 4.41 | 2.21 |
| Chr4:142113391-142113413  | 142113406 | 5 | RNA | GGCCGAGGTCGACTACCGGNNRG    | aCtCGGAGTtCG--TAgAGTCTAG  | - | 5 | 2 | 0 | 4.41 | 2.21 |
| Chr3:76297619-76297641    | 76297623  | 2 | RNA | GGCCGAGGTCGACTACCGGNNRG    | GgaCaGAGTCTGACtAa-GggtTGG | - | 5 | 1 | 0 | 4.41 | 2.21 |
| Chr1:60782069-60782091    | 60782074  | 3 | DNA | GGC-CGAGGTCGACTACCGGNNRG   | GGCTCTCaGTCTGACTACCaGcAGG | - | 3 | 1 | 0 | 4.41 | 2.21 |
| Chr5:69002134-69002156    | 69002151  | 3 | RNA | GGCCGAGGTCGACTACCGGNNRG    | GtTCGAGGT--AacctTCGCGAG   | + | 5 | 2 | 0 | 4.41 | 2.21 |
| Chr2:21783874-21783896    | 21783881  | 5 | RNA | GGCCGAGGTCGACTACCGGNNRG    | GaaCGAGTtGcCT-CGgGgGAG    | - | 5 | 1 | 0 | 4.41 | 2.21 |
| Chr4:979278-979300        | 979283    | 3 | RNA | GGCCGAGGTCGACTACCGGNNRG    | GGaCaAcGaGAGCaC--CGCGG    | - | 5 | 2 | 0 | 4.41 | 2.21 |
| Chr2:133539387-133539409  | 133539402 | 5 | RNA | GGCCGAGGTCGACTACCGGNNRG    | caCAAGTtGcCT-CCGCGCAG     | + | 5 | 1 | 0 | 4.41 | 2.21 |
| Chr2:77850122-77850144    | 77850137  | 5 | RNA | GGCCGAGGTCGACTACCGGNNRG    | GGC--AGGcaAActCCGCGCGG    | + | 5 | 2 | 0 | 4.41 | 2.21 |
| Chr5:108160504-108160526  | 108160522 | 2 | RNA | GGCCGAGGTCGACTACCGGNNRG    | G-CGAGGtGAGGcCaGCaCAG     | + | 5 | 2 | 0 | 4.41 | 2.21 |
| Chr1:199867954-199867976  | 199867961 | 5 | RNA | GGCCGAGGTCGACTACCGGNNRG    | GGC-GtGcGcTGAaactCCGCGCGG | + | 5 | 1 | 0 | 4.41 | 2.21 |
| Chr2:178852051-178852073  | 178852058 | 5 | RNA | GGCCGAGGTCGACTACCGGNNRG    | GcCCGAGGTCGACTACCGGNNRG   | - | 5 | 2 | 0 | 4.41 | 2.21 |
| Chr4:183543935-183543957  | 183543950 | 5 | RNA | GGCCGAGGTCGACTACCGGNNRG    | GGCCGAGGTCG--ggCgaGgCGG   | - | 5 | 2 | 0 | 4.41 | 2.21 |
| Chr2:81903156-81903178    | 81903173  | 3 | RNA | GGCCGAGGTCGACTACCGGNNRG    | GGCgGAGGTGG--TtGcGsaGAG   | + | 5 | 2 | 0 | 4.41 | 2.21 |
| Chr9:89455202-89455224    | 89455207  | 3 | RNA | GGCCGAGGTCGACTACCGGNNRG    | GggggaGtAG--TACCgCGCAGG   | - | 5 | 2 | 0 | 4.41 | 2.21 |
| Chr8:121283895-121283917  | 121283900 | 3 | RNA | GGCCGAGGTCGACTACCGGNNRG    | G-IGAGGTtAaTcaACCGGtAGG   | - | 5 | 2 | 0 | 4.41 | 2.21 |
| Chr4:82989186-82989208    | 82989204  | 2 | RNA | GGCCGAGGTCGACTACCGGNNRG    | GGaCtAGGTGG--TtCaGtTGG    | + | 5 | 2 | 0 | 4.41 | 2.21 |
| Chr1:4753025-4753047      | 4753030   | 3 | RNA | GGCCGAGGTCGACTACCGGNNRG    | GaCaG-GGTTCAGCaCaaGCGGG   | - | 5 | 1 | 0 | 4.41 | 2.21 |
| Chr1:127154321-127154343  | 127154337 | 4 | RNA | GGCCGAGGTCGACTACCGGNNRG    | GcCGaAGGTCGaCaAcCaC--aAGG | + | 5 | 2 | 0 | 4.41 | 2.21 |
| Chr8:140452244-140452266  | 140452259 | 5 | RNA | GGCCGAGGTCGACTACCGGNNRG    | a-CGgGTTCAGCaCgaGCGGG     | + | 5 | 2 | 0 | 4.41 | 2.21 |
| Chr2:147367339-147367361  | 147367354 | 5 | RNA | GGCCGAGGTCGACTACCGGNNRG    | GtGcGAGTCTCGgtTtA--GgaAGG | - | 5 | 2 | 0 | 4.41 | 2.21 |
| Chr9:100659636-100659658  | 100659652 | 2 | RNA | GGCCGAGGTCGACTACCGGNNRG    | GGCCGAGGTCGACTACCGGNNRG   | - | 5 | 2 | 0 | 4.41 | 2.21 |
| Chr2:85713475-85713497    | 85713491  | 4 | RNA | GGCCGAGGTCGACTACCGGNNRG    | tG--GAGgAGGCaGAGCtGCTGG   | + | 5 | 2 | 0 | 4.41 | 2.21 |
| Chr8:60988167-60988189    | 60988173  | 4 | RNA | GGCCGAGGTCGACTACCGGNNRG    | T-CGgGsaGcGRTtCCGCTGG     | - | 5 | 2 | 0 | 4.41 | 2.21 |
| Chr5:181078453-181078475  | 181078457 | 2 | RNA | GGCCGAGGTCGACTACCGGNNRG    | GcGgGAGGTGG--TtGcGsaGAG   | - | 5 | 2 | 0 | 4.41 | 2.21 |
| Chr5:45229043-45229065    | 45229060  | 3 | RNA | GGCCGAGGTCGACTACCGGNNRG    | cGgGAGcT--AaTACtGCGCCAG   | + | 5 | 2 | 0 | 4.41 | 2.21 |
| Chr3:229193108-229193130  | 229193113 | 3 | RNA | GGCCGAGGTCGACTACCGGNNRG    | GGC--tcGgGACTACCGGCTGG    | - | 4 | 2 | 0 | 4.41 | 2.21 |
| Chr4:6514333-6514355      | 6514340   | 5 | RNA | GGCCGAGGTCGACTACCGGNNRG    | CaCAAGTtGcCT-CCGCGCAG     | - | 5 | 1 | 0 | 4.41 | 2.21 |
| Chr9:99959380-99959402    | 99959397  | 3 | RNA | GGCCGAGGTCGACTACCGGNNRG    | GGaCaAGTGG--TtCaGtTGG     | + | 5 | 2 | 0 | 4.41 | 2.21 |
| Chr2:234019439-234019461  | 234019457 | 2 | RNA | GGCCGAGGTCGACTACCGGNNRG    | cGtGcAGGTTCGAC--GgGsaGAG  | + | 5 | 2 | 0 | 4.41 | 2.21 |
| Chr10:147367339-147367361 | 147367354 | 5 | RNA | GGCCGAGGTCGACTACCGGNNRG    | G-CGgAGTtCaGCaGAGCGGG     | + | 5 | 2 | 0 | 4.41 | 2.21 |
| Chr5:10768350-10768372    | 10768368  | 2 | RNA | GGCCGAGGTCGACTACCGGNNRG    | GcCCGAGGTCGACTACCGGNNRG   | - | 5 | 2 | 0 | 4.41 | 2.21 |
| Chr2:126302922-126302944  | 126302938 | 4 | RNA | GGCCGAGGTCGACTACCGGNNRG    | G-CGgGtGTCGACaGgGCGGG     | + | 5 | 1 | 0 | 4.41 | 2.21 |
| Chr5:138518702-138518724  | 138518717 | 5 | RNA | GGCCGAGGTCGACTACCGGNNRG    | GtGtGtGgGtGtA--ACCGCGCGG  | + | 5 | 2 | 0 | 4.41 | 2.21 |
| Chr9:58193135-58193157    | 58193153  | 2 | DNA | GGCCGAGGT--GCACTACCGGNNRG  | GGCCaAGTATTCAGaAgCaGCAAG  | + | 5 | 2 | 0 | 4.41 | 2.21 |
| Chr1:33043023-33043045    | 33043040  | 3 | RNA | GGCCGAGGTCGACTACCGGNNRG    | tGacGAGaTCAaCaG--GGCTAG   | + | 5 | 2 | 0 | 4.41 | 2.21 |
| Chr8:100063800-100063822  | 100063815 | 5 | RNA | GGCCGAGGTCGACTACCGGNNRG    | caCAAGTtGcCT-CCGCGCAG     | + | 5 | 1 | 0 | 4.41 | 2.21 |
| Chr7:66275684-66275706    | 66275689  | 3 | RNA | GGCCGAGGTCGACTACCGGNNRG    | GcCtctTCGACT-CCGCGCAAG    | - | 5 | 1 | 0 | 4.41 | 2.21 |
| Chr2:33024235-33024257    | 33024241  | 4 | RNA | GGCCGAGGTCGACTACCGGNNRG    | G-aCGGtGTCGAGCaGgaGCGGG   | - | 5 | 1 | 0 | 4.41 | 2.21 |
| Chr5:50647281-50647303    | 50647299  | 3 | RNA | GGCCGAGGTCGACTACCGGNNRG    | GGaCGAGGtGgG--cAaCGCGAG   | + | 5 | 2 | 0 | 4.41 | 2.21 |
| Chr4:7571845-7571867      | 7571862   | 3 | RNA | GGCCGAGGTCGACTACCGGNNRG    | GGC--tcGgGcCaCtctCCGCGGG  | + | 5 | 2 | 0 | 4.41 | 2.21 |
| Chr8:100462307-10046259   | 10046251  | 5 | RNA | GGCCGAGGTCGACTACCGGNNRG    | tGtCCGAGGTCGACTACCGGNNRG  | - | 5 | 2 | 0 | 4.41 | 2.21 |
| Chr8:25433199-25433221    | 25433217  | 2 | DNA | GGCCGAGGTCGAC-TACCGGNNRG   | cGCGAGcCTCGAGcggCCGCGCGG  | + | 4 | 1 | 0 | 4.41 | 2.21 |
| Chr8:7676194-7676216      | 7676211   | 3 | RNA | GGCCGAGGTCGACTACCGGNNRG    | GGaGAGGTtGAC--CTtAGGgG    | + | 5 | 2 | 0 | 4.41 | 2.21 |
| Chr4:174694702-174694724  | 174694718 | 4 | RNA | GGCCGAGGTCGACTACCGGNNRG    | G-CCGgGTCGtCTcGtGgGtCAG   | + | 5 | 1 | 0 | 4.41 | 2.21 |
| Chr8:14624935-14624957    | 14624951  | 4 | RNA | GGCCGAGGTCGACTACCGGNNRG    | G-aCGGtGTCGAGCaCaGgaGCGGG | + | 5 | 1 | 0 | 4.41 | 2.21 |
| Chr10:146259686-146259708 | 146259691 | 3 | RNA | GGCCGAGGTCGACTACCGGNNRG    | GGGcGAGCaGCaCGggC--GCCAG  | - | 4 | 2 | 0 | 4.41 | 2.21 |
| Chr2:126177717-126177739  | 126177735 | 2 | DNA | GGCCGAGGTCGACT-ACCGGNNRG   | GtGtGAGGAGcACTGACaGtGtGGG | + | 5 | 1 | 0 | 4.41 | 2    |

|                           |           |   |     |                           |                           |   |   |   |   |      |      |
|---------------------------|-----------|---|-----|---------------------------|---------------------------|---|---|---|---|------|------|
| Chr5:10008881-10008903    | 10008898  | 3 | RNA | GGCCGAGGTCGACTACCGGNNRG   | GGCCacGGTgG-cgCCGCGAG     | + | 5 | 2 | 4 | 0.00 | 2.00 |
| Chr6:124220122-124220144  | 124220129 | 5 | RNA | GGCCGAGGTCGACTACCGGNNRG   | GGC-HtGcgGATtACCGGCTGG    | - | 5 | 2 | 4 | 0.00 | 2.00 |
| Chr6:6765948-67659470     | 67659465  | 3 | RNA | GGCCGAGGTCGACTACCGGNNRG   | CaCaAGcTGCAG-cCGCGGAG     | + | 5 | 1 | 4 | 0.00 | 2.00 |
| Chr6:134674774-134674796  | 134674791 | 3 | DNA | GGCCGAGGTCGAC-TACCGGNNRG  | GGtCGGtTCGACGTTgttGGCCGG  | + | 5 | 2 | 4 | 0.00 | 2.00 |
| Chr2:146280432-146280454  | 146280449 | 3 | RNA | GGCCGAGGTCGACTACCGGNNRG   | GtGg-AGGcCaCcttCGGCCGG    | + | 5 | 1 | 4 | 0.00 | 2.00 |
| Chr6:52117489-52117511    | 52117496  | 5 | RNA | GGCCGAGGTCGACTACCGGNNRG   | gCCCGAGGtGcT-CAGtGCGAG    | - | 4 | 1 | 4 | 0.00 | 2.00 |
| Chr7:134571105-134571127  | 134571122 | 3 | RNA | GGCCGAGGTCGACTACCGGNNRG   | t-CGGGgGcGtTCtCGGCTGG     | + | 5 | 2 | 4 | 0.00 | 2.00 |
| Chr1:182262755-182262777  | 182262762 | 5 | RNA | GGCCGAGGTCGACTACCGGNNRG   | G-CGAaGcCaCcaACtGCGAGG    | - | 5 | 2 | 4 | 0.00 | 2.00 |
| Chr8:91840490-91840512    | 91840507  | 3 | RNA | GGCCGAGGTCGACTACCGGNNRG   | G-cCGGtGGTCaCaAGcGGG      | + | 5 | 1 | 4 | 0.00 | 2.00 |
| Chr2:160145330-160145352  | 160145337 | 3 | RNA | GGCCGAGGTCGACTACCGGNNRG   | GrCCG-GrTCaACCGGaATAG     | + | 5 | 2 | 4 | 0.00 | 2.00 |
| Chr10:13123129-13123151   | 13123136  | 5 | RNA | GGCCGAGGTCGACTACCGGNNRG   | G-cCGGtGGTCaAGcGGG        | - | 5 | 1 | 4 | 0.00 | 2.00 |
| Chr7:3261505-3261527      | 3261522   | 3 | RNA | GGCCGAGGTCGACTACCGGNNRG   | GGCCGAGtGgG-TtgCcGcCAGG   | + | 5 | 2 | 4 | 0.00 | 2.00 |
| Chr1:273999940-273999962  | 273999947 | 5 | RNA | GGCCGAGGTCGACTACCGGNNRG   | GGC-tctGTGACTACGtHTGG     | - | 5 | 2 | 4 | 0.00 | 2.00 |
| Chr1:180020357-180020379  | 180020374 | 3 | RNA | GGCCGAGGTCGACTACCGGNNRG   | GaC-AGGcCaTtGAGtGGCGAC    | + | 5 | 2 | 4 | 0.00 | 2.00 |
| Chr1:129321638-129321660  | 129321645 | 5 | RNA | GGCCGAGGTCGACTACCGGNNRG   | GGtCGGtGTtG-gcCGGCTGG     | - | 5 | 2 | 4 | 0.00 | 2.00 |
| Chr2:142398122-142398144  | 142398139 | 3 | RNA | GGCCGAGGTCGACTACCGGNNRG   | GGCCGAGtGgG-gbGtGGCGG     | + | 5 | 2 | 4 | 0.00 | 2.00 |
| Chr5:101667792-101667814  | 101667799 | 5 | DNA | GGCCGAGGTCGACTACCGGNNRG   | GGCCGgGtGcGAGtGaaCCGGCGG  | - | 5 | 1 | 4 | 0.00 | 2.00 |
| Chr10:100218755-100218777 | 100218762 | 5 | RNA | GGCCGAGGTCGACTACCGGNNRG   | GG-GAGGTGCGtAGgaGTGG      | - | 5 | 2 | 4 | 0.00 | 2.00 |
| Chr1:31114334-31114356    | 31114351  | 3 | RNA | GGCCGAGGTCGACTACCGGNNRG   | GGCCGAGGg-ACcAGtGtAGCG    | + | 5 | 2 | 4 | 0.00 | 2.00 |
| Chr6:46957466-46957488    | 46957473  | 5 | RNA | GGCCGAGGTCGACTACCGGNNRG   | GGCCGACTTCG-TtgGtGcCAGG   | - | 5 | 2 | 4 | 0.00 | 2.00 |
| Chr1:124945096-124945118  | 124945103 | 5 | RNA | GGCCGAGGTCGACTACCGGNNRG   | GcGtGAGGtGACTT-GGaAGG     | + | 5 | 2 | 4 | 0.00 | 2.00 |
| Chr1:21226460-21226482    | 21226477  | 3 | RNA | GGCCGAGGTCGACTACCGGNNRG   | GtCttGGT-GaCCACCGCGGG     | + | 5 | 1 | 4 | 0.00 | 2.00 |
| Chr1:195135647-195135669  | 195135654 | 5 | DNA | GGCCGAGGTCGACTA-CCGGNNRG  | cGCaAGtGcGCcAACTCCGCGAGG  | + | 5 | 2 | 4 | 0.00 | 2.00 |
| Chr3:41464102-41464124    | 41464119  | 3 | RNA | GGCCGAGGTCGACTACCGGNNRG   | aGCaGAG-CGAaGcCGGCTGG     | + | 5 | 2 | 4 | 0.00 | 2.00 |
| Chr7:155080042-155080064  | 155080059 | 3 | RNA | GGCCGAGGTCGACTACCGGNNRG   | G-cCGGtGGTCaAGcAGcGGG     | + | 5 | 1 | 4 | 0.00 | 2.00 |
| Chr4:51933306-51933328    | 51933313  | 5 | RNA | GGCCGAGGTCGACTACCGGNNRG   | G-cCGGtGGTCGACTACCGGNNRG  | - | 5 | 1 | 4 | 0.00 | 2.00 |
| Chr10:37362083-37362105   | 37362090  | 5 | RNA | GGCCGAGGTCGACTACCGGNNRG   | GaCCGGtGGtGAC-gGgGcCAGG   | - | 4 | 1 | 4 | 0.00 | 2.00 |
| Chr8:84845651-84845683    | 84845658  | 5 | RNA | GGCCGAGGTCGACTACCGGNNRG   | GgGtGG-GGcCaACtCCGGCAG    | - | 5 | 1 | 4 | 0.00 | 2.00 |
| Chr10:136196568-136196680 | 136196665 | 5 | RNA | GGCCGAGGTCGACTACCGGNNRG   | GGC-GAGGTGAGgaACttgTGGG   | - | 5 | 1 | 4 | 0.00 | 2.00 |
| Chr4:119702439-119702461  | 119702446 | 5 | DNA | GGCCGAGGTCGACTACCG-CCNNRG | GGAaAGtGtGcTcGcAGcCGCCCGG | + | 5 | 2 | 4 | 0.00 | 2.00 |
| Chr1:86560489-86560511    | 86560506  | 3 | RNA | GGCCGAGGTCGACTACCGGNNRG   | GrCCG-GrTgcAACCGGaAG      | + | 5 | 2 | 4 | 0.00 | 2.00 |
| Chr9:58389501-58389523    | 58389508  | 5 | RNA | GGCCGAGGTCGACTACCGGNNRG   | GgGtCGAGG-GcCTcTaGCGAAG   | - | 5 | 1 | 4 | 0.00 | 2.00 |
| Chr5:11844047-11844069    | 11844064  | 3 | RNA | GGCCGAGGTCGACTACCGGNNRG   | GGAgtGAGGagGACT-CGGAGCGG  | + | 5 | 2 | 4 | 0.00 | 2.00 |
| Chr3:124078529-124078551  | 124078546 | 3 | RNA | GGCCGAGGTCGACTACCGGNNRG   | GaCCGAGG-CCAGcCaAaGAGG    | + | 5 | 1 | 4 | 0.00 | 2.00 |
| Chr3:205364199-205364221  | 205364206 | 5 | RNA | GGCCGAGGTCGACTACCGGNNRG   | GtaCGRGtGtG-GrTCGCGTAA    | - | 5 | 2 | 4 | 0.00 | 2.00 |
| Chr1:183235274-183235296  | 183235281 | 5 | RNA | GGCCGAGGTCGACTACCGGNNRG   | GGCCGAGGtGACTACCGGNNRG    | - | 5 | 1 | 4 | 0.00 | 2.00 |
| Chr1:16240986-16241008    | 16240993  | 5 | RNA | GGCCGAGGTCGACTACCGGNNRG   | G-CGGTGGTCgaGtCCGCGAG     | + | 5 | 2 | 4 | 0.00 | 2.00 |
| Chr1:262648365-262648387  | 262648382 | 3 | RNA | GGCCGAGGTCGACTACCGGNNRG   | GgGtGAGGCaCaAg-CCGcCAG    | + | 5 | 2 | 4 | 0.00 | 2.00 |
| Chr9:96047903-96047925    | 96047920  | 3 | RNA | GGCCGAGGTCGACTACCGGNNRG   | tGCaAGtGtGACTA-GrGTGG     | + | 4 | 2 | 4 | 0.00 | 2.00 |
| Chr2:180716190-180716212  | 180716207 | 3 | X   | GGCCGAGGTCGACTACCGGNNRG   | GGCCGAGGtGcAGCaCtGtGGG    | + | 5 | 0 | 4 | 0.00 | 2.00 |
| Chr3:227746244-227746266  | 227746251 | 5 | DNA | GGCCGAGGTCGACTACCGGNNRG   | aGCaAGtGtAGtACTTACcAGCCG  | + | 5 | 1 | 4 | 0.00 | 2.00 |
| Chr8:38451032-38451054    | 38451049  | 3 | DNA | GGCCGAGGTCGACTACCGGNNRG   | GgGtCGAGGGrTCcTACTGtGAtAG | + | 5 | 2 | 4 | 0.00 | 2.00 |
| Chr8:20852244-20852266    | 20852261  | 3 | RNA | GGCCGAGGTCGACTACCGGNNRG   | aGCCGAGtGtGcCT-gGGGCTGG   | + | 5 | 1 | 4 | 0.00 | 2.00 |
| Chr2:48116260-48116282    | 48116267  | 5 | DNA | GGCCGAGGTCGACTACCGGNNRG   | GGCCGAGGTCGAGCTtCGGCCCGG  | - | 2 | 1 | 4 | 0.00 | 2.00 |
| Chr1:125436389-125436411  | 125436406 | 3 | DNA | GGCCGAGGTCGACTACCGGNNRG   | GtGtCGGtGtGAGtCTgAgGCCCGG | + | 5 | 2 | 4 | 0.00 | 2.00 |
| Chr9:13275053-13275075    | 13275060  | 5 | RNA | GGCCGAGGTCGACTACCGGNNRG   | G-cCGGtGGTCGACTACCGGNNRG  | - | 5 | 1 | 4 | 0.00 | 2.00 |
| Chr7:85009248-85009270    | 85009265  | 3 | DNA | GGCCGAGGTCGACTACCGGNNRG   | GGCCGAGGtGTCGaACCCgAgAG   | + | 5 | 1 | 4 | 0.00 | 2.00 |
| Chr2:31242370-31242392    | 31242377  | 5 | RNA | GGCCGAGGTCGACTACCGGNNRG   | G-cCGGtGGTCGACaAGcGGG     | - | 5 | 1 | 4 | 0.00 | 2.00 |
| Chr4:232476389-232476411  | 232476396 | 5 | RNA | GGCCGAGGTCGACTACCGGNNRG   | GcTgGGTGGtGACAG-GGGCGG    | - | 5 | 1 | 4 | 0.00 | 2.00 |
| Chr9:93973918-93973940    | 93973935  | 3 | RNA | GGCCGAGGTCGACTACCGGNNRG   | G-cAGGtGGTCGACaAGcGGG     | + | 5 | 1 | 4 | 0.00 | 2.00 |
| Chr6:171250440-171250462  | 171250457 | 3 | RNA | GGCCGAGGTCGACTACCGGNNRG   | G-cCGGtGGTCGACaAGcGGG     | + | 5 | 1 | 4 | 0.00 | 2.00 |
| Chr4:168158943-168158965  | 168158960 | 3 | RNA | GGCCGAGGTCGACTACCGGNNRG   | GG-GrHGcgGtGtGCGGCTGG     | + | 5 | 2 | 4 | 0.00 | 2.00 |
| Chr7:19952895-19952917    | 19952902  | 5 | RNA | GGCCGAGGTCGACTACCGGNNRG   | cGatGgtGTCGACT-CCGGCGAG   | - | 5 | 1 | 4 | 0.00 | 2.00 |
| Chr8:97477095-97477117    | 97477102  | 3 | RNA | GGCCGAGGTCGACTACCGGNNRG   | G-cCGGtGGTCGACaAGcGGG     | + | 5 | 1 | 4 | 0.00 | 2.00 |
| Chr5:26300924-26300946    | 26300941  | 3 | RNA | GGCCGAGGTCGACTACCGGNNRG   | ccCCGAaGtCGAtATc-CCGG     | + | 5 | 2 | 4 | 0.00 | 2.00 |
| Chr4:18115692-18115714    | 18115699  | 3 | RNA | GGCCGAGGTCGACTACCGGNNRG   | GGC-CTtAGAGtGAGtGcCAGG    | + | 5 | 2 | 4 | 0.00 | 2.00 |
| Chr2:219757375-219757397  | 219757392 | 3 | RNA | GGCCGAGGTCGACTACCGGNNRG   | GgGtGAGtGtGCa-cgCCGCGGAG  | + | 5 | 2 | 4 | 0.00 | 2.00 |
| Chr7:158315712-158315734  | 158315719 | 5 | RNA | GGCCGAGGTCGACTACCGGNNRG   | tGCGtGtGtG-CTACCGCGCGG    | - | 5 | 2 | 4 | 0.00 | 2.00 |
| Chr2:117163140-117163162  | 117163157 | 3 | RNA | GGCCGAGGTCGACTACCGGNNRG   | GgGtCGAG-TGcGtTggCGgCGG   | + | 5 | 1 | 4 | 0.00 | 2.00 |
| Chr5:159362988-159363010  | 159363005 | 3 | RNA | GGCCGAGGTCGACTACCGGNNRG   | GggGtGAGtGgG-TAgTGGCTAG   | + | 5 | 2 | 4 | 0.00 | 2.00 |
| Chr3:86696092-86696114    | 86696109  | 3 | RNA | GGCCGAGGTCGACTACCGGNNRG   | tGAaAGtGgG-ACTACtCGCGGG   | + | 5 | 2 | 4 | 0.00 | 2.00 |
| Chr4:114353967-114353989  | 114353984 | 3 | RNA | GGCCGAGGTCGACTACCGGNNRG   | G-cCGGtGGTCGACaAGcGGG     | + | 5 | 1 | 4 | 0.00 | 2.00 |
| Chr2:15249276-15249298    | 15249293  | 3 | RNA | GGCCGAGGTCGACTACCGGNNRG   | GGC-tcGgGACTACCGtGCTGG    | + | 5 | 2 | 4 | 0.00 | 2.00 |
| Chr2:206861186-206861208  | 206861193 | 5 | RNA | GGCCGAGGTCGACTACCGGNNRG   | G-cCGGtGGTCGACaAGcGGG     | - | 5 | 1 | 4 | 0.00 | 2.00 |
| Chr7:108634793-108634815  | 108634800 | 3 | RNA | GGCCGAGGTCGACTACCGGNNRG   | G-CCGAaGtCaAGtCTGGCCCGG   | + | 5 | 1 | 4 | 0.00 | 2.00 |
| Chr10:84119066-84119088   | 84119073  | 5 | RNA | GGCCGAGGTCGACTACCGGNNRG   | GGCCGAGGtGACTACCGGNNRG    | - | 5 | 1 | 4 | 0.00 | 2.00 |
| Chr3:175881186-175881208  | 175881193 | 5 | DNA | GGCCGAGGTCGACTA-CCGGNNRG  | ctCCaAGGcCGAcAATCCGGCAGG  | + | 5 | 2 | 4 | 0.00 | 2.00 |
| Chr8:53735225-53735247    | 53735232  | 5 | RNA | GGCCGAGGTCGACTACCGGNNRG   | GGCCGAGGTCagTCtAGCGCAGG   | - | 4 | 1 | 4 | 0.00 | 2.00 |
| Chr2:48182860-48182882    | 48182867  | 5 | RNA | GGCCGAGGTCGACTACCGGNNRG   | GGC-AGGtGCACcAGcGGCGG     | - | 4 | 2 | 4 | 0.00 | 2.00 |
| Chr4:82988329-82988351    | 82988346  | 3 | RNA | GGCCGAGGTCGACTACCGGNNRG   | G-cAGGtGGTCGACaAGcGGG     | + | 5 | 1 | 4 | 0.00 | 2.00 |
| Chr5:179004863-179004885  | 179004870 | 3 | RNA | GGCCGAGGTCGACTACCGGNNRG   | GrCCGAGGCaCaAC-cCGGcGGG   | - | 5 | 1 | 4 | 0.00 | 2.00 |
| Chr5:214597217-214597239  | 214597234 | 3 | RNA | GGCCGAGGTCGACTACCGGNNRG   | G-cAGGtGGTCGACaAGcGGG     | + | 5 | 1 | 4 | 0.00 | 2.00 |
| Chr4:85349755-85349777    | 85349772  | 3 | RNA | GGCCGAGGTCGACTACCGGNNRG   | GGtGAGGtGCaA-CAcAGaGGG    | + | 5 | 2 | 4 | 0.00 | 2.00 |
| Chr5:33943533-33943555    | 33943550  | 3 | RNA | GGCCGAGGTCGACTACCGGNNRG   | aaACCGAGtGCG-gAaCGGCGGG   | + | 5 | 2 | 4 | 0.00 | 2.00 |
| Chr1:31715609-31715631    | 31715626  | 3 | DNA | GGCCGAGGTCGACTACCGGNNRG   | GGCCCGAGGTCaATAgcCGCGGG   | + | 4 | 1 | 4 | 0.00 | 2.00 |
| Chr1:13471414-13471436    | 13471431  | 5 | RNA | GGCCGAGGTCGACTACCGGNNRG   | GtGtGAGtGAGtGAGtGAGtGAGG  | + | 5 | 1 | 4 | 0.00 | 2.00 |
| Chr2:139524103-139524125  | 139524110 | 5 | RNA | GGCCGAGGTCGACTACCGGNNRG   | tGCaAGtGtGGA-AGtGGCAGG    | + | 5 | 2 | 4 | 0.00 | 2.00 |
| Chr10:23197380-23197402   | 23197387  | 5 | RNA | GGCCGAGGTCGACTACCGGNNRG   | GtCtGGTGT-GACACCGGCGGG    | - | 5 | 1 | 4 | 0.00 | 2.00 |
| Chr2:140990156-140990178  | 140990173 | 3 | RNA | GGCCGAGGTCGACTACCGGNNRG   | GgAGtGAGtGcAGCaCCG-gTAG   | + | 5 | 1 | 4 | 0.00 | 2.00 |
| Chr5:5911337-5911359      | 5911344   | 5 | RNA | GGCCGAGGTCGACTACCGGNNRG   | GgCGtGgG-CGAaTgcCGCGGG    | - | 5 | 2 | 4 | 0.00 | 2.00 |
| Chr2:46513443-46513465    | 46513460  | 3 | DNA | GGCCGAGGTCGACTACCGGNNRG   | aGCTaAGTGTGCGaCaACtCGCAGG | + | 5 | 2 | 4 | 0.00 | 2.00 |
| Chr10:131493815-131493837 | 131493822 | 5 | RNA | GGCCGAGGTCGACTACCGGNNRG   | cGtGCGAGGTCAAC-CCaAGCAGG  | - | 4 | 2 | 4 | 0.00 | 2.00 |
| Chr5:176620259-176620281  | 176620276 | 3 | X   | GGCCGAGGTCGACTACCGGNNRG   | GGAaAGGtGtGcCTAgCGGCTGG   | + | 5 | 0 | 4 | 0.00 | 2.00 |
| Chr5:80606171-80606193    | 80606178  | 5 | DNA | GGCCGAGGTCGACTACCGGNNRG   | GtGtGcGGcCAACTCaGGCCCGG   | - | 5 | 1 | 4 | 0.00 | 2.00 |
| Chr7:180498762-180498784  | 180498769 | 5 | RNA | GGCCGAGGTCGACTACCGGNNRG   | GGCCGAaAGtGAGtGtGAGtGAGG  | + | 5 | 1 | 4 | 0.00 | 2.00 |
| Chr5:33256972-33256994    | 33256979  | 3 | RNA | GGCCGAGGTCGACTACCGGNNRG   | GtGtGtGtGtGtGtGtGtGtGtGtG | + | 4 | 2 | 4 | 0.00 | 2.00 |
| Chr10:128991903-128991925 | 128991920 | 3 | RNA | GGCCGAGGTCGACTACCGGNNRG   | GGCCGAGtGCaA-AGgGgGgAG    | + | 5 | 2 | 4 | 0.00 | 2.00 |
| Chr2:34640592-34640614    | 34640599  | 5 | RNA | GGCCGAGGTCGACTACCGGNNRG   | GGCCGAGGTCGAGtGcGgACCTTGG | - | 4 | 2 | 4 | 0.00 | 2.00 |
| Chr3:351798-351820        | 351805    | 5 | RNA | GGCCGAGGTCGACTACCGGNNRG   | GGtCcAGc-GACTACtGGCTGG    | - | 4 | 2 | 4 | 0.00 | 2.00 |
| Chr1:162877173-162877195  | 162877180 | 5 | RNA | GGCCGAGGTCGACTACCGGNNRG   | GrCtHGtGcGACTTGC-CCGG     | - | 5 | 2 | 4 | 0.00 | 2.00 |
| Chr1:201320643-201320665  | 201320660 | 3 | DNA | GGCCGAGGTCGACTACCGGNNRG   | GGCCGAGGTgaAGtCTCGGCGAG   | + | 5 | 1 | 4 | 0.00 | 2.00 |
| Chr1:127874646-127874668  | 127874663 | 3 | RNA | GGCCGAGGTCGACTACCGGNNRG   | GGCaGtGtGtGCT-CCGCTAG     | + |   |   |   |      |      |

|                           |           |   |     |                       |          |                            |   |   |   |   |      |      |
|---------------------------|-----------|---|-----|-----------------------|----------|----------------------------|---|---|---|---|------|------|
| Chr3:73246765-73246787    | 73246772  | 5 | DNA | GGCCGAGGTCG-AGTACC    | GGGCGNRG | aGGCGAHTCTGGACaCgGcCTGG    | - | 5 | 1 | 4 | 0.00 | 2.00 |
| Chr4:240094536-240094558  | 240094543 | 5 | RNA | GGCCGAGGTCGACTACCGG   | CNNRG    | GaCgGGGTG-CTtgcCGGCAAG     | - | 5 | 2 | 4 | 0.00 | 2.00 |
| Chr7:147092467-147092489  | 147092474 | 5 | RNA | GGCCGAGGTCGACTACCGG   | CNNRG    | GagCGAG-TCGtCaACGtCCAG     | - | 5 | 1 | 4 | 0.00 | 2.00 |
| Chr2:123179232-123179254  | 123179239 | 5 | RNA | GGCCGAGGTCGACTACCGG   | CNNRG    | cGaCcgGGTtGgCT-CCGGCTG     | - | 5 | 2 | 4 | 0.00 | 2.00 |
| Chr4:67236174-6723696     | 6723691   | 3 | RNA | GGCCGAGGTCGACTACCGG   | CNNRG    | G-aCcgGGTCGAGcAgGcGGG      | + | 5 | 2 | 4 | 0.00 | 2.00 |
| Chr5:56289233-56289315    | 56289300  | 5 | RNA | GGCCGAGGTCGACTACCGG   | CNNRG    | GGCCGAAGTCG-AGtCaAGAG      | - | 5 | 2 | 4 | 0.00 | 2.00 |
| Chr4:8852307-8852329      | 8852334   | 3 | RNA | GGCCGAGGTCGACTACCGG   | CNNRG    | GGCCGAGGcGcGAG-gtC-GGGCGG  | + | 4 | 1 | 4 | 0.00 | 2.00 |
| Chr5:45238631-45238653    | 45238648  | 3 | RNA | GGCCGAGGTCGACTACCGG   | CNNRG    | cGgCGAGTC-AaTACGGCTGG      | + | 5 | 2 | 4 | 0.00 | 2.00 |
| Chr4:245727074-245727096  | 245727091 | 3 | RNA | GGCCGAGGTCGACTACCGG   | CNNRG    | GaCCGAGG-CGACgACaagAGG     | + | 5 | 1 | 4 | 0.00 | 2.00 |
| Chr8:47229298-47229320    | 47229315  | 3 | DNA | GGCCGAGGTCGACTACCGG   | CNNRG    | GaCgAGAGTCGAGcAGcCGCGAG    | + | 5 | 1 | 4 | 0.00 | 2.00 |
| Chr3:11648339-11648361    | 11648356  | 3 | RNA | GGCCGAGGTCGACTACCGG   | CNNRG    | GGCCG-GGTGtCTtACtAcCGGG    | + | 3 | 1 | 4 | 0.00 | 2.00 |
| Chr2:230278562-230278584  | 230278579 | 3 | RNA | GGCCGAGGTCGACTACCGG   | CNNRG    | GGC-AGGTCGgCacCAcGgAG      | + | 4 | 1 | 4 | 0.00 | 2.00 |
| Chr3:138979077-138979099  | 138979084 | 5 | DNA | GGCCGAGGTCGACTAC-CCG  | CNNRG    | GtCcaAGGTCaCgACGACGgCAG    | - | 5 | 2 | 4 | 0.00 | 2.00 |
| Chr1:45965280-45965302    | 45965297  | 3 | RNA | GGCCGAGGTCGACTACCGG   | CNNRG    | G-aCGGAGTCGACaCgagCGGG     | + | 5 | 1 | 4 | 0.00 | 2.00 |
| Chr4:15893846-15893868    | 15893853  | 5 | RNA | GGCCGAGGTCGACTACCGG   | CNNRG    | GGCCGAGGcGcCaC-cttCGCGGG   | - | 5 | 1 | 4 | 0.00 | 2.00 |
| Chr6:47055610-47055632    | 47055627  | 3 | RNA | GGCCGAGGTCGACTACCGG   | CNNRG    | GGC-AGAGTCGAGgAGtCGGCGG    | + | 4 | 1 | 4 | 0.00 | 2.00 |
| Chr2:207164952-207164974  | 207164959 | 5 | DNA | GGCCGAGGTCGACTACC-CCG | CNNRG    | GGCCGAGGcCGAGtCGAGcCGTAG   | + | 5 | 2 | 4 | 0.00 | 2.00 |
| Chr8:104457970-104457992  | 104457987 | 3 | RNA | GGCCGAGGTCGACTACCGG   | CNNRG    | GGCC-AGGTGCGtT-CHGCCAG     | + | 4 | 2 | 4 | 0.00 | 2.00 |
| Chr4:98753567-98753589    | 98753574  | 5 | RNA | GGCCGAGGTCGACTACCGG   | CNNRG    | GGCAGtGcGACT-CCGAGtAGG     | - | 5 | 1 | 4 | 0.00 | 2.00 |
| Chr4:76254052-76254074    | 76254069  | 3 | RNA | GGCCGAGGTCGACTACCGG   | CNNRG    | aGCaGgGtCGTACTAC-GGaCGG    | + | 5 | 1 | 4 | 0.00 | 2.00 |
| Chr7:146006310-146006332  | 146006327 | 3 | RNA | GGCCGAGGTCGACTACCGG   | CNNRG    | GGC-tGcgGACTACGtCGTG       | + | 5 | 2 | 4 | 0.00 | 2.00 |
| Chr9:158471032-158471054  | 158471039 | 5 | RNA | GGCCGAGGTCGACTACCGG   | CNNRG    | GGaCGAGcCGTACT-CCGGTGG     | - | 5 | 1 | 4 | 0.00 | 2.00 |
| Chr10:41765069-41765091   | 41765086  | 3 | RNA | GGCCGAGGTCGACTACCGG   | CNNRG    | tGGCGAGGtGgATtGc-HGAC      | + | 5 | 2 | 4 | 0.00 | 2.00 |
| Chr4:173972750-173972772  | 173972757 | 5 | RNA | GGCCGAGGTCGACTACCGG   | CNNRG    | GGC-tGcgGACTACCGGCTGG      | - | 4 | 2 | 4 | 0.00 | 2.00 |
| Chr9:95151495-95151517    | 95151502  | 5 | RNA | GGCCGAGGTCGACTACCGG   | CNNRG    | G-CAAGtGtCGTtGGGCGG        | + | 5 | 2 | 4 | 0.00 | 2.00 |
| Chr6:121327934-121327956  | 121327941 | 5 | DNA | GGC-CAAGGTCGACTACCGG  | CNNRG    | GGCTCGAGGTCaCgAGtCGGCGG    | + | 4 | 2 | 4 | 0.00 | 2.00 |
| Chr3:13588918-135889240   | 135889235 | 3 | RNA | GGCCGAGGTCGACTACCGG   | CNNRG    | G-aCGGGTCGAGcAgCaGCGGG     | + | 5 | 1 | 4 | 0.00 | 2.00 |
| Chr7:74906280-74906302    | 74906297  | 3 | RNA | GGCCGAGGTCGACTACCGG   | CNNRG    | GGaCAGGTCG-TCtCaGtGG       | + | 5 | 2 | 4 | 0.00 | 2.00 |
| Chr5:5979307-5979329      | 5979324   | 3 | RNA | GGCCGAGGTCGACTACCGG   | CNNRG    | GgC-IGGtHttTACCgGCTGG      | + | 5 | 2 | 4 | 0.00 | 2.00 |
| Chr10:48203183-48203205   | 48203190  | 5 | DNA | GGCCGAGGTCGACT-ACC    | GGCNRG   | GGCCGAGGcGgAGtCGAGtGGCGG   | + | 5 | 2 | 4 | 0.00 | 2.00 |
| Chr10:123821326-123821348 | 123821343 | 3 | DNA | GGC-CGAGGTCGACTACCGG  | CNNRG    | GtCTGgGAGtGtCTtCCGGCTGG    | + | 5 | 1 | 4 | 0.00 | 2.00 |
| Chr5:39492879-39492901    | 39492886  | 5 | RNA | GGCCGAGGTCGACTACCGG   | CNNRG    | GGtCGAGGcGgCGcCGGtGAG      | - | 5 | 1 | 4 | 0.00 | 2.00 |
| Chr7:73447433-73447455    | 73447450  | 5 | RNA | GGCCGAGGTCGACTACCGG   | CNNRG    | GGC-IGGGTCGAggACtGGCGAG    | + | 4 | 1 | 4 | 0.00 | 2.00 |
| Chr8:47501040-47501062    | 47501047  | 5 | RNA | GGCCGAGGTCGACTACCGG   | CNNRG    | GGC-GRGGTCGAggACtGGAGG     | - | 5 | 1 | 4 | 0.00 | 2.00 |
| Chr1:306408702-306408724  | 306408709 | 5 | RNA | GGCCGAGGTCGACTACCGG   | CNNRG    | GGCCCGAGGcGg-AtCcttGGGCTGG | - | 4 | 1 | 4 | 0.00 | 2.00 |
| Chr10:133023444-133023466 | 133023451 | 5 | RNA | GGCCGAGGTCGACTACCGG   | CNNRG    | GGtCaAGGTCGAC-CTtGGCGG     | - | 4 | 2 | 4 | 0.00 | 2.00 |
| Chr10:67597707-67597729   | 67597724  | 5 | RNA | GGCCGAGGTCGACTACCGG   | CNNRG    | GGAaAGAGtGGA-AGcGGCTGG     | + | 5 | 1 | 4 | 0.00 | 2.00 |
| Chr4:83768393-83768415    | 83768410  | 3 | RNA | GGCCGAGGTCGACTACCGG   | CNNRG    | G-CCGAGTCTCGtTtCaGtCGG     | + | 5 | 1 | 4 | 0.00 | 2.00 |
| Chr2:234081573-234081595  | 234081580 | 5 | RNA | GGCCGAGGTCGACTACCGG   | CNNRG    | GgGCGAG-CCgtcCaGgCGGG      | - | 5 | 2 | 4 | 0.00 | 2.00 |
| Chr2:159986500-159986522  | 159986517 | 3 | RNA | GGCCGAGGTCGACTACCGG   | CNNRG    | a-CCgGGTCGAGcAGcAGcCGG     | + | 5 | 2 | 4 | 0.00 | 2.00 |
| Chr5:202419688-202419710  | 202419695 | 5 | RNA | GGCCGAGGTCGACTACCGG   | CNNRG    | GGCCCGAGcCGg-TgCaAGgAAG    | - | 5 | 1 | 4 | 0.00 | 2.00 |
| Chr4:77960690-77960712    | 77960707  | 3 | RNA | GGCCGAGGTCGACTACCGG   | CNNRG    | G-aCGGGTCGACaCgAGcGGG      | + | 5 | 1 | 4 | 0.00 | 2.00 |
| Chr1:168924929-168924951  | 168924936 | 5 | RNA | GGCCGAGGTCGACTACCGG   | CNNRG    | GGCCGgGcAGcAGcAG-CCtGG     | - | 5 | 2 | 4 | 0.00 | 2.00 |
| Chr9:47542762-47542784    | 47542779  | 5 | RNA | GGCCGAGGTCGACTACCGG   | CNNRG    | GGaCGAAGcCGA-ActaGCGG      | + | 5 | 2 | 4 | 0.00 | 2.00 |
| Chr10:58657433-58657455   | 58657440  | 5 | RNA | GGCCGAGGTCGACTACCGG   | CNNRG    | GtGgCGAGtCTtCtCT-CCGgGGG   | - | 5 | 2 | 4 | 0.00 | 2.00 |
| Chr5:45429843-45429865    | 45429850  | 5 | DNA | GGCCGAGGTCGACTACCGG   | CNNRG    | GGCCGAGGTCGtCTtCGGAGG      | + | 5 | 1 | 4 | 0.00 | 2.00 |
| Chr3:25236118-25236140    | 25236135  | 3 | RNA | GGCCGAGGTCGACTACCGG   | CNNRG    | GgGc-AGGcCaACcCTCGGCTGG    | + | 5 | 1 | 4 | 0.00 | 2.00 |
| Chr6:82232717-82232739    | 82232724  | 5 | RNA | GGCCGAGGTCGACTACCGG   | CNNRG    | GtCCGAGG-GACTAHTGAGAG      | - | 5 | 2 | 4 | 0.00 | 2.00 |
| Chr8:149818340-149818362  | 149818347 | 5 | RNA | GGCCGAGGTCGACTACCGG   | CNNRG    | GtCCGcGg-GataACGGCGAGG     | - | 5 | 2 | 4 | 0.00 | 2.00 |
| Chr6:98053960-98053982    | 98053977  | 3 | RNA | GGCCGAGGTCGACTACCGG   | CNNRG    | GGC-HGcgGACTACCGGCTGG      | + | 4 | 2 | 4 | 0.00 | 2.00 |
| Chr3:71561986-71562008    | 71562003  | 3 | RNA | GGCCGAGGTCGACTACCGG   | CNNRG    | GgCtGcgGgGtGACTA-GGtTGG    | + | 5 | 2 | 4 | 0.00 | 2.00 |
| Chr1:76772416-76772438    | 76772433  | 3 | RNA | GGCCGAGGTCGACTACCGG   | CNNRG    | GGtCCGtGcCGAGtTCGCGGGG     | + | 4 | 1 | 4 | 0.00 | 2.00 |
| Chr6:79695220-79695242    | 79695227  | 5 | RNA | GGCCGAGGTCGACTACCGG   | CNNRG    | cGaCGAGTCGAC-CCGGTAG       | - | 5 | 2 | 4 | 0.00 | 2.00 |
| Chr4:18289886-18289888    | 18289883  | 3 | RNA | GGCCGAGGTCGACTACCGG   | CNNRG    | tCtCaGtGTC-CTACtCGAGG      | + | 5 | 2 | 4 | 0.00 | 2.00 |
| Chr1:2053434-2053436      | 20534351  | 3 | RNA | GGCCGAGGTCGACTACCGG   | CNNRG    | GGCCGAGtCTGtCTGCTCG-CCAG   | + | 5 | 1 | 4 | 0.00 | 2.00 |
| Chr1:284438276-284438298  | 284438283 | 5 | RNA | GGCCGAGGTCGACTACCGG   | CNNRG    | GGCCG-GrCaCGAGTCGACCAAG    | - | 5 | 1 | 4 | 0.00 | 2.00 |
| Chr8:27778827-27778849    | 27778834  | 5 | RNA | GGCCGAGGTCGACTACCGG   | CNNRG    | GGCaaHGAGcAGTACT-CCGCGAG   | - | 5 | 1 | 4 | 0.00 | 2.00 |
| Chr7:88047657-88047679    | 88047664  | 3 | RNA | GGCCGAGGTCGACTACCGG   | CNNRG    | GcCgAGGcCGAC-CCGCAAG       | - | 5 | 2 | 4 | 0.00 | 2.00 |
| Chr5:34883315-34883337    | 34883332  | 3 | RNA | GGCCGAGGTCGACTACCGG   | CNNRG    | GGCCAGGTCGtTAC-AaCGggGGG   | + | 5 | 1 | 4 | 0.00 | 2.00 |
| Chr10:61211015-61211037   | 61211022  | 5 | RNA | GGCCGAGGTCGACTACCGG   | CNNRG    | GCGc-GcGGTCGggAGCaGcAGG    | + | 5 | 1 | 4 | 0.00 | 2.00 |
| Chr7:48103098-48103120    | 48103115  | 3 | RNA | GGCCGAGGTCGACTACCGG   | CNNRG    | ctGtCAttC-CTACCGGCGGG      | + | 5 | 1 | 4 | 0.00 | 2.00 |
| Chr4:200397091-200397113  | 200397098 | 5 | RNA | GGCCGAGGTCGACTACCGG   | CNNRG    | GGCCGAGGcCGg-TgGgGgAAG     | - | 5 | 1 | 4 | 0.00 | 2.00 |
| Chr8:56239433-56239455    | 56239450  | 3 | RNA | GGCCGAGGTCGACTACCGG   | CNNRG    | GGCCtATtCG-ctAtCGGCAAG     | + | 5 | 2 | 4 | 0.00 | 2.00 |
| Chr4:167615394-167615416  | 167615401 | 5 | RNA | GGCCGAGGTCGACTACCGG   | CNNRG    | GGcCaAGGcACTACtGcCAGG      | - | 5 | 1 | 4 | 0.00 | 2.00 |
| Chr2:132043340-132043362  | 132043347 | 5 | RNA | GGCCGAGGTCGACTACCGG   | CNNRG    | G-aCGGTCGAGcAGcAGcGGG      | + | 5 | 1 | 4 | 0.00 | 2.00 |
| Chr4:5152769-51527696     | 51527696  | 3 | RNA | GGCCGAGGTCGACTACCGG   | CNNRG    | GtCCGAGGTCGACTACCGGAG      | + | 5 | 1 | 4 | 0.00 | 2.00 |
| Chr9:2720314-2720336      | 2720321   | 5 | RNA | GGCCGAGGTCGACTACCGG   | CNNRG    | GgGc-AGGcCaACcCTCGGCGG     | + | 4 | 2 | 4 | 0.00 | 2.00 |
| Chr4:163685203-163685225  | 163685220 | 3 | RNA | GGCCGAGGTCGACTACCGG   | CNNRG    | aGCGtGGG-CGtCattCCGGCCG    | + | 5 | 1 | 4 | 0.00 | 2.00 |
| Chr2:58624502-58624524    | 58624519  | 3 | RNA | GGCCGAGGTCGACTACCGG   | CNNRG    | GGCCAGGtGcG-TtGcCGCAGG     | + | 5 | 2 | 4 | 0.00 | 2.00 |
| Chr10:23982545-23982567   | 23982552  | 5 | RNA | GGCCGAGGTCGACTACCGG   | CNNRG    | GGCaccGGTCGtGtCTtC-CAAG    | - | 5 | 2 | 4 | 0.00 | 2.00 |
| Chr10:36872891-36872913   | 36872898  | 5 | RNA | GGCCGAGGTCGACTACCGG   | CNNRG    | GtGtAGGcCGGACG-CCGtGGG     | - | 5 | 2 | 4 | 0.00 | 2.00 |
| Chr4:102066013-102066035  | 102066020 | 5 | RNA | GGCCGAGGTCGACTACCGG   | CNNRG    | GGtCaHGtTGGCA-ACCgAGG      | - | 4 | 2 | 4 | 0.00 | 2.00 |
| Chr5:37970769-37970791    | 37970776  | 5 | RNA | GGCCGAGGTCGACTACCGG   | CNNRG    | GgGcGAGtCTGtCTAG-GGGCTGG   | - | 4 | 1 | 4 | 0.00 | 2.00 |
| Chr10:3393507-3393529     | 3393524   | 3 | RNA | GGCCGAGGTCGACTACCGG   | CNNRG    | G-aCGGGTCGACaCgagCGGG      | + | 5 | 1 | 4 | 0.00 | 2.00 |
| Chr1:43654628-43654650    | 43654635  | 5 | RNA | GGCCGAGGTCGACTACCGG   | CNNRG    | GtGgAGAGtCGt-gCGGtGAG      | - | 5 | 1 | 4 | 0.00 | 2.00 |
| Chr9:99774357-99774379    | 99774374  | 5 | RNA | GGCCGAGGTCGACTACCGG   | CNNRG    | GGCCGAGGTCGACTACCGGAG      | + | 5 | 1 | 4 | 0.00 | 2.00 |
| Chr5:70344497-70344519    | 70344504  | 5 | RNA | GGCCGAGGTCGACTACCGG   | CNNRG    | GtCCAGAGGtGAGTACT-CGAGG    | + | 5 | 2 | 4 | 0.00 | 2.00 |
| Chr4:132130720-132130742  | 132130727 | 5 | RNA | GGCCGAGGTCGACTACCGG   | CNNRG    | GtGcGAGtTGtGtCTtCC-gGGG    | - | 5 | 2 | 4 | 0.00 | 2.00 |
| Chr1:185121778-185121800  | 185121785 | 5 | RNA | GGCCGAGGTCGACTACCGG   | CNNRG    | tGtCaAGGTCGtTAC-CCGGCGG    | - | 5 | 2 | 4 | 0.00 | 2.00 |
| Chr2:210483114-210483136  | 210483131 | 3 | RNA | GGCCGAGGTCGACTACCGG   | CNNRG    | cttCAAGT-GaCACCgCGCGG      | + | 5 | 1 | 4 | 0.00 | 2.00 |
| Chr8:23101791-23101813    | 23101798  | 5 | RNA | GGCCGAGGTCGACTACCGG   | CNNRG    | GGAcCAGGTCGgggAG-CCGGG     | - | 5 | 2 | 4 | 0.00 | 2.00 |
| Chr2:126141962-126141984  | 126141969 | 5 | RNA | GGCCGAGGTCGACTACCGG   | CNNRG    | GGCCG-GTtCaAGgttGgCGGG     | - | 5 | 2 | 4 | 0.00 | 2.00 |
| Chr8:135158180-135158202  | 135158187 | 5 | RNA | GGCCGAGGTCGACTACCGG   | CNNRG    | GgGCGAGGTCGAT-CCGtGGG      | - | 5 | 1 | 4 | 0.00 | 2.00 |
| Chr7:148800280-148800302  | 148800287 | 5 | RNA | GGCCGAGGTCGACTACCGG   | CNNRG    | G-aCGAAGtGACTAGgGGCGGG     | - | 5 | 1 | 4 | 0.00 | 2.00 |
| Chr2:132033340-132033362  | 132033347 | 5 | RNA | GGCCGAGGTCGACTACCGG   | CNNRG    | GtCCG-GtTgCaCAGCGcAGG      | + | 5 | 2 | 4 | 0.00 | 2.00 |
| Chr9:112468027-112468049  | 112468034 | 5 | RNA | GGCCGAGGTCGACTACCGG   | CNNRG    | GtCCGAGGTCGACTACCGGAG      | + | 5 | 1 | 4 | 0.00 | 2.00 |
| Chr10:85028172-85028194   | 85028189  | 3 | RNA | GGCCGAGGTCGACTACCGG   | CNNRG    | GgGcG-GGcCaACcCTCGGCGG     | + | 5 | 1 | 4 | 0.00 | 2.00 |
| Chr8:53635449-53635471    | 53635456  | 3 | RNA | GGCCGAGGTCGACTACCGG   | CNNRG    | GGCCGtGGcCGA-aggCTtCGGG    | + | 5 | 1 | 4 | 0.00 | 2.00 |
| Chr1:244737668-244737690  | 244737675 | 5 | RNA | GGCCGAGGTCGACTACCGG   | CNNRG    | tG-GAGAGtGtCTACGAGtAG      | - | 5 |   |   |      |      |

|                           |   |     |                           |                            |   |   |   |   |      |      |
|---------------------------|---|-----|---------------------------|----------------------------|---|---|---|---|------|------|
| Chr8:44190575-44190597    | 4 | X   | GGCCGAGGTCGACTACCGGNNRG   | GGCCtCGGcGAgTACTGGCAGG     | - | 5 | 0 | 0 | 3.86 | 1.93 |
| Chr6:160678466-160678488  | 4 | RNA | GGCCGAGGTCGACTACCGGNNRG   | GGCCGtGGcGCTGCC-aAGG       | - | 5 | 2 | 0 | 3.86 | 1.93 |
| Chr3:74291805-74291827    | 2 | RNA | GGCCGAGGTCGACTACCGGNNRG   | GG-GtGGCTGAgtCCGGtGAG      | + | 5 | 2 | 0 | 3.86 | 1.93 |
| Chr9:18823314-18823336    | 3 | DNA | GGCC-GAGGTGCGACTACCGGNNRG | GGGCTCTGAGtTCGAtcCcaGtGAG  | - | 5 | 2 | 0 | 3.86 | 1.93 |
| Chr8:17798353-17798375    | 2 | DNA | GGCCGAGGTCGACT-ACCGGNNRG  | GGCCGAGGcCaCTCTCAACCGGcAGG | + | 5 | 2 | 0 | 3.86 | 1.93 |
| Chr1:12747576-12747598    | 3 | RNA | GGCCGAGGTCGACTACCGGNNRG   | GGcAGG-TGcAGcACCGcAG       | + | 5 | 1 | 0 | 3.86 | 1.93 |
| Chr4:155736638-155736660  | 4 | RNA | GGCCGAGGTCGACTACCGGNNRG   | GGAcAGGTCG-TcCcaGtGG       | - | 5 | 2 | 0 | 3.86 | 1.93 |
| Chr7:144874097-144874119  | 3 | RNA | GGCCGAGGTCGACTACCGGNNRG   | GtCCaAGcGAG-aACCGGCGGG     | - | 4 | 2 | 0 | 3.86 | 1.93 |
| Chr4:214892603-214892625  | 2 | RNA | GGCCGAGGTCGACTACCGGNNRG   | GtGcAGcTCGACTGc-CCAG       | - | 4 | 2 | 0 | 3.86 | 1.93 |
| Chr2:43582282-43582304    | 5 | RNA | GGCCGAGGTCGACTACCGGNNRG   | GGAcGAeTC-ActcCGCGCGG      | - | 5 | 2 | 0 | 3.86 | 1.93 |
| Chr4:111778063-111778085  | 3 | DNA | GGCCGAGGTCGACTACCG-GCNNRG | GGCCCGGgTCGcCcaCGCGCGGG    | + | 5 | 2 | 0 | 3.86 | 1.93 |
| Chr7:66574006-66574028    | 5 | RNA | GGCCGAGGTCGACTACCGGNNRG   | GGC-GtCGcAGcAaCacCAAG      | + | 5 | 2 | 0 | 3.86 | 1.93 |
| Chr7:26177613-26177635    | 4 | RNA | GGCCGAGGTCGACTACCGGNNRG   | GGCCGAGGtGgGc-agaGGCGGG    | + | 5 | 1 | 0 | 3.86 | 1.93 |
| Chr2:233522922-233522944  | 2 | DNA | GGC-CGAGGTGCGACTACCGGNNRG | GGCCTCGGGGgGtACacCGGCGGG   | - | 5 | 2 | 0 | 3.86 | 1.93 |
| Chr6:45111647-45111669    | 5 | RNA | GGCCGAGGTCGACTACCGGNNRG   | GtCGtGGcTCgACTA-GGTtGG     | + | 5 | 2 | 0 | 3.86 | 1.93 |
| Chr4:68139987-68140009    | 3 | DNA | GGCCGAGG-TcGACTACCGGNNRG  | GtAGcAGtGCTCGACTCCCGCGG    | + | 5 | 2 | 0 | 3.86 | 1.93 |
| Chr10:3395075-3395097     | 4 | RNA | GGCCGAGGTCGACTACCGGNNRG   | GGcCG-GGcCaCactCCGCGCGG    | - | 5 | 1 | 0 | 3.86 | 1.93 |
| Chr2:112130552-112130574  | 2 | RNA | GGCCGAGGTCGACTACCGGNNRG   | GGCCGAGGcGAG-AggGGaAG      | + | 5 | 2 | 0 | 3.86 | 1.93 |
| Chr2:38389569-38389591    | 4 | RNA | GGCCGAGGTCGACTACCGGNNRG   | GaCCGAGG-CGAGcAaGaaAGG     | + | 5 | 1 | 0 | 3.86 | 1.93 |
| Chr2:206036552-206036574  | 4 | RNA | GGCCGAGGTCGACTACCGGNNRG   | G-aCGGGTCGAGcAGgAGGCGG     | + | 5 | 1 | 0 | 3.86 | 1.93 |
| Chr8:95939883-95939905    | 5 | RNA | GGCCGAGGTCGACTACCGGNNRG   | cGgCGAGG-GAGgtCCGCGAG      | + | 5 | 2 | 0 | 3.86 | 1.93 |
| Chr10:31129302-31129324   | 3 | RNA | GGCCGAGGTCGACTACCGGNNRG   | GGCCGgGGgGgCT-cGgGCGCG     | - | 5 | 2 | 0 | 3.86 | 1.93 |
| Chr1:114440489-114440511  | 4 | RNA | GGCCGAGGTCGACTACCGGNNRG   | atCTGgGT-GACTgCCGCGGG      | + | 5 | 1 | 0 | 3.86 | 1.93 |
| Chr5:17147479-171474771   | 5 | RNA | GGCCGAGGTCGACTACCGGNNRG   | GGAgaGAGggGAGcAa-GGGCGG    | + | 5 | 2 | 0 | 3.86 | 1.93 |
| Chr6:133846521-133846543  | 3 | RNA | GGCCGAGGTCGACTACCGGNNRG   | GaCCCAAGcAG-GAgCGGCTGG     | + | 5 | 1 | 0 | 3.86 | 1.93 |
| Chr4:188949658-188949680  | 3 | RNA | GGCCGAGGTCGACTACCGGNNRG   | GGC-tGCGGAGTCAGCGCTGG      | + | 4 | 2 | 0 | 3.86 | 1.93 |
| Chr6:63861717-63861739    | 3 | RNA | GGCCGAGGTCGACTACCGGNNRG   | GG-tGCGGcAGgtCCGCGAG       | + | 5 | 2 | 0 | 3.86 | 1.93 |
| Chr4:70742597-70742619    | 5 | DNA | GGCCGAGGTCGACTAC-CCGNNRG  | GGGgGtGGtGtAGaTACTACGGGTAG | + | 5 | 2 | 0 | 3.86 | 1.93 |
| Chr9:87693730-87693752    | 5 | RNA | GGCCGAGGTCGACTACCGGNNRG   | GGCCGAGGgGtGcCT-CGgGCCAG   | - | 4 | 1 | 0 | 3.86 | 1.93 |
| Chr5:115279670-115279692  | 3 | RNA | GGCCGAGGTCGACTACCGGNNRG   | GaCaG-GGTGCGcAaCAGgCGGG    | - | 5 | 1 | 0 | 3.86 | 1.93 |
| Chr7:115193485-115193507  | 4 | DNA | GGCCGAGG-TcGACTACCGGNNRG  | GGCtAGGGGCTCagCAcGgGCTAG   | - | 5 | 2 | 0 | 3.86 | 1.93 |
| Chr2:117480301-117480323  | 2 | RNA | GGCCGAGGTCGACTACCGGNNRG   | GTCCG-GTgTACaACCGGacAG     | + | 5 | 2 | 0 | 3.86 | 1.93 |
| Chr7:112568374-112568396  | 5 | DNA | GGCCGAGGTCGACTA-CCGCGNNRG | ctCCaAGcGcGCAcCAATCGCGCAGG | + | 5 | 2 | 0 | 3.86 | 1.93 |
| Chr4:226154453-226154475  | 2 | RNA | GGCCGAGGTCGACTACCGGNNRG   | GGAcCGAGgGtAGaAc-GCTAG     | + | 5 | 2 | 0 | 3.86 | 1.93 |
| Chr7:100627431-100627453  | 4 | RNA | GGCCGAGGTCGACTACCGGNNRG   | ctGtAGGTCGgCT-CGGCGAG      | - | 5 | 2 | 0 | 3.86 | 1.93 |
| Chr2:184513413-184513435  | 4 | RNA | GGCCGAGGTCGACTACCG-NNRG   | GGAcGAGGcAGtGtAGcCGCTGG    | - | 5 | 2 | 0 | 3.86 | 1.93 |
| Chr5:101166180-101166202  | 4 | RNA | GGCCGAGGTCGACTACCGGNNRG   | GGC-tGCGGAGTCAGCTCGTG      | + | 5 | 2 | 0 | 3.86 | 1.93 |
| Chr6:100461764-100461786  | 2 | RNA | GGCCGAGGTCGACTACCGGNNRG   | GGAgaGgaGTaG-TACCGGCGAG    | + | 5 | 2 | 0 | 3.86 | 1.93 |
| Chr10:59328656-59328678   | 5 | RNA | GGCCGAGGTCGACTACCGGNNRG   | GGC-AGGcCGAGcActtCGCGGG    | + | 5 | 2 | 0 | 3.86 | 1.93 |
| Chr6:40894804-40894826    | 3 | DNA | GGCCGAGGTCGACTA-CCGCGNNRG | cGCAaAGcCGcAaCAATCGCGCAGG  | - | 5 | 2 | 0 | 3.86 | 1.93 |
| Chr2:130749520-130749542  | 3 | RNA | GGCCGAGGTCGACTACCGGNNRG   | GACCGAGTCGAGaTg-GaCCAG     | + | 5 | 2 | 0 | 3.86 | 1.93 |
| Chr8:148276540-148276562  | 5 | RNA | GGCCGAGGTCGACTACCGGNNRG   | GtGcGAGTtGCTtCtCC-gAGG     | + | 5 | 2 | 0 | 3.86 | 1.93 |
| Chr3:214814567-214814589  | 2 | RNA | GGCCGAGGTCGACTACCGGNNRG   | GGCCAGtGtGAG-AggGGaAG      | + | 5 | 2 | 0 | 3.86 | 1.93 |
| Chr9:8615474-8615496      | 4 | RNA | GGCCGAGGTCGACTACCGGNNRG   | GG-GGcGcCTGgACCGGCGGG      | + | 5 | 2 | 0 | 3.86 | 1.93 |
| Chr7:58208907-58208929    | 5 | RNA | GGCCGAGGTCGACTACCGGNNRG   | GAGaAGAGaTc-CTAAcGGCGGG    | + | 5 | 2 | 0 | 3.86 | 1.93 |
| Chr7:86175542-86175564    | 2 | RNA | GGCCGAGGTCGACTACCGGNNRG   | GGC-tGCGGAGTCAGCTCGTG      | + | 4 | 2 | 0 | 3.86 | 1.93 |
| Chr2:68949268-68949290    | 4 | RNA | GGCCGAGGTCGACTACCGGNNRG   | GGCCaAaT-gtCTACAGCGAGG     | + | 5 | 1 | 0 | 3.86 | 1.93 |
| Chr2:173491681-173491703  | 3 | RNA | GGCCGAGGTCGACTACCGGNNRG   | GGAgtCG-GGcCaCactCCGCTGG   | + | 5 | 1 | 0 | 3.86 | 1.93 |
| Chr3:52895550-52895572    | 3 | RNA | GGCCGAGGTCGACTACCGGNNRG   | tGCCG-GTgGAGcActtGtCCAG    | - | 5 | 2 | 0 | 3.86 | 1.93 |
| Chr1:98839477-98839499    | 3 | RNA | GGCCGAGGTCGACTACCGGNNRG   | GCGcGGTGTGAGcGt-GGcAGG     | - | 5 | 2 | 0 | 3.86 | 1.93 |
| Chr1:182626386-182626408  | 5 | RNA | GGCCGAGGTCGACTACCGGNNRG   | a-CGGGTCTGAGcAGcAGCGGG     | + | 5 | 2 | 0 | 3.86 | 1.93 |
| Chr2:146523658-146523680  | 2 | RNA | GGCCGAGGTCGACTACCGGNNRG   | tGtCtAaAGc-CTAGCGCGGG      | + | 5 | 2 | 0 | 3.86 | 1.93 |
| Chr2:172138984-172139006  | 2 | RNA | GGCCGAGGTCGACTACCGGNNRG   | GGCCGAGGcAG-ActcGtGGCTGG   | + | 5 | 1 | 0 | 3.86 | 1.93 |
| Chr2:126110818-126110840  | 2 | RNA | GGCCGAGGTCGACTACCGGNNRG   | aGggGAGaTgGACTAC-GGCTAG    | + | 5 | 1 | 0 | 3.86 | 1.93 |
| Chr4:243745475-243745497  | 3 | DNA | GGC-CGAGGTGCGACTACCGGNNRG | GaCAACCGgGTGCGAGcAGaGCGGG  | + | 5 | 2 | 0 | 3.86 | 1.93 |
| Chr1:17966036-17966058    | 2 | RNA | GGCCGAGGTCGACTACCGGNNRG   | aGCGGAGGcGAGCTA-CGaTAG     | + | 5 | 2 | 0 | 3.86 | 1.93 |
| Chr10:82334963-82334985   | 4 | RNA | GGCCGAGGTCGACTACCGGNNRG   | GGAgtCG-GGcCaCTtCCCGCGGG   | - | 4 | 1 | 0 | 3.86 | 1.93 |
| Chr2:227378348-227378370  | 2 | RNA | GGCCGAGGTCGACTACCGGNNRG   | GG-GAGGTCTGtCTGtGtAGAG     | + | 5 | 2 | 0 | 3.86 | 1.93 |
| Chr4:118394836-118394858  | 5 | RNA | GGCCGAGGTCGACTACCGGNNRG   | GtGtGcGcCTCGtCTA-GGtAGG    | + | 5 | 2 | 0 | 3.86 | 1.93 |
| Chr1:120162202-120162224  | 2 | RNA | GGCCGAGGTCGACTACCGGNNRG   | GGC-GAGGTGgAGcAGcGgtGAG    | + | 5 | 1 | 0 | 3.86 | 1.93 |
| Chr10:98826797-98826819   | 3 | DNA | GGC-CGAGGTGCGACTACCGGNNRG | GCTCTAGAGcActtCTtCCGGCTGG  | + | 5 | 1 | 0 | 3.86 | 1.93 |
| Chr1:30188569-30188591    | 5 | RNA | GGCCGAGGTCGACTACCGGNNRG   | GGC-tGCGGACTACCGGCTGG      | + | 4 | 2 | 0 | 3.86 | 1.93 |
| Chr2:88113739-88113761    | 2 | RNA | GGCCGAGGTCGACTACCGGNNRG   | GtCtAGAGGgaACT-CCGGTGG     | - | 5 | 1 | 0 | 3.86 | 1.93 |
| Chr7:72631088-72631110    | 5 | RNA | GGCCGAGGTCGACTACCGGNNRG   | GGCCGAGcCT-GcGAGcGcCTGG    | - | 5 | 1 | 0 | 3.86 | 1.93 |
| Chr7:166689941-166689963  | 4 | RNA | GGCCGAGGTCGACTACCGGNNRG   | aGCTCGAGGtGtGCT-CGGtTAG    | + | 5 | 2 | 0 | 3.86 | 1.93 |
| Chr3:70165878-70165900    | 3 | RNA | GGCCGAGGTCGACTACCGGNNRG   | GGCCGAG-GGaAGaAGGCTAG      | + | 5 | 2 | 0 | 3.86 | 1.93 |
| Chr5:211550440-211550462  | 5 | RNA | GGCCGAGGTCGACTACCGGNNRG   | GGC-aAGGTCTGAGcAGcCGaAG    | + | 5 | 1 | 0 | 3.86 | 1.93 |
| Chr2:84923420-84923442    | 5 | RNA | GGCCGAGGTCGACTACCGGNNRG   | GGCCGT-GGTCTGcCACtGCGCGGG  | + | 3 | 1 | 0 | 3.86 | 1.93 |
| Chr3:145466295-145466317  | 5 | RNA | GGCCGAGGTCGACTACCGGNNRG   | GGCCCGAaaaGAGcAt-GGcAGG    | - | 5 | 1 | 0 | 3.86 | 1.93 |
| Chr1:234790404-234790426  | 4 | RNA | GGCCGAGGTCGACTACCGGNNRG   | GtCCcGG-GataACCGGCGAGG     | - | 5 | 2 | 0 | 3.86 | 1.93 |
| Chr4:109963533-109963555  | 2 | RNA | GGCCGAGGTCGACTACCGGNNRG   | GGCGGAtcTCG-aAtCaGCAAG     | - | 5 | 2 | 0 | 3.86 | 1.93 |
| Chr7:18440241-18440263    | 5 | RNA | GGCCGAGGTCGACTACCGGNNRG   | caCAAGTtGcGCT-CCGCGCAG     | + | 5 | 2 | 0 | 3.86 | 1.93 |
| Chr1:22291976-22291998    | 4 | RNA | GGCCGAGGTCGACTACCGGNNRG   | GGCG-GGTGtGcCACtGCGCGGG    | + | 4 | 1 | 0 | 3.86 | 1.93 |
| Chr9:43305404-43305426    | 5 | RNA | GGCCGAGGTCGACTACCGGNNRG   | GtCCGA-TcGACTcAGCGGGG      | - | 5 | 2 | 0 | 3.86 | 1.93 |
| Chr2:206040861-206040883  | 4 | RNA | GGCCGAGGTCGACTACCGGNNRG   | G-CTtGgGcGAGtACTGcGcAGG    | + | 5 | 1 | 0 | 3.86 | 1.93 |
| Chr2:12143688-12143700    | 3 | RNA | GGCCGAGGTCGACTACCGGNNRG   | G-aCGGAGGTCGAGcAGcAGG      | + | 5 | 1 | 0 | 3.86 | 1.93 |
| Chr8:106126726-106126748  | 3 | RNA | GGCCGAGGTCGACTACCGGNNRG   | GtCaAGAGTTCG-TACGCGCCAG    | - | 4 | 2 | 0 | 3.86 | 1.93 |
| Chr2:2036572-2036594      | 4 | RNA | GGCCGAGGTCGACTACCGGNNRG   | GtGcAGcGTgGAG-AaCGcCAG     | - | 5 | 1 | 0 | 3.86 | 1.93 |
| Chr5:15367646-15367668    | 5 | RNA | GGCCGAGGTCGACTACCGGNNRG   | GGCCaAGGcGgCaACTAc-CGAG    | - | 5 | 1 | 0 | 3.86 | 1.93 |
| Chr2:16626963-16626985    | 2 | RNA | GGCCGAGGTCGACTACCGGNNRG   | GtCCG-GTgACaACCGGgAG       | + | 5 | 2 | 0 | 3.86 | 1.93 |
| Chr9:52520696-52520718    | 2 | DNA | GGCCGAGGT-CGACTACCGGNNRG  | GGCCAGcAGTGGcCaACTAaCGtTGG | + | 5 | 2 | 0 | 3.86 | 1.93 |
| Chr7:33158870-33158892    | 4 | X   | GGCCGAGGTCGACTACCGGNNRG   | GGAcAGcAGcGACTAGcGGtAGG    | - | 5 | 0 | 0 | 3.86 | 1.93 |
| Chr9:37991745-37991767    | 5 | RNA | GGCCGAGGTCGACTACCGGNNRG   | GtCCG-GTgTACaACCGGacAG     | - | 5 | 2 | 0 | 3.86 | 1.93 |
| Chr7:97000429-97000451    | 5 | RNA | GGCCGAGGTCGACTACCGGNNRG   | GGC-AGGcGAGcACcGtGtGGG     | + | 5 | 2 | 0 | 3.86 | 1.93 |
| Chr7:82868060-82868082    | 5 | RNA | GGCCGAGGTCGACTACCGGNNRG   | GGC-tcGgGAGTCtAGtGGCTGG    | + | 5 | 2 | 0 | 3.86 | 1.93 |
| Chr3:163802895-163803017  | 3 | DNA | GGCCGAGGTCGACTACCGGNNRG   | GG-aAGGcGAGcAATAGCGCTGG    | + | 5 | 2 | 0 | 3.86 | 1.93 |
| Chr1:107894824-107894846  | 3 | RNA | GGCCGAGGTCGACTACCGGNNRG   | GGAcAGG-aAGCTAGcGGcGGG     | - | 5 | 2 | 0 | 3.86 | 1.93 |
| Chr9:155135-155157        | 5 | RNA | GGCCGAGGTCGACTACCGGNNRG   | GGC-AGtTgGtAGgCCGCGCGG     | - | 5 | 2 | 0 | 3.86 | 1.93 |
| Chr10:101005287-101005309 | 2 | RNA | GGCCGAGGTCGACTACCGGNNRG   | GGCCGAGGgAGgAGg-GCcCCAG    | + | 5 | 2 | 0 | 3.86 | 1.93 |
| Chr5:122217141-122217163  | 3 | RNA | GGCCGAGGTCGACTACCGGNNRG   | GGC-aAGGTcCaAGcACCGGtAGG   | - | 4 | 1 | 0 | 3.86 | 1.93 |
| Chr5:79950097-79950119    | 4 | DNA | GGC-CGAGGTGCGACTACCGGNNRG | GGCTCTGgGgGtACaCCCGCGGG    | + | 5 | 2 | 0 | 3.86 | 1.93 |
| Chr2:134230735-134230757  | 3 | RNA | GGCCGAGGTCGACTACCGGNNRG   | ctCCGCGGTCA-ACCGGgGGG      | + | 5 | 2 | 0 | 3.86 | 1.93 |
| Chr2:87737890-87737912    | 2 | RNA | GGCCGAGGTCGACTACCGGNNRG   | GG-GAGGAGtGtATAGcGGCAAG    | + | 5 | 2 | 0 | 3.86 | 1.93 |
| Chr10:53575327-53575349   | 3 | RNA | GGCCGAGGTCGACTACCGGNNRG   | GGCCAAGGcGgCtCaT-GGCGAG    | - | 5 | 1 | 0 | 3.86 | 1.93 |
| Chr3:81163555-81163577    | 3 | RNA | GGCCGAGGTCGACTACCGGNNRG   | GtCaRRGGAcGc-CCGCGCAG      | - | 5 | 2 | 0 | 3.86 | 1.93 |
| Chr1:203667593-203667615  | 4 | RNA | GGCCGAGGTCGACTACCGGNNRG   | GGAgtGGTgGtGtACCGCGAG      | + | 5 | 1 | 0 | 3.86 | 1.93 |
| Chr2:211201974-211201996  | 3 | RNA | GGCCGAGGTCGACTACCGGNNRG   | GGCCG-GaaAGaATAGCTCGaAG    | + | 5 | 2 | 0 | 3.86 | 1.93 |
| Chr2:51176098-51176120    | 5 | RNA | GGCCGAGGTCGACTACCGGNNRG   | GGCCGA-TAGcCGcCGGCCCG      | + | 5 | 2 | 0 | 3.86 | 1.93 |
| Chr8:17674943-17674965    | 2 | RNA | GGCCGAGGTCGACTACCGGNNRG   | GGAgtGAGGgaGAGcA-GGgAGG    | + | 5 | 2 | 0 | 3.86 | 1.93 |
| Chr8:78435436-78435458    | 4 | DNA | GGC-CGAGGTGCGACTACCGGNNRG | GtCTGgGAGcGtCTtCCGCTGG     | - | 5 | 1 | 0 | 3.86 | 1.93 |
| Chr8:28603190-28603212    | 2 | RNA | GGCCGAGGTCGACTACCGGNNRG   | GcaAGAGG-GAGTAgGCaCAAG     | + | 5 | 2 | 0 | 3.86 | 1.93 |
| Chr5:30767483-30767505    | 2 | RNA | GGCCGAGGTCGACTACCGGNNRG   | GGC-AttcCTGAaTgCCGtGAG     | - | 5 | 2 | 0 | 3.86 | 1.93 |
| Chr2:166609198-1666092    |   |     |                           |                            |   |   |   |   |      |      |

|                           |           |   |     |                            |                            |   |   |   |   |      |      |
|---------------------------|-----------|---|-----|----------------------------|----------------------------|---|---|---|---|------|------|
| Chr2:122879933-122879955  | 122879937 | 2 | RNA | GGCCGAGGTCGACTACCGGCGNRG   | cGCC-AGGcCGactCCGGCAG      | - | 5 | 1 | 0 | 3.30 | 1.65 |
| Chr5:158999624-158999646  | 158999640 | 4 | RNA | GGCCGAGGTCGACTACCGGCGNRG   | GggAgGAGGggaGT-CCGGCCAG    | + | 5 | 2 | 0 | 3.30 | 1.65 |
| Chr10:48356902-48356924   | 48356906  | 2 | DNA | GGCCGAGGTCGACTACCG-GCNRG   | GGgGAGGTCtGtCTAcAGAGCCAG   | - | 3 | 2 | 0 | 3.30 | 1.65 |
| Chr7:135420232-135420254  | 135420237 | 3 | DNA | GGC-CGAGGTGCAGTACCGGCGNRG  | aGCTCGAGGcCGAGTgaCGGCGAG   | - | 5 | 1 | 0 | 3.30 | 1.65 |
| Chr7:31525853-31525875    | 31525859  | 4 | DNA | GGC-CGAGGTGCAGTACCGGCGNRG  | GGCGAGCGAGTCGACTcGgGTGG    | + | 5 | 2 | 0 | 3.30 | 1.65 |
| Chr2:24119474-24119496    | 24119492  | 2 | DNA | GGC-CGAGGTGCAGTACCGGCGNRG  | GGTCCGAGGTCGAGgtGtGAG      | + | 5 | 1 | 0 | 3.30 | 1.65 |
| Chr3:9102752-9102774      | 9102758   | 4 | RNA | GGCCGAGGTGCAGTACCGGCGNRG   | GgG-aAGGcCGtCTcCGGCTGG     | + | 5 | 1 | 0 | 3.30 | 1.65 |
| Chr1:249986873-249986895  | 249986889 | 4 | RNA | GGCCGAGGTGCAGTACCGGCGNRG   | GG-GAGTCAaaACCGgaAGG       | + | 5 | 2 | 0 | 3.30 | 1.65 |
| Chr2:79513821-79513843    | 79513838  | 3 | RNA | GGCCGAGGTGCAGTACCGGCGNRG   | GGCCGAGc-CaaCGATCGgaAGG    | + | 5 | 1 | 0 | 3.30 | 1.65 |
| Chr9:158828559-158828581  | 158828563 | 2 | RNA | GGCCGAGGTGCAGTACCGGCGNRG   | tG-GAGgaAGcAGACtCGCAAG     | - | 5 | 2 | 0 | 3.30 | 1.65 |
| Chr1:304064781-304064803  | 304064798 | 3 | RNA | GGCCGAGGTGCAGTACCGGCGNRG   | CGcGAGG-GaaTAcGGgaAGG      | + | 5 | 2 | 0 | 3.30 | 1.65 |
| Chr9:125811554-125811576  | 125811569 | 5 | RNA | GGCCGAGGTGCAGTACCGGCGNRG   | GgaCGAcGTgAT-CHGGCGAG      | + | 5 | 2 | 0 | 3.30 | 1.65 |
| Chr5:107175111-107175133  | 107175128 | 3 | RNA | GGCCGAGGTGCAGTACCGGCGNRG   | GtCCaAGcaCACTACC-CCAG      | + | 5 | 2 | 0 | 3.30 | 1.65 |
| Chr8:38140537-38140559    | 38140542  | 3 | RNA | GGCCGAGGTGCAGTACCGGCGNRG   | GGCCaAGGgtGCT-CgGGCTAG     | - | 5 | 1 | 0 | 3.30 | 1.65 |
| Chr4:144024909-144024931  | 144024925 | 4 | RNA | GGCCGAGGTGCAGTACCGGCGNRG   | GGCCaCtTCaCTAgCG-CAAG      | + | 5 | 1 | 0 | 3.30 | 1.65 |
| Chr7:93519602-93519624    | 93519607  | 3 | DNA | GGCCGAGGTCGAA-CTACCGGCGNRG | GGtCGAGGcCGAGTcGaaCGGAGS   | + | 4 | 2 | 0 | 3.30 | 1.65 |
| Chr5:192960636-192960658  | 192960654 | 2 | DNA | GGCCGA--GGTGCAGTACCGGCGNRG | GtCGACtGCTGaaGACTaCGGCGCAG | + | 5 | 2 | 0 | 3.30 | 1.65 |
| Chr7:16047436-16047458    | 16047443  | 5 | RNA | GGCCGAGGTGCAGTACCGGCGNRG   | GgGCGAG-CCgtgACaGGCGGG     | - | 5 | 2 | 0 | 3.30 | 1.65 |
| Chr4:143196923-143196945  | 143196941 | 2 | DNA | GGCCGAGGTCGAA-CTACCGGCGNRG | GGtCGAGtGTGAGGcAGtGGCGGG   | + | 5 | 2 | 0 | 3.30 | 1.65 |
| Chr9:69062577-69062599    | 69062595  | 2 | RNA | GGCCGAGGTGCAGTACCGGCGNRG   | GGC-1AGGcCGAggACtCGCAGG    | + | 5 | 1 | 0 | 3.30 | 1.65 |
| Chr3:7770701-7770723      | 7770718   | 3 | DNA | GGC-CGAGGTGCAGTACCGGCGNRG  | GGCT-CacGcCACTACtGGCGAG    | + | 5 | 1 | 0 | 3.30 | 1.65 |
| Chr10:121024132-121024154 | 121024136 | 2 | RNA | GGCCGAGGTGCAGTACCGGCGNRG   | GGCCGAGtCGAGTCC--tGGG      | - | 5 | 2 | 0 | 3.30 | 1.65 |
| Chr1:159291722-159291744  | 159291727 | 3 | DNA | GGCC-GAGGTGCAGTACCGGCGNRG  | GGCCCGAGGtGTgAaAgACgaCGAGG | + | 5 | 1 | 0 | 3.30 | 1.65 |
| Chr4:54536944-54536966    | 54536949  | 3 | DNA | GGCCGAGGTGCAGTACCGGCGNRG   | ttGtAGGAGcGAGTCAgGGtGGG    | + | 5 | 1 | 0 | 3.30 | 1.65 |
| Chr2:105621831-105621853  | 105621836 | 3 | RNA | GGCCGAGGTGCAGTACCGGCGNRG   | 1-CCGAcGcGTGtAGcCGGCGAG    | - | 5 | 1 | 0 | 3.30 | 1.65 |
| Chr7:37989850-37989872    | 37989866  | 4 | RNA | GGCCGAGGTGCAGTACCGGCGNRG   | GGCGAGGtGCT-CgGcCTGG       | + | 5 | 1 | 0 | 3.30 | 1.65 |
| Chr10:1696886-1696908     | 1696901   | 5 | RNA | GGCCGAGGTGCAGTACCGGCGNRG   | GcGgGcCG-CgGgGgCGGCGAG     | + | 5 | 2 | 0 | 3.30 | 1.65 |
| Chr8:132268614-132268636  | 132268620 | 4 | RNA | GGCCGAGGTGCAGTACCGGCGNRG   | GGtGgGGTgAG--cACCGgaAGG    | + | 5 | 2 | 0 | 3.30 | 1.65 |
| Chr1:155052334-155052356  | 155052349 | 5 | RNA | GGCCGAGGTGCAGTACCGGCGNRG   | GgCaGgCG-GcACaCAaaGCGGG    | + | 5 | 1 | 0 | 3.30 | 1.65 |
| Chr4:10986142-10986164    | 10986149  | 5 | DNA | GGCCGAGGTCGACTACC--GGCNRG  | GGtCGAGGTGtGtCTgCaAGGCGCAG | - | 4 | 2 | 0 | 3.30 | 1.65 |
| Chr2:72771318-72771340    | 72771334  | 4 | RNA | GGCCGAGGTGCAGTACCGGCGNRG   | GGC--tcGaaGACTACCGGCTGG    | + | 4 | 2 | 0 | 3.30 | 1.65 |
| Chr10:129636421-129636443 | 129636437 | 4 | RNA | GGCCGAGGTGCAGTACCGGCGNRG   | GcCCAGGcCGCGA-ActcGtTGG    | + | 5 | 2 | 0 | 3.30 | 1.65 |
| Chr3:103618456-103618478  | 103618474 | 2 | DNA | GGCCGAGGTGC-ACTACCGGCGNRG  | GCGcAGGgGtGTAaCAaCCaAG     | + | 5 | 1 | 0 | 3.30 | 1.65 |
| Chr2:185635696-185635718  | 185635701 | 3 | DNA | GGCCGAGGTGCAGTACCGGCGNRG   | cGCaAGGtGtGtGtCGGtGGtCGG   | - | 5 | 1 | 0 | 3.30 | 1.65 |
| Chr7:86579547-86579569    | 86579552  | 3 | DNA | GGC-CGAGGTGCAGTACCGGCGNRG  | GcCTCGgGtGtGtCTCGGCTGG     | - | 5 | 1 | 0 | 3.30 | 1.65 |
| Chr5:37641978-37642066    | 37641993  | 5 | RNA | GGCCGAGGTGCAGTACCGGCGNRG   | GGCCGAGGTCGAGTACCGGCGNRG   | + | 5 | 2 | 0 | 3.30 | 1.65 |
| Chr9:128092340-128092362  | 128092355 | 5 | RNA | GGCCGAGGTGCAGTACCGGCGNRG   | GCGc-AGGtGGT-TCcCaGtTGG    | + | 5 | 2 | 0 | 3.30 | 1.65 |
| Chr8:139942205-139942227  | 139942222 | 3 | RNA | GGCCGAGGTGCAGTACC--GGCNRG  | GGtCGAGGTGCTGgaCaGAGGCGCAG | + | 5 | 2 | 0 | 3.30 | 1.65 |
| Chr3:4825390-4825412      | 4825396   | 4 | DNA | GGCCGAGGTGCAGTACCGGCGNRG   | GcGGcAGGcCGAC--CCGtCAAG    | - | 5 | 2 | 0 | 3.30 | 1.65 |
| Chr7:62390275-62390297    | 62390291  | 4 | RNA | GGCCGAGGTGCAGTACCGGCGNRG   | GGGcGAGcCTCGcCaC-GGCAAG    | + | 4 | 2 | 0 | 3.30 | 1.65 |
| Chr8:153505433-153505455  | 153505438 | 3 | RNA | GGCCGAGGTGCAGTACCGGCGNRG   | GGtCGAGTc-CTcCCgCGGG       | - | 4 | 2 | 0 | 3.30 | 1.65 |
| Chr8:119767152-119767174  | 119767169 | 3 | RNA | GGCCGAGGTGCAGTACCGGCGNRG   | GgGtAGGtGtGAGCa--GGCGGG    | + | 4 | 2 | 0 | 3.30 | 1.65 |
| Chr1:73387788-73387810    | 73387795  | 5 | RNA | GGCCGAGGTGCAGTACCGGCGNRG   | G-aCGgGTCCTGCaCaGgaGCGGG   | - | 5 | 1 | 0 | 3.30 | 1.65 |
| Chr7:48100604-48100626    | 48100620  | 4 | RNA | GGCCGAGGTGCAGTACCGGCGNRG   | G-aCGgGTCCTGCaCaGgaGCGGG   | + | 5 | 1 | 0 | 3.30 | 1.65 |
| Chr2:44995534-44995556    | 44995552  | 2 | RNA | GGCCGAGGTGCAGTACCGGCGNRG   | GGCCCGA-1wGcCAcCaCGCGCGG   | + | 4 | 2 | 0 | 3.30 | 1.65 |
| Chr8:15801857-15801879    | 15801872  | 5 | RNA | GGCCGAGGTGCAGTACCGGCGNRG   | GGCCGAGGTGCAGTACCGGCGNRG   | + | 5 | 2 | 0 | 3.30 | 1.65 |
| Chr2:115610922-115610944  | 115610927 | 3 | RNA | GGCCGAGGTGCAGTACCGGCGNRG   | wGc--AGGtGtGAGTCGgaGgaAG   | + | 5 | 2 | 0 | 3.30 | 1.65 |
| Chr5:159188090-159188112  | 159188097 | 5 | RNA | GGCCGAGGTGCAGTACCGGCGNRG   | GGCCGAGGcGcGg-TgCaGgAG     | + | 5 | 1 | 0 | 3.30 | 1.65 |
| Chr2:108882451-108882473  | 108882467 | 4 | DNA | GGCCGAGGTGCAGT--ACCGGCGNRG | ttCCGAGGcCGACTCCtCCGtCGAG  | + | 5 | 2 | 0 | 3.30 | 1.65 |
| Chr4:120350896-120350918  | 120350914 | 2 | RNA | GGCCGAGGTGCAGTACCGGCGNRG   | GGCCGtGtTC-ACcgCGtGCGG     | + | 5 | 1 | 0 | 3.30 | 1.65 |
| Chr3:39270810-39270832    | 39270815  | 3 | DNA | GGCCGAGGTGCAGTACCGGCGNRG   | GgGtGAGaCaGACTGACCgCGGGG   | - | 5 | 1 | 0 | 3.30 | 1.65 |
| Chr6:29714832-29714854    | 29714850  | 2 | RNA | GGCCGAGGTGCAGTACCGGCGNRG   | GGGgAGGcGgCG--TACaGaCGAG   | + | 5 | 2 | 0 | 3.30 | 1.65 |
| Chr5:199787056-199787078  | 199787060 | 2 | RNA | GGCCGAGGTGCAGTACCGGCGNRG   | GGCCGAGGcGcGg-TgGcGgaAG    | + | 5 | 1 | 0 | 3.30 | 1.65 |
| Chr8:139103175-139103197  | 139103182 | 5 | RNA | GGCCGAGGTGCAGTACCGGCGNRG   | GGGcAaAGTGG--TtGgCGCGAG    | - | 5 | 2 | 0 | 3.30 | 1.65 |
| Chr3:154781338-154781360  | 154781356 | 2 | RNA | GGCCGAGGTGCAGTACCGGCGNRG   | G-CGAGGAGcGgCattCGcCCGG    | + | 5 | 2 | 0 | 3.30 | 1.65 |
| Chr1:18438664-18438686    | 18438670  | 4 | RNA | GGCCGAGGTGCAGTACCGGCGNRG   | GGtCGAGGTGG--TtGAGTACCGG   | + | 5 | 2 | 0 | 3.30 | 1.65 |
| Chr8:153051992-153051924  | 153051918 | 4 | RNA | GGCCGAGGTGCAGTACCGGCGNRG   | GGCCGAGGcCGAG--CCGgaAGG    | + | 5 | 2 | 0 | 3.30 | 1.65 |
| Chr2:9239214-9239236      | 92392318  | 2 | RNA | GGCCGAGGTGCAGTACCGGCGNRG   | GgGcG-GGcCAcCtCTCGGCGGG    | - | 5 | 1 | 0 | 3.30 | 1.65 |
| Chr7:135879138-135879160  | 135879144 | 4 | DNA | GGC-CGAGGTGCAGTACCGGCGNRG  | GGCTCGgaGAGGtGtCTtCGGCTGG  | - | 5 | 1 | 0 | 3.30 | 1.65 |
| Chr9:15295368-15295390    | 15295374  | 4 | RNA | GGCCGAGGTGCAGTACCGGCGNRG   | GGC--tGctGACTACCGGCTGG     | - | 4 | 2 | 0 | 3.30 | 1.65 |
| Chr5:168752859-168752881  | 168752865 | 4 | RNA | GGCCGAGGTGCAGTACCGGCGNRG   | tGaaCGAGGaCGAagAC-GGCAAG   | - | 5 | 1 | 0 | 3.30 | 1.65 |
| Chr4:68993740-68993762    | 68993755  | 5 | RNA | GGCCGAGGTGCAGTACCGGCGNRG   | aGCaAGGcGcGA--AgTCaCCAG    | + | 5 | 2 | 0 | 3.30 | 1.65 |
| Chr2:1392809-1392831      | 1392825   | 4 | RNA | GGCCGAGGTGCAGTACCGGCGNRG   | G-aCGAGGTGCAGcAGaGCGGGG    | + | 4 | 2 | 0 | 3.30 | 1.65 |
| Chr6:169119644-169119666  | 169119649 | 3 | RNA | GGCCGAGGTGCAGTACCGGCGNRG   | GcGcAGGcCGAC--CCGtGAGC     | + | 5 | 2 | 0 | 3.30 | 1.65 |
| Chr2:90107750-90107772    | 90107756  | 4 | RNA | GGCCGAGGTGCAGTACCGGCGNRG   | G-aCGGgGTCGAGcAGgaGCGGG    | - | 5 | 1 | 0 | 3.30 | 1.65 |
| Chr6:84118713-84118735    | 84118717  | 2 | RNA | GGCCGAGGTGCAGTACCGGCGNRG   | GGCCGAGGTGCAGTACCGGCGNRG   | + | 5 | 2 | 0 | 3.30 | 1.65 |
| Chr1:259601813-259601835  | 259601829 | 4 | DNA | GGCCGAGG--TCGACTACCGGCGNRG | GcCgaAGcCATCGtCTCCGgCAG    | + | 5 | 1 | 0 | 3.30 | 1.65 |
| Chr10:149762722-149762744 | 149762737 | 5 | DNA | GGCCG--AGGTGCAGTACCGGCGNRG | GGCCGtGAtGgGcCtCTCGGCGAG   | + | 5 | 2 | 0 | 3.30 | 1.65 |
| Chr1:79911649-79911671    | 79911667  | 2 | RNA | GGCCGAGGTGCAGTACCGGCGNRG   | GGGcGAGGcCaaTt--GGCGAG     | + | 5 | 2 | 0 | 3.30 | 1.65 |
| Chr4:142083947-142083969  | 142083963 | 4 | RNA | GGCCGAGGTGCAGTACCGGCGNRG   | GGGcAGcGaaGACTACC--CGAG    | + | 5 | 2 | 0 | 3.30 | 1.65 |
| Chr2:112183309-112183331  | 112183315 | 4 | RNA | GGCCGAGGTGCAGTACCGGCGNRG   | GGCCGAtGtGgAGTtA--GaaAG    | - | 5 | 2 | 0 | 3.30 | 1.65 |
| Chr6:148381872-148381894  | 148381887 | 5 | RNA | GGCCGAGGTGCAGTACCGGCGNRG   | GtC--tctTtGtTACCgGCGGG     | + | 5 | 2 | 0 | 3.30 | 1.65 |
| Chr6:79844790-79844812    | 79844806  | 4 | DNA | GGCCGAGGTGCAGTACCGGCGNRG   | GGCCGAGGTGCAGTtTgagctCTGG  | + | 5 | 2 | 0 | 3.30 | 1.65 |
| Chr3:76184669-76184691    | 76184687  | 2 | RNA | GGCCGAGGTGCAGTACCGGCGNRG   | GGGtGtGctt-CTaaCGGCGAG     | + | 5 | 2 | 0 | 3.30 | 1.65 |
| Chr1:69014233-69014255    | 69014249  | 4 | RNA | GGCCGAGGTGCAGTACCGGCGNRG   | aCCCGAGGtTgGc--CCGCGAG     | + | 5 | 2 | 0 | 3.30 | 1.65 |
| Chr5:14986046-14986068    | 14986062  | 4 | X   | GGCCGAGGTGCAGTACCGGCGNRG   | GGCCGAGGTCAGTACCGGCGNRG    | + | 5 | 2 | 0 | 3.30 | 1.65 |
| Chr4:34640956-34640958    | 34640950  | 5 | X   | GGCCGAGGTGCAGTACCGGCGNRG   | GGCCGAGGcCGTCACTCtGCTAG    | + | 4 | 0 | 0 | 3.30 | 1.65 |
| Chr1:14600836-14600858    | 14600843  | 5 | DNA | GGCCGAGG-CTCGACTACCGGCGNRG | GtHCGAGGTCaAGaAGCGCAAG     | - | 5 | 1 | 0 | 3.30 | 1.65 |
| Chr5:150381051-150381073  | 150381057 | 4 | RNA | GGCCGAGGTGCAGTACCGGCGNRG   | GGCCG--GTCCgGCaCTGaaCGG    | - | 5 | 2 | 0 | 3.30 | 1.65 |
| Chr8:59459813-59459835    | 59459817  | 2 | RNA | GGCCGAGGTGCAGTACCGGCGNRG   | cCGCC--GTaCTtCTCCGtGAG     | - | 5 | 2 | 0 | 3.30 | 1.65 |
| Chr5:81399374-81399396    | 81399391  | 3 | RNA | GGCCGAGGTGCAGTACCGGCGNRG   | GcCCAGGcCGAgT--CGtAGG      | + | 5 | 2 | 0 | 3.30 | 1.65 |
| Chr7:56199891-56199913    | 56199895  | 2 | RNA | GGCCGAGGTGCAGTACCGGCGNRG   | GGtCGAGGtGgG--gttGCGGCGAG  | + | 5 | 2 | 0 | 3.30 | 1.65 |
| Chr8:27680198-27680220    | 27680215  | 3 | RNA | GGCCGAGGTGCAGTACCGGCGNRG   | GGC--AGGcCagCtCTCGGCGGG    | + | 5 | 2 | 0 | 3.30 | 1.65 |
| Chr7:60205438-60205460    | 60205442  | 2 | RNA | GGCCGAGGTGCAGTACCGGCGNRG   | aGCTGcGgGCACTACt--CTGG     | - | 5 | 2 | 0 | 3.30 | 1.65 |
| Chr2:46487787-46487809    | 46487804  | 3 | RNA | GGCCGAGGTGCAGTACCGGCGNRG   | GgaCaAGGTCG--TcCaaGtTGG    | + | 5 | 2 | 0 | 3.30 | 1.65 |
| Chr4:123650852-123650874  | 123650870 | 4 | RNA | GGCCGAGGTGCAGTACCGGCGNRG   | GaAgGtGAGTGCAG--GGtGAGAG   | + | 4 | 1 | 0 | 3.30 | 1.65 |
| Chr9:12138305-12138327    | 12138320  | 5 | RNA | GGCCGAGGTGCAGTACCGGCGNRG   | GtGcAGG--GgTCACtGtCGGG     | + | 5 | 2 | 0 | 3.30 | 1.65 |
| Chr6:81106471-81106493    | 81106489  | 2 | RNA | GGCCGAGGTGCAGTACCGGCGNRG   | GtCGGAGGcCGAC--CCGtCAGG    | + | 5 | 2 | 0 | 3.30 | 1.65 |
| Chr5:34015526-34015548    | 34015544  | 2 | RNA | GGCCGAGGTGCAGTACCGGCGNRG   | tGCGacGGT--ACTActtGCTAG    | + | 5 | 2 | 0 | 3.30 | 1.65 |
| Chr8:11313356-113133378   | 113133360 | 2 | RNA | GGCCGAGGTGCAGTACCGGCGNRG   | cCGCCgGGTGCAGTt--GgaAGG    | - | 4 | 2 | 0 | 3.30 | 1.65 |
| Chr7:47143964-47143986    | 47143970  | 4 | RNA | GGCCGAGGTGCAGTACCGGCGNRG   | GGGtCGAGGcCGAgg--CGgAG     | - | 5 | 2 | 0 | 3.30 | 1.65 |

|                           |   |     |                           |                            |   |   |   |   |      |      |
|---------------------------|---|-----|---------------------------|----------------------------|---|---|---|---|------|------|
| Chr3:195863035-195863057  | 5 | DNA | GGCCGAGGTCGACTA-CCGGCNRG  | cttCaAGGcGCACaATCCGGCAGG   | - | 5 | 2 | 3 | 0.00 | 1.50 |
| Chr9:9851479-9851501      | 3 | RNA | GGCCGAGGTGCAGTACCGGCNRG   | GGtCaAGGcGAgc-CHGGCCGG     | + | 5 | 2 | 3 | 0.00 | 1.50 |
| Chr9:22545982-22546004    | 3 | RNA | GGCCGAGGTGCAGTACCGGCNRG   | GGtCcaGtTCgC-CCGCGAG       | + | 5 | 2 | 3 | 0.00 | 1.50 |
| Chr5:53892169-53892191    | 3 | RNA | GGCCGAGGTGCAGTACCGGCNRG   | G-aCGGgGTGCACaAGcGgCGG     | + | 5 | 1 | 3 | 0.00 | 1.50 |
| Chr4:45405850-45405872    | 5 | RNA | GGCCGAGGTGCAGTACCGGCNRG   | GGaCcaAGTcG-TCcCaGatAG     | - | 5 | 2 | 3 | 0.00 | 1.50 |
| Chr3:66790130-66790152    | 5 | RNA | GGCCGAGGTGCAGTACCGGCNRG   | GGCCGAGGTGCAGTACCGGCNRG    | - | 5 | 2 | 3 | 0.00 | 1.50 |
| Chr2:58887090-58887112    | 3 | RNA | GGCCGAGGTGCAGTACCGGCNRG   | GgGcG-GGcCaGcTcCGGcCGG     | + | 5 | 2 | 3 | 0.00 | 1.50 |
| Chr3:19399605-19399627    | 3 | RNA | GGCCGAGGTGCAGTACCGGCNRG   | GGCCGAGGcGCAC-CGgAGcCAG    | + | 3 | 2 | 3 | 0.00 | 1.50 |
| Chr4:136515459-136515481  | 3 | RNA | GGCCGAGGTGCAGTACCGGCNRG   | aGCGGAG-aaAGtTCcCGcCGG     | - | 5 | 2 | 3 | 0.00 | 1.50 |
| Chr3:230050058-230050080  | 5 | RNA | GGCCGAGGTGCAGTACCGGCNRG   | GrCCG-GTGaCcaACCGaATG      | - | 5 | 2 | 3 | 0.00 | 1.50 |
| Chr6:55177304-55177326    | 3 | RNA | GGCCGAGGTGCAGTACCGGCNRG   | GgCGAGGTtGtTAC-GCCAG       | + | 5 | 2 | 3 | 0.00 | 1.50 |
| Chr10:100294613-100294635 | 3 | RNA | GGCCGAGGTGCAGTACCGGCNRG   | t-CGAGGcGAGtGtCCGcCGG      | + | 5 | 2 | 3 | 0.00 | 1.50 |
| Chr10:32442091-32442113   | 3 | RNA | GGCCGAGGTGCAGTACCGGCNRG   | GgCtGcGtGACTA-GGtTGG       | - | 5 | 2 | 3 | 0.00 | 1.50 |
| Chr8:64079907-64079929    | 3 | RNA | GGCCGAGGTGCAGTACCGGCNRG   | GGaCaAGcGAGTACT-GaTAG      | + | 5 | 2 | 3 | 0.00 | 1.50 |
| Chr9:7723232-7723254      | 5 | DNA | GGCCGAGGTGCAG-CTACCGGCNRG | GGCCAGGcGcGAGGtGgGcGcCAG   | - | 5 | 2 | 3 | 0.00 | 1.50 |
| Chr2:155169783-155169805  | 3 | RNA | GGCCGAGGTGCAGTACCGGCNRG   | GGcGc-GrTCAGTcCGgAGaAG     | + | 5 | 2 | 3 | 0.00 | 1.50 |
| Chr4:33876484-33876506    | 3 | RNA | GGCCGAGGTGCAGTACCGGCNRG   | YGcG-GrTCGACTACCGCTGG      | + | 5 | 1 | 3 | 0.00 | 1.50 |
| Chr6:7358961-7358968      | 5 | DNA | GGCCGAGGTGCAGTACCGG-CNRG  | GGCCAGGcGcGtTGCTCGCTCCAG   | - | 5 | 2 | 3 | 0.00 | 1.50 |
| Chr8:40668907-40668929    | 5 | RNA | GGCCGAGGTGCAGTACCGGCNRG   | GGCCGAGGT-GAGaAaCGcCGG     | - | 5 | 1 | 3 | 0.00 | 1.50 |
| Chr2:128137627-128137649  | 3 | DNA | GGCCGAGGTGCAGTACCGG-CNRG  | cCGCCAGcTCACTcAGGcCGCG     | + | 5 | 1 | 3 | 0.00 | 1.50 |
| Chr4:228599171-228599193  | 3 | RNA | GGCCGAGGTGCAGTACCGGCNRG   | aaCcaAGTTCGcT-CCGCGCAG     | - | 5 | 1 | 3 | 0.00 | 1.50 |
| Chr2:213719094-213719116  | 3 | RNA | GGCCGAGGTGCAGTACCGGCNRG   | GrCCG-GcGcGAtaACCGcCAGG    | - | 5 | 2 | 3 | 0.00 | 1.50 |
| Chr2:124931731-124931753  | 3 | RNA | GGCCGAGGTGCAGTACCGGCNRG   | tGCCGtGGTCGcG-CCGCGAG      | + | 4 | 2 | 3 | 0.00 | 1.50 |
| Chr5:84770055-84770077    | 3 | RNA | GGCCGAGGTGCAGTACCGGCNRG   | GGC-AGGCGcAGcACCGGCGCG     | - | 3 | 2 | 3 | 0.00 | 1.50 |
| Chr4:63176355-63176377    | 3 | DNA | GGCCGAGGTGCAG-CTACCGGCNRG | GgcCaTcTCGATTTCCTCCGCGCAG  | + | 5 | 2 | 3 | 0.00 | 1.50 |
| Chr6:40001900-40001922    | 3 | RNA | GGCCGAGGTGCAGTACCGGCNRG   | GGaCGAGGTGCAGCaA-GrTAG     | - | 5 | 2 | 3 | 0.00 | 1.50 |
| Chr4:111008653-111008675  | 5 | X   | GGCCGAGGTGCAGTACCGGCNRG   | GgaaGAGGTGGrCTAGcGCTCTG    | - | 5 | 0 | 3 | 0.00 | 1.50 |
| Chr4:188538030-188538052  | 5 | RNA | GGCCGAGGTGCAGTACCGGCNRG   | G-aCGGTCGTCAGcAGcGCGGG     | - | 5 | 1 | 3 | 0.00 | 1.50 |
| Chr3:77466751-77466773    | 3 | RNA | GGCCGAGGTGCAGTACCGGCNRG   | tG-GaHTGcGcTAgCGGcGGG      | + | 5 | 2 | 3 | 0.00 | 1.50 |
| Chr5:157330107-157330129  | 5 | DNA | GGC-CGAGGTGCAGTACCGGCNRG  | GrCTCGGcGcGCTHCCGGCTGG     | - | 5 | 1 | 3 | 0.00 | 1.50 |
| Chr5:11328005-11328027    | 5 | DNA | GGCCGAG-GTCACTACCGGCNRG   | GtTCAGGcGTCaACGcCGCGGG     | - | 5 | 1 | 3 | 0.00 | 1.50 |
| Chr10:39633639-39633661   | 3 | DNA | GGCCGA-GGTCACTACCGGCNRG   | GGCaCAGGTGCAGTACcAcCGGG    | + | 3 | 1 | 3 | 0.00 | 1.50 |
| Chr2:219570108-219570120  | 3 | RNA | GGCCGAGGTGCAGTACC-GGCNRG  | GGCgGAGGTCTGgGtGAGGcCAG    | + | 5 | 2 | 3 | 0.00 | 1.50 |
| Chr8:77297147-77297169    | 3 | DNA | GGCCGAGGTGCAGTACCGGCNRG   | GGcGAGtGTGACTA-GaCTAG      | + | 4 | 2 | 3 | 0.00 | 1.50 |
| Chr1:74967262-74967284    | 3 | RNA | GGCCGAGGTGCAGTACCGGCNRG   | GaCaG-GGTGCAGcAGcCaGcGGG   | + | 5 | 1 | 3 | 0.00 | 1.50 |
| Chr1:78346621-78346643    | 3 | RNA | GGCCGAGGTGCAGTACCGGCNRG   | GrCCG-GrTCAGcAGcCGGcCAG    | - | 5 | 1 | 3 | 0.00 | 1.50 |
| Chr4:91865786-91865808    | 3 | RNA | GGCCGAGGTGCAGTACCGGCNRG   | GGCaAGaTCACTTC-GrGCGAG     | + | 5 | 1 | 3 | 0.00 | 1.50 |
| Chr6:80911482-80911504    | 3 | RNA | GGCCGAGGTGCAGTACCGGCNRG   | GgGCGAGG-GlaTgGCGCTGG      | + | 5 | 2 | 3 | 0.00 | 1.50 |
| Chr8:85467880-85467902    | 5 | DNA | GGCCGAGGTGCAGTACCGGCNRG   | cGCGCGAGcGAGTACCGGcATAG    | - | 5 | 1 | 3 | 0.00 | 1.50 |
| Chr5:11142263-11142285    | 3 | DNA | GGCCGAG-GTCACTACCGGCNRG   | GtTCAGGcGTCaACgATCGGcAGG   | + | 5 | 2 | 3 | 0.00 | 1.50 |
| Chr4:42889199-42889221    | 5 | RNA | GGCCGAGGTGCAGTACCGGCNRG   | GGC-tcGgGACTACCGCTCGG      | - | 4 | 2 | 3 | 0.00 | 1.50 |
| Chr1:85673274-85673296    | 5 | RNA | GGCCGAGGTGCAGTACCGGCNRG   | GGG-tcGgGACTACCGCTCGG      | - | 5 | 2 | 3 | 0.00 | 1.50 |
| Chr2:206150669-206150691  | 5 | RNA | GGCCGAGGTGCAGTACCGGCNRG   | caCcaAGTTCGcT-CCGCGAG      | - | 5 | 1 | 3 | 0.00 | 1.50 |
| Chr1:286083702-286083724  | 3 | RNA | GGCCGAGGTGCAGTACCGGCNRG   | GGCCGAGG-CGAGTTCGAGcAG     | + | 5 | 2 | 3 | 0.00 | 1.50 |
| Chr1:81781405-81781427    | 3 | RNA | GGCCGAGGTGCAGTACCGGCNRG   | GGGcCAGG-CGrGcAGcAGcCGGG   | + | 5 | 2 | 3 | 0.00 | 1.50 |
| Chr8:69059183-69059205    | 5 | RNA | GGCCGAGGTGCAGTACCGGCNRG   | GGCCGAGGGrAcCTcAGcCTAG     | - | 5 | 1 | 3 | 0.00 | 1.50 |
| Chr7:43056476-43056498    | 3 | RNA | GGCCGAGGTGCAGTACCGGCNRG   | GGCCGgGATc-CTcCAGcCAG      | + | 5 | 2 | 3 | 0.00 | 1.50 |
| Chr7:85795292-85795314    | 5 | RNA | GGCCGAGGTGCAGTACCGGCNRG   | GGCCtAGGcGAGT-TcGCTAG      | - | 5 | 2 | 3 | 0.00 | 1.50 |
| Chr9:107862653-107862675  | 3 | RNA | GGCCGAGGTGCAGTACCGGCNRG   | GGG-tcGgGACTACCGCTGG       | + | 4 | 2 | 3 | 0.00 | 1.50 |
| Chr2:188710859-188710881  | 3 | DNA | GGCCGAGG-TGCACTACCGGCNRG  | GGCCGAGaAGcGrCTcCGCGCGGG   | + | 4 | 1 | 3 | 0.00 | 1.50 |
| Chr10:53404957-53404979   | 5 | RNA | GGCCGAGGTGCAGTACCGGCNRG   | GggaAGGGr-CTACGCGCCGG      | - | 5 | 2 | 3 | 0.00 | 1.50 |
| Chr3:202112108-202112130  | 3 | RNA | GGCCGAGGTGCAGTACCGGCNRG   | GGTCAGtGcGACaCa-GrAGAG     | + | 5 | 2 | 3 | 0.00 | 1.50 |
| Chr1:223701304-223701326  | 3 | RNA | GGCCGAGGTGCAGTACCGGCNRG   | GGGcGAGaTCAcC-ACCGGAGAG    | + | 5 | 1 | 3 | 0.00 | 1.50 |
| Chr1:244285271-244285293  | 3 | DNA | GGCCGAGGTGCAGTACCG-GCNRG  | GGTCGAGGAGCaAGcAGgGCGGG    | + | 5 | 1 | 3 | 0.00 | 1.50 |
| Chr9:47069710-47069732    | 3 | RNA | GGCCGAGGTGCAGTACCGGCNRG   | GGCgAGcTCACTC-CCGCGCAG     | + | 4 | 1 | 3 | 0.00 | 1.50 |
| Chr7:14598044-14598066    | 5 | DNA | GGCCGAGGTGCAGTACCGG-CNRG  | GGCCAGGcAGcAGcCGGCTGGG     | - | 5 | 2 | 3 | 0.00 | 1.50 |
| Chr10:96085458-96085480   | 5 | RNA | GGCCGAGGTGCAGTACCGGCNRG   | aGrCaAGGcGcGA-AGcGACAG     | - | 5 | 2 | 3 | 0.00 | 1.50 |
| Chr3:71530987-71531009    | 3 | RNA | GGCCGAGGTGCAGTACCGGCNRG   | GGCCGcGcGgGcGc-GrGCGCCGG   | + | 5 | 2 | 3 | 0.00 | 1.50 |
| Chr1:134632198-134632220  | 3 | RNA | GGCCGAGGTGCAGTACCGGCNRG   | cGCGcGGTTC-ACcAGCGCGCAG    | + | 5 | 1 | 3 | 0.00 | 1.50 |
| Chr9:1353433-1353455      | 3 | RNA | GGCCGAGGTGCAGTACCGGCNRG   | GG-GccGTGcAGcACGAGAG       | + | 5 | 2 | 3 | 0.00 | 1.50 |
| Chr7:8237970-8237992      | 3 | RNA | GGCCGAGGTGCAGTACCGGCNRG   | GGCCGAGcGcGA-AGgGGGAG      | + | 5 | 2 | 3 | 0.00 | 1.50 |
| Chr4:243915434-243915456  | 5 | RNA | GGCCGAGGTGCAGTACCGGCNRG   | G-aCGGgGTGCAGCaAGcGCGGG    | + | 5 | 1 | 3 | 0.00 | 1.50 |
| Chr6:36665946-36665968    | 5 | RNA | GGCCGAGGTGCAGTACCGGCNRG   | GgagGcGcG-CCAGcACCGCGAG    | - | 5 | 1 | 3 | 0.00 | 1.50 |
| Chr2:106984011-106984033  | 3 | RNA | GGCCGAGGTGCAGTACCGGCNRG   | GG-GAGGTGCAGCaAGgAGGAG     | - | 5 | 2 | 3 | 0.00 | 1.50 |
| Chr8:63793283-63793305    | 5 | RNA | GGCCGAGGTGCAGTACCGGCNRG   | GGG-tcGcGACTACCGCTGG       | - | 4 | 2 | 3 | 0.00 | 1.50 |
| Chr8:9809744-9809766      | 3 | RNA | GGCCGAGGTGCAGTACCGGCNRG   | GGGcGAGGTGCAGTACCGGCNRG    | - | 5 | 2 | 3 | 0.00 | 1.50 |
| Chr2:49880304-49880326    | 5 | DNA | GGCCGAGG-GTCACTACCGGCNRG  | GcCCGAGTGrCTGCGcACCGcCAG   | + | 5 | 2 | 3 | 0.00 | 1.50 |
| Chr8:94951551-94951573    | 3 | DNA | GGCCGAGGTGCAG-TACCGGCNRG  | aGcCAGAGcAGCGTAgCGcGGG     | + | 5 | 1 | 3 | 0.00 | 1.50 |
| Chr4:282017-282039        | 3 | DNA | GGCCGAGGTGCAG-CTACCGGCNRG | GgcGrCaTaTCGATTCTACCGGCGAG | + | 5 | 2 | 3 | 0.00 | 1.50 |
| Chr4:146362552-146362574  | 3 | RNA | GGCCGAGGTGCAGTACCGGCNRG   | G-aCGGTCGTCAGcAGcAGcGGGG   | + | 5 | 1 | 3 | 0.00 | 1.50 |
| Chr6:150702946-150702968  | 5 | RNA | GGCCGAGGTGCAGTACCGGCNRG   | GGaCGAcCccGAGT-CCGGTGG     | - | 5 | 2 | 3 | 0.00 | 1.50 |
| Chr6:6554771-6554793      | 3 | RNA | GGCCGAGGTGCAGTACCGGCNRG   | GrCCGAGcGcCGA-ACtcGgTAG    | + | 5 | 2 | 3 | 0.00 | 1.50 |
| Chr8:139110353-139110375  | 3 | RNA | GGCCGAGGTGCAGTACCGGCNRG   | cGCCAGrTCGAtaC-GrTCAG      | - | 5 | 2 | 3 | 0.00 | 1.50 |
| Chr4:246679674-246679696  | 5 | RNA | GGCCGAGGTGCAGTACCGGCNRG   | GGCCt-GrCaAGTCCGGGCGAG     | - | 5 | 2 | 3 | 0.00 | 1.50 |
| Chr4:148403328-148403350  | 5 | RNA | GGCCGAGGTGCAGTACCGGCNRG   | GGaGrCc-GrACTTCGcCGGG      | - | 5 | 2 | 3 | 0.00 | 1.50 |
| Chr8:44405456-44405478    | 3 | RNA | GGCCGAGGTGCAGTACCGGCNRG   | GGCCGAGGTGCAGTACCGGCNRG    | + | 4 | 2 | 3 | 0.00 | 1.50 |
| Chr7:137679183-137679205  | 3 | RNA | GGCCGAGGTGCAGTACCGGCNRG   | GGaCAGGTGG-TCCcCaGrTGG     | - | 5 | 2 | 3 | 0.00 | 1.50 |
| Chr6:100859359-100859381  | 5 | RNA | GGCCGAGGTGCAGTACCGGCNRG   | GGC-AGGrCaACccCGCGCCGG     | - | 4 | 2 | 3 | 0.00 | 1.50 |
| Chr2:134158352-134158374  | 3 | RNA | GGCCGAGGTGCAGTACCGGCNRG   | GGC-tcGcAGTACCGCTCGG       | - | 4 | 2 | 3 | 0.00 | 1.50 |
| Chr6:172138342-172138364  | 3 | RNA | GGCCGAGGTGCAGTACCGGCNRG   | T-CGgGcGcGrCTHCCGGCTGG     | + | 5 | 2 | 3 | 0.00 | 1.50 |
| Chr9:34716853-34716875    | 3 | RNA | GGCCGAGGTGCAGTACCGGCNRG   | aGrCAGAGTGrG-TACaGacCAG    | + | 5 | 2 | 3 | 0.00 | 1.50 |
| Chr2:58230730-58230752    | 3 | RNA | GGCCGAGGTGCAGTACCGGCNRG   | GaCgaAGGTgGACTA-GrCAGG     | + | 5 | 2 | 3 | 0.00 | 1.50 |
| Chr7:66577596-66577618    | 3 | RNA | GGCCGAGGTGCAGTACCGGCNRG   | GGCCAGccGcGAG-CCGrGgG      | - | 5 | 2 | 3 | 0.00 | 1.50 |
| Chr7:74059386-74059408    | 3 | RNA | GGCCGAGGTGCAGTACCGGCNRG   | GgGcG-GGcCaCctCCGCGCCGG    | + | 5 | 1 | 3 | 0.00 | 1.50 |
| Chr2:58847360-58847382    | 3 | RNA | GGCCGAGGTGCAGTACCGGCNRG   | GGG-AGGcAGccAGcAGCGCAGG    | - | 4 | 2 | 3 | 0.00 | 1.50 |
| Chr5:87876141-87876163    | 5 | DNA | GGCCGAGGTGCAGTACCGGCNRG   | GGCaAGGTGrCGACaATCCGCTGG   | + | 5 | 2 | 3 | 0.00 | 1.50 |
| Chr10:2207549-2207565     | 3 | RNA | GGCCGAGGTGCAGTACCGGCNRG   | G-aGCGGgGAGcAGcCGGCTGG     | + | 5 | 2 | 3 | 0.00 | 1.50 |
| Chr3:132257332-132257354  | 3 | DNA | GGC-CGAGGTGCAGTACCGGCNRG  | GrCTCGGcGcGrCTHCCGGCTGG    | + | 5 | 1 | 3 | 0.00 | 1.50 |
| Chr4:138186651-138186673  | 3 | RNA | GGCCGAGGTGCAGTACCGGCNRG   | GgGcGrG-GGAGgtCCGCGCGG     | + | 3 | 2 | 3 | 0.00 | 1.50 |
| Chr2:26553003-26553025    | 5 | RNA | GGCCGAGGTGCAGTACCGGCNRG   | GGCCGAGGTGrGcG-CaAGgGAG    | - | 5 | 2 | 3 | 0.00 | 1.50 |
| Chr3:205099959-205099981  | 5 | RNA | GGCCGAGGTGCAGTACCGGCNRG   | tGrCAGAGTGrG-TCCGrGATAG    | - | 5 | 2 | 3 | 0.00 | 1.50 |
| Chr3:12054105-12054127    | 3 | RNA | GGCCGAGGTGCAGTACCGGCNRG   | tGgaAGAGTgAGaCaC-GrCTGG    | + | 5 | 2 | 3 | 0.00 | 1.50 |
| Chr4:9116443-9116465      | 5 | RNA | GGCCGAGGTGCAGTACCGGCNRG   | cGaAGAGtGrCGAtaC-GrCCAG    | + | 4 | 2 | 3 | 0.00 | 1.50 |
| Chr7:72561296-72561318    | 3 | RNA | GGCCGAGGTGCAGTACCGGCNRG   | GgGcGAGcTCTH-TAgCGGCGAG    | + | 5 | 1 | 3 | 0.00 | 1.50 |
| Chr7:45607765-45607787    | 3 | DNA | GGCCGAGGTGCAGTACCGG-CNRG  | cGrCGGGrTcGAGcAGCGGcAG     | + | 5 | 1 | 3 | 0.00 | 1.50 |
| Chr9:63648216-63648238    | 3 | RNA | GGCCGAGGTGCAGTACCGGCNRG   | GGCCCaAGaTGAAT-GrCCAG      | + | 5 | 2 | 3 | 0.00 | 1.50 |
| Chr8:145308585-145308607  | 5 | DNA | GGCCGAGGTGCAGTACCGGCNRG   | aGrCAGAGTGrTCGCaAaAGGcCAGG | - | 5 | 2 | 3 | 0.00 | 1.50 |
| Chr6:90307141-90307163    | 3 | DNA | GGCCGAGGTGCAGTACCGGCNRG   | GtTCcGAGcGAGCTGrCGGCCCG    | + | 5 | 1 | 3 | 0.00 | 1.50 |
| Chr4:85644323-85644345    | 3 | RNA | GGCCGAGGTGCAGTACCGGCNRG   | GgGgGrGTTGCAG-GrGCGAGG     | + | 5 | 2 | 3 | 0.00 | 1.50 |
| Chr6:65905996-65906018    | 5 | RNA | GGCCGAGGTGCAGTACCGGCNRG   | aGrCGGrG-GrGaTTCGGCGCAG    | - | 5 | 2 | 3 | 0.00 | 1.50 |
| Chr5:62958383-62958405    | 3 | RNA | GGCCGAGGTGCAGTACCGGCNRG   | GgGcG-GGcCaCctCCGCGCCGG    | + | 5 | 2 | 3 | 0.00 | 1.50 |
| Chr3:221386973-221386995  | 3 | RNA | GGCCGAGGTGCAGTACCGGCNRG   | GrCCG-GrTGcAGcACCGaCAG     | + | 5 | 2 | 3 | 0.00 | 1.50 |
| Chr9:107556476-107556498  | 3 | RNA | GGCCGAGGT                 |                            |   |   |   |   |      |      |

|                           |           |   |     |                           |                            |   |   |   |   |      |      |
|---------------------------|-----------|---|-----|---------------------------|----------------------------|---|---|---|---|------|------|
| Chr10:78654684-78654706   | 78654691  | 5 | RNA | GGCCGAGGTCGACTACCGGCGNRG  | GGC-GAGGTCGAggACtHgGGG     | - | 5 | 1 | 3 | 0.00 | 1.50 |
| Chr1:267012530-267012552  | 267012537 | 5 | RNA | GGCCGAGGTCGACTACCGGCGNRG  | G-aCGGgGTGCACaGgaCGGGG     | - | 5 | 1 | 3 | 0.00 | 1.50 |
| Chr10:125820073-125820095 | 125820080 | 5 | DNA | GGCCGAGGTCGACTACCC-GGCNRG | GGGgGAGGTCGgTCgGCaGAGGCGAG | - | 5 | 2 | 3 | 0.00 | 1.50 |
| Chr4:94800265-94800287    | 94800272  | 5 | RNA | GGCCGAGGTCGACTACCGGCGNRG  | tGCGgGCTCGACTAC-GGaCGG     | - | 5 | 1 | 3 | 0.00 | 1.50 |
| Chr4:10013239-10013261    | 10013256  | 3 | RNA | GGCCGAGGTCGACTACCGGCGNRG  | ttCCGAGtCCGATTA-GGCAAG     | + | 5 | 2 | 3 | 0.00 | 1.50 |
| Chr9:120983383-120983405  | 120983400 | 3 | DNA | GGCCGAGGTCGACTACCGGCGNRG  | GGGCGAGGTCGATTCAGgCGAG     | + | 5 | 2 | 3 | 0.00 | 1.50 |
| Chr4:13009066-13009068    | 13009063  | 5 | RNA | GGCCGAGGTCGACTACCGGCGNRG  | GggCGAGGTG-CACgCGGgCG      | + | 5 | 1 | 3 | 0.00 | 1.50 |
| Chr4:6496967-6496989      | 6496984   | 5 | RNA | GGCCGAGGTCGACTACCGGCGNRG  | GgGgCGAGGTG-gACaAGGCGGG    | + | 5 | 2 | 3 | 0.00 | 1.50 |
| Chr6:36624904-36624926    | 36624911  | 5 | RNA | GGCCGAGGTCGACTACCGGCGNRG  | tGCGAGGTTG-CTAHTGtGG       | - | 5 | 2 | 3 | 0.00 | 1.50 |
| Chr5:101643973-101643995  | 101643980 | 5 | RNA | GGCCGAGGTCGACTACCGGCGNRG  | GGC-HtGgGACTACGtCGT        | - | 5 | 2 | 3 | 0.00 | 1.50 |
| Chr2:222670902-222670924  | 222670919 | 3 | RNA | GGCCGAGGTCGACTACCGGCGNRG  | G-HtGCGGAGtTCCGCGGG        | + | 5 | 2 | 3 | 0.00 | 1.50 |
| Chr7:21137739-21137761    | 21137756  | 3 | DNA | GGCCGAGGTCGACTACCGGCGNRG  | GGCtGAGGCTGACTACtCGaAGG    | + | 4 | 1 | 3 | 0.00 | 1.50 |
| Chr8:172012767-172012789  | 172012784 | 3 | RNA | GGCCGAGGTCGACTACCGGCGNRG  | caCC-AGGTGCGtCACTCGgAGG    | + | 5 | 1 | 3 | 0.00 | 1.50 |
| Chr3:54020223-54020245    | 54020230  | 5 | RNA | GGCCGAGGTCGACTACCGGCGNRG  | tGtCG-GaCGaATCGGGCAAG      | - | 5 | 2 | 3 | 0.00 | 1.50 |
| Chr4:121470030-121470052  | 121470037 | 5 | RNA | GGCCGAGGTCGACTACCGGCGNRG  | G-CCtGgCGGAGtATCGGCAAG     | - | 5 | 1 | 3 | 0.00 | 1.50 |
| Chr6:168809714-168809736  | 168809731 | 3 | RNA | GGCCGAGGTCGACTACCGGCGNRG  | GCGGAGGG-CGtTAAGtGCTGG     | + | 5 | 1 | 3 | 0.00 | 1.50 |
| Chr1:42321946-42321968    | 42321963  | 3 | RNA | GGCCGAGGTCGACTACCGGCGNRG  | tGCCGAGGTgG-TgGtGCTGG      | + | 5 | 2 | 3 | 0.00 | 1.50 |
| Chr7:26196527-26196549    | 26196544  | 3 | RNA | GGCCGAGGTCGACTACCGGCGNRG  | GaCa-GGTGCACaAGgCGGG       | + | 5 | 1 | 3 | 0.00 | 1.50 |
| Chr3:183744311-183744333  | 183744318 | 5 | RNA | GGCCGAGGTCGACTACCGGCGNRG  | GGCCAGGgCGG-cgCGCGGG       | - | 5 | 2 | 3 | 0.00 | 1.50 |
| Chr1:2335196-2335218      | 2335213   | 3 | RNA | GGCCGAGGTCGACTACCGGCGNRG  | G-aCGGgGTGCAGaGgaCGGG      | + | 5 | 1 | 3 | 0.00 | 1.50 |
| Chr9:81333146-81333168    | 81333153  | 5 | RNA | GGCCGAGGTCGACTACCGGCGNRG  | GGC-tcGgGACTACCGCTGG       | - | 4 | 2 | 3 | 0.00 | 1.50 |
| Chr1:61110248-61110270    | 61110265  | 5 | RNA | GGCCGAGGTCGACTACCGGCGNRG  | GGC-gGCGCaCtCCGCGCG        | + | 5 | 2 | 3 | 0.00 | 1.50 |
| Chr5:11950623-11950645    | 11950640  | 3 | DNA | GG-CCGAGGTGCACTACCGGCGNRG | GGtACGAAGGgCGCaCcaCGCAAG   | + | 5 | 1 | 3 | 0.00 | 1.50 |
| Chr2:51023454-51023476    | 51023461  | 5 | RNA | GGCCGAGGTCGACTACCGGCGNRG  | G-CCtGgGgCGAGtACGGCAGG     | - | 5 | 1 | 3 | 0.00 | 1.50 |
| Chr6:70088222-70088244    | 70088239  | 3 | RNA | GGCCGAGGTCGACTACCGGCGNRG  | GGCaAGaG-GACTcGgCGCG       | + | 4 | 2 | 3 | 0.00 | 1.50 |
| Chr1:43873663-43873685    | 43873680  | 5 | RNA | GGCCGAGGTCGACTACCGGCGNRG  | GGCCGAGGTCGAGgGAGG         | - | 5 | 2 | 3 | 0.00 | 1.50 |
| Chr1:165740390-165704412  | 165704007 | 5 | RNA | GGCCGAGGTCGACTACCGGCGNRG  | G-aCGGgGTGCAGaGgaCGGG      | + | 5 | 1 | 3 | 0.00 | 1.50 |
| Chr5:122722957-122722979  | 122722964 | 5 | DNA | GGCCGAGGTCGACTACCGGCGNRG  | GGGgAGGTtGtTCTACTACGGCTAG  | - | 5 | 2 | 3 | 0.00 | 1.50 |
| Chr1:150154701-150154723  | 150154718 | 3 | RNA | GGCCGAGGTCGACTACCGGCGNRG  | tGCaGgGCTGACTA-GGtTGG      | + | 5 | 2 | 3 | 0.00 | 1.50 |
| Chr4:95396893-95396915    | 95396900  | 5 | RNA | GGCCGAGGTCGACTACCGGCGNRG  | GgGCGGtCGtCGtCT-CTGgGAGG   | - | 5 | 1 | 3 | 0.00 | 1.50 |
| Chr5:115739814-115739836  | 115739821 | 5 | RNA | GGCCGAGGTCGACTACCGGCGNRG  | GGtCGAGtGtGACTA-GGtTGG     | - | 5 | 2 | 3 | 0.00 | 1.50 |
| Chr2:164461449-164461471  | 164461456 | 5 | RNA | GGCCGAGGTCGACTACCGGCGNRG  | GgGCGAGGgCGA-AggGtGgGAG    | - | 5 | 2 | 3 | 0.00 | 1.50 |
| Chr2:160086853-160086875  | 160086860 | 5 | RNA | GGCCGAGGTCGACTACCGGCGNRG  | GgggGAGGTgG-TAggAGtCGG     | - | 5 | 2 | 3 | 0.00 | 1.50 |
| Chr5:22807892-22807914    | 22807899  | 5 | RNA | GGCCGAGGTCGACTACCGGCGNRG  | GGtCAaCTCG-CTACtCGG        | - | 5 | 1 | 3 | 0.00 | 1.50 |
| Chr9:35485798-35485820    | 35485805  | 5 | RNA | GGCCGAGGTCGACTACCGGCGNRG  | GGCGGtTtCGAGtTA-GtCCGG     | - | 5 | 2 | 3 | 0.00 | 1.50 |
| Chr2:17754457-17754479    | 17754474  | 3 | RNA | GGCCGAGGTCGACTACCGGCGNRG  | GtCGAGAGTTC-CTAGtCGAG      | - | 5 | 1 | 3 | 0.00 | 1.50 |
| Chr9:7548854-7548876      | 7548861   | 5 | RNA | GGCCGAGGTCGACTACCGGCGNRG  | GGtCGAGGtGCTGtCGGCTGG      | - | 5 | 1 | 3 | 0.00 | 1.50 |
| Chr5:8595965-8595967      | 85959672  | 5 | RNA | GGCCGAGGTCGACTACCGGCGNRG  | GtCGAGGtCGAC-CGtCGAAG      | - | 5 | 2 | 3 | 0.00 | 1.50 |
| Chr1:119836610-119836632  | 119836617 | 5 | RNA | GGCCGAGGTCGACTACCGGCGNRG  | GGC-GAGGTGCGAGCaGgaTAG     | - | 4 | 1 | 3 | 0.00 | 1.50 |
| Chr2:5972866-5972888      | 5972883   | 3 | RNA | GGCCGAGGTCGACTACCGGCGNRG  | tGCGtGgGctT-TcCGCGCCG      | + | 5 | 2 | 3 | 0.00 | 1.50 |
| Chr3:38682391-38682413    | 38682398  | 5 | RNA | GGCCGAGGTCGACTACCGGCGNRG  | aGCGaGtGtCACTAGC-CAGG      | - | 5 | 2 | 3 | 0.00 | 1.50 |
| Chr6:135776647-135776669  | 135776654 | 5 | DNA | GGC-CGAGGTGCACTACCGGCGNRG | GGCTCTGgGgGtACaCcgCGCGGG   | - | 5 | 2 | 3 | 0.00 | 1.50 |
| Chr6:170124276-170124298  | 170124283 | 5 | RNA | GGCCGAGGTCGACTACCGGCGNRG  | GGGCaGtCTGtCGtCT-GtCGAG    | - | 5 | 1 | 3 | 0.00 | 1.50 |
| Chr1:18355817-18355839    | 18355834  | 3 | RNA | GGCCGAGGTCGACTACCGGCGNRG  | cGCGa-GTCTGtTACCGGAGG      | + | 5 | 2 | 3 | 0.00 | 1.50 |
| Chr9:144412821-144412843  | 144412828 | 5 | RNA | GGCCGAGGTCGACTACCGGCGNRG  | tGCCGtGgGctT-TcCGCGCCG     | - | 5 | 2 | 3 | 0.00 | 1.50 |
| Chr7:124852216-124852328  | 124852333 | 3 | RNA | GGCCGAGGTCGACTACCGGCGNRG  | GGC-HtGgGACTACCGCTGG       | - | 5 | 2 | 3 | 0.00 | 1.50 |
| Chr8:149453620-149453642  | 149453627 | 5 | RNA | GGCCGAGGTCGACTACCGGCGNRG  | Gg-GAGGTGAGaGCaGgAGG       | - | 4 | 2 | 3 | 0.00 | 1.50 |
| Chr5:2510066-2510088      | 2510083   | 5 | RNA | GGCCGAGGTCGACTACCGGCGNRG  | GGC-HtGgGACTACCGCTGG       | + | 4 | 2 | 3 | 0.00 | 1.50 |
| Chr3:5740871-5740893      | 5740888   | 3 | RNA | GGCCGAGGTCGACTACCGGCGNRG  | caCAAGtTGCtCT-CCGCGCAG     | + | 5 | 1 | 3 | 0.00 | 1.50 |
| Chr9:113641452-113641474  | 113641459 | 5 | DNA | GGCCGAGGTCGACTACCGGCGNRG  | GGCtGtTtTTCtACTACCGGCTAG   | - | 5 | 1 | 3 | 0.00 | 1.50 |
| Chr4:176923490-176923512  | 176923497 | 5 | RNA | GGCCGAGGTCGACTACCGGCGNRG  | GGC-AGGCaCtCtCCGCGCG       | - | 4 | 2 | 3 | 0.00 | 1.50 |
| Chr4:211891563-211891585  | 211891580 | 3 | DNA | GGCCGAGGTCGACTACCGGCGNRG  | GgaCGAGGtCTCtACtAGaAGG     | + | 5 | 1 | 3 | 0.00 | 1.50 |
| Chr2:124461429-124461451  | 124461446 | 3 | RNA | GGCCGAGGTCGACTACCGGCGNRG  | GtGtCA-TtCtACTcGggAGG      | + | 5 | 2 | 3 | 0.00 | 1.50 |
| Chr2:54091487-54091509    | 54091504  | 3 | RNA | GGCCGAGGTCGACTACCGGCGNRG  | cGCCGAaGtGCaItaC-GtGtCAG   | + | 5 | 2 | 3 | 0.00 | 1.50 |
| Chr1:147825700-147825722  | 147825717 | 3 | RNA | GGCCGAGGTCGACTACCGGCGNRG  | GgggGgGgCGA-ACCGtGtGG      | + | 5 | 2 | 3 | 0.00 | 1.50 |
| Chr10:128745627-128745649 | 128745634 | 3 | RNA | GGCCGAGGTCGACTACCGGCGNRG  | CtGgGAGGtGAG-CtCGtCGAG     | - | 5 | 2 | 3 | 0.00 | 1.50 |
| Chr4:29567025-29567047    | 29567042  | 5 | DNA | GGCCGAGGTCGACTACCGGCGNRG  | GGGCaAGGTCtCGgCaAGGgCAG    | + | 5 | 2 | 3 | 0.00 | 1.50 |
| Chr6:132897142-132897164  | 132897159 | 3 | RNA | GGCCGAGGTCGACTACCGGCGNRG  | GaCa-GGTGCAGCaAGgCGGG      | + | 5 | 1 | 3 | 0.00 | 1.50 |
| Chr7:81881669-81881691    | 81881676  | 5 | DNA | GGCCGAGGTCGACTACCGGCGNRG  | GgGCGAGtTgGtGTGACtCGCGG    | - | 5 | 1 | 3 | 0.00 | 1.50 |
| Chr2:60223890-60223912    | 60223897  | 5 | RNA | GGCCGAGGTCGACTACCGGCGNRG  | GGCGG-GTtCAAGtGAGAGG       | - | 5 | 2 | 3 | 0.00 | 1.50 |
| Chr10:112183284-112183306 | 112183291 | 5 | RNA | GGCCGAGGTCGACTACCGGCGNRG  | aGCaGAG-CGAaGcCGCGGG       | - | 5 | 2 | 3 | 0.00 | 1.50 |
| Chr9:32186804-32186826    | 32186811  | 5 | DNA | GGCCGAGGTCGACTACCGGCGNRG  | cGCGAGGatCTCtACCGGCGGG     | - | 5 | 1 | 3 | 0.00 | 1.50 |
| Chr10:88430537-88430559   | 88430544  | 5 | RNA | GGCCGAGGTCGACTACCGGCGNRG  | GGC-AGGCGAGatACCaCGGAG     | - | 4 | 2 | 3 | 0.00 | 1.50 |
| Chr5:195505904-195505926  | 195505911 | 5 | RNA | GGCCGAGGTCGACTACCGGCGNRG  | GaCtGCGGtGtCT-CGGCTGG      | - | 5 | 2 | 3 | 0.00 | 1.50 |
| Chr4:186335262-186335284  | 186335269 | 5 | RNA | GGCCGAGGTCGACTACCGGCGNRG  | GGCCtGtGCG-ACTAGGGAAG      | - | 5 | 2 | 3 | 0.00 | 1.50 |
| Chr7:17237341-17237363    | 17237358  | 3 | RNA | GGCCGAGGTCGACTACCGGCGNRG  | GGCCGAGGTCGAGgGAGG         | - | 5 | 2 | 3 | 0.00 | 1.50 |
| Chr5:201524946-201524968  | 201524953 | 5 | RNA | GGCCGAGGTCGACTACCGGCGNRG  | wtCCGgGT-GaCaCtCGGCGGG     | - | 4 | 1 | 3 | 0.00 | 1.50 |
| Chr5:27832865-27832887    | 27832872  | 5 | RNA | GGCCGAGGTCGACTACCGGCGNRG  | GGC-AGGCaCtCtCGGCGGG       | - | 5 | 2 | 3 | 0.00 | 1.50 |
| Chr1:181021666-181021688  | 181021673 | 5 | RNA | GGCCGAGGTCGACTACCGGCGNRG  | GGC-HtGgGACTACCGCTGG       | - | 4 | 2 | 3 | 0.00 | 1.50 |
| Chr8:15550544-15550566    | 15550561  | 3 | RNA | GGCCGAGGTCGACTACCGGCGNRG  | G-CCGAGGTGAGgtGgGCGAG      | + | 4 | 1 | 3 | 0.00 | 1.50 |
| Chr4:204248123-204248145  | 204248140 | 3 | RNA | GGCCGAGGTCGACTACCGGCGNRG  | cGCCAGtGCGAGC-CGGCTAG      | + | 5 | 2 | 3 | 0.00 | 1.50 |
| Chr1:28789432-28789454    | 28789439  | 5 | RNA | GGCCGAGGTCGACTACCGGCGNRG  | GtCCAGGTC-CaACCGtCAG       | - | 5 | 2 | 3 | 0.00 | 1.50 |
| Chr8:148618540-148618562  | 148618557 | 3 | RNA | GGCCGAGGTCGACTACCGGCGNRG  | GtCCG-GTgCaACCGGaAG        | + | 5 | 2 | 3 | 0.00 | 1.50 |
| Chr1:93501870-93501892    | 93501877  | 5 | RNA | GGCCGAGGTCGACTACCGGCGNRG  | GGC-AGGCGAGatACGCGCGG      | - | 4 | 2 | 3 | 0.00 | 1.50 |
| Chr1:102556097-102556119  | 102556114 | 3 | RNA | GGCCGAGGTCGACTACCGGCGNRG  | GtCCG-GTgCaACCGGaAG        | + | 5 | 2 | 3 | 0.00 | 1.50 |
| Chr6:19409954-19409976    | 19409961  | 5 | RNA | GGCCGAGGTCGACTACCGGCGNRG  | GGCCGAGGTCAGaC-GtGAG       | - | 5 | 2 | 3 | 0.00 | 1.50 |
| Chr1:4946356-4946378      | 4946363   | 5 | RNA | GGCCGAGGTCGACTACCGGCGNRG  | GtCCAGGc-CGAGCaAGaAGG      | - | 5 | 1 | 3 | 0.00 | 1.50 |
| Chr8:135074276-135074298  | 135074293 | 3 | RNA | GGCCGAGGTCGACTACCGGCGNRG  | GaCCAGGTC-GAGCaCaAGAG      | + | 5 | 1 | 3 | 0.00 | 1.50 |
| Chr6:36494689-36494711    | 36494696  | 5 | RNA | GGCCGAGGTCGACTACCGGCGNRG  | GGCaGtGtGT-CTtCGtCGAG      | - | 5 | 2 | 3 | 0.00 | 1.50 |
| Chr8:103269032-103269054  | 103269049 | 3 | RNA | GGCCGAGGTCGACTACCGGCGNRG  | GCaCgCGGTGCa-AagGCGGG      | + | 5 | 2 | 3 | 0.00 | 1.50 |
| Chr8:53054923-53054945    | 53054940  | 3 | RNA | GGCCGAGGTCGACTACCGGCGNRG  | G-aCGGgGTGCGAGaGgaCGGG     | + | 5 | 1 | 3 | 0.00 | 1.50 |
| Chr5:42636727-42636749    | 42636744  | 3 | RNA | GGCCGAGGTCGACTACCGGCGNRG  | ctCAAGGTGtGtG-gCGCGTGA     | + | 5 | 1 | 3 | 0.00 | 1.50 |
| Chr1:190416490-190416512  | 190416497 | 5 | RNA | GGCCGAGGTCGACTACCGGCGNRG  | GGC-tGtGgGACTCAAGtCTAG     | - | 5 | 2 | 3 | 0.00 | 1.50 |
| Chr7:65705760-65705782    | 65705767  | 5 | RNA | GGCCGAGGTCGACTACCGGCGNRG  | GGC-tcGtGACTACGtGCTGG      | - | 5 | 2 | 3 | 0.00 | 1.50 |
| Chr8:8288505-82885027     | 82885022  | 3 | RNA | GGCCGAGGTCGACTACCGGCGNRG  | cGCGGAGGtGg-TggCGCGAG      | + | 5 | 2 | 3 | 0.00 | 1.50 |
| Chr1:14525209-14525231    | 145252316 | 5 | RNA | GGCCGAGGTCGACTACCGGCGNRG  | GGCCGAGGTCGACTACCGCTGG     | - | 5 | 2 | 3 | 0.00 | 1.50 |
| Chr8:84291806-84291828    | 84291813  | 5 | RNA | GGCCGAGGTCGACTACCGGCGNRG  | GtCGaAaTCTAGT-CGGCTAG      | - | 5 | 1 | 3 | 0.00 | 1.50 |
| Chr1:5666526-5666548      | 5666533   | 5 | DNA | GGC-CGAGGTGCACTACCGGCGNRG | GtCTCGgGAGtGACTtCCGtTtG    | - | 5 | 1 | 3 | 0.00 | 1.50 |
| Chr5:62925996-62925618    | 62925603  | 5 | X   | GGCCGAGGTCGACTACCGGCGNRG  | GtCCGAGGTCaCtCGGCGGG       | - | 5 | 0 | 3 | 0.00 | 1.50 |
| Chr2:12763024-12763046    | 12763041  | 3 | RNA | GGCCGAGGTCGACTACCGGCGNRG  | GtGtCaAGGc-CTtCGtCGAG      | + | 5 | 2 | 3 | 0.00 | 1.50 |
| Chr6:172063662-172063684  | 172063669 | 5 | DNA | GGC-CGAGGTGCACTACCGGCGNRG | GtCTCGgGtGtGtCTtCGGCTGG    | - | 5 | 1 | 3 | 0.00 | 1.50 |
| Chr1:190593432-190593454  | 190593449 | 3 | RNA | GGCCGAGGTCGACTACCGGCGNRG  | tCCGAGTTCGATTA-HtCGCG      | + | 5 | 2 | 3 |      |      |

|                           |           |   |     |                           |                           |   |   |   |   |      |      |
|---------------------------|-----------|---|-----|---------------------------|---------------------------|---|---|---|---|------|------|
| Chr1:101957580-101957602  | 101957587 | 5 | RNA | GGCCGAGGTCGACTACCGGCGNRG  | GggCGAGGgGgGACaACC-gtGG   | - | 5 | 2 | 3 | 0.00 | 1.50 |
| Chr10:5790685-57907007    | 57907002  | 3 | RNA | GGCCGAGGTCGACTACCGGCGNRG  | GGCCtcGgaGgGgCaC-CCGAGG   | + | 5 | 2 | 3 | 0.00 | 1.50 |
| Chr2:197149932-197149954  | 197149949 | 3 | RNA | GGCCGAGGTCGACTACCGGCGNRG  | GGC-tcGgGACTACCGGCGNRG    | + | 4 | 2 | 3 | 0.00 | 1.50 |
| Chr1:214293557-214293579  | 214293564 | 5 | DNA | GG-CCGAGGTCGACTACCGGCGNRG | GGtACGAGGgGgGACgtCCGCGAAG | - | 5 | 1 | 3 | 0.00 | 1.50 |
| Chr4:7797161-7797183      | 7797178   | 3 | RNA | GGCCGAGGTCGACTACCGGCGNRG  | GgggAGG-aAGtAACGGCTGG     | + | 5 | 2 | 3 | 0.00 | 1.50 |
| Chr3:21541943-215419495   | 215419550 | 5 | RNA | GGCCGAGGTCGACTACCGGCGNRG  | GGCCG-GAGGtGtCaCgCGAGG    | - | 5 | 1 | 3 | 0.00 | 1.50 |
| Chr1:99480813-99480835    | 99480802  | 5 | RNA | GGCCGAGGTCGACTACCGGCGNRG  | GGCGGtGtCaTtTgCC-CAAG     | - | 5 | 2 | 3 | 0.00 | 1.50 |
| Chr5:214299556-214299578  | 214299563 | 5 | RNA | GGCCGAGGTCGACTACCGGCGNRG  | GaaaGAGGTCGCT-CCGGaAAG    | - | 5 | 1 | 3 | 0.00 | 1.50 |
| Chr7:13713100-13713122    | 13713107  | 3 | RNA | GGCCGAGGTCGACTACCGGCGNRG  | tg-CCAGGT-ACcACCaGCCAG    | - | 5 | 2 | 3 | 0.00 | 1.50 |
| Chr1:214344093-214344115  | 214344109 | 4 | RNA | GGCCGAGGTCGACTACCGGCGNRG  | tG-GGcGcCaCaCCcCGCAG      | + | 5 | 2 | 0 | 2.75 | 1.38 |
| Chr3:150252466-150252488  | 150252471 | 3 | RNA | GGCCGAGGTCGACTACCGGCGNRG  | tGCCGA-TacACcCGCGCCGG     | - | 5 | 2 | 0 | 2.75 | 1.38 |
| Chr8:151972397-151972419  | 151972404 | 5 | DNA | GGCCGAGGTCGACTAC-CCGCGNRG | GggGcAGGcCGgGggCGGCGCGG   | + | 5 | 1 | 0 | 2.75 | 1.38 |
| Chr3:102002994-102003016  | 102003010 | 4 | RNA | GGCCGAGGTCGACTACCGGCGNRG  | G-aCGAGGTCAaCaCgagCGGG    | + | 5 | 1 | 0 | 2.75 | 1.38 |
| Chr10:105202045-105202067 | 105202063 | 2 | RNA | GGCCGAGGTCGACTACCGGCGNRG  | GgcGcGgG-gGtTGCCGCGCGG    | + | 5 | 2 | 0 | 2.75 | 1.38 |
| Chr1:90735162-90735184    | 90735169  | 5 | RNA | GGCCGAGGTCGACTACCGGCGNRG  | GggGcGAGTCGt-cggCGCGGAG   | - | 5 | 1 | 0 | 2.75 | 1.38 |
| Chr8:38663694-38663716    | 38663709  | 5 | RNA | GGCCGAGGTCGACTACCGGCGNRG  | cCGCGGTGCGc-gCGCAGG       | + | 4 | 2 | 0 | 2.75 | 1.38 |
| Chr5:143935928-143935950  | 143935935 | 5 | RNA | GGCCGAGGTCGACTACCGGCGNRG  | GGC-AGGcCaACgTCGCGCAG     | - | 4 | 2 | 0 | 2.75 | 1.38 |
| Chr6:124161874-124161896  | 124161892 | 2 | DNA | GG-CCGAGGTCGACTACCGGCGNRG | GGTTCGAGGTCGACgtTCGCGAG   | + | 5 | 1 | 0 | 2.75 | 1.38 |
| Chr3:209532291-209532313  | 209532309 | 2 | X   | GGCCGAGGTCGACTACCGGCGNRG  | GGCCGAGcTCaCTcTCGCTAG     | + | 5 | 0 | 0 | 2.75 | 1.38 |
| Chr9:154883847-154883869  | 154883853 | 4 | RNA | GGCCGAGGTCGACTACCGGCGNRG  | GGCCGAGGtcGgCG-gGgTGG     | - | 5 | 2 | 0 | 2.75 | 1.38 |
| Chr4:243949172-243949194  | 243949179 | 5 | RNA | GGCCGAGGTCGACTACCGGCGNRG  | GGCCG-GGcAtCaACGCGCGG     | - | 5 | 1 | 0 | 2.75 | 1.38 |
| Chr7:70311146-70311168    | 70311164  | 2 | DNA | GGCCGAGGTCGACTA-CCGCGNRG  | GGCCGgGtAatCaATCCGCGGAG   | + | 5 | 1 | 0 | 2.75 | 1.38 |
| Chr2:2866583-2866605      | 2866587   | 3 | RNA | GGCCGAGGTCGACTACCGGCGNRG  | GGCCGagGgGtGACTC-GGCGAG   | + | 5 | 1 | 0 | 2.75 | 1.38 |
| Chr1:197944933-19744955   | 19744938  | 3 | DNA | GGCCGAGGTCGAC-TACCGGCGNRG | cGgTCGcGTGCAGGGtACGcCGG   | - | 5 | 2 | 0 | 2.75 | 1.38 |
| Chr7:9428967-9428989      | 9428995   | 2 | DNA | GGCCGAGGTCGACTACCGG-CNRG  | GGGcAGGgGcGAtTCGCTGCTCAG  | + | 5 | 2 | 0 | 2.75 | 1.38 |
| Chr1:28604275-28604297    | 28604291  | 4 | DNA | GGCCGAGGTCGACTACCGGCGNRG  | GGCCGAGGTCGACTACGtGGTGG   | - | 5 | 2 | 0 | 2.75 | 1.38 |
| Chr5:206571495-20657157   | 206571501 | 4 | RNA | GGCCGAGGTCGACTACCGGCGNRG  | GGCCGAGtAGC-TtgGcCGAGG    | - | 5 | 2 | 0 | 2.75 | 1.38 |
| Chr5:108783657-108783679  | 108783673 | 4 | RNA | GGCCGAGGTCGACTACCGGCGNRG  | GGtCaHTCGACTTC-GCTGG      | + | 5 | 2 | 0 | 2.75 | 1.38 |
| Chr7:133960443-133960465  | 133960461 | 2 | RNA | GGCCGAGGTCGACTACCGGCGNRG  | GGCCGcGgGgGgG-gGgGCCGG    | + | 5 | 2 | 0 | 2.75 | 1.38 |
| Chr7:117839999-117840021  | 117840017 | 2 | DNA | GGCCGAGGTCGACTACCGG-CNRG  | GgggaGAGGgGAGtCaACCGGCTAG | + | 5 | 1 | 0 | 2.75 | 1.38 |
| Chr5:182293559-182293581  | 182293577 | 2 | RNA | GGCCGAGGTCGACTACCGGCGNRG  | G-CGAtCTCGACTACaGCGAG     | - | 4 | 2 | 0 | 2.75 | 1.38 |
| Chr4:78527600-78527622    | 78527618  | 2 | RNA | GGCCGAGGTCGACTACCGGCGNRG  | cGaAGgTGT-CAACGGCGAGG     | + | 5 | 2 | 0 | 2.75 | 1.38 |
| Chr7:111091542-111091564  | 111091547 | 3 | RNA | GGCCGAGGTCGACTACCGGCGNRG  | aacCGAGGTGcCT-CAAGCTGG    | + | 4 | 1 | 0 | 2.75 | 1.38 |
| Chr7:88825173-88825195    | 88825179  | 4 | RNA | GGCCGAGGTCGACTACCGGCGNRG  | GgatGAGGTGCGTTC-CTAG      | - | 5 | 2 | 0 | 2.75 | 1.38 |
| Chr9:2955821-2955843      | 2955836   | 5 | RNA | GGCCGAGGTCGACTACCGGCGNRG  | GGCCG-GtaCaGAAtCaCGCAGG   | + | 5 | 1 | 0 | 2.75 | 1.38 |
| Chr4:15172579-15172597    | 15172597  | 2 | RNA | GGCCGAGGTCGACTACCGGCGNRG  | GGCCGAGGTCGACTACCGGCGNRG  | - | 5 | 1 | 0 | 2.75 | 1.38 |
| Chr3:2059371-2059393      | 2059376   | 3 | RNA | GGCCGAGGTCGACTACCGGCGNRG  | GGC-gGgGcCaCCcCGCGCGG     | - | 5 | 2 | 0 | 2.75 | 1.38 |
| Chr5:6589555-6589577      | 6589560   | 3 | RNA | GGCCGAGGTCGACTACCGGCGNRG  | GTCCG-GTgACaACCGaAG       | - | 5 | 2 | 0 | 2.75 | 1.38 |
| Chr8:56771348-56771370    | 56771366  | 2 | RNA | GGCCGAGGTCGACTACCGGCGNRG  | GGCAtGGcCGAGTTC-GCCAG     | + | 5 | 2 | 0 | 2.75 | 1.38 |
| Chr8:151877558-151877580  | 151877576 | 2 | DNA | GGCCGAGGTCGACTACCGGCGNRG  | GcttCGAGCGGggaGACaCGGCTGG | + | 5 | 2 | 0 | 2.75 | 1.38 |
| Chr3:29061998-29062020    | 29062016  | 2 | RNA | GGCCGAGGTCGACTACCGGCGNRG  | GGCGAAtTtGACaCa-CCGCGG    | + | 5 | 2 | 0 | 2.75 | 1.38 |
| Chr1:41943708-41943730    | 41943724  | 4 | RNA | GGCCGAGGTCGACTACCGGCGNRG  | GGCCaHTGcGCTTC-CCGCG      | + | 5 | 2 | 0 | 2.75 | 1.38 |
| Chr8:138785201-138785223  | 138785219 | 2 | RNA | GGCCGAGGTCGACTACCGGCGNRG  | GaCaAGcTC-GACaACCGGaAG    | + | 5 | 1 | 0 | 2.75 | 1.38 |
| Chr5:20511163-20511185    | 20511180  | 3 | RNA | GGCCGAGGTCGACTACCGGCGNRG  | GGTCGAtgagGACaCC-CCAG     | + | 5 | 2 | 0 | 2.75 | 1.38 |
| Chr7:129542768-129542790  | 129542783 | 5 | RNA | GGCCGAGGTCGACTACCGGCGNRG  | GGGcGAGGgGCaCaAaGtGCGAG   | + | 5 | 1 | 0 | 2.75 | 1.38 |
| Chr2:183741875-183741897  | 183741893 | 2 | RNA | GGCCGAGGTCGACTACCGGCGNRG  | a-CGgGTCGAGtCaAGaGCGG     | - | 5 | 2 | 0 | 2.75 | 1.38 |
| Chr6:10901384-10901406    | 10901399  | 5 | RNA | GGCCGAGGTCGACTACCGGCGNRG  | GGtGcGgTCGACTA-GGtTGG     | + | 5 | 2 | 0 | 2.75 | 1.38 |
| Chr7:53803649-53803671    | 53803664  | 5 | RNA | GGCCGAGGTCGACTACCGGCGNRG  | GGC-TtGcgAGTACCGCTGG      | + | 5 | 2 | 0 | 2.75 | 1.38 |
| Chr4:127578360-127578382  | 127578377 | 3 | X   | GGCCGAGGTCGACTACCGGCGNRG  | GGAaGAGGTGgcTAGcGGCTGG    | + | 5 | 0 | 0 | 2.75 | 1.38 |
| Chr6:157417855-157417877  | 157417871 | 4 | DNA | GG-CCGAGGTCGACTACCGGCGNRG | GGCCGCGtGGTGGcTCtGcGCTGG  | + | 5 | 2 | 0 | 2.75 | 1.38 |
| Chr3:43512456-43512478    | 43512474  | 2 | RNA | GGCCGAGGTCGACTACCGGCGNRG  | GG-GAaGggGACaAGCGGCTGG    | + | 5 | 2 | 0 | 2.75 | 1.38 |
| Chr2:186668118-186668140  | 186668136 | 2 | RNA | GGCCGAGGTCGACTACCGGCGNRG  | GGC-tcGgGACTACGCGTGG      | + | 5 | 2 | 0 | 2.75 | 1.38 |
| Chr1:166206945-166206967  | 166206950 | 3 | RNA | GGCCGAGGTCGACTACCGGCGNRG  | G-aCGGgGTCGACaCaCgagCGGG  | + | 5 | 1 | 0 | 2.75 | 1.38 |
| Chr1:205588764-205588786  | 205588771 | 5 | RNA | GGCCGAGGTCGACTACCGGCGNRG  | aGCCGAGGtGGcCT-cGgGCTGG   | - | 5 | 1 | 0 | 2.75 | 1.38 |
| Chr3:115593458-115593480  | 115593463 | 3 | RNA | GGCCGAGGTCGACTACCGGCGNRG  | cCGCG-GGcGAGtTCGCGGAG     | + | 5 | 1 | 0 | 2.75 | 1.38 |
| Chr8:119783066-119783088  | 119783071 | 3 | RNA | GGCCGAGGTCGACTACCGGCGNRG  | GGC-ttGtCACTACCGGCGNRG    | - | 5 | 1 | 0 | 2.75 | 1.38 |
| Chr6:170578096-170578118  | 170578112 | 4 | RNA | GGCCGAGGTCGACTACCGGCGNRG  | G-aCGAGTTCGACaCaAaGgCGG   | + | 4 | 1 | 0 | 2.75 | 1.38 |
| Chr1:56665462-56665484    | 56665477  | 5 | RNA | GGCCGAGGTCGACTACCGGCGNRG  | GAGc-AGGcCGAGcACaGCGCG    | + | 5 | 1 | 0 | 2.75 | 1.38 |
| Chr6:5030952-5030974      | 5030970   | 2 | RNA | GGCCGAGGTCGACTACCGGCGNRG  | GACGAGAGCaAagg-CCGCAAG    | + | 5 | 2 | 0 | 2.75 | 1.38 |
| Chr8:133099564-133099586  | 133099581 | 3 | DNA | GGCCGAGGTCGACTACCC-GCGNRG | GGcGAGAtTcTtcCCGAGGcCGG   | + | 5 | 2 | 0 | 2.75 | 1.38 |
| Chr5:24782159-24782181    | 24782174  | 5 | RNA | GGCCGAGGTCGACTACCGGCGNRG  | GGC-tcGgGACTACCGTCTGG     | + | 5 | 2 | 0 | 2.75 | 1.38 |
| Chr2:152935761-152935783  | 152935766 | 3 | RNA | GGCCGAGGTCGACTACCGGCGNRG  | aGC-AGcgGACTTCGgAGG       | - | 5 | 2 | 0 | 2.75 | 1.38 |
| Chr4:13285912-13285934    | 13285917  | 3 | RNA | GGCCGAGGTCGACTACCGGCGNRG  | G-aCGGgGTCGACaCaCgagCGGG  | - | 5 | 1 | 0 | 2.75 | 1.38 |
| Chr7:171631366-171631388  | 171631381 | 3 | RNA | GGCCGAGGTCGACTACCGGCGNRG  | GgaGAGGTCGAT-CCGGAATG     | - | 5 | 2 | 0 | 2.75 | 1.38 |
| Chr7:129045322-129045344  | 129045327 | 3 | RNA | GGCCGAGGTCGACTACCGGCGNRG  | GGGcGGGTCGAGgAaCa-CGGG    | - | 5 | 1 | 0 | 2.75 | 1.38 |
| Chr8:99323920-99323942    | 99323936  | 4 | RNA | GGCCGAGGTCGACTACCGGCGNRG  | GGCCGAGAGGgTC-TGgGCTGG    | - | 5 | 2 | 0 | 2.75 | 1.38 |
| Chr2:44189994-44190016    | 44190000  | 4 | RNA | GGCCGAGGTCGACTACCGGCGNRG  | GggCGgGTCGCT-CCGgAGG      | - | 5 | 1 | 0 | 2.75 | 1.38 |
| Chr8:101358178-101358200  | 101358195 | 3 | RNA | GGCCGAGGTCGACTACCGGCGNRG  | GcTCAGtcCGAC-CCGTCAG      | + | 5 | 2 | 0 | 2.75 | 1.38 |
| Chr6:44061726-44061748    | 44061743  | 3 | RNA | GGCCGAGGTCGACTACCGGCGNRG  | GGC-GAGGTCaACaCgGgTAG     | + | 5 | 1 | 0 | 2.75 | 1.38 |
| Chr8:140926581-140926603  | 140926598 | 3 | RNA | GGCCGAGGTCGACTACCGGCGNRG  | GGCaAGAGaC-CTAGaGgGCGG    | + | 5 | 2 | 0 | 2.75 | 1.38 |
| Chr1:35686356-35686378    | 35686372  | 4 | RNA | GGCCGAGGTCGACTACCGGCGNRG  | GGaCGAGG-GCcACCGcCGG      | + | 4 | 1 | 0 | 2.75 | 1.38 |
| Chr1:251452902-251452924  | 251452919 | 3 | DNA | GGCCGAGGTCG-ACTACCGGCGNRG | GGCCGAGcAGAAcGcCGGCTGG    | + | 5 | 1 | 0 | 2.75 | 1.38 |
| Chr5:153755342-153755364  | 153755360 | 2 | RNA | GGCCGAGGTCGACTACCGGCGNRG  | GAGcAGGTCG-TtGcGaaAGG     | + | 5 | 2 | 0 | 2.75 | 1.38 |
| Chr4:71622045-71622067    | 71622051  | 4 | RNA | GGCCGAGGTCGACTACCGGCGNRG  | GaCCGAGG-CCAGCaAaagaAGG   | - | 5 | 1 | 0 | 2.75 | 1.38 |
| Chr5:14166142-14166164    | 14166160  | 2 | RNA | GGCCGAGGTCGACTACCGGCGNRG  | GG-aGAGTCGcGcAGGaGAT      | + | 5 | 2 | 0 | 2.75 | 1.38 |
| Chr10:129635891-129635913 | 129635897 | 4 | RNA | GGCCGAGGTCGACTACCGGCGNRG  | GGCCGAGGTCGACTACCGGCGNRG  | - | 5 | 1 | 0 | 2.75 | 1.38 |
| Chr7:26792873-26792895    | 26792889  | 4 | RNA | GGCCGAGGTCGACTACCGGCGNRG  | GGC-AGGcCGAGcACaGaAGG     | - | 5 | 2 | 0 | 2.75 | 1.38 |
| Chr1:138278932-138278954  | 138278947 | 5 | RNA | GGCCGAGGTCGACTACCGGCGNRG  | gcCCGcGTGCGcCACCG-CCGG    | + | 5 | 1 | 0 | 2.75 | 1.38 |
| Chr2:2226813-2226835      | 22268028  | 5 | RNA | GGCCGAGGTCGACTACCGGCGNRG  | GGC-tcGgGACTACCGCTGG      | + | 4 | 2 | 0 | 2.75 | 1.38 |
| Chr2:182782102-182782124  | 182782117 | 5 | RNA | GGCCGAGGTCGACTACCGGCGNRG  | GCGAGGcGCGACTA-GGaAGG     | + | 5 | 2 | 0 | 2.75 | 1.38 |
| Chr2:149090399-149090421  | 149090417 | 2 | RNA | GGCCGAGGTCGACTACCGGCGNRG  | GGC-tcGgGACTACCGTCTGG     | + | 5 | 2 | 0 | 2.75 | 1.38 |
| Chr3:810172-810194        | 810177    | 3 | RNA | GGCCGAGGTCGACTACCGGCGNRG  | cGtCGA-TCAaCTcaGGCCAG     | - | 5 | 2 | 0 | 2.75 | 1.38 |
| Chr1:238778460-238778482  | 238778466 | 4 | RNA | GGCCGAGGTCGACTACCGGCGNRG  | cGaGAGTCAATCaC-CCAG       | - | 5 | 2 | 0 | 2.75 | 1.38 |
| Chr5:174122720-174122742  | 174122737 | 3 | RNA | GGCCGAGGTCGACTACCGGCGNRG  | GGcGAGGTCG-TtGcGaaAG      | + | 5 | 2 | 0 | 2.75 | 1.38 |
| Chr6:4549881-4549903      | 4549888   | 5 | RNA | GGCCGAGGTCGACTACCGGCGNRG  | GGC-GAaATCGACgCGGAGG      | - | 5 | 1 | 0 | 2.75 | 1.38 |
| Chr8:11223615-112236127   | 112236122 | 3 | RNA | GGCCGAGGTCGACTACCGGCGNRG  | GCaAGAGGTC-GaCAGTCCGAGG   | - | 5 | 2 | 0 | 2.75 | 1.38 |
| Chr2:26206648-26206670    | 26206655  | 5 | RNA | GGCCGAGGTCGACTACCGGCGNRG  | GtGcGgGTCGCT-CCGCGCGG     | - | 5 | 2 | 0 | 2.75 | 1.38 |
| Chr1:12003580-12003602    | 12003595  | 5 | RNA | GGCCGAGGTCGACTACCGGCGNRG  | GtGTC-GTCACTcOGGgaAAG     | + | 5 | 2 | 0 | 2.75 | 1.38 |
| Chr9:124681722-124681744  | 124681727 | 3 | RNA | GGCCGAGGTCGACTACCGGCGNRG  | GGtcAGGTaAGaaA-GGCAG      | - | 5 | 2 | 0 | 2.75 | 1.38 |
| Chr4:18429693-18429715    | 18429697  | 2 | RNA | GGCCGAGGTCGACTACCGGCGNRG  | G-CaAGGTCAaATCaGaGAG      | + | 5 | 1 | 0 | 2.75 | 1.38 |
| Chr1:254308288-254308310  | 254308303 | 5 | RNA | GGCCGAGGTCGACTACCGGCGNRG  | GGCCAtGaGc-TtTGCGCGG      | + | 5 | 2 | 0 | 2.75 | 1.38 |
| Chr6:171867766-171867788  | 171867781 | 5 | RNA | GGCCGAGGTCGACTACCGGCGNRG  | GGAc-AGGTGCGAGgAa         |   |   |   |   |      |      |

|                           |           |   |     |                             |                           |   |   |   |   |      |      |
|---------------------------|-----------|---|-----|-----------------------------|---------------------------|---|---|---|---|------|------|
| Chr10:75795316-75795338   | 75795333  | 3 | RNA | GGCCGAGGTCGACTACCGGCGNRG    | GcGcAGcctGAC--CCGCAAG     | + | 5 | 2 | 0 | 2.75 | 1.38 |
| Chr5:133413000-133413022  | 133413006 | 4 | RNA | GGCCGAGGTCGACTACCGGCGNRG    | GgtGAGGcGaCAATcA--CCGG    | - | 5 | 2 | 0 | 2.75 | 1.38 |
| Chr4:243565738-243565760  | 243565742 | 2 | RNA | GGCCGAGGTCGACTACCGGCGNRG    | GGCCGAGgtGcGACTIC-GGCGAG  | - | 5 | 1 | 0 | 2.75 | 1.38 |
| Chr8:38783048-38783070    | 38783064  | 4 | RNA | GGCCGAGGTCGACTACCGGCGNRG    | GtgCGAtG-CGcTgCCGGCCGG    | + | 5 | 1 | 0 | 2.75 | 1.38 |
| Chr9:133812211-133812233  | 133812227 | 4 | RNA | GGCCGAGGTCGACTACCGGCGNRG    | G-aCGGgGTCTGCAaCaGgaCGGG  | + | 5 | 1 | 0 | 2.75 | 1.38 |
| Chr2:16595188-16595210    | 16595203  | 5 | RNA | GGCCGAGGTCGACTACCGGCGNRG    | GGcCAAGG--GACTAAAGCTGG    | + | 5 | 2 | 0 | 2.75 | 1.38 |
| Chr7:64593047-64593069    | 64593064  | 3 | RNA | GGCCGAGGTCGACTACCGGCGNRG    | GGcCAAGcctCGACTIC--GCCAG  | + | 5 | 2 | 0 | 2.75 | 1.38 |
| Chr2:50610977-50610999    | 50610995  | 2 | RNA | GGCCGAGGTCGACTACCGGCGNRG    | GGTCGAGGTGCG--TggCcGCGGG  | + | 4 | 2 | 0 | 2.75 | 1.38 |
| Chr5:171048843-171048865  | 171048848 | 3 | RNA | GGCCGAGGTCGACTACCGGCGNRG    | GGtCcAcG--GACTCAgHCTGG    | - | 5 | 2 | 0 | 2.75 | 1.38 |
| Chr3:129227775-129227797  | 129227782 | 5 | RNA | GGCCGAGGTCGACTACCGGCGNRG    | GcaCGAG--CGaATCaGgaTAG    | - | 5 | 2 | 0 | 2.75 | 1.38 |
| Chr1:245550493-245550515  | 245550511 | 2 | RNA | GGCCGAGGTCGACTACCGGCGNRG    | GCG--AGGcCAggtCTCGGCGGG   | + | 5 | 2 | 0 | 2.75 | 1.38 |
| Chr2:45460337-45460359    | 45460355  | 2 | RNA | GGCCGAGGTCGACTACCGGCGNRG    | GggCGAGGgaC--GgAGaGGCGAG  | + | 5 | 2 | 0 | 2.75 | 1.38 |
| Chr5:222727445-222727467  | 222727450 | 3 | RNA | GGCCGAGGTCGACTACCGGCGNRG    | GGCaGcGGTCTGAC-ggCGgCGG   | - | 5 | 1 | 0 | 2.75 | 1.38 |
| Chr4:188318694-188318716  | 188318699 | 3 | RNA | GGCCGAGGTCGACTACCGGCGNRG    | G-aCGGgGTCTGCAaCaGgaCGGG  | - | 5 | 1 | 0 | 2.75 | 1.38 |
| Chr3:201853421-201853443  | 201853427 | 4 | RNA | GGCCGAGGTCGACTACCGGCGNRG    | aGCCctGCTGCAT--CgCTCGG    | - | 5 | 2 | 0 | 2.75 | 1.38 |
| Chr8:78781894-78781916    | 78781900  | X | RNA | GGCCGAGGTCGACTACCGGCGNRG    | GgaAGAGGTGGCTAGcGCTGG     | - | 5 | 0 | 1 | 1.65 | 1.33 |
| Chr5:28634198-28634220    | 28634205  | 5 | RNA | GGCCGAGGTCGACTACCGGCGNRG    | GGCtGcGCTagcCT-CGCGCGAG   | - | 5 | 1 | 1 | 1.65 | 1.33 |
| Chr3:198373903-198373925  | 198373919 | 4 | RNA | GGCCGAGGTCGACTACCGGCGNRG    | G-aCGGgGcGgGAGCAGCGCGGG   | + | 4 | 1 | 1 | 1.65 | 1.33 |
| Chr3:211808730-211808752  | 211808748 | 2 | RNA | GGCCGAGGTCGACTACCGGCGNRG    | tGgCGAGcTca--TACCGGCCGG   | + | 5 | 2 | 1 | 1.65 | 1.33 |
| Chr1:122460244-122460266  | 122460248 | 2 | RNA | GGCCGAGGTCGACTACCGGCGNRG    | GaCaaAGGaatACCT-CGGCGAG   | - | 5 | 1 | 2 | 0.55 | 1.28 |
| Chr6:20347024-20347046    | 20347041  | 3 | DNA | GGC-CGAGGTGCTACTACCGGCGNRG  | GGCTCGGtGcGCTICCTCGGTGG   | + | 5 | 1 | 2 | 0.55 | 1.28 |
| Chr5:11477335-11477357    | 11477341  | 4 | RNA | GGCCGAGGTCGACTACCGGCGNRG    | G-aCGGgGTCTGCAaCaGgaCGGG  | - | 5 | 1 | 2 | 0.55 | 1.28 |
| Chr1:91102570-91102592    | 91102576  | 4 | RNA | GGCCGAGGTCGACTACCGGCGNRG    | GGCCGCGcgCG--GgGCGCGG     | - | 5 | 2 | 0 | 2.20 | 1.10 |
| Chr4:40308772-40308794    | 40308778  | 4 | RNA | GGCCGAGGTCGACTACCGGCGNRG    | GgGCGAaGtGACT--CGgGCGG    | - | 5 | 2 | 0 | 2.20 | 1.10 |
| Chr1:141832898-141832920  | 141832914 | 4 | RNA | GGCCGAGGTCGACTACCGGCGNRG    | GtCCGgaGTI--CTTCCGCTGG    | + | 5 | 2 | 0 | 2.20 | 1.10 |
| Chr10:25201964-25201986   | 25201969  | 3 | RNA | GGCCGAGGTCGACTACCGGCGNRG    | G-aCGGgGTCTGCAaCaGgaCGGG  | + | 5 | 1 | 0 | 2.20 | 1.10 |
| Chr7:70569246-70569268    | 70569251  | 3 | DNA | GGC--CGAGGTGCTACTACCGGCGNRG | GGCTCGGtGCGtAaCacCGGCGGG  | - | 5 | 2 | 0 | 2.20 | 1.10 |
| Chr5:216940342-216940364  | 216940347 | 3 | RNA | GGCCGAGGTCGACTACCGGCGNRG    | GGC-GGcCaCtCTCCGCGCGG     | - | 5 | 1 | 0 | 2.20 | 1.10 |
| Chr5:84347854-84347876    | 84347859  | 3 | X   | GGCCGAGGTCGACTACCGGCGNRG    | GGAaGAGCTCGgAGgCGGCAAG    | - | 5 | 0 | 0 | 2.20 | 1.10 |
| Chr1:115548034-115548056  | 115548050 | 4 | RNA | GGCCGAGGTCGACTACCGGCGNRG    | GGGAGAGGgG--GctTACCGGCGGG | + | 4 | 1 | 0 | 2.20 | 1.10 |
| Chr7:48721400-48721422    | 48721416  | 4 | RNA | GGCCGAGGTCGACTACCGGCGNRG    | cg--GAGGgaAGaATCcGCTGG    | + | 5 | 2 | 0 | 2.20 | 1.10 |
| Chr8:23077540-23077562    | 23077547  | 5 | RNA | GGCCGAGGTCGACTACCGGCGNRG    | GGAaGAtCTG--TAgaaGGCGAG   | - | 5 | 2 | 0 | 2.20 | 1.10 |
| Chr7:114036794-114036816  | 114036811 | 3 | DNA | GGC-CGAGGTGCTACTACCGGCGNRG  | GGCTCAGAGGcGtCTCCGCTGG    | + | 4 | 1 | 0 | 2.20 | 1.10 |
| Chr3:20538837-20538859    | 20538841  | 2 | RNA | GGCCGAGGTCGACTACCGGCGNRG    | GTCCG--GTgTCAACCGGaaAG    | - | 5 | 2 | 0 | 2.20 | 1.10 |
| Chr4:202411281-202411303  | 202411298 | 3 | RNA | GGCCGAGGTCGACTACCGGCGNRG    | GGCCG--GTgTCAACCGGaaAG    | + | 5 | 2 | 0 | 2.20 | 1.10 |
| Chr8:80758363-80758385    | 80758381  | 2 | RNA | GGCCGAGGTCGACTACCGGCGNRG    | GGC--gGCGAGGTGCTACTCGCGG  | + | 4 | 2 | 0 | 2.20 | 1.10 |
| Chr5:20358148-20358170    | 20358154  | 4 | RNA | GGCCGAGGTCGACTACCGGCGNRG    | GGAaCAGGTGG--TcTcaGtTGG   | - | 5 | 2 | 0 | 2.20 | 1.10 |
| Chr7:103576040-103576062  | 103576046 | 4 | RNA | GGCCGAGGTCGACTACCGGCGNRG    | aGcAGAGGTCHCT--CGGCGAG    | - | 4 | 2 | 0 | 2.20 | 1.10 |
| Chr6:139959918-139959940  | 139959933 | 5 | RNA | GGCCGAGGTCGACTACCGGCGNRG    | GGC--tcGcgGACTACCGGTGG    | + | 5 | 2 | 0 | 2.20 | 1.10 |
| Chr7:62338175-62338197    | 62338190  | 5 | RNA | GGCCGAGGTCGACTACCGGCGNRG    | GGCGAGaTGAaCctCa--CCGG    | + | 5 | 2 | 0 | 2.20 | 1.10 |
| Chr1:121232818-121232840  | 121232825 | 5 | RNA | GGCCGAGGTCGACTACCGGCGNRG    | GGtCGAG--CGaTggCGGCGGG    | + | 5 | 2 | 0 | 2.20 | 1.10 |
| Chr5:153362641-153362663  | 153362659 | 2 | RNA | GGCCGAGGTCGACTACCGGCGNRG    | GGCCGAGGa--AaAGcGcCGAG    | + | 5 | 2 | 0 | 2.20 | 1.10 |
| Chr2:105895567-105895589  | 105895583 | 4 | RNA | GGCCGAGGTCGACTACCGGCGNRG    | cGgCGAGGa--ACcAGtGtCGGG   | + | 5 | 2 | 0 | 2.20 | 1.10 |
| Chr3:181915416-181915438  | 181915433 | 3 | RNA | GGCCGAGGTCGACTACCGGCGNRG    | GGC--tcGcgGACTACCGGCTGG   | + | 4 | 2 | 0 | 2.20 | 1.10 |
| Chr6:160902460-160902482  | 160902465 | 3 | RNA | GGCCGAGGTCGACTACCGGCGNRG    | G-CGAGGAGcCGgAGgCGGCGG    | - | 5 | 1 | 0 | 2.20 | 1.10 |
| Chr2:427186509-427186531  | 427186513 | 2 | RNA | GGCCGAGGTCGACTACCGGCGNRG    | GGCCGAGGTCGAGaGgaAGaAGG   | - | 5 | 1 | 0 | 2.20 | 1.10 |
| Chr10:60737498-60737520   | 60737515  | 3 | RNA | GGCCGAGGTCGACTACCGGCGNRG    | caCaaAGG--GAATCAaGtCAAG   | + | 5 | 2 | 0 | 2.20 | 1.10 |
| Chr4:83929226-83929248    | 83929231  | 3 | RNA | GGCCGAGGTCGACTACCGGCGNRG    | ttCGCGAGGTCTGcgCgCT--GCCG | + | 4 | 2 | 0 | 2.20 | 1.10 |
| Chr1:15964999-15965021    | 15965005  | 4 | RNA | GGCCGAGGTCGACTACCGGCGNRG    | GGCaAGG-GCGgAGCgaCAAG     | - | 5 | 1 | 0 | 2.20 | 1.10 |
| Chr4:45643856-45643878    | 45643871  | 5 | RNA | GGCCGAGGTCGACTACCGGCGNRG    | GcgCGAGGcCGA--ACgGGCGGG   | + | 4 | 2 | 0 | 2.20 | 1.10 |
| Chr3:23439613-23439635    | 23439617  | 2 | RNA | GGCCGAGGTCGACTACCGGCGNRG    | GTCCG--GTgTCAACCGGaTAG    | - | 5 | 2 | 0 | 2.20 | 1.10 |
| Chr2:146215252-146215274  | 146215258 | 4 | RNA | GGCCGAGGTCGACTACCGGCGNRG    | GaCCGAtcCCAGaACCG-CCAG    | - | 5 | 1 | 0 | 2.20 | 1.10 |
| Chr2:151785958-151785980  | 151785973 | 5 | RNA | GGCCGAGGTCGACTACCGGCGNRG    | G-CCGgGTCTGcGTcgGtGtCAG   | + | 5 | 1 | 0 | 2.20 | 1.10 |
| Chr2:53620626-53620648    | 53620632  | 4 | DNA | GGCCGA-GGTGCGACTACCGGCGNRG  | GgGgGACCGGTCTcgAGcAGGaCAG | - | 5 | 1 | 0 | 2.20 | 1.10 |
| Chr2:101555183-101555205  | 101555187 | 2 | DNA | GGCCGAGGTCGACTACCGGCGNRG    | GGCCGAGGTCTGcGgGtGGGCGG   | - | 5 | 2 | 0 | 2.20 | 1.10 |
| Chr2:162836192-162836214  | 162836198 | 4 | RNA | GGCCGAGGTCGACTACCGGCGNRG    | GGC--AGGCaGAGGTGCTCGCTGG  | - | 5 | 1 | 0 | 2.20 | 1.10 |
| Chr1:196762091-196762113  | 196762106 | 5 | DNA | GGC--CGAGGTGCTACTACCGGCGNRG | cGcGAGAGGTGGTCTGCaAGcAGG  | + | 5 | 2 | 0 | 2.20 | 1.10 |
| Chr3:206541231-206541253  | 206541237 | 4 | RNA | GGCCGAGGTCGACTACCGGCGNRG    | GGC--tcGcgGATTACCGGCTGG   | + | 5 | 2 | 0 | 2.20 | 1.10 |
| Chr6:17339644-17339666    | 17339648  | 2 | DNA | GGCCGAGGTCGACTACCGGCGNRG    | tGCGCAAGtTCAACCGTcGcgGgAG | - | 5 | 2 | 0 | 2.20 | 1.10 |
| Chr1:116457339-116457361  | 116457345 | 4 | RNA | GGCCGAGGTCGACTACCGGCGNRG    | GGCaGgaTAgcCT--CGGCGGG    | - | 5 | 2 | 0 | 2.20 | 1.10 |
| Chr10:110164474-110164496 | 110164481 | 5 | RNA | GGCCGAGGTCGACTACCGGCGNRG    | GGCCAGGgGtGgaAGAC--atGG   | - | 4 | 2 | 0 | 2.20 | 1.10 |
| Chr5:98942464-98942486    | 98942471  | 5 | RNA | GGCCGAGGTCGACTACCGGCGNRG    | GGCCGAGGaGcGtT--CaGcAGG   | - | 5 | 2 | 0 | 2.20 | 1.10 |
| Chr8:64697155-64697177    | 64697162  | 5 | RNA | GGCCGAGGTCGACTACCGGCGNRG    | GgGCGgGTtGgCT-CGCGgaAGG   | - | 5 | 1 | 0 | 2.20 | 1.10 |
| Chr9:70823798-70823820    | 70823814  | 4 | RNA | GGCCGAGGTCGACTACCGGCGNRG    | GGCaAtHtG-CGgCAaCCGGCAAG  | + | 5 | 1 | 0 | 2.20 | 1.10 |
| Chr6:42712995-42713017    | 42712999  | 2 | RNA | GGCCGAGGTCGACTACCGGCGNRG    | GGtCGAGgaacctTA--GGCCAG   | - | 5 | 2 | 0 | 2.20 | 1.10 |
| Chr4:168633778-16863381   | 168633794 | 4 | RNA | GGCCGAGGTCGACTACCGGCGNRG    | GcgCGAGGTGAGaGgaAGGAGG    | - | 5 | 1 | 0 | 2.20 | 1.10 |
| Chr2:166363664-166363686  | 166363691 | 3 | RNA | GGCCGAGGTCGACTACCGGCGNRG    | GgGcGcGGTCAaCTgC--GagAG   | + | 5 | 1 | 0 | 2.20 | 1.10 |
| Chr4:36465107-36465129    | 36465123  | 3 | RNA | GGCCGAGGTCGACTACCGGCGNRG    | GGCCGcGT--GAjTCAaAGRGAG   | + | 5 | 1 | 0 | 2.20 | 1.10 |
| Chr3:190137786-190137808  | 190137804 | 2 | RNA | GGCCGAGGTCGACTACCGGCGNRG    | GGCCG-GGcCaCTaCGGCGGG     | + | 5 | 1 | 0 | 2.20 | 1.10 |
| Chr8:173555957-173555979  | 173555963 | 4 | RNA | GGCCGAGGTCGACTACCGGCGNRG    | aGGCGAGGaGtCT--CGgGAG     | - | 5 | 2 | 0 | 2.20 | 1.10 |
| Chr8:40897227-40897249    | 40897243  | 4 | RNA | GGCCGAGGTCGACTACCGGCGNRG    | cGCCAGTCTG--TAgCGtGGG     | + | 5 | 2 | 0 | 2.20 | 1.10 |
| Chr9:68573271-68573293    | 68573288  | 3 | RNA | GGCCGAGGTCGACTACCGGCGNRG    | GGAaCAGTGG--TcTcaGtTGG    | + | 5 | 2 | 0 | 2.20 | 1.10 |
| Chr2:3354111-3354113      | 3354127   | 4 | RNA | GGCCGAGGTCGACTACCGGCGNRG    | cGCCGAGgggAGaaG--GCTGG    | + | 5 | 2 | 0 | 2.20 | 1.10 |
| Chr3:182620682-182620704  | 182620699 | 3 | RNA | GGCCGAGGTCGACTACCGGCGNRG    | GGC--tcGcgGACTACCGGCTGG   | + | 4 | 2 | 0 | 2.20 | 1.10 |
| Chr1:13638939-13638961    | 13638945  | 4 | RNA | GGCCGAGGTCGACTACCGGCGNRG    | GCTCtGtCaACT--CGGCGAG     | - | 5 | 2 | 0 | 2.20 | 1.10 |
| Chr6:133118535-133118557  | 133118540 | 3 | RNA | GGCCGAGGTCGACTACCGGCGNRG    | GCC--tcGcgGACTACCGGCTGG   | + | 4 | 2 | 0 | 2.20 | 1.10 |
| Chr7:77522969-77522991    | 77522976  | 5 | RNA | GGCCGAGGTCGACTACCGGCGNRG    | GGGAGcAGTCTCACT-CaCGGAG   | + | 5 | 1 | 0 | 2.20 | 1.10 |
| Chr6:78565157-78565179    | 78565172  | 5 | RNA | GGCCGAGGTCGACTACCGGCGNRG    | GHtGAGaT--AaTACGtCTGG     | + | 5 | 2 | 0 | 2.20 | 1.10 |
| Chr2:140635144-140635166  | 140635150 | 4 | RNA | GGCCGAGGTCGACTACCGGCGNRG    | GGAaCGAGcGACTA--tGaTAG    | - | 5 | 2 | 0 | 2.20 | 1.10 |
| Chr2:68204360-68204382    | 68204364  | 2 | RNA | GGCCGAGGTCGACTACCGGCGNRG    | GGAaCGAGCaGcCT--CgGgaTGG  | - | 5 | 1 | 0 | 2.20 | 1.10 |
| Chr9:134814353-134814375  | 134814369 | 4 | RNA | GGCCGAGGTCGACTACCGGCGNRG    | GgtTtgGtGTCTGCT--CGgGAG   | + | 5 | 2 | 0 | 2.20 | 1.10 |
| Chr7:90520160-90520182    | 90520178  | 2 | RNA | GGCCGAGGTCGACTACCGGCGNRG    | acCCAGaGTGAATaC--CCGG     | + | 5 | 2 | 0 | 2.20 | 1.10 |
| Chr10:90152598-90152620   | 90152605  | 5 | RNA | GGCCGAGGTCGACTACCGGCGNRG    | GggGAGAGgCGA--AGCGGCCGG   | - | 5 | 2 | 0 | 2.20 | 1.10 |
| Chr2:224205374-224205396  | 224205389 | 5 | RNA | GGCCGAGGTCGACTACCGGCGNRG    | GgGcG-GGcCaACcCtCGGCGAG   | + | 5 | 1 | 0 | 2.20 | 1.10 |
| Chr5:169614276-169614298  | 169614292 | 4 | RNA | GGCCGAGGTCGACTACCGGCGNRG    | G-aCGGgGTCTGCAaCaGgaCGGG  | + | 5 | 1 | 0 | 2.20 | 1.10 |
| Chr4:5974561-5974563      | 5974562   | 2 | RNA | GGCCGAGGTCGACTACCGGCGNRG    | G-aCGGAGGTGCT--TcTcaGtTGG | + | 5 | 2 | 0 | 2.20 | 1.10 |
| Chr8:36653470-36653492    | 36653476  | 4 | DNA | GGC-CGAGGTGCTACTACCGGCGNRG  | GCTCGAGGcGtCTCaGtCTGG     | - | 5 | 1 | 0 | 2.20 | 1.10 |
| Chr1:118844117-118844139  | 118844122 | 3 | DNA | GGCCGAGGTCGACTACCGGCGNRG    | GGtCGAGGTCTGCAGtAgtcGCGGG | - | 4 | 1 | 0 | 2.20 | 1.10 |
| Chr2:84659413-84659435    | 84659431  | 3 | RNA | GGCCGAGGTCGACTACCGGCGNRG    | GGCCGAGcgCGA--AggGgGAG    | + | 5 | 2 | 0 | 2.20 | 1.10 |
| Chr6:71113471-71113493    | 71113489  | 2 | RNA | GGCCGAGGTCGACTACCGGCGNRG    | GGCCGAGaTgGA--ACTGgaAG    | + | 5 | 2 | 0 | 2.20 | 1.10 |
| Chr4:38243720-38243742    | 38243738  | 2 | RNA | GGCCGAGGTCGACTACCGGCGNRG    | GGAaCAGTGG--TcTcaGtTGG    | + | 5 | 2 | 0 | 2.20 | 1.10 |
| Chr1:121532612-121532634  | 121532618 | 4 | RNA | GGCCGAGGTCG                 |                           |   |   |   |   |      |      |

|                           |   |     |                             |                            |   |   |   |   |      |      |
|---------------------------|---|-----|-----------------------------|----------------------------|---|---|---|---|------|------|
| Chr8:47843164-47843186    | 4 | RNA | GGCCGAGGTCGACTACCGGCGNRG    | GGCCGgGtGgCTgTg-GGCTGG     | - | 5 | 2 | 0 | 2.20 | 1.10 |
| Chr5:209544940-209544962  | 3 | DNA | GG-CCGAGGTCGACTACCGGCGNRG   | GGACCCACaTtCAcTACcAGcCAGG  | - | 5 | 2 | 0 | 2.20 | 1.10 |
| Chr5:204417049-204417071  | 5 | RNA | GGCCGAGGTCGACTACCGGCGNRG    | g-aCGgGGTCGACaCaGgaCGCGG   | - | 5 | 1 | 0 | 2.20 | 1.10 |
| Chr3:203539718-203539720  | 2 | RNA | GGCCGAGGTCGACTACCGGCGNRG    | g-CGAGTCGGcCAcTcCGCG       | - | 4 | 2 | 0 | 2.20 | 1.10 |
| Chr4:79045468-79045490    | 2 | RNA | GGCCGAGGTCGACTACCGGCGNRG    | caCCCGAGTCGAGTA-GGCGGAG    | - | 5 | 2 | 0 | 2.20 | 1.10 |
| Chr4:73255875-73255893    | 2 | RNA | GGCCGAGGTCGACTACCGGCGNRG    | tg-GAGGTCGAGTCACCGGCG      | + | 5 | 2 | 0 | 2.20 | 1.10 |
| Chr4:241491382-241491304  | 2 | RNA | GGCCGAGGTCGACTACCGGCGNRG    | gG-CGAGGTCG-TTGgaGaaAG     | + | 5 | 2 | 0 | 2.20 | 1.10 |
| Chr10:127161537-127161559 | 2 | DNA | GG-CCGAGGTCGACTACCGGCGNRG   | GGTCCCAGAGTTCGAtacCcttCGGG | + | 5 | 2 | 0 | 2.20 | 1.10 |
| Chr1:286188610-286188632  | 3 | RNA | GGCCGAGGTCGACTACCGGCGNRG    | GGCCGAGctcGAGctcc-CGGG     | - | 5 | 2 | 0 | 2.20 | 1.10 |
| Chr1:204172671-204172693  | 2 | RNA | GGCCGAGGTCGACTACCGGCGNRG    | GGCGAGGcCGAgT-CGgGGG       | - | 5 | 2 | 0 | 2.20 | 1.10 |
| Chr10:43160552-43160574   | 4 | RNA | GGCCGAGGTCGACTACCGGCGNRG    | GGC-GAGGTCGAGgCGGGCGG      | + | 4 | 2 | 0 | 2.20 | 1.10 |
| Chr7:17750473-17750495    | 3 | DNA | GGCCGAGGTCGACTA-CCGGCGNRG   | ctCCaaGGGcGCAcAACTCCGGCAAG | - | 5 | 2 | 0 | 2.20 | 1.10 |
| Chr3:9960263-9960285      | 2 | RNA | GGCCGAGGTCGACTACCGGCGNRG    | GGCCG-cGCTCACTaCaGIAAG     | - | 5 | 1 | 0 | 2.20 | 1.10 |
| Chr10:120823197-120823219 | 2 | RNA | GGCCGAGGTCGACTACCGGCGNRG    | GGCCGAGGctcCT-CGgGCTGG     | - | 4 | 1 | 0 | 2.20 | 1.10 |
| Chr7:74586790-74586812    | 2 | DNA | GGCCGAGGTCGACTACCGGCGNRG    | GGCCGAGGTCGAggtCGGCGGAG    | + | 5 | 1 | 0 | 2.20 | 1.10 |
| Chr3:56717446-56717468    | 3 | DNA | GGCCGAGGTCGACTACCGGCGNRG    | GGCCGAGgCaCAACCTCGGCGAG    | - | 5 | 2 | 0 | 2.20 | 1.10 |
| Chr8:160479712-160479734  | 3 | RNA | GGCCGAGGTCGACTACCGGCGNRG    | GGCCG-GGTCActCACCGCGCGG    | - | 4 | 1 | 0 | 2.20 | 1.10 |
| Chr1:12064858-12064880    | 4 | RNA | GGCCGAGGTCGACTACCGGCGNRG    | GG-GAGGTCGAGcACCGGCGG      | - | 2 | 2 | 0 | 2.20 | 1.10 |
| Chr7:93432459-93432481    | 3 | DNA | GGCCGAGGTCGACTACCGGCGNRG    | GGtGCGGTGGGCAactCCGGCGAG   | + | 5 | 2 | 0 | 2.20 | 1.10 |
| Chr2:112185830-112185852  | 3 | DNA | GGC-CCGAGGTCGACTACCGGCGNRG  | GGCTCTGGGgGtCAcCccGGCGGG   | - | 5 | 2 | 0 | 2.20 | 1.10 |
| Chr7:19971692-19971714    | 3 | DNA | GGCCG-AGGTCGACTACCGGCGNRG   | GGtGTTAGTGGTCagCTACCTCCG   | - | 5 | 2 | 0 | 2.20 | 1.10 |
| Chr1:16101231-16101253    | 4 | RNA | GGCCGAGGTCGACTACCGGCGNRG    | aGCGAGGcGc-ACcttGgGCGAG    | - | 5 | 1 | 0 | 2.20 | 1.10 |
| Chr10:30147091-30147113   | 3 | RNA | GGCCGAGGTCGACTACCGGCGNRG    | g-CCGcGcGcCAaAcCGaCGAG     | + | 5 | 1 | 0 | 2.20 | 1.10 |
| Chr1:122440334-122440356  | 4 | RNA | GGCCGAGGTCGACTACCGGCGNRG    | GGCCG-CCcCACTCCGGCGAG      | + | 5 | 2 | 0 | 2.20 | 1.10 |
| Chr4:83007020-83007042    | 4 | RNA | GGCCGAGGTCGACTACCGGCGNRG    | GGCCCGAGctCGAG-CCaGgGGG    | + | 5 | 2 | 0 | 2.20 | 1.10 |
| Chr2:49908336-49908358    | 3 | RNA | GGCCGAGGTCGACTACCGGCGNRG    | GgGgAGTC-CTtCCGGCGAG       | + | 5 | 2 | 0 | 2.20 | 1.10 |
| Chr5:179981708-179981730  | 2 | RNA | GGCCGAGGTCGACTACCGGCGNRG    | GGCCGAGGcGg-cgCGCGGG       | + | 5 | 2 | 0 | 2.20 | 1.10 |
| Chr6:116352215-116352237  | 2 | RNA | GGCCGAGGTCGACTACCGGCGNRG    | GGC-CTGgGACTACCGGCTGG      | - | 4 | 2 | 0 | 2.20 | 1.10 |
| Chr1:54618101-54618123    | 3 | RNA | GGCCGAGGTCGACTACCGGCGNRG    | GGC-tGtTGACTACGtCTGG       | - | 4 | 2 | 0 | 2.20 | 1.10 |
| Chr3:142032089-142032111  | 5 | RNA | GGCCGAGGTCGACTACCGGCGNRG    | G-CAaGgACtAGTAgCGgGAG      | - | 4 | 2 | 0 | 2.20 | 1.10 |
| Chr1:116354814-116354836  | 3 | RNA | GGCCGAGGTCGACTACCGGCGNRG    | GGCCcAGcGgCG-ThTCGGCGG     | + | 5 | 2 | 0 | 2.20 | 1.10 |
| Chr4:47466419-47466441    | 4 | RNA | GGCCGAGGTCGACTACCGGCGNRG    | GGCCG-GTgTCAcCCAGGcAG      | - | 5 | 2 | 0 | 2.20 | 1.10 |
| Chr10:104950422-104950444 | 4 | RNA | GGCCGAGGTCGACTACCGGCGNRG    | GGC-AGGcCAgctCCGCGCAG      | + | 5 | 2 | 0 | 2.20 | 1.10 |
| Chr10:45567296-45567318   | 4 | DNA | G-GCCGAGGTCGACTACCGGCGNRG   | GGCCCGGtGGTGCATctCGgGtCAG  | + | 5 | 2 | 0 | 2.20 | 1.10 |
| Chr7:169893467-169893489  | 5 | RNA | GGCCGAGGTCGACTACCGGCGNRG    | GGCCGAGc-CCtCAcCaCGGCG     | + | 5 | 1 | 0 | 2.20 | 1.10 |
| Chr4:189289535-189289557  | 4 | RNA | GGCCGAGGTCGACTACCGGCGNRG    | GgaCGAGcGAGT-CGgGTATAG     | + | 5 | 2 | 0 | 2.20 | 1.10 |
| Chr8:42713073-42713095    | 4 | DNA | GGCCGAGGTCGACTACCGGCGNRG    | GGCCGAGtTCGACTACCCGAGCGG   | + | 5 | 2 | 0 | 2.20 | 1.10 |
| Chr3:225281898-225281920  | 5 | RNA | GGCCGAGGTCGACTACCGGCGNRG    | GcCaGgGAGcGcG-CCGCGCAG     | + | 5 | 2 | 0 | 2.20 | 1.10 |
| Chr5:214864117-214864139  | 2 | RNA | GGCCGAGGTCGACTACCGGCGNRG    | GGGCGGgGTAg-cACCGGAGG      | + | 5 | 2 | 0 | 2.20 | 1.10 |
| Chr9:102201445-102201467  | 3 | RNA | GGCCGAGGTCGACTACCGGCGNRG    | GggGgAGGtGg-ATAgAGGCTGG    | - | 5 | 2 | 0 | 2.20 | 1.10 |
| Chr6:165165861-165165883  | 3 | RNA | GGCCGAGGTCGACTACCGGCGNRG    | GgaGAGGagGACT-CCGaAGCG     | - | 5 | 2 | 0 | 2.20 | 1.10 |
| Chr3:111276764-111276786  | 2 | RNA | GGCCGAGGTCGACTACCGGCGNRG    | GGCCG-GTAgAtACCcCGAGG      | - | 5 | 2 | 0 | 2.20 | 1.10 |
| Chr6:66915847-66915869    | 4 | RNA | GGCCGAGGTCGACTACCGGCGNRG    | cCGCCAGcTCGcCA-GrCAG       | + | 5 | 2 | 0 | 2.20 | 1.10 |
| Chr3:135142620-135142642  | 4 | RNA | GGCCGAGGTCGACTACCGGCGNRG    | GGCCGAGGgt-ACcttGgGCTGG    | - | 5 | 1 | 0 | 2.20 | 1.10 |
| Chr10:146259882-146259904 | 3 | DNA | GGCCGAGGTCGACTACCGGCGNRG    | GggtGAGGAGcGAGGgGcCAGCGAG  | - | 5 | 2 | 0 | 2.20 | 1.10 |
| Chr8:12964790-12964812    | 4 | RNA | GGCCGAGGTCGACTACCGGCGNRG    | g-AGGCGGTCGAGcGgGAGCGG     | + | 5 | 2 | 0 | 2.20 | 1.10 |
| Chr4:209203159-209203181  | 2 | RNA | GGCCGAGGTCGACTACCGGCGNRG    | GG-AGGAGCAaTATCCGgGgG      | - | 5 | 2 | 0 | 2.20 | 1.10 |
| Chr8:42382106-42382128    | 4 | DNA | GGCC-AGGTCGACTACCGGCGNRG    | cGCTTCTGgGAGcGtTCCGGtCTG   | - | 5 | 2 | 1 | 1.10 | 1.05 |
| Chr2:166531357-166531379  | 2 | RNA | GGCCGAGGTCGACTACCGGCGNRG    | GGC-AGGcCGAGTACCGGCGG      | - | 2 | 2 | 1 | 1.10 | 1.05 |
| Chr7:162222442-162222464  | 4 | DNA | GGC-CGAGGTCGACTACCGGCGNRG   | GGCTCGAGGAGcGtCTCCGGCTGG   | - | 4 | 1 | 1 | 1.10 | 1.05 |
| Chr6:153883486-153883508  | 4 | RNA | GGCCGAGGTCGACTACCGGCGNRG    | GgCGctGtCTGA-ACtCGaAAG     | - | 5 | 2 | 1 | 1.10 | 1.05 |
| Chr4:157776264-157776286  | 4 | DNA | GGCCGGA-GGTCTGACTACCGGCGNRG | GGGcATCGGCGAGtATGCGCAGG    | + | 5 | 2 | 2 | 1.00 | 1.00 |
| Chr5:70912068-70912090    | 3 | RNA | GGCCGAGGTCGACTACCGGCGNRG    | GGCCG-GTgCAcACCGGAG        | + | 5 | 2 | 2 | 1.00 | 1.00 |
| Chr2:192335731-192335753  | 5 | RNA | GGCCGAGGTCGACTACCGGCGNRG    | GgGCG-GGcCAccttCCGCGCGG    | - | 5 | 1 | 2 | 1.00 | 1.00 |
| Chr7:41494072-41494094    | 3 | RNA | GGCCGAGGTCGACTACCGGCGNRG    | GgGCG-GGcCAccttCCGCGCGG    | + | 5 | 1 | 2 | 1.00 | 1.00 |
| Chr9:85864022-85864044    | 5 | RNA | GGCCGAGGTCGACTACCGGCGNRG    | GGCCGAGG-TgGgG-CAGGCGG     | - | 5 | 1 | 2 | 1.00 | 1.00 |
| Chr8:17821069-17821091    | 5 | RNA | GGCCGAGGTCGACTACCGGCGNRG    | GGC-GAGGTCGAGgACtCGgGAG    | - | 5 | 2 | 0 | 1.00 | 1.00 |
| Chr5:82156214-82156236    | 5 | DNA | GGCCGAGGTCGACTA-CCGCGNRG    | GtGCGAGGcGACTAAcCGCGCGG    | - | 4 | 1 | 2 | 1.00 | 1.00 |
| Chr8:134202546-134202568  | 5 | DNA | GGC-CCGAGGTCGACTACCGGCGNRG  | GGCTCTGGGgGtCAcCccGGCGG    | - | 5 | 2 | 2 | 1.00 | 1.00 |
| Chr1:29555838-29555860    | 5 | RNA | GGCCGAGGTCGACTACCGGCGNRG    | GGCCGAGGcCGA-ActcttGGG     | - | 5 | 2 | 2 | 1.00 | 1.00 |
| Chr8:70500976-70500998    | 5 | RNA | GGCCGAGGTCGACTACCGGCGNRG    | GGCAAGGgGg-cACCGGaTAG      | - | 5 | 2 | 2 | 1.00 | 1.00 |
| Chr7:46564084-46564106    | 3 | RNA | GGCCGAGGTCGACTACCGGCGNRG    | G-CGAGCTCGAGTgGgaAGG       | + | 5 | 2 | 2 | 1.00 | 1.00 |
| Chr4:25306659-25306681    | 5 | RNA | GGCCGAGGTCGACTACCGGCGNRG    | GGCC-AGGTCTGtCAcTCCGCGG    | - | 3 | 1 | 2 | 1.00 | 1.00 |
| Chr2:237257-237279        | 5 | RNA | GGCCGAGGTCGACTACCGGCGNRG    | aGCCCAGGaCG-TACaaGCTGG     | - | 5 | 2 | 0 | 1.00 | 1.00 |
| Chr7:147128045-147128067  | 4 | RNA | GGCCGAGGTCGACTACCGGCGNRG    | GGC-ctcGgGACTACCGCTCGG     | - | 4 | 2 | 2 | 1.00 | 1.00 |
| Chr3:17782486-17782508    | 3 | RNA | GGCCGAGGTCGACTACCGGCGNRG    | GtGCGAGGTCGAGaGgGAGCG      | - | 5 | 1 | 2 | 1.00 | 1.00 |
| Chr4:9698985-9698987      | 3 | DNA | GGCCGAGGTCGACTAC-CCGCGNRG   | GGCCGAGtTCGCTACTCTGtCtCAG  | + | 5 | 2 | 2 | 1.00 | 1.00 |
| Chr5:4621852-4621874      | 4 | RNA | GGCCGAGGTCGACTACCGGCGNRG    | ctGCCAGGcGtGCTACC-CTAG     | - | 5 | 2 | 2 | 1.00 | 1.00 |
| Chr5:148227169-148227191  | 3 | RNA | GGCCGAGGTCGACTACCGGCGNRG    | G-CGAGGTCctctctCCGCGCAG    | + | 5 | 2 | 2 | 1.00 | 1.00 |
| Chr9:10783649-10783671    | 5 | RNA | GGCCGAGGTCGACTACCGGCGNRG    | cGaAGAGcTGCATCT-CGgGTAG    | - | 5 | 1 | 2 | 1.00 | 1.00 |
| Chr1:238446048-238446070  | 5 | RNA | GGCCGAGGTCGACTACCGGCGNRG    | GgGCGGg-aggCTACGCGCGG      | - | 5 | 2 | 2 | 1.00 | 1.00 |
| Chr9:44328395-44328417    | 5 | RNA | GGCCGAGGTCGACTACCGGCGNRG    | GaCCGAGTCtCAcACCG-CCAG     | - | 5 | 1 | 2 | 1.00 | 1.00 |
| Chr5:134292209-134292231  | 5 | RNA | GGCCGAGGTCGACTACCGGCGNRG    | GgaAGAGTCGtCGtCC-CCAG      | - | 4 | 2 | 2 | 1.00 | 1.00 |
| Chr5:108954613-108954635  | 5 | RNA | GGCCGAGGTCGACTACCGGCGNRG    | GGC-GAGGTCSAGaAGcGgaTAG    | - | 4 | 1 | 2 | 1.00 | 1.00 |
| Chr3:301905042-101905064  | 3 | RNA | GGCCGAGGTCGACTACCGGCGNRG    | GGCCGAGcTgGgCAc-GrCtAG     | + | 4 | 2 | 2 | 1.00 | 1.00 |
| Chr1:116621328-116621350  | 3 | RNA | GGCCGAGGTCGACTACCGGCGNRG    | GtGCGAGGTCGACTACCGGCG      | - | 4 | 1 | 2 | 1.00 | 1.00 |
| Chr3:153621295-153621217  | 2 | RNA | GGCCGAGGTCGACTACCGGCGNRG    | GtCAAGAGcGGA-CCGCGCAG      | + | 5 | 2 | 2 | 1.00 | 1.00 |
| Chr6:25868780-25868802    | 5 | DNA | GGCCGAGGTCGACTACCGG-CNRG    | GGCCGgGtCTCGcCAcCGGCAAG    | - | 5 | 2 | 2 | 1.00 | 1.00 |
| Chr10:60042644-60042666   | 5 | DNA | GGCCGAGGT-CCGACTACCGGCGNRG  | GGCTCAATtCTGCTcCTCCGgAGG   | - | 5 | 2 | 2 | 1.00 | 1.00 |
| Chr4:67494805-67494827    | 5 | RNA | GGCCGAGGTCGACTACCGGCGNRG    | GG-GAGcTGCAGagCGgCGAG      | - | 5 | 2 | 2 | 1.00 | 1.00 |
| Chr6:48736027-48736049    | 3 | RNA | GGCCGAGGTCGACTACCGGCGNRG    | GGCCGAG-CCgCaggCAcCAGG     | + | 5 | 2 | 2 | 1.00 | 1.00 |
| Chr1:7611163-7611185      | 3 | DNA | G-GCCGAGGTCGACTACCGGCGNRG   | GATGCAAGGgGAGCAcCCGCGCGG   | + | 5 | 2 | 2 | 1.00 | 1.00 |
| Chr7:3366792-3366814      | 5 | RNA | GGCCGAGGT-CCGACTACCGGCGNRG  | GgCGAGGTCGtGtTACCGTCCAG    | - | 5 | 1 | 2 | 1.00 | 1.00 |
| Chr3:181977050-181977072  | 5 | RNA | GGCCGAGGTCGACTACCGGCGNRG    | GaCGaAGGTGACTA-GrCAG       | - | 5 | 2 | 2 | 1.00 | 1.00 |
| Chr2:240883021-240883043  | 3 | RNA | GGCCGAGGTCGACTACCGGCGNRG    | G-CCGAGGTCGcGgACaCAGTGG    | - | 5 | 1 | 2 | 1.00 | 1.00 |
| Chr2:34657738-34657809    | 5 | RNA | GGCCGAGGTCGACTACCGGCGNRG    | GGCCGAGGTCGACTACCGGCG      | - | 4 | 1 | 2 | 1.00 | 1.00 |
| Chr6:171197823-171197845  | 3 | RNA | GGCCGAGGTCGACTACCGGCGNRG    | cGgCGAGcThG-TACCGGCCGG     | - | 4 | 2 | 2 | 1.00 | 1.00 |
| Chr5:88124067-88124089    | 3 | RNA | GGCCGAGGTCGACTACCGGCGNRG    | GgaTAGGAGgGACT-CCGaCGG     | - | 5 | 2 | 2 | 1.00 | 1.00 |
| Chr4:25873734-25873756    | 3 | RNA | GGCCGAGGTCGACTACCGGCGNRG    | GgaCGAtccGACT-CCGGrTAG     | + | 5 | 1 | 2 | 1.00 | 1.00 |
| Chr8:34018605-34018627    | 3 | RNA | GGCCGAGGTCGACTACCGGCGNRG    | GgaCAAGTCGACTA-aggCAG      | + | 5 | 2 | 2 | 1.00 | 1.00 |
| Chr6:36346864-36346886    | 3 | RNA | GGCCGAGGTCGACTACCGGCGNRG    | GaCCGCGgaatACCT-CCGCGCAG   | - | 5 | 1 | 2 | 1.00 | 1.00 |
| Chr2:188034390-188034412  | 3 | RNA | GGCCGAGGTCGACTACCGGCGNRG    | GcCCAGaGCTCAcCTCa-CCGG     | + | 5 | 2 | 2 | 1.00 | 1.00 |
| Chr3:64478044-64478066    | 5 | RNA | GGCCGAGGTCGACTACCGGCGNRG    | G-aCGGgGTCGAGcAGgAGCGGG    | - | 5 | 1 | 2 | 1.00 | 1.00 |
| Chr7:73682382-73682404    | 3 | RNA | GGCCGAGGTCGACTACCGGCGNRG    | tGCTCCGAGcGAGTgT-GGGCTGG   | - | 5 | 2 | 2 | 1.00 | 1.00 |
| Chr2:71741824-71741846    | 3 | RNA | GGCCGAGGTCGACTACCGGCGNRG    | GaCbaAGGTCGaATACT-CCGG     | - | 5 | 2 | 2 | 1.00 | 1.00 |
| Chr4:153428986-153429008  | 5 | RNA | GGCCGAGGTCGACTACCGGCGNRG    | GGCCCGGcGgG-CAGgGtCGG      | - | 4 | 1 | 2 | 1.00 | 1.00 |
| Chr9:58337476-58337498    | 3 | DNA | GGCCGAGGTCGAC-CTACC         | GgGcCAhTTCGATTCTACCGCGAG   | + | 5 | 2 | 2 | 1.00 | 1.00 |
| Chr9:132678364-132678386  | 3 | RNA | GGCCGAGGTCGACTACCGGCGNRG    | GgGAGAG-CAAGcACCGCGCGG     | + | 4 | 2 | 2 | 1.00 | 1.00 |
| Chr2:207168615-207168637  | 5 | RNA | GGCCGAGGTCGACTACCGGCGNRG    | G-aCGGgGTCGACaCaAggCTGG    | - | 5 | 1 | 2 | 1.00 | 1.00 |
| Chr4:179402651-179402673  | 5 | RNA | GGCCGAGGTCGACTACCGGCGNRG    | GgGtGAGAGgGtGCT-GgGCTGG    | - | 5 | 2 | 0 | 1.00 | 1.00 |
| Chr6:78088383-78088405    | 5 | RNA | GGCCGAGGTCGACTACCGGCGNRG    | tGCCAAgGtGA-ACCGAACCG      | - | 5 | 2 | 2 | 1.00 | 1.00 |
| Chr2:240810882-240810904  | 5 | RNA | GGCCGAGGTCGACTACCGGCGNRG</  |                            |   |   |   |   |      |      |



|                           |           |   |     |                          |                          |   |   |   |   |      |      |
|---------------------------|-----------|---|-----|--------------------------|--------------------------|---|---|---|---|------|------|
| Chr10:129019630-129019652 | 129019647 | 3 | RNA | GGCCGAGGTCGACTACCGGNNRG  | G-aCggGGTCGACaCaagCGGG   | + | 5 | 1 | 2 | 0.00 | 1.00 |
| Chr10:123327514-123327536 | 123327531 | 3 | RNA | GGCCGAGGTCGACTACCGGNNRG  | GGCCGAGGTaGACaA-gtaGAG   | + | 5 | 1 | 2 | 0.00 | 1.00 |
| Chr10:57278910-57278932   | 57278917  | 3 | RNA | GGCCGAGGTCGACTACCGGNNRG  | GGCCGAGGcGCa-AggGGGGGG   | - | 5 | 2 | 2 | 0.00 | 1.00 |
| Chr2:160691875-160691897  | 160691892 | 3 | RNA | GGCCGAGGTCGACTACCGGNNRG  | Gg-ggATCGACccCaCGCGG     | + | 5 | 2 | 2 | 0.00 | 1.00 |
| Chr4:139741790-139741812  | 139741807 | 3 | RNA | GGCCGAGGTCGACTACCGGNNRG  | aGaCGAGTCGACT-CGSGTGG    | + | 5 | 1 | 2 | 0.00 | 1.00 |
| Chr14:14335412-141335434  | 141335419 | 5 | RNA | GGCCGAGGTCGACTACCGGNNRG  | GGCCGAGGc-GaAgTCGAGAG    | - | 5 | 2 | 2 | 0.00 | 1.00 |
| Chr5:19999870-19999887    | 19999887  | 3 | RNA | GGCCGAGGTCGACTACCGGNNRG  | G-aCGGTCGACaACgagCGGG    | + | 5 | 1 | 2 | 0.00 | 1.00 |
| Chr5:154323098-154323120  | 154323105 | 5 | RNA | GGCCGAGGTCGACTACCGGNNRG  | GGC-HtGgGACTACaGGCTGG    | - | 5 | 2 | 2 | 0.00 | 1.00 |
| Chr2:115844734-115844756  | 115844741 | 5 | RNA | GGCCGAGGTCGACTACCGGNNRG  | GGCCaAGcGGc-GcCGCTCGG    | - | 5 | 2 | 2 | 0.00 | 1.00 |
| Chr4:165533463-165533485  | 165533470 | 5 | RNA | GGCCGAGGTCGACTACCGGNNRG  | GGGgAGG-GgGagCCGCGCGG    | - | 4 | 2 | 2 | 0.00 | 1.00 |
| Chr2:4533383-45333405     | 45333400  | 3 | RNA | GGCCGAGGTCGACTACCGGNNRG  | G-aCGAGGTCGACaACgagCGGG  | + | 4 | 1 | 2 | 0.00 | 1.00 |
| Chr1:265313976-265313998  | 265313993 | 3 | RNA | GGCCGAGGTCGACTACCGGNNRG  | aGCCGAGTCTACTAC-GGaAG    | + | 4 | 1 | 2 | 0.00 | 1.00 |
| Chr9:26400028-26400050    | 26400045  | 3 | RNA | GGCCGAGGTCGACTACCGGNNRG  | GTCCG-GTtGcACCGGaATG     | + | 5 | 2 | 2 | 0.00 | 1.00 |
| Chr7:84852888-84852510    | 84852505  | 3 | RNA | GGCCGAGGTCGACTACCGGNNRG  | GGCCGAGGaGg-TtGcCGACAG   | + | 5 | 2 | 2 | 0.00 | 1.00 |
| Chr10:94000556-94000578   | 94000573  | 3 | RNA | GGCCGAGGTCGACTACCGGNNRG  | GaGgaAGTtGgACTA-GCAAG    | + | 5 | 2 | 2 | 0.00 | 1.00 |
| Chr10:66150444-66150466   | 66150451  | 5 | RNA | GGCCGAGGTCGACTACCGGNNRG  | lLcLlAGGTC-GaAGCGGCAAG   | - | 5 | 2 | 2 | 0.00 | 1.00 |
| Chr1:117161254-117161276  | 117161261 | 5 | RNA | GGCCGAGGTCGACTACCGGNNRG  | GGCCGgG-GcAcAgCGGaAG     | - | 5 | 2 | 2 | 0.00 | 1.00 |
| Chr2:86752278-86752300    | 86752295  | 3 | RNA | GGCCGAGGTCGACTACCGGNNRG  | Gg-GcGgTCGgAGCCGCGAG     | + | 5 | 2 | 2 | 0.00 | 1.00 |
| Chr1:229450438-229450460  | 229450455 | 3 | DNA | GGCCGAGGT-CGACTACCGGNNRG | GGaCGAGGTTCCGACaAGGCGGG  | + | 4 | 2 | 2 | 0.00 | 1.00 |
| Chr3:93391071-93391093    | 93391078  | 5 | RNA | GGCCGAGGTCGACTACCGGNNRG  | GaCa-GGTCGAGcCAaAGCGGG   | - | 5 | 1 | 2 | 0.00 | 1.00 |
| Chr2:138645561-138645583  | 138645578 | 3 | RNA | GGCCGAGGTCGACTACCGGNNRG  | GGGGRGG-GATggCCGCGAG     | + | 5 | 2 | 2 | 0.00 | 1.00 |
| Chr2:101562640-101562662  | 101562657 | 3 | RNA | GGCCGAGGTCGACTACCGGNNRG  | GGC-GaAGTtGgCTACtGgATG   | + | 5 | 1 | 2 | 0.00 | 1.00 |
| Chr8:15152296-15152318    | 15152303  | 3 | RNA | GGCCGAGGTCGACTACCGGNNRG  | GgaCCaAGTGG-TcCaGtTG     | - | 5 | 2 | 2 | 0.00 | 1.00 |
| Chr3:178007838-178007860  | 178007855 | 3 | RNA | GGCCGAGGTCGACTACCGGNNRG  | GGC-GAGCaGtagACCGCGTAG   | + | 5 | 1 | 2 | 0.00 | 1.00 |
| Chr2:504965973-204965995  | 204965990 | 3 | RNA | GGCCGAGGTCGACTACCGGNNRG  | c-CGAGtATaGACTaCaCTAG    | + | 5 | 2 | 2 | 0.00 | 1.00 |
| Chr2:25898957-225898979   | 225898964 | 3 | RNA | GGCCGAGGTCGACTACCGGNNRG  | GGCCGAGGTCGACTACCGGNNRG  | + | 5 | 1 | 2 | 0.00 | 1.00 |
| Chr9:142788515-142788537  | 142788522 | 5 | RNA | GGCCGAGGTCGACTACCGGNNRG  | GG-GAGATCGaattCCGCGGG    | - | 5 | 2 | 2 | 0.00 | 1.00 |
| Chr5:4062455-4062477      | 4062462   | 5 | RNA | GGCCGAGGTCGACTACCGGNNRG  | GGGtA-TtGCTtGCGCGCGG     | - | 5 | 2 | 2 | 0.00 | 1.00 |
| Chr1:55835919-55835941    | 55835926  | 5 | DNA | GGCCGAGG-TGACTACCGGNNRG  | cGCGAGaGTCGCTgtGGCTAG    | - | 5 | 1 | 2 | 0.00 | 1.00 |
| Chr2:14263116-14263138    | 14263133  | 3 | RNA | GGCCGAGGTCGACTACCGGNNRG  | GtGcCAAGTTCG-CTgCaGcAG   | + | 5 | 1 | 2 | 0.00 | 1.00 |
| Chr5:199934854-199934876  | 199934861 | 5 | RNA | GGCCGAGGTCGACTACCGGNNRG  | GTCCG-GTtGcACcACCGaAG    | + | 5 | 2 | 2 | 0.00 | 1.00 |
| Chr1:197047925-197047947  | 197047942 | 3 | RNA | GGCCGAGGTCGACTACCGGNNRG  | G-aCGaGCaGAGaACtCGtAG    | + | 5 | 1 | 2 | 0.00 | 1.00 |
| Chr1:32192321-32192343    | 32192338  | 3 | RNA | GGCCGAGGTCGACTACCGGNNRG  | GaCCGgGggGCa-ACCGtCTGG   | + | 5 | 2 | 2 | 0.00 | 1.00 |
| Chr5:93937940-93937962    | 93937947  | 3 | RNA | GGCCGAGGTCGACTACCGGNNRG  | GGGtGgGaGACTAC-GCCGG     | - | 4 | 2 | 2 | 0.00 | 1.00 |
| Chr6:107757665-107757687  | 107757682 | 3 | RNA | GGCCGAGGTCGACTACCGGNNRG  | GGCCCAAGCGCa-AahtGCTAG   | + | 5 | 2 | 2 | 0.00 | 1.00 |
| Chr1:112271048-112271070  | 112271065 | 3 | RNA | GGCCGAGGTCGACTACCGGNNRG  | GG-GAGGCaGagACcGAGAG     | + | 5 | 2 | 2 | 0.00 | 1.00 |
| Chr2:127387923-127387945  | 127387940 | 3 | RNA | GGCCGAGGTCGACTACCGGNNRG  | GGGCGGtGtGCTtGCT-CGGaAG  | + | 5 | 1 | 2 | 0.00 | 1.00 |
| Chr9:7940908-7940930      | 7940925   | 3 | RNA | GGCCGAGGTCGACTACCGGNNRG  | GgGtGAGcTcGA-ACgSgCTAG   | + | 3 | 2 | 2 | 0.00 | 1.00 |
| Chr1:38747461-38747483    | 38747468  | 5 | RNA | GGCCGAGGTCGACTACCGGNNRG  | GGcGAGGTCGagTAg-SgGcAG   | - | 4 | 1 | 2 | 0.00 | 1.00 |
| Chr9:152449405-152449427  | 152449422 | 3 | RNA | GGCCGAGGTCGACTACCGGNNRG  | GGcGAGG-GAGcGtGCGGG      | + | 5 | 2 | 2 | 0.00 | 1.00 |
| Chr1:22495432-22495454    | 22495449  | 3 | RNA | GGCCGAGGTCGACTACCGGNNRG  | GcCCAGGgGCaAcACc-CTGG    | + | 5 | 2 | 2 | 0.00 | 1.00 |
| Chr6:54009023-54009045    | 54009040  | 3 | RNA | GGCCGAGGTCGACTACCGGNNRG  | GGCCGgGgTGaA-TctGcGAG    | + | 5 | 1 | 2 | 0.00 | 1.00 |
| Chr7:137588483-137588505  | 137588490 | 5 | DNA | GGC-CGAGGTGCACTACCGGNNRG | GGCACCGGTCtAGTAgCGGCTGG  | - | 5 | 2 | 2 | 0.00 | 1.00 |
| Chr2:124122825-124122847  | 124122842 | 3 | RNA | GGCCGAGGTCGACTACCGGNNRG  | Ggt-GAGGTGCaGCaCatGaTAG  | + | 5 | 1 | 2 | 0.00 | 1.00 |
| Chr2:163194446-163194468  | 163194463 | 3 | RNA | GGCCGAGGTCGACTACCGGNNRG  | GGCCGAGtAGc-TtGcCGCAAG   | + | 5 | 2 | 2 | 0.00 | 1.00 |
| Chr5:13561317-13561339    | 13561334  | 3 | RNA | GGCCGAGGTCGACTACCGGNNRG  | GgGtGgTCGAGcCaAGcGAG     | + | 5 | 1 | 2 | 0.00 | 1.00 |
| Chr4:208437914-208437936  | 208437931 | 3 | RNA | GGCCGAGGTCGACTACCGGNNRG  | GgaGAGGAGgAGT-CGGaGG     | + | 5 | 2 | 2 | 0.00 | 1.00 |
| Chr3:232570199-232570221  | 232570216 | 3 | RNA | GGCCGAGGTCGACTACCGGNNRG  | GGa-GAGGgaGAGaAGCTGGTG   | + | 5 | 1 | 2 | 0.00 | 1.00 |
| Chr4:173354999-173355021  | 173355016 | 3 | RNA | GGCCGAGGTCGACTACCGGNNRG  | GTCCG-GTtGcACcACCGaAG    | + | 5 | 2 | 2 | 0.00 | 1.00 |
| Chr5:2760202-2760224      | 2760209   | 5 | RNA | GGCCGAGGTCGACTACCGGNNRG  | GGCCGAGcG-CcACcGCGGG     | - | 5 | 2 | 2 | 0.00 | 1.00 |
| Chr3:214825383-214825405  | 214825400 | 3 | RNA | GGCCGAGGTCGACTACCGGNNRG  | GGTCG-GGTgACTcCGcAGG     | + | 5 | 1 | 2 | 0.00 | 1.00 |
| Chr9:77697514-77697536    | 77697531  | 3 | RNA | GGCCGAGGTCGACTACCGGNNRG  | GgGc-AGGcGAGaAGcACCGCGG  | + | 4 | 1 | 2 | 0.00 | 1.00 |
| Chr8:95710211-95710233    | 95710218  | 5 | RNA | GGCCGAGGTCGACTACCGGNNRG  | G-aCGgGTCGaCaACgagCGGG   | + | 5 | 1 | 2 | 0.00 | 1.00 |
| Chr10:120745055-120745077 | 120745062 | 3 | RNA | GGCCGAGGTCGACTACCGGNNRG  | GGC-AGaccGAGtCCGCGGG     | - | 5 | 2 | 2 | 0.00 | 1.00 |
| Chr9:53478402-53478424    | 53478409  | 5 | RNA | GGCCGAGGTCGACTACCGGNNRG  | GtCTGAG-tGACTcAGGCGAG    | - | 5 | 2 | 2 | 0.00 | 1.00 |
| Chr1:86156470-86156492    | 86156477  | 3 | RNA | GGCCGAGGTCGACTACCGGNNRG  | GG-GAGGTCGACTACCGGNNRG   | + | 5 | 2 | 2 | 0.00 | 1.00 |
| Chr7:159036223-159036245  | 159036240 | 3 | RNA | GGCCGAGGTCGACTACCGGNNRG  | cCGCaAaCTAC-CCGCGCGG     | + | 5 | 2 | 2 | 0.00 | 1.00 |
| Chr7:72618723-72618745    | 72618730  | 5 | DNA | GGC-CGAGGTGCACTACCGGNNRG | GcCTCGAGGAGGtCTCCGCTGTG  | - | 4 | 1 | 2 | 0.00 | 1.00 |
| Chr1:306256510-306256532  | 306256517 | 5 | DNA | GGCCGAGG-TGACTACCGGNNRG  | GGGCGAaAGTCTGACTACatGtTG | - | 5 | 1 | 2 | 0.00 | 1.00 |
| Chr3:195835568-195835590  | 195835585 | 3 | RNA | GGCCGAGGTCGACTACCGGNNRG  | GGGcAaGTGG-TtGgCGCGAG    | + | 5 | 2 | 2 | 0.00 | 1.00 |
| Chr7:181053709-181053731  | 181053726 | 3 | RNA | GGCCGAGGTCGACTACCGGNNRG  | GgaGAGGTCGAGcAG-GagCGG   | + | 5 | 1 | 2 | 0.00 | 1.00 |
| Chr1:200694720-200694742  | 200694737 | 3 | RNA | GGCCGAGGTCGACTACCGGNNRG  | GTCCG-GaaGAGaACTCGGaAG   | + | 5 | 2 | 2 | 0.00 | 1.00 |
| Chr1:10504032-10504054    | 10504049  | 3 | X   | GGCCGAGGTCGACTACCGGNNRG  | GGCCGAGaTCCtTggCGCGCGG   | + | 5 | 0 | 2 | 0.00 | 1.00 |
| Chr5:172702656-172702678  | 172702663 | 5 | RNA | GGCCGAGGTCGACTACCGGNNRG  | caCBAAGTTCGCT-CGGGCGAG   | - | 5 | 1 | 2 | 0.00 | 1.00 |
| Chr2:64885770-64885792    | 64885777  | 3 | RNA | GGCCGAGGTCGACTACCGGNNRG  | cCGCCAGGT-GAGcGCGaAG     | + | 5 | 1 | 2 | 0.00 | 1.00 |
| Chr7:68005428-68005449    | 68005445  | 3 | RNA | GGCCGAGGTCGACTACCGGNNRG  | GGCCGAGGTCGACTACCGGNNRG  | + | 5 | 2 | 2 | 0.00 | 1.00 |
| Chr1:266544125-266544147  | 266544132 | 5 | RNA | GGCCGAGGTCGACTACCGGNNRG  | GGC-aAGGTtGcATCCGCTGG    | - | 4 | 1 | 2 | 0.00 | 1.00 |
| Chr4:228259976-228259998  | 228259993 | 3 | RNA | GGCCGAGGTCGACTACCGGNNRG  | TtGgGAGTTCGaggACC-HTGG   | + | 5 | 2 | 2 | 0.00 | 1.00 |
| Chr8:106375413-106375435  | 106375430 | 3 | RNA | GGCCGAGGTCGACTACCGGNNRG  | c-CGcGgCgAaAcACCGGCAAG   | + | 5 | 2 | 2 | 0.00 | 1.00 |
| Chr1:151542562-151542584  | 151542579 | 3 | RNA | GGCCGAGGTCGACTACCGGNNRG  | GGCTC-GcCACTCCGgGcAG     | + | 5 | 2 | 2 | 0.00 | 1.00 |
| Chr2:17800002-17800024    | 17800009  | 3 | RNA | GGCCGAGGTCGACTACCGGNNRG  | GTCCG-GTtGcACcACCGaAG    | + | 5 | 2 | 2 | 0.00 | 1.00 |
| Chr5:93820288-93820310    | 93820305  | 3 | DNA | G-GCCGAGGTGCACTACCGGNNRG | GATAGCCGAGGCGACaCAGGCGAG | + | 4 | 2 | 2 | 0.00 | 1.00 |
| Chr8:146627299-146627321  | 146627306 | 5 | DNA | GGC-CGAGGTGCACTACCGGNNRG | cGCTCtGGgGAGtGtCTCCGCTGG | - | 5 | 2 | 2 | 0.00 | 1.00 |
| Chr4:228197456-228197478  | 228197463 | 3 | RNA | GGCCGAGGTCGACTACCGGNNRG  | GGTCaAG-GACTACtGCTGTG    | - | 4 | 2 | 2 | 0.00 | 1.00 |
| Chr2:15270927-15270949    | 15270944  | 3 | RNA | GGCCGAGGTCGACTACCGGNNRG  | GaTCCGAGcCGAGcCaAaGaaAG  | + | 5 | 1 | 2 | 0.00 | 1.00 |
| Chr1:251528727-251528749  | 251528734 | 3 | RNA | GGCCGAGGTCGACTACCGGNNRG  | GaCCG-GGTCGAGcCaAGcGAG   | + | 5 | 2 | 2 | 0.00 | 1.00 |
| Chr3:86293443-86293465    | 86293450  | 5 | RNA | GGCCGAGGTCGACTACCGGNNRG  | GgaCGAGGTCGG-aggGGCCCGG  | + | 4 | 1 | 2 | 0.00 | 1.00 |
| Chr4:82435430-82435452    | 82435447  | 3 | RNA | GGCCGAGGTCGACTACCGGNNRG  | TtCaGgGtCTGgCTA-GGCTGG   | + | 5 | 2 | 2 | 0.00 | 1.00 |
| Chr9:88565741-88565763    | 88565748  | 5 | X   | GGCCGAGGTCGACTACCGGNNRG  | GaCCGAGGggGaaATACCGCTGG  | - | 5 | 0 | 2 | 0.00 | 1.00 |
| Chr2:193040511-193040533  | 193040518 | 5 | RNA | GGCCGAGGTCGACTACCGGNNRG  | GGGCGAGGcCGAGccC-AGGG    | - | 5 | 2 | 2 | 0.00 | 1.00 |
| Chr8:62989458-62989480    | 62989475  | 3 | RNA | GGCCGAGGTCGACTACCGGNNRG  | cGtGAGcTtG-TACCGCGCTG    | + | 5 | 2 | 2 | 0.00 | 1.00 |
| Chr6:18764727-18764749    | 18764734  | 5 | RNA | GGCCGAGGTCGACTACCGGNNRG  | GTCCG-GTtGcACcACCGaATG   | + | 5 | 2 | 2 | 0.00 | 1.00 |
| Chr8:4558797-4558819      | 4558804   | 5 | RNA | GGCCGAGGTCGACTACCGGNNRG  | GaCC-AGGTCTtCTcCaGcAG    | + | 5 | 1 | 2 | 0.00 | 1.00 |
| Chr1:82134215-82134237    | 82134222  | 3 | RNA | GGCCGAGGTCGACTACCGGNNRG  | GGC-tcGgGACTACCGCTGG     | - | 4 | 2 | 2 | 0.00 | 1.00 |
| Chr7:123319594-123319616  | 123319601 | 3 | RNA | GGCCGAGGTCGACTACCGGNNRG  | GaCCGAGGcGAGTt-GGCAAG    | + | 4 | 2 | 2 | 0.00 | 1.00 |
| Chr4:9978785-9978787      | 9978787   | 3 | RNA | GGCCGAGGTCGACTACCGGNNRG  | GGCCGAGGTCGACTACCGGNNRG  | + | 5 | 2 | 2 | 0.00 | 1.00 |
| Chr1:276024506-276024528  | 276024523 | 3 | RNA | GGCCGAGGTCGACTACCGGNNRG  | TtGgGgGc-GACTACGGCTGG    | + | 5 | 2 | 2 | 0.00 | 1.00 |
| Chr3:30024630-30024652    | 30024637  | 5 | X   | GGCCGAGGTCGACTACCGGNNRG  | GGCCGAGGcGAGtTgGgCGGAG   | + | 5 | 0 | 2 | 0.00 | 1.00 |
| Chr4:127812308-127812330  | 127812315 | 5 | RNA | GGCCGAGGTCGACTACCGGNNRG  | GGCaAGGgGtG-cACCGGaAG    | - | 5 | 2 | 2 | 0.00 | 1.00 |
| Chr3:84602825-84602847    | 84602842  | 3 | RNA | GGCCGAGGTCGACTACCGGNNRG  | GgGcGAGcTtGcTtGgGCGAG    | + | 5 | 1 | 2 | 0.00 | 1.00 |
| Chr8:5994399-5994421      | 5994416   | 3 | RNA | GGCCGAGGTCGACTACCGGNNRG  | G-aCGGTCGACaACgagCGGG    | + | 5 | 0 | 2 | 0.00 | 1.00 |
| Chr4:144602546-144602568  | 144602563 | 3 | X   | GGCCGAGGTCGACTACCGGNNRG  | GGCTGaAGcACTtGtGgGCGAG   | + | 5 | 0 | 2 | 0.00 | 1.00 |
| Chr2:59678565-59678587    | 59678582  | 3 | RNA | GGCCGAGGTCGACTAC         |                          |   |   |   |   |      |      |

|                          |           |   |     |                          |                           |   |   |   |   |      |      |
|--------------------------|-----------|---|-----|--------------------------|---------------------------|---|---|---|---|------|------|
| Chr1:121846086-121846108 | 121846093 | 5 | RNA | GGCCGAGGTCGACTACCGGCNRG  | GGCTGAGaTt-AgaACCGGCGGG   | - | 5 | 1 | 2 | 0.00 | 1.00 |
| Chr7:156838989-156839011 | 156839006 | 3 | RNA | GGCCGAGGTCGACTACCGGCNRG  | caCcaAGTcGcCT-CCGGCCAG    | + | 5 | 1 | 2 | 0.00 | 1.00 |
| Chr8:15436603-15436625   | 15436620  | 3 | RNA | GGCCGAGGTCGACTACCGGCNRG  | GgCG-GGcCActCCGGCCGG      | + | 5 | 1 | 2 | 0.00 | 1.00 |
| Chr7:88111977-88111999   | 88111994  | 3 | DNA | GGCCGAGGTCGA-CTACCGGCNRG | aGCCGAGGcCGATcGACCGaGAG   | + | 5 | 1 | 2 | 0.00 | 1.00 |
| Chr1:106347042-106347064 | 106347049 | 5 | RNA | GGCCGAGGTCGACTACCGGCNRG  | GGC-AGGaCGaTAaaGaCCGG     | - | 5 | 2 | 2 | 0.00 | 1.00 |
| Chr7:165223996-165224018 | 165224013 | 3 | RNA | GGCCGAGGTCGACTACCGGCNRG  | G-CCGAGGcCGaGgtCGGCCAG    | + | 5 | 1 | 2 | 0.00 | 1.00 |
| Chr3:220370964-220370986 | 220370981 | 3 | RNA | GGCCGAGGTCGACTACCGGCNRG  | GGC-ItGgGaTtACCGGCTGG     | + | 5 | 2 | 2 | 0.00 | 1.00 |
| Chr8:4996049-4996071     | 4996056   | 5 | RNA | GGCCGAGGTCGACTACCGGCNRG  | ccCCGgGGTcGA-AaCGCCGAG    | - | 5 | 2 | 2 | 0.00 | 1.00 |
| Chr2:3969609-3969631     | 3969616   | 5 | RNA | GGCCGAGGTCGACTACCGGCNRG  | GGCCGAGGgt-ACtCGGCTCTGG   | - | 5 | 1 | 2 | 0.00 | 1.00 |
| Chr4:176776870-176776892 | 176776877 | 5 | DNA | GGCCGAGGTCGACTACCG- CNRG | GGTCGAGGTCTGAgTcgaGCCCTGG | - | 5 | 2 | 2 | 0.00 | 1.00 |
| Chr8:79847512-79847534   | 79847519  | 5 | RNA | GGCCGAGGTCGACTACCGGCNRG  | GgaagGgGaTcGACTA-GggGAG   | - | 5 | 2 | 2 | 0.00 | 1.00 |
| Chr6:137270185-137270207 | 137270202 | 3 | RNA | GGCCGAGGTCGACTACCGGCNRG  | aGCCGAGGgtGcCT-CgGGCAGG   | + | 5 | 1 | 2 | 0.00 | 1.00 |
| Chr1:65383212-65383234   | 65383229  | 3 | RNA | GGCCGAGGTCGACTACCGGCNRG  | cGCCGcGGTCTGcCat-GGCAGG   | + | 5 | 2 | 2 | 0.00 | 1.00 |
| Chr1:302484041-302484063 | 302484048 | 5 | RNA | GGCCGAGGTCGACTACCGGCNRG  | GcCtaAGGTCTGAC-ggCGCGCGG  | - | 5 | 1 | 2 | 0.00 | 1.00 |
| Chr1:158686361-158686383 | 158686368 | 5 | RNA | GGCCGAGGTCGACTACCGGCNRG  | GgGcGgGGTtGgCT-CCGgAGG    | - | 5 | 1 | 2 | 0.00 | 1.00 |
| Chr4:146127556-146127578 | 146127573 | 3 | RNA | GGCCGAGGTCGACTACCGGCNRG  | GGCgaHtGT-GaCaACCGaAG     | + | 5 | 1 | 2 | 0.00 | 1.00 |
| Chr8:95686187-95686209   | 95686194  | 5 | RNA | GGCCGAGGTCGACTACCGGCNRG  | GGC-ItcGgGACTACCGCTCTGG   | - | 5 | 2 | 2 | 0.00 | 1.00 |
| Chr6:19132057-19132079   | 19132074  | 3 | RNA | GGCCGAGGTCGACTACCGGCNRG  | GcCgGgGGTCTGACTt-GgaAGG   | + | 5 | 2 | 2 | 0.00 | 1.00 |
| Chr5:59842963-59842985   | 59842980  | 3 | RNA | GGCCGAGGTCGACTACCGGCNRG  | G- CGAGGaCaCaACCaGaAG     | + | 5 | 2 | 2 | 0.00 | 1.00 |
| Chr4:109179406-109179428 | 109179423 | 3 | RNA | GGCCGAGGTCGACTACCGGCNRG  | GtCCGAGGaC-CTAaCTGCGAG    | + | 4 | 2 | 2 | 0.00 | 1.00 |
| Chr7:68498628-68498650   | 68498645  | 3 | DNA | GGCCGAGGTCGACTACC-GGCNRG | GcCaGAGtCTGgCCaCATGGCCAG  | + | 5 | 2 | 2 | 0.00 | 1.00 |
| Chr3:157868846-157868868 | 157868863 | 3 | RNA | GGCCGAGGTCGACTACCGGCNRG  | aGCCaAGGaCG-TACaaGCTGG    | + | 5 | 2 | 2 | 0.00 | 1.00 |
| Chr3:43610460-43610482   | 43610467  | 5 | RNA | GGCCGAGGTCGACTACCGGCNRG  | GGC-ItcGaGACTACCGCTCTGG   | - | 4 | 2 | 2 | 0.00 | 1.00 |
| Chr3:880380-880402       | 880387    | 5 | RNA | GGCCGAGGTCGACTACCGGCNRG  | GtCaGAG-TCGACctGgGGCGAG   | - | 5 | 1 | 2 | 0.00 | 1.00 |
| Chr7:12856794-12856816   | 12856801  | 5 | RNA | GGCCGAGGTCGACTACCGGCNRG  | aGCCGgGTt-GgCatCCGCTCTGG  | - | 5 | 1 | 2 | 0.00 | 1.00 |
| Chr5:18497644-18497666   | 18497661  | 3 | RNA | GGCCGAGGTCGACTACCGGCNRG  | GGC-AGGcCGAgcACCaCCGG     | + | 5 | 2 | 2 | 0.00 | 1.00 |
| Chr8:96805245-96805267   | 96805262  | 3 | RNA | GGCCGAGGTCGACTACCGGCNRG  | GaCCGAGGT-GAGgNcaGaAGG    | + | 5 | 1 | 2 | 0.00 | 1.00 |
| Chr3:207124871-207124893 | 207124888 | 3 | RNA | GGCCGAGGTCGACTACCGGCNRG  | GGaCcAGGTG-GTcCCaGHTGG    | + | 5 | 2 | 2 | 0.00 | 1.00 |
| Chr2:204542876-204542898 | 204542893 | 3 | RNA | GGCCGAGGTCGACTACCGGCNRG  | GGC-ItcGgGACTACCGCTCTGG   | + | 4 | 2 | 2 | 0.00 | 1.00 |
| Chr4:117792293-117792315 | 117792300 | 5 | RNA | GGCCGAGGTCGACTACCGGCNRG  | G-attGgGTCCTGCaCaCGGGCGGG | - | 5 | 1 | 2 | 0.00 | 1.00 |
